# Supplementary material for: Epstein–Barr virus nuclear antigen 2 extensively rewires the human chromatin landscape at autoimmune risk loci
Source: PubMed Central journal article supplement (PMC8647835; doi:10.1101/gr.264705.120), 2021-12
Supplement: supp_gr.264705.120_Supplemental_Fig_S1.pdf [file supp_gr.264705.120_Supplemental_Fig_S1.pdf]

**A**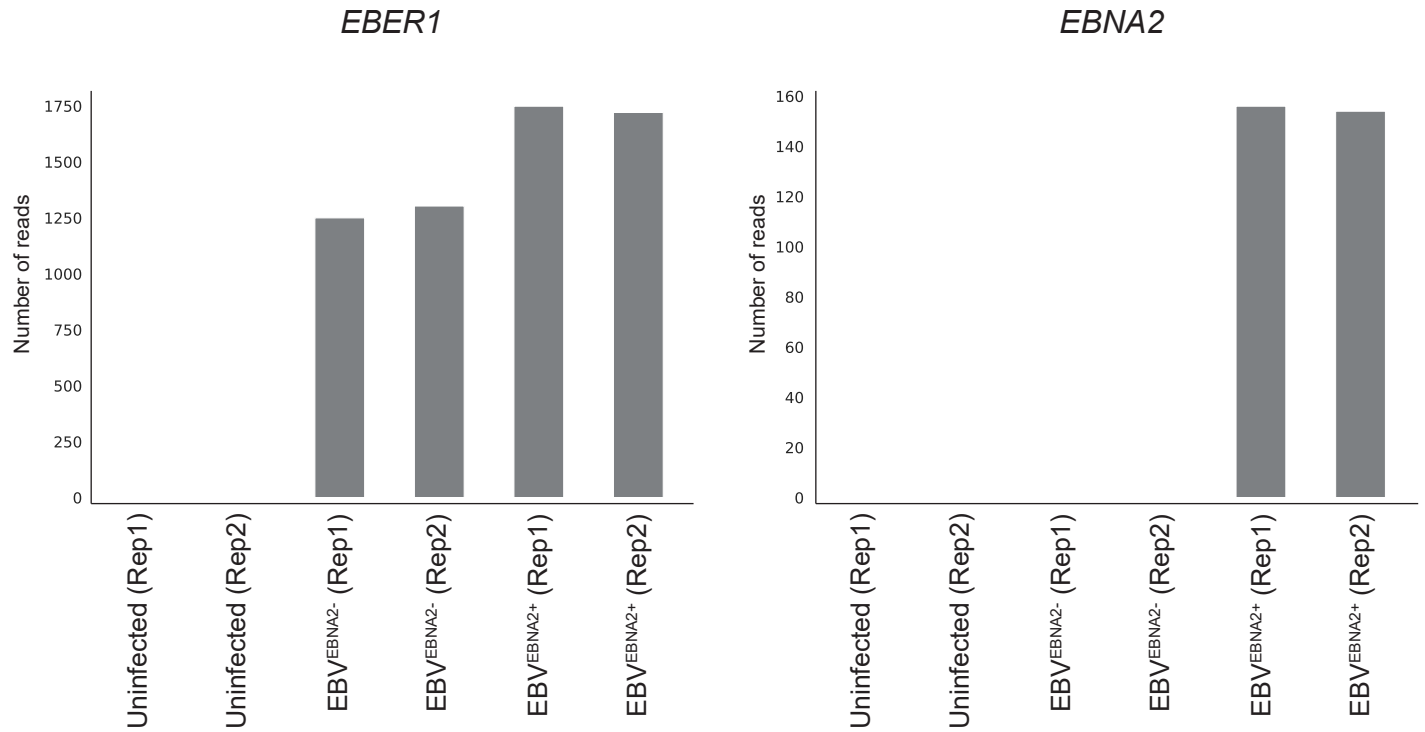**B**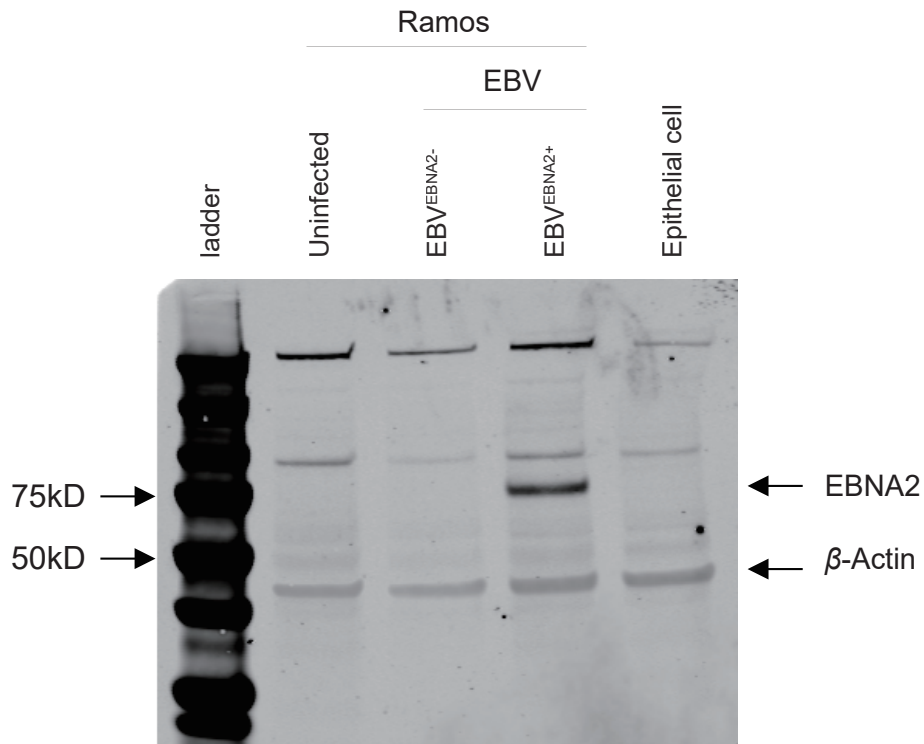

**Supplemental Figure 1.** Expression of EBV genes in uninfected, EBV<sup>EBNA2-</sup>, and EBV<sup>EBNA2+</sup> Ramos cells. (A) Gene expression (read count) of *EBER1* and *EBNA2* among infection types. (B) Western blot showing differential EBNA2 expression among infection types.
