# Supplementary material for: Epstein–Barr virus nuclear antigen 2 extensively rewires the human chromatin landscape at autoimmune risk loci
Source: PubMed Central journal article supplement (PMC8647835; doi:10.1101/gr.264705.120), 2021-12
Supplement: supp_gr.264705.120_Supplemental_Fig_S2.pdf [file supp_gr.264705.120_Supplemental_Fig_S2.pdf]

**A**

Gene expression  
EBV<sup>EBNA2+</sup> vs uninfected

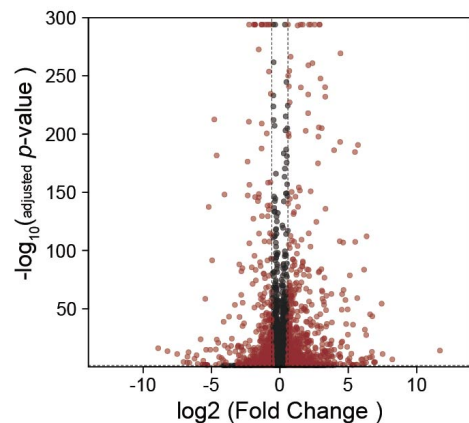**B**

Gene expression  
EBV<sup>EBNA2-</sup> vs uninfected

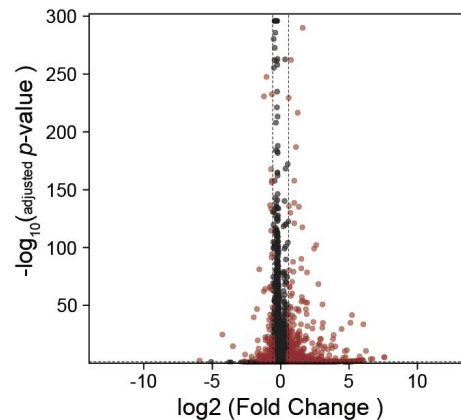**C**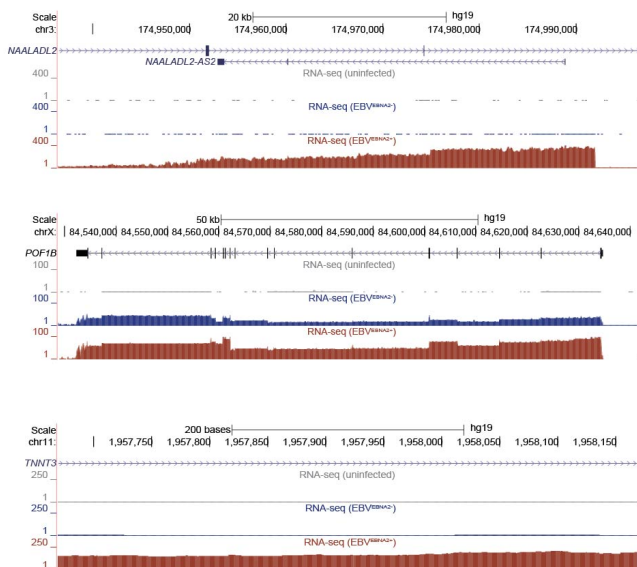**D**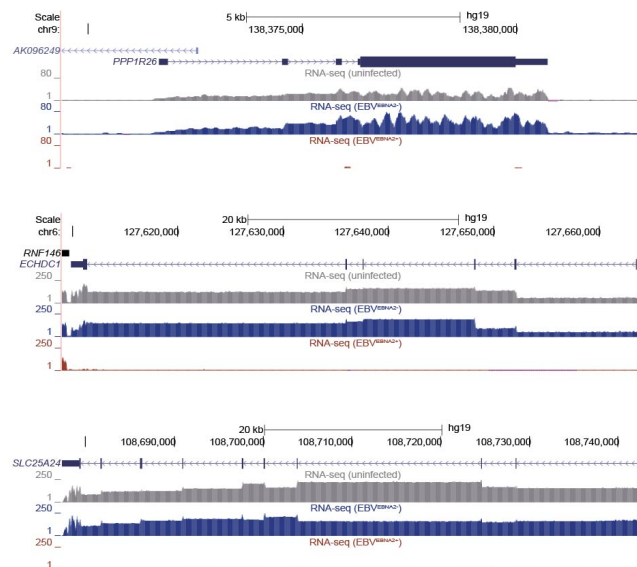**E**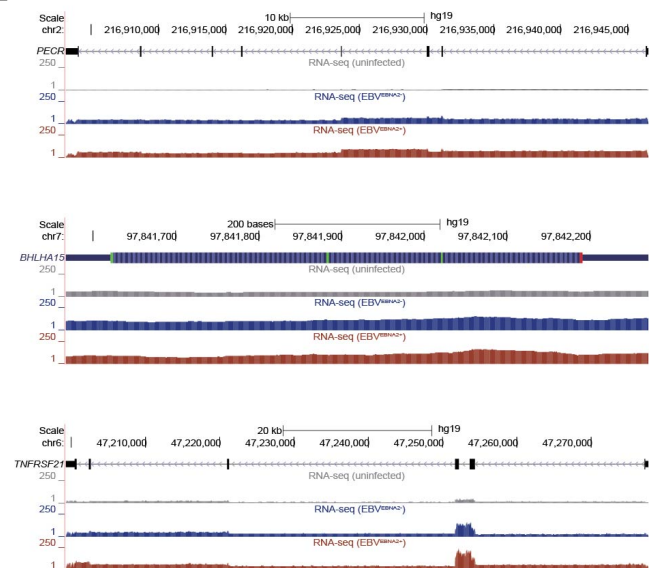**F**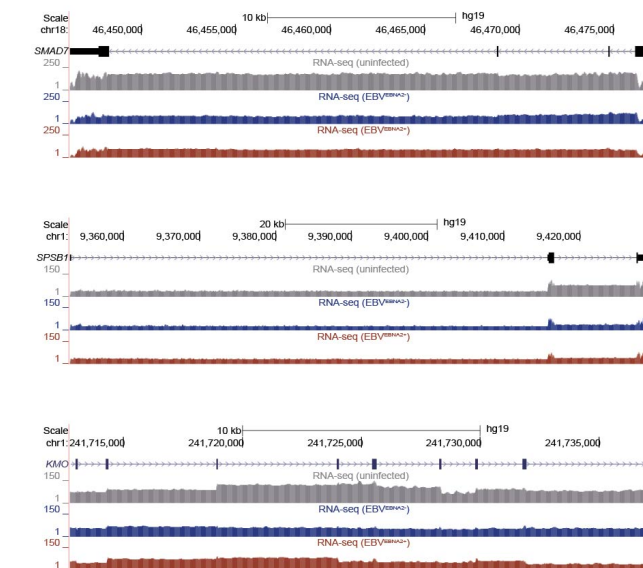

**Supplemental Figure 2.** EBNA2-dependent human gene expression in Ramos B cells. (A,B). Volcano plots showing differential human gene expression upon infection with EBV<sup>EBNA2+</sup> (A) and EBV<sup>EBNA2-</sup> (B) virus. (C,D) Examples of EBNA2-dependent differentially expressed genes in the UCSC Genome Browser (hg19) showing up-regulated genes (C) and down-regulated genes (D). (E,F) UCSC Genome Browser (hg19) depicting the EBV-dependent EBNA2-independent up-regulated genes (E) and down-regulated genes (F).
