# Supplementary material for: Epstein–Barr virus nuclear antigen 2 extensively rewires the human chromatin landscape at autoimmune risk loci
Source: PubMed Central journal article supplement (PMC8647835; doi:10.1101/gr.264705.120), 2021-12
Supplement: supp_gr.264705.120_Supplemental_Fig_S3.pdf [file supp_gr.264705.120_Supplemental_Fig_S3.pdf]

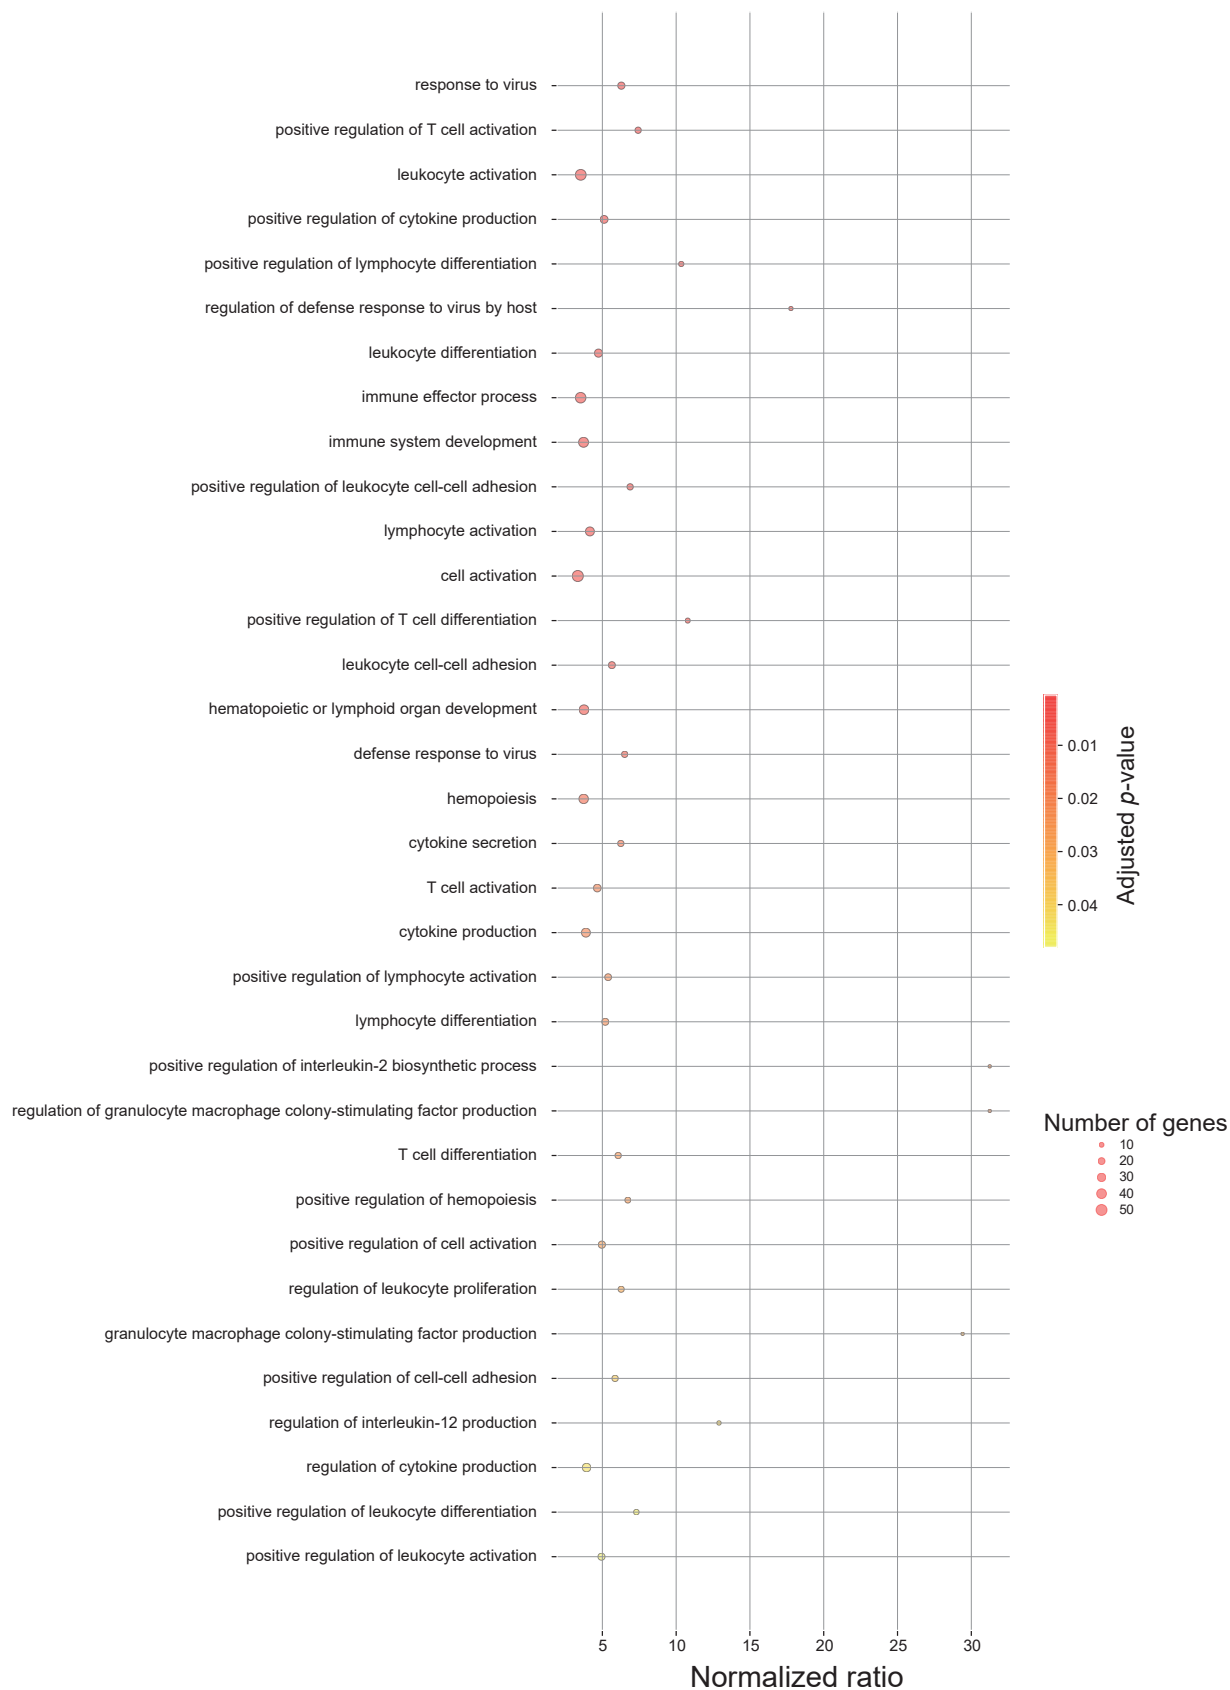

**Supplemental Figure 3.** Functional enrichment analysis for EBNA2-dependent differentially expressed genes. Gene set enrichment analyses of EBNA2-dependent differentially expressed genes for GO Biological Process. The X-axis indicates the normalized ratio of the number of input genes to the total number of annotated genes times 100. The Y-axis is sorted by significance (i.e., lower p-values are at the top of the plot). Analysis was performed using ToppFun from ToppGene Suite (<https://toppgene.cchmc.org/enrichment.jsp>). Bonferroni correction was used to adjust the *p*-values.
