# Supplementary material for: Epstein–Barr virus nuclear antigen 2 extensively rewires the human chromatin landscape at autoimmune risk loci
Source: Genome Res. 2021 Dec;31(12):2185–98. doi: 10.1101/gr.264705.120 (PMC8647835; doi:10.1101/gr.264705.120)
Supplement: Supplemental Material [file supp_gr.264705.120_Supplemental_Table_S5_THIRD_REVISION.xlsx]

## Sheet: README
Epstein-Barr virus nuclear antigen 2 (EBNA2) extensively rewires the human chromatin landscape at autoimmune risk loci
This document contains the HOMER TF motif enrichment results for EBNA2 ChIP-seq datasets.
Comments, additions, or subtractions should be addressed to the corresponding authors:
Lean Kottyan (Leah.Kottyan@cchmc.org)
Matt Weirauch (Matthew.Weirauch@cchmc.org)
The first tab contains the HOMER motif enrichment results for EBNA2 Ramos ChIP-seq.
The second tab contains the HOMER motif enrichment results for EBNA2 GM12878 ChIP-seq.
The third tab contains the HOMER motif enrichment results for EBNA2 open chromatin
The fourth tab contains the HOMER motif enrichment results for EBNA2 closed chromatin
The fifth tab contains the summary of the EBNA2 partner motif enrichment across EBNA2 Ramos and GM12878 datasets
The columns in the all tabs except fifth are identical:
Motif Name	Name of motif for a set of transcription factors. A given motif can have multiple TFs when the TFs have similar DNA binding domains. See Cis-BP database.
Consensus	The consensus DNA binding site (IUPAC format).
P-value	p-value calculated by HOMER.
Log P-value	The natural log of the HOMER p-value.
q-value (Benjamini)	Q-value from Benjamini adjustment.
# of Target Sequences with Motif	Number of input sequences containing this motif.
% of Target Sequences with Motif	Percent of input sequences containing this motif.
# of Background Sequences with Motif	Number of background sequences containing this motif.
% of Background Sequences with Motif	Percent of background sequences containing this motif.

## Sheet: EBNA2 Ramos ChIP-seq HOMER
Motif Name	Consensus	P-value	Log P-value	q-value (Benjamini)	# of Target Sequences with Motif(of 5750)	% of Target Sequences with Motif	# of Background Sequences with Motif(of 34828)	% of Background Sequences with Motif
M10710_2.00:MEIS1:MEIS2:MEIS3:PKNOX1:PKNOX2:TGIF1:TGIF2	ATGATTTATGRB	1e-314	-723.7	0	575	0.0995	445.8	0.0123
M09767_2.00:ARID5A:ARID5B	AACCACAATACCAA	1e-268	-619.1	0	602	0.1041	608.9	0.0169
M10463_2.00:EBF1	TCYCAGGGGAATTB	1e-253	-583.3	0	787	0.1361	1140.3	0.0316
M09574_2.00:HOXA10:HOXA11:HOXA5:HOXA6:HOXA7:HOXA9:HOXB5:HOXB6:HOXB8:HOXB9:HOXC10:HOXC11:HOXC5:HOXC6:HOXC8:HOXC9:HOXD10:HOXD11:HOXD8:HOXD9	TGATTTATGGCC	1e-251	-578	0	432	0.0747	303.1	0.0084
M08137_2.00:HOXA10:HOXA11:HOXA5:HOXA6:HOXA7:HOXA9:HOXB5:HOXB6:HOXB8:HOXB9:HOXC10:HOXC11:HOXC5:HOXC6:HOXC8:HOXC9:HOXD10:HOXD11:HOXD8:HOXD9	RTGATTTATGGCC	1e-230	-529.7	0	455	0.0787	389.5	0.0108
M05444_2.00:POU2F2	KCATTABSATAATGV	1e-218	-502.2	0	548	0.0948	630.8	0.0175
M09789_2.00:MLXIPL	GTGCACGTGRSAC	1e-216	-497.7	0	805	0.1392	1368.2	0.0379
M05122_2.00:HOXA13:HOXB13:HOXC13:HOXD13	GTTTTATTGSS	1e-207	-478.5	0	588	0.1017	768.9	0.0213
M10752_2.00:PBX1:PBX2:PBX3:PBX4	RTGATTTATKGC	1e-201	-463.2	0	632	0.1093	916.6	0.0254
M09575_2.00:HOXA10:HOXA11:HOXA5:HOXA6:HOXA7:HOXA9:HOXB5:HOXB6:HOXB8:HOXB9:HOXC10:HOXC11:HOXC5:HOXC6:HOXC8:HOXC9:HOXD10:HOXD11:HOXD8:HOXD9	TGATTTATGGCC	1e-193	-444.6	0	595	0.1029	846	0.0234
M09174_2.00:ALX1:ALX3:ALX4:ARX:BARHL1:BARHL2:BARX1:BARX2:BSX:DRGX:EMX1:EMX2:EN1:EN2:ESX1:EVX1:EVX2:GBX1:GBX2:GSX1:GSX2:HESX1:HOXA1:HOXA2:HOXA3:HOXA4:HOXA5:HOXB1:HOXB2:HOXB3:HOXB4:HOXB5:HOXC4:HOXC5:HOXD1:HOXD3:HOXD4:LBX1:MEOX1:MEOX2:MIXL1:MNX1:MSX1:MSX2:NANOG:NANOGP8:NKX1-1:NKX1-2:PDX1:PHOX2A:PHOX2B:PROP1:PRRX1:PRRX2:RAX:RAX2:SHOX:SHOX2:TLX1:TLX3:UNCX:VAX1:VAX2:VENTX:VSX1:VSX2	TGATTTATGGCYT	1e-180	-414.8	0	591	0.1022	889.6	0.0246
M08138_2.00:HOXA10:HOXA11:HOXA5:HOXA6:HOXA7:HOXA9:HOXB5:HOXB6:HOXB8:HOXB9:HOXC10:HOXC11:HOXC5:HOXC6:HOXC8:HOXC9:HOXD10:HOXD11:HOXD8:HOXD9	TGATTTATGGC	1e-179	-413	0	598	0.1034	913.3	0.0253
M05350_2.00:POU6F1	NTAATGAGATGCDN	1e-174	-402	0	602	0.1041	947.8	0.0263
M09197_2.00:CDX1:CDX2:CDX4	TGATTTATKGCY	1e-171	-394.8	0	609	0.1053	983.1	0.0272
M08728_2.00:CLOCK	TSBKCACGTGKCTG	1e-165	-380.6	0	891	0.1541	1984.8	0.055
M08760_2.00:CLOCK	TSBKCACGTGKCTG	1e-165	-380.6	0	891	0.1541	1984.8	0.055
M05650_2.00:ESR1:ESR2:NR1D1:NR1D2:NR1H2:NR1H3:NR1H4:NR2C1:NR2C2:NR2F1:NR2F2:NR2F6:NR4A1:NR4A2:NR4A3:NR5A2:NR6A1:PPARA:PPARD:PPARG:RARA:RARB:RARG:RORA:RORB:RORC:RXRA:RXRB:RXRG	AAGGTCATGACCTT	1e-149	-344.5	0	343	0.0593	351.6	0.0097
M05652_2.00:ESR1:ESR2:NR1D1:NR1D2:NR1H2:NR1H3:NR1H4:NR2C1:NR2C2:NR2F1:NR2F2:NR2F6:NR4A1:NR4A2:NR4A3:NR5A2:NR6A1:PPARA:PPARD:PPARG:RARA:RARB:RARG:RORA:RORB:RORC:RXRA:RXRB:RXRG	AAGGTCACGACCTY	1e-145	-335.8	0	350	0.0605	378	0.0105
M03074_2.00:TFCP2:UBP1	RAACCGGTTT	1e-140	-324.1	0	439	0.0759	625.5	0.0173
M10329_2.00:ZNF718	GTTAAGGARA	1e-140	-323.5	0	615	0.1064	1171.9	0.0325
M01722_2.00:HEY1:HEY2:HEYL	GCACGTGTC	1e-136	-314.3	0	1086	0.1879	3026.6	0.0838
M08913_2.00:ZNF146	TTTTCATGGCTGMATAGTATTCCA	1e-134	-310	0	423	0.0732	606.9	0.0168
M09166_2.00:HOXA3:HOXA4:HOXA5:HOXA6:HOXA7:HOXB3:HOXB4:HOXB5:HOXB6:HOXB7:HOXB8:HOXC4:HOXC5:HOXC6:HOXC8:HOXD3:HOXD4:HOXD8:PDX1	CATYAATCAA	1e-133	-307.7	0	660	0.1142	1371.4	0.038
M09206_2.00:HOXA3:HOXA4:HOXA5:HOXA6:HOXA7:HOXB3:HOXB4:HOXB5:HOXB6:HOXB7:HOXB8:HOXC4:HOXC5:HOXC6:HOXC8:HOXD3:HOXD4:HOXD8:PDX1	CATYAATCAA	1e-133	-307.7	0	660	0.1142	1371.4	0.038
M00273_2.00:CRX:DMBX1:DPRX:GSC:GSC2:OTX1:OTX2:PITX1:PITX2:PITX3:TPRX1	NAYTAATCCMN	1e-132	-304	0	942	0.1629	2468.1	0.0684
M05131_2.00:CDX1:CDX2:CDX4	GTTTTATKGCC	1e-128	-294.7	0	744	0.1287	1721.8	0.0477
M05114_2.00:HOXA10:HOXA11:HOXA6:HOXA9:HOXB6:HOXB8:HOXB9:HOXC10:HOXC11:HOXC12:HOXC6:HOXC8:HOXC9:HOXD10:HOXD11:HOXD12:HOXD8:HOXD9	RTTTTATTAC	1e-127	-293	0	766	0.1325	1811.9	0.0502
M05611_2.00:ESR1:ESR2:NR1D1:NR1D2:NR1H2:NR1H3:NR1H4:NR2C1:NR2C2:NR2F1:NR2F2:NR2F6:NR4A1:NR5A2:NR6A1:PPARA:PPARD:PPARG:RARA:RARB:RARG:RORA:RORB:RORC:RXRA:RXRB:RXRG	RAGGTCAYGACCTY	1e-126	-291.8	0	361	0.0624	469.5	0.013
M05337_2.00:HOXA10:HOXA11:HOXA6:HOXA9:HOXB6:HOXB8:HOXB9:HOXC10:HOXC11:HOXC12:HOXC6:HOXC8:HOXC9:HOXD10:HOXD11:HOXD12:HOXD8:HOXD9	GTTTTATTRCC	1e-125	-289.8	0	711	0.123	1614.1	0.0447
M07781_2.00:ZNF8	AYGTACCACATT	1e-123	-285.4	0	525	0.0908	971.6	0.0269
M08959_2.00:ZNF260	TTTWTATGGCTGCATAGTATTCCA	1e-123	-283.4	0	426	0.0737	666.9	0.0185
M05332_2.00:HOXA10:HOXA11:HOXA5:HOXA6:HOXA7:HOXA9:HOXB5:HOXB6:HOXB8:HOXB9:HOXC10:HOXC11:HOXC5:HOXC6:HOXC8:HOXC9:HOXD10:HOXD11:HOXD8:HOXD9	DTTTTATTGC	1e-122	-283	0	765	0.1323	1844.3	0.0511
M08725_2.00:ARNTL	RGTCACGTGGM	1e-122	-281.9	0	1191	0.206	3650.8	0.1011
M09131_2.00:HOXA10:HOXA11:HOXA5:HOXA6:HOXA7:HOXA9:HOXB5:HOXB6:HOXB8:HOXB9:HOXC10:HOXC11:HOXC5:HOXC6:HOXC8:HOXC9:HOXD10:HOXD11:HOXD8:HOXD9	CCATAAATCAT	1e-122	-281.4	0	676	0.1169	1512.8	0.0419
M09203_2.00:HOXA10:HOXA11:HOXA5:HOXA6:HOXA7:HOXA9:HOXB5:HOXB6:HOXB8:HOXB9:HOXC10:HOXC11:HOXC5:HOXC6:HOXC8:HOXC9:HOXD10:HOXD11:HOXD8:HOXD9	CCATAAATCAT	1e-122	-281.4	0	676	0.1169	1512.8	0.0419
M00562_2.00:CRX:DMBX1:DPRX:GSC:GSC2:OTX1:OTX2:PITX1:PITX2:PITX3:TPRX1	MTTAATCCCN	1e-119	-274.9	0	989	0.1711	2795.4	0.0774
M01204_2.00:TIGD1	NTATTGCGCT	1e-116	-268.5	0	506	0.0875	952.9	0.0264
M09973_2.00:BATF:BATF3	AAATGACTG	1e-116	-268.1	0	567	0.0981	1161.2	0.0322
M09473_2.00:CLOCK	CACGTGDC	1e-114	-264.6	0	1239	0.2143	3967.3	0.1099
M09045_2.00:EBF1:EBF2:EBF3:EBF4	RGTCCCWGGGGAS	1e-113	-261.3	0	480	0.083	885	0.0245
M05608_2.00:ESR1:ESR2:NR1D1:NR1D2:NR1H2:NR1H3:NR1H4:NR2C1:NR2C2:NR2F1:NR2F2:NR2F6:NR4A1:NR5A2:NR6A1:PPARA:PPARD:PPARG:RARA:RARB:RARG:RORA:RORB:RORC:RXRA:RXRB:RXRG	RAGGTCAYGACCTY	1e-112	-258.5	0	374	0.0647	564.2	0.0156
M00311_2.00:CRX:DMBX1:DPRX:GSC:GSC2:OTX1:OTX2:PITX1:PITX2:PITX3:TPRX1	TTAATCCC	1e-111	-257.4	0	1059	0.1832	3189.5	0.0883
M10413_2.00:RBPJ	ASCGTGGGAAM	1e-109	-252.8	0	526	0.091	1063.4	0.0295
M10415_2.00:RBPJ	ABTGTGGGAAMCK	1e-109	-252.3	0	360	0.0623	536.1	0.0148
M08329_2.00:ZNF146	GCTGYATARTATTCC	1e-109	-252	0	463	0.0801	853.6	0.0236
M09527_2.00:EBF1:EBF2:EBF3:EBF4	DGTCCCYRGGGA	1e-109	-251.4	0	517	0.0894	1036.4	0.0287
M09148_2.00:MEIS1:MEIS2:MEIS3:PKNOX1:PKNOX2:TGIF1:TGIF2	ATGATTTATGRB	1e-106	-244.1	0	652	0.1128	1552.1	0.043
M09178_2.00:MEIS1:MEIS2:MEIS3:PKNOX1:PKNOX2:TGIF1:TGIF2	ATGATTTATGRB	1e-106	-244.1	0	652	0.1128	1552.1	0.043
M05597_2.00:NR1D2:NR1H2:NR1H3:NR1H4:NR2C1:NR2C2:NR2F1:NR2F2:NR2F6:NR4A1:NR4A2:NR4A3:NR5A2:NR6A1:PPARA:PPARD:PPARG:RARA:RARB:RARG:RORA:RORB:RORC:RXRA:RXRB:RXRG	VRGGTCATGACCYB	1e-103	-239	0	396	0.0685	671.7	0.0186
M10643_2.00:HOXA10:HOXA11:HOXA5:HOXA6:HOXA7:HOXA9:HOXB5:HOXB6:HOXB8:HOXB9:HOXC10:HOXC11:HOXC5:HOXC6:HOXC8:HOXC9:HOXD10:HOXD11:HOXD8:HOXD9	DTGATTTATGGT	1e-103	-237.3	0	655	0.1133	1589.8	0.044
M11093_2.00:ESR1:ESR2:NR1D1:NR1D2:NR1H2:NR1H3:NR1H4:NR2C1:NR2C2:NR2F1:NR2F2:NR2F6:NR4A1:NR4A2:NR4A3:NR5A1:NR5A2:NR6A1:PPARA:PPARD:PPARG:RARA:RARB:RARG:RORA:RORB:RORC:RXRA:RXRB:RXRG:THRA:THRB	TAANTRGGTCA	1e-102	-235.4	0	776	0.1342	2081.5	0.0577
M09532_2.00:ELF1:ELF2:ELF4:ELK1:ELK3:ELK4:ERF:ERG:ETS1:ETS2:ETV1:ETV2:ETV3:ETV3L:ETV4:ETV5:FEV:FLI1:GABPA	ACAGGAAGTG	1e-101	-233.1	0	744	0.1287	1960.6	0.0543
M03782_2.00:CDX1:CDX2:CDX4:HOXA13:HOXC13	GKTTTATGGCNB	1e-101	-232.9	0	789	0.1365	2146	0.0594
M09235_2.00:IRF4:IRF8	RAAAGAGGAASTGAAASY	1e-100	-230.3	0	146	0.0253	78.1	0.0022
M07926_2.00:BCL11A:BCL11B	BTTTCASTTCCTCTT	1e-95	-220.9	0	295	0.051	412.9	0.0114
M09052_2.00:ELF1:ELF2:ELF4:ELK1:ELK3:ELK4:ERF:ERG:ETS1:ETS2:ETV1:ETV2:ETV3:ETV3L:ETV4:ETV5:FEV:FLI1:GABPA	RGRCAGGAAGTGG	1e-92	-213	0	636	0.11	1610.6	0.0446
M04153_2.00:HEY1	GACACGTGCV	1e-91	-211.8	0	1228	0.2124	4248	0.1177
M04144_2.00:MSGN1	NRMCATATGGYN	1e-90	-209.3	0	1182	0.2045	4044.4	0.112
M04145_2.00:MSGN1	NRMCATATGGYN	1e-89	-206.5	0	1295	0.224	4611.4	0.1277
M09044_2.00:EBF1	DGTCCCTGGGGACYT	1e-88	-203.2	0	344	0.0595	592.1	0.0164
M09133_2.00:BARX1:BARX2:BSX:DLX1:DLX2:DLX3:DLX4:DLX5:DLX6:EMX1:EMX2:EN1:EN2:EVX1:EVX2:GBX1:GBX2:GSX1:GSX2:HOXA1:HOXA2:HOXA3:HOXA4:HOXA5:HOXB1:HOXB2:HOXB3:HOXB4:HOXB5:HOXC4:HOXC5:HOXD1:HOXD3:HOXD4:ISX:MEOX1:MEOX2:MNX1:MSX1:MSX2:NANOG:NANOGP8:NKX1-1:NKX1-2:PDX1:PROP1:SHOX:SHOX2:UNCX:VAX1:VAX2:VENTX	TTGATGGATG	1e-87	-201.7	0	640	0.1107	1673	0.0463
M09196_2.00:BARX1:BARX2:BSX:DLX1:DLX2:DLX3:DLX4:DLX5:DLX6:EMX1:EMX2:EN1:EN2:EVX1:EVX2:GBX1:GBX2:GSX1:GSX2:HOXA1:HOXA2:HOXA3:HOXA4:HOXA5:HOXB1:HOXB2:HOXB3:HOXB4:HOXB5:HOXC4:HOXC5:HOXD1:HOXD3:HOXD4:ISX:MEOX1:MEOX2:MNX1:MSX1:MSX2:NANOG:NANOGP8:NKX1-1:NKX1-2:PDX1:PROP1:SHOX:SHOX2:UNCX:VAX1:VAX2:VENTX	TTGATGGATG	1e-87	-201.7	0	640	0.1107	1673	0.0463
M04802_2.00:ELF1:ELF2:ELF4:ELK1:ELK3:ELK4:ERF:ERG:ETS1:ETS2:ETV1:ETV2:ETV3:ETV3L:ETV4:ETV5:FEV:FLI1:GABPA	GACCGGAAGTR	1e-86	-200.3	0	999	0.1728	3242.7	0.0898
M00664_2.00:FOXC1:FOXC2:FOXD1:FOXD2:FOXD3:FOXD4:FOXD4L1:FOXD4L3:FOXD4L4:FOXD4L5:FOXD4L6:FOXE1:FOXF1:FOXF2:FOXI1:FOXL1:FOXL2:FOXS1	ATAAACAA	1e-85	-197.9	0	883	0.1527	2729.3	0.0756
M04977_2.00:HOXA13:HOXB13:HOXC13:HOXD13	GTTTTATTGGB	1e-84	-195.6	0	480	0.083	1078.1	0.0299
M06320_2.00:CRX:DMBX1:DPRX:GSC:GSC2:OTX1:OTX2:PITX1:PITX2:PITX3:TPRX1	STTAATCC	1e-83	-193.2	0	1124	0.1944	3876.7	0.1074
M08119_2.00:FOXH1	YNSAATCCACA	1e-82	-190.6	0	831	0.1437	2538.1	0.0703
M09243_2.00:IRF4:IRF8	RAAAGAGGAASTGAAACH	1e-82	-189.9	0	163	0.0282	138.3	0.0038
M07756_2.00:ZFP57	GCGGCA	1e-82	-189.1	0	672	0.1162	1861.7	0.0516
M05112_2.00:HOXA10:HOXA11:HOXA6:HOXA9:HOXB6:HOXB8:HOXB9:HOXC10:HOXC11:HOXC12:HOXC6:HOXC8:HOXC9:HOXD10:HOXD11:HOXD12:HOXD8:HOXD9	RTTTTATTGC	1e-81	-187.8	0	844	0.146	2612.7	0.0724
M04691_2.00:DMRT1:DMRT2:DMRT3:DMRTA2:DMRTC2	AATGTAKCAATT	1e-81	-187.6	0	460	0.0796	1032.7	0.0286
M11326_2.00:SOX1:SOX10:SOX11:SOX12:SOX13:SOX14:SOX15:SOX17:SOX18:SOX2:SOX21:SOX3:SOX30:SOX4:SOX5:SOX6:SOX7:SOX8:SOX9:SRY	KYTCTTTGTTTK	1e-78	-181.7	0	806	0.1394	2478	0.0686
M09020_2.00:RBPJ	KTTCCCACGCY	1e-77	-179	0	1478	0.2557	5751.1	0.1593
M09519_2.00:RBPJ:RBPJL	HTTTCCCASG	1e-77	-178.8	0	1464	0.2532	5680.4	0.1573
M04981_2.00:HOXA13:HOXB13:HOXC13:HOXD13	DTTTTATTGGN	1e-76	-175.5	0	830	0.1436	2620.9	0.0726
M03085_2.00:HOXA10:HOXA11:HOXA5:HOXA6:HOXA7:HOXA9:HOXB5:HOXB6:HOXB8:HOXB9:HOXC10:HOXC11:HOXC5:HOXC6:HOXC8:HOXC9:HOXD10:HOXD11:HOXD8:HOXD9	NNTTTTACGACH	1e-74	-172.1	0	668	0.1156	1927.9	0.0534
M05341_2.00:HOXA10:HOXA11:HOXA6:HOXA9:HOXB6:HOXB8:HOXB9:HOXC10:HOXC11:HOXC12:HOXC6:HOXC8:HOXC9:HOXD10:HOXD11:HOXD12:HOXD8:HOXD9	GTTTTATTRCC	1e-73	-170.1	0	471	0.0815	1136	0.0315
M04979_2.00:HOXA13:HOXB13:HOXC13:HOXD13	KTTTTATTGGN	1e-72	-166.3	0	832	0.1439	2685.4	0.0744
M00140_2.00:ZNF410	CCATCCCA	1e-71	-165.6	0	731	0.1264	2235.9	0.0619
M00336_2.00:PAX2:PAX6	GTGCACAC	1e-71	-164.1	0	1297	0.2244	4952.2	0.1372
M09478_2.00:ARNTL	CACGTGNC	1e-70	-163.1	0	1430	0.2474	5643.3	0.1563
M03175_2.00:HOXA13:HOXB13:HOXC13:HOXD13	KTTTTATTGG	1e-70	-162.9	0	905	0.1565	3044.6	0.0843
M00529_2.00:TPRX1	TTAATCCC	1e-70	-161.4	0	1145	0.1981	4212.1	0.1167
M05124_2.00:HOXA13:HOXB13:HOXC13:HOXD13	GTTTTATTGGB	1e-68	-157.6	0	991	0.1714	3489.8	0.0967
M10779_2.00:HOXA10:HOXA11:HOXA6:HOXA9:HOXB6:HOXB8:HOXB9:HOXC10:HOXC11:HOXC12:HOXC5:HOXC6:HOXC8:HOXC9:HOXD10:HOXD11:HOXD12:HOXD8:HOXD9	VSNTTTATGGCNVN	1e-68	-156.9	0	517	0.0894	1371.5	0.038
M00938_2.00:MAX	CCACGTGC	1e-66	-153.8	0	1772	0.3065	7555.3	0.2093
M05335_2.00:HOXA10:HOXA11:HOXA6:HOXA9:HOXB6:HOXB8:HOXB9:HOXC10:HOXC11:HOXC12:HOXC6:HOXC8:HOXC9:HOXD10:HOXD11:HOXD12:HOXD8:HOXD9	GTTTTATKGCC	1e-65	-151.7	0	859	0.1486	2904.4	0.0804
M04805_2.00:SPI1:SPIB:SPIC	RAAWGMGGAAGTD	1e-65	-151.1	0	482	0.0834	1256.1	0.0348
M10725_2.00:CDX1:CDX2:CDX4	ADANTTTTATKRCC	1e-64	-148.9	0	399	0.069	942.8	0.0261
M10672_2.00:BARHL1:BARHL2:EMX1:EMX2:HMX1:HMX2:HMX3:HOXA4:HOXB4:HOXC4:HOXD4:LBX2:NKX1-1:NKX1-2:TLX1:TLX2:TLX3:VAX1:VAX2:VENTX	CGGTAAKTGG	1e-64	-148.1	0	928	0.1605	3256.3	0.0902
M01978_2.00:FOXC1:FOXC2:FOXD1:FOXD2:FOXD3:FOXD4:FOXD4L1:FOXD4L3:FOXD4L4:FOXD4L5:FOXD4L6:FOXE1:FOXG1:FOXI1:FOXI2:FOXI3:FOXJ3:FOXK2:FOXL1:FOXL2:FOXS1	GTAAACAA	1e-63	-146.8	0	994	0.1719	3585	0.0993
M04782_2.00:ELF1:ELF2:ELF4:ELK1:ELK3:ELK4:ERF:ERG:ETS1:ETS2:ETV1:ETV2:ETV3:ETV3L:ETV4:ETV5:FEV:FLI1:GABPA	NACCGGAAGYN	1e-63	-146.7	0	1489	0.2576	6107.2	0.1692
M03100_2.00:HOXA13:HOXB13:HOXC13:HOXD13	KTTTTATTGG	1e-63	-146.4	0	1066	0.1844	3941.9	0.1092
M08455_2.00:RBPJ	AKYTMGKTTCCCACAV	1e-63	-145.9	0	193	0.0334	267.5	0.0074
M04132_2.00:HEY1:HEY2:HEYL	BACACGTGCV	1e-63	-145.5	0	1424	0.2463	5776.8	0.16
M10461_2.00:EBF1:EBF2:EBF3:EBF4	KTCCCTTGGGA	1e-62	-144.9	0	530	0.0917	1480.3	0.041
M09021_2.00:RBPJ	TTTTCCCASGV	1e-62	-144.8	0	1498	0.2591	6174.7	0.171
M05018_2.00:CDX1:CDX2:CDX4	GTTTTATGGCC	1e-62	-144.7	0	496	0.0858	1341.9	0.0372
M04755_2.00:ELF1:ELF2:ELF4:ELK1:ELK3:ELK4:ERF:ERG:ETS1:ETS2:ETV1:ETV2:ETV3:ETV3L:ETV4:ETV5:FEV:FLI1:GABPA	NRSCGGAAGTR	1e-62	-143	0	1423	0.2462	5795.2	0.1605
M09236_2.00:IRF4:IRF8	RAAAGRGGAAGTGAAASTRR	1e-61	-141.9	0	91	0.0157	50.7	0.0014
M09246_2.00:IRF4:IRF8	RAAAGRGGAAGTGAAASTRR	1e-61	-141.9	0	91	0.0157	50.7	0.0014
M03783_2.00:CDX1:CDX2:CDX4:HOXA13:HOXC13	VDTTTATGRCNH	1e-61	-141.1	0	899	0.1555	3168.7	0.0878
M11187_2.00:ESR1:ESR2:NR1D1:NR1D2:NR1H2:NR1H3:NR1H4:NR2C1:NR2C2:NR2F1:NR2F2:NR2F6:NR4A1:NR4A2:NR4A3:NR5A1:NR5A2:NR6A1:PPARA:PPARD:PPARG:RARA:RARB:RARG:RORA:RORB:RORC:RXRA:RXRB:RXRG:THRA:THRB	TGACCYA	1e-60	-138.9	0	890	0.154	3141.2	0.087
M09459_2.00:ARNT:ARNT2	GCACGTAY	1e-60	-138.8	0	1456	0.2519	6011.5	0.1665
M05395_2.00:HOXA10:HOXA11:HOXA6:HOXA9:HOXB6:HOXB8:HOXB9:HOXC10:HOXC11:HOXC12:HOXC6:HOXC8:HOXC9:HOXD10:HOXD11:HOXD12:HOXD8:HOXD9	DTTTTATTACC	1e-60	-138.4	0	487	0.0842	1333.3	0.0369
M10462_2.00:EBF1	ATTCCCYTGGGRN	1e-59	-136.5	0	814	0.1408	2797.9	0.0775
M09047_2.00:ELF5:SPI1:SPIB:SPIC	AAAAAGAGGAAGTGRRR	1e-58	-135.7	0	148	0.0256	168.8	0.0047
M04155_2.00:HEY1	VACACGYGCV	1e-58	-134.3	0	1377	0.2382	5639.4	0.1562
M11316_2.00:LEF1:TCF7:TCF7L1:TCF7L2	ATCAAAGVVM	1e-58	-133.6	0	1702	0.2944	7393.9	0.2048
M09108_2.00:FOXO1:FOXO3:FOXO4:FOXO6	GTAAACAGGM	1e-56	-129.3	0	1983	0.343	9007.6	0.2495
M04753_2.00:ELF1:ELF2:ELF4:ELK1:ELK3:ELK4:ERF:ERG:ETS1:ETS2:ETV1:ETV2:ETV3:ETV3L:ETV4:ETV5:FEV:FLI1:GABPA	NACCGGAAGTR	1e-56	-129	0	826	0.1429	2908	0.0805
M05085_2.00:HOXA10:HOXA11:HOXC10:HOXC11:HOXC12:HOXD10:HOXD11:HOXD12:MEOX1	VGTAATAAAAH	1e-55	-128.2	0	837	0.1448	2967.2	0.0822
M05025_2.00:CRX:DMBX1:DPRX:GSC:GSC2:OTX1:OTX2:PITX1:PITX2:PITX3:TPRX1	YTAATCCYYY	1e-55	-127.3	0	1186	0.2052	4713.4	0.1306
M10012_2.00:MAFF	AAAATGCTGAC	1e-55	-127.3	0	446	0.0771	1217.7	0.0337
M09569_2.00:CRX:DMBX1:DPRX:GSC:GSC2:OTX1:OTX2:PITX1:PITX2:PITX3:TPRX1	NYTAATCCYB	1e-55	-127.2	0	1300	0.2249	5306.5	0.147
M09432_2.00:TBP:TBPL2	CTATAAAARG	1e-55	-126.7	0	958	0.1657	3568.3	0.0988
M07944_2.00:ELF5:SPI1:SPIB:SPIC	VAAAAGAGGAAGTGAAAVH	1e-54	-125.4	0	76	0.0131	38.6	0.0011
M04763_2.00:ELF1:ELF2:ELF4:ELK1:ELK3:ELK4:ERF:ERG:ETS1:ETS2:ETV1:ETV2:ETV3:ETV3L:ETV4:ETV5:FEV:FLI1:GABPA	RACMGGAAATS	1e-53	-124.1	0	762	0.1318	2640.2	0.0731
M09064_2.00:SPI1:SPIB:SPIC	ARAAAGAGGAAGTGAAA	1e-53	-123.8	0	111	0.0192	100.7	0.0028
M04803_2.00:SPI1:SPIB:SPIC	DAWGCGGAAGTR	1e-53	-123.5	0	441	0.0763	1214.4	0.0336
M09831_2.00:TWIST1:TWIST2	MHACACMTGGD	1e-53	-122.2	0	1972	0.3411	9035.6	0.2503
M04983_2.00:HOXA13:HOXB13:HOXC13:HOXD13	RTTTTATTGGN	1e-52	-121.3	0	764	0.1322	2670.4	0.074
M09538_2.00:ELF5:SPI1:SPIB:SPIC	AGAGGAAGTG	1e-52	-120.4	0	496	0.0858	1461.5	0.0405
M05109_2.00:HOXA10:HOXA11:HOXA5:HOXA6:HOXA7:HOXA9:HOXB5:HOXB6:HOXB8:HOXB9:HOXC10:HOXC11:HOXC5:HOXC6:HOXC8:HOXC9:HOXD10:HOXD11:HOXD8:HOXD9	DTTTTATTGC	1e-52	-120.3	0	853	0.1476	3106	0.086
M04547_2.00:ZBTB26	NTTTTCTRGATH	1e-52	-119.9	0	734	0.127	2539	0.0703
M10476_2.00:ELF5:SPI1:SPIB:SPIC	TTTCACTTC	1e-51	-119.5	0	351	0.0607	872.9	0.0242
M09537_2.00:SPI1:SPIB:SPIC	AAAGRGGAAGTG	1e-51	-118.9	0	365	0.0631	929.9	0.0258
M09528_2.00:ELF1:ELF2:ELF4:ELK1:ELK3:ELK4:ERF:ERG:ETS1:ETS2:ETV1:ETV2:ETV3:ETV3L:ETV4:ETV5:FEV:FLI1:GABPA	AACCGGAAGT	1e-50	-116.3	0	759	0.1313	2683	0.0743
M05129_2.00:CDX1:CDX2:CDX4	GTTTTATKGCC	1e-50	-115.9	0	537	0.0929	1664.7	0.0461
M00752_2.00:MLX	CACGTGNHN	1e-50	-115.2	0	2244	0.3882	10690.7	0.2961
M01716_2.00:MNT	NCACGTGNN	1e-49	-115.1	0	2135	0.3693	10060.2	0.2787
M04159_2.00:NPAS2	DACRCATGTY	1e-49	-115.1	0	1698	0.2937	7590.7	0.2103
M05111_2.00:HOXA10:HOXA11:HOXA5:HOXA6:HOXA7:HOXA9:HOXB5:HOXB6:HOXB8:HOXB9:HOXC10:HOXC11:HOXC5:HOXC6:HOXC8:HOXC9:HOXD10:HOXD11:HOXD8:HOXD9	GTTTTATTGC	1e-49	-115	0	898	0.1553	3369	0.0933
M09068_2.00:SPI1:SPIB:SPIC	AAAAGAGGAAGTGAAAV	1e-49	-114.6	0	90	0.0156	68.1	0.0019
M09838_2.00:MYF5:MYOD1:MYOG	SRACAGGTGKTG	1e-49	-113.9	0	636	0.11	2123.1	0.0588
M08881_2.00:BCL11A:BCL11B	YTYTCACTTCCTCTTTY	1e-49	-113.8	0	221	0.0382	422.9	0.0117
M04211_2.00:ASCL1:ASCL2	RGCAGCTGCY	1e-49	-113.6	0	898	0.1553	3381.4	0.0937
M09065_2.00:ELF5:SPI1:SPIB:SPIC	RRAAAGAGGAAGTGV	1e-49	-113.3	0	188	0.0325	318.2	0.0088
M07945_2.00:ELF5:SPI1:SPIB:SPIC	AAAGAGGAAGTGAAACYND	1e-48	-112.8	0	62	0.0107	26.4	0.0007
M09795_2.00:TCF12:TCF3:TCF4	AHKAACAGGTGTTMVM	1e-48	-112.6	0	316	0.0547	765.2	0.0212
M04800_2.00:ELF1:ELF2:ELF4:ELK1:ELK3:ELK4:ERF:ERG:ETS1:ETS2:ETV1:ETV2:ETV3:ETV3L:ETV4:ETV5:FEV:FLI1:GABPA	NRCCGGAWGYR	1e-48	-111.9	0	735	0.1271	2602.1	0.0721
M05339_2.00:HOXA10:HOXA11:HOXA6:HOXA9:HOXB6:HOXB8:HOXB9:HOXC10:HOXC11:HOXC12:HOXC6:HOXC8:HOXC9:HOXD10:HOXD11:HOXD12:HOXD8:HOXD9	RTTTTATTRCC	1e-48	-110.9	0	516	0.0893	1601.7	0.0444
M09092_2.00:FOXH1	SAATCCACA	1e-48	-110.7	0	1062	0.1837	4235.1	0.1173
M06087_2.00:SCRT1:SCRT2	ACCACCTGTTGMA	1e-48	-110.6	0	204	0.0353	375.5	0.0104
M07946_2.00:ELF5:SPI1:SPIB:SPIC	AAAAAGAGGAAGTGV	1e-47	-109.8	0	94	0.0163	80.6	0.0022
M03098_2.00:HOXA13:HOXB13:HOXC13:HOXD13	DTTTTATTGG	1e-47	-108.8	0	1157	0.2001	4746.2	0.1315
M09577_2.00:CRX:DMBX1:DPRX:GSC:GSC2:OTX1:OTX2:PITX1:PITX2:PITX3:TPRX1	GCTAATCC	1e-46	-107.9	0	1433	0.2479	6225.5	0.1724
M03230_2.00:HOXA10:HOXA11:HOXA6:HOXA9:HOXB6:HOXB8:HOXB9:HOXC10:HOXC11:HOXC12:HOXC6:HOXC8:HOXC9:HOXD10:HOXD11:HOXD12:HOXD8:HOXD9	DTTTTAYGAC	1e-46	-107.3	0	721	0.1247	2570.2	0.0712
M04804_2.00:SPI1:SPIB:SPIC	AAWGRGGAAGTR	1e-45	-105.6	0	372	0.0643	1016.4	0.0282
M04806_2.00:SPI1:SPIB:SPIC	RAAWGRGGAAGTR	1e-45	-105.1	0	315	0.0545	791.9	0.0219
M01735_2.00:CLOCK	NVCACGTGBN	1e-45	-104.8	0	1992	0.3446	9383.1	0.2599
M11294_2.00:LEF1:TCF7:TCF7L1:TCF7L2	KGWSWWCAAAGV	1e-45	-104.3	0	1134	0.1962	4673.9	0.1295
M06277_2.00:ALX1:ALX3:ALX4:ARX:BARX1:BARX2:BSX:DLX1:DLX2:DLX3:DLX4:DLX5:DLX6:DRGX:EMX1:EMX2:EN1:EN2:ESX1:EVX1:EVX2:GBX1:GBX2:GSX1:GSX2:HMX1:HMX3:HOXA1:HOXA2:HOXA3:HOXA4:HOXA5:HOXA7:HOXB1:HOXB2:HOXB3:HOXB4:HOXB5:HOXB7:HOXC4:HOXC5:HOXD1:HOXD3:HOXD4:ISX:LHX2:LHX3:LHX4:LHX9:MEOX1:MEOX2:MIXL1:MNX1:MSX1:MSX2:NANOG:NANOGP8:NKX1-1:NKX1-2:NOTO:OTP:PDX1:PHOX2A:PHOX2B:PROP1:PRRX1:PRRX2:RAX:RAX2:SEBOX:SHOX:S…	AATTTTAATG	1e-44	-103.5	0	1124	0.1944	4629.1	0.1282
M11317_2.00:LEF1:TCF7:TCF7L1:TCF7L2	NVATCAAAGM	1e-44	-103.3	0	1968	0.3404	9267.9	0.2567
M07803_2.00:MYC	CACGTGSH	1e-44	-102.8	0	1832	0.3169	8501.6	0.2355
M08303_2.00:SNAI1	CVCTGCACCTGCTSC	1e-44	-102.4	0	379	0.0656	1060.4	0.0294
M01143_2.00:CREB3L1:CREB3L2:CREB3L4	KACGTGGC	1e-44	-101.9	0	1139	0.197	4724.6	0.1309
M10464_2.00:EBF1	TCCCHDGGG	1e-44	-101.5	0	1223	0.2116	5172.1	0.1433
M04742_2.00:EHF:ELF1:ELF2:ELF3:ELF4:ELF5:ELK1:ELK3:ELK4:ERF:ERG:ETS1:ETS2:ETV1:ETV2:ETV3:ETV3L:ETV4:ETV5:ETV6:ETV7:FEV:FLI1:GABPA:SPDEF	AAVCAGGAAGTR	1e-43	-101.2	0	515	0.0891	1655.9	0.0459
M02869_2.00:MAF:MAFA:MAFB:MAFG:MAFK:NRL	HGTCAGCAHTTT	1e-43	-99.65	0	442	0.0765	1342.4	0.0372
M01721_2.00:MLX	NCACGTGMHH	1e-43	-99.62	0	1840	0.3183	8590.8	0.238
M09821_2.00:MYF5:MYF6:MYOD1:MYOG	TGACAGCTGSWGB	1e-43	-99.27	0	473	0.0818	1480.7	0.041
M04081_2.00:MLX	TCACRTGM	1e-43	-99.2	0	2315	0.4004	11341.8	0.3142
M03141_2.00:HOXA13:HOXB13:HOXC13:HOXD13	DTTTTATTGG	1e-42	-98.89	0	997	0.1725	4018.4	0.1113
M10475_2.00:ELF5:SPI1:SPIB:SPIC	ACTTCCTCT	1e-42	-98.22	0	488	0.0844	1553.4	0.043
M07567_2.00:ZNF671	YYVMTCCACTCH	1e-42	-97.91	0	850	0.147	3281.9	0.0909
M05768_2.00:SOX1:SOX10:SOX11:SOX12:SOX13:SOX14:SOX15:SOX17:SOX18:SOX2:SOX21:SOX3:SOX30:SOX4:SOX5:SOX6:SOX7:SOX8:SOX9:SRY	AGAACAATRG	1e-42	-97.86	0	1369	0.2368	5998.4	0.1662
M04544_2.00:ZNF296	TRSTGGACABT	1e-42	-97.59	0	982	0.1699	3955	0.1095
M04795_2.00:ELF1:ELF2:ELF4:ELK1:ELK3:ELK4:ERF:ERG:ETS1:ETS2:ETV1:ETV2:ETV3:ETV3L:ETV4:ETV5:FEV:FLI1:GABPA	RACCGGAAGTR	1e-42	-97.55	0	510	0.0882	1656.2	0.0459
M02985_2.00:ELF1:ELF2:ELF4:ELK1:ELK3:ELK4:ERF:ERG:ETS1:ETS2:ETV1:ETV2:ETV3:ETV3L:ETV4:ETV5:FEV:FLI1:GABPA	ACCGGAARTV	1e-42	-96.83	0	478	0.0827	1517.9	0.042
M04208_2.00:ASCL1:ASCL2	RGCAGCTGCY	1e-41	-96.55	0	1118	0.1934	4673	0.1294
M05397_2.00:HOXA10:HOXA11:HOXA6:HOXA9:HOXB6:HOXB8:HOXB9:HOXC10:HOXC11:HOXC12:HOXC6:HOXC8:HOXC9:HOXD10:HOXD11:HOXD12:HOXD8:HOXD9	DTTTTATTACC	1e-41	-94.77	0	526	0.091	1747.8	0.0484
M08026_2.00:ELF5:SPI1:SPIB:SPIC	RAAAAGAGGAAGTGR	1e-41	-94.65	0	111	0.0192	137.5	0.0038
M02857_2.00:MAF:MAFA:MAFB:MAFG:MAFK	GTCAGCAWWWTT	1e-40	-94.16	0	541	0.0936	1820.4	0.0504
M04721_2.00:ELF1:ELF2:ELF4:ELK1:ELK3:ELK4:ERF:ERG:ETS1:ETS2:ETV1:ETV2:ETV3:ETV3L:ETV4:ETV5:FEV:FLI1:GABPA	RACAGGAAGTG	1e-40	-92.18	0	650	0.1124	2348.9	0.0651
M04772_2.00:ELF1:ELF2:ELF4:ELK1:ELK3:ELK4:ERF:ERG:ETS1:ETS2:ETV1:ETV2:ETV3:ETV3L:ETV4:ETV5:FEV:FLI1:GABPA	VACAGGAARTG	1e-39	-91.9	0	799	0.1382	3081.7	0.0854
M08118_2.00:FOXC1:FOXC2:FOXG1:FOXI1:FOXI3:FOXJ2:FOXJ3:FOXK1:FOXK2:FOXP1:FOXP3:FOXP4	AWGTAAACANV	1e-39	-91.47	0	1123	0.1943	4755.4	0.1317
M04777_2.00:ELF1:ELF2:ELF4:ELK1:ELK3:ELK4:ERF:ERG:ETS1:ETS2:ETV1:ETV2:ETV3:ETV3L:ETV4:ETV5:FEV:FLI1:GABPA	VACMGGAARTS	1e-39	-91.41	0	830	0.1436	3241.4	0.0898
M05832_2.00:MAX	CACGTG	1e-39	-91.1	0	2382	0.412	11866.1	0.3287
M04130_2.00:CLOCK	NACRCATGTY	1e-39	-90.45	0	1928	0.3335	9226.3	0.2556
M03780_2.00:CDX1:CDX2:CDX4:HOXA13:HOXC13	NTTTTATKGCYY	1e-39	-90.42	0	575	0.0995	2005.8	0.0556
M05104_2.00:HOXA10:HOXA11:HOXA5:HOXA6:HOXA7:HOXA9:HOXB5:HOXB6:HOXB8:HOXB9:HOXC10:HOXC11:HOXC5:HOXC6:HOXC8:HOXC9:HOXD10:HOXD11:HOXD8:HOXD9	DTTTTATTGC	1e-39	-90.32	0	911	0.1576	3663.7	0.1015
M09078_2.00:ELF1:ELF2:ELF4:ELK1:ELK3:ELK4:ERF:ERG:ETS1:ETS2:ETV1:ETV2:ETV3:ETV3L:ETV4:ETV5:FEV:FLI1:GABPA	GRGRCAGGAAGTGG	1e-38	-89.75	0	384	0.0664	1147.9	0.0318
M05399_2.00:HOXA10:HOXA11:HOXA6:HOXA9:HOXB6:HOXB8:HOXB9:HOXC10:HOXC11:HOXC12:HOXC6:HOXC8:HOXC9:HOXD10:HOXD11:HOXD12:HOXD8:HOXD9	GTTTTATKRCC	1e-38	-89.07	0	921	0.1593	3727.6	0.1033
M04718_2.00:EHF:ELF1:ELF2:ELF3:ELF4:ELF5:ELK1:ELK3:ELK4:ERF:ERG:ETS1:ETS2:ETV1:ETV2:ETV3:ETV3L:ETV4:ETV5:ETV6:ETV7:FEV:FLI1:GABPA:SPDEF	AAMCAGGAAGTR	1e-38	-87.57	0	327	0.0566	918.3	0.0254
M08397_2.00:SCRT1:SCRT2	AWKCAACAGGTG	1e-37	-87.24	0	199	0.0344	425.6	0.0118
M09536_2.00:ELF1:ELF2:ELF4:ELK1:ELK3:ELK4:ERF:ERG:ETS1:ETS2:ETV1:ETV2:ETV3:ETV3L:ETV4:ETV5:FEV:FLI1:GABPA	ACAGGAAGTG	1e-37	-87.14	0	885	0.1531	3562.8	0.0987
M06200_2.00:FOXD1:FOXD2:FOXD3:FOXD4:FOXD4L1:FOXD4L3:FOXD4L4:FOXD4L5:FOXD4L6:FOXE1:FOXF1:FOXF2:FOXL1	RTAAACA	1e-37	-86.87	0	1365	0.2361	6115.4	0.1694
M09865_2.00:ARNT:ARNT2	YRCGTGSS	1e-37	-86.39	0	1695	0.2932	7959.4	0.2205
M09869_2.00:USF1:USF2	CCACGTGH	1e-37	-86.33	0	2223	0.3845	11006.1	0.3049
M08003_2.00:RELA	AGGGGATTTCCMVV	1e-37	-85.83	0	188	0.0325	391.6	0.0108
M10472_2.00:ELF5:SPI1:SPIB:SPIC	NNCHTYYACTTCCTCTTTT	1e-37	-85.54	0	179	0.031	361.1	0.01
M09081_2.00:ELF1:ELF2:ELF4:ELK1:ELK3:ELK4:ERF:ERG:ETS1:ETS2:ETV1:ETV2:ETV3:ETV3L:ETV4:ETV5:ETV6:FEV:FLI1:GABPA	RRACMGGAAGYGRV	1e-36	-85.06	0	680	0.1176	2553.1	0.0707
M04392_2.00:SNAI2	TGCACCTGTY	1e-36	-84.73	0	557	0.0964	1963.1	0.0544
M08001_2.00:RELA	NRGGGRMTTTCCMVR	1e-36	-84.39	0	187	0.0323	392.8	0.0109
M09535_2.00:ELF1:ELF2:ELF4:ELK1:ELK3:ELK4:ERF:ERG:ETS1:ETS2:ETV1:ETV2:ETV3:ETV3L:ETV4:ETV5:FEV:FLI1:GABPA	RACCGGAAGT	1e-36	-83.9	0	618	0.1069	2261.6	0.0626
M04724_2.00:EHF:ELF1:ELF2:ELF3:ELF4:ELF5:ELK1:ELK3:ELK4:ERF:ERG:ETS1:ETS2:ETV1:ETV2:ETV3:ETV3L:ETV4:ETV5:ETV6:ETV7:FEV:FLI1:GABPA:SPDEF	AAMCAGGAAGTR	1e-36	-83.63	0	357	0.0618	1065.3	0.0295
M05078_2.00:HOXA10:HOXA11:HOXA9:HOXB9:HOXC10:HOXC11:HOXC12:HOXC9:HOXD10:HOXD11:HOXD12:HOXD9	KTTTTATKRCY	1e-36	-83.51	0	1137	0.1967	4924	0.1364
M08389_2.00:ZBTB12	CTAGAACCY	1e-36	-82.9	0	818	0.1415	3263.2	0.0904
M05106_2.00:HOXA10:HOXA11:HOXA5:HOXA6:HOXA7:HOXA9:HOXB5:HOXB6:HOXB8:HOXB9:HOXC10:HOXC11:HOXC5:HOXC6:HOXC8:HOXC9:HOXD10:HOXD11:HOXD8:HOXD9	GTTTTATKGC	1e-35	-82.7	0	999	0.1728	4201.8	0.1164
M09158_2.00:ALX1:ALX3:ALX4:ARX:BARHL1:BARHL2:BARX1:BARX2:BSX:DRGX:EMX1:EMX2:EN1:EN2:ESX1:EVX1:EVX2:GBX1:GBX2:GSX1:GSX2:HESX1:HOXA1:HOXA2:HOXA3:HOXA4:HOXA5:HOXB1:HOXB2:HOXB3:HOXB4:HOXB5:HOXC4:HOXC5:HOXD1:HOXD3:HOXD4:LBX1:MEOX1:MEOX2:MIXL1:MNX1:MSX1:MSX2:NANOG:NANOGP8:NKX1-1:NKX1-2:PDX1:PHOX2A:PHOX2B:PROP1:PRRX1:PRRX2:RAX:RAX2:SHOX:SHOX2:TLX1:TLX3:UNCX:VAX1:VAX2:VENTX:VSX1:VSX2	KTTTTATKGCYYT	1e-35	-82.56	0	601	0.104	2190.2	0.0607
M08166_2.00:SOX1:SOX10:SOX11:SOX12:SOX13:SOX14:SOX15:SOX17:SOX18:SOX2:SOX21:SOX3:SOX30:SOX4:SOX5:SOX6:SOX7:SOX8:SOX9:SRY	DAACAATGGNN	1e-35	-82.29	0	1425	0.2465	6507.6	0.1803
M01985_2.00:FOXC1:FOXC2:FOXD1:FOXD2:FOXD3:FOXD4:FOXD4L1:FOXD4L3:FOXD4L4:FOXD4L5:FOXD4L6:FOXE1:FOXG1:FOXI1:FOXI2:FOXI3:FOXJ3:FOXK2:FOXL1:FOXL2:FOXS1	GTAAACAA	1e-35	-82.05	0	1162	0.201	5075.7	0.1406
M07999_2.00:RELA	AGGGRMTTTCCMVR	1e-35	-81.97	0	195	0.0337	428.3	0.0119
M10414_2.00:RBPJ	TTCCCACG	1e-35	-81.91	0	847	0.1465	3421.9	0.0948
M05080_2.00:HOXA10:HOXA11:HOXA9:HOXB9:HOXC10:HOXC11:HOXC12:HOXC9:HOXD10:HOXD11:HOXD12:HOXD9	DTTTTATKGCY	1e-35	-81.75	0	1004	0.1737	4238.4	0.1174
M03167_2.00:HMBOX1:HNF1A:HNF1B	STTAACTARK	1e-35	-81.55	0	622	0.1076	2300.7	0.0637
M02814_2.00:ASCL1:ASCL2	ARCAGCTGCT	1e-35	-81.51	0	599	0.1036	2189.6	0.0607
M08002_2.00:RELA	AGGGRMTTTCCMVVS	1e-35	-80.93	0	177	0.0306	368.2	0.0102
M03050_2.00:FOXO1:FOXO3:FOXO4:FOXO6:FOXP4	GTAAACA	1e-35	-80.71	0	1234	0.2135	5481.3	0.1518
M08745_2.00:MYF5:MYOD1:MYOG	GRCAGVRACAGCTGC	1e-34	-80.57	0	374	0.0647	1156.9	0.032
M04223_2.00:OLIG2:OLIG3	AACAGCTGTT	1e-34	-79.22	0	495	0.0856	1713.4	0.0475
M08007_2.00:RELA	AGGGRATTTCCAV	1e-34	-78.99	0	198	0.0343	449.8	0.0125
M03008_2.00:SPI1:SPIB:SPIC	AAAAAGCGGAAGTA	1e-34	-78.94	0	87	0.015	101.1	0.0028
M08395_2.00:ZNF260	GCTSYVTHCTHYTCC	1e-33	-77.95	0	901	0.1559	3742.9	0.1037
M08005_2.00:RELA	NAGGGRATTTCCAVN	1e-33	-77.5	0	183	0.0317	400.2	0.0111
M06297_2.00:CRX:DMBX1:DPRX:GSC:GSC2:OTX1:OTX2:PITX1:PITX2:PITX3:TPRX1	VTTAATCC	1e-33	-77.44	0	1256	0.2173	5644.5	0.1563
M08577_2.00:HSF2:HSF4	TTCTAGAA	1e-33	-77.33	0	853	0.1476	3500.6	0.097
M09152_2.00:CDX1:CDX2:CDX4	TTTTATTGCTKT	1e-33	-76.85	0	617	0.1067	2316.1	0.0642
M08008_2.00:RELA	RGGGGATTTCCMVVS	1e-33	-76.47	0	173	0.0299	368.3	0.0102
M08267_2.00:ZNF71	CAGTTTCRTTTTCC	1e-33	-76.27	0	112	0.0194	172	0.0048
M09193_2.00:CDX1:CDX2:CDX4	TTTTATKGCYTT	1e-33	-76.23	0	588	0.1017	2180.1	0.0604
M09101_2.00:FOXP1:FOXP2:FOXP3:FOXP4	WGTAAACAV	1e-33	-76.15	0	2068	0.3577	10269.3	0.2844
M05864_2.00:ELF1:ELF2:ELF4:ELK1:ELK3:ELK4:ERF:ERG:ETS1:ETS2:ETV1:ETV2:ETV3:ETV3L:ETV4:ETV5:FEV:FLI1:GABPA	ACCGGAARTR	1e-33	-76.09	0	514	0.0889	1826.4	0.0506
M00114_2.00:TFAP2A:TFAP2B:TFAP2C:TFAP2D:TFAP2E	THGCCTSAGG	1e-32	-75.85	0	1543	0.2669	7259.3	0.2011
M01495_2.00:ELF1:ELF2:ELF4:ELK1:ELK3:ELK4:ERF:ERG:ETS1:ETS2:ETV1:ETV2:ETV3:ETV3L:ETV4:ETV5:ETV6:FEV:FLI1:GABPA	NACCGGAARY	1e-32	-75.76	0	1722	0.2979	8275.1	0.2292
M08710_2.00:TCF12:TCF3:TCF4	CACAGCTGCAG	1e-32	-75.7	0	1143	0.1977	5053.8	0.14
M09407_2.00:LEF1:TCF7:TCF7L1:TCF7L2	CTGCAGCTGTG	1e-32	-75.7	0	1143	0.1977	5053.8	0.14
M04207_2.00:ASCL1:ASCL2	VGCAGCTGCB	1e-32	-75.55	0	1302	0.2252	5922.9	0.1641
M09057_2.00:ELF1:ELF2:ELF4:ELK1:ELK3:ELK4:ERF:ERG:ETS1:ETS2:ETV1:ETV2:ETV3:ETV3L:ETV4:ETV5:FEV:FLI1:GABPA	RGRCAGGAAGYGG	1e-32	-75.15	0	811	0.1403	3307.2	0.0916
M09433_2.00:TBP:TBPL2	CTATAAAARS	1e-32	-75.13	0	1039	0.1797	4502.3	0.1247
M01482_2.00:ELF1:ELF2:ELF4:ELK1:ELK3:ELK4:ERF:ERG:ETS1:ETS2:ETV1:ETV2:ETV3:ETV3L:ETV4:ETV5:FEV:FLI1:GABPA	ACCGGAAGT	1e-32	-75.02	0	490	0.0848	1721.9	0.0477
M04548_2.00:ZBTB26	NTTTTCTRGAKB	1e-32	-74.72	0	764	0.1322	3071	0.0851
M03253_2.00:HOXA10:HOXA11:HOXA6:HOXA9:HOXB6:HOXB8:HOXB9:HOXC10:HOXC11:HOXC12:HOXC6:HOXC8:HOXC9:HOXD10:HOXD11:HOXD12:HOXD8:HOXD9	TTTTTATTRC	1e-32	-74.51	0	940	0.1626	3985.2	0.1104
M08714_2.00:LYL1:TAL1:TAL2	SAGGAAACAGCTGG	1e-32	-74.41	0	511	0.0884	1825.4	0.0506
M08763_2.00:LYL1:TAL1:TAL2	SAGGAAACAGCTGG	1e-32	-74.41	0	511	0.0884	1825.4	0.0506
M04770_2.00:ELF1:ELF2:ELF4:ELK1:ELK3:ELK4:ERF:ERG:ETS1:ETS2:ETV1:ETV2:ETV3:ETV3L:ETV4:ETV5:FEV:FLI1:GABPA	NACCGGAARTV	1e-32	-74.35	0	459	0.0794	1581.6	0.0438
M08000_2.00:RELA	HAGGGRATTTCCAV	1e-32	-74.16	0	196	0.0339	459.5	0.0127
M05876_2.00:NR1H2:NR1H3:NR1H4:NR2C1:NR2C2:NR2F1:NR2F2:NR2F6:RARA:RARB:RARG:RORA:RORB:RORC:RXRA:RXRB:RXRG:VDR	KAGGTCAWHKD	1e-32	-73.77	0	1357	0.2347	6251.2	0.1732
M01976_2.00:FOXC2:FOXJ3:FOXK2:FOXP1:FOXP2:FOXP3:FOXP4	GTAAACAA	1e-31	-73.67	0	1156	0.2	5150.1	0.1427
M04136_2.00:ASCL1:ASCL2	RGCAGCTGCH	1e-31	-72.39	0	1333	0.2306	6138.1	0.17
M05865_2.00:ELF1:ELF2:ELF4:ELK1:ELK3:ELK4:ERF:ERG:ETS1:ETS2:ETV1:ETV2:ETV3:ETV3L:ETV4:ETV5:FEV:FLI1:GABPA	ACCGGAAGTDN	1e-31	-72.39	0	507	0.0877	1822.3	0.0505
M08004_2.00:RELA	HAGGGRMTTTCCMRR	1e-31	-72.13	0	176	0.0304	393.8	0.0109
M09572_2.00:CDX1:CDX2:CDX4	DTTTTATKRC	1e-31	-71.87	0	967	0.1673	4159	0.1152
M04684_2.00:DMRT1:DMRT2:DMRT3:DMRTA2:DMRTB1:DMRTC2	NATGTAGCRATT	1e-31	-71.87	0	599	0.1036	2272	0.0629
M09594_2.00:IRF1:IRF2	GAAAGTGAAAGT	1e-31	-71.59	0	226	0.0391	585	0.0162
M08230_2.00:STAT1	AGTTTCRKTT	1e-31	-71.46	0	274	0.0474	779.2	0.0216
M01842_2.00:JUN:JUNB:JUND	ATGACKCAH	1e-30	-71.23	0	1984	0.3432	9864.8	0.2732
M09387_2.00:SOX1:SOX10:SOX11:SOX12:SOX13:SOX14:SOX15:SOX17:SOX18:SOX2:SOX21:SOX3:SOX30:SOX4:SOX5:SOX6:SOX7:SOX8:SOX9:SRY	MAAAGGRDSCWTTGTT	1e-30	-70.96	0	156	0.027	326.9	0.0091
M09403_2.00:SOX1:SOX10:SOX11:SOX12:SOX13:SOX14:SOX15:SOX17:SOX18:SOX2:SOX21:SOX3:SOX30:SOX4:SOX5:SOX6:SOX7:SOX8:SOX9:SRY	MAAAGGRDSCWTTGTT	1e-30	-70.96	0	156	0.027	326.9	0.0091
M10474_2.00:ELF5:SPI1:SPIB:SPIC	AAAAWGVGGAAGTRGNG	1e-30	-70.51	0	129	0.0223	237.7	0.0066
M08027_2.00:ELF5:SPI1:SPIB:SPIC	AAAAAGAGGAAGTGR	1e-30	-70.41	0	215	0.0372	546.9	0.0151
M05119_2.00:HOXA10:HOXA11:HOXA6:HOXA9:HOXB6:HOXB8:HOXB9:HOXC10:HOXC11:HOXC12:HOXC6:HOXC8:HOXC9:HOXD10:HOXD11:HOXD12:HOXD8:HOXD9	GGTAATAAAAH	1e-30	-70.18	0	521	0.0901	1907.5	0.0528
M04792_2.00:EHF:ELF1:ELF2:ELF4:ELK1:ELK3:ELK4:ERF:ERG:ETS1:ETS2:ETV1:ETV2:ETV3:ETV3L:ETV4:ETV5:FEV:FLI1:GABPA	RACCGGAAGTG	1e-30	-69.55	0	382	0.0661	1261.7	0.0349
M08322_2.00:ZNF513	ACCATCATCAYCATC	1e-30	-69.45	0	92	0.0159	130	0.0036
M06140_2.00:SCRT1:SCRT2	CCACCTGTTGMNY	1e-29	-68.77	0	288	0.0498	852.9	0.0236
M01486_2.00:ELF1:ELF2:ELF4:ELK1:ELK3:ELK4:ERF:ERG:ETS1:ETS2:ETV1:ETV2:ETV3:ETV3L:ETV4:ETV5:FEV:FLI1:GABPA	NACCGGAARY	1e-29	-68.64	0	1742	0.3013	8508	0.2357
M02735_2.00:ELF1:ELF2:ELF4:ELK1:ELK3:ELK4:ERF:ERG:ETS1:ETS2:ETV1:ETV2:ETV3:ETV3L:ETV4:ETV5:FEV:FLI1:GABPA	ACCGGAAGT	1e-29	-68.42	0	299	0.0517	901.9	0.025
M04769_2.00:ELF1:ELF2:ELF4:ELK1:ELK3:ELK4:ERF:ERG:ETS1:ETS2:ETV1:ETV2:ETV3:ETV3L:ETV4:ETV5:FEV:FLI1:GABPA	RACCGGAAGTN	1e-29	-68.35	0	348	0.0602	1116.1	0.0309
M09674_2.00:CDX1:CDX2:CDX4:HOXA13:HOXC13	TTTTATGRYY	1e-29	-68.01	0	1566	0.2709	7512.8	0.2081
M01980_2.00:FOXI1:FOXI2:FOXI3:FOXJ1:FOXJ2:FOXJ3:FOXK2:FOXP3	RTAAACAA	1e-29	-67.91	0	1240	0.2145	5689.1	0.1576
M01984_2.00:FOXC1:FOXC2:FOXD1:FOXD2:FOXD3:FOXD4:FOXD4L1:FOXD4L3:FOXD4L4:FOXD4L5:FOXD4L6:FOXE1:FOXE3:FOXF1:FOXF2:FOXG1:FOXI1:FOXI3:FOXL1:FOXL2:FOXS1	NATRTAAACAHA	1e-29	-67.73	0	1139	0.197	5138.8	0.1423
M04767_2.00:ELF1:ELF2:ELF4:ELK1:ELK3:ELK4:ERF:ERG:ETS1:ETS2:ETV1:ETV2:ETV3:ETV3L:ETV4:ETV5:FEV:FLI1:GABPA	GACCGGAAGTV	1e-29	-67.47	0	394	0.0682	1330.5	0.0369
M05290_2.00:HOXA10:HOXA11:HOXA5:HOXA6:HOXA7:HOXA9:HOXB5:HOXB6:HOXB8:HOXB9:HOXC10:HOXC11:HOXC5:HOXC6:HOXC8:HOXC9:HOXD10:HOXD11:HOXD8:HOXD9	DTTTTATTGC	1e-29	-67.18	0	978	0.1692	4276.6	0.1185
M02992_2.00:ELF1:ELF2:ELF4:ELK1:ELK3:ELK4:ERF:ERG:ETS1:ETS2:ETV1:ETV2:ETV3:ETV3L:ETV4:ETV5:FEV:FLI1:GABPA	ACCGGAARTV	1e-29	-67.14	0	333	0.0576	1057.4	0.0293
M02983_2.00:ELF1:ELF2:ELF4:ELK1:ELK3:ELK4:ERF:ERG:ETS1:ETS2:ETV1:ETV2:ETV3:ETV3L:ETV4:ETV5:FEV:FLI1:GABPA	ACCGGAAGTR	1e-29	-67.06	0	341	0.059	1093.6	0.0303
M05334_2.00:HOXA10:HOXA11:HOXA5:HOXA6:HOXA7:HOXA9:HOXB5:HOXB6:HOXB8:HOXB9:HOXC10:HOXC11:HOXC5:HOXC6:HOXC8:HOXC9:HOXD10:HOXD11:HOXD8:HOXD9	DTTTTATTRC	1e-29	-66.97	0	993	0.1718	4359.1	0.1207
M03134_2.00:HOXA10:HOXA11:HOXA9:HOXB9:HOXC10:HOXC11:HOXC12:HOXC9:HOXD10:HOXD11:HOXD12:HOXD9	KTTTTATKGCY	1e-28	-66.53	0	1013	0.1752	4472.1	0.1239
M09060_2.00:EHF:ELF1:ELF2:ELF3:ELF4:ELF5:ETV6:ETV7	RAACVAGGAAGTRG	1e-28	-65.87	0	346	0.0599	1123.7	0.0311
M09066_2.00:EHF:ELF1:ELF2:ELF3:ELF4:ELF5:ETV6:ETV7	RAACVAGGAAGTRG	1e-28	-65.87	0	346	0.0599	1123.7	0.0311
M03781_2.00:CDX1:CDX2:CDX4:HOXA13:HOXC13	NTTTTATGACCY	1e-28	-65.83	0	574	0.0993	2204.1	0.0611
M09351_2.00:RELA	MAGGGAATTTCCMV	1e-28	-65.53	0	168	0.0291	387.1	0.0107
M04185_2.00:MSC:TCF21	NAACAGCTGTTR	1e-28	-64.93	0	563	0.0974	2158.7	0.0598
M02681_2.00:FOXC1:FOXC2:FOXD1:FOXD2:FOXD3:FOXD4:FOXD4L1:FOXD4L3:FOXD4L4:FOXD4L5:FOXD4L6:FOXE1:FOXE3:FOXF1:FOXF2:FOXG1:FOXI1:FOXI3:FOXJ3:FOXL1:FOXL2:FOXS1	GTAAACAW	1e-28	-64.85	0	1101	0.1905	4971.5	0.1377
M04655_2.00:SCRT1:SCRT2	HGCAACAGGTG	1e-27	-64.47	0	222	0.0384	600.6	0.0166
M09183_2.00:CRX:DMBX1:DPRX:GSC:GSC2:OTX1:OTX2:PITX1:PITX2:PITX3:TPRX1	TTAATCCYYTTA	1e-27	-63.8	0	444	0.0768	1592	0.0441
M00112_2.00:TFAP2A:TFAP2B:TFAP2C:TFAP2D:TFAP2E	CCTSAGGCNA	1e-27	-63.63	0	1332	0.2304	6264.7	0.1735
M04839_2.00:FOXC1:FOXC2:FOXD1:FOXD2:FOXD3:FOXD4:FOXD4L1:FOXD4L3:FOXD4L4:FOXD4L5:FOXD4L6:FOXE1:FOXG1:FOXI1:FOXI2:FOXI3:FOXJ3:FOXK2:FOXL1:FOXL2:FOXS1	VACRCAAACAC	1e-27	-63.61	0	1727	0.2987	8508.3	0.2357
M09344_2.00:NFKB1:NFKB2	GGGRCTTYCCC	1e-27	-63.54	0	384	0.0664	1312.9	0.0364
M09356_2.00:NFKB1:NFKB2	GGGRCTTYCCC	1e-27	-63.54	0	384	0.0664	1312.9	0.0364
M04656_2.00:SCRT1:SCRT2	NGCAACAGGTG	1e-27	-63.5	0	245	0.0424	699	0.0194
M03135_2.00:HOXA10:HOXA11:HOXC10:HOXC11:HOXC12:HOXD10:HOXD11:HOXD12:MEOX1	TTTTATTAC	1e-27	-62.22	0	943	0.1631	4153.9	0.1151
M08006_2.00:RELA	GGGRATTTCCM	1e-26	-62.15	0	267	0.0462	799.8	0.0222
M04756_2.00:EHF:ELF1:ELF2:ELF3:ELF4:ELF5:ETV6:ETV7:SPI1:SPIC	NABGMGGAAGTR	1e-26	-61.66	0	1286	0.2225	6038.7	0.1673
M02963_2.00:EBF1	AKTCCCTDGGGAAT	1e-26	-61.58	0	100	0.0173	168	0.0047
M02997_2.00:ELF1:ELF2:ELF4:ELK1:ELK3:ELK4:ERF:ERG:ETS1:ETS2:ETV1:ETV2:ETV3:ETV3L:ETV4:ETV5:FEV:FLI1:GABPA	ACCGGAARTV	1e-26	-61.21	0	290	0.0502	904.2	0.025
M09546_2.00:FOXH1	SSAATCCACANN	1e-26	-60.86	0	794	0.1373	3380.2	0.0936
M02991_2.00:ELF1:ERF:ETV6	MGCGGAAGTG	1e-26	-60.77	0	382	0.0661	1323.7	0.0367
M03773_2.00:HOXA10:HOXA11:HOXA6:HOXA9:HOXB6:HOXB8:HOXB9:HOXC10:HOXC11:HOXC12:HOXC5:HOXC6:HOXC8:HOXC9:HOXD10:HOXD11:HOXD12:HOXD8:HOXD9	DTTTTATTRCY	1e-26	-60.44	0	633	0.1095	2553.9	0.0707
M05770_2.00:SOX1:SOX10:SOX11:SOX12:SOX13:SOX14:SOX15:SOX17:SOX18:SOX2:SOX21:SOX3:SOX30:SOX4:SOX5:SOX6:SOX7:SOX8:SOX9:SRY	CCATTGTTMN	1e-26	-60.36	0	1613	0.279	7910.2	0.2191
M04116_2.00:MYF5:MYOD1:MYOG	BAACAGCTGTTR	1e-26	-60.2	0	517	0.0894	1975.9	0.0547
M06201_2.00:FOXP1:FOXP2:FOXP3:FOXP4	RRTAAACAA	1e-26	-60.16	0	1188	0.2055	5517.7	0.1528
M04725_2.00:EHF:ELF1:ELF2:ELF3:ELF4:ELF5:ELK1:ELK3:ELK4:ERF:ERG:ETS1:ETS2:ETV1:ETV2:ETV3:ETV3L:ETV4:ETV5:ETV6:ETV7:FEV:FLI1:GABPA:SPDEF	RAYGCGGAAGTR	1e-26	-60.14	0	237	0.041	683.2	0.0189
M04719_2.00:EHF:ELF1:ELF2:ELF3:ELF4:ELF5:ELK1:ELK3:ELK4:ERF:ERG:ETS1:ETS2:ETV1:ETV2:ETV3:ETV3L:ETV4:ETV5:ETV6:ETV7:FEV:FLI1:GABPA:SPDEF	RAYGCGGAAGTR	1e-25	-59.81	0	318	0.055	1037.4	0.0287
M09048_2.00:ELF1:ELF2:ELF4:ELK1:ELK3:ELK4:ERF:ERG:ETS1:ETS2:ETV1:ETV2:ETV3:ETV3L:ETV4:ETV5:FEV:FLI1:GABPA	RRARACAGGAARTRGS	1e-25	-59.78	0	185	0.032	474.2	0.0131
M09067_2.00:ELF1:ELF2:ELF4:ELK1:ELK3:ELK4:ERF:ERG:ETS1:ETS2:ETV1:ETV2:ETV3:ETV3L:ETV4:ETV5:FEV:FLI1:GABPA	RRARACAGGAARTRGS	1e-25	-59.78	0	185	0.032	474.2	0.0131
M03237_2.00:CRX:DMBX1:DPRX:GSC:GSC2:OTX1:OTX2:PITX1:PITX2:PITX3:TPRX1	GHTAATCCBN	1e-25	-59.54	0	1397	0.2417	6695.3	0.1855
M09657_2.00:TWIST1:TWIST2	AACATRTGYBRR	1e-25	-58.99	0	704	0.1218	2933.9	0.0813
M03247_2.00:HOXA13:HOXB13:HOXC13:HOXD13	DTTTTATTRG	1e-25	-58.92	0	1067	0.1846	4870.3	0.1349
M00157_2.00:ELF1:ELF2:ELF4:ELK1:ELK3:ELK4:ERF:ERG:ETS1:ETS2:ETV1:ETV2:ETV3:ETV3L:ETV4:ETV5:FEV:FLI1:GABPA	NACCGGAAGT	1e-25	-58.87	0	423	0.0732	1531.2	0.0424
M01487_2.00:ELF1:ELF2:ELF4:ELK1:ELK3:ELK4:ERF:ERG:ETS1:ETS2:ETV1:ETV2:ETV3:ETV3L:ETV4:ETV5:FEV:FLI1:GABPA	NACCGGAAGT	1e-25	-58.68	0	569	0.0984	2248.9	0.0623
M04759_2.00:EHF:ELF1:ELF2:ELF3:ELF4:ELF5:ETV6:ETV7:SPI1:SPIC	AASGAGGAAGTR	1e-25	-58.64	0	427	0.0739	1552.9	0.043
M03086_2.00:HOXA10:HOXA11:HOXA5:HOXA6:HOXA7:HOXA9:HOXB5:HOXB6:HOXB8:HOXB9:HOXC10:HOXC11:HOXC5:HOXC6:HOXC8:HOXC9:HOXD10:HOXD11:HOXD8:HOXD9	DTTTTATTRCY	1e-25	-58.63	0	1128	0.1951	5209.3	0.1443
M02988_2.00:EHF:ELF1:ELF2:ELF3:ELF4:ELF5:ETV6:ETV7:SPI1:SPIC	ACCCGGAAGTD	1e-25	-58.47	0	424	0.0733	1539.3	0.0426
M04743_2.00:EHF:ELF1:ELF2:ELF3:ELF4:ELF5:ELK1:ELK3:ELK4:ERF:ERG:ETS1:ETS2:ETV1:ETV2:ETV3:ETV3L:ETV4:ETV5:ETV6:ETV7:FEV:FLI1:GABPA:SPDEF	RABSCGGAAGTG	1e-25	-58.34	0	456	0.0789	1694.3	0.0469
M01498_2.00:MAX	CCACGTGN	1e-25	-58.16	0	2562	0.4432	13563.1	0.3757
M10890_2.00:IRF4:IRF8	RAARTGAAACTG	1e-25	-58.06	0	141	0.0244	315.9	0.0088
M10833_2.00:POU2F1	TATGCAAATN	1e-25	-57.9	0	423	0.0732	1539.5	0.0426
M04774_2.00:ELF1:ELF2:ELF4:ELK1:ELK3:ELK4:ERF:ERG:ETS1:ETS2:ETV1:ETV2:ETV3:ETV3L:ETV4:ETV5:FEV:FLI1:GABPA	NACCGGAARTS	1e-25	-57.82	0	278	0.0481	872.9	0.0242
M01485_2.00:ELF1:ELF2:ELF4:ELK1:ELK3:ELK4:ERF:ERG:ETS1:ETS2:ETV1:ETV2:ETV3:ETV3L:ETV4:ETV5:FEV:FLI1:GABPA	ACCGGAAGT	1e-25	-57.77	0	618	0.1069	2505.3	0.0694
M04720_2.00:ELF1:ELF2:ELF4:ELK1:ELK3:ELK4:ERF:ERG:ETS1:ETS2:ETV1:ETV2:ETV3:ETV3L:ETV4:ETV5:FEV:FLI1:GABPA	NACCGGAAGTR	1e-25	-57.69	0	259	0.0448	790.3	0.0219
M10493_2.00:ELF1:ELF2:ELF4:ELK1:ELK3:ELK4:ERF:ERG:ETS1:ETS2:ETV1:ETV2:ETV3:ETV3L:ETV4:ETV5:FEV:FLI1:GABPA	ACCGGAAGYV	1e-25	-57.68	0	1139	0.197	5284.8	0.1464
M09808_2.00:HIF1A	SBACGTGCV	1e-24	-57.48	0	1670	0.2889	8290.7	0.2296
M08170_2.00:SOX1:SOX10:SOX11:SOX12:SOX13:SOX14:SOX15:SOX17:SOX18:SOX2:SOX21:SOX3:SOX30:SOX4:SOX5:SOX6:SOX7:SOX8:SOX9:SRY	CCWTTGTT	1e-24	-57.42	0	759	0.1313	3238.9	0.0897
M09358_2.00:NFKB1:NFKB2	GGGAATTTCCC	1e-24	-57.11	0	248	0.0429	746.4	0.0207
M04172_2.00:OLIG2:OLIG3	AACAGCTGYT	1e-24	-56.93	0	705	0.122	2962.9	0.0821
M04122_2.00:MYF5:MYOD1:MYOG	BAACAGCTGTYV	1e-24	-56.87	0	490	0.0848	1873.3	0.0519
M00161_2.00:FOXJ1:FOXJ2	ARTAAACAAAYN	1e-24	-56.8	0	1050	0.1816	4809	0.1332
M05749_2.00:SOX1:SOX10:SOX11:SOX12:SOX13:SOX14:SOX15:SOX17:SOX18:SOX2:SOX21:SOX3:SOX30:SOX4:SOX5:SOX6:SOX7:SOX8:SOX9:SRY	AGAACAATRG	1e-24	-56.6	0	984	0.1702	4451.9	0.1233
M03004_2.00:EHF:ELF1:ELF2:ELF4:ELK1:ELK3:ELK4:ERF:ERG:ETS1:ETS2:ETV1:ETV2:ETV3:ETV3L:ETV4:ETV5:FEV:FLI1:GABPA	ACCGGAAGTN	1e-24	-56.21	0	254	0.0439	777.2	0.0215
M04799_2.00:ELF1:ELF2:ELF4:ELK1:ELK3:ELK4:ERF:ERG:ETS1:ETS2:ETV1:ETV2:ETV3:ETV3L:ETV4:ETV5:FEV:FLI1:GABPA	RACCGGAAGTR	1e-24	-56.07	0	312	0.054	1035.1	0.0287
M04210_2.00:ASCL1:ASCL2	VGCAGCTGCY	1e-24	-55.44	0	989	0.1711	4495.9	0.1245
M09626_2.00:RELA	WGGGGATTTCCC	1e-23	-55.16	0	241	0.0417	727.7	0.0202
M04120_2.00:MYF5:MYOD1:MYOG	BAACAGCTGTYV	1e-23	-55.13	0	459	0.0794	1737.3	0.0481
M08019_2.00:STAT2	TTHAGTTTCRKTTTC	1e-23	-55.07	0	127	0.022	275.2	0.0076
M04898_2.00:HOXA10:HOXA11:HOXA9:HOXB9:HOXC10:HOXC11:HOXC12:HOXC9:HOXD10:HOXD11:HOXD12:HOXD9	DTTTTATKRCY	1e-23	-54.95	0	1032	0.1785	4737.8	0.1312
M04716_2.00:EHF:ELF1:ELF2:ELF3:ELF4:ELF5:ELK1:ELK3:ELK4:ERF:ERG:ETS1:ETS2:ETV1:ETV2:ETV3:ETV3L:ETV4:ETV5:ETV6:ETV7:FEV:FLI1:GABPA:SPDEF	NAMSCGGAAGTR	1e-23	-54.84	0	211	0.0365	602.9	0.0167
M10246_2.00:SALL2	GGGTGGG	1e-23	-54.83	0	2325	0.4022	12204.3	0.338
M03209_2.00:HOXA10:HOXA11:HOXC10:HOXC11:HOXC12:HOXD10:HOXD11:HOXD12:MEOX2	TTTTATTAC	1e-23	-54.06	0	1093	0.1891	5086.4	0.1409
M02968_2.00:ELF1:ELF2:ELF4:ELK1:ELK3:ELK4:ERF:ERG:ETS1:ETS2:ETV1:ETV2:ETV3:ETV3L:ETV4:ETV5:FEV:FLI1:GABPA	ACCGGAAGTR	1e-23	-53.93	0	180	0.0311	480.6	0.0133
M09355_2.00:RELA	GGGAMTTTCCC	1e-23	-53.38	0	352	0.0609	1239.5	0.0343
M08420_2.00:CDX1:CDX2:CDX4:HOXA13:HOXC13	KTTTTATGGCY	1e-23	-52.99	0	607	0.105	2501.4	0.0693
M03470_2.00:RUNX1:RUNX2:RUNX3	WAACCGCAA	1e-23	-52.98	0	554	0.0958	2231.2	0.0618
M08724_2.00:MYF5:MYOD1:MYOG	GRCAGVRACAGCTGC	1e-22	-52.7	0	371	0.0642	1334.7	0.037
M00122_2.00:MAX	NNCACGTGB	1e-22	-52.07	0	2586	0.4473	13844.4	0.3835
M10529_2.00:FOXC1:FOXC2:FOXD1:FOXD2:FOXD3:FOXD4:FOXD4L1:FOXD4L3:FOXD4L4:FOXD4L5:FOXD4L6:FOXE1:FOXE3:FOXF1:FOXF2:FOXI1:FOXL1:FOXL2:FOXS1	ATGTTTAT	1e-22	-51.44	0	1263	0.2185	6077.8	0.1683
M09053_2.00:EHF:ELF1:ELF2:ELF3:ELF4:ELF5:ETV6:ETV7:FEV	RAACCAGGAAGTRGS	1e-22	-51.27	0	202	0.0349	583	0.0161
M09071_2.00:EHF:ELF1:ELF2:ELF3:ELF4:ELF5:ETV6:ETV7:FEV	RAACCAGGAAGTRGS	1e-22	-51.27	0	202	0.0349	583	0.0161
M08944_2.00:ZNF250	TACCATRCTGTTTTGRTTAC	1e-22	-51.26	0	55	0.0095	63	0.0017
M03284_2.00:HOXA10:HOXA11:HOXA5:HOXA6:HOXA7:HOXA9:HOXB5:HOXB6:HOXB8:HOXB9:HOXC10:HOXC11:HOXC5:HOXC6:HOXC8:HOXC9:HOXD10:HOXD11:HOXD8:HOXD9	TTTTACGAC	1e-22	-50.97	0	911	0.1576	4136.3	0.1146
M02999_2.00:ELF1:ELF2:ELF4:ELK1:ELK3:ELK4:ERF:ERG:ETS1:ETS2:ETV1:ETV2:ETV3:ETV3L:ETV4:ETV5:FEV:FLI1:GABPA	ACCGGAAGTG	1e-22	-50.93	0	233	0.0403	717.4	0.0199
M04197_2.00:BHLHA15	AACAGCTGTT	1e-22	-50.89	0	696	0.1204	2988.6	0.0828
M09458_2.00:TCF12:TCF3:TCF4	CARCAGCTGB	1e-22	-50.7	0	1061	0.1835	4962.6	0.1375
M02989_2.00:EHF:ELF1:ELF2:ELF3:ELF4:ELF5:ETV6:ETV7:SPI1:SPIC	ACCCGGAAGTD	1e-21	-50.54	0	539	0.0932	2181.7	0.0604
M03229_2.00:HOXA10:HOXA11:HOXA6:HOXA9:HOXB6:HOXB8:HOXB9:HOXC10:HOXC11:HOXC12:HOXC6:HOXC8:HOXC9:HOXD10:HOXD11:HOXD12:HOXD8:HOXD9	WTTTTATTRC	1e-21	-50.36	0	1440	0.2491	7101.8	0.1967
M09371_2.00:RUNX1:RUNX2:RUNX3	VAAACCACARM	1e-21	-50.21	0	678	0.1173	2902.9	0.0804
M03011_2.00:EHF:ELF1:ELF2:ELF3:ELF4:ELF5:ETV6:ETV7:SPI1:SPIC	ACCCGGAAGTD	1e-21	-49.28	0	636	0.11	2694.2	0.0746
M04168_2.00:ATOH1	AACAGCTGTC	1e-21	-49.19	0	388	0.0671	1445.2	0.04
M05083_2.00:HOXA10:HOXA11:HOXC10:HOXC11:HOXC12:HOXD10:HOXD11:HOXD12:MEOX1	GGTAATAAAAH	1e-21	-49.05	0	548	0.0948	2243.3	0.0621
M09596_2.00:IRF1:IRF2	GAAASYGAAASY	1e-21	-48.9	0	810	0.1401	3620.7	0.1003
M08285_2.00:ZNF184	TCCTCACCA	1e-20	-47.93	0	740	0.128	3259.8	0.0903
M08186_2.00:BACH1:BACH2	TCAGCADTT	1e-20	-47.47	0	640	0.1107	2737.7	0.0758
M10522_2.00:FOXP3	ATAAACAA	1e-20	-47.33	0	1644	0.2844	8337.2	0.2309
M10519_2.00:SPI1:SPIB:SPIC	AAAAAGMGGAAGTWNCW	1e-20	-47.2	0	70	0.0121	110.9	0.0031
M04757_2.00:EHF:ELF1:ELF2:ELF3:ELF4:ELF5:ETV6:ETV7:SPI1:SPIC	AACVAGGAAGTR	1e-20	-47.2	0	463	0.0801	1833.9	0.0508
M03009_2.00:ELF5:ETV7:SPI1:SPIB:SPIC	AAAAAGMGGAAGTA	1e-20	-47.03	0	58	0.01	77.1	0.0021
M03465_2.00:RUNX1:RUNX2:RUNX3	AAACCGCAAA	1e-20	-46.94	0	397	0.0687	1509.5	0.0418
M05767_2.00:SOX1:SOX10:SOX11:SOX12:SOX13:SOX14:SOX15:SOX17:SOX18:SOX2:SOX21:SOX3:SOX30:SOX4:SOX5:SOX6:SOX7:SOX8:SOX9:SRY	MGAACAATRG	1e-20	-46.68	0	891	0.1541	4091.6	0.1133
M08232_2.00:ZNF200	ACTTCC	1e-20	-46.44	0	2300	0.3979	12243.6	0.3391
M01986_2.00:FOXC1:FOXC2:FOXD1:FOXD2:FOXD3:FOXD4:FOXD4L1:FOXD4L3:FOXD4L4:FOXD4L5:FOXD4L6:FOXE1:FOXG1:FOXI1:FOXI2:FOXI3:FOXJ3:FOXK2:FOXL1:FOXL2:FOXS1	TGTAAACAAN	1e-20	-46.37	0	1270	0.2197	6207.4	0.1719
M04118_2.00:MYF5:MYOD1:MYOG	BAACAGCTGTYV	1e-20	-46.15	0	473	0.0818	1894	0.0525
M01481_2.00:ELF1:ELF2:ELF4:ELK1:ELK3:ELK4:ERF:ERG:ETS1:ETS2:ETV1:ETV2:ETV3:ETV3L:ETV4:ETV5:FEV:FLI1:GABPA	NRCCGGAAGT	1e-19	-46.02	0	578	0.1	2432.3	0.0674
M00146_2.00:ZBTB12	NGTTCTAGAY	1e-19	-45.94	0	997	0.1725	4685.7	0.1298
M10481_2.00:ELF1:ELF2:ELF4:ELK1:ELK3:ELK4:ERF:ERG:ETS1:ETS2:ETV1:ETV2:ETV3:ETV3L:ETV4:ETV5:FEV:FLI1:GABPA	CMGGAARTR	1e-19	-45.88	0	1010	0.1747	4758.3	0.1318
M08730_2.00:ASCL1:ASCL2	CYGCACCTGCYBCY	1e-19	-45.28	0	674	0.1166	2944.3	0.0816
M09866_2.00:ARNT:ARNT2	CACGTA	1e-19	-45.11	0	1982	0.3428	10372.3	0.2873
M08191_2.00:PRDM1	ACTTTCAC	1e-19	-44.64	0	1290	0.2231	6353.1	0.176
M11242_2.00:RELA	GGGAMTTTCCCN	1e-19	-44.51	0	410	0.0709	1596.4	0.0442
M04722_2.00:EHF:ELF1:ELF2:ELF3:ELF4:ELF5:ELK1:ELK3:ELK4:ERF:ERG:ETS1:ETS2:ETV1:ETV2:ETV3:ETV3L:ETV4:ETV5:ETV6:ETV7:FEV:FLI1:GABPA:SPDEF	NAMSCGGAAGTR	1e-19	-44.33	0	197	0.0341	600.6	0.0166
M09372_2.00:RUNX1:RUNX2:RUNX3	VAAACCACARRV	1e-19	-44.07	0	565	0.0977	2388.1	0.0661
M09539_2.00:ELF1:ELF2:ELF4:ELK1:ELK3:ELK4:ERF:ERG:ETS1:ETS2:ETV1:ETV2:ETV3:ETV3L:ETV4:ETV5:FEV:FLI1:GABPA	DCCGGAARYN	1e-19	-43.96	0	2028	0.3508	10672.2	0.2956
M09049_2.00:EHF:ELF1:ELF2:ELF3:ELF4:ELF5:ELK1:ELK3:ELK4:ERF:ERG:ETS1:ETS2:ETV1:ETV2:ETV3:ETV3L:ETV4:ETV5:ETV6:ETV7:FEV:FLI1:GABPA:SPDEF	RAVCCGGAAGTGR	1e-19	-43.85	0	283	0.049	990.3	0.0274
M03132_2.00:HOXA10:HOXA11:HOXA9:HOXB9:HOXC10:HOXC11:HOXC12:HOXC9:HOXD10:HOXD11:HOXD12:HOXD9	DTTTTATTRCY	1e-19	-43.85	0	1246	0.2155	6118.8	0.1695
M07974_2.00:POU2F2	ATATGCAAATNAR	1e-19	-43.83	0	318	0.055	1155.8	0.032
M07975_2.00:POU2F2	ATATGCAAATNAR	1e-19	-43.83	0	318	0.055	1155.8	0.032
M04709_2.00:ELF1:ELF2:ELF4:ELK1:ELK3:ELK4:ERF:ERG:ETS1:ETS2:ETV1:ETV2:ETV3:ETV3L:ETV4:ETV5:FEV:FLI1:GABPA	VRCMGGAAGTR	1e-19	-43.81	0	1777	0.3074	9190.9	0.2546
M03005_2.00:ELF5:ETV7:SPI1:SPIB:SPIC	AAAAAGMGGAAGTA	1e-18	-43.71	0	124	0.0214	305.3	0.0085
M08062_2.00:TCF12:TCF3:TCF4	RACAGCTGSNS	1e-18	-43.64	0	980	0.1695	4629.2	0.1282
M05619_2.00:NR1I2:NR1I3:VDR	AAAGTTCAT	1e-18	-43.51	0	863	0.1493	3987.2	0.1104
M04443_2.00:SNAI1	TGCACCTGYT	1e-18	-43.24	0	723	0.1251	3233.6	0.0896
M01478_2.00:ELF1:ELF2:ELF4:ELK1:ELK3:ELK4:ERF:ERG:ETS1:ETS2:ETV1:ETV2:ETV3:ETV3L:ETV4:ETV5:FEV:FLI1:GABPA	NRCCGGAAGT	1e-18	-43.22	0	714	0.1235	3185.6	0.0882
M09531_2.00:ELF1:ELF2:ELF4:ELK1:ELK3:ELK4:ERF:ERG:ETS1:ETS2:ETV1:ETV2:ETV3:ETV3L:ETV4:ETV5:FEV:FLI1:GABPA	RCCGGAAGTD	1e-18	-42.91	0	608	0.1052	2627.5	0.0728
M09046_2.00:ELF1:ELF2:ELF4:ELK1:ELK3:ELK4:ERF:ERG:ETS1:ETS2:ETV1:ETV2:ETV3:ETV3L:ETV4:ETV5:FEV:FLI1:GABPA	GRCCGGAAGTG	1e-18	-42.89	0	389	0.0673	1508	0.0418
M04183_2.00:MSC:TCF21	HAACAGCTGTTN	1e-18	-42.62	0	460	0.0796	1866	0.0517
M03283_2.00:HOXA10:HOXA11:HOXA5:HOXA6:HOXA7:HOXA9:HOXB5:HOXB6:HOXB8:HOXB9:HOXC10:HOXC11:HOXC5:HOXC6:HOXC8:HOXC9:HOXD10:HOXD11:HOXD8:HOXD9	WTTTWATTGC	1e-18	-42.52	0	1222	0.2114	6007.4	0.1664
M09094_2.00:FOXI1:FOXJ3:FOXK1:FOXK2	AADGTAAACA	1e-18	-42.22	0	1748	0.3024	9055.7	0.2508
M01479_2.00:ELF1:ELF2:ELF4:ELK1:ELK3:ELK4:ERF:ERG:ETS1:ETS2:ETV1:ETV2:ETV3:ETV3L:ETV4:ETV5:FEV:FLI1:GABPA	NACCGGAAGT	1e-18	-41.99	0	385	0.0666	1497.3	0.0415
M02718_2.00:SOX1:SOX10:SOX11:SOX12:SOX13:SOX14:SOX15:SOX17:SOX18:SOX2:SOX21:SOX3:SOX30:SOX4:SOX5:SOX6:SOX7:SOX8:SOX9:SRY	GACAATGDN	1e-18	-41.89	0	1817	0.3143	9469.2	0.2623
M09589_2.00:POU2F2	ATATGCAAAT	1e-17	-41.43	0	290	0.0502	1042.3	0.0289
M01493_2.00:ELF1:ELF2:ELF4:ELK1:ELK3:ELK4:ERF:ERG:ETS1:ETS2:ETV1:ETV2:ETV3:ETV3L:ETV4:ETV5:FEV:FLI1:GABPA	NRCCGGAART	1e-17	-41.26	0	1940	0.3356	10212.5	0.2829
M09054_2.00:EHF:ELF1:ELF2:ELF3:ELF4:ELF5:ETV6:ETV7:SPI1:SPIC	GGAASSAGGAAGTGR	1e-17	-41.12	0	288	0.0498	1035.9	0.0287
M09469_2.00:MYF5:MYF6:MYOD1:MYOG	AACAGCTG	1e-17	-41	0	980	0.1695	4674.5	0.1295
M02965_2.00:ELF5:SPI1:SPIB:SPIC	AAAAAGCGGAAGTA	1e-17	-40.95	0	41	0.0071	44.2	0.0012
M05401_2.00:HOXA10:HOXA11:HOXA6:HOXA9:HOXB6:HOXB8:HOXB9:HOXC10:HOXC11:HOXC12:HOXC6:HOXC8:HOXC9:HOXD10:HOXD11:HOXD12:HOXD8:HOXD9	RTTTTATKRCV	1e-17	-40.85	0	1093	0.1891	5310	0.1471
M03954_2.00:RELA	TGGGAWTTTCCCA	1e-17	-40.82	0	123	0.0213	314	0.0087
M10015_2.00:MAF:MAFA:MAFB:MAFG:MAFK	TGCTGASTC	1e-17	-40.5	0	227	0.0393	757.1	0.021
M05117_2.00:HOXA10:HOXA11:HOXA6:HOXA9:HOXB6:HOXB8:HOXB9:HOXC10:HOXC11:HOXC12:HOXC6:HOXC8:HOXC9:HOXD10:HOXD11:HOXD12:HOXD8:HOXD9	GGTAATAAAAH	1e-17	-40.39	0	638	0.1104	2819.5	0.0781
M08853_2.00:SNAI2	KGCACCTGYY	1e-17	-40.26	0	1028	0.1778	4955.9	0.1373
M09347_2.00:NFKB1:RELA:RELB	GGGGGMTTTCCM	1e-17	-40.19	0	283	0.049	1019.3	0.0282
M09352_2.00:NFKB1:RELA:RELB	GGGGGMTTTCCM	1e-17	-40.19	0	283	0.049	1019.3	0.0282
M08039_2.00:RELA	KGGAATTTCCC	1e-17	-39.94	0	368	0.0637	1433.5	0.0397
M11308_2.00:SOX1:SOX10:SOX11:SOX12:SOX13:SOX14:SOX15:SOX17:SOX18:SOX2:SOX21:SOX3:SOX30:SOX4:SOX5:SOX6:SOX7:SOX8:SOX9:SRY	ACAAAGGG	1e-17	-39.94	0	2088	0.3612	11127	0.3082
M09791_2.00:TCF12:TCF3:TCF4	RGCAGGTGBCG	1e-17	-39.93	0	954	0.165	4548.5	0.126
M09173_2.00:ALX1:ALX3:ALX4:ARX:BARHL1:BARHL2:BARX1:BARX2:BSX:DRGX:EMX1:EMX2:EN1:EN2:ESX1:EVX1:EVX2:GBX1:GBX2:GSX1:GSX2:HESX1:HOXA1:HOXA2:HOXA3:HOXA4:HOXA5:HOXB1:HOXB2:HOXB3:HOXB4:HOXB5:HOXC4:HOXC5:HOXD1:HOXD3:HOXD4:LBX1:MEOX1:MEOX2:MIXL1:MNX1:MSX1:MSX2:NANOG:NANOGP8:NKX1-1:NKX1-2:PDX1:PHOX2A:PHOX2B:PROP1:PRRX1:PRRX2:RAX:RAX2:SHOX:SHOX2:TLX1:TLX3:UNCX:VAX1:VAX2:VENTX:VSX1:VSX2	TTTTATKGCYYT	1e-17	-39.52	0	681	0.1178	3061.8	0.0848
M08060_2.00:MYF5:MYOD1:MYOG	RGNRACAGCTGCN	1e-17	-39.47	0	989	0.1711	4751.7	0.1316
M08163_2.00:RUNX1:RUNX2:RUNX3	AAACCACAGAV	1e-17	-39.44	0	852	0.1474	3992.3	0.1106
M09633_2.00:RUNX1:RUNX2:RUNX3	SAAACCACAG	1e-17	-39.34	0	630	0.109	2791.6	0.0773
M08061_2.00:MYF5:MYF6:MYOD1:MYOG	RACAGCTGSNS	1e-17	-39.19	0	1074	0.1858	5233.7	0.145
M10023_2.00:CEBPA:CEBPB:CEBPE	TVTKTGGWAANNN	1e-17	-39.16	0	1591	0.2752	8204	0.2272
M09632_2.00:RUNX1:RUNX2:RUNX3	AAACCACARM	1e-16	-39.09	0	745	0.1289	3413.4	0.0945
M02964_2.00:ELF1:ELF2:ELF4:ELK1:ELK3:ELK4:ERF:ERG:ETS1:ETS2:ETV1:ETV2:ETV3:ETV3L:ETV4:ETV5:FEV:FLI1:GABPA	ACCGGAAGTR	1e-16	-38.94	0	212	0.0367	700.9	0.0194
M04542_2.00:ZNF282	TTTCCCACAACACD	1e-16	-38.35	0	206	0.0356	677.4	0.0188
M01496_2.00:ELF1:ELF2:ELF4:ELK1:ELK3:ELK4:ERF:ERG:ETS1:ETS2:ETV1:ETV2:ETV3:ETV3L:ETV4:ETV5:FEV:FLI1:GABPA	NASCGGAART	1e-16	-38.1	0	1913	0.3309	10128.3	0.2805
M01974_2.00:FOXC1:FOXC2:FOXD1:FOXD2:FOXD3:FOXD4:FOXD4L1:FOXD4L3:FOXD4L4:FOXD4L5:FOXD4L6:FOXE1:FOXG1:FOXI1:FOXI2:FOXI3:FOXJ3:FOXK2:FOXL1:FOXL2:FOXS1	RTAAACAA	1e-16	-38.02	0	1422	0.246	7246.2	0.2007
M02737_2.00:FOXC2:FOXD1:FOXD2:FOXD3:FOXG1:FOXI1:FOXI2:FOXI3:FOXJ2:FOXJ3:FOXK1:FOXK2:FOXP1:FOXP3	ATAAACAA	1e-16	-37.95	0	1420	0.2456	7236.1	0.2004
M06198_2.00:FOXO1:FOXO3:FOXO4:FOXO6	TCRTAAACA	1e-16	-37.91	0	1444	0.2498	7376	0.2043
M07805_2.00:TCF12:TCF3:TCF4	RSAGCAGCTGB	1e-16	-37.88	0	1270	0.2197	6373	0.1765
M01026_2.00:SOX1:SOX10:SOX11:SOX12:SOX13:SOX14:SOX15:SOX17:SOX18:SOX2:SOX21:SOX3:SOX30:SOX4:SOX5:SOX6:SOX7:SOX8:SOX9:SRY	AACAAAGG	1e-16	-37.72	0	1544	0.2671	7962.6	0.2206
M00756_2.00:NHLH1:NHLH2	NGCAGCTGTN	1e-16	-37.57	0	1451	0.251	7424.5	0.2056
M04768_2.00:ELF1:ELF2:ELF4:ELK1:ELK3:ELK4:ERF:ERG:ETS1:ETS2:ETV1:ETV2:ETV3:ETV3L:ETV4:ETV5:FEV:FLI1:GABPA	NACCGGAAGTR	1e-15	-36.62	0	279	0.0483	1030.4	0.0285
M11228_2.00:NFKB1:NFKB2	GGGGATTCCC	1e-15	-36.6	0	154	0.0266	460.7	0.0128
M04711_2.00:ELF1:ELF2:ELF4:ELK1:ELK3:ELK4:ERF:ERG:ETS1:ETS2:ETV1:ETV2:ETV3:ETV3L:ETV4:ETV5:FEV:FLI1:GABPA	DACCGGAAGTD	1e-15	-36.54	0	226	0.0391	781.8	0.0217
M03022_2.00:FOXO1:FOXO3:FOXO4:FOXO6	GTAAACAA	1e-15	-36.4	0	1437	0.2486	7369.9	0.2041
M09097_2.00:FOXO4	ARTAAACAA	1e-15	-36.36	0	1391	0.2406	7103.7	0.1968
M09107_2.00:FOXO1:FOXO3:FOXO4:FOXO6	ARTAAACAA	1e-15	-36.36	0	1391	0.2406	7103.7	0.1968
M04732_2.00:ELF1:ELF2:ELF4:ELK1:ELK3:ELK4:ERF:ERG:ETS1:ETS2:ETV1:ETV2:ETV3:ETV3L:ETV4:ETV5:FEV:FLI1:GABPA	NRCCGGAAGTR	1e-15	-36.34	0	259	0.0448	937.3	0.026
M07664_2.00:ZNF716	AATNTTNMTATTTCC	1e-15	-36.3	0	353	0.0611	1395.9	0.0387
M06188_2.00:ELF1:ELF2:ELF4:ELK1:ELK3:ELK4:ERF:ERG:ETS1:ETS2:ETV1:ETV2:ETV3:ETV3L:ETV4:ETV5:FEV:FLI1:GABPA	ACCGGAART	1e-15	-36.29	0	289	0.05	1081.6	0.03
M02994_2.00:ELF1:ELF2:ELF4:ELK1:ELK3:ELK4:ERF:ERG:ETS1:ETS2:ETV1:ETV2:ETV3:ETV3L:ETV4:ETV5:FEV:FLI1:GABPA	ACCGGAARTG	1e-15	-35.9	0	161	0.0278	494.4	0.0137
M01475_2.00:ELF5:SPI1:SPIB:SPIC	ADGVGGAAGT	1e-15	-35.88	0	2465	0.4264	13513.5	0.3743
M03006_2.00:ELF1:ELF2:ELF4:ELK1:ELK3:ELK4:ERF:ERG:ETS1:ETS2:ETV1:ETV2:ETV3:ETV3L:ETV4:ETV5:FEV:FLI1:GABPA	ACCGGAAGTR	1e-15	-35.75	0	251	0.0434	904.1	0.025
M01489_2.00:ELF1:ELF2:ELF4:ELK1:ELK3:ELK4:ERF:ERG:ETS1:ETS2:ETV1:ETV2:ETV3:ETV3L:ETV4:ETV5:FEV:FLI1:GABPA	NRCCGGAART	1e-15	-35.71	0	695	0.1202	3194.5	0.0885
M04760_2.00:ELF1:ELF2:ELF4:ELK1:ELK3:ELK4:ERF:ERG:ETS1:ETS2:ETV1:ETV2:ETV3:ETV3L:ETV4:ETV5:FEV:FLI1:GABPA	VACCGGAARTS	1e-15	-35.7	0	196	0.0339	650	0.018
M02196_2.00:EVX1:EVX2:HOXA11:HOXC11:HOXC12:HOXD11:HOXD12	TTAATTAC	1e-15	-35.57	0	1258	0.2176	6353.9	0.176
M08744_2.00:ASCL1:ASCL2	AGCAGCTGB	1e-15	-35.34	0	1294	0.2238	6565.8	0.1819
M06189_2.00:ELF1:ELF2:ELF4:ELK1:ELK3:ELK4:ERF:ERG:ETS1:ETS2:ETV1:ETV2:ETV3:ETV3L:ETV4:ETV5:ETV6:FEV:FLI1:GABPA	ACCGGAAGT	1e-15	-35.34	0	197	0.0341	657.7	0.0182
M10835_2.00:POU2F1	RDRHATGCAAATYAS	1e-15	-35.23	0	252	0.0436	913.2	0.0253
M09534_2.00:EHF:ELF1:ELF2:ELF3:ELF4:ELF5:ETV6:ETV7:SPI1:SPIC	ACVAGGAAGT	1e-15	-35.04	0	381	0.0659	1549.8	0.0429
M07625_2.00:ZNF212	TCTCTCTCTCTCTCTCTCTCTCTCTCTCTC	1e-15	-34.97	0	52	0.009	83.6	0.0023
M04049_2.00:TFAP2A:TFAP2B:TFAP2C:TFAP2D:TFAP2E	NSCCTNAGGSV	1e-15	-34.9	0	1744	0.3017	9205.3	0.255
M03026_2.00:FOXC1:FOXC2:FOXD1:FOXD2:FOXD3:FOXD4:FOXD4L1:FOXD4L3:FOXD4L4:FOXD4L5:FOXD4L6:FOXE1:FOXF1:FOXG1:FOXI1:FOXI2:FOXI3:FOXJ2:FOXJ3:FOXK1:FOXK2:FOXL1:FOXL2:FOXS1	GTAAACA	1e-15	-34.81	0	1337	0.2313	6825.5	0.1891
M03054_2.00:FOXC1:FOXC2:FOXD1:FOXD2:FOXD3:FOXD4:FOXD4L1:FOXD4L3:FOXD4L4:FOXD4L5:FOXD4L6:FOXE1:FOXG1:FOXI1:FOXI2:FOXI3:FOXJ3:FOXK2:FOXL1:FOXL2:FOXS1	GTAAACA	1e-15	-34.81	0	1337	0.2313	6825.5	0.1891
M04541_2.00:ZNF282	NTTCCCACAACACG	1e-15	-34.67	0	168	0.0291	532.3	0.0147
M10893_2.00:IRF1:IRF2	DNGAAAGTGAAAGYRA	1e-15	-34.61	0	204	0.0353	694.2	0.0192
M03467_2.00:RUNX1:RUNX2:RUNX3	AAACCGCAAA	1e-14	-34.53	0	398	0.0688	1642	0.0455
M10487_2.00:EHF:ELF1:ELF2:ELF3:ELF4:ELF5:ELK1:ELK3:ELK4:ERF:ERG:ETS1:ETS2:ETV1:ETV2:ETV3:ETV3L:ETV4:ETV5:ETV6:ETV7:FEV:FLI1:GABPA:SPDEF	RDAAGAGGAART	1e-14	-34.53	0	550	0.0951	2433.2	0.0674
M05700_2.00:NFKB1:NFKB2	AGGTRCTTCCCCT	1e-14	-34.52	0	134	0.0232	387.4	0.0107
M11237_2.00:RELA	GGGAATTTCC	1e-14	-34.44	0	269	0.0465	1001.7	0.0277
M02713_2.00:RELA	GGGGWTTTCC	1e-14	-34.34	0	368	0.0637	1491	0.0413
M04708_2.00:ELF1:ELF2:ELF4:ELK1:ELK3:ELK4:ERF:ERG:ETS1:ETS2:ETV1:ETV2:ETV3:ETV3L:ETV4:ETV5:FEV:FLI1:GABPA	NRCCGGAWGYN	1e-14	-34.32	0	578	0.1	2585.2	0.0716
M05357_2.00:SIX3:SIX6	NRYGATACGB	1e-14	-34.21	0	1146	0.1982	5740.2	0.159
M00793_2.00:FOXC2:FOXJ3:FOXK2:FOXP1:FOXP2:FOXP3:FOXP4	NGTAAACAA	1e-14	-34.08	0	1976	0.3418	10607.6	0.2938
M03605_2.00:TWIST1:TWIST2	AACACATGTT	1e-14	-34	0	660	0.1142	3031.2	0.084
M07972_2.00:POU2F2	ATATGCAAAT	1e-14	-33.87	0	436	0.0754	1844.4	0.0511
M07973_2.00:POU2F2	ATATGCAAAT	1e-14	-33.87	0	436	0.0754	1844.4	0.0511
M09580_2.00:CDX1:CDX2:CDX4:HOXA13:HOXC13	WTTTATGRCC	1e-14	-33.74	0	724	0.1252	3384.6	0.0938
M09072_2.00:ELF1:ELF2:ELF4:ELK1:ELK3:ELK4:ERF:ERG:ETS1:ETS2:ETV1:ETV2:ETV3:ETV3L:ETV4:ETV5:FEV:FLI1:GABPA	GGSRCCGGAAGYGG	1e-14	-33.69	0	236	0.0408	850.5	0.0236
M03040_2.00:FOXO4	GTAAACA	1e-14	-33.44	0	1537	0.2659	8022.9	0.2222
M09075_2.00:ELF1:ELF2:ELF4:ELK1:ELK3:ELK4:ERF:ERG:ETS1:ETS2:ETV1:ETV2:ETV3:ETV3L:ETV4:ETV5:FEV:FLI1:GABPA	GRRCCGGAAGYGG	1e-14	-33.23	0	331	0.0573	1317	0.0365
M04135_2.00:ASCL1:ASCL2	VGCAGCTGCN	1e-14	-32.86	0	1230	0.2128	6251.6	0.1732
M09639_2.00:SOX1:SOX10:SOX11:SOX12:SOX13:SOX14:SOX15:SOX17:SOX18:SOX2:SOX21:SOX3:SOX30:SOX4:SOX5:SOX6:SOX7:SOX8:SOX9:SRY	RACAAWGG	1e-14	-32.83	0	2592	0.4484	14377.8	0.3983
M03844_2.00:CRX:DMBX1:DPRX:GSC:GSC2:OTX1:OTX2:PITX1:PITX2:PITX3:TPRX1	RCGTTAATCCN	1e-14	-32.62	0	206	0.0356	718.2	0.0199
M09370_2.00:RUNX1:RUNX2:RUNX3	MMAAACCACARACM	1e-14	-32.62	0	410	0.0709	1725.7	0.0478
M04218_2.00:HES5	VCACACKT	1e-14	-32.55	0	3367	0.5824	19207.8	0.532
M10495_2.00:ELF1:ELF2:ELF4:ELK1:ELK3:ELK4:ERF:ERG:ETS1:ETS2:ETV1:ETV2:ETV3:ETV3L:ETV4:ETV5:FEV:FLI1:GABPA	BVKACCGGAWGTNRGW	1e-14	-32.44	0	187	0.0323	632.6	0.0175
M02711_2.00:RELA	GGGAATTTCC	1e-14	-32.35	0	241	0.0417	886	0.0245
M05897_2.00:SOX1:SOX10:SOX11:SOX12:SOX13:SOX14:SOX15:SOX17:SOX18:SOX2:SOX21:SOX3:SOX30:SOX4:SOX5:SOX6:SOX7:SOX8:SOX9:SRY	AACAATRGVN	1e-14	-32.25	0	2170	0.3754	11824.9	0.3275
M03007_2.00:ELF1:ELF2:ELF4:ELK1:ELK3:ELK4:ERF:ERG:ETS1:ETS2:ETV1:ETV2:ETV3:ETV3L:ETV4:ETV5:FEV:FLI1:GABPA	ACCGGAAGTN	1e-13	-32.01	0	394	0.0682	1650.3	0.0457
M08973_2.00:SNAI2	VBGCACCTGYY	1e-13	-31.83	0	931	0.161	4569.5	0.1266
M10753_2.00:PBX1:PBX2:PBX3:PBX4	ATCAATCAA	1e-13	-31.36	0	1062	0.1837	5321.9	0.1474
M04735_2.00:ELF1:ELF2:ELF4:ELK1:ELK3:ELK4:ERF:ERG:ETS1:ETS2:ETV1:ETV2:ETV3:ETV3L:ETV4:ETV5:FEV:FLI1:GABPA	VACCGGAAGTN	1e-13	-31.25	0	244	0.0422	909.1	0.0252
M04225_2.00:OLIG2:OLIG3	AACAKMTGTT	1e-13	-31.14	0	607	0.105	2789.4	0.0773
M05699_2.00:NFKB1:NFKB2	MGGTRCTTCCCCB	1e-13	-31.13	0	123	0.0213	359.2	0.01
M11224_2.00:NFAT5	GGAAAAYWCYAB	1e-13	-30.88	0	559	0.0967	2534.5	0.0702
M08140_2.00:POU2F2	ATATGCAAATKMR	1e-13	-30.85	0	313	0.0541	1253	0.0347
M09063_2.00:ELF1:ELF2:ELF4:ELK1:ELK3:ELK4:ERF:ERG:ETS1:ETS2:ETV1:ETV2:ETV3:ETV3L:ETV4:ETV5:FEV:FLI1:GABPA	RRGSAGGAAGTGRR	1e-13	-30.8	0	930	0.1609	4584.9	0.127
M09373_2.00:RUNX1:RUNX2:RUNX3	VAAACCACAGRV	1e-13	-30.67	0	599	0.1036	2753.4	0.0763
M10534_2.00:FOXM1	WAGACTGATTA	1e-13	-30.65	0	734	0.127	3492.6	0.0967
M01483_2.00:ELF1:ELF2:ELF4:ELK1:ELK3:ELK4:ERF:ERG:ETS1:ETS2:ETV1:ETV2:ETV3:ETV3L:ETV4:ETV5:FEV:FLI1:GABPA	NACCGGAAGT	1e-13	-30.64	0	335	0.0579	1365.2	0.0378
M03196_2.00:CDX1:CDX2:CDX4	TTTTATKRC	1e-13	-30.6	0	1364	0.2359	7080.5	0.1961
M04710_2.00:ELF1:ELF2:ELF4:ELK1:ELK3:ELK4:ERF:ERG:ETS1:ETS2:ETV1:ETV2:ETV3:ETV3L:ETV4:ETV5:FEV:FLI1:GABPA	NACCGGAAGTD	1e-13	-30.21	0	157	0.0272	512.8	0.0142
M10515_2.00:EHF:ELF1:ELF2:ELF3:ELF4:ELF5:ETV6:ETV7	CCCGGAARTA	1e-13	-30.2	0	996	0.1723	4970.4	0.1377
M11229_2.00:NFKB1:NFKB2	GGGGACTTTCCA	1e-13	-30.09	0	106	0.0183	294.6	0.0082
M06472_2.00:ONECUT1:ONECUT2:ONECUT3	HAATCAA	1e-13	-30.05	0	1781	0.3081	9552.4	0.2646
M08131_2.00:CDX1:CDX2:CDX4	TTTTATKGCYY	1e-13	-29.97	0	671	0.1161	3157.3	0.0875
M10618_2.00:GTF2IRD1	CAGCGRNV	1e-13	-29.97	0	2884	0.4989	16266	0.4506
M02797_2.00:NHLH1:NHLH2	MGCAGCTGCG	1e-12	-29.76	0	321	0.0555	1304	0.0361
M10539_2.00:FOXO1:FOXO3:FOXO4:FOXO6:FOXP4	AAARTAAACAADH	1e-12	-29.51	0	1344	0.2325	6990	0.1936
M11311_2.00:LEF1:TCF7:TCF7L1:TCF7L2	SATCAAAGKG	1e-12	-29.37	0	1246	0.2155	6424.2	0.1779
M07978_2.00:IRF4:IRF8	ANTSHGGAAMTGAVWCAD	1e-12	-29.18	0	172	0.0298	587.3	0.0163
M05546_2.00:IRF1:IRF2	CGAAAGYGAAAS	1e-12	-29.08	0	187	0.0323	657.4	0.0182
M10640_2.00:CRX:DMBX1:DPRX:GSC:GSC2:OTX1:OTX2:PITX1:PITX2:PITX3:TPRX1	CACTAATCCYYT	1e-12	-29	0	312	0.054	1267.2	0.0351
M05248_2.00:CDX1:CDX2:CDX4	NTTTAYGAYN	1e-12	-28.97	0	1811	0.3133	9761.6	0.2704
M10499_2.00:ELF1:ELF2:ELF4:ELK1:ELK3:ELK4:ERF:ERG:ETS1:ETS2:ETV1:ETV2:ETV3:ETV3L:ETV4:ETV5:FEV:FLI1:GABPA	RCAGGAAGTGVKTGS	1e-12	-28.96	0	252	0.0436	969.9	0.0269
M10723_2.00:CDX1:CDX2:CDX4	KYCATAAATRN	1e-12	-28.78	0	1617	0.2797	8613.1	0.2386
M10485_2.00:EHF:ELF1:ELF2:ELF3:ELF4:ELF5:ELK1:ELK3:ELK4:ERF:ERG:ETS1:ETS2:ETV1:ETV2:ETV3:ETV3L:ETV4:ETV5:ETV6:ETV7:FEV:FLI1:GABPA:SPDEF	DVCAGGAAGTGS	1e-12	-28.7	0	1171	0.2026	6006.4	0.1664
M10881_2.00:IRF1:IRF2	NRGAAAGTGAAAST	1e-12	-28.46	0	407	0.0704	1762.5	0.0488
M01753_2.00:MAX	VCACGTGGN	1e-12	-27.98	0	2639	0.4565	14815.1	0.4104
M09369_2.00:RUNX1:RUNX2:RUNX3	AAACCACARM	1e-12	-27.78	0	773	0.1337	3762.9	0.1042
M09672_2.00:HOXA10:HOXA11:HOXA6:HOXA9:HOXB6:HOXB8:HOXB9:HOXC10:HOXC11:HOXC12:HOXC5:HOXC6:HOXC8:HOXC9:HOXD10:HOXD11:HOXD12:HOXD8:HOXD9	TCATAAAACM	1e-12	-27.68	0	981	0.1697	4939.2	0.1368
M09161_2.00:HOXA10:HOXA11:HOXA5:HOXA6:HOXA7:HOXA9:HOXB5:HOXB6:HOXB8:HOXB9:HOXC10:HOXC11:HOXC5:HOXC6:HOXC8:HOXC9:HOXD10:HOXD11:HOXD8:HOXD9	TTTTATKGCH	1e-11	-27.6	0	789	0.1365	3855.5	0.1068
M05160_2.00:SIX3:SIX6	NDYGATACGY	1e-11	-27.54	0	1156	0.2	5947.3	0.1647
M09768_2.00:ARID3A:ARID3B:ARID3C	THRATTAATN	1e-11	-27.45	0	1430	0.2474	7546.5	0.209
M04764_2.00:ELF1:ELF2:ELF4:ELK1:ELK3:ELK4:ERF:ERG:ETS1:ETS2:ETV1:ETV2:ETV3:ETV3L:ETV4:ETV5:FEV:FLI1:GABPA	VACCGGAAGTG	1e-11	-27.45	0	139	0.024	450.8	0.0125
M08112_2.00:ELF1:ELF2:ELF4:ELK1:ELK3:ELK4:ERF:ERG:ETS1:ETS2:ETV1:ETV2:ETV3:ETV3L:ETV4:ETV5:FEV:FLI1:GABPA	RCCGGAAGTGG	1e-11	-27.32	0	252	0.0436	985.5	0.0273
M02979_2.00:ELF1:ELF2:ELF4:ELK1:ELK3:ELK4:ERF:ERG:ETS1:ETS2:ETV1:ETV2:ETV3:ETV3L:ETV4:ETV5:FEV:FLI1:GABPA	ACCGGAAGTD	1e-11	-27.24	0	168	0.0291	583.7	0.0162
M06548_2.00:BARHL1:BARHL2:HOXA6:HOXB6:HOXB8:HOXC6:HOXC8:HOXD8:NKX1-1:NKX1-2	TTAATTG	1e-11	-27.07	0	1400	0.2422	7380.2	0.2044
M09374_2.00:RUNX1:RUNX2:RUNX3	CWAACCACAGCC	1e-11	-26.94	0	520	0.0899	2385.7	0.0661
M04796_2.00:ELF1:ELF2:ELF4:ELK1:ELK3:ELK4:ERF:ERG:ETS1:ETS2:ETV1:ETV2:ETV3:ETV3L:ETV4:ETV5:FEV:FLI1:GABPA	NACCGGAAGTR	1e-11	-26.76	0	140	0.0242	459.3	0.0127
M09153_2.00:CRX:DMBX1:DPRX:GSC:GSC2:OTX1:OTX2:PITX1:PITX2:PITX3:TPRX1	SYTAATCCCYT	1e-11	-26.69	0	567	0.0981	2644.1	0.0732
M02820_2.00:ATOH1	AACATATGBY	1e-11	-26.22	0	439	0.0759	1962.7	0.0544
M03446_2.00:NFKB1:NFKB2	AGGGGAWTCCCCT	1e-11	-26.21	0	46	0.008	85.5	0.0024
M11231_2.00:NFKB1:NFKB2	GGRAATTCCCCN	1e-11	-26.14	0	348	0.0602	1485.9	0.0412
M03001_2.00:ELF1:ELF2:ELF4:ELK1:ELK3:ELK4:ERF:ERG:ETS1:ETS2:ETV1:ETV2:ETV3:ETV3L:ETV4:ETV5:FEV:FLI1:GABPA	ACCGGAAGTR	1e-11	-25.99	0	173	0.0299	616.8	0.0171
M10091_2.00:ZEB1:ZEB2	SYGCACCTGKGC	1e-11	-25.96	0	693	0.1199	3351	0.0928
M03725_2.00:ELF1:ELF2:ELF4:ELK1:ELK3:ELK4:ERF:ERG:ETS1:ETS2:ETV1:ETV2:ETV3:ETV3L:ETV4:ETV5:FEV:FLI1:GABPA	ACCGGAAGTG	1e-11	-25.94	0	185	0.032	673.2	0.0186
M09378_2.00:NFIA:NFIB:NFIC:NFIX	CYTGGCHCCCTGCCARG	1e-11	-25.81	0	112	0.0194	342.6	0.0095
M09070_2.00:ELF1:ELF2:ELF4:ELK1:ELK3:ELK4:ERF:ERG:ETS1:ETS2:ETV1:ETV2:ETV3:ETV3L:ETV4:ETV5:FEV:FLI1:GABPA	ACCGGAAGTGR	1e-10	-25.31	0	196	0.0339	731.9	0.0203
M05892_2.00:SOX1:SOX10:SOX11:SOX12:SOX13:SOX14:SOX15:SOX17:SOX18:SOX2:SOX21:SOX3:SOX30:SOX4:SOX5:SOX6:SOX7:SOX8:SOX9:SRY	WAACAATRGV	1e-10	-25.27	0	1106	0.1913	5713.8	0.1583
M08775_2.00:TCF12:TCF3:TCF4	YGCACCTGB	1e-10	-25.18	0	1187	0.2053	6185.1	0.1713
M05792_2.00:SOX1:SOX10:SOX11:SOX12:SOX13:SOX14:SOX15:SOX17:SOX18:SOX2:SOX21:SOX3:SOX30:SOX4:SOX5:SOX6:SOX7:SOX8:SOX9:SRY	SCATTGTB	1e-10	-25.12	0	1848	0.3197	10096.8	0.2797
M02689_2.00:PAX2:PAX4:PAX6	TTCACGCWTGANTT	1e-10	-24.67	0	41	0.0071	73.2	0.002
M02796_2.00:NHLH1:NHLH2	CGCAGCTGCG	1e-10	-24.51	0	322	0.0557	1371.1	0.038
M09529_2.00:EHF:ELF1:ELF2:ELF3:ELF4:ELF5:ELK1:ELK3:ELK4:ERF:ERG:ETS1:ETS2:ETV1:ETV2:ETV3:ETV3L:ETV4:ETV5:ETV6:ETV7:FEV:FLI1:GABPA:SPDEF	AVCCGGAAGT	1e-10	-24.31	0	223	0.0386	872.8	0.0242
M09631_2.00:RUNX1:RUNX2:RUNX3	ACCACATCCTGY	1e-10	-24.13	0	132	0.0228	441.4	0.0122
M09636_2.00:NFIA:NFIB:NFIC:NFIX	CYTGGCABNSTGCCAR	1e-10	-24.13	0	99	0.0171	296.6	0.0082
M02741_2.00:MEIS1:MEIS2:MEIS3:PKNOX1:PKNOX2:TGIF1:TGIF2	GGACAGGT	1e-10	-24.04	0	1337	0.2313	7092.9	0.1965
M03984_2.00:T:TBX19	AGGTGTGAAAT	1e-10	-23.8	0	341	0.059	1480	0.041
M04174_2.00:OLIG2:OLIG3	AACAKATGGT	1e-10	-23.29	0	695	0.1202	3415.8	0.0946
M05157_2.00:ALX1:ALX3:ALX4:ARX:DRGX:EN1:EN2:ESX1:HESX1:ISX:LHX2:LHX3:LHX4:LHX6:LHX8:LHX9:LMX1A:LMX1B:MIXL1:NOBOX:OTP:PHOX2A:PHOX2B:PROP1:PRRX1:PRRX2:RAX:RAX2:SEBOX:SHOX:SHOX2:UNCX:VSX1:VSX2:ZFHX2	TTAACGAG	1e-10	-23.13	0	142	0.0246	494.1	0.0137
M10874_2.00:HSF2:HSF4	AGAAMAGAAMAGAAM	1e-09	-23.03	0	107	0.0185	337	0.0093
M01738_2.00:BHLHE40:BHLHE41	KCACGTGN	1e-09	-22.9	0	3236	0.5598	18703.1	0.5181
M01731_2.00:NPAS2	NSCACGTGTN	1e-09	-22.9	0	760	0.1315	3789.7	0.105
M10520_2.00:ELF1:ELF2:ELF4:ELK1:ELK3:ELK4:ERF:ERG:ETS1:ETS2:ETV1:ETV2:ETV3:ETV3L:ETV4:ETV5:FEV:FLI1:GABPA	CMGGAAGC	1e-09	-22.82	0	1003	0.1735	5179.7	0.1435
M06449_2.00:SOX1:SOX10:SOX11:SOX12:SOX13:SOX14:SOX15:SOX17:SOX18:SOX2:SOX21:SOX3:SOX30:SOX4:SOX5:SOX6:SOX7:SOX8:SOX9:SRY	CTCCTTTGTCC	1e-09	-22.81	0	409	0.0707	1853.1	0.0513
M08273_2.00:ZNF200	RCTTCCGGYBBS	1e-09	-22.62	0	293	0.0507	1245.5	0.0345
M01307_2.00:RUNX1:RUNX2:RUNX3	NWAACCGCAA	1e-09	-22.55	0	804	0.1391	4046.4	0.1121
M04195_2.00:BHLHA15	AVCAGCTGTY	1e-09	-22.47	0	1120	0.1937	5866.9	0.1625
M05232_2.00:CRX:DMBX1:DPRX:GSC:GSC2:OTX1:OTX2:PITX1:PITX2:PITX3:TPRX1	YTAATCCC	1e-09	-22.47	0	1267	0.2192	6725.9	0.1863
M07594_2.00:ZNF300	CAKACCCCCWWACRCMGCMCMCMCBMCAK	1e-09	-22.35	0	15	0.0026	10.8	0.0003
M11236_2.00:REL:RELA	GGGGAATTTCCC	1e-09	-22.34	0	246	0.0426	1008.9	0.0279
M10111_2.00:PRDM1	CACTTTCAC	1e-09	-22.34	0	400	0.0692	1812.5	0.0502
M03953_2.00:RELA	TGGGTTTTTCCCA	1e-09	-22.26	0	69	0.0119	182.6	0.0051
M09878_2.00:NHLH1:NHLH2	CATYTGTGC	1e-09	-22.16	0	3405	0.589	19794.2	0.5483
M09218_2.00:POU2F2	AYATGCAAATK	1e-09	-22.15	0	629	0.1088	3069.4	0.085
M09224_2.00:POU2F2	AYATGCAAATK	1e-09	-22.15	0	629	0.1088	3069.4	0.085
M05412_2.00:PAX2:PAX4:PAX6	TCACGCATSAVTGCVCN	1e-09	-21.99	0	46	0.008	97.6	0.0027
M07923_2.00:CTCF	CGCCCYCTGGTGGCC	1e-09	-21.99	0	53	0.0092	122.6	0.0034
M06231_2.00:ALX1:ALX3:ALX4:ARX:BARHL1:BARHL2:BARX1:BARX2:BSX:DLX1:DLX2:DLX3:DLX4:DLX5:DLX6:DRGX:EMX1:EMX2:EN1:EN2:ESX1:EVX1:EVX2:GBX1:GBX2:GSX1:GSX2:HMX1:HMX2:HMX3:HOXA1:HOXA2:HOXA3:HOXA4:HOXA5:HOXB1:HOXB2:HOXB3:HOXB4:HOXB5:HOXC4:HOXC5:HOXD1:HOXD3:HOXD4:ISX:MEOX1:MEOX2:MIXL1:MNX1:MSX1:MSX2:NANOG:NANOGP8:NKX1-1:NKX1-2:PDX1:PHOX2A:PHOX2B:PROP1:PRRX1:PRRX2:RAX:RAX2:SEBOX:SHOX:SHOX2:UNCX:VAX1:VAX2:VE…	YTTAATKRG	1e-09	-21.89	0	1255	0.2171	6671.3	0.1848
M03115_2.00:CDX1:CDX2:CDX4	TTTTATKRC	1e-09	-21.77	0	1398	0.2418	7517.5	0.2082
M04900_2.00:HOXA10:HOXA11:HOXA9:HOXB9:HOXC10:HOXC11:HOXC12:HOXC9:HOXD10:HOXD11:HOXD12:HOXD9	RTTTTATKRCH	1e-09	-21.75	0	734	0.127	3667.7	0.1016
M03057_2.00:FOXC2:FOXD1:FOXD2:FOXD3:FOXG1:FOXI1:FOXI2:FOXI3:FOXJ2:FOXJ3:FOXK1:FOXK2:FOXP1:FOXP3:FOXP4	RTAAACAA	1e-09	-21.74	0	1528	0.2643	8289.1	0.2296
M05540_2.00:IRF4:IRF8	NYGAAACTGAAACTR	1e-09	-21.7	0	78	0.0135	221.4	0.0061
M02967_2.00:ELF1:ELF2:ELF4:ELK1:ELK3:ELK4:ERF:ERG:ETS1:ETS2:ETV1:ETV2:ETV3:ETV3L:ETV4:ETV5:FEV:FLI1:GABPA	AACCGGAAATA	1e-09	-21.66	0	83	0.0144	242.2	0.0067
M09050_2.00:EHF:ELF1:ELF2:ELF3:ELF4:ELF5:ELK1:ELK3:ELK4:ERF:ERG:ETS1:ETS2:ETV1:ETV2:ETV3:ETV3L:ETV4:ETV5:ETV6:ETV7:FEV:FLI1:GABPA:SPDEF	GAACCCGGAAGTGS	1e-09	-21.65	0	112	0.0194	368	0.0102
M03292_2.00:PAX3:PAX7	TAATCGATTA	1e-09	-21.64	0	151	0.0261	548.3	0.0152
M04793_2.00:ELF1:ELF2:ELF4:ELK1:ELK3:ELK4:ERF:ERG:ETS1:ETS2:ETV1:ETV2:ETV3:ETV3L:ETV4:ETV5:FEV:FLI1:GABPA	NACCGGAAGTR	1e-09	-21.5	0	116	0.0201	387.9	0.0107
M05545_2.00:IRF1:IRF2	CGAAASYGAAAS	1e-09	-21.13	0	234	0.0405	961.6	0.0266
M05754_2.00:SOX1:SOX10:SOX11:SOX12:SOX13:SOX14:SOX15:SOX17:SOX18:SOX2:SOX21:SOX3:SOX30:SOX4:SOX5:SOX6:SOX7:SOX8:SOX9:SRY	CATTGTYC	1e-09	-21.13	0	1808	0.3127	9984.7	0.2766
M02969_2.00:ELF1:ELF2:ELF4:ELK1:ELK3:ELK4:ERF:ERG:ETS1:ETS2:ETV1:ETV2:ETV3:ETV3L:ETV4:ETV5:FEV:FLI1:GABPA	ACCGGAAGTD	1e-09	-20.98	0	142	0.0246	511.5	0.0142
M09084_2.00:FOXI1:FOXI2:FOXI3:FOXJ1:FOXJ2:FOXJ3:FOXK2:FOXP3	WAAAYAAACA	1e-09	-20.78	0	1256	0.2173	6709.5	0.1858
M09100_2.00:FOXI1:FOXI2:FOXI3:FOXJ1:FOXJ2:FOXJ3:FOXK2:FOXP3	WAAAYAAACA	1e-09	-20.78	0	1256	0.2173	6709.5	0.1858
M10726_2.00:CDX1:CDX2:CDX4	WDDNWWTTTATRRH	1e-09	-20.76	0	1546	0.2674	8427.8	0.2334
M10819_2.00:POU2F2	NDAWATGCAAATYA	1e-08	-20.6	0	354	0.0612	1593.5	0.0441
M04110_2.00:BHLHE22:BHLHE23	ACCATATGGT	1e-08	-20.47	0	314	0.0543	1383.2	0.0383
M09794_2.00:TCF12:TCF3:TCF4	VSRGCAGGTGTBCSY	1e-08	-20.38	0	283	0.049	1223	0.0339
M11230_2.00:NFKB1:NFKB2	DGGGGAMTTTCCBN	1e-08	-20.26	0	135	0.0234	484.3	0.0134
M05987_2.00:BHLHE22:BHLHE23	ACATCTGTC	1e-08	-20.24	0	681	0.1178	3401.1	0.0942
M05688_2.00:PAX1:PAX2:PAX3:PAX5:PAX6:PAX7:PAX8:PAX9	KCASTCAAGCGTGACSR	1e-08	-20.15	0	10	0.0017	4.2	0.0001
M04758_2.00:EHF:ELF1:ELF2:ELF3:ELF4:ELF5:ETV6:ETV7:SPI1:SPIC	GACCCGGAAGTD	1e-08	-20.12	0	132	0.0228	472	0.0131
M10482_2.00:ELF1:ELF2:ELF4:ELK1:ELK3:ELK4:ERF:ERG:ETS1:ETS2:ETV1:ETV2:ETV3:ETV3L:ETV4:ETV5:FEV:FLI1:GABPA	CACTTCCKGK	1e-08	-20.12	0	494	0.0855	2361	0.0654
M02075_2.00:HOXA2:HOXB2:HOXC12:HOXD12:MNX1	TTAATTAC	1e-08	-20.1	0	1305	0.2257	7018.6	0.1944
M02710_2.00:REL:RELA	GGGGMTTTCC	1e-08	-20.1	0	548	0.0948	2660	0.0737
M11235_2.00:REL:RELA	GGGGMTTTCC	1e-08	-19.99	0	546	0.0944	2650.9	0.0734
M09480_2.00:ATOH1	VNRVCAGCTGGY	1e-08	-19.97	0	650	0.1124	3232.5	0.0895
M03475_2.00:NFIA:NFIB:NFIC:NFIX	YTGGCDNNDTGCCAA	1e-08	-19.66	0	74	0.0128	215.4	0.006
M09056_2.00:ELF1:ELF2:ELF4:ELK1:ELK3:ELK4:ERF:ERG:ETS1:ETS2:ETV1:ETV2:ETV3:ETV3L:ETV4:ETV5:FEV:FLI1:GABPA	GVVRCCGGAAGTGV	1e-08	-19.63	0	110	0.019	373.9	0.0104
M03968_2.00:NFIA:NFIB:NFIC:NFIX	TTGGCANNNTGCCAA	1e-08	-19.57	0	54	0.0093	135.9	0.0038
M04791_2.00:EHF:ELF1:ELF2:ELF4:ELK1:ELK3:ELK4:ERF:ERG:ETS1:ETS2:ETV1:ETV2:ETV3:ETV3L:ETV4:ETV5:FEV:FLI1:GABPA	NACCGGAAGTG	1e-08	-19.52	0	139	0.024	509.4	0.0141
M02398_2.00:NR1I2:NR1I3:VDR	GAGTTCAW	1e-08	-19.47	0	1518	0.2626	8302.8	0.23
M05873_2.00:CRX:DMBX1:DPRX:GSC:GSC2:OTX1:OTX2:PITX1:PITX2:PITX3:TPRX1	TAATCCGHTWA	1e-08	-19.4	0	189	0.0327	754.8	0.0209
M05766_2.00:SOX1:SOX10:SOX11:SOX12:SOX13:SOX14:SOX15:SOX17:SOX18:SOX2:SOX21:SOX3:SOX30:SOX4:SOX5:SOX6:SOX7:SOX8:SOX9:SRY	RAACAAAGRV	1e-08	-18.99	0	1762	0.3048	9781.6	0.2709
M09507_2.00:CTCFL	CNNBRGCGCCCCCTGSTGGC	1e-08	-18.93	0	44	0.0076	100.2	0.0028
M05747_2.00:NFIA:NFIB:NFIC:NFIX	BTTGGCNNNGTGCCARN	1e-08	-18.82	0	76	0.0131	228.9	0.0063
M05753_2.00:SOX1:SOX10:SOX11:SOX12:SOX13:SOX14:SOX15:SOX17:SOX18:SOX2:SOX21:SOX3:SOX30:SOX4:SOX5:SOX6:SOX7:SOX8:SOX9:SRY	SAACAATG	1e-08	-18.61	0	1774	0.3069	9867.4	0.2733
M06139_2.00:SCRT1:SCRT2	CACCTGTTG	1e-08	-18.6	0	509	0.088	2472.1	0.0685
M05082_2.00:HOXA10:HOXA11:HOXA9:HOXB9:HOXC10:HOXC11:HOXC12:HOXC9:HOXD10:HOXD11:HOXD12:HOXD9	DTTTTATKRCN	1e-08	-18.54	0	1354	0.2342	7357.1	0.2038
M10488_2.00:ELF1:ELF2:ELF4:ELK1:ELK3:ELK4:ERF:ERG:ETS1:ETS2:ETV1:ETV2:ETV3:ETV3L:ETV4:ETV5:FEV:FLI1:GABPA	YSMRCCGGAAGTNM	1e-08	-18.48	0	174	0.0301	689.6	0.0191
M06429_2.00:HNF4A:HNF4G:NR2E1:NR2F1:NR2F2:NR2F6:NR6A1:RXRB	GGGGTCAA	1e-07	-18.4	0	947	0.1638	4971.7	0.1377
M09463_2.00:MYF5:MYF6:MYOD1:MYOG	BAACAGCTGT	1e-07	-18.39	0	496	0.0858	2404.3	0.0666
M09427_2.00:T:TBX19	TTVRCAGGDARGTGTGAADT	1e-07	-18.38	0	37	0.0064	77.7	0.0022
M11389_2.00:TBP:TBPL2	NCTATAAAAG	1e-07	-18.3	0	799	0.1382	4119.8	0.1141
M07877_2.00:CTCF	RGCGCCCCCTGGTGG	1e-07	-18.13	0	56	0.0097	149.5	0.0041
M07957_2.00:ELF1:ELF2:ELF4:ELK1:ELK3:ELK4:ERF:ERG:ETS1:ETS2:ETV1:ETV2:ETV3:ETV3L:ETV4:ETV5:FEV:FLI1:GABPA	CCGGAAGTGG	1e-07	-18.1	0	278	0.0481	1227.4	0.034
M01971_2.00:ELF1:ELF2:ELF4:ELK1:ELK3:ELK4:ERF:ERG:ETS1:ETS2:ETV1:ETV2:ETV3:ETV3L:ETV4:ETV5:FEV:FLI1:GABPA	CCGGAAGT	1e-07	-18.02	0	155	0.0268	600.6	0.0166
M07907_2.00:CTCF	BRGYGCCMYCTRGTGGCC	1e-07	-17.93	0	40	0.0069	89.8	0.0025
M09667_2.00:EHF:ELF1:ELF2:ELF3:ELF4:ELF5:ELK1:ELK3:ELK4:ERF:ERG:ETS1:ETS2:ETV1:ETV2:ETV3:ETV3L:ETV4:ETV5:ETV6:ETV7:FEV:FLI1:GABPA:SPDEF	AAHCMGGAAGT	1e-07	-17.75	0	491	0.0849	2389.4	0.0662
M01301_2.00:PAX1:PAX2:PAX3:PAX5:PAX6:PAX7:PAX8:PAX9	HSCGTGACB	1e-07	-17.73	0	2508	0.4338	14378	0.3983
M07910_2.00:CTCF	CNVBRGCGCCCCCTGGTGGC	1e-07	-17.72	0	26	0.0045	44	0.0012
M09069_2.00:ELF1:ELF2:ELF4:ELK1:ELK3:ELK4:ERF:ERG:ETS1:ETS2:ETV1:ETV2:ETV3:ETV3L:ETV4:ETV5:FEV:FLI1:GABPA	GGMRCCGGAAGTGV	1e-07	-17.71	0	92	0.0159	305.7	0.0085
M05784_2.00:SOX1:SOX10:SOX11:SOX12:SOX13:SOX14:SOX15:SOX17:SOX18:SOX2:SOX21:SOX3:SOX30:SOX4:SOX5:SOX6:SOX7:SOX8:SOX9:SRY	NCATTGTKNN	1e-07	-17.71	0	1992	0.3446	11220.2	0.3108
M05748_2.00:NFIA:NFIB:NFIC:NFIX	NTTGGCRNNDTGCCAAN	1e-07	-17.69	0	57	0.0099	155.6	0.0043
M09076_2.00:EHF:ELF1:ELF2:ELF3:ELF4:ELF5:ETV6:ETV7:SPI1:SPIC	GGAAGRAGGAAGARGRR	1e-07	-17.69	0	158	0.0273	618.7	0.0171
M04746_2.00:EHF:ELF1:ELF2:ELF3:ELF4:ELF5:ELK1:ELK3:ELK4:ERF:ERG:ETS1:ETS2:ETV1:ETV2:ETV3:ETV3L:ETV4:ETV5:ETV6:ETV7:FEV:FLI1:GABPA:SPDEF	AACCCGGAAGTR	1e-07	-17.64	0	152	0.0263	589.1	0.0163
M10478_2.00:ELF1:ELF2:ELF4:ELK1:ELK3:ELK4:ERF:ERG:ETS1:ETS2:ETV1:ETV2:ETV3:ETV3L:ETV4:ETV5:FEV:FLI1:GABPA	AAHAACAGGAAGTG	1e-07	-17.59	0	158	0.0273	619.8	0.0172
M08255_2.00:ZNF519	CWCTTCCGGT	1e-07	-17.48	0	343	0.0593	1583.9	0.0439
M04393_2.00:SNAI2	TGCACCTGTY	1e-07	-17.47	0	987	0.1707	5230.4	0.1449
M07893_2.00:CTCF	SYGCCMYCTGGTGGC	1e-07	-17.45	0	73	0.0126	223.5	0.0062
M10830_2.00:POU2F1	MKVATTTGCATATT	1e-07	-17.35	0	80	0.0138	254.7	0.0071
M07900_2.00:CTCF	VBRGCGCCCCCTGGTGG	1e-07	-17.25	0	41	0.0071	95.4	0.0026
M05544_2.00:IRF4:IRF8	RYGAAACTGAAACTA	1e-07	-17.25	0	31	0.0054	60.2	0.0017
M05413_2.00:PAX2:PAX4:PAX6	TYACGCATGANYGMACA	1e-07	-17.14	0	30	0.0052	57.2	0.0016
M08740_2.00:MITF:TFE3:TFEB:TFEC	TCACGTGACC	1e-07	-17.11	0	246	0.0426	1073.9	0.0297
M07871_2.00:CTCF	GCCMCCTGGTGGCCR	1e-07	-17.06	0	57	0.0099	158.5	0.0044
M07912_2.00:CTCF	GYGCCCCCTGGTGGC	1e-07	-17.01	0	63	0.0109	183.9	0.0051
M09379_2.00:NFIA:NFIB:NFIC:NFIX	YTGGCANCNTGCCAA	1e-07	-16.93	0	93	0.0161	315.4	0.0087
M09383_2.00:NFIA:NFIB:NFIC:NFIX	YTGGCANCNTGCCAA	1e-07	-16.93	0	93	0.0161	315.4	0.0087
M05432_2.00:PAX4	TTCACGCWTSAVYGCRCM	1e-07	-16.87	0	14	0.0024	13.8	0.0004
M07878_2.00:CTCF	GCGCCCCCTGGTGGC	1e-07	-16.79	0	40	0.0069	94	0.0026
M08947_2.00:ZNF502	GATTCCATTCSATTCCATTC	1e-07	-16.78	0	7	0.0012	2.9	0.0001
M04740_2.00:EHF:ELF1:ELF2:ELF3:ELF4:ELF5:ELK1:ELK3:ELK4:ERF:ERG:ETS1:ETS2:ETV1:ETV2:ETV3:ETV3L:ETV4:ETV5:ETV6:ETV7:FEV:FLI1:GABPA:SPDEF	WACCCGGAAGTR	1e-07	-16.76	0	126	0.0218	471.5	0.0131
M02385_2.00:MYRF	TGGTACCA	1e-07	-16.72	0	75	0.013	236.1	0.0065
M07930_2.00:CTCFL	GGCGCCCCCTGGYGG	1e-07	-16.63	0	34	0.0059	72.7	0.002
M09051_2.00:ELF1:ELF2:ELF4:ELK1:ELK3:ELK4:ERF:ERG:ETS1:ETS2:ETV1:ETV2:ETV3:ETV3L:ETV4:ETV5:FEV:FLI1:GABPA	ACCGGAAGTGV	1e-07	-16.62	0	156	0.027	619.3	0.0172
M06185_2.00:ELF1:ELF2:ELF4:ELK1:ELK3:ELK4:ERF:ERG:ETS1:ETS2:ETV1:ETV2:ETV3:ETV3L:ETV4:ETV5:ETV6:ETV7:FEV:FLI1:GABPA	ACCGGAAGT	1e-07	-16.62	0	142	0.0246	550.1	0.0152
M01972_2.00:ELF1:ELF2:ELF4:ELK1:ELK3:ELK4:ERF:ERG:ETS1:ETS2:ETV1:ETV2:ETV3:ETV3L:ETV4:ETV5:ETV6:FEV:FLI1:GABPA	CCGGAAGT	1e-07	-16.61	0	161	0.0278	644.5	0.0179
M08885_2.00:CTCFL	BRGCGCCCCCTGSYGGC	1e-07	-16.52	0	37	0.0064	84	0.0023
M09804_2.00:TFAP4	RMCAGCTGC	1e-07	-16.49	0	1945	0.3364	10982.9	0.3042
M02183_2.00:CDX1:CDX2:CDX4	GTAATWAA	1e-07	-16.4	0	821	0.142	4296.4	0.119
M03815_2.00:ALX1:ALX3:ALX4:ARX:BARHL1:BARHL2:DRGX:ESX1:EVX1:EVX2:GBX1:GBX2:HESX1:LBX1:LBX2:MEOX1:MEOX2:MIXL1:MSX1:MSX2:PHOX2A:PHOX2B:PROP1:PRRX1:PRRX2:RAX:RAX2:SHOX:SHOX2:TLX1:TLX3:UNCX:VSX1:VSX2	NTAATTAG	1e-07	-16.36	0	1569	0.2714	8716.1	0.2414
M04181_2.00:NEUROG2:NEUROG3	RACATATGTY	1e-07	-16.34	0	454	0.0785	2212.3	0.0613
M07894_2.00:CTCF	SBRGCGCCCCCTGGTGG	1e-07	-16.23	0	37	0.0064	84.4	0.0023
M03275_2.00:HOXA10:HOXA11:HOXA9:HOXB9:HOXC10:HOXC11:HOXC12:HOXC9:HOXD10:HOXD11:HOXD12:HOXD9	NTTTTATKRCY	1e-07	-16.17	0	1508	0.2609	8357.8	0.2315
M04089_2.00:MITF:TFEB	ANCATGTGACN	1e-07	-16.16	0	398	0.0688	1906.1	0.0528
M05746_2.00:NFIA:NFIB:NFIC:NFIX	NTTGGCDNNDTGCCARN	1e-06	-16.05	0	62	0.0107	184.6	0.0051
M10503_2.00:ELF1:ELF2:ELF4:ELK1:ELK3:ELK4:ERF:ERG:ETS1:ETS2:ETV1:ETV2:ETV3:ETV3L:ETV4:ETV5:FEV:FLI1:GABPA	CMGGAAGTSAB	1e-06	-15.99	0	564	0.0976	2836.8	0.0786
M10134_2.00:MZF1	KGGBGAGGGGGAA	1e-06	-15.96	0	453	0.0784	2214.4	0.0613
M04931_2.00:CRX:DMBX1:DPRX:GSC:GSC2:OTX1:OTX2:PITX1:PITX2:PITX3:TPRX1	CTAATCCC	1e-06	-15.91	0	1287	0.2226	7047.7	0.1952
M06319_2.00:CRX:DMBX1:DPRX:GSC:GSC2:OTX1:OTX2:PITX1:PITX2:PITX3:TPRX1	TTAATCC	1e-06	-15.89	0	1198	0.2072	6520.7	0.1806
M06521_2.00:CRX:DMBX1:DPRX:GSC:GSC2:OTX1:OTX2:PITX1:PITX2:PITX3:TPRX1	TTAATCC	1e-06	-15.89	0	1198	0.2072	6520.7	0.1806
M06192_2.00:ELF1:ELF2:ELF4:ELK1:ELK3:ELK4:ERF:ERG:ETS1:ETS2:ETV1:ETV2:ETV3:ETV3L:ETV4:ETV5:ETV6:FEV:FLI1:GABPA	ACCGGAART	1e-06	-15.87	0	163	0.0282	662.5	0.0184
M10562_2.00:FOXO4	ATAAACAANYH	1e-06	-15.84	0	1526	0.264	8478	0.2348
M04744_2.00:EHF:ELF1:ELF2:ELF3:ELF4:ELF5:ELK1:ELK3:ELK4:ERF:ERG:ETS1:ETS2:ETV1:ETV2:ETV3:ETV3L:ETV4:ETV5:ETV6:ETV7:FEV:FLI1:GABPA:SPDEF	WAMCCGGAAGTR	1e-06	-15.65	0	137	0.0237	535.2	0.0148
M07888_2.00:CTCF	CGCCCYCTGGTGGCC	1e-06	-15.64	0	56	0.0097	161.9	0.0045
M07913_2.00:CTCF	GCGCCCCCTGGTGGC	1e-06	-15.59	0	54	0.0093	153.8	0.0043
M07921_2.00:CTCF	CGCCMCCTGGTGGCC	1e-06	-15.59	0	54	0.0093	153.1	0.0042
M00254_2.00:FOXC1:FOXC2:FOXD1:FOXD2:FOXD3:FOXD4:FOXD4L1:FOXD4L3:FOXD4L4:FOXD4L5:FOXD4L6:FOXE1:FOXF1:FOXF2:FOXG1:FOXI1:FOXI3:FOXK2:FOXL1:FOXL2:FOXS1	AATAAACANN	1e-06	-15.5	0	1625	0.2811	9085.4	0.2517
M07793_2.00:MAX	DGCACGTGGCY	1e-06	-15.48	0	521	0.0901	2605.2	0.0722
M07873_2.00:CTCF	CNVBRGCGCCCCCTGGTGGCC	1e-06	-15.45	0	21	0.0036	33.5	0.0009
M03017_2.00:FOXI1:FOXI2:FOXI3:FOXJ1:FOXJ2:FOXJ3:FOXK2:FOXP3	RTAAACAA	1e-06	-15.4	0	1572	0.2719	8770.1	0.2429
M08238_2.00:CTCF	GCGCCCCCTGSTGGC	1e-06	-15.34	0	27	0.0047	52.9	0.0015
M11243_2.00:RELA	GGGTTTTTCCV	1e-06	-15.25	0	89	0.0154	309.4	0.0086
M08142_2.00:IRF1:IRF2	AAAVWGAAAGTGAAAGTAAAN	1e-06	-15.24	0	26	0.0045	49	0.0014
M08223_2.00:ESR1:ESR2:HNF4A:HNF4G:NR1D1:NR1D2:NR1H2:NR1H3:NR1H4:NR2C1:NR2C2:NR2F1:NR2F2:NR2F6:NR4A1:NR4A2:NR4A3:NR5A2:NR6A1:PPARA:PPARD:PPARG:RARA:RARB:RARG:RORA:RORB:RORC:RXRA:RXRB:RXRG:THRA:THRB	AAAGGTCA	1e-06	-15.24	0	1546	0.2674	8620.4	0.2388
M03129_2.00:HOXA13:HOXB13:HOXC13:HOXD13	DTTTTATTGG	1e-06	-15.22	0	698	0.1207	3619.7	0.1003
M04562_2.00:ZNF449	AMGCCCAACC	1e-06	-15.16	0	384	0.0664	1848.4	0.0512
M05414_2.00:PAX2:PAX4:PAX6	DYACGCWTSANTGCRCN	1e-06	-15.14	0	52	0.009	148	0.0041
M07863_2.00:CTCF	YRGCGCCCCCTGGTGG	1e-06	-15.09	0	44	0.0076	115.1	0.0032
M03112_2.00:ARX:BARHL1:BARHL2:BARX1:BARX2:BSX:DLX1:DLX2:DLX3:DLX4:DLX5:DLX6:EN1:EN2:GBX1:GBX2:GSX1:GSX2:HOXA1:HOXA2:HOXA3:HOXB1:HOXB2:HOXB3:HOXD1:HOXD3:ISX:LHX1:LHX5:MEOX1:MNX1:MSX1:MSX2:NANOG:NANOGP8:NKX1-1:NKX1-2:PDX1:PROP1:SHOX:SHOX2:UNCX:VAX1:VAX2:VSX2	NTAATTRB	1e-06	-15.07	0	1262	0.2183	6928.7	0.1919
M00740_2.00:RBPJ	HDGTTCCCAC	1e-06	-15.04	0	2484	0.4297	14344.2	0.3973
M02144_2.00:CRX:DMBX1:DPRX:GSC:GSC2:OTX1:OTX2:PITX1:PITX2:PITX3:TPRX1	VTTAATCCYH	1e-06	-15.01	0	1243	0.215	6817.5	0.1888
M01802_2.00:XBP1	NHNACGTRD	1e-06	-14.99	0	2205	0.3814	12631.7	0.3499
M01491_2.00:EHF:ELF1:ELF2:ELF3:ELF4:ELF5:ETV6:ETV7	DNSCGGAART	1e-06	-14.98	0	2054	0.3553	11708.3	0.3243
M07879_2.00:CTCF	GCGCCCCCTGGTGGC	1e-06	-14.93	0	41	0.0071	104.1	0.0029
M02996_2.00:ELF1:ELF2:ELF4:ELK1:ELK3:ELK4:ERF:ERG:ETS1:ETS2:ETV1:ETV2:ETV3:ETV3L:ETV4:ETV5:FEV:FLI1:GABPA	ACCGGAAGTR	1e-06	-14.86	0	124	0.0214	479.3	0.0133
M07550_2.00:CTCF	SYGCCMCCTRSTGGC	1e-06	-14.85	0	92	0.0159	326.2	0.009
M05542_2.00:IRF4:IRF8	NCGAAACYGAAACYR	1e-06	-14.81	0	54	0.0093	157.8	0.0044
M07684_2.00:ZNF197	CYTGTTCTTGWCTTT	1e-06	-14.77	0	383	0.0663	1850.5	0.0513
M03078_2.00:ARX:BARHL1:BARHL2:BARX1:BARX2:BSX:DLX1:DLX2:DLX3:DLX4:DLX5:DLX6:EMX2:EN1:EN2:GBX1:GBX2:GSX1:GSX2:HOXA1:HOXA2:HOXA3:HOXB1:HOXB2:HOXB3:HOXD1:HOXD3:ISX:LHX1:LHX5:MEOX1:MNX1:MSX1:MSX2:NANOG:NANOGP8:NKX1-1:NKX1-2:PDX1:PHOX2A:PHOX2B:PROP1:SHOX:SHOX2:UNCX:VAX1:VAX2:VSX2	NTAATTRB	1e-06	-14.75	0	1186	0.2052	6488.9	0.1797
M03545_2.00:SOX1:SOX10:SOX11:SOX12:SOX13:SOX14:SOX15:SOX17:SOX18:SOX2:SOX21:SOX3:SOX30:SOX4:SOX5:SOX6:SOX7:SOX8:SOX9:SRY	TGAATRDHTATTCA	1e-06	-14.74	0	35	0.0061	82.6	0.0023
M06190_2.00:ELF1:ELF2:ELF4:ELK1:ELK3:ELK4:ERF:ERG:ETS1:ETS2:ETV1:ETV2:ETV3:ETV3L:ETV4:ETV5:FEV:FLI1:GABPA	CCGGAAAT	1e-06	-14.73	0	181	0.0313	767.6	0.0213
M07876_2.00:CTCF	GCGCCCCCTGGTGGC	1e-06	-14.7	0	50	0.0086	141.2	0.0039
M11306_2.00:SOX1:SOX10:SOX11:SOX12:SOX13:SOX14:SOX15:SOX17:SOX18:SOX2:SOX21:SOX3:SOX30:SOX4:SOX5:SOX6:SOX7:SOX8:SOX9:SRY	RAACAAAGGVM	1e-06	-14.66	0	1331	0.2302	7354.4	0.2037
M07875_2.00:CTCF	GCGCCCCCTGGTGGC	1e-06	-14.65	0	43	0.0074	113.7	0.0032
M05076_2.00:HOXA10:HOXA11:HOXA9:HOXB9:HOXC10:HOXC11:HOXC12:HOXC9:HOXD10:HOXD11:HOXD12:HOXD9	DTTTTATKRCY	1e-06	-14.58	0	785	0.1358	4139.1	0.1146
M04503_2.00:ZNF75A:ZNF75D	MGCTTTTCCCACAM	1e-06	-14.54	0	60	0.0104	184.5	0.0051
M02897_2.00:ZNF75A:ZNF75D	TGTGGGAAAAGC	1e-06	-14.51	0	70	0.0121	228.4	0.0063
M11291_2.00:NFIA:NFIB:NFIC:NFIX	TTGGCANNDHKCCAA	1e-06	-14.5	0	74	0.0128	246.2	0.0068
M04444_2.00:SNAI1	YGCACCTGCT	1e-06	-14.49	0	890	0.154	4753.3	0.1317
M09691_2.00:RELA	BGGRTTTYCCC	1e-06	-14.46	0	531	0.0919	2685.3	0.0744
M09242_2.00:IRF1:IRF2	RAAANTGAAASTGAAASTRA	1e-06	-14.38	0	25	0.0043	48.6	0.0013
M04193_2.00:ATOH7	AMCATATGKY	1e-06	-14.24	0	583	0.1008	2986.2	0.0827
M04968_2.00:BARX1:BARX2:BSX:EMX1:EMX2:EN1:EN2:EVX1:EVX2:GBX1:GBX2:GSX1:GSX2:HMX1:HMX2:HMX3:HOXA1:HOXA2:HOXA3:HOXA4:HOXA5:HOXA6:HOXA7:HOXA9:HOXB1:HOXB2:HOXB3:HOXB4:HOXB5:HOXB6:HOXB7:HOXB8:HOXB9:HOXC4:HOXC5:HOXC6:HOXC8:HOXC9:HOXD1:HOXD3:HOXD4:HOXD8:HOXD9:ISX:MEOX1:MEOX2:MNX1:NKX1-1:NKX1-2:NOTO:OTP:PDX1:VAX1:VAX2:VENTX	STAATTAC	1e-06	-14.15	0	1320	0.2283	7307.5	0.2024
M02712_2.00:RELA	SGGGTTTTTCCS	1e-06	-14.13	0	162	0.028	677.9	0.0188
M03294_2.00:PAX2	CGTCACGCTTGABTGMNC	1e-06	-14.08	0	5	0.0009	0.8	0
M09827_2.00:EPAS1	ACGTGBGN	1e-06	-14.06	0	2100	0.3633	12029.9	0.3332
M07767_2.00:ZNF736	AAAARCCCCAGA	1e-06	-14.06	0	72	0.0125	240.1	0.0066
M10019_2.00:MAF:MAFA:MAFB:MAFG:MAFK:NRL	CRCTGACSABA	1e-06	-14.02	0	1003	0.1735	5431.4	0.1504
M03314_2.00:POU3F2	WTATGCWAATTA	1e-06	-14	0	219	0.0379	975.1	0.027
M05620_2.00:NR1I2:NR1I3:VDR	AAAGTTCGY	1e-06	-13.87	0	748	0.1294	3945.4	0.1093
M08738_2.00:ATOH1	AGCAGATGG	1e-05	-13.8	0	1058	0.183	5763.3	0.1596
M08779_2.00:ATOH1	AGCAGATGG	1e-05	-13.8	0	1058	0.183	5763.3	0.1596
M03443_2.00:PAX1:PAX2:PAX3:PAX5:PAX6:PAX7:PAX8:PAX9	RNKCANTSAWGCGTGACS	1e-05	-13.79	0	11	0.0019	10.2	0.0003
M10469_2.00:EBF1:EBF2:EBF3:EBF4	VDCDABTCCCYAGGGARBDKGB	1e-05	-13.79	0	11	0.0019	10.9	0.0003
M03282_2.00:HOXA10:HOXA11:HOXA5:HOXA6:HOXA7:HOXA9:HOXB5:HOXB6:HOXB8:HOXB9:HOXC10:HOXC11:HOXC5:HOXC6:HOXC8:HOXC9:HOXD10:HOXD11:HOXD8:HOXD9	TTTTATGGS	1e-05	-13.78	0	1458	0.2522	8148.6	0.2257
M11428_2.00:POU2AF1	ATATGCAAATC	1e-05	-13.76	0	189	0.0327	821.1	0.0227
M03043_2.00:FOXC1:FOXC2:FOXD1:FOXD2:FOXD3:FOXD4:FOXD4L1:FOXD4L3:FOXD4L4:FOXD4L5:FOXD4L6:FOXE1:FOXE3:FOXF1:FOXF2:FOXG1:FOXI1:FOXI3:FOXJ3:FOXL1:FOXL2:FOXS1	GTAAACA	1e-05	-13.69	0	2647	0.4579	15414.9	0.427
M03955_2.00:RELA	KGGGAATTCCCM	1e-05	-13.64	0	59	0.0102	185.5	0.0051
M07881_2.00:CTCF	CGCCCCCTGGTGGCC	1e-05	-13.63	0	47	0.0081	134.1	0.0037
M09809_2.00:HIF1A	GCACGT	1e-05	-13.53	0	2065	0.3572	11839.9	0.328
M08748_2.00:ASCL1:ASCL2	CTGCASCTGCYBCY	1e-05	-13.48	0	363	0.0628	1765.4	0.0489
M03228_2.00:HOXA10:HOXA11:HOXA6:HOXA9:HOXB6:HOXB8:HOXB9:HOXC10:HOXC11:HOXC12:HOXC6:HOXC8:HOXC9:HOXD10:HOXD11:HOXD12:HOXD8:HOXD9	TTTTTATGGS	1e-05	-13.47	0	1732	0.2996	9815	0.2719
M07862_2.00:CTCF	VBRGCGCCCCCTGGTGGCCRN	1e-05	-13.47	0	26	0.0045	54.7	0.0015
M07914_2.00:CTCF	GYGCCMYCTGGTGGC	1e-05	-13.44	0	61	0.0106	195.2	0.0054
M07870_2.00:CTCF	GCGCCCYCTGGTGGC	1e-05	-13.41	0	55	0.0095	169.4	0.0047
M04907_2.00:ARX:BARHL1:BARHL2:BARX1:BARX2:BSX:DLX1:DLX2:DLX3:DLX4:DLX5:DLX6:EMX2:EN1:EN2:GBX1:GBX2:GSX1:GSX2:HOXA1:HOXA2:HOXA3:HOXB1:HOXB2:HOXB3:HOXD1:HOXD3:ISX:LHX1:LHX5:MEOX1:MNX1:MSX1:MSX2:NANOG:NANOGP8:NKX1-1:NKX1-2:PDX1:PHOX2A:PHOX2B:PROP1:SHOX:SHOX2:UNCX:VAX1:VAX2:VSX2	VTAATTGS	1e-05	-13.41	0	1231	0.2129	6804.2	0.1885
M07874_2.00:CTCF	RGCGCCCCCTGGTGG	1e-05	-13.41	0	46	0.008	131.3	0.0036
M10641_2.00:CRX:DMBX1:DPRX:GSC:GSC2:OTX1:OTX2:PITX1:PITX2:PITX3:TPRX1	GACACTAATCY	1e-05	-13.4	0	198	0.0343	873.3	0.0242
M08095_2.00:ZBTB7A	BSCACTTCCGGSN	1e-05	-13.4	0	180	0.0311	779.3	0.0216
M00771_2.00:ZKSCAN1	DNNYRYRNNH	1e-05	-13.39	0	2223	0.3845	12813.8	0.3549
M03501_2.00:SOX1:SOX10:SOX11:SOX12:SOX13:SOX14:SOX15:SOX17:SOX18:SOX2:SOX21:SOX3:SOX30:SOX4:SOX5:SOX6:SOX7:SOX8:SOX9:SRY	DAACAATRG	1e-05	-13.38	0	1444	0.2498	8080.3	0.2238
M04451_2.00:ZNF384	TTTTTYNNNNBNNNNNRAAAAA	1e-05	-13.37	0	136	0.0235	554.1	0.0153
M09533_2.00:EHF:ELF1:ELF2:ELF3:ELF4:ELF5:ETV6:ETV7:FEV	AVCAGGAAGT	1e-05	-13.33	0	1114	0.1927	6112	0.1693
M09877_2.00:ATOH1	SCAGCTGGTG	1e-05	-13.28	0	1148	0.1986	6315.6	0.1749
M07898_2.00:CTCF	CGCCCCCTGGTGGC	1e-05	-13.26	0	69	0.0119	232.9	0.0065
M07958_2.00:ELF1:ELF2:ELF4:ELK1:ELK3:ELK4:ERF:ERG:ETS1:ETS2:ETV1:ETV2:ETV3:ETV3L:ETV4:ETV5:FEV:FLI1:GABPA	GRCCGGAAGTG	1e-05	-13.22	0	167	0.0289	714.2	0.0198
M05690_2.00:PAX1:PAX2:PAX3:PAX5:PAX6:PAX7:PAX8:PAX9	BCRNTCAWGCGTGACSN	1e-05	-13.18	0	17	0.0029	26.4	0.0007
M07904_2.00:CTCF	GCGCCCYCTGGTGGC	1e-05	-13.17	0	50	0.0086	149.9	0.0042
M04934_2.00:HOXA10:HOXA11:HOXA5:HOXA6:HOXA7:HOXA9:HOXB5:HOXB6:HOXB8:HOXB9:HOXC10:HOXC11:HOXC5:HOXC6:HOXC8:HOXC9:HOXD10:HOXD11:HOXD8:HOXD9	SBTTWATKGC	1e-05	-13.16	0	1469	0.2541	8239.6	0.2282
M08721_2.00:MYF5:MYF6:MYOD1:MYOG	CHGCAGCTGTCCY	1e-05	-13.15	0	437	0.0756	2185.4	0.0605
M08755_2.00:MYF5:MYF6:MYOD1:MYOG	CHGCAGCTGTCCY	1e-05	-13.15	0	437	0.0756	2185.4	0.0605
M04974_2.00:HOXA10:HOXA4:HOXA5:HOXA6:HOXA7:HOXA9:HOXB4:HOXB5:HOXB6:HOXB7:HOXB8:HOXB9:HOXC10:HOXC4:HOXC5:HOXC6:HOXC8:HOXC9:HOXD10:HOXD4:HOXD8:HOXD9:MNX1:PDX1	VYTAATTACC	1e-05	-13.13	0	995	0.1721	5414.4	0.15
M00304_2.00:BARX1:BARX2:BSX:EMX1:EMX2:EN1:EN2:EVX1:EVX2:GBX1:GBX2:GSX1:GSX2:HMX1:HMX2:HMX3:HOXA1:HOXA2:HOXA3:HOXA4:HOXA5:HOXB1:HOXB2:HOXB3:HOXB4:HOXB5:HOXC4:HOXC5:HOXD1:HOXD3:HOXD4:LBX2:MEOX1:MEOX2:MNX1:NANOG:NANOGP8:NKX1-1:NKX1-2:PDX1:TLX2:VENTX	AATATATAY	1e-05	-13.07	0	1180	0.2041	6513.8	0.1804
M09182_2.00:CRX:DMBX1:DPRX:GSC:GSC2:OTX1:OTX2:PITX1:PITX2:PITX3:TPRX1	SYTAATCCCT	1e-05	-13.06	0	887	0.1534	4781	0.1324
M03186_2.00:ALX1:ALX3:ALX4:ARX:BARHL1:BARHL2:BARX1:BARX2:BSX:DLX1:DLX2:DLX3:DLX4:DLX5:DLX6:DRGX:EMX1:EMX2:EN1:EN2:ESX1:EVX1:EVX2:GBX1:GBX2:GSX1:GSX2:HESX1:HMX1:HMX2:HMX3:HOXA1:HOXA2:HOXA3:HOXB1:HOXB2:HOXB3:HOXD1:HOXD3:ISX:LBX1:LBX2:LHX1:LHX2:LHX3:LHX4:LHX5:LHX9:MEOX1:MEOX2:MIXL1:MNX1:MSX1:MSX2:NANOG:NANOGP8:NKX1-1:NKX1-2:NOBOX:OTP:PDX1:PHOX2A:PHOX2B:PROP1:PRRX1:PRRX2:RAX:RAX2:SEBOX:SHOX:SHOX2:UNC…	BTAATTGG	1e-05	-13.03	0	1238	0.2141	6860.1	0.19
M08854_2.00:PRDM1	YCACTTTCACTTTC	1e-05	-13	0	120	0.0208	478.2	0.0132
M08995_2.00:PRDM1	YCACTTTCACTTTC	1e-05	-13	0	120	0.0208	478.2	0.0132
M04077_2.00:USF2	RCCATGTGACM	1e-05	-12.93	0	281	0.0486	1325.2	0.0367
M08055_2.00:ASCL1:ASCL2	SSAGCAGCTGGNV	1e-05	-12.91	0	390	0.0675	1927.5	0.0534
M07918_2.00:CTCF	GCGCCCCCTGGTGG	1e-05	-12.87	0	57	0.0099	181.8	0.005
M08735_2.00:NEUROD1:NEUROD2:NEUROD4:NEUROD6	RACAGATGGY	1e-05	-12.87	0	642	0.1111	3361.3	0.0931
M08764_2.00:NEUROD1:NEUROD2:NEUROD4:NEUROD6	RACAGATGGY	1e-05	-12.87	0	642	0.1111	3361.3	0.0931
M05831_2.00:MYF5:MYF6:MYOG	YAACAGTTGWY	1e-05	-12.78	0	666	0.1152	3502.6	0.097
M05783_2.00:SOX1:SOX10:SOX11:SOX12:SOX13:SOX14:SOX15:SOX17:SOX18:SOX2:SOX21:SOX3:SOX30:SOX4:SOX5:SOX6:SOX7:SOX8:SOX9:SRY	NCATTGTNNG	1e-05	-12.77	0	2141	0.3704	12339	0.3418
M07916_2.00:CTCF	YRSYGCCMYCTRGTGGC	1e-05	-12.76	0	44	0.0076	126.7	0.0035
M01494_2.00:EHF:ELF1:ELF2:ELF3:ELF4:ELF5:ELK1:ELK3:ELK4:ERF:ERG:ETS1:ETS2:ETV1:ETV2:ETV3:ETV3L:ETV4:ETV5:ETV6:ETV7:FEV:FLI1:GABPA:SPDEF	WNCCGGAAGT	1e-05	-12.76	0	1434	0.2481	8045.5	0.2229
M07896_2.00:CTCF	RGCGCCCCCTGGTGG	1e-05	-12.75	0	60	0.0104	195.3	0.0054
M10880_2.00:IRF1:IRF2	CTTTCACTTTCANT	1e-05	-12.74	0	90	0.0156	334.6	0.0093
M03964_2.00:RUNX1:RUNX2:RUNX3	WAACCGCAAAA	1e-05	-12.69	0	162	0.028	695.7	0.0193
M07883_2.00:CTCF	BRGCGCCCCCTGGTGGC	1e-05	-12.61	0	31	0.0054	75.6	0.0021
M03333_2.00:IRF5	AACCGAAACYA	1e-05	-12.58	0	55	0.0095	175	0.0048
M07995_2.00:PAX1:PAX2:PAX3:PAX5:PAX6:PAX7:PAX8:PAX9	GCAGCCAAGCGTGAC	1e-05	-12.56	0	32	0.0055	79.3	0.0022
M04452_2.00:ZNF384	TTTTTTTNNNNNNNNRAAAAAA	1e-05	-12.56	0	131	0.0227	538.1	0.0149
M07683_2.00:ZNF75A:ZNF75D	GTGGGAAAGCCT	1e-05	-12.52	0	65	0.0112	219	0.0061
M07866_2.00:CTCF	GCGCCCYCTGGTGGC	1e-05	-12.48	0	56	0.0097	179.7	0.005
M08105_2.00:RBPJ	NNTTCCCASV	1e-05	-12.48	0	1765	0.3053	10058.9	0.2786
M05965_2.00:NHLH1:NHLH2	MAAARCACCTGMGCC	1e-05	-12.46	0	129	0.0223	529.5	0.0147
M02283_2.00:SRF	CCAAATHNGG	1e-05	-12.46	0	1622	0.2806	9192	0.2546
M02384_2.00:MYRF	TGGTACCR	1e-05	-12.38	0	82	0.0142	299.8	0.0083
M00736_2.00:RBPJ	NNDTTCCCAC	1e-05	-12.35	0	3385	0.5855	20089.6	0.5565
M08739_2.00:BHLHA15	GCAGCAGCTGG	1e-05	-12.35	0	425	0.0735	2136.7	0.0592
M08774_2.00:BHLHA15	GCAGCAGCTGG	1e-05	-12.35	0	425	0.0735	2136.7	0.0592
M00836_2.00:FOXC2:FOXJ3:FOXK2:FOXP1:FOXP2:FOXP3:FOXP4	NGTAAACAAN	1e-05	-12.34	0	1531	0.2648	8647.9	0.2395
M07925_2.00:CTCF	RGCGCCCCCTGGTGG	1e-05	-12.31	0	58	0.01	189.6	0.0053
M07889_2.00:CTCF	CGCCCYCTGGTGGC	1e-05	-12.27	0	72	0.0125	253.4	0.007
M07924_2.00:CTCF	RGCGCCCYCTGGTGG	1e-05	-12.22	0.0001	61	0.0106	203.2	0.0056
M08852_2.00:ZNF582	GWTGMTTSCATTCVAHTCCATTCS	1e-05	-12.2	0.0001	7	0.0012	4.6	0.0001
M09681_2.00:CRX:DMBX1:DPRX:GSC:GSC2:OTX1:OTX2:PITX1:PITX2:PITX3:TPRX1	YTAATCCS	1e-05	-12.14	0.0001	1445	0.25	8137.4	0.2254
M05358_2.00:SIX3:SIX6	VSGTATCRYN	1e-05	-12.14	0.0001	1367	0.2365	7668.9	0.2124
M02970_2.00:ELF1:ELF2:ELF4:ELK1:ELK3:ELK4:ERF:ERG:ETS1:ETS2:ETV1:ETV2:ETV3:ETV3L:ETV4:ETV5:FEV:FLI1:GABPA	ACCGGAAGTG	1e-05	-12.11	0.0001	129	0.0223	533.3	0.0148
M11309_2.00:SOX1:SOX10:SOX11:SOX12:SOX13:SOX14:SOX15:SOX17:SOX18:SOX2:SOX21:SOX3:SOX30:SOX4:SOX5:SOX6:SOX7:SOX8:SOX9:SRY	YWAACAATAN	1e-05	-12.09	0.0001	1036	0.1792	5694.4	0.1577
M10203_2.00:RREB1	CCCCAAACCACCCC	1e-05	-12.08	0.0001	137	0.0237	574.3	0.0159
M03945_2.00:PAX1:PAX2:PAX3:PAX5:PAX6:PAX7:PAX8:PAX9	RTCATGCGTGACG	1e-05	-12.04	0.0001	39	0.0067	109.6	0.003
M07895_2.00:CTCF	VBRGCGCCCCCTRGTGGC	1e-05	-12	0.0001	44	0.0076	130.2	0.0036
M07906_2.00:CTCF	DMYRSYGCCMYCTRGTGG	1e-05	-12	0.0001	44	0.0076	130.8	0.0036
M07911_2.00:CTCF	RGCGCCCCCTGGTGGCCR	1e-05	-11.92	0.0001	26	0.0045	60	0.0017
M10153_2.00:CTCF	NNNYNGCCACYAGRKGGCRC	1e-05	-11.88	0.0001	54	0.0093	174.6	0.0048
M05135_2.00:CRX:DMBX1:DPRX:GSC:GSC2:OTX1:OTX2:PITX1:PITX2:PITX3:TPRX1	CTAATCCS	1e-05	-11.85	0.0001	1338	0.2314	7506.6	0.2079
M05421_2.00:PAX3:PAX7	NTAATCAATTAN	1e-05	-11.84	0.0001	185	0.032	827.9	0.0229
M08289_2.00:CTCF	RGCGCCCCCTGSYGG	1e-05	-11.84	0.0001	48	0.0083	148.7	0.0041
M04780_2.00:ELF1:ELF2:ELF4:ELK1:ELK3:ELK4:ERF:ERG:ETS1:ETS2:ETV1:ETV2:ETV3:ETV3L:ETV4:ETV5:FEV:FLI1:GABPA	NRCCGGAAGYV	1e-05	-11.76	0.0001	300	0.0519	1451.7	0.0402
M04059_2.00:MITF:TFE3	NGTCACATGBY	1e-05	-11.73	0.0001	312	0.054	1518.9	0.0421
M04194_2.00:ATOH7	AMCATATGKY	1e-05	-11.73	0.0001	528	0.0913	2737.9	0.0758
M09651_2.00:T:TBX19	NTTMRCACNNNVSTGYKAANT	1e-05	-11.7	0.0001	41	0.0071	119.5	0.0033
M09062_2.00:ELF1:ELF2:ELF4:ELK1:ELK3:ELK4:ERF:ERG:ETS1:ETS2:ETV1:ETV2:ETV3:ETV3L:ETV4:ETV5:FEV:FLI1:GABPA	VRCAGGAAGKR	1e-05	-11.69	0.0001	1843	0.3188	10569.4	0.2928
M07885_2.00:CTCF	GCGCCCCCTGGTGGC	1e-05	-11.67	0.0001	48	0.0083	149.2	0.0041
M07869_2.00:CTCF	GCGCCCCCTGGTGGC	1e-05	-11.61	0.0001	47	0.0081	146	0.004
M07922_2.00:CTCF	CGCCCCCTGGTGG	0.0001	-11.46	0.0001	82	0.0142	307	0.0085
M05549_2.00:IRF9	DCGAAACCGAAACTD	0.0001	-11.45	0.0001	25	0.0043	57.6	0.0016
M10152_2.00:CTCF	NYGGCCASCAGGGGGCRSYV	0.0001	-11.37	0.0001	31	0.0054	80.9	0.0022
M07903_2.00:CTCF	CGCCMYCTRGTGG	0.0001	-11.35	0.0001	117	0.0202	481.6	0.0133
M00256_2.00:FOXC1:FOXC2:FOXD1:FOXD2:FOXD3:FOXD4:FOXD4L1:FOXD4L3:FOXD4L4:FOXD4L5:FOXD4L6:FOXE1:FOXF1:FOXF2:FOXG1:FOXI1:FOXI3:FOXK2:FOXL1:FOXL2:FOXP4:FOXS1	NNHWAATYACATN	0.0001	-11.25	0.0001	1478	0.2557	8375.9	0.232
M05821_2.00:TBX1:TBX10	KDAGGTGTGAAR	0.0001	-11.24	0.0001	251	0.0434	1192.6	0.033
M04794_2.00:ELF1:ELF2:ELF4:ELK1:ELK3:ELK4:ERF:ERG:ETS1:ETS2:ETV1:ETV2:ETV3:ETV3L:ETV4:ETV5:FEV:FLI1:GABPA	ACAGGAAGGAAGTR	0.0001	-11.23	0.0001	73	0.0126	266	0.0074
M05585_2.00:HNF4A:HNF4G:NR2E1	MRAAGTCAM	0.0001	-11.22	0.0001	1746	0.302	10001.2	0.277
M07997_2.00:PAX1:PAX2:PAX3:PAX5:PAX6:PAX7:PAX8:PAX9	CAGCSAAGCGTGACC	0.0001	-11.22	0.0001	38	0.0066	109.8	0.003
M07890_2.00:CTCF	YGCCMYCTRGTGG	0.0001	-11.19	0.0001	119	0.0206	493.1	0.0137
M10471_2.00:EHF:ELF1:ELF2:ELF3:ELF4:ELF5:ETV6:ETV7:SPIC	YTACTTCCTG	0.0001	-11.14	0.0001	109	0.0189	443.8	0.0123
M07956_2.00:ELF1:ELF2:ELF4:ELK1:ELK3:ELK4:ERF:ERG:ETS1:ETS2:ETV1:ETV2:ETV3:ETV3L:ETV4:ETV5:FEV:FLI1:GABPA	GGVRCCGGAAGTG	0.0001	-11.13	0.0001	82	0.0142	310.4	0.0086
M05536_2.00:IRF5	VCGAAACCGAAACY	0.0001	-11.12	0.0001	56	0.0097	188.2	0.0052
M04394_2.00:SNAI2	TGCACCTGTY	0.0001	-11.1	0.0001	809	0.1399	4389.2	0.1216
M07917_2.00:CTCF	SYGCCMYCTRGTGGC	0.0001	-11.08	0.0001	67	0.0116	240	0.0066
M04151_2.00:HAND2	AACACCTGCR	0.0001	-11.06	0.0002	613	0.106	3246.7	0.0899
M02780_2.00:MYF5:MYF6:MYOG	AACAGCTGTT	0.0001	-10.97	0.0002	143	0.0247	619.1	0.0171
M08966_2.00:CTCF	VBRGCGCCCCCTGGTGGCCR	0.0001	-10.93	0.0002	17	0.0029	31.3	0.0009
M10109_2.00:PRDM1	VAGRAAGKGAAAGG	0.0001	-10.91	0.0002	144	0.0249	626	0.0173
M10504_2.00:ELF1:ELF2:ELF4:ELK1:ELK3:ELK4:ERF:ERG:ETS1:ETS2:ETV1:ETV2:ETV3:ETV3L:ETV4:ETV5:FEV:FLI1:GABPA	CACTTCCGG	0.0001	-10.88	0.0002	147	0.0254	641.9	0.0178
M05550_2.00:IRF9	RCGAAACTGAAACTN	0.0001	-10.88	0.0002	43	0.0074	133	0.0037
M00190_2.00:GMEB1:GMEB2	YKACGYANN	0.0001	-10.84	0.0002	2171	0.3755	12619.1	0.3495
M03900_2.00:PAX6	TTYACGCWTGARTGCACAC	0.0001	-10.75	0.0002	5	0.0009	2.2	0.0001
M08906_2.00:ZNF281	BCCCCTCCCCCACCC	0.0001	-10.71	0.0002	245	0.0424	1169.6	0.0324
M09818_2.00:AHR	GVSTTGCGTGNSWVBRB	0.0001	-10.7	0.0002	168	0.0291	754.3	0.0209
M07880_2.00:CTCF	GCCCCCTGGTGGCCR	0.0001	-10.68	0.0002	52	0.009	173.1	0.0048
M04414_2.00:ZNF174	DGSCGATCACTYGCCA	0.0001	-10.67	0.0002	11	0.0019	14.6	0.0004
M05455_2.00:POU1F1	DTATGCAAATKAGB	0.0001	-10.65	0.0002	85	0.0147	330	0.0091
M05429_2.00:PAX2	NCGTCACGCWTGANYGMHCW	0.0001	-10.63	0.0002	4	0.0007	0.3	0
M05686_2.00:PAX1:PAX2:PAX3:PAX5:PAX6:PAX7:PAX8:PAX9	NGDKCRNTCAWGCGTGACSR	0.0001	-10.63	0.0002	4	0.0007	0.8	0
M11227_2.00:NFKB1:RELA:RELB	GGAAAGTCCCYTBYGC	0.0001	-10.62	0.0002	66	0.0114	238.4	0.0066
M11182_2.00:HNF4G:NR1H4:NR2C1:NR2C2:NR2F1:NR2F2:NR2F6:NR4A1:NR4A2:NR4A3:NR5A1:NR5A2:NR6A1:PPARA:PPARD:PPARG:RARA:RARB:RARG:RORA:RORB:RORC:RXRA:RXRB:RXRG:THRA:THRB	TSBRGCGCCCCCTGGTGGCC	0.0001	-10.54	0.0003	17	0.0029	32.2	0.0009
M05024_2.00:CRX:DMBX1:DPRX:GSC:GSC2:OTX1:OTX2:PITX1:PITX2:PITX3:TPRX1	HTAATCCSYH	0.0001	-10.46	0.0003	1326	0.2294	7495	0.2076
M07953_2.00:ELF1:ELF2:ELF4:ELK1:ELK3:ELK4:ERF:ERG:ETS1:ETS2:ETV1:ETV2:ETV3:ETV3L:ETV4:ETV5:FEV:FLI1:GABPA	VRCCGGAAGTG	0.0001	-10.45	0.0003	147	0.0254	647.5	0.0179
M07952_2.00:ELF1:ELF2:ELF4:ELK1:ELK3:ELK4:ERF:ERG:ETS1:ETS2:ETV1:ETV2:ETV3:ETV3L:ETV4:ETV5:FEV:FLI1:GABPA	VRCCGGAAGTG	0.0001	-10.41	0.0003	153	0.0265	679.7	0.0188
M07919_2.00:CTCF	RGCGCCCYCTGGTGG	0.0001	-10.36	0.0003	60	0.0104	212.9	0.0059
M04607_2.00:SNAI3	TGCACCTGTT	0.0001	-10.3	0.0003	913	0.1579	5032.7	0.1394
M08257_2.00:ZBTB18	NCGCAGCTGCGB	0.0001	-10.27	0.0003	153	0.0265	681.9	0.0189
M09470_2.00:PTF1A	NAACAGCTGT	0.0001	-10.25	0.0003	1719	0.2974	9884.2	0.2738
M05541_2.00:IRF4:IRF8	NCGAAACCGAAACYR	0.0001	-10.22	0.0003	23	0.004	54.9	0.0015
M09080_2.00:EHF:ELF1:ELF2:ELF3:ELF4:ELF5:ELK1:ELK3:ELK4:ERF:ERG:ETS1:ETS2:ETV1:ETV2:ETV3:ETV3L:ETV4:ETV5:ETV6:ETV7:FEV:FLI1:GABPA:SPDEF	TRNCAGGAAGTRRVT	0.0001	-10.17	0.0004	139	0.024	609.5	0.0169
M07864_2.00:CTCF	RGCGCCCYCTRGTGG	0.0001	-10.11	0.0004	67	0.0116	247.1	0.0068
M07884_2.00:CTCF	GCGCCCCCTGGTGGC	0.0001	-10.1	0.0004	52	0.009	177.7	0.0049
M10508_2.00:ELF1:ELF2:ELF4:ELK1:ELK3:ELK4:ERF:ERG:ETS1:ETS2:ETV1:ETV2:ETV3:ETV3L:ETV4:ETV5:FEV:FLI1:GABPA	CACTTCCGGYBC	0.0001	-10.09	0.0004	167	0.0289	758.3	0.021
M08268_2.00:ZNF273	BTCAGCAGCTGCTVYTK	0.0001	-10.07	0.0004	133	0.023	579.6	0.0161
M05408_2.00:HOXA3:HOXA4:HOXA5:HOXA6:HOXA7:HOXB3:HOXB4:HOXB5:HOXB6:HOXB7:HOXB8:HOXC4:HOXC5:HOXC6:HOXC8:HOXD3:HOXD4:HOXD8:PDX1	VHTAATTACS	0.0001	-10.07	0.0004	851	0.1472	4674.1	0.1295
M10888_2.00:IRF4:IRF8	KAAAMWGAAAVYA	0.0001	-10	0.0004	648	0.1121	3483.7	0.0965
M03448_2.00:NFKB1:NFKB2	AGGGGAWTCCCCT	0.0001	-9.999	0.0004	9	0.0016	10.4	0.0003
M03335_2.00:IRF4:IRF8	HCGAAACCGAAACT	0.0001	-9.963	0.0004	15	0.0026	27.5	0.0008
M10674_2.00:ALX1:ALX3:ALX4:ARX:BARHL1:BARHL2:BARX1:BARX2:BSX:DLX1:DLX2:DLX3:DLX4:DLX5:DLX6:DRGX:EMX1:EMX2:EN1:EN2:GBX1:GBX2:GSX1:GSX2:HMX1:HMX3:HOXA1:HOXA2:HOXA3:HOXB1:HOXB2:HOXB3:HOXD1:HOXD3:ISX:LHX1:LHX5:MEOX1:MEOX2:MNX1:MSX1:MSX2:NANOG:NANOGP8:NKX1-1:NKX1-2:PDX1:PHOX2A:PHOX2B:PROP1:PRRX1:PRRX2:SHOX:SHOX2:UNCX:VAX1:VAX2:VSX1:VSX2	AMGCCTGACKG	0.0001	-9.958	0.0004	332	0.0574	1668.3	0.0462
M07908_2.00:CTCF	NVYRGCGCCCCCTGGTGGCCR	0.0001	-9.943	0.0004	18	0.0031	37.8	0.001
M04442_2.00:SNAI1	YGCACCTGCY	0.0001	-9.849	0.0005	1111	0.1922	6230.1	0.1726
M07892_2.00:CTCF	RGYGCCCYCTRGTGG	0.0001	-9.812	0.0005	65	0.0112	240.5	0.0067
M07886_2.00:CTCF	GCGCCCYCTGGTGGC	0.0001	-9.79	0.0005	48	0.0083	161.5	0.0045
M07868_2.00:CTCF	SYGCCCYCTRGTGGC	0.0001	-9.726	0.0006	60	0.0104	217.3	0.006
M08113_2.00:ELF1:ELF2:ELF4:ELK1:ELK3:ELK4:ERF:ERG:ETS1:ETS2:ETV1:ETV2:ETV3:ETV3L:ETV4:ETV5:FEV:FLI1:GABPA	CCGGAAGTGGV	0.0001	-9.651	0.0006	149	0.0258	669.8	0.0186
M07891_2.00:CTCF	RGCGCCCCCTGGTGGCCR	0.0001	-9.637	0.0006	24	0.0042	60.9	0.0017
M04798_2.00:ELF1:ELF2:ELF4:ELK1:ELK3:ELK4:ERF:ERG:ETS1:ETS2:ETV1:ETV2:ETV3:ETV3L:ETV4:ETV5:FEV:FLI1:GABPA	ACAGGAAGGAAGTR	0.0001	-9.627	0.0006	68	0.0118	256.5	0.0071
M04733_2.00:ELF1:ELF2:ELF4:ELK1:ELK3:ELK4:ERF:ERG:ETS1:ETS2:ETV1:ETV2:ETV3:ETV3L:ETV4:ETV5:FEV:FLI1:GABPA	ACCGGAAGTR	0.0001	-9.626	0.0006	75	0.013	290.2	0.008
M02679_2.00:EHF:ELF1:ELF2:ELF3:ELF4:ELF5:ELK1:ELK3:ELK4:ERF:ERG:ETS1:ETS2:ETV1:ETV2:ETV3:ETV3L:ETV4:ETV5:ETV6:ETV7:FEV:FLI1:GABPA:SPDEF	CCGGAAG	0.0001	-9.594	0.0006	1727	0.2987	9966	0.276
M10513_2.00:ELF1:ELF2:ELF4:ELK1:ELK3:ELK4:ERF:ERG:ETS1:ETS2:ETV1:ETV2:ETV3:ETV3L:ETV4:ETV5:FEV:FLI1:GABPA	VACCGGAAGTV	0.0001	-9.581	0.0006	65	0.0112	242.4	0.0067
M02432_2.00:LCOR	VAYCGAAACT	0.0001	-9.518	0.0007	657	0.1136	3552.2	0.0984
M10748_2.00:PBX1:PBX2:PBX3:PBX4	ATCAATCAA	0.0001	-9.478	0.0007	1166	0.2017	6576.3	0.1822
M05449_2.00:POU2F2	WTATGCAAATK	0.0001	-9.444	0.0007	116	0.0201	500	0.0138
M04752_2.00:ELF1:ELF2:ELF4:ELK1:ELK3:ELK4:ERF:ERG:ETS1:ETS2:ETV1:ETV2:ETV3:ETV3L:ETV4:ETV5:FEV:FLI1:GABPA	NACCGGAAGTG	0.0001	-9.428	0.0007	58	0.01	210.3	0.0058
M07872_2.00:CTCF	RSYGCCMCCTGGTGG	0.0001	-9.4	0.0008	63	0.0109	234.7	0.0065
M01492_2.00:EHF:ELF1:ELF2:ELF3:ELF4:ELF5:ELK1:ELK3:ELK4:ERF:ERG:ETS1:ETS2:ETV1:ETV2:ETV3:ETV3L:ETV4:ETV5:ETV6:ETV7:FEV:FLI1:GABPA:SPDEF	DNCCGGAAGT	0.001	-9.191	0.0009	1903	0.3292	11063.9	0.3065
M05047_2.00:NKX2-1:NKX2-2:NKX2-3:NKX2-4:NKX2-5:NKX2-6:NKX2-8	STCAACGMB	0.001	-9.188	0.0009	1566	0.2709	9007.4	0.2495
M08794_2.00:BATF:BATF3	KASTCATAATGAAASTV	0.001	-9.177	0.0009	37	0.0064	116.8	0.0032
M08826_2.00:BATF:BATF3	KASTCATAATGAAASTV	0.001	-9.177	0.0009	37	0.0064	116.8	0.0032
M08087_2.00:CTCF	TRGYGCCCCCTRGTGGCCA	0.001	-9.175	0.0009	23	0.004	58.6	0.0016
M04754_2.00:ELF1:ELF2:ELF4:ELK1:ELK3:ELK4:ERF:ERG:ETS1:ETS2:ETV1:ETV2:ETV3:ETV3L:ETV4:ETV5:FEV:FLI1:GABPA	NRCCGGAAGTR	0.001	-9.152	0.001	242	0.0419	1183.7	0.0328
M11325_2.00:SOX1:SOX10:SOX11:SOX12:SOX13:SOX14:SOX15:SOX17:SOX18:SOX2:SOX21:SOX3:SOX30:SOX4:SOX5:SOX6:SOX7:SOX8:SOX9:SRY	VACAATDGA	0.001	-9.116	0.001	1516	0.2622	8707.2	0.2412
M10849_2.00:POU3F1	GRGGAATTAVAVTDS	0.001	-9.091	0.001	285	0.0493	1424.9	0.0395
M07920_2.00:CTCF	RSYGCCCYCTRGTGGCCA	0.001	-9.088	0.001	32	0.0055	95.2	0.0026
M04079_2.00:MITF:TFEC	AHCATGTGACY	0.001	-9.067	0.001	424	0.0733	2214.4	0.0613
M05529_2.00:IRF5:IRF6	ACCGAAACT	0.001	-9.063	0.001	46	0.008	157.7	0.0044
M00706_2.00:PAX2:PAX5:PAX6:PAX8	ACGCGTGACG	0.001	-9.014	0.0011	107	0.0185	458.8	0.0127
M03732_2.00:ELF1:ELF2:ELF4:ELK1:ELK3:ELK4:ERF:ERG:ETS1:ETS2:ETV1:ETV2:ETV3:ETV3L:ETV4:ETV5:ETV6:FEV:FLI1:GABPA	DACCGGAAGTG	0.001	-9.001	0.0011	79	0.0137	316	0.0088
M05859_2.00:SP1:SP3:SP4:SP5:SP8:SP9	DGCCMCGCCCMYW	0.001	-8.94	0.0012	316	0.0547	1602.3	0.0444
M07909_2.00:CTCF	ASYGCCATCTAGTGG	0.001	-8.905	0.0012	44	0.0076	149.3	0.0041
M04730_2.00:ELF1:ELF2:ELF4:ELK1:ELK3:ELK4:ERF:ERG:ETS1:ETS2:ETV1:ETV2:ETV3:ETV3L:ETV4:ETV5:FEV:FLI1:GABPA	NACCGGAAGTR	0.001	-8.831	0.0013	105	0.0182	450.3	0.0125
M07996_2.00:PAX1:PAX2:PAX3:PAX5:PAX6:PAX7:PAX8:PAX9	GCAGCSAAGCGTGAC	0.001	-8.776	0.0014	33	0.0057	101.6	0.0028
M04150_2.00:HAND2	AACACCTGCR	0.001	-8.734	0.0014	564	0.0976	3035.3	0.0841
M10108_2.00:PRDM1	RGRAAGTGAAAG	0.001	-8.73	0.0014	484	0.0837	2570.7	0.0712
M05436_2.00:PAX4	TTYACGCWTGAVYGMACA	0.001	-8.701	0.0015	7	0.0012	7.4	0.0002
M05348_2.00:NKX2-1:NKX2-2:NKX2-3:NKX2-4:NKX2-5:NKX2-6:NKX2-8	CTCAACGAS	0.001	-8.657	0.0016	285	0.0493	1434.1	0.0397
M09624_2.00:PAX1:PAX2:PAX3:PAX5:PAX6:PAX7:PAX8:PAX9	SCAGYCADGCATGAC	0.001	-8.61	0.0016	100	0.0173	427.3	0.0118
M04395_2.00:SNAI2	YGCACCTGYY	0.001	-8.532	0.0018	1100	0.1903	6223.1	0.1724
M00421_2.00:HOXA10:HOXA11:HOXA6:HOXA9:HOXB6:HOXB8:HOXB9:HOXC10:HOXC11:HOXC12:HOXC6:HOXC8:HOXC9:HOXD10:HOXD11:HOXD12:HOXD8:HOXD9	TTAATGAC	0.001	-8.514	0.0018	1485	0.2569	8550.7	0.2368
M07865_2.00:CTCF	MYRGCGCCCCCTGGTG	0.001	-8.498	0.0018	53	0.0092	194.2	0.0054
M07899_2.00:CTCF	VYRGCGCCMYCTRGTGGCCA	0.001	-8.475	0.0019	22	0.0038	57.1	0.0016
M04092_2.00:MSC:TCF21	CAACAGCTGTTA	0.001	-8.427	0.0019	154	0.0266	715.7	0.0198
M00372_2.00:NR2E3	AAAGATCA	0.001	-8.424	0.0019	117	0.0202	518	0.0143
M08999_2.00:ZNF281	CCCCTCCCCCACCCC	0.001	-8.41	0.002	148	0.0256	683.6	0.0189
M04878_2.00:GATA1:GATA2:GATA3:GATA4:GATA5:GATA6	WGATAACGATCW	0.001	-8.375	0.002	66	0.0114	258.2	0.0072
M03317_2.00:POU3F4	TATGCAAAT	0.001	-8.364	0.0021	356	0.0616	1844.1	0.0511
M08869_2.00:CTCF	BRGCGCCCCCTGGTGGCCR	0.001	-8.284	0.0022	20	0.0035	50.1	0.0014
M02801_2.00:MSC:TCF21	AACAGCTGTT	0.001	-8.281	0.0022	145	0.0251	669.7	0.0185
M07887_2.00:CTCF	RGCGCCCYCTGGTGGCCR	0.001	-8.265	0.0023	25	0.0043	70.1	0.0019
M08316_2.00:ZNF18	CCWGTTCACACC	0.001	-8.185	0.0024	246	0.0426	1226.9	0.034
M09622_2.00:PAX1:PAX2:PAX3:PAX5:PAX6:PAX7:PAX8:PAX9	GCAGCCAAGCRTGACH	0.001	-8.169	0.0025	28	0.0048	84	0.0023
M02719_2.00:SOX1:SOX10:SOX11:SOX12:SOX13:SOX14:SOX15:SOX17:SOX18:SOX2:SOX21:SOX3:SOX30:SOX4:SOX5:SOX6:SOX7:SOX8:SOX9:SRY	WAACAAT	0.001	-8.168	0.0025	1082	0.1872	6132.4	0.1699
M07897_2.00:CTCF	ASYGCCMYCTRGTGG	0.001	-8.167	0.0025	67	0.0116	265.2	0.0073
M07721_2.00:ZNF786	CTGGGRC	0.001	-8.167	0.0025	2518	0.4356	14914.8	0.4131
M06193_2.00:ELF1:ELF2:ELF4:ELK1:ELK3:ELK4:ERF:ERG:ETS1:ETS2:ETV1:ETV2:ETV3:ETV3L:ETV4:ETV5:FEV:FLI1:GABPA	ACCGGAAGTVV	0.001	-8.159	0.0025	69	0.0119	275.1	0.0076
M04161_2.00:NEUROD1:NEUROD2:NEUROD4:NEUROD6	RCCATATGYT	0.001	-8.12	0.0026	455	0.0787	2421.8	0.0671
M05259_2.00:ALX1:ALX3:ALX4:ARX:BARX1:BARX2:BSX:DLX2:DLX3:DRGX:EMX1:EMX2:EN1:EN2:ESX1:EVX1:EVX2:GBX1:GBX2:GSX1:GSX2:HESX1:HOXA2:HOXA3:HOXB2:HOXB3:HOXD3:ISX:LBX1:LBX2:LHX1:LHX2:LHX3:LHX4:LHX5:LHX6:LHX8:LHX9:LMX1A:LMX1B:MEOX1:MIXL1:MNX1:MSX1:MSX2:NKX1-1:NKX1-2:NOBOX:NOTO:OTP:PDX1:PHOX2A:PHOX2B:PROP1:PRRX1:PRRX2:RAX:RAX2:SEBOX:SHOX:SHOX2:UNCX:VAX1:VAX2:VSX1:VSX2:ZFHX2	STAATTGS	0.001	-8.119	0.0026	1370	0.237	7873.5	0.2181
M10328_2.00:ZNF718	DGGGGATTGCGC	0.001	-8.071	0.0027	19	0.0033	47.8	0.0013
M05543_2.00:IRF4:IRF8	HCGAAACCGAAACTA	0.001	-8.061	0.0027	9	0.0016	13.5	0.0004
M08227_2.00:PAX1:PAX2:PAX3:PAX5:PAX6:PAX7:PAX8:PAX9	GCAGCSAAGCGTGAC	0.001	-8.036	0.0028	24	0.0042	67.9	0.0019
M02122_2.00:CRX:DMBX1:GSC:OTX1:OTX2:TPRX1	MTAATCCV	0.001	-8.009	0.0029	1340	0.2318	7697.2	0.2132
M04928_2.00:CRX:DMBX1:DPRX:GSC:GSC2:OTX1:OTX2:PITX1:PITX2:PITX3:TPRX1	CTAATCCC	0.001	-8.009	0.0029	1340	0.2318	7697.2	0.2132
M05230_2.00:CRX:DMBX1:DPRX:GSC:GSC2:OTX1:OTX2:PITX1:PITX2:PITX3:TPRX1	CTAATCCC	0.001	-8.009	0.0029	1340	0.2318	7697.2	0.2132
M05044_2.00:NKX2-1:NKX2-2:NKX2-3:NKX2-4:NKX2-5:NKX2-6:NKX2-8	CTCAACGAC	0.001	-7.989	0.0029	300	0.0519	1535.4	0.0425
M03466_2.00:RUNX1:RUNX2:RUNX3	WAACCGCAAAAACCGCAR	0.001	-7.988	0.0029	4	0.0007	2.8	0.0001
M04187_2.00:MSC:TCF21	YAACAGCTGTTR	0.001	-7.955	0.003	200	0.0346	975.4	0.027
M04801_2.00:ELF1:ELF2:ELF4:ELK1:ELK3:ELK4:ERF:ERG:ETS1:ETS2:ETV1:ETV2:ETV3:ETV3L:ETV4:ETV5:FEV:FLI1:GABPA	RCAGGAAGGAAGTG	0.001	-7.947	0.003	97	0.0168	420	0.0116
M03478_2.00:NFIA:NFIB:NFIC:NFIX	TTGGCAHNDTGCCAR	0.001	-7.913	0.0031	30	0.0052	93	0.0026
M04182_2.00:NEUROG2:NEUROG3	GACATATGTC	0.001	-7.878	0.0033	561	0.097	3047.9	0.0844
M04147_2.00:USF1:USF2	ACCATGTGACV	0.001	-7.863	0.0033	252	0.0436	1267.2	0.0351
M05689_2.00:PAX1:PAX2:PAX3:PAX5:PAX6:PAX7:PAX8:PAX9	GCANTCAWGCGTGACGR	0.001	-7.832	0.0034	15	0.0026	33.6	0.0009
M02733_2.00:EHF:ELF1:ELF2:ELF3:ELF4:ELF5:ETV6:ETV7:FEV	ACCCGGAAGT	0.001	-7.799	0.0035	120	0.0208	543.9	0.0151
M04747_2.00:EHF:ELF1:ELF2:ELF3:ELF4:ELF5:ELK1:ELK3:ELK4:ERF:ERG:ETS1:ETS2:ETV1:ETV2:ETV3:ETV3L:ETV4:ETV5:ETV6:ETV7:FEV:FLI1:GABPA:SPDEF	AATGCGGAAGTG	0.001	-7.787	0.0036	64	0.0111	254.2	0.007
M04728_2.00:EHF:ELF1:ELF2:ELF3:ELF4:ELF5:ELK1:ELK3:ELK4:ERF:ERG:ETS1:ETS2:ETV1:ETV2:ETV3:ETV3L:ETV4:ETV5:ETV6:ETV7:FEV:FLI1:GABPA:SPDEF	AACCAGGAAGTR	0.001	-7.784	0.0036	54	0.0093	205.5	0.0057
M09881_2.00:MITF:TFE3:TFEB:TFEC	CATGTGA	0.001	-7.759	0.0036	3176	0.5494	19041.2	0.5274
M05496_2.00:POU3F4	DTATGCWAATKAG	0.001	-7.729	0.0037	106	0.0183	470.2	0.013
M01247_2.00:DUXA	HTGATTGRY	0.001	-7.694	0.0039	1597	0.2762	9277.6	0.257
M09511_2.00:ZBTB33	GGVTCTCGCGAGAAC	0.001	-7.637	0.0041	6	0.001	6.5	0.0002
M05476_2.00:POU3F2	WTATGCWAATKAG	0.001	-7.589	0.0043	106	0.0183	472.3	0.0131
M03147_2.00:MEIS1:MEIS2:MEIS3:PKNOX1:PKNOX2:TGIF1:TGIF2	WTGACAGCTGTCAA	0.001	-7.546	0.0045	5	0.0009	4.6	0.0001
M03883_2.00:PAX4	CGTCACGCATGAVTG	0.001	-7.546	0.0045	5	0.0009	4.3	0.0001
M01992_2.00:FOXI1:FOXI3:FOXJ2:FOXJ3:FOXP3	ATAAACAA	0.001	-7.534	0.0045	1478	0.2557	8561.3	0.2371
M04166_2.00:ATOH1	AACAGCTGTC	0.001	-7.476	0.0048	226	0.0391	1130	0.0313
M08901_2.00:ZNF18	CCAGTTCACACC	0.001	-7.445	0.0049	272	0.0471	1390.7	0.0385
M03082_2.00:CRX:DMBX1:DPRX:GSC:GSC2:OTX1:OTX2:PITX1:PITX2:PITX3:TPRX1	NYTAATCCC	0.001	-7.427	0.005	1454	0.2515	8422	0.2333
M10507_2.00:ELF1:ELF2:ELF4:ELK1:ELK3:ELK4:ERF:ERG:ETS1:ETS2:ETV1:ETV2:ETV3:ETV3L:ETV4:ETV5:FEV:FLI1:GABPA	RCCGGAAGTGCA	0.001	-7.426	0.005	97	0.0168	427.3	0.0118
M10110_2.00:PRDM1	SRGGAAGTGAAAGTRA	0.001	-7.422	0.005	81	0.014	344.6	0.0095
M03442_2.00:PAX1:PAX2:PAX3:PAX5:PAX6:PAX7:PAX8:PAX9	KGCASTCATGCGTGACG	0.001	-7.407	0.0051	3	0.0005	0.3	0
M03469_2.00:RUNX1:RUNX2:RUNX3	WRACCGCAAAAACCGCAR	0.001	-7.407	0.0051	3	0.0005	0	0
M07640_2.00:ZNF791	CTCTGACCCCGCCTCCYTTCTAAA	0.001	-7.407	0.0051	3	0.0005	0	0
M07643_2.00:ZNF25	TTTCTAAATGCAGCAACCTBTGTTCTTCA	0.001	-7.407	0.0051	3	0.0005	0	0
M09888_2.00:ARNT:ARNT2	CTTCCTCGTCCCCGW	0.001	-7.407	0.0051	3	0.0005	0.3	0
M04950_2.00:CRX:DMBX1:DPRX:GSC:GSC2:OTX1:OTX2:PITX1:PITX2:PITX3:TPRX1	CTAATCCC	0.001	-7.376	0.0052	1367	0.2365	7895.2	0.2187
M09350_2.00:REL:RELA	TGGMATTTCCCTWCH	0.001	-7.354	0.0053	74	0.0128	309.1	0.0086
M09353_2.00:REL:RELA	TGGMATTTCCCTWCH	0.001	-7.354	0.0053	74	0.0128	309.1	0.0086
M08761_2.00:BHLHE40:BHLHE41	GCACGTGAC	0.001	-7.354	0.0053	362	0.0626	1907.7	0.0528
M09760_2.00:TFAP2A:TFAP2B:TFAP2C:TFAP2D:TFAP2E	HNTGCCCTGRGGCC	0.001	-7.353	0.0053	276	0.0477	1415.7	0.0392
M02794_2.00:MESP1	HACACCTGBN	0.001	-7.339	0.0054	1628	0.2816	9487.5	0.2628
M09149_2.00:HOXA13:HOXB13:HOXC13:HOXD13	TTTTATDGGY	0.001	-7.323	0.0055	924	0.1598	5224.5	0.1447
M09113_2.00:FOXI1:FOXJ3:FOXK1:FOXK2	RNGTAAACAVS	0.001	-7.305	0.0056	1224	0.2117	7032.2	0.1948
M04997_2.00:CRX:DMBX1:DPRX:GSC:GSC2:OTX1:OTX2:PITX1:PITX2:PITX3:TPRX1	YTAATCCC	0.001	-7.232	0.006	1548	0.2678	9005.9	0.2495
M05008_2.00:ALX1:ALX3:ALX4:ARX:BARX1:BARX2:BSX:DLX1:DLX2:DLX3:DLX6:DRGX:EMX1:EMX2:EN1:EN2:ESX1:EVX1:EVX2:GBX1:GBX2:GSX1:GSX2:HESX1:HOXA2:HOXA3:HOXB2:HOXB3:HOXD3:ISX:LBX1:LBX2:LHX1:LHX2:LHX3:LHX4:LHX5:LHX6:LHX8:LHX9:LMX1A:LMX1B:MEOX1:MIXL1:MNX1:MSX1:MSX2:NKX1-1:NKX1-2:NOBOX:NOTO:OTP:PDX1:PHOX2A:PHOX2B:PROP1:PRRX1:PRRX2:RAX:RAX2:SEBOX:SHOX:SHOX2:UNCX:VAX1:VAX2:VSX1:VSX2:ZFHX2:ZFHX3	STAATTGS	0.001	-7.225	0.006	1387	0.2399	8025.9	0.2223
M03298_2.00:POU2F2	WTATGCAAATK	0.001	-7.225	0.006	450	0.0778	2421.2	0.0671
M03726_2.00:ELF1:ELF2:ELF4:ELK1:ELK3:ELK4:ERF:ERG:ETS1:ETS2:ETV1:ETV2:ETV3:ETV3L:ETV4:ETV5:FEV:FLI1:GABPA	GACCGGAAGTS	0.001	-7.191	0.0062	50	0.0086	191.6	0.0053
M06085_2.00:SCRT1:SCRT2	ACCACCTGTTG	0.001	-7.11	0.0067	19	0.0033	51.7	0.0014
M07949_2.00:EHF:ELF1:ELF2:ELF3:ELF4:ELF5:ELK1:ELK3:ELK4:ERF:ERG:ETS1:ETS2:ETV1:ETV2:ETV3:ETV3L:ETV4:ETV5:ETV6:ETV7:FEV:FLI1:GABPA:SPDEF	ACCCGGAAGTG	0.001	-7.071	0.007	89	0.0154	390.3	0.0108
M02254_2.00:IRF5:IRF6	NAYCGAWACT	0.001	-7.045	0.0072	433	0.0749	2328.5	0.0645
M08022_2.00:CTCF	RGYGCCCYCTRGTGG	0.001	-7.024	0.0073	62	0.0107	252.9	0.007
M05446_2.00:POU2F2	DTATGCWAATB	0.001	-6.989	0.0076	503	0.087	2739.7	0.0759
M02980_2.00:ELF1:ELF2:ELF4:ELK1:ELK3:ELK4:ERF:ERG:ETS1:ETS2:ETV1:ETV2:ETV3:ETV3L:ETV4:ETV5:FEV:FLI1:GABPA	ACCGGAAGTD	0.001	-6.928	0.0081	60	0.0104	243.7	0.0068
M04608_2.00:SNAI3	TGCACCTGYY	0.001	-6.909	0.0082	890	0.154	5040.1	0.1396
M07814_2.00:JUN:JUNB:JUND	DMTGASTCATWTYGARANT	0.01	-6.888	0.0084	19	0.0033	52.9	0.0015
M07867_2.00:CTCF	GCCMYCTRGTGGY	0.01	-6.881	0.0084	98	0.017	440.7	0.0122
M05279_2.00:HOXA10:HOXA11:HOXC10:HOXC11:HOXC12:HOXD10:HOXD11:HOXD12:MEOX2	DTTTACGACS	0.01	-6.837	0.0088	153	0.0265	738.9	0.0205
M03010_2.00:ELF1:ELF2:ELF4:ELK1:ELK3:ELK4:ERF:ERG:ETS1:ETS2:ETV1:ETV2:ETV3:ETV3L:ETV4:ETV5:FEV:FLI1:GABPA	ACCGGAAGTD	0.01	-6.833	0.0088	59	0.0102	239.5	0.0066
M05486_2.00:POU3F1	DTATGCWAATKAS	0.01	-6.83	0.0088	348	0.0602	1842.6	0.051
M06437_2.00:PAX2:PAX5:PAX6:PAX8	AGCGTGACG	0.01	-6.808	0.009	110	0.019	505.7	0.014
M07902_2.00:CTCF	RSYGCCCYCTRGTGG	0.01	-6.791	0.0091	68	0.0118	285.1	0.0079
M03206_2.00:HOXA10:HOXA11:HOXC10:HOXC11:HOXC12:HOXD10:HOXD11:HOXD12:MEOX2	GTAATAAAA	0.01	-6.772	0.0093	759	0.1313	4263.8	0.1181
M04930_2.00:CRX:DMBX1:DPRX:GSC:GSC2:OTX1:OTX2:PITX1:PITX2:PITX3:TPRX1	YTAATCCC	0.01	-6.766	0.0094	1404	0.2429	8156	0.2259
M05132_2.00:RHOXF2:RHOXF2B	YTAATCCC	0.01	-6.766	0.0094	1404	0.2429	8156	0.2259
M04170_2.00:ARNT:ARNT2	GTCACGTGMN	0.01	-6.756	0.0094	246	0.0426	1260.5	0.0349
M04138_2.00:TCF12:TCF3:TCF4	VCACCTGC	0.01	-6.755	0.0094	3146	0.5442	18922.3	0.5241
M07654_2.00:ZNF223	YGCCCCCTDGTGGC	0.01	-6.749	0.0095	83	0.0144	363.8	0.0101
M10189_2.00:EGR1:EGR2:EGR3:EGR4	TGCGTGGGCGK	0.01	-6.715	0.0098	162	0.028	791	0.0219
M05249_2.00:CDX1:CDX2:CDX4	VTTTATGGC	0.01	-6.678	0.0102	1896	0.328	11171.2	0.3094
M09503_2.00:CTCF	AYAGTGCCMYCTRGTGGCCA	0.01	-6.654	0.0104	17	0.0029	45.6	0.0013
M08025_2.00:ZNF281	CCCCTCCCCCACCYC	0.01	-6.616	0.0108	221	0.0382	1122.8	0.0311
M04949_2.00:CRX:DMBX1:DPRX:GSC:GSC2:OTX1:OTX2:PITX1:PITX2:PITX3:TPRX1	CTAATCCS	0.01	-6.608	0.0109	1513	0.2617	8829.3	0.2446
M07784_2.00:TFAP2A:TFAP2B:TFAP2C:TFAP2D:TFAP2E	RBNGCCTSAGGGCAN	0.01	-6.6	0.0109	211	0.0365	1066.2	0.0295
M10505_2.00:ELF1:ELF2:ELF4:ELK1:ELK3:ELK4:ERF:ERG:ETS1:ETS2:ETV1:ETV2:ETV3:ETV3L:ETV4:ETV5:FEV:FLI1:GABPA	AACCGGAAG	0.01	-6.588	0.0111	126	0.0218	595.8	0.0165
M07602_2.00:ZNF18	RGTGTGAACHGGNGB	0.01	-6.582	0.0111	274	0.0474	1425	0.0395
M07673_2.00:ZNF479	NBNRTCCCCMGAGTCATC	0.01	-6.563	0.0113	27	0.0047	88.5	0.0025
M03602_2.00:MYOD1	GCGACAGCTGTCGC	0.01	-6.561	0.0113	5	0.0009	5.7	0.0002
M08770_2.00:NEUROD1:NEUROD2:NEUROD4:NEUROD6	RRCAGATGGY	0.01	-6.547	0.0115	825	0.1427	4668.5	0.1293
M09832_2.00:TWIST1:TWIST2	CACCTGG	0.01	-6.54	0.0115	3121	0.5399	18781.1	0.5202
M00470_2.00:HOXA10:HOXA11:HOXA5:HOXA6:HOXA7:HOXA9:HOXB5:HOXB6:HOXB8:HOXB9:HOXC10:HOXC11:HOXC5:HOXC6:HOXC8:HOXC9:HOXD10:HOXD11:HOXD8:HOXD9	NGTAATTAAN	0.01	-6.504	0.012	909	0.1572	5174.9	0.1433
M06438_2.00:PAX1:PAX2:PAX3:PAX5:PAX6:PAX8:PAX9	ABTSRWGCGTGACGK	0.01	-6.5	0.012	20	0.0035	58.5	0.0016
M04506_2.00:ZNF75A:ZNF75D	RTGTGGGAAAAGCT	0.01	-6.495	0.012	11	0.0019	23.4	0.0006
M02922_2.00:MTF1	GTGCCGTGTGCAAA	0.01	-6.493	0.012	4	0.0007	3.7	0.0001
M08020_2.00:THAP1	CGCCATCTTKGWTRHGGGCAR	0.01	-6.493	0.012	4	0.0007	3.1	0.0001
M08024_2.00:BCL6	TYTYCCTBTCTTCCCYTCYCYTYBYCTYYY	0.01	-6.477	0.0122	61	0.0106	253.3	0.007
M09416_2.00:STAT2	STTTCAGTTTCATTTTCYY	0.01	-6.385	0.0134	32	0.0055	112.2	0.0031
M09423_2.00:STAT2	STTTCAGTTTCATTTTCYY	0.01	-6.385	0.0134	32	0.0055	112.2	0.0031
M09792_2.00:TCF12:TCF3:TCF4	GGMCASCTGCNGV	0.01	-6.329	0.0141	918	0.1588	5237.7	0.1451
M08806_2.00:JUN:JUNB:JUND	DRTGACTCATC	0.01	-6.318	0.0143	222	0.0384	1135.7	0.0315
M09595_2.00:IRF4:IRF8	ACTGAAACCA	0.01	-6.285	0.0147	895	0.1548	5101.4	0.1413
M07641_2.00:ZNF266	ANTACTCACAGGYCC	0.01	-6.273	0.0149	47	0.0081	185.5	0.0051
M08726_2.00:BHLHE40:BHLHE41	RGCACGTGAS	0.01	-6.24	0.0154	317	0.0548	1681.5	0.0466
M00345_2.00:PAX1:PAX2:PAX3:PAX5:PAX6:PAX7:PAX8:PAX9	NCGTCACGST	0.01	-6.183	0.0163	169	0.0292	840.9	0.0233
M05833_2.00:MITF:TFE3:TFEB:TFEC	CACGTGAC	0.01	-6.182	0.0163	634	0.1097	3545.3	0.0982
M10514_2.00:ELF1:ELF2:ELF4:ELK1:ELK3:ELK4:ERF:ERG:ETS1:ETS2:ETV1:ETV2:ETV3:ETV3L:ETV4:ETV5:FEV:FLI1:GABPA	CWTCCKGT	0.01	-6.173	0.0164	910	0.1574	5197.7	0.144
M03111_2.00:CRX:DMBX1:DPRX:GSC:GSC2:OTX1:OTX2:PITX1:PITX2:PITX3:TPRX1	NYTAATCCC	0.01	-6.137	0.017	1451	0.251	8480.4	0.2349
M05009_2.00:ALX1:ALX3:ALX4:ARX:BARX1:BARX2:BSX:DLX1:DLX2:DLX3:DLX6:DRGX:EMX1:EMX2:EN1:EN2:ESX1:EVX1:EVX2:GBX1:GBX2:GSX1:GSX2:HESX1:HOXA2:HOXA3:HOXB2:HOXB3:HOXD3:ISX:LBX1:LBX2:LHX1:LHX2:LHX3:LHX4:LHX5:LHX6:LHX8:LHX9:LMX1A:LMX1B:MEOX1:MIXL1:MNX1:MSX1:MSX2:NKX1-1:NKX1-2:NOBOX:NOTO:OTP:PDX1:PHOX2A:PHOX2B:PROP1:PRRX1:PRRX2:RAX:RAX2:SEBOX:SHOX:SHOX2:UNCX:VAX1:VAX2:VSX1:VSX2:ZFHX2:ZFHX3	STAATTGS	0.01	-6.134	0.017	1389	0.2403	8102.3	0.2244
M02460_2.00:GMEB1:GMEB2	NBACGTMNN	0.01	-6.125	0.0171	2231	0.3859	13275.8	0.3677
M10301_2.00:IKZF1:IKZF2:IKZF3	NHTTGGGAATRCC	0.01	-6.109	0.0174	191	0.033	965.1	0.0267
M07821_2.00:BATF:BATF3	TGAGTCATAWCGARA	0.01	-6.069	0.0181	48	0.0083	192.5	0.0053
M07915_2.00:CTCF	YRSYGCCMYCTRGTGGYMANW	0.01	-6.069	0.0181	19	0.0033	56.8	0.0016
M04504_2.00:ZNF75A:ZNF75D	MGCTTTTCCCACAC	0.01	-6.03	0.0188	31	0.0054	110.6	0.0031
M08077_2.00:NFE2:NFE2L1:NFE2L2:NFE2L3	CASVATGACTCAGCA	0.01	-6.027	0.0188	24	0.0042	78.6	0.0022
M07796_2.00:MAX	CCACGTGRYC	0.01	-6	0.0193	288	0.0498	1521.3	0.0421
M04088_2.00:MITF:TFEB	CGCACGTGACN	0.01	-5.983	0.0196	106	0.0183	497.7	0.0138
M07838_2.00:JUN:JUNB:JUND	GRTGACTCAYC	0.01	-5.947	0.0203	214	0.037	1099.5	0.0305
M08737_2.00:NEUROD1:NEUROD2:NEUROD4:NEUROD6	RRCAGATGG	0.01	-5.947	0.0203	1005	0.1738	5782.8	0.1602
M05562_2.00:MYBL2	TTAACSGTTAA	0.01	-5.936	0.0205	65	0.0112	280.6	0.0078
M08067_2.00:JUN:JUNB:JUND	DRTGACTCATS	0.01	-5.926	0.0207	192	0.0332	975.4	0.027
M07783_2.00:TFAP2A:TFAP2B:TFAP2C:TFAP2D:TFAP2E	NGCCTSAGGGCANGS	0.01	-5.909	0.021	196	0.0339	999	0.0277
M10155_2.00:CTCF	ACCAGGGGGC	0.01	-5.874	0.0218	36	0.0062	135.9	0.0038
M07820_2.00:JUN:JUNB:JUND	KGATGACTCATNCYY	0.01	-5.841	0.0225	95	0.0164	440.3	0.0122
M11210_2.00:PAX1:PAX2:PAX3:PAX5:PAX6:PAX7:PAX8:PAX9	GTCACGCTTGGCTGCYCH	0.01	-5.832	0.0226	18	0.0031	53.2	0.0015
M02229_2.00:IRX1:IRX3:IRX6	NKTACATGTTY	0.01	-5.821	0.0229	638	0.1104	3585.2	0.0993
M00229_2.00:EGR2	NMMCACGCA	0.01	-5.807	0.0232	2439	0.4219	14587.3	0.4041
M09640_2.00:SOX1:SOX10:SOX11:SOX12:SOX13:SOX14:SOX15:SOX17:SOX18:SOX2:SOX21:SOX3:SOX30:SOX4:SOX5:SOX6:SOX7:SOX8:SOX9:SRY	CCATTGTTNY	0.01	-5.806	0.0232	2276	0.3937	13577.4	0.3761
M09079_2.00:EHF:ELF1:ELF2:ELF3:ELF4:ELF5:ELK1:ELK3:ELK4:ERF:ERG:ETS1:ETS2:ETV1:ETV2:ETV3:ETV3L:ETV4:ETV5:ETV6:ETV7:FEV:FLI1:GABPA:SPDEF	GAACCCGGAAGTGG	0.01	-5.781	0.0237	48	0.0083	196	0.0054
M03336_2.00:IRF4:IRF8	HCGAAACCGAAACT	0.01	-5.78	0.0237	5	0.0009	6.3	0.0002
M03306_2.00:POU2F3	TATGCAAAT	0.01	-5.748	0.0245	567	0.0981	3166.8	0.0877
M06282_2.00:CRX:DMBX1:DPRX:GSC:GSC2:OTX1:OTX2:PITX1:PITX2:PITX3:TPRX1	TTAATCC	0.01	-5.712	0.0253	1446	0.2501	8477.3	0.2348
M04729_2.00:EHF:ELF1:ELF2:ELF3:ELF4:ELF5:ELK1:ELK3:ELK4:ERF:ERG:ETS1:ETS2:ETV1:ETV2:ETV3:ETV3L:ETV4:ETV5:ETV6:ETV7:FEV:FLI1:GABPA:SPDEF	AATSCGGAAGTR	0.01	-5.708	0.0254	60	0.0104	257.2	0.0071
M02982_2.00:ELF1:ELF2:ELF4:ELK1:ELK3:ELK4:ERF:ERG:ETS1:ETS2:ETV1:ETV2:ETV3:ETV3L:ETV4:ETV5:FEV:FLI1:GABPA	ACCGGAAGTR	0.01	-5.702	0.0256	51	0.0088	211.4	0.0059
M01751_2.00:ARNTL	DCACGTGACN	0.01	-5.689	0.0259	314	0.0543	1681.8	0.0466
M05136_2.00:CRX:DMBX1:DPRX:GSC:GSC2:OTX1:OTX2:PITX1:PITX2:PITX3:TPRX1	CTAATCCS	0.01	-5.653	0.0268	1391	0.2406	8145.6	0.2256
M10494_2.00:ELF1:ELF2:ELF4:ELK1:ELK3:ELK4:ERF:ERG:ETS1:ETS2:ETV1:ETV2:ETV3:ETV3L:ETV4:ETV5:FEV:FLI1:GABPA	VNACMGGAWRTTN	0.01	-5.649	0.0268	939	0.1624	5401	0.1496
M11148_2.00:HNF4A:HNF4G:NR2C1:NR2C2:NR2F1:NR2F2:NR2F6:NR6A1:PPARA:PPARD:RARA:RARB:RARG:RORA:RORB:RORC:RXRA:RXRB:RXRG	CTCAAGTTCAAGKTCAMY	0.01	-5.612	0.0279	7	0.0012	12.6	0.0003
M00259_2.00:FOXC1:FOXC2:FOXD1:FOXD2:FOXD3:FOXD4:FOXD4L1:FOXD4L3:FOXD4L4:FOXD4L5:FOXD4L6:FOXE1:FOXF1:FOXF2:FOXG1:FOXI1:FOXI3:FOXK2:FOXL1:FOXL2:FOXP4:FOXS1	ATAAACAA	0.01	-5.595	0.0283	1749	0.3025	10342.3	0.2865
M09233_2.00:IRF1:IRF2	RAAANWGAAASTGAAAGTAA	0.01	-5.594	0.0283	41	0.0071	162.2	0.0045
M09237_2.00:IRF1:IRF2	RAAARWGAAAGTGAAAGTRR	0.01	-5.593	0.0283	17	0.0029	50.4	0.0014
M09245_2.00:IRF1:IRF2	RAAARWGAAAGTGAAAGTRR	0.01	-5.593	0.0283	17	0.0029	50.4	0.0014
M08136_2.00:NKX2-1:NKX2-2:NKX2-3:NKX2-4:NKX2-5:NKX2-6:NKX2-8	CTTGAGTGSYT	0.01	-5.593	0.0283	402	0.0695	2198.2	0.0609
M05133_2.00:RHOXF2:RHOXF2B	CTAATCCC	0.01	-5.58	0.0286	1465	0.2534	8602.7	0.2383
M05949_2.00:MYOD1	CACCTGTC	0.01	-5.568	0.0289	1327	0.2295	7760.9	0.215
M05773_2.00:LEF1:TCF7:TCF7L1:TCF7L2	ASATCAAAG	0.01	-5.563	0.029	381	0.0659	2076.9	0.0575
M10429_2.00:CXXC1	KTRHAACGMWAAAMA	0.01	-5.525	0.0301	51	0.0088	213.9	0.0059
M09756_2.00:TFAP2A:TFAP2B:TFAP2C:TFAP2D:TFAP2E	AHCGCCTBAGGSGAT	0.01	-5.489	0.0312	93	0.0161	435.6	0.0121
M04189_2.00:MSC:TCF21	YAACAGCTGTTR	0.01	-5.485	0.0313	73	0.0126	329	0.0091
M07682_2.00:ZNF555	CACACYCTCASCAKMWGAGMYGGCGCCCGC	0.01	-5.467	0.0318	4	0.0007	4.6	0.0001
M11240_2.00:RELA	AAATCCCCT	0.01	-5.462	0.0319	272	0.0471	1445.8	0.04
M02256_2.00:IRF5	AHCGAAACTR	0.01	-5.449	0.0323	129	0.0223	634	0.0176
M08038_2.00:RELA	YYCTTCCTCCCYCCBCYTCYCCWBYCCTSY	0.01	-5.438	0.0327	35	0.0061	134.2	0.0037
M01683_2.00:HMGA1:HMGA2	NRNWWWWNYN	0.01	-5.419	0.0332	1563	0.2704	9213.9	0.2552
M09484_2.00:BACH1:BACH2	TGACTCAGCA	0.01	-5.402	0.0338	189	0.0327	971.4	0.0269
M08787_2.00:BACH1:BACH2	RTGACTCAGCA	0.01	-5.401	0.0338	138	0.0239	684.3	0.019
M05586_2.00:HNF4A:HNF4G:NR2E1	ADAAGTCAM	0.01	-5.343	0.0358	1902	0.329	11302.2	0.3131
M04125_2.00:ARNTL	NKCACRTGAC	0.01	-5.289	0.0377	928	0.1605	5354.5	0.1483
M03171_2.00:PKNOX1:PKNOX2:TGIF1:TGIF2:TGIF2LX:TGIF2LY	TGACAGCTGTCA	0.01	-5.284	0.0379	14	0.0024	39.3	0.0011
M08185_2.00:BACH1:BACH2	TGACTCAGCA	0.01	-5.282	0.0379	58	0.01	252.8	0.007
M03733_2.00:ELF1:ELF2:ELF4:ELK1:ELK3:ELK4:ERF:ERG:ETS1:ETS2:ETV1:ETV2:ETV3:ETV3L:ETV4:ETV5:FEV:FLI1:GABPA	ACCGKAAGTG	0.01	-5.276	0.0381	109	0.0189	526.4	0.0146
M11260_2.00:RUNX1:RUNX2:RUNX3	NNNHAACCACAGRSN	0.01	-5.275	0.0381	909	0.1572	5240.6	0.1452
M09342_2.00:PAX1:PAX2:PAX3:PAX5:PAX6:PAX7:PAX8:PAX9	RDGVGCAGCCAAGCGTGAC	0.01	-5.218	0.0403	17	0.0029	52.2	0.0014
M06289_2.00:BARHL1:BARHL2:EMX1:EMX2:HMX1:HMX2:HMX3:HOXA4:HOXB4:HOXC4:HOXD4:LBX2:NKX1-1:NKX1-2:TLX1:TLX2:TLX3:VAX1:VAX2:VENTX	GTTAATTR	0.01	-5.205	0.0408	2063	0.3569	12307	0.3409
M09807_2.00:HIF1A	GCACGTNB	0.01	-5.199	0.041	2149	0.3717	12838.7	0.3556
M10934_2.00:BORCS8-MEF2B:MEF2A:MEF2B:MEF2C:MEF2D	STCTAAAAATAACCCT	0.01	-5.187	0.0414	7	0.0012	13.2	0.0004
M11205_2.00:PAX1:PAX2:PAX3:PAX5:PAX6:PAX7:PAX8:PAX9	CANTNHYGCGTGART	0.01	-5.176	0.0419	224	0.0387	1177	0.0326
M08321_2.00:ZNF281	BBCCCCTCCCCC	0.01	-5.173	0.0419	385	0.0666	2114.3	0.0586
M02878_2.00:CTCF	WGCGCCMCCTAGTGGTM	0.01	-5.162	0.0424	9	0.0016	20.5	0.0006
M01210_2.00:CXXC4:CXXC5:TET3	NNDACGTN	0.01	-5.154	0.0427	2610	0.4515	15701.7	0.4349
M04237_2.00:DBP	BGTTACGTAACV	0.01	-5.147	0.0429	27	0.0047	98.6	0.0027
M09386_2.00:LEF1:TCF7:TCF7L1:TCF7L2	TBCCTTTGATGTGGTT	0.01	-5.143	0.0431	54	0.0093	233.7	0.0065
M07797_2.00:MAX	CCACGTGNYYC	0.01	-5.137	0.0433	323	0.0559	1752.1	0.0485
M02773_2.00:MITF:TFE3	AYCACGTGAC	0.01	-5.137	0.0433	372	0.0643	2039.9	0.0565
M02081_2.00:HOXA13:HOXB13:HOXC13:HOXD13	TTTTATTA	0.01	-5.11	0.0444	2121	0.3669	12672	0.351
M08799_2.00:BATF:BATF3	MTGAGTCATAHYGAAAST	0.01	-5.105	0.0446	22	0.0038	75.2	0.0021
M10105_2.00:IKZF1:IKZF2:IKZF3:IKZF4	HWTAGGGATAW	0.01	-5.103	0.0446	1185	0.205	6926	0.1918
M09840_2.00:MYF5:MYOD1:MYOG	DVCACCTGYC	0.01	-5.096	0.0449	1771	0.3063	10514.4	0.2912
M08829_2.00:BATF:BATF3	CTGAGTCATWTYGARASH	0.01	-5.092	0.045	25	0.0043	89.9	0.0025
M05745_2.00:NFIA:NFIB:NFIC:NFIX	STTGGCDNNGTGCCARB	0.01	-5.092	0.045	20	0.0035	66.3	0.0018
M07935_2.00:ZNF274	GAGAAYTCATACTGG	0.01	-5.073	0.0458	14	0.0024	40.1	0.0011
M05539_2.00:IRF4:IRF8	HCGAAACCGAAACYR	0.01	-5.039	0.0473	11	0.0019	28.8	0.0008
M08065_2.00:BACH1:BACH2	SATGACTCAGCANW	0.01	-5.034	0.0475	61	0.0106	271.4	0.0075
M11409_2.00:TEAD3:TEAD4	GVTATTTTT	0.01	-5.029	0.0477	1208	0.209	7070	0.1958
M02815_2.00:MLX	ATCACGTGAT	0.01	-5.015	0.0483	67	0.0116	303.2	0.0084
M05777_2.00:LEF1:TCF7:TCF7L1:TCF7L2	ASATCAAAG	0.01	-5.013	0.0484	396	0.0685	2185.9	0.0605
M04103_2.00:MYF5:MYF6:MYOD1:MYOG	NAACAGCTGTYV	0.01	-5.01	0.0485	142	0.0246	716	0.0198
M07688_2.00:ZNF793	GAGCCCCAAGCM	0.01	-5.005	0.0487	90	0.0156	427.9	0.0119
M00778_2.00:EGR1:EGR2:EGR3:EGR4	CGCCCACGCA	0.01	-4.973	0.0502	350	0.0605	1916.4	0.0531
M04124_2.00:ARNTL	GTCACGTGMN	0.01	-4.966	0.0505	352	0.0609	1928.8	0.0534
M10029_2.00:CEBPA:CEBPB:CEBPE	WNATTGCDTAADDN	0.01	-4.962	0.0507	406	0.0702	2246.6	0.0622
M08071_2.00:FOS:FOSB:FOSL1:FOSL2	RGTGACTCATV	0.01	-4.936	0.052	224	0.0387	1184.2	0.0328
M00797_2.00:FOXO1:FOXO3:FOXO4:FOXO6:FOXP4	GTAAACAA	0.01	-4.929	0.0523	1753	0.3032	10416.7	0.2885
M08064_2.00:FOSL2	KGRTGACTCAB	0.01	-4.909	0.0533	215	0.0372	1133.6	0.0314
M03323_2.00:POU2F2	TATGCAAAT	0.01	-4.891	0.0542	187	0.0323	973.3	0.027
M04998_2.00:CRX:DMBX1:DPRX:GSC:GSC2:OTX1:OTX2:PITX1:PITX2:PITX3:TPRX1	CTAATCCC	0.01	-4.876	0.055	1575	0.2724	9326.5	0.2583
M10808_2.00:PAX2	HBTNGTCAYGCRTGAYBGN	0.01	-4.871	0.0552	14	0.0024	41.2	0.0011
M05175_2.00:ALX1:ALX3:ALX4:ARX:DRGX:EMX1:EMX2:EN1:EN2:ESX1:GBX1:GBX2:HESX1:ISX:LHX1:LHX2:LHX3:LHX4:LHX5:LHX6:LHX8:LHX9:LMX1A:LMX1B:MIXL1:MSX1:MSX2:NOBOX:NOTO:OTP:PHOX2A:PHOX2B:PROP1:PRRX1:PRRX2:RAX:RAX2:SEBOX:SHOX:SHOX2:UNCX:VAX1:VAX2:VSX1:VSX2:ZFHX2	HTAACGAG	0.01	-4.868	0.0553	404	0.0699	2238.2	0.062
M01752_2.00:USF2	MMCACGTGAY	0.01	-4.862	0.0556	273	0.0472	1470.4	0.0407
M04078_2.00:MITF:TFEC	MVCACGTGACV	0.01	-4.855	0.0559	97	0.0168	468.7	0.013
M05741_2.00:NFIA:NFIB:NFIC:NFIX	STTGGCRBBGTGCCARB	0.01	-4.841	0.0567	30	0.0052	115.3	0.0032
M02788_2.00:BHLHE40:BHLHE41	VKCACGTGMC	0.01	-4.833	0.057	220	0.0381	1164.8	0.0323
M10345_2.00:KLF13:KLF9	AGGGCGGGTG	0.01	-4.812	0.0582	158	0.0273	810.7	0.0225
M07666_2.00:ZNF662	ATCTAGCCCCBKCCTACC	0.01	-4.809	0.0583	10	0.0017	25.4	0.0007
M05628_2.00:HNF4A:HNF4G:NR2C1:NR2C2:NR2F1:NR2F2:NR2F6:NR6A1:PPARA:PPARD:RARA:RARB:RARG:RORA:RORB:RORC:RXRA:RXRB:RXRG	GTCAAGKTCAAGGTCRN	0.01	-4.804	0.0586	12	0.0021	33.9	0.0009
M05022_2.00:CRX:DMBX1:DPRX:GSC:GSC2:OTX1:OTX2:PITX1:PITX2:PITX3:TPRX1	NTAATCCS	0.01	-4.77	0.0606	1400	0.2422	8261.7	0.2288
M09059_2.00:ELF1:ELF2:ELF4:ELK1:ELK3:ELK4:ERF:ERG:ETS1:ETS2:ETV1:ETV2:ETV3:ETV3L:ETV4:ETV5:FEV:FLI1:GABPA	GRCCGGAAGTGG	0.01	-4.757	0.0613	87	0.015	415.1	0.0115
M05384_2.00:CRX:DMBX1:DPRX:GSC:GSC2:OTX1:OTX2:PITX1:PITX2:PITX3:TPRX1	CTAATCCS	0.01	-4.747	0.0618	1403	0.2427	8281.3	0.2294
M05817_2.00:TBX15:TBX18:TBX20:TBX4:TBX5	DAGGTGTKARGGTGTGAW	0.01	-4.73	0.0628	21	0.0036	73.4	0.002
M04048_2.00:TFAP2A:TFAP2B:TFAP2C:TFAP2D:TFAP2E	HSCCYNMGGSN	0.01	-4.707	0.0642	2556	0.4421	15403.8	0.4267
M08198_2.00:EHF:ELF1:ELF2:ELF3:ELF4:ELF5:ELK1:ELK3:ELK4:ERF:ERG:ETS1:ETS2:ETV1:ETV2:ETV3:ETV3L:ETV4:ETV5:ETV6:ETV7:FEV:FLI1:GABPA:SPDEF	ACCCGGAAGY	0.01	-4.705	0.0643	46	0.008	197.3	0.0055
M05538_2.00:IRF5	VCGAAACCGAAACT	0.01	-4.703	0.0644	19	0.0033	64.8	0.0018
M09466_2.00:TCF12:TCF3:TCF4	RCAGCTGYNH	0.01	-4.682	0.0657	1699	0.2939	10103.2	0.2798
M09835_2.00:MAX	RRAHCACGTGDTYY	0.01	-4.659	0.0672	66	0.0114	303.2	0.0084
M03560_2.00:EOMES:TBR1:TBX21	AGGTGTGAAA	0.01	-4.644	0.0681	258	0.0446	1390.1	0.0385
M07845_2.00:PRDM1	TCACTTTCACTTTYH	0.01	-4.638	0.0685	59	0.0102	266.9	0.0074
M07632_2.00:ZNF274	CAGTATGAGTTCTCT	0.01	-4.627	0.0692	13	0.0022	38.4	0.0011
M02775_2.00:TCF12:TCF3:TCF4	HRCACCTGBN	0.01	-4.626	0.0692	1760	0.3044	10483.1	0.2904
M03808_2.00:CRX:DMBX1:DPRX:GSC:GSC2:OTX1:OTX2:PITX1:PITX2:PITX3:TPRX1	HTAATCCS	0.01	-4.606	0.0705	1384	0.2394	8175.8	0.2265
M05499_2.00:POU3F4	WTATGCGCATAW	0.1	-4.6	0.0708	5	0.0009	8.7	0.0002
M05534_2.00:IRF3	AGGAAAGGGAAASBGAAACD	0.1	-4.6	0.0708	5	0.0009	8.8	0.0002
M04012_2.00:XBP1	TGCCACGTGTACW	0.1	-4.591	0.0713	21	0.0036	74.7	0.0021
M01746_2.00:MSC:TCF21	AACATATGK	0.1	-4.59	0.0714	569	0.0984	3232.5	0.0895
M04505_2.00:ZNF75A:ZNF75D	MGCTTTTCCCACAC	0.1	-4.587	0.0715	12	0.0021	34.7	0.001
M04169_2.00:ATOH1	AMCATATGKC	0.1	-4.573	0.0724	202	0.0349	1068.7	0.0296
M07787_2.00:USF2	GGTCACGTGRC	0.1	-4.538	0.075	131	0.0227	664.6	0.0184
M05415_2.00:PAX2:PAX4:PAX6	TCACGCHTCACYGCACN	0.1	-4.53	0.0755	38	0.0066	158.3	0.0044
M04439_2.00:EGR1:EGR2:EGR3:EGR4	MMCGCCCACGCAC	0.1	-4.524	0.0759	159	0.0275	823.5	0.0228
M09486_2.00:NFE2:NFE2L1:NFE2L2:NFE2L3	GATGACTCAGCA	0.1	-4.523	0.0759	37	0.0064	153.7	0.0043
M05990_2.00:PTF1A	AACACCTGWCA	0.1	-4.509	0.0769	651	0.1126	3728.2	0.1033
M03722_2.00:ELF1:ELF2:ELF4:ELK1:ELK3:ELK4:ERF:ERG:ETS1:ETS2:ETV1:ETV2:ETV3:ETV3L:ETV4:ETV5:ETV6:ETV7:FEV:FLI1:GABPA	AAACCGGAAGTA	0.1	-4.49	0.0783	14	0.0024	44	0.0012
M02981_2.00:ELF1:ELF2:ELF4:ELK1:ELK3:ELK4:ERF:ERG:ETS1:ETS2:ETV1:ETV2:ETV3:ETV3L:ETV4:ETV5:FEV:FLI1:GABPA	CRCTTCCGSCGGAAGTR	0.1	-4.463	0.0798	2	0.0003	0.9	0
M03331_2.00:IRF3	VSGAAAMGGAAACCGAAACTR	0.1	-4.463	0.0798	2	0.0003	1.7	0
M03339_2.00:IRF9	AACGAAACCGAAACT	0.1	-4.463	0.0798	2	0.0003	1.6	0
M03487_2.00:SOX1:SOX10:SOX11:SOX12:SOX13:SOX14:SOX15:SOX17:SOX18:SOX2:SOX21:SOX3:SOX30:SOX4:SOX5:SOX6:SOX7:SOX8:SOX9:SRY	TGAATGTGCAGTCA	0.1	-4.463	0.0798	2	0.0003	0.8	0
M03564_2.00:EOMES:TBR1:TBX21:TBX5	TCACACCTWNNRAGGTGTGA	0.1	-4.463	0.0798	2	0.0003	0.4	0
M03746_2.00:FOXN2:FOXN3	GCGTCNRTGTAAACAAW	0.1	-4.463	0.0798	2	0.0003	0	0
M03949_2.00:PAX1:PAX2:PAX3:PAX5:PAX6:PAX8:PAX9	NGCASTCATGCGTGACG	0.1	-4.463	0.0798	2	0.0003	1.2	0
M05533_2.00:IRF3	AGGAAACGGAAACCGAAACW	0.1	-4.463	0.0798	2	0.0003	1.1	0
M10806_2.00:PAX2:PAX4:PAX6	WATBTTCACGCWTGAVTKMAY	0.1	-4.463	0.0798	2	0.0003	1.8	0
M03139_2.00:HOXA10:HOXA11:HOXA9:HOXB9:HOXC10:HOXC11:HOXC12:HOXC9:HOXD10:HOXD11:HOXD12:HOXD9	GTCGTAAAAW	0.1	-4.453	0.0805	233	0.0403	1251.2	0.0347
M08789_2.00:NFE2:NFE2L1:NFE2L2:NFE2L3	ATGACTCAGCARWT	0.1	-4.447	0.0809	26	0.0045	99	0.0027
M09460_2.00:USF1:USF2	YCACGTGACS	0.1	-4.438	0.0816	252	0.0436	1362.7	0.0377
M02395_2.00:AR:NR3C1:NR3C2:PGR	HGRGWACAT	0.1	-4.418	0.0831	3541	0.6125	21586.9	0.5979
M07815_2.00:JUN:JUNB:JUND	ATGACTCAYCC	0.1	-4.416	0.0833	169	0.0292	883.9	0.0245
M02772_2.00:MLXIPL	ATCACGTGAT	0.1	-4.411	0.0836	120	0.0208	605.6	0.0168
M10020_2.00:CEBPD	TTKNGCAATV	0.1	-4.396	0.0848	1927	0.3333	11532.5	0.3194
M02817_2.00:BHLHE40:BHLHE41	VKCACGTGAC	0.1	-4.372	0.0868	149	0.0258	770.9	0.0214
M09981_2.00:ATF3:JDP2	CBCTGACGTCABCS	0.1	-4.348	0.0888	25	0.0043	95.6	0.0026
M02426_2.00:PAX2:PAX5:PAX6:PAX8	ACCGTGAYCAC	0.1	-4.347	0.0888	3	0.0005	3.4	0.0001
M05128_2.00:ALX1:ALX3:ALX4:ARX:BARHL1:BARHL2:BARX1:BARX2:BSX:DLX1:DLX2:DLX3:DLX4:DLX5:DLX6:DRGX:EMX1:EMX2:EN1:EN2:ESX1:EVX1:EVX2:GBX1:GBX2:GSX1:GSX2:HESX1:HMX1:HMX2:HMX3:HOXA1:HOXA2:HOXA3:HOXA4:HOXA5:HOXA6:HOXB1:HOXB2:HOXB3:HOXB4:HOXB5:HOXB6:HOXB8:HOXC4:HOXC5:HOXC6:HOXD1:HOXD3:HOXD4:HOXD8:ISX:LHX1:LHX3:LHX4:LHX5:MEOX1:MEOX2:MIXL1:MNX1:MSX1:MSX2:NANOG:NANOGP8:NKX1-1:NKX1-2:NOTO:OTP:PDX1:PHOX2A:PHO…	STAATTRS	0.1	-4.342	0.0892	1321	0.2285	7809.7	0.2163
M00792_2.00:FOXP1:FOXP2:FOXP3:FOXP4	GTAAACAA	0.1	-4.327	0.0905	1663	0.2877	9910.8	0.2745
M08181_2.00:MXI1	SGTTGCCATGGCGAC	0.1	-4.319	0.0911	18	0.0031	62.2	0.0017
M03315_2.00:POU3F1	WTATGCWAATTA	0.1	-4.272	0.0954	299	0.0517	1643.9	0.0455
M04550_2.00:ZNF274	HRYGAGAACTCATACN	0.1	-4.268	0.0957	23	0.004	86.5	0.0024
M03569_2.00:TBX15:TBX18:TBX20:TBX4:TBX5	AGGTGTGAHGGTGTGA	0.1	-4.244	0.0979	13	0.0022	40.1	0.0011
M09500_2.00:PRDM1	ACTTTCACTTTC	0.1	-4.238	0.0984	198	0.0343	1055.4	0.0292
M05469_2.00:POU2F3	DTATGCGCATAH	0.1	-4.238	0.0984	228	0.0394	1229.7	0.0341
M02807_2.00:TCF12:TCF3:TCF4	CRCACCTGBN	0.1	-4.211	0.1009	1672	0.2892	9975.4	0.2763
M00174_2.00:IRF3	RAANGGAAAC	0.1	-4.197	0.1023	1449	0.2506	8605.6	0.2384
M02874_2.00:PRDM1	NCACTTTCACTTTCW	0.1	-4.195	0.1023	21	0.0036	77.6	0.0022
M04083_2.00:MLX	KRTCACRTGKR	0.1	-4.195	0.1023	1048	0.1813	6152.4	0.1704
M08228_2.00:PAX1:PAX2:PAX3:PAX5:PAX6:PAX7:PAX8:PAX9	AGCGTGACCG	0.1	-4.192	0.1025	86	0.0149	420.7	0.0117
M09867_2.00:USF1:USF2	RGRYCACGTGRYCY	0.1	-4.188	0.1029	78	0.0135	376.3	0.0104
M08832_2.00:BACH1:BACH2	RTGACTCAGCA	0.1	-4.172	0.1044	143	0.0247	741.8	0.0205
M03308_2.00:POU2F1	AWTATGCAAATT	0.1	-4.145	0.1072	223	0.0386	1203.1	0.0333
M07882_2.00:CTCF	YGCCMYCTGGTG	0.1	-4.143	0.1073	149	0.0258	776.7	0.0215
M05894_2.00:SOX1:SOX10:SOX11:SOX12:SOX13:SOX14:SOX15:SOX17:SOX18:SOX2:SOX21:SOX3:SOX30:SOX4:SOX5:SOX6:SOX7:SOX8:SOX9:SRY	WAACAATRGN	0.1	-4.135	0.108	1361	0.2354	8070.3	0.2235
M05458_2.00:POU1F1	WTATGCAAATKAGN	0.1	-4.133	0.1082	19	0.0033	68.6	0.0019
M08843_2.00:NFE2:NFE2L1:NFE2L2:NFE2L3	ATGACTCAGCARWW	0.1	-4.122	0.1093	25	0.0043	97.5	0.0027
M09944_2.00:NFE2:NFE2L1:NFE2L2:NFE2L3	CRTGACTCAGCAR	0.1	-4.121	0.1093	89	0.0154	438.7	0.0122
M08793_2.00:NFE2:NFE2L1:NFE2L2:NFE2L3	VVATGACTCAGCA	0.1	-4.117	0.1097	62	0.0107	290.2	0.008
M03081_2.00:ALX1:ALX3:ALX4:ARX:BARHL1:BARHL2:BARX1:BARX2:BSX:DLX1:DLX2:DLX3:DLX4:DLX5:DLX6:DRGX:EMX2:EN1:EN2:GBX1:GBX2:GSX1:GSX2:HOXA1:HOXA2:HOXA3:HOXB1:HOXB2:HOXB3:HOXD1:HOXD3:ISX:LHX1:LHX5:MEOX1:MEOX2:MNX1:MSX1:MSX2:NANOG:NANOGP8:NKX1-1:NKX1-2:PDX1:PHOX2A:PHOX2B:PROP1:PRRX1:PRRX2:SHOX:SHOX2:UNCX:VAX1:VAX2:VSX1:VSX2	NTAATTRB	0.1	-4.117	0.1097	1495	0.2586	8894.5	0.2464
M02818_2.00:BHLHE40:BHLHE41	VKCACGTGMC	0.1	-4.112	0.11	218	0.0377	1175.4	0.0326
M08878_2.00:ZBTB17	CYTCCCCTCCCCCWCCCYC	0.1	-4.108	0.1104	126	0.0218	646.8	0.0179
M05428_2.00:PAX2	MCGTCACGCWYSASYGCNCN	0.1	-4.094	0.1115	4	0.0007	6.9	0.0002
M05537_2.00:IRF5	CCGAAACCGAAACY	0.1	-4.094	0.1115	4	0.0007	6.8	0.0002
M05687_2.00:PAX1:PAX2:PAX3:PAX5:PAX6:PAX7:PAX8:PAX9	KCAGTCAWGCGTGACGG	0.1	-4.094	0.1115	4	0.0007	6.5	0.0002
M08817_2.00:MAF:MAFA:MAFB:MAFG:MAFK	ARTGCTGACTCAGCARWTWH	0.1	-4.094	0.1115	4	0.0007	6.2	0.0002
M04714_2.00:EHF:ELF1:ELF2:ELF3:ELF4:ELF5:ETV6:ETV7:SPIC	SMGGAAGTACTTCCKS	0.1	-4.082	0.1127	8	0.0014	20.4	0.0006
M05535_2.00:IRF5	CCGAAACCGAAACY	0.1	-4.074	0.1136	9	0.0016	24.9	0.0007
M05152_2.00:NKX2-1:NKX2-2:NKX2-3:NKX2-4:NKX2-5:NKX2-6:NKX2-8	BTCAACGAS	0.1	-4.068	0.1141	289	0.05	1592.8	0.0441
M07791_2.00:MAX	SASCACGTGACYB	0.1	-4.066	0.1143	221	0.0382	1194.4	0.0331
M03236_2.00:CRX:DMBX1:DPRX:GSC:GSC2:OTX1:OTX2:PITX1:PITX2:PITX3:TPRX1	NYTAATCCBH	0.1	-4.056	0.1154	1432	0.2477	8512.4	0.2358
M03046_2.00:FOXC2:FOXD1:FOXD2:FOXD3:FOXG1:FOXI1:FOXI2:FOXI3:FOXJ2:FOXJ3:FOXK1:FOXK2:FOXP1:FOXP3	RTAAACAA	0.1	-4.051	0.1158	2310	0.3996	13934.5	0.386
M09488_2.00:BACH1:BACH2	ATGACTCAGCANWWT	0.1	-4.037	0.1173	18	0.0031	64.6	0.0018
M10112_2.00:ZBTB11	TGGGCGCMCCCC	0.1	-4.033	0.1177	23	0.004	88.2	0.0024
M04397_2.00:PRDM1	YCACTTTCACTY	0.1	-4.027	0.1183	217	0.0375	1172	0.0325
M00158_2.00:EHF:ELF1:ELF2:ELF3:ELF4:ELF5:ETV6:ETV7:FEV	ANSCGGAAGT	0.1	-4.023	0.1187	1524	0.2636	9080.8	0.2515
M03146_2.00:CRX:DMBX1:DPRX:GSC:GSC2:OTX1:OTX2:PITX1:PITX2:PITX3:TPRX1	VCTAATCCSY	0.1	-3.999	0.1214	689	0.1192	3986.8	0.1104
M01241_2.00:CRX:DMBX1:DPRX:GSC:GSC2:OTX1:OTX2:PITX1:PITX2:PITX3:TPRX1	WTAATCCN	0.1	-3.959	0.1263	1390	0.2404	8262.9	0.2289
M11188_2.00:NR2E3	RAGGTCAAAGGTCA	0.1	-3.949	0.1275	21	0.0036	79.4	0.0022
M02756_2.00:TFAP2A:TFAP2B:TFAP2C:TFAP2D:TFAP2E	TGCCCBRGGGCA	0.1	-3.948	0.1275	215	0.0372	1163.7	0.0322
M03223_2.00:MEIS1:MEIS2:MEIS3:PKNOX1:PKNOX2:TGIF1:TGIF2:TGIF2LX:TGIF2LY	TGACAGCTGTCA	0.1	-3.928	0.1299	6	0.001	13.9	0.0004
M04123_2.00:MYF5:MYOD1:MYOG	BAACAGCTGTCR	0.1	-3.926	0.13	294	0.0509	1628	0.0451
M07826_2.00:FOS:FOSB:FOSL1:FOSL2	GATGASTCACWSN	0.1	-3.921	0.1307	161	0.0278	851.6	0.0236
M10096_2.00:ZEB1:ZEB2	CADSCAGGTGTCMCC	0.1	-3.866	0.1379	57	0.0099	267.3	0.0074
M09510_2.00:ZNF143:ZNF76	ATTTCCCAGVAKSCY	0.1	-3.859	0.1388	156	0.027	824.2	0.0228
M05750_2.00:SOX1:SOX10:SOX11:SOX12:SOX13:SOX14:SOX15:SOX17:SOX18:SOX2:SOX21:SOX3:SOX30:SOX4:SOX5:SOX6:SOX7:SOX8:SOX9:SRY	BYATTGTTCT	0.1	-3.851	0.1397	1333	0.2306	7921.5	0.2194
M03791_2.00:ALX1:ALX3:ALX4:ARX:BARHL1:BARHL2:BARX1:BARX2:BSX:DRGX:EMX1:EMX2:EN1:EN2:ESX1:EVX1:EVX2:GBX1:GBX2:GSX1:GSX2:HESX1:HMX1:HMX2:HMX3:HOXA1:HOXA2:HOXA3:HOXA4:HOXA5:HOXB1:HOXB2:HOXB3:HOXB4:HOXB5:HOXC4:HOXC5:HOXD3:HOXD4:LHX2:LHX3:LHX4:LHX9:MEOX1:MEOX2:MIXL1:MNX1:MSX1:MSX2:NKX1-1:NKX1-2:NOTO:OTP:PDX1:PHOX2A:PHOX2B:PROP1:PRRX1:PRRX2:RAX:RAX2:SEBOX:SHOX:SHOX2:TLX1:TLX2:TLX3:UNCX:VAX1:VAX2:VENTX:…	CTAATTAS	0.1	-3.828	0.1428	1399	0.242	8328.7	0.2307
M08310_2.00:ZNF341	GCTSTTCCCBCCCCCCCCCCC	0.1	-3.825	0.1432	30	0.0052	125.7	0.0035
M11211_2.00:PAX1:PAX2:PAX3:PAX5:PAX6:PAX7:PAX8:PAX9	GTCACGCTT	0.1	-3.817	0.1442	245	0.0424	1343.2	0.0372
M10490_2.00:ELF1:ELF2:ELF4:ELK1:ELK3:ELK4:ERF:ERG:ETS1:ETS2:ETV1:ETV2:ETV3:ETV3L:ETV4:ETV5:FEV:FLI1:GABPA	AACCGGAAGTR	0.1	-3.816	0.1442	12	0.0021	38.6	0.0011
M07755_2.00:ZNF616	TCRCGCTCACCYNYN	0.1	-3.807	0.1454	68	0.0118	328.9	0.0091
M03301_2.00:POU1F1	AWTATGCAAATTAG	0.1	-3.803	0.1458	52	0.009	241.2	0.0067
M01477_2.00:ELF1:ELF2:ELF4:ELK1:ELK3:ELK4:ERF:ERG:ETS1:ETS2:ETV1:ETV2:ETV3:ETV3L:ETV4:ETV5:FEV:FLI1:GABPA	NRBCGGAARY	0.1	-3.799	0.1463	2419	0.4184	14635.2	0.4054
M08819_2.00:FOS:FOSB:FOSL1:FOSL2	GRTGACTCAYCC	0.1	-3.796	0.1467	193	0.0334	1040.6	0.0288
M09390_2.00:SOX1:SOX10:SOX11:SOX12:SOX13:SOX14:SOX15:SOX17:SOX18:SOX2:SOX21:SOX3:SOX30:SOX4:SOX5:SOX6:SOX7:SOX8:SOX9:SRY	WAACAATR	0.1	-3.79	0.1472	1127	0.1949	6664.4	0.1846
M09404_2.00:SOX1:SOX10:SOX11:SOX12:SOX13:SOX14:SOX15:SOX17:SOX18:SOX2:SOX21:SOX3:SOX30:SOX4:SOX5:SOX6:SOX7:SOX8:SOX9:SRY	WAACAATR	0.1	-3.79	0.1472	1127	0.1949	6664.4	0.1846
M01742_2.00:MYF5:MYF6:MYOG	AACAGCTGW	0.1	-3.778	0.1489	826	0.1429	4830.5	0.1338
M07901_2.00:CTCF	CCCYCTRGTGG	0.1	-3.775	0.1492	266	0.046	1468.1	0.0407
M08736_2.00:PTF1A	SCAGCTGCYBCYTYYCCC	0.1	-3.766	0.1504	115	0.0199	592.1	0.0164
M08757_2.00:PTF1A	SCAGCTGCYBCYTYYCCC	0.1	-3.766	0.1504	115	0.0199	592.1	0.0164
M05023_2.00:CRX:DMBX1:DPRX:GSC:GSC2:OTX1:OTX2:PITX1:PITX2:PITX3:TPRX1	CTAATCCB	0.1	-3.754	0.152	1466	0.2536	8746.4	0.2423
M09530_2.00:ELF1:ELF2:ELF4:SPDEF	AVCAGGAWST	0.1	-3.744	0.1534	794	0.1373	4638.7	0.1285
M05887_2.00:NFKB1:NFKB2	VGGGRNTTYCCCB	0.1	-3.742	0.1536	438	0.0758	2491.4	0.069
M00160_2.00:FOXC2:FOXD1:FOXD2:FOXD3:FOXG1:FOXI1:FOXI2:FOXI3:FOXJ2:FOXJ3:FOXK1:FOXK2:FOXP1:FOXP3:FOXP4	NRTAAACAAA	0.1	-3.717	0.1574	1587	0.2745	9494.7	0.263
M06197_2.00:FOXA2:FOXC1:FOXC2:FOXD1:FOXD2:FOXD3:FOXD4:FOXD4L1:FOXD4L3:FOXD4L4:FOXD4L5:FOXD4L6:FOXE1:FOXE3:FOXF1:FOXF2:FOXG1:FOXI1:FOXI3:FOXL1:FOXL2:FOXS1	TVTAAACA	0.1	-3.71	0.1583	2273	0.3932	13738	0.3805
M04431_2.00:KLF1:KLF12:KLF2:KLF3:KLF4:KLF5:KLF6:KLF7:KLF8	RGCCGACGCCCA	0.1	-3.699	0.1599	25	0.0043	101.5	0.0028
M07932_2.00:SP2	GSCTAGAGCGGCCSC	0.1	-3.673	0.1638	17	0.0029	62.8	0.0017
M08925_2.00:ZBTB33	BTCTCGCGAGAYYTS	0.1	-3.673	0.1638	17	0.0029	62.3	0.0017
M10360_2.00:ZNF467	TGGGAGCTCCCC	0.1	-3.673	0.1638	17	0.0029	62.9	0.0017
M10014_2.00:MAF:MAFA:MAFB:MAFG:MAFK	CMATGACTCAGCAGA	0.1	-3.662	0.1654	14	0.0024	48.2	0.0013
M09475_2.00:MITF:TFE3:TFEB:TFEC	GTCACATGAY	0.1	-3.641	0.1688	449	0.0777	2562.6	0.071
M09055_2.00:ELF1:ELF2:ELF4:ELK1:ELK3:ELK4:ERF:ERG:ETS1:ETS2:ETV1:ETV2:ETV3:ETV3L:ETV4:ETV5:FEV:FLI1:GABPA	GRRGGMAGGAAGGRRGGR	0.1	-3.622	0.1718	147	0.0254	779.6	0.0216
M03588_2.00:TFAP2A:TFAP2B:TFAP2E	TGCCCBVGGGCA	0.1	-3.609	0.1739	282	0.0488	1569	0.0435
M02993_2.00:ELF1:ELF2:ELF4:ELK1:ELK3:ELK4:ERF:ERG:ETS1:ETS2:ETV1:ETV2:ETV3:ETV3L:ETV4:ETV5:FEV:FLI1:GABPA	ACCGGAWATCCGGH	0.1	-3.601	0.175	4	0.0007	7.3	0.0002
M04247_2.00:BACH1:BACH2	AAANCATGASTCATSNTTT	0.1	-3.601	0.175	4	0.0007	7.2	0.0002
M04835_2.00:FOXN2:FOXN3	NHGCGTCVHNNBGACGCNN	0.1	-3.601	0.175	4	0.0007	7.7	0.0002
M08870_2.00:MAZ	CYCCYCYCCCHCCCCCTCCCCC	0.1	-3.587	0.177	120	0.0208	625.4	0.0173
M08988_2.00:MAZ	CYCCYCYCCCHCCCCCTCCCCC	0.1	-3.587	0.177	120	0.0208	625.4	0.0173
M09016_2.00:SP1:SP3:SP5:SP6:SP8:SP9	CYCCTCCCCCYYCCCCYCCCCCYC	0.1	-3.577	0.1787	53	0.0092	250.3	0.0069
M06008_2.00:ARNT:ARNT2	GTACGTGAC	0.1	-3.576	0.1787	80	0.0138	399.7	0.0111
M09234_2.00:IRF3	GAAAGGGAAAGRGAAAGDGA	0.1	-3.576	0.1787	73	0.0126	360.8	0.01
M09241_2.00:IRF3	GAAAGGGAAAGRGAAAGDGA	0.1	-3.576	0.1787	73	0.0126	360.8	0.01
M07611_2.00:ZNF12	YNYTYSTYNCAGCAGCWG	0.1	-3.576	0.1787	85	0.0147	427.9	0.0119
M07833_2.00:FOS:FOSB:FOSL1:FOSL2	GGGTGASTCAT	0.1	-3.547	0.1835	172	0.0298	926.5	0.0257
M03280_2.00:MEIS1:MEIS2:MEIS3:PKNOX1:PKNOX2:TGIF1:TGIF2	TGACAGSTGTCA	0.1	-3.531	0.1863	28	0.0048	118.7	0.0033
M07835_2.00:JUN:JUNB:JUND	GATGACTCATH	0.1	-3.528	0.1867	170	0.0294	915.1	0.0253
M08718_2.00:MITF:TFEB	CACGTGACY	0.1	-3.512	0.1894	76	0.0131	378.6	0.0105
M08753_2.00:MITF:TFEB	CACGTGACY	0.1	-3.512	0.1894	76	0.0131	378.6	0.0105
M09788_2.00:MLXIPL	CACGTGMCHYCB	0.1	-3.504	0.1908	244	0.0422	1349.2	0.0374
M07998_2.00:PAX1:PAX2:PAX3:PAX5:PAX6:PAX7:PAX8:PAX9	GCAGCSRAGCGTGAC	0.1	-3.502	0.1909	25	0.0043	103	0.0029
M08756_2.00:USF1:USF2	GGGTCACGTGRCC	0.1	-3.498	0.1916	50	0.0086	235.1	0.0065
M07812_2.00:FOSL2	DRTGASTCATCCTB	0.1	-3.481	0.1947	123	0.0213	645.1	0.0179
M04058_2.00:MITF:TFE3	YGCACGTGACV	0.1	-3.471	0.1964	124	0.0214	651.7	0.0181
M07828_2.00:FOS:FOSB:FOSL1:FOSL2	BKRTGACTCATCCYY	0.1	-3.431	0.2042	100	0.0173	515.3	0.0143
M10851_2.00:POU5F1	TKWWATGCAAATK	0.1	-3.423	0.2058	352	0.0609	1993.4	0.0552
M08167_2.00:LEF1:TCF7:TCF7L1:TCF7L2	RAASATCAAAGGVA	0.1	-3.409	0.2085	135	0.0234	716.3	0.0198
M05251_2.00:CRX:DMBX1:DPRX:GSC:GSC2:OTX1:OTX2:PITX1:PITX2:PITX3:TPRX1	HTAATCCN	0.1	-3.404	0.2093	1441	0.2493	8623.2	0.2389
M08702_2.00:TFAP2A:TFAP2B:TFAP2C:TFAP2D:TFAP2E	TDGCCYCAGGSCAY	0.1	-3.39	0.2122	239	0.0413	1324.3	0.0367
M08907_2.00:KLF15	CCCCCCCCHBCYCCTCCCC	0.1	-3.359	0.2185	137	0.0237	729.8	0.0202
M08987_2.00:KLF15	CCCCCCCCHBCYCCTCCCC	0.1	-3.359	0.2185	137	0.0237	729.8	0.0202
M09750_2.00:TFAP2A:TFAP2B:TFAP2C:TFAP2D:TFAP2E	GCBNVGGSCYGVGGGS	0.1	-3.348	0.2208	317	0.0548	1788.3	0.0495
M09274_2.00:NR2C1:NR2C2:NR2F1:NR2F2:NR2F6:NR4A1:NR4A2:NR4A3:PPARD:PPARG:RARA:RARB:RARG:RORA:RORB:RORC:RXRA:RXRB:RXRG	AAAGGTCAV	0.1	-3.347	0.2208	1594	0.2757	9571.7	0.2651
M03270_2.00:MEIS1:MEIS2:MEIS3:PKNOX1:PKNOX2:TGIF1:TGIF2:TGIF2LX:TGIF2LY	TGACAGGTGTCA	0.1	-3.334	0.2235	7	0.0012	19	0.0005
M08070_2.00:JUN:JUNB:JUND	DGRTGACTCAK	0.1	-3.333	0.2235	264	0.0457	1474.5	0.0408
M01484_2.00:EHF:ELF1:ELF2:ELF3:ELF4:ELF5:ETV6:ETV7:FEV	ANSCGGAAGT	0.1	-3.333	0.2235	1574	0.2723	9449.3	0.2617
M03034_2.00:FOXC1:FOXC2:FOXD1:FOXD2:FOXD3:FOXD4:FOXD4L1:FOXD4L3:FOXD4L4:FOXD4L5:FOXD4L6:FOXE1:FOXE3:FOXF1:FOXF2:FOXG1:FOXI1:FOXI3:FOXL1:FOXL2:FOXS1	RTAAACA	0.1	-3.326	0.2248	1918	0.3318	11575.5	0.3206
M05819_2.00:TBX15:TBX18:TBX20:TBX4:TBX5	RAGGTGTGARGGYGTGAN	0.1	-3.324	0.2249	12	0.0021	41.6	0.0012
M01497_2.00:MAX	NCACATGBH	0.1	-3.321	0.2254	2815	0.4869	17150.7	0.4751
M07829_2.00:JUN:JUNB:JUND	NKRTGACTCATBCYY	0.1	-3.28	0.2347	134	0.0232	714	0.0198
M04717_2.00:EHF:ELF1:ELF2:ELF3:ELF4:ELF5:ELK1:ELK3:ELK4:ERF:ERG:ETS1:ETS2:ETV1:ETV2:ETV3:ETV3L:ETV4:ETV5:ETV6:ETV7:FEV:FLI1:GABPA:SPDEF	RAYGCGGAAGTG	0.1	-3.279	0.2348	36	0.0062	163.9	0.0045
M10264_2.00:SP1:SP3:SP4:SP5:SP6:SP8:SP9	AGCCTTGGGGAGGG	0.1	-3.277	0.2351	84	0.0145	428.9	0.0119
M02868_2.00:DBP	BATTACGTAAYM	0.1	-3.265	0.2378	32	0.0055	142.7	0.004
M07905_2.00:CTCF	YGCCCYCTRGTG	0.1	-3.254	0.2402	183	0.0317	1000.2	0.0277
M04121_2.00:MYF5:MYOD1:MYOG	YAACAGCTGTCG	0.1	-3.254	0.2402	133	0.023	709.7	0.0197
M10826_2.00:POU2F1	HKVAATATGCAAATTTSNN	0.1	-3.237	0.2437	26	0.0045	111.5	0.0031
M07841_2.00:MAF:MAFA:MAFB:MAFG:MAFK	GCTGASTCAGCAAWT	0.1	-3.237	0.2437	14	0.0024	51.5	0.0014
M02781_2.00:MITF:TFEB	RTCACGTGAC	0.1	-3.216	0.2486	297	0.0514	1675.2	0.0464
M01000_2.00:JUN:JUNB:JUND	NATGACTCAY	0.1	-3.213	0.2491	364	0.063	2076	0.0575
M05742_2.00:NFIA:NFIB:NFIC:NFIX	STTGGCRNNGTGCCARS	0.1	-3.199	0.2522	23	0.004	96.4	0.0027
M08318_2.00:ZNF394	BCHGCYCCAGCTACTCCTCC	0.1	-3.199	0.2522	23	0.004	96.1	0.0027
M04398_2.00:ZNF143:ZNF76	NHTWCCCAYAATGCAYYGCGC	0.1	-3.189	0.2544	4	0.0007	8.9	0.0002
M08810_2.00:MAF:MAFA:MAFB:MAFG:MAFK	TGCTGASTCAGCADWTTT	0.1	-3.189	0.2544	4	0.0007	8.7	0.0002
M03433_2.00:ESR1:ESR2:NR1D1:NR1D2:NR1H2:NR1H3:NR1H4:NR2C1:NR2C2:NR2F1:NR2F2:NR2F6:NR4A1:NR5A2:NR6A1:PPARA:PPARD:PPARG:RARA:RARB:RARG:RORA:RORB:RORC:RXRA:RXRB:RXRG	AGGTCACBYAAAGGTCA	0.1	-3.181	0.2558	2	0.0003	2.7	0.0001
M04491_2.00:ZIC1:ZIC2:ZIC3:ZIC4:ZIC5	VGACCCCCCGCTGTGM	0.1	-3.181	0.2558	2	0.0003	2	0.0001
M04638_2.00:ZNF580	CCTACCCTYGCCTACCCT	0.1	-3.181	0.2558	2	0.0003	2.9	0.0001
M10313_2.00:ZSCAN26	NTGGGGGGCATA	0.1	-3.177	0.2566	18	0.0031	72	0.002
M07773_2.00:ZNF432	TTYCTCYCCCTYCCCYYCYCCWTYCCTCTC	0.1	-3.176	0.2568	19	0.0033	76.4	0.0021
M09814_2.00:USF2	NNVCCACGTGACC	0.1	-3.174	0.257	320	0.0554	1814.1	0.0502
M04509_2.00:ZNF281	GCCCCTCCCCCA	0.1	-3.174	0.257	162	0.028	880.4	0.0244
M10483_2.00:EHF:ELF1:ELF2:ELF3:ELF4:ELF5:ELK1:ELK3:ELK4:ERF:ERG:ETS1:ETS2:ETV1:ETV2:ETV3:ETV3L:ETV4:ETV5:ETV6:ETV7:FEV:FLI1:GABPA:SPDEF	ACTTCCGGG	0.1	-3.173	0.257	135	0.0234	723.5	0.02
M10501_2.00:EHF:ELF1:ELF2:ELF3:ELF4:ELF5:ETV6:ETV7:SPI1:SPIC	AWAAGGAAGTW	0.1	-3.149	0.2628	785	0.1358	4626	0.1281
M08882_2.00:EGR1:EGR2:EGR3:EGR4	CYYCCGCCCMCGCHCHC	0.1	-3.145	0.2636	226	0.0391	1257.8	0.0348
M04268_2.00:BATF:BATF3	GATGACGTCATC	0.1	-3.136	0.266	33	0.0057	149	0.0041
M07716_2.00:ZNF398	CTCYYTCCCTCCCT	0.1	-3.135	0.2661	220	0.0381	1222.3	0.0339
M09837_2.00:MAX	CCRGCCACGTGC	0.1	-3.108	0.273	177	0.0306	970	0.0269
M08797_2.00:JUN:JUNB:JUND	RRTGACTCAYC	0.1	-3.085	0.2791	244	0.0422	1367	0.0379
M06018_2.00:JUN:JUNB:JUND	RATGASTCAYC	0.1	-3.069	0.2835	216	0.0374	1201.7	0.0333
M08332_2.00:ZNF280A	TCTCTCCAGTGTGAATTCTCTGAT	0.1	-3.053	0.2878	9	0.0016	29.3	0.0008
M02998_2.00:ELF1:ELF2:ELF4:ELK1:ELK3:ELK4:ERF:ERG:ETS1:ETS2:ETV1:ETV2:ETV3:ETV3L:ETV4:ETV5:FEV:FLI1:GABPA	ACCGGAAATCCGGT	0.1	-3.047	0.2891	3	0.0005	5.8	0.0002
M05685_2.00:PAX1:PAX2:PAX3:PAX5:PAX6:PAX7:PAX8:PAX9	NGNGCASTCAWGCGTGACGR	0.1	-3.047	0.2891	3	0.0005	5.6	0.0002
M09993_2.00:CEBPA:CEBPB:CEBPE	RDRTTDTGMAATVK	0.1	-3.01	0.2998	692	0.1197	4069	0.1127
M07662_2.00:HKR1	VYBGTSTCCTCCCTNGTCCMS	0.1	-2.997	0.3034	45	0.0078	216.2	0.006
M07823_2.00:ATF3:JDP2	GGTCACGTGAC	0.1	-2.996	0.3034	86	0.0149	446.9	0.0124
M11241_2.00:RELA	AAAGTCCC	0.1	-2.978	0.3088	274	0.0474	1549.8	0.0429
M04639_2.00:ZNF580	CCTACCCTHCNMCTACCCT	0.1	-2.971	0.3107	8	0.0014	25.1	0.0007
M09521_2.00:E2F1:E2F2:E2F3:E2F4:E2F5:E2F6	CWGGCGGGAA	0.1	-2.968	0.3114	85	0.0147	441.2	0.0122
M02753_2.00:TFAP2A:TFAP2B:TFAP2C:TFAP2D:TFAP2E	TGCCCYRRGGCA	0.1	-2.962	0.313	220	0.0381	1229.4	0.0341
M07827_2.00:FOS:FOSB:FOSL1:FOSL2	ATGACTCACYC	0.1	-2.958	0.314	252	0.0436	1419.4	0.0393
M10605_2.00:GCM2	VDACCCGCATATW	0.1	-2.95	0.3161	53	0.0092	261.1	0.0072
M02792_2.00:USF1:USF2	RTCACGTGAY	0.1	-2.949	0.3164	323	0.0559	1843.3	0.0511
M09506_2.00:EGR1:EGR2:EGR3:EGR4	CRCCCACGCA	0.1	-2.945	0.3175	508	0.0879	2957.6	0.0819
M08161_2.00:NFKB1:RELA:RELB	GRATTCCCCNN	0.1	-2.94	0.3187	296	0.0512	1682.2	0.0466
M02468_2.00:GMEB1:GMEB2	NBACGYANN	0.1	-2.924	0.3235	2408	0.4165	14659.8	0.4061
M08828_2.00:FOS:FOSB:FOSL1:FOSL2	GRTGACTCAYC	0.1	-2.92	0.3245	266	0.046	1504.3	0.0417
M08876_2.00:KLF1:KLF12:KLF2:KLF3:KLF4:KLF5:KLF6:KLF7:KLF8	CCCRGCCCCGCCCHBCCCC	0.1	-2.909	0.3278	102	0.0176	540.1	0.015
M08982_2.00:KLF1:KLF12:KLF2:KLF3:KLF4:KLF5:KLF6:KLF7:KLF8	CCCRGCCCCGCCCHBCCCC	0.1	-2.909	0.3278	102	0.0176	540.1	0.015
M09886_2.00:TCF12:TCF3:TCF4	RCAGGTGY	0.1	-2.905	0.3287	1652	0.2858	9973.3	0.2762
M04201_2.00:NEUROG1	RVCATATGBY	0.1	-2.904	0.3289	181	0.0313	1002	0.0278
M07936_2.00:ZNF274	TTCTCTCCAGTATGA	0.1	-2.894	0.3317	12	0.0021	44.1	0.0012
M08864_2.00:PATZ1	CCYCCBCCCCCKCCCCCTCCCC	0.1	-2.892	0.3324	51	0.0088	251.8	0.007
M07954_2.00:ELF1:ELF2:ELF4:ELK1:ELK3:ELK4:ERF:ERG:ETS1:ETS2:ETV1:ETV2:ETV3:ETV3L:ETV4:ETV5:FEV:FLI1:GABPA	GVRCCGGAAGTGGN	0.1	-2.885	0.3345	61	0.0106	307	0.0085
M10237_2.00:ZNF281	TGGGGGAGGGG	0.1	-2.862	0.3418	399	0.069	2304	0.0638
M08094_2.00:ZBTB33	YTCTCGCGAGAYYTS	0.1	-2.853	0.3447	15	0.0026	59.4	0.0016
M04008_2.00:NFE2:NFE2L1:NFE2L2:NFE2L3	ATGACTCAY	0.1	-2.849	0.3459	192	0.0332	1069	0.0296
M04199_2.00:BHLHE22:BHLHE23	AMCATATGKT	0.1	-2.845	0.3469	101	0.0175	536.2	0.0149
M08162_2.00:RFX1:RFX2:RFX3:RFX4:RFX6	GTTGCCATGGMRAC	0.1	-2.844	0.3471	30	0.0052	137.6	0.0038
M00817_2.00:ESR1:ESR2:ESRRA:ESRRB:ESRRG	CAAGGTCA	0.1	-2.842	0.3475	1308	0.2263	7857.5	0.2176
M05502_2.00:POU5F1	WTATGCGCATAW	0.1	-2.84	0.348	4	0.0007	10	0.0003
M11431_2.00:GTF2B	CACTATRAAAG	0.1	-2.835	0.3495	525	0.0908	3067.3	0.085
M06502_2.00:CRX:DMBX1:DPRX:GSC:GSC2:OTX1:OTX2:PITX1:PITX2:PITX3:TPRX1	TAATCC	0.1	-2.833	0.3499	1730	0.2993	10463.5	0.2898
M07680_2.00:ZNF749	AACCCCAAC	0.1	-2.832	0.35	538	0.0931	3146.9	0.0872
M08133_2.00:SIX1:SIX2:SIX4:SIX5	NNCTGAAACCTGATMC	0.1	-2.822	0.353	22	0.0038	95.2	0.0026
M11376_2.00:EOMES:TBX2:TBX20:TBX3:TBX4:TBX5	YMTTCTCACACCTGH	0.1	-2.816	0.3548	88	0.0152	462.7	0.0128
M06436_2.00:PAX1:PAX2:PAX3:PAX5:PAX6:PAX7:PAX8:PAX9	VNNMNNCANYCAASCGTGA	0.1	-2.812	0.3562	34	0.0059	159.8	0.0044
M08338_2.00:ZNF692	GGYGGGGCCCACC	0.1	-2.785	0.3656	137	0.0237	747.5	0.0207
M09468_2.00:NPAS2	GTCACGTGGM	0.1	-2.785	0.3656	592	0.1024	3477.2	0.0963
M08967_2.00:ZBTB17	CCKCCCCTCCCCCDCCSCC	0.1	-2.779	0.367	96	0.0166	509.5	0.0141
M08110_2.00:E2F1:E2F2:E2F3:E2F4:E2F5:E2F6	HRHKSGCGSGAAATT	0.1	-2.763	0.3724	12	0.0021	45.2	0.0013
M10007_2.00:MAF:MAFA:MAFB:MAFG:MAFK:NRL	TRGAGGGAAGTTGSCT	0.1	-2.763	0.3724	12	0.0021	45.6	0.0013
M08160_2.00:PAX1:PAX2:PAX3:PAX5:PAX6:PAX7:PAX8:PAX9	RAGCGTGACCNN	0.1	-2.754	0.3756	119	0.0206	643.6	0.0178
M09822_2.00:HES1:HES4	AVSBCTYGTGSCYMG	0.1	-2.737	0.3817	122	0.0211	661.2	0.0183
M08709_2.00:MITF:TFE3	TCACGTGACC	0.1	-2.731	0.3836	107	0.0185	574.7	0.0159
M08743_2.00:MITF:TFE3:TFEB:TFEC	TCACGTGACC	0.1	-2.731	0.3836	107	0.0185	574.7	0.0159
M03178_2.00:MEIS1:MEIS2:MEIS3:PKNOX1:PKNOX2:TGIF1:TGIF2:TGIF2LX:TGIF2LY	TGACAGSTGTCA	0.1	-2.723	0.386	9	0.0016	31.5	0.0009
M07933_2.00:ZNF274	TTTCTCTCCAGTATGAA	0.1	-2.723	0.386	9	0.0016	32	0.0009
M07804_2.00:MYC	ASCACGTGGCN	0.1	-2.719	0.3871	463	0.0801	2699.6	0.0748
M04094_2.00:MSC:TCF21	CAACAGCTGTTR	0.1	-2.719	0.3871	47	0.0081	232.4	0.0064
M10549_2.00:FOXO1:FOXO3:FOXO4:FOXO6	MATAAACAAN	0.1	-2.718	0.3871	1837	0.3178	11138.4	0.3085
M04085_2.00:MYF5:MYF6:MYOG	BAACAGCTGWCR	0.1	-2.715	0.3877	211	0.0365	1186.1	0.0329
M09489_2.00:ATF3:JDP2	DATGASTCATHN	0.1	-2.71	0.3896	263	0.0455	1496.7	0.0415
M08758_2.00:NEUROG2:NEUROG3	GSARCAGATGGY	0.1	-2.707	0.3903	361	0.0624	2084.7	0.0577
M03332_2.00:IRF5	CCGAAACCGAAACT	0.1	-2.703	0.3917	7	0.0012	22.6	0.0006
M09688_2.00:HNF4A:HNF4G:NR2E1	AAAAGTCAAA	0.1	-2.692	0.3956	468	0.081	2731.8	0.0757
M00163_2.00:FOXI1:FOXJ3:FOXK1:FOXK2	GTAAACAA	0.1	-2.684	0.3984	1838	0.3179	11148.1	0.3088
M04549_2.00:ZNF274	NRCGAGAACTCAYACN	0.1	-2.682	0.3989	19	0.0033	81.3	0.0023
M05318_2.00:MEIS1:MEIS2:MEIS3:PKNOX1:PKNOX2:TGIF1:TGIF2:TGIF2LX:TGIF2LY	TGACAGCTGTCA	0.1	-2.682	0.3989	19	0.0033	81.9	0.0023
M08943_2.00:ZNF563	GGGNTCMTBDCHGGCAGCTGY	0.1	-2.68	0.3993	10	0.0017	36.5	0.001
M07798_2.00:BHLHE40:BHLHE41	GCACGTGACB	0.1	-2.666	0.4047	269	0.0465	1534.6	0.0425
M10169_2.00:GLIS3	GTGGGGGGTM	0.1	-2.663	0.4053	432	0.0747	2515.7	0.0697
M09845_2.00:BHLHE40:BHLHE41	SYSTCACGTGABCN	0.1	-2.659	0.4068	45	0.0078	222.4	0.0062
M02864_2.00:CREB3L1:CREB3L2:CREB3L4	TGCCACGTGGCA	0.1	-2.653	0.4089	11	0.0019	41.6	0.0012
M02766_2.00:TFAP2A:TFAP2B:TFAP2C:TFAP2D:TFAP2E	TGCCCBVGGGCA	0.1	-2.645	0.4119	182	0.0315	1017.5	0.0282
M08706_2.00:TFAP2A:TFAP2B:TFAP2C:TFAP2D:TFAP2E	BGSCCTGRGGCCR	0.1	-2.645	0.4119	514	0.0889	3013.8	0.0835
M10838_2.00:POU2F1	TNATTTGCATWW	0.1	-2.629	0.4179	635	0.1098	3751	0.1039
M09515_2.00:EGR1:EGR2:EGR3:EGR4	YCCGCCCACGCN	0.1	-2.62	0.4212	363	0.0628	2101.8	0.0582
M09684_2.00:PAX3:PAX7	YCAATYHGTCACGC	0.1	-2.616	0.4229	36	0.0062	173.2	0.0048
M08781_2.00:FOSL2	RATGACTCATYM	0.1	-2.608	0.426	205	0.0355	1155.9	0.032
M08363_2.00:SP1:SP3:SP4:SP5:SP8:SP9	CCCCGSCCCCKCCCC	0.1	-2.602	0.428	361	0.0624	2090.2	0.0579
M09805_2.00:TFAP4	MCAGCTGYGGBCN	0.1	-2.597	0.4298	429	0.0742	2501.8	0.0693
M11244_2.00:RELA	YGRGAAAAHCM	0.1	-2.594	0.4307	639	0.1105	3777	0.1046
M10238_2.00:ZNF148	CANCCYNWGGGTGDGG	0.1	-2.592	0.4312	41	0.0071	201.8	0.0056
M03532_2.00:LEF1:TCF7:TCF7L1:TCF7L2	AAAGATCAAAGG	0.1	-2.586	0.4337	35	0.0061	168.5	0.0047
M04052_2.00:TFAP2A:TFAP2B:TFAP2C:TFAP2D:TFAP2E	TGCCTSAGGCW	0.1	-2.57	0.4405	414	0.0716	2412	0.0668
M05252_2.00:CRX:DMBX1:DPRX:GSC:GSC2:OTX1:OTX2:PITX1:PITX2:PITX3:TPRX1	CTAATCCC	0.1	-2.561	0.444	1435	0.2482	8669.7	0.2401
M09547_2.00:FOXO1:FOXO3:FOXO4:FOXO6	GTAAACAG	0.1	-2.543	0.4517	1005	0.1738	6022.4	0.1668
M07775_2.00:ZNF486	GCCGAAACCCGGG	0.1	-2.539	0.4533	4	0.0007	10.5	0.0003
M04627_2.00:ZNF460	CAACGCCCCCCGM	0.1	-2.531	0.4565	15	0.0026	62.8	0.0017
M04066_2.00:TFAP4	AHCATATGDT	0.1	-2.525	0.4589	914	0.1581	5465	0.1514
M05841_2.00:JUN:JUNB:JUND	GATGACTCATM	0.1	-2.522	0.4601	88	0.0152	470.8	0.013
M11432_2.00:CARF	YCARAACGAGGC	0.1	-2.517	0.4617	13	0.0022	52.3	0.0014
M07788_2.00:USF2	GGTCACGTGRCSV	0.1	-2.502	0.4687	56	0.0097	287.5	0.008
M09142_2.00:SIX1:SIX2:SIX4:SIX5	TGWAAYYTGATMCY	0.1	-2.497	0.4704	102	0.0176	552.6	0.0153
M05775_2.00:LEF1:TCF7:TCF7L1:TCF7L2	ASATCAAAG	0.1	-2.495	0.4713	315	0.0545	1819.5	0.0504
M08342_2.00:ZNF596	GCTCKGBCTCYCTCT	0.1	-2.485	0.4757	216	0.0374	1226.2	0.034
M08089_2.00:CTCFL	RSYGCCCCCTGGYG	0.1	-2.485	0.4757	71	0.0123	373.7	0.0104
M05561_2.00:MYBL2	KTAACSGTTRN	0.1	-2.477	0.4786	80	0.0138	425.5	0.0118
M03529_2.00:SOX1:SOX10:SOX11:SOX12:SOX13:SOX14:SOX15:SOX17:SOX18:SOX2:SOX21:SOX3:SOX30:SOX4:SOX5:SOX6:SOX7:SOX8:SOX9:SRY	AACAATTKCATTGTT	0.1	-2.473	0.4794	2	0.0003	3.3	0.0001
M08934_2.00:ZNF708	GCTGTRCCTVCTTATTAGGC	0.1	-2.473	0.4794	2	0.0003	3.9	0.0001
M11412_2.00:THAP1	CCGCCATCTTGGWTVMGGGCARRD	0.1	-2.473	0.4794	2	0.0003	4	0.0001
M03611_2.00:NHLH1:NHLH2	RGCAYCAGCTGCGYCC	0.1	-2.47	0.4804	44	0.0076	220.8	0.0061
M00249_2.00:WT1	NCTCCCCCGCN	0.1	-2.464	0.4832	618	0.1069	3659.9	0.1014
M11200_2.00:TP53	GGRCATGYCYGGRCWTGYCY	0.1	-2.463	0.4832	8	0.0014	28.2	0.0008
M09864_2.00:ARNT:ARNT2	SVNNDRTCACGTGAYHNNBS	0.1	-2.447	0.4909	16	0.0028	68	0.0019
M04741_2.00:EHF:ELF1:ELF2:ELF3:ELF4:ELF5:ELK1:ELK3:ELK4:ERF:ERG:ETS1:ETS2:ETV1:ETV2:ETV3:ETV3L:ETV4:ETV5:ETV6:ETV7:FEV:FLI1:GABPA:SPDEF	RAYGCGGAAGTR	0.1	-2.441	0.4931	51	0.0088	260.1	0.0072
M05372_2.00:ARGFX	YTAATCTAATTAG	0.1	-2.44	0.4931	23	0.004	106	0.0029
M07947_2.00:EHF:ELF1:ELF2:ELF3:ELF4:ELF5:ELK1:ELK3:ELK4:ERF:ERG:ETS1:ETS2:ETV1:ETV2:ETV3:ETV3L:ETV4:ETV5:ETV6:ETV7:FEV:FLI1:GABPA:SPDEF	SGRACCCGGAAGTGG	0.1	-2.436	0.495	30	0.0052	143.9	0.004
M08206_2.00:GATA1:GATA2:GATA3:GATA4:GATA5:GATA6	GATAANVATCT	0.1	-2.434	0.4957	115	0.0199	630.8	0.0175
M10933_2.00:BORCS8-MEF2B:MEF2A:MEF2B:MEF2C:MEF2D	CKGTYTAAAAATAACYCA	0.1	-2.429	0.4978	9	0.0016	33.8	0.0009
M05633_2.00:NR1H3:NR2F1:NR2F2:NR2F6:PPARD:RORA:RORB:RORC:RXRA:RXRG:THRA:THRB	GTGACCTBANTRAGGTCAC	0.1	-2.428	0.4978	6	0.001	19.1	0.0005
M07948_2.00:EHF:ELF1:ELF2:ELF3:ELF4:ELF5:ELK1:ELK3:ELK4:ERF:ERG:ETS1:ETS2:ETV1:ETV2:ETV3:ETV3L:ETV4:ETV5:ETV6:ETV7:FEV:FLI1:GABPA:SPDEF	GAACCCGGAAGTGG	0.1	-2.421	0.5012	39	0.0067	193.8	0.0054
M10929_2.00:MEF2A	NKTWCCATAWATRGWAAB	0.1	-2.412	0.5052	27	0.0047	128	0.0035
M09394_2.00:LEF1:TCF7:TCF7L1:TCF7L2	VVASATCAAAGGV	0.1	-2.411	0.5052	162	0.028	908.9	0.0252
M09401_2.00:LEF1:TCF7:TCF7L1:TCF7L2	VVASATCAAAGGV	0.1	-2.411	0.5052	162	0.028	908.9	0.0252
M10848_2.00:POU3F1	RTTBCATTTGCATTWCAA	0.1	-2.41	0.5052	10	0.0017	38.8	0.0011
M00832_2.00:TBX1:TBX10	AGGTGTGAANN	0.1	-2.399	0.5105	716	0.1239	4263	0.1181
M05964_2.00:NHLH1:NHLH2	MCACCTGMGCCC	0.1	-2.39	0.5144	263	0.0455	1512.9	0.0419
M05828_2.00:XPA	CCACCTCACAC	0.1	-2.379	0.5196	355	0.0614	2067.7	0.0573
M11134_2.00:NR2C1:NR2C2:NR2F1:NR2F2:NR2F6:NR4A1:NR4A2:NR4A3:PPARD:PPARG:RARA:RARB:RARG:RORA:RORB:RORC:RXRA:RXRB:RXRG	BTGACCTTBB	0.1	-2.369	0.5249	986	0.1706	5922.9	0.1641
M11315_2.00:LEF1:TCF7:TCF7L1:TCF7L2	TCAAAGG	0.1	-2.357	0.5306	2020	0.3494	12316.8	0.3412
M02731_2.00:PRDM1	CACTTTCACTTT	0.1	-2.354	0.5317	16	0.0028	69.9	0.0019
M05481_2.00:POU3F2	TTATGCWAATGAG	0.1	-2.354	0.5317	16	0.0028	69	0.0019
M04099_2.00:MYF5:MYF6:MYOD1:MYOG	BAACAGCTGTYR	0.1	-2.353	0.5317	99	0.0171	540	0.015
M07817_2.00:JUN:JUNB:JUND	RTGASTCATCCYB	0.1	-2.345	0.5353	157	0.0272	881.5	0.0244
M09360_2.00:NFATC1:NFATC2:NFATC3:NFATC4	GASTCABWTTTTCCA	0.1	-2.342	0.5366	29	0.005	139.2	0.0039
M08050_2.00:USF2	NRRYCACGTGACCNNN	0.1	-2.338	0.5384	55	0.0095	286	0.0079
M09806_2.00:TFAP4	CWCAGCTGGT	0.1	-2.336	0.5389	746	0.129	4452.2	0.1233
M04341_2.00:JUN:JUNB:JUND	KATGACTCATM	0.1	-2.331	0.5414	111	0.0192	610.3	0.0169
M00300_2.00:HOXA13:HOXB13:HOXC13:HOXD13	TTTTATTA	0.1	-2.326	0.5438	2025	0.3503	12351.7	0.3421
M03140_2.00:HOXA10:HOXA11:HOXA9:HOXB9:HOXC10:HOXC11:HOXC12:HOXC9:HOXD10:HOXD11:HOXD12:HOXD9	TTTTATKRCY	0.1	-2.324	0.5447	1245	0.2154	7522.1	0.2084
M04745_2.00:EHF:ELF1:ELF2:ELF3:ELF4:ELF5:ELK1:ELK3:ELK4:ERF:ERG:ETS1:ETS2:ETV1:ETV2:ETV3:ETV3L:ETV4:ETV5:ETV6:ETV7:FEV:FLI1:GABPA:SPDEF	AATGCGGAAGTR	0.1	-2.32	0.5465	44	0.0076	223.4	0.0062
M09011_2.00:ZIC1:ZIC2:ZIC3:ZIC4	KGCYHCCTGCTGWGM	0.1	-2.319	0.5465	82	0.0142	441.1	0.0122
M11132_2.00:NR2C1:NR2C2:NR2F1:NR2F2:NR2F6:NR4A1:NR4A2:NR4A3:PPARD:PPARG:RARA:RARB:RARG:RORA:RORB:RORC:RXRA:RXRB:RXRG	RAAGGTCAVG	0.1	-2.316	0.5478	463	0.0801	2726.1	0.0755
M07950_2.00:ELF1:ELF2:ELF4:ELK1:ELK3:ELK4:ERF:ERG:ETS1:ETS2:ETV1:ETV2:ETV3:ETV3L:ETV4:ETV5:FEV:FLI1:GABPA	GCMTKCTGGGAATTGTAGTTC	0.1	-2.315	0.5481	8	0.0014	29.6	0.0008
M05890_2.00:LEF1:TCF7:TCF7L1:TCF7L2	NWASATCAAAGRV	0.1	-2.313	0.5486	225	0.0389	1288.3	0.0357
M04637_2.00:ZNF580	CCTACCCTCDCCTACCCY	1	-2.293	0.5594	12	0.0021	49.2	0.0014
M08722_2.00:TWIST1:TWIST2	TAATKRAAACCAGATGT	1	-2.286	0.5629	10	0.0017	39.2	0.0011
M04726_2.00:EHF:ELF1:ELF2:ELF3:ELF4:ELF5:ELK1:ELK3:ELK4:ERF:ERG:ETS1:ETS2:ETV1:ETV2:ETV3:ETV3L:ETV4:ETV5:ETV6:ETV7:FEV:FLI1:GABPA:SPDEF	AACCCGGAAGTR	1	-2.283	0.5641	20	0.0035	91	0.0025
M05635_2.00:NR1H3:NR2F1:NR2F2:NR2F6:PPARD:RORA:RORB:RORC:RXRA:RXRG:THRA:THRB	GTGACCTYANTRAGGTCAC	1	-2.277	0.5668	4	0.0007	11.2	0.0003
M08805_2.00:FOS:FOSB:FOSL1:FOSL2	GRTGACTCAYYC	1	-2.272	0.5689	232	0.0401	1332.9	0.0369
M08821_2.00:FOS:FOSB:FOSL1:FOSL2	GRTGACTCAYYC	1	-2.272	0.5689	232	0.0401	1332.9	0.0369
M05712_2.00:NFATC1:NFATC2:NFATC3:NFATC4	KTTTCCATYRATGGAAAM	1	-2.265	0.5721	3	0.0005	7.2	0.0002
M05726_2.00:RFX5:RFX7	HYRGCAACSGTTGCYAT	1	-2.265	0.5721	3	0.0005	7.1	0.0002
M02976_2.00:ELF1:ELF2:ELF4:SPDEF	ACCCGGATGTR	1	-2.263	0.573	34	0.0059	168.5	0.0047
M09239_2.00:IRF9	GAAAGCGAAACT	1	-2.26	0.5738	58	0.01	304.4	0.0084
M09240_2.00:IRF9	GAAAGCGAAACT	1	-2.26	0.5738	58	0.01	304.4	0.0084
M05836_2.00:JUN:JUNB:JUND	ATGACTCATH	1	-2.253	0.5774	239	0.0413	1375.2	0.0381
M08253_2.00:ZNF692	GGYGGGGCCCACC	1	-2.25	0.5787	118	0.0204	654.5	0.0181
M10353_2.00:PLAGL2	TGGGGAACCCCA	1	-2.248	0.5797	6	0.001	20.5	0.0006
M04917_2.00:ALX1:ALX3:ALX4:ARX:BARX1:BARX2:BSX:DLX2:DLX3:DLX5:DRGX:EMX1:EMX2:EN1:EN2:ESX1:EVX1:EVX2:GBX1:GBX2:GSX1:GSX2:HESX1:HOXA2:HOXA3:HOXB2:HOXB3:HOXD3:ISX:LBX1:LBX2:LHX1:LHX2:LHX3:LHX4:LHX5:LHX6:LHX8:LHX9:LMX1A:LMX1B:MEOX1:MIXL1:MNX1:MSX1:MSX2:NKX1-1:NKX1-2:NOBOX:NOTO:OTP:PDX1:PHOX2A:PHOX2B:PROP1:PRRX1:PRRX2:RAX:RAX2:SEBOX:SHOX:SHOX2:UNCX:VAX1:VAX2:VSX1:VSX2:ZFHX2:ZFHX3	BTAATTRG	1	-2.247	0.5798	1428	0.247	8661.6	0.2399
M03567_2.00:TBX15:TBX18:TBX20:TBX4:TBX5	GNAAAGGTGTGAAVK	1	-2.246	0.5798	52	0.009	270.5	0.0075
M09842_2.00:BHLHE40:BHLHE41	TCACGTGAC	1	-2.243	0.5812	187	0.0323	1064.9	0.0295
M03062_2.00:FOXI1:FOXJ3:FOXK1:FOXK2	GTAAACA	1	-2.238	0.5839	2966	0.5131	18224.9	0.5048
M04072_2.00:TFAP4	AHCATATGDT	1	-2.228	0.5891	1037	0.1794	6250	0.1731
M05898_2.00:SOX1:SOX10:SOX11:SOX12:SOX13:SOX14:SOX15:SOX17:SOX18:SOX2:SOX21:SOX3:SOX30:SOX4:SOX5:SOX6:SOX7:SOX8:SOX9:SRY	AACAATRG	1	-2.227	0.5894	2298	0.3975	14061.5	0.3895
M03673_2.00:SCRT1:SCRT2	RHGCAACAGGTGG	1	-2.221	0.5922	14	0.0024	60.1	0.0017
M01911_2.00:FBXL19:KDM2A:KDM2B	NNNNTACGN	1	-2.212	0.5974	3227	0.5582	19859.9	0.5501
M08846_2.00:JUN:JUNB:JUND	RTGACTCAYCC	1	-2.196	0.6064	241	0.0417	1390.5	0.0385
M08884_2.00:EGR1:EGR2:EGR3:EGR4	CCCCDCCCMCWCCCCCYC	1	-2.194	0.6072	204	0.0353	1168.9	0.0324
M04441_2.00:SNAI1	HRCACCTGCH	1	-2.181	0.6146	1386	0.2398	8409.2	0.2329
M08893_2.00:VEZF1	CCCCTCCCCCTCCCCCCTCCCC	1	-2.181	0.6146	96	0.0166	527.9	0.0146
M09219_2.00:POU2F1	AATSGAATGSAAAYAW	1	-2.179	0.6153	77	0.0133	416.6	0.0115
M09035_2.00:TFDP1:TFDP2:TFDP3	RGRRGGCGGGAAAN	1	-2.177	0.616	139	0.024	782	0.0217
M09456_2.00:BHLHE40:BHLHE41	KCACGTGMCN	1	-2.175	0.6166	358	0.0619	2098.4	0.0581
M08056_2.00:USF1:USF2	GGTCACGTGRY	1	-2.174	0.617	202	0.0349	1157.5	0.0321
M08742_2.00:OLIG2:OLIG3	VAGVARGRAARCAGMTGG	1	-2.17	0.6188	73	0.0126	393.5	0.0109
M08771_2.00:OLIG2:OLIG3	VAGVARGRAARCAGMTGG	1	-2.17	0.6188	73	0.0126	393.5	0.0109
M09846_2.00:MYCN	YMCCACGTGYMN	1	-2.169	0.6188	382	0.0661	2244.8	0.0622
M08108_2.00:TFDP1:TFDP2:TFDP3	SSGCGGGAAVN	1	-2.167	0.6195	168	0.0291	954.1	0.0264
M05963_2.00:NHLH1:NHLH2	CACCTGCDCC	1	-2.167	0.6195	332	0.0574	1941.1	0.0538
M10230_2.00:ZNF761	NGGTYGGGCAWA	1	-2.159	0.6235	42	0.0073	215.7	0.006
M04033_2.00:ATF3:JDP2	ATGACTCAY	1	-2.151	0.6283	292	0.0505	1700.6	0.0471
M02759_2.00:TFAP2A:TFAP2B:TFAP2C:TFAP2D:TFAP2E	TGCCCYAGGGCA	1	-2.146	0.6307	308	0.0533	1797.3	0.0498
M08336_2.00:ZNF16	WARAACCTTCYATGGCTC	1	-2.144	0.632	5	0.0009	16.3	0.0005
M05370_2.00:ARGFX	TTAATYTAATTAR	1	-2.133	0.6381	30	0.0052	149	0.0041
M04352_2.00:MAF:MAFA:MAFB:MAFG:MAFK:NRL	NTGCTGASTCAGCAN	1	-2.128	0.6408	14	0.0024	61.6	0.0017
M04530_2.00:ZNF444	CCGTCCCCCTCCCCCM	1	-2.127	0.6411	41	0.0071	210.5	0.0058
M09451_2.00:TFAP2A:TFAP2B:TFAP2C:TFAP2D:TFAP2E	SCCTSAGGSCAW	1	-2.123	0.6435	418	0.0723	2466.7	0.0683
M07994_2.00:HNF4G:NR1H4:NR2C1:NR2C2:NR2F1:NR2F2:NR2F6:NR4A1:NR4A2:NR4A3:NR5A1:NR5A2:NR6A1:PPARA:PPARD:PPARG:RARA:RARB:RARG:RORA:RORB:RORC:RXRA:RXRB:RXRG:THRA:THRB	GGKCARAGGTCARDG	1	-2.12	0.6451	145	0.0251	819.7	0.0227
M09553_2.00:GATA1:GATA2:GATA3:GATA4:GATA5:GATA6	NNNNNBAGATAWYATCTVHN	1	-2.118	0.6454	146	0.0253	825.9	0.0229
M09863_2.00:ARNT:ARNT2	GDWRTCACGTGVYCKB	1	-2.117	0.646	97	0.0168	536	0.0148
M04354_2.00:MAF:MAFA:MAFB:MAFG:MAFK:NRL	NTGCTGASTCAGCAN	1	-2.106	0.6524	13	0.0022	56.1	0.0016
M05032_2.00:MEIS1:MEIS2:MEIS3:PKNOX1:PKNOX2:TGIF1:TGIF2:TGIF2LX:TGIF2LY	TGACAGCTGTCA	1	-2.098	0.6573	50	0.0086	262.8	0.0073
M03600_2.00:MYOD1	RBAACAGCTGTTVY	1	-2.093	0.66	27	0.0047	132	0.0037
M09796_2.00:SREBF1:SREBF2	GTTGCCATGGCGAC	1	-2.093	0.66	16	0.0028	72.9	0.002
M08937_2.00:WT1	CYCCYCCYCCTCCCCCBCCC	1	-2.087	0.6626	97	0.0168	536.9	0.0149
M08968_2.00:WT1	CYCCYCCYCCTCCCCCBCCC	1	-2.087	0.6626	97	0.0168	536.9	0.0149
M10760_2.00:HMBOX1:HNF1A:HNF1B	GGGGTCAG	1	-2.086	0.6628	1966	0.3401	12017	0.3329
M03024_2.00:FOXO1:FOXO3:FOXO4:FOXO6	TTTCCCCACACG	1	-2.084	0.664	44	0.0076	228.3	0.0063
M10154_2.00:CTCF	DNYWATASTGCCATCTAGTGG	1	-2.082	0.665	6	0.001	21.6	0.0006
M07837_2.00:JUN:JUNB:JUND	RRRRRRATGASTCAT	1	-2.081	0.665	109	0.0189	607.6	0.0168
M05547_2.00:IRF7	HCGAAAVCGAAAVTA	1	-2.076	0.6675	30	0.0052	149.2	0.0041
M02938_2.00:ZNF652	WTTAACCCTTTVN	1	-2.072	0.6702	18	0.0031	84	0.0023
M04068_2.00:TFAP4	AHCATATGDT	1	-2.071	0.6702	842	0.1456	5066.1	0.1403
M07955_2.00:ELF1:ELF2:ELF4:ELK1:ELK3:ELK4:ERF:ERG:ETS1:ETS2:ETV1:ETV2:ETV3:ETV3L:ETV4:ETV5:FEV:FLI1:GABPA	CGGVRCCGGAAGTGV	1	-2.067	0.6725	33	0.0057	166.6	0.0046
M04047_2.00:TFAP2A:TFAP2B:TFAP2C:TFAP2D:TFAP2E	YSCCTSAGGSR	1	-2.064	0.6743	681	0.1178	4078.9	0.113
M09368_2.00:RFX1:RFX2:RFX3:RFX4:RFX6	CGGTTGCCATGGCRAC	1	-2.054	0.68	10	0.0017	41.7	0.0012
M04377_2.00:ATF6:ATF6B	TGCCACGTGGCA	1	-2.053	0.68	7	0.0012	26.7	0.0007
M09889_2.00:ARNTL	SGTCCGCGCCCCCKT	1	-2.053	0.68	7	0.0012	26.5	0.0007
M11031_2.00:SETDB1	CGVRGCATKCTGGGAAWTGTAGTY	1	-2.053	0.68	7	0.0012	26.5	0.0007
M05850_2.00:ZNF415	VTACACGATTAAKATC	1	-2.048	0.682	4	0.0007	12.4	0.0003
M10489_2.00:ELF1:ELF2:ELF4:ELK1:ELK3:ELK4:ERF:ERG:ETS1:ETS2:ETV1:ETV2:ETV3:ETV3L:ETV4:ETV5:FEV:FLI1:GABPA	AACCGGAAGTR	1	-2.048	0.682	4	0.0007	12.4	0.0003
M04993_2.00:ALX1:ALX3:ALX4:ARX:DRGX:EN1:EN2:ESX1:ISX:LHX2:LHX3:LHX4:LHX6:LHX8:LHX9:LMX1A:LMX1B:MIXL1:OTP:PHOX2A:PHOX2B:PROP1:PRRX1:PRRX2:RAX:RAX2:SEBOX:SHOX:SHOX2:UNCX:VSX1:VSX2:ZFHX2	TRATTGCAATYA	1	-2.045	0.6829	9	0.0016	36.9	0.001
M08916_2.00:ZNF274	TAGGGTTTCTCTCCAGTATG	1	-2.045	0.6829	9	0.0016	36.7	0.001
M04269_2.00:BATF:BATF3	GATGACGTCATC	1	-2.036	0.6889	52	0.009	276	0.0076
M04396_2.00:PRDM1	NCACTTTCMCTH	1	-2.03	0.6923	321	0.0555	1883.3	0.0522
M10137_2.00:PATZ1	DGGGGGGGGGCCA	1	-2.012	0.7049	179	0.031	1027.1	0.0285
M07794_2.00:MAX	GGGTCACGTGGBS	1	-2.011	0.705	117	0.0202	658	0.0182
M08350_2.00:ZBTB18	CACAKCTGG	1	-2.008	0.7062	745	0.1289	4476.3	0.124
M03291_2.00:PAX2:PAX4:PAX6	TTTCACGCATGAVTGMRCW	1	-1.999	0.7106	2	0.0003	4.2	0.0001
M04399_2.00:ZNF143:ZNF76	HTTACCCAYAATGCAYTGCDV	1	-1.999	0.7106	2	0.0003	4	0.0001
M04429_2.00:ZNF684	AYACAGTCCACCCCTTKA	1	-1.999	0.7106	2	0.0003	4.8	0.0001
M05815_2.00:TBX15:TBX18:TBX20:TBX4:TBX5	RAGGTGTGAASGYGTGAA	1	-1.999	0.7106	2	0.0003	4.3	0.0001
M00183_2.00:ESR1:ESR2:ESRRA:ESRRB:ESRRG	CAAGGTCAH	1	-1.999	0.7106	1267	0.2192	7695.9	0.2132
M09457_2.00:MYC	CACGTGGB	1	-1.998	0.7106	477	0.0825	2835.5	0.0785
M04146_2.00:USF1:USF2	HCCACGTGACV	1	-1.995	0.7123	204	0.0353	1178.6	0.0326
M02260_2.00:IRF5:IRF6	RCCGAAACYN	1	-1.994	0.7127	869	0.1503	5241	0.1452
M05490_2.00:POU3F1	TTATGCWAATKAG	1	-1.99	0.7152	22	0.0038	106.2	0.0029
M07748_2.00:ZNF28	GGGCACCCCRCCTGCCCC	1	-1.989	0.7152	12	0.0021	52.8	0.0015
M11292_2.00:SMAD1:SMAD3:SMAD5:SMAD9	AGGTCTATMCATC	1	-1.989	0.7152	12	0.0021	52.8	0.0015
M03117_2.00:CRX:DMBX1:DPRX:GSC:GSC2:OTX1:OTX2:PITX1:PITX2:PITX3:TPRX1	YTAATCCG	1	-1.986	0.7164	1497	0.259	9120.7	0.2526
M05284_2.00:IRX1:IRX3:IRX6	DACGCVTNNNNRYGCGTH	1	-1.984	0.7176	49	0.0085	259.5	0.0072
M03340_2.00:BORCS8-MEF2B:MEF2A:MEF2B:MEF2C:MEF2D	KCTAWAAATAGA	1	-1.98	0.7196	77	0.0133	422.9	0.0117
M02751_2.00:RUNX1:RUNX2:RUNX3	AACCRCAA	1	-1.98	0.7196	1108	0.1917	6715.6	0.186
M04492_2.00:ZIC1:ZIC2:ZIC3:ZIC4:ZIC5	NGACCCCCTGCTGTGM	1	-1.977	0.7211	3	0.0005	8.4	0.0002
M07813_2.00:NFE2:NFE2L1:NFE2L2:NFE2L3	VATGACTCAGCADWTTY	1	-1.967	0.7271	11	0.0019	47.2	0.0013
M09628_2.00:RFX1:RFX2:RFX3:RFX4:RFX6	KGTTGCCATGGCAAC	1	-1.967	0.7271	11	0.0019	47	0.0013
M03962_2.00:RFX1:RFX2:RFX3:RFX4:RFX6	GTTGCCAWTGGCAAC	1	-1.963	0.7292	5	0.0009	17.1	0.0005
M08851_2.00:ZNF263	CYCCYCCYCYYCCTCCTCCC	1	-1.958	0.7329	62	0.0107	335.3	0.0093
M10754_2.00:BARHL1:BARHL2:BSX:DLX2:EMX1:EMX2:EN1:EN2:GBX1:GBX2:GSX1:GSX2:HMX1:HMX2:HMX3:HOXA3:HOXA4:HOXA5:HOXB3:HOXB4:HOXB5:HOXC4:HOXC5:HOXD3:HOXD4:LBX2:MEOX1:MEOX2:MNX1:MSX1:MSX2:NANOG:NANOGP8:NKX1-1:NKX1-2:PDX1:TLX1:TLX2:TLX3:VAX1:VAX2:VENTX	CAAGTGCGTG	1	-1.953	0.7359	14	0.0024	63.3	0.0018
M10557_2.00:FOXA1:FOXA2:FOXA3:FOXB1:FOXS1	TGTTTGTT	1	-1.944	0.7422	1911	0.3306	11694.2	0.3239
M09627_2.00:RFX1:RFX2:RFX3:RFX4:RFX6	CGGTTGCCATGGCAAC	1	-1.931	0.7512	9	0.0016	37.4	0.001
M04282_2.00:JUN:JUNB:JUND	SGTGACGTCATS	1	-1.931	0.7512	46	0.008	243.2	0.0067
M03344_2.00:BORCS8-MEF2B:MEF2A:MEF2B:MEF2C:MEF2D	RCTAWAAATAGC	1	-1.929	0.7514	32	0.0055	163.1	0.0045
M07667_2.00:ZNF320	NSGCACWGGCCCCCKGGCCCC	1	-1.929	0.7514	6	0.001	22.9	0.0006
M10288_2.00:PLAG1	TGGGCTAGCCCC	1	-1.929	0.7514	6	0.001	22.1	0.0006
M11194_2.00:NR1H2:NR1H3:NR1H4:NR2C1:NR2C2:NR2F1:NR2F2:NR2F6:RARA:RARB:RARG:RORA:RORB:RORC:THRB:VDR	GGGTBAATRACCY	1	-1.924	0.7537	13	0.0022	58.7	0.0016
M06086_2.00:SCRT1:SCRT2	GHGCAACAGGTGG	1	-1.919	0.7569	43	0.0074	226.9	0.0063
M00368_2.00:NR1H2:NR1H3:NR1H4:NR2C1:NR2C2:NR2F1:NR2F2:NR2F6:RARA:RARB:RARG:RORA:RORB:RORC:RXRA:RXRB:RXRG:VDR	NGAGGTCAHN	1	-1.917	0.7581	2633	0.4555	16192.8	0.4485
M01114_2.00:MLX	NDTCACGTGN	1	-1.916	0.7581	416	0.072	2469.6	0.0684
M01743_2.00:MLXIP	ACACGTGC	1	-1.916	0.7581	416	0.072	2469.6	0.0684
M04080_2.00:MLX	BCACGTGN	1	-1.916	0.7581	416	0.072	2469.6	0.0684
M02707_2.00:NR1D2:NR2C1:NR2C2:NR2F1:NR2F2:NR2F6:NR4A1:PPARA:PPARD:PPARG:RARA:RARB:RARG:RORA:RORB:RORC:RXRA:RXRB:RXRG:THRA	GTAGGTCACBGTGACCYACT	1	-1.911	0.7581	1	0.0002	1.5	0
M02949_2.00:E2F1:E2F2:E2F3:E2F4:E2F5:E2F6	AAAAATGGCGCCAAAATG	1	-1.911	0.7581	1	0.0002	0	0
M02956_2.00:E2F1:E2F2:E2F3:E2F4:E2F5:E2F6	AAAAATGGCGCCAAAAHB	1	-1.911	0.7581	1	0.0002	0.8	0
M02995_2.00:ELF1:ELF2:ELF4:ELK1:ELK3:ELK4:ERF:ERG:ETS1:ETS2:ETV1:ETV2:ETV3:ETV3L:ETV4:ETV5:FEV:FLI1:GABPA	ACCGGAAATCCGGT	1	-1.911	0.7581	1	0.0002	0.8	0
M03000_2.00:ELF1:ELF2:ELF4:ELK1:ELK3:ELK4:ERF:ERG:ETS1:ETS2:ETV1:ETV2:ETV3:ETV3L:ETV4:ETV5:FEV:FLI1:GABPA	ACCGGAAATCCGGT	1	-1.911	0.7581	1	0.0002	1.3	0
M03380_2.00:NR1H3:NR2F1:NR2F2:NR2F6:PPARD:RORA:RORB:RORC:RXRA:RXRG:THRA:THRB	GTGACCTTANTAAGGTCAC	1	-1.911	0.7581	1	0.0002	0.8	0
M03472_2.00:GMEB1:GMEB2	TACGTGGTTACGTW	1	-1.911	0.7581	1	0.0002	0	0
M03485_2.00:SOX1:SOX10:SOX11:SOX12:SOX13:SOX14:SOX15:SOX17:SOX18:SOX2:SOX21:SOX3:SOX30:SOX4:SOX5:SOX6:SOX7:SOX8:SOX9:SRY	RAACAATTGCAGTGTTY	1	-1.911	0.7581	1	0.0002	0	0
M03488_2.00:SOX1:SOX10:SOX11:SOX12:SOX13:SOX14:SOX15:SOX17:SOX18:SOX2:SOX21:SOX3:SOX30:SOX4:SOX5:SOX6:SOX7:SOX8:SOX9:SRY	AACAATTGCAGTGTT	1	-1.911	0.7581	1	0.0002	0	0
M03491_2.00:SOX1:SOX10:SOX11:SOX12:SOX13:SOX14:SOX15:SOX17:SOX18:SOX2:SOX21:SOX3:SOX30:SOX4:SOX5:SOX6:SOX7:SOX8:SOX9:SRY	AACAATTGCAGTGTT	1	-1.911	0.7581	1	0.0002	0	0
M03492_2.00:SOX1:SOX10:SOX11:SOX12:SOX13:SOX14:SOX15:SOX17:SOX18:SOX2:SOX21:SOX3:SOX30:SOX4:SOX5:SOX6:SOX7:SOX8:SOX9:SRY	AACAATGTKCAGTGTT	1	-1.911	0.7581	1	0.0002	0	0
M03496_2.00:SOX1:SOX10:SOX11:SOX12:SOX13:SOX14:SOX15:SOX17:SOX18:SOX2:SOX21:SOX3:SOX30:SOX4:SOX5:SOX6:SOX7:SOX8:SOX9:SRY	GAACAATTGCAGTGTT	1	-1.911	0.7581	1	0.0002	0	0
M03505_2.00:SOX1:SOX10:SOX11:SOX12:SOX13:SOX14:SOX15:SOX17:SOX18:SOX2:SOX21:SOX3:SOX30:SOX4:SOX5:SOX6:SOX7:SOX8:SOX9:SRY	AAACAATTKCAGTGTTT	1	-1.911	0.7581	1	0.0002	0	0
M03526_2.00:SOX1:SOX10:SOX11:SOX12:SOX13:SOX14:SOX15:SOX17:SOX18:SOX2:SOX21:SOX3:SOX30:SOX4:SOX5:SOX6:SOX7:SOX8:SOX9:SRY	AACAATAWYCATTGTT	1	-1.911	0.7581	1	0.0002	1.4	0
M03549_2.00:EOMES:TBR1:TBX21	GGTGTGATATCACACC	1	-1.911	0.7581	1	0.0002	0.5	0
M03675_2.00:OSR2	YGCGTAASNCCGGTAGC	1	-1.911	0.7581	1	0.0002	1.1	0
M03944_2.00:PAX1:PAX2:PAX3:PAX5:PAX6:PAX7:PAX8:PAX9	CASTCATGCGTGACG	1	-1.911	0.7581	1	0.0002	0.8	0
M03966_2.00:RUNX1:RUNX2:RUNX3	WAACCRCATTAACCGCAA	1	-1.911	0.7581	1	0.0002	0	0
M03986_2.00:T:TBX19	AGGTGTGAAATDKVGSRGDRAGGTGTGAAD	1	-1.911	0.7581	1	0.0002	0	0
M04248_2.00:BACH1:BACH2	AAANCATGACGTCATGVTTT	1	-1.911	0.7581	1	0.0002	0	0
M04276_2.00:ATF4	GGATGACGTCATCC	1	-1.911	0.7581	1	0.0002	2	0.0001
M04571_2.00:ZNF454	TGGCGCCWGGCGCCA	1	-1.911	0.7581	1	0.0002	1.4	0
M04598_2.00:AC138696.1:ZFP41	CGCTAACTCTCCRCN	1	-1.911	0.7581	1	0.0002	1.3	0
M04615_2.00:ZNF177	BTCGRTCGARVGGMVMAGTCATK	1	-1.911	0.7581	1	0.0002	0	0
M04652_2.00:ZBTB22	HTCACTAYWRTAGTGAD	1	-1.911	0.7581	1	0.0002	1.5	0
M04738_2.00:ELF1:ELF2:ELF4:ELK1:ELK3:ELK4:ERF:ERG:ETS1:ETS2:ETV1:ETV2:ETV3:ETV3L:ETV4:ETV5:FEV:FLI1:GABPA	NACCGGATATCCGGTN	1	-1.911	0.7581	1	0.0002	1.6	0
M04739_2.00:ELF1:ELF2:ELF4:ELK1:ELK3:ELK4:ERF:ERG:ETS1:ETS2:ETV1:ETV2:ETV3:ETV3L:ETV4:ETV5:FEV:FLI1:GABPA	ACAGGAAGTRNYACTTCCTGT	1	-1.911	0.7581	1	0.0002	1.1	0
M04807_2.00:FOXP3	BATTTGTCATACAAATS	1	-1.911	0.7581	1	0.0002	1.2	0
M05423_2.00:PAX3:PAX7	YCGTCACGCTWATTAN	1	-1.911	0.7581	1	0.0002	0.5	0
M05426_2.00:PAX3:PAX7	YSGTCACGCTWATTAN	1	-1.911	0.7581	1	0.0002	0	0
M05517_2.00:HSF5:HSFX1:HSFX2:HSFY1:HSFY2	NDTGGAATGTTTRGAATGY	1	-1.911	0.7581	1	0.0002	0.4	0
M05725_2.00:RFX5:RFX7	SGTTGCTAKGCGTTGCTAK	1	-1.911	0.7581	1	0.0002	0.4	0
M07651_2.00:ZNF454	CGKAMACCCMCCRGGGCCSGGAGCCTTTT	1	-1.911	0.7581	1	0.0002	0	0
M08074_2.00:MAFF	WWTTTGCTGACTCAGCAAWWW	1	-1.911	0.7581	1	0.0002	1.2	0
M08313_2.00:ZNF41	TGGCTCTCCCTCATGGTGCCYYWYTCCCTTGTG	1	-1.911	0.7581	1	0.0002	0	0
M08346_2.00:ZNF454	KAARCCCMYCAGGGCCHRGAGCCTTTT	1	-1.911	0.7581	1	0.0002	0	0
M08896_2.00:ZNF41	CTCATGGTGCYTTAYTCCCTTGTG	1	-1.911	0.7581	1	0.0002	0.7	0
M08952_2.00:ZNF335	GGCTGTCCNBVGCGCTGCCTGW	1	-1.911	0.7581	1	0.0002	1.5	0
M08998_2.00:ZNF335	GGCTGTCCNBVGCGCTGCCTGW	1	-1.911	0.7581	1	0.0002	1.5	0
M09884_2.00:MITF:TFE3:TFEB:TFEC	GGACACGCGAAS	1	-1.911	0.7581	1	0.0002	1.6	0
M10013_2.00:MAFF	GGTTTATTAAACCA	1	-1.911	0.7581	1	0.0002	0.8	0
M10383_2.00:ZNF263	GDTGGAATAAGGGAGGCK	1	-1.911	0.7581	1	0.0002	0.6	0
M10771_2.00:BARHL1:BARHL2:BARX1:BARX2:BSX:DLX2:DLX3:EMX1:EMX2:ESX1:EVX1:EVX2:GBX1:GBX2:HESX1:HMX1:HMX2:HMX3:HOXA1:HOXA2:HOXA3:HOXA4:HOXA5:HOXB1:HOXB2:HOXB3:HOXB4:HOXB5:HOXC4:HOXC5:HOXD1:HOXD12:HOXD3:HOXD4:LBX1:LBX2:MEOX1:MEOX2:MNX1:MSX1:MSX2:NANOG:NANOGP8:NKX1-1:NKX1-2:PDX1:RAX:RAX2:TLX1:TLX3:VENTX	TTTTAATAAAAAAGGW	1	-1.911	0.7581	1	0.0002	0.8	0
M11201_2.00:TP53	GGACATGTYCGGACATGTYC	1	-1.911	0.7581	1	0.0002	1.6	0
M03131_2.00:HOXA10:HOXA11:HOXA9:HOXB9:HOXC10:HOXC11:HOXC12:HOXC9:HOXD10:HOXD11:HOXD12:HOXD9	DTTTTACGACY	1	-1.901	0.7581	253	0.0438	1479.1	0.041
M05317_2.00:MEIS1:MEIS2:MEIS3:PKNOX1:PKNOX2:TGIF1:TGIF2:TGIF2LX:TGIF2LY	TGACAGCTGTCA	1	-1.898	0.7581	23	0.004	113.5	0.0031
M00775_2.00:ZBTB1	NHCCCGCAHN	1	-1.887	0.7581	1148	0.1986	6973.6	0.1932
M07824_2.00:ATF3:JDP2	GGTCACGTGAC	1	-1.882	0.759	78	0.0135	431.3	0.0119
M04076_2.00:USF2	CCCACGTGACM	1	-1.881	0.7599	202	0.0349	1172.3	0.0325
M10326_2.00:ZNF883	KGTGGCTGCCTC	1	-1.873	0.7656	24	0.0042	119.7	0.0033
M08323_2.00:KLF15	CCCCBGCYCCGCCCC	1	-1.872	0.7659	273	0.0472	1602.9	0.0444
M07718_2.00:ZNF682	VVCCCYCSCVGGCCAAGCCCC	1	-1.87	0.7665	14	0.0024	64.4	0.0018
M04267_2.00:NFE2:NFE2L1:NFE2L2:NFE2L3	VATGASTCATB	1	-1.868	0.7673	141	0.0244	806.8	0.0223
M04131_2.00:HEY1:HEY2:HEYL	SACACGTGCC	1	-1.866	0.7683	427	0.0739	2540.4	0.0704
M10016_2.00:MAF:MAFA:MAFB:MAFG:MAFK	TGASTCAGCDY	1	-1.866	0.7683	159	0.0275	914.5	0.0253
M08276_2.00:PRDM1	YYYTCACTTTCHCTT	1	-1.865	0.7687	333	0.0576	1967.8	0.0545
M03723_2.00:EHF:ELF1:ELF2:ELF3:ELF4:ELF5:ELK1:ELK3:ELK4:ERF:ERG:ETS1:ETS2:ETV1:ETV2:ETV3:ETV3L:ETV4:ETV5:ETV6:ETV7:FEV:FLI1:GABPA:SPDEF	AACCCGGAAGTR	1	-1.856	0.7746	20	0.0035	97.7	0.0027
M02846_2.00:CREB3L1:CREB3L2	TGCCACGTGGCA	1	-1.845	0.7821	10	0.0017	43.3	0.0012
M10269_2.00:ZBTB33	TCTCGCGAG	1	-1.845	0.7821	10	0.0017	43.7	0.0012
M04512_2.00:KLF15	GCCACGCCCCCC	1	-1.837	0.7886	190	0.0329	1102.1	0.0305
M08733_2.00:USF1:USF2	GGTCACGTGRCC	1	-1.828	0.7948	76	0.0131	421.8	0.0117
M09524_2.00:E2F1:E2F2:E2F3:E2F4:E2F5:E2F6	GGCGGGAAAH	1	-1.825	0.7967	137	0.0237	784.5	0.0217
M07603_2.00:ZNF19	TGCNCCGTCAGRRCCCCW	1	-1.824	0.797	15	0.0026	70.8	0.002
M10448_2.00:E2F1:E2F2:E2F3:E2F4:E2F5:E2F6	TTGGCGCGAAAMVGVM	1	-1.823	0.7973	9	0.0016	38.9	0.0011
M07595_2.00:RBAK	GSCYBYTYCTCTCCC	1	-1.815	0.8035	408	0.0706	2428.8	0.0673
M08082_2.00:ZNF263	YCCTCCTCCYCYTCCTCCTCC	1	-1.81	0.8066	57	0.0099	310.7	0.0086
M00131_2.00:ZSCAN26	ATTAGTAC	1	-1.809	0.8066	1068	0.1847	6488.2	0.1797
M07987_2.00:AR:NR3C1:NR3C2:PGR	BNMNRGRACATTCTGTTCYYN	1	-1.808	0.8073	12	0.0021	54.9	0.0015
M08703_2.00:TFAP2A:TFAP2B:TFAP2C:TFAP2D:TFAP2E	ATKGCCYCAGGSCAT	1	-1.802	0.8113	143	0.0247	821.9	0.0228
M04529_2.00:ZNF444	SCGTCCCCCTCCCCCC	1	-1.8	0.8123	38	0.0066	200.5	0.0056
M10484_2.00:EHF:ELF1:ELF2:ELF3:ELF4:ELF5:ELK1:ELK3:ELK4:ERF:ERG:ETS1:ETS2:ETV1:ETV2:ETV3:ETV3L:ETV4:ETV5:ETV6:ETV7:FEV:FLI1:GABPA:SPDEF	AACCCGGAAGTR	1	-1.8	0.8123	38	0.0066	200.4	0.0055
M03565_2.00:TBX15:TBX18:TBX20:TBX4:TBX5	AGGTGTGAAGGTGTGA	1	-1.791	0.8189	7	0.0012	28.3	0.0008
M03458_2.00:RFX5:RFX7	SGTTGCCATGGCAACS	1	-1.787	0.8216	6	0.001	23.1	0.0006
M02787_2.00:ARNTL	GTCACGTGAC	1	-1.784	0.8234	16	0.0028	76.3	0.0021
M10612_2.00:TFCP2:UBP1	CHKCCCAGCCAC	1	-1.783	0.8238	1591	0.2752	9730.8	0.2695
M03646_2.00:HLF	GTTACGTAAC	1	-1.781	0.8252	32	0.0055	166.8	0.0046
M03347_2.00:MYBL2	WWAACCGTTAA	1	-1.78	0.8257	50	0.0086	270.8	0.0075
M10894_2.00:IRF7	TRGGAAATCGAAABTKRS	1	-1.778	0.8268	11	0.0019	49.8	0.0014
M10511_2.00:ELF1:ELF2:ELF4:ELK1:ELK3:ELK4:ERF:ERG:ETS1:ETS2:ETV1:ETV2:ETV3:ETV3L:ETV4:ETV5:FEV:FLI1:GABPA	MACTTCCTKTB	1	-1.776	0.8273	1669	0.2887	10215.3	0.283
M08704_2.00:TFAP2A:TFAP2B:TFAP2C:TFAP2D:TFAP2E	GCCTCAGGSCAT	1	-1.776	0.8273	371	0.0642	2205.5	0.0611
M04289_2.00:ATF3:JDP2	VATGASTCATS	1	-1.773	0.829	282	0.0488	1663.6	0.0461
M02786_2.00:MAX	AMCACGTGBY	1	-1.767	0.8339	392	0.0678	2334.4	0.0647
M10944_2.00:BORCS8-MEF2B:MEF2A:MEF2B:MEF2C:MEF2D	AWGCTAWAAATAGAWYB	1	-1.756	0.8421	19	0.0033	93.2	0.0026
M02767_2.00:TFAP2A:TFAP2B:TFAP2C:TFAP2D:TFAP2E	TGCCCYSRGGGCA	1	-1.755	0.8423	70	0.0121	388.2	0.0108
M05468_2.00:POU2F3	DTATGCWAATN	1	-1.748	0.8476	591	0.1022	3555.7	0.0985
M03195_2.00:MEIS1:MEIS2:MEIS3:PKNOX1:PKNOX2:TGIF1:TGIF2:TGIF2LX:TGIF2LY	TGACAGGTGTCA	1	-1.748	0.8476	10	0.0017	44.7	0.0012
M04203_2.00:NEUROG1	RACATATGTY	1	-1.741	0.8526	115	0.0199	656.3	0.0182
M04051_2.00:TFAP2A:TFAP2B:TFAP2C:TFAP2D:TFAP2E	YGCCTSRGGGCA	1	-1.741	0.8526	292	0.0505	1726.2	0.0478
M08366_2.00:ZNF490	GTTTGCTGCTTNCMA	1	-1.738	0.8546	40	0.0069	213.1	0.0059
M03546_2.00:EOMES:TBR1:TBX21	GGTGTGAWWTCACACC	1	-1.734	0.8569	3	0.0005	9.9	0.0003
M04266_2.00:NFE2:NFE2L1:NFE2L2:NFE2L3	VATGASTCATB	1	-1.726	0.8639	82	0.0142	461	0.0128
M10354_2.00:ZNF182	NKGTCAATCAGA	1	-1.723	0.8656	12	0.0021	55.3	0.0015
M04238_2.00:DBP	BRTTACRTAACV	1	-1.721	0.8664	33	0.0057	173.6	0.0048
M04071_2.00:TFAP4	AWCAGCTGWT	1	-1.72	0.867	647	0.1119	3902.3	0.1081
M10253_2.00:SP2	GNGGGGGGCGGGGCS	1	-1.713	0.8728	214	0.037	1254.1	0.0347
M11393_2.00:TBP:TBPL2	THTTTATAT	1	-1.707	0.877	1726	0.2986	10579.3	0.293
M03070_2.00:GCM1:GCM2	CATGCGGGTAC	1	-1.706	0.8777	66	0.0114	366.6	0.0102
M10216_2.00:EGR1:EGR2:EGR3:EGR4	ATGCGTGGGCGG	1	-1.703	0.8801	24	0.0042	122.3	0.0034
M03928_2.00:ESR1:ESR2:NR1D1:NR1D2:NR1H2:NR1H3:NR2C1:NR2C2:NR2F1:NR2F2:NR2F6:NR5A2:NR6A1:PPARA:PPARD:PPARG:RARA:RARB:RARG:RORA:RORB:RORC:RXRA:RXRB:RXRG:THRA:THRB	ATGTAGGTCAMN	1	-1.701	0.8807	80	0.0138	449.1	0.0124
M10242_2.00:ZNF589	CCAGGGTAWCAGCCG	1	-1.695	0.8858	8	0.0014	34.3	0.001
M06020_2.00:CREB3L1:CREB3L2	GVTBACGTGGCA	1	-1.691	0.8888	61	0.0106	337.2	0.0093
M09585_2.00:PAX3:PAX7	ACCRTGACTAATTNN	1	-1.683	0.8955	17	0.0029	83.9	0.0023
M02799_2.00:NEUROG2:NEUROG3	AACATATGTY	1	-1.681	0.8969	152	0.0263	881.4	0.0244
M08317_2.00:KLF10:KLF11	GCCMCGCCCCCNSCC	1	-1.679	0.8979	197	0.0341	1153.2	0.0319
M05500_2.00:POU3F4	TTATGCWAATKAG	1	-1.678	0.8983	13	0.0022	61.7	0.0017
M07810_2.00:USF1:USF2	GGTCACGTGRC	1	-1.675	0.9001	79	0.0137	444.5	0.0123
M09461_2.00:TCF12:TCF3:TCF4	ASATCAAAGGVA	1	-1.675	0.9001	104	0.018	593.9	0.0164
M03366_2.00:AR:NR3C1:NR3C2:PGR	KGGWACATHRTGTWCCY	1	-1.673	0.9011	7	0.0012	29.7	0.0008
M04789_2.00:EHF:ELF1:ELF2:ELF3:ELF4:ELF5:ETV6:ETV7	STGTGCGGATGCV	1	-1.667	0.905	4	0.0007	14.1	0.0004
M07710_2.00:ZNF33B	ATTMAATTCCYTCYSTTTAAA	1	-1.667	0.905	4	0.0007	14.8	0.0004
M07977_2.00:HSF1:HSF2:HSF4	GTCCCGGGTTCGAWTCCC	1	-1.667	0.905	4	0.0007	14.5	0.0004
M04288_2.00:ATF3:JDP2	GATGACRTCATC	1	-1.665	0.9057	51	0.0088	279.6	0.0077
M04813_2.00:FOXO1:FOXO3:FOXO4:FOXO6:FOXP4	WTCCCCACACR	1	-1.662	0.9082	287	0.0496	1701.2	0.0471
M03626_2.00:SREBF1:SREBF2	ATCACGTGAY	1	-1.66	0.9092	72	0.0125	403.6	0.0112
M07822_2.00:ATF3:JDP2	GGTCACGTGRC	1	-1.658	0.9109	93	0.0161	528.4	0.0146
M03374_2.00:ESR1:ESR2:NR1D1:NR1D2:NR1H2:NR1H3:NR1H4:NR2C1:NR2C2:NR2F1:NR2F2:NR2F6:NR4A1:NR5A2:NR6A1:PPARA:PPARD:PPARG:RARA:RARB:RARG:RORA:RORB:RORC:RXRA:RXRB:RXRG	AGGTCAASBARAGGTCA	1	-1.653	0.9109	2	0.0003	6	0.0002
M03401_2.00:ESR1:ESR2:ESRRA:ESRRB:ESRRG	AAGGTCATTCAAGGTCA	1	-1.653	0.9109	2	0.0003	5.6	0.0002
M03970_2.00:SOX1:SOX10:SOX11:SOX12:SOX13:SOX14:SOX15:SOX17:SOX18:SOX2:SOX21:SOX3:SOX30:SOX4:SOX5:SOX6:SOX7:SOX8:SOX9:SRY	NAACAATAVCATTGTTN	1	-1.653	0.9109	2	0.0003	5.2	0.0001
M04700_2.00:E2F1:E2F2:E2F3:E2F4:E2F5:E2F6	RWAWTGGCGCCAAAAH	1	-1.653	0.9109	2	0.0003	5.5	0.0002
M05422_2.00:PAX3:PAX7	CGATTCGTCACGSTN	1	-1.653	0.9109	2	0.0003	5.6	0.0002
M08949_2.00:ZFP28	TTCTATTTCTTCTTGWGTCA	1	-1.653	0.9109	2	0.0003	5.4	0.0001
M09876_2.00:NHLH1:NHLH2	DDGGGNCGCAGCTGCGBCCCCD	1	-1.653	0.9109	2	0.0003	5.2	0.0001
M04436_2.00:ZNF410	NTATTATGGGATGB	1	-1.651	0.9125	5	0.0009	19.7	0.0005
M04204_2.00:NEUROG1	RACATATGTY	1	-1.649	0.9139	115	0.0199	660.3	0.0183
M05548_2.00:IRF7	HNGAAAGTGAAAGTR	1	-1.648	0.9143	55	0.0095	303.5	0.0084
M04205_2.00:FIGLA	MCCACCTGB	1	-1.647	0.9143	1593	0.2756	9762.4	0.2704
M08803_2.00:JUN:JUNB:JUND	DVTGACTCABH	1	-1.642	0.9188	392	0.0678	2344.8	0.0649
M03691_2.00:SCRT1:SCRT2	AHGCAACAGGTGG	1	-1.64	0.9199	14	0.0024	67.8	0.0019
M06327_2.00:SIX3:SIX6	WAGTGATA	1	-1.634	0.9244	1413	0.2444	8648	0.2395
M08153_2.00:NR2C1:NR2C2:NR2F1:NR2F2:NR2F6:NR4A1:NR4A2:NR4A3:PPARD:PPARG:RARA:RARB:RARG:RORA:RORB:RORC:RXRA:RXRB:RXRG	NAAAGGTCAN	1	-1.632	0.9256	441	0.0763	2645.6	0.0733
M09198_2.00:SIX1:SIX2:SIX4:SIX5	WGAAACCTGASACC	1	-1.632	0.9256	165	0.0285	962.1	0.0266
M10939_2.00:BORCS8-MEF2B:MEF2A:MEF2B:MEF2C:MEF2D	YTAAAAATAGCY	1	-1.63	0.9267	97	0.0168	553.6	0.0153
M05875_2.00:POU5F1	WWTATGYAAATT	1	-1.629	0.9267	526	0.091	3167	0.0877
M10239_2.00:ZNF148	CCCCKCCCCCNC	1	-1.628	0.9275	518	0.0896	3118.2	0.0864
M07807_2.00:USF1:USF2	GGTCACGTGRCSSSS	1	-1.617	0.9366	30	0.0052	159	0.0044
M09453_2.00:TFAP4	NAHCAGCTGD	1	-1.616	0.9369	898	0.1553	5461.5	0.1513
M02461_2.00:GMEB1:GMEB2	BBACGYANN	1	-1.609	0.9438	2484	0.4297	15312	0.4241
M04024_2.00:NFE2:NFE2L1:NFE2L2:NFE2L3	ATGACTCAT	1	-1.608	0.9438	91	0.0157	518.4	0.0144
M09990_2.00:FOS:FOSB:FOSL1:FOSL2	RTGASTCAY	1	-1.608	0.9438	91	0.0157	518.4	0.0144
M03154_2.00:ALX1:ALX3:ALX4:ARX:DRGX:EN1:EN2:ESX1:HESX1:ISX:LHX2:LHX3:LHX4:LHX6:LHX8:LHX9:LMX1A:LMX1B:MIXL1:NOBOX:OTP:PHOX2A:PHOX2B:PROP1:PRRX1:PRRX2:RAX:RAX2:SEBOX:SHOX:SHOX2:UNCX:VSX1:VSX2:ZFHX2	KTAATTRR	1	-1.605	0.9451	1534	0.2654	9402.8	0.2604
M02858_2.00:MAF:MAFA:MAFB:MAFG:MAFK	NYGCTGASTCAGCAH	1	-1.605	0.9451	11	0.0019	51.5	0.0014
M03901_2.00:PAX6	VATTAYTCACGCWTGAN	1	-1.605	0.9451	11	0.0019	51.6	0.0014
M05627_2.00:HNF4A:HNF4G:NR2C1:NR2C2:NR2F1:NR2F2:NR2F6:NR6A1:PPARA:PPARD:RARA:RARB:RARG:RORA:RORB:RORC:RXRA:RXRB:RXRG	BTCAAGKTCAAGGTCAN	1	-1.602	0.9466	13	0.0022	62.3	0.0017
M04087_2.00:MYF5:MYF6:MYOG	BAACAGCTGTCR	1	-1.596	0.9517	184	0.0318	1079	0.0299
M11157_2.00:AR:NR3C1:NR3C2:PGR	GGTACABGRTGTTCT	1	-1.594	0.9532	18	0.0031	90.9	0.0025
M09812_2.00:USF2	GTCACGTGA	1	-1.591	0.9551	63	0.0109	352.3	0.0098
M06498_2.00:ISL1:ISL2:NOTO:SHOX:SHOX2:VSX1	TTAATKG	1	-1.585	0.9607	1921	0.3323	11810.4	0.3271
M04340_2.00:JUN:JUNB:JUND	GATGACKCATM	1	-1.583	0.9614	172	0.0298	1007.2	0.0279
M04723_2.00:EHF:ELF1:ELF2:ELF3:ELF4:ELF5:ELK1:ELK3:ELK4:ERF:ERG:ETS1:ETS2:ETV1:ETV2:ETV3:ETV3L:ETV4:ETV5:ETV6:ETV7:FEV:FLI1:GABPA:SPDEF	RAYGCGGAAGTG	1	-1.58	0.9645	34	0.0059	182.4	0.0051
M05191_2.00:PKNOX1:PKNOX2:TGIF1:TGIF2:TGIF2LX:TGIF2LY	TGACAGCTGTCA	1	-1.572	0.9713	30	0.0052	159.6	0.0044
M02836_2.00:ATF3:JDP2	ATGASTCAT	1	-1.57	0.9713	59	0.0102	329.5	0.0091
M02838_2.00:ATF3:JDP2	ATGACTCAT	1	-1.57	0.9713	59	0.0102	329.5	0.0091
M02861_2.00:ATF3:JDP2	ATGACTCAT	1	-1.57	0.9713	59	0.0102	329.5	0.0091
M04287_2.00:ATF3:JDP2	GATGASTCATC	1	-1.57	0.9713	59	0.0102	329.5	0.0091
M02819_2.00:MSC:TCF21	RCAACAGCTGTTGY	1	-1.569	0.9716	14	0.0024	68.2	0.0019
M03480_2.00:NFIA:NFIB:NFIC:NFIX	YTGGCACNDTGCCAA	1	-1.569	0.9716	10	0.0017	46.6	0.0013
M01728_2.00:MITF:TFEB	CACGTGAC	1	-1.564	0.9752	557	0.0964	3364.5	0.0932
M09647_2.00:EOMES:TBR1:TBX21:TBX5	AGGTGTTAAT	1	-1.563	0.9752	388	0.0671	2326.4	0.0644
M06007_2.00:ARNT:ARNT2	KCACGTGAC	1	-1.562	0.9757	120	0.0208	694.8	0.0192
M04342_2.00:JUN:JUNB:JUND	KATGASTCATM	1	-1.562	0.9757	85	0.0147	484.5	0.0134
M07618_2.00:ZNF701	CCYTTGGTGCTC	1	-1.559	0.9772	166	0.0287	972.5	0.0269
M07789_2.00:USF2	GGTCACGTGRCCV	1	-1.559	0.9772	52	0.009	288.8	0.008
M04351_2.00:MAF:MAFA:MAFB:MAFG:MAFK:NRL	HGTCAGCANWWTT	1	-1.557	0.9779	99	0.0171	568.1	0.0157
M03861_2.00:MEIS1:MEIS2:MEIS3:PKNOX1:PKNOX2:TGIF1:TGIF2:TGIF2LX:TGIF2LY	TGACAGCTGTCA	1	-1.554	0.9809	20	0.0035	102.4	0.0028
M02762_2.00:TFAP2A:TFAP2B:TFAP2C:TFAP2D:TFAP2E	TGCCYBRGGGCA	1	-1.546	0.9882	311	0.0538	1856.2	0.0514
M08073_2.00:JUN:JUNB:JUND	ARRRRATGASTCAT	1	-1.542	0.9915	148	0.0256	864.9	0.024
M09222_2.00:POU5F1	CCWTTGTTATGCAAAT	1	-1.54	0.9924	15	0.0026	74.1	0.0021
M04179_2.00:NEUROG2:NEUROG3	RACATATGTY	1	-1.536	0.9959	191	0.033	1125.5	0.0312
M03110_2.00:ALX1:ALX3:ALX4:ARX:DRGX:EN1:EN2:ESX1:ISX:LHX2:LHX3:LHX4:LHX6:LHX8:LHX9:LMX1A:LMX1B:MIXL1:OTP:PHOX2A:PHOX2B:PROP1:PRRX1:PRRX2:RAX:RAX2:SEBOX:SHOX:SHOX2:UNCX:VSX1:VSX2:ZFHX2	TGATTGCAATCA	1	-1.536	0.9959	6	0.001	25.4	0.0007
M03382_2.00:AR:NR3C1:NR3C2:PGR	GGGWACAYAATGTWCCC	1	-1.536	0.9959	6	0.001	25.5	0.0007
M09440_2.00:THAP11	KGCATKCTGGGARTTGTAGTYC	1	-1.536	0.9959	6	0.001	25.5	0.0007
M04152_2.00:HEY1	GACACGTGCC	1	-1.534	0.9959	329	0.0569	1967.8	0.0545
M04030_2.00:CREB3L1:CREB3L2	TGCCACGTGTACA	1	-1.532	0.9971	9	0.0016	41.3	0.0011
M08776_2.00:ARNTL	CCACGTGMC	1	-1.532	0.9971	738	0.1277	4483.4	0.1242
M09554_2.00:GATA1:GATA2:GATA3:GATA4:GATA5:GATA6	NAGATWNBNATCTNN	1	-1.529	0.9989	133	0.023	774.1	0.0214
M02990_2.00:ELF1:ERF:ETV6	CCGGAASCGGAAGTR	1	-1.528	0.9989	3	0.0005	10.1	0.0003
M09340_2.00:TP53	GGACATGCCCRGGCADGCCC	1	-1.528	0.9989	3	0.0005	10.1	0.0003
M10192_2.00:EGR1:EGR2:EGR3:EGR4	GCGGGGCATKCTGGGARTTGTAGT	1	-1.528	0.9989	3	0.0005	10.9	0.0003
M11199_2.00:TP53	RGACATGTCYRGACATGTCY	1	-1.528	0.9989	3	0.0005	10.5	0.0003
M07583_2.00:ZNF337	GAATTTRTCACCACT	1	-1.515	1	5	0.0009	20.9	0.0006
M09017_2.00:ZFX:ZFY	SVGSGSCSCAGGCCBSGGC	1	-1.513	1	57	0.0099	319.8	0.0089
M04260_2.00:ATF1:CREB1:CREM	RTGACRCGTCAY	1	-1.512	1	46	0.008	254.9	0.0071
M08188_2.00:ATF3:JDP2	GATGASTCAY	1	-1.51	1	93	0.0161	534.4	0.0148
M10221_2.00:ZNF740	TGGGGATCCCCC	1	-1.507	1	4	0.0007	15.5	0.0004
M04202_2.00:NEUROG1	RACATATGTY	1	-1.503	1	126	0.0218	733.7	0.0203
M04140_2.00:FERD3L	GTAACAGCTGTYGC	1	-1.5	1	14	0.0024	69.7	0.0019
M11323_2.00:SOX1:SOX10:SOX11:SOX12:SOX13:SOX14:SOX15:SOX17:SOX18:SOX2:SOX21:SOX3:SOX30:SOX4:SOX5:SOX6:SOX7:SOX8:SOX9:SRY	AACAAT	1	-1.497	1	2264	0.3916	13960.5	0.3867
M02790_2.00:HEY1:HEY2:HEYL	GGCACGTGYC	1	-1.496	1	198	0.0343	1171	0.0324
M09010_2.00:ZNF143:ZNF76	GRACTACAWTTCCCAGMAKGCC	1	-1.495	1	8	0.0014	36.4	0.001
M10300_2.00:SP1:SP3:SP4:SP5:SP8:SP9	NGGGGGCGGGGCB	1	-1.494	1	374	0.0647	2246.6	0.0622
M08298_2.00:KLF1:KLF12:KLF2:KLF3:KLF4:KLF5:KLF6:KLF7	GGCCCCGCCCH	1	-1.492	1	623	0.1078	3778.2	0.1047
M11385_2.00:TBX15:TBX18:TBX20:TBX4:TBX5	SGAGGTGTGAGGCGR	1	-1.489	1	12	0.0021	58.7	0.0016
M09425_2.00:EOMES:TBR1:TBX21	GDGDAGGTGTGAR	1	-1.487	1	737	0.1275	4482.6	0.1242
M04226_2.00:OLIG2:OLIG3	AMCATATGKT	1	-1.486	1	93	0.0161	535.6	0.0148
M01272_2.00:ZZZ3	TGAATCCATYN	1	-1.486	1	412	0.0713	2480.5	0.0687
M02696_2.00:MEF2A	HWTWCCAWAWATRGAAAK	1	-1.484	1	30	0.0052	161.3	0.0045
M10930_2.00:MEF2A	HWTWCCAWAWATRGAAAK	1	-1.484	1	30	0.0052	161.3	0.0045
M07792_2.00:MAX	VRRGCACGTGG	1	-1.48	1	522	0.0903	3157.3	0.0875
M08837_2.00:JUN:JUNB:JUND	RTGACTCABY	1	-1.477	1	340	0.0588	2039.5	0.0565
M04042_2.00:ATF6:ATF6B	TGCCACGTGGCA	1	-1.475	1	15	0.0026	75.1	0.0021
M04322_2.00:ATF3:JDP2	GATGACRTCATC	1	-1.474	1	38	0.0066	208.5	0.0058
M10875_2.00:HSF2:HSF4	AGAAMAGAAMKTTCT	1	-1.474	1	26	0.0045	138.5	0.0038
M09400_2.00:LEF1:TCF7:TCF7L1:TCF7L2	VRASATCAAAGRVRVV	1	-1.47	1	547	0.0946	3312.4	0.0917
M09558_2.00:GRHL1:GRHL2	VAAACYKGTHWAACMRGTTT	1	-1.459	1	7	0.0012	31.6	0.0009
M02774_2.00:MNT	AVCACGTGCH	1	-1.457	1	401	0.0694	2415.6	0.0669
M07811_2.00:USF1:USF2	SGGTCACGTGRCCV	1	-1.457	1	42	0.0073	232.4	0.0064
M02966_2.00:EHF:ELF1:ELF2:ELF3:ELF4:ELF5:ELK1:ELK3:ELK4:ERF:ERG:ETS1:ETS2:ETV1:ETV2:ETV3:ETV3L:ETV4:ETV5:ETV6:ETV7:FEV:FLI1:GABPA:SPDEF	AACCCGGAAGTR	1	-1.454	1	16	0.0028	81.6	0.0023
M08920_2.00:SP1:SP3:SP4:SP5:SP6:SP8:SP9	CCCCSGCCCCGCCCCCYCCC	1	-1.448	1	108	0.0187	627.9	0.0174
M08978_2.00:SP1:SP3:SP4:SP5	CCCCSGCCCCGCCCCCYCCC	1	-1.448	1	108	0.0187	627.9	0.0174
M10863_2.00:HSF1:HSF2:HSF4	AGAABGTTCG	1	-1.447	1	488	0.0844	2951.1	0.0817
M04610_2.00:ZNF501	MVGCGACGCGAACAC	1	-1.445	1	9	0.0016	42.9	0.0012
M02541_2.00:THAP12	CCCGCGGG	1	-1.445	1	20	0.0035	104.1	0.0029
M04295_2.00:CREB3L2:CREB3L4	CGCCACGTGGCM	1	-1.443	1	65	0.0112	369.3	0.0102
M08801_2.00:ATF3:JDP2	GGTSACGTGAB	1	-1.439	1	202	0.0349	1198.4	0.0332
M05719_2.00:RFX1:RFX2:RFX3:RFX4:RFX6	SGTTRCCATGGYAACV	1	-1.434	1	14	0.0024	70.9	0.002
M09942_2.00:ATF2	VGTGACGTMACY	1	-1.429	1	32	0.0055	174.9	0.0048
M03028_2.00:FOXA1:FOXA2:FOXA3:FOXB1:FOXB2	GAATGACACRGCGA	1	-1.424	1	6	0.001	26.7	0.0007
M03288_2.00:ALX1:ALX3:ALX4:ARX:DRGX:EN1:EN2:ESX1:ISX:LHX2:LHX3:LHX4:LHX6:LHX8:LHX9:LMX1A:LMX1B:MIXL1:OTP:PHOX2A:PHOX2B:PROP1:PRRX1:PRRX2:RAX:RAX2:SEBOX:SHOX:SHOX2:UNCX:VSX1:VSX2:ZFHX2	BTAATTAGBGBTAATTAG	1	-1.424	1	6	0.001	26.3	0.0007
M03445_2.00:PROX1:PROX2	TAAGRCGTCTTR	1	-1.424	1	6	0.001	26	0.0007
M06388_2.00:HSF1:HSF2	TCGAAWCTTCTAGA	1	-1.424	1	6	0.001	26.7	0.0007
M07678_2.00:ZNF529	YCYSSCYCYTCCTCCCSCTTCCCACCC	1	-1.424	1	6	0.001	26.7	0.0007
M08111_2.00:ELF1:ELF2:ELF4:ELK1:ELK3:ELK4:ERF:ERG:ETS1:ETS2:ETV1:ETV2:ETV3:ETV3L:ETV4:ETV5:FEV:FLI1:GABPA	GGAAGGAAGGAAGGAAGG	1	-1.424	1	6	0.001	26.9	0.0007
M04293_2.00:CREB3L2:CREB3L4	GGTGACGTCAYC	1	-1.423	1	33	0.0057	180.3	0.005
M11238_2.00:RELA	GGGRATTTC	1	-1.422	1	440	0.0761	2658.9	0.0736
M04241_2.00:CREB3:CREB3L1	GRTGACGTCAYS	1	-1.42	1	27	0.0047	145.1	0.004
M04310_2.00:CREB3L1:CREB3L2	GGTGACGTGGCA	1	-1.42	1	18	0.0031	93.3	0.0026
M05888_2.00:RFX1:RFX2:RFX3:RFX4:RFX6	BGTTGCCATGGYRAC	1	-1.413	1	28	0.0048	151.1	0.0042
M08365_2.00:ZSCAN30	GCCWGCRGCCHBCMS	1	-1.41	1	203	0.0351	1206.7	0.0334
M05213_2.00:ALX1:ALX3:ALX4:ARX:DRGX:EN1:EN2:ESX1:ISX:LHX2:LHX3:LHX4:LHX6:LHX8:LHX9:LMX1A:LMX1B:MIXL1:OTP:PHOX2A:PHOX2B:PROP1:PRRX1:PRRX2:RAX:RAX2:SEBOX:SHOX:SHOX2:UNCX:VSX1:VSX2:ZFHX2	HTAACGAG	1	-1.409	1	231	0.04	1377.8	0.0382
M08351_2.00:ZBTB42	CACAKCTGG	1	-1.407	1	880	0.1522	5376.3	0.1489
M05246_2.00:MEIS1:MEIS2:MEIS3:PKNOX1:PKNOX2:TGIF1:TGIF2:TGIF2LX:TGIF2LY	TGACAGCTGTCA	1	-1.406	1	29	0.005	157.7	0.0044
M03738_2.00:FOXC1:FOXC2:FOXE1:FOXG1:FOXI1:FOXI2:FOXI3:FOXL1:FOXL2	WWTRTTTACAACAAW	1	-1.404	1	8	0.0014	37.4	0.001
M04025_2.00:BATF:BATF3	GATGACGTCATC	1	-1.404	1	8	0.0014	37.9	0.001
M08245_2.00:ZNF41	TGGTGSYTTAYTYCC	1	-1.397	1	54	0.0093	305.1	0.0084
M10159_2.00:CTCF	CCRCNAGGKGGCRSTV	1	-1.396	1	95	0.0164	551.6	0.0153
M08083_2.00:PRDM1	TCACTTTCAC	1	-1.396	1	443	0.0766	2679.8	0.0742
M08208_2.00:SIX1:SIX2:SIX4:SIX5	GARTTGTAGT	1	-1.396	1	55	0.0095	311.2	0.0086
M06187_2.00:EHF:ELF1:ELF2:ELF3:ELF4:ELF5:ELK1:ELK3:ELK4:ERF:ERG:ETS1:ETS2:ETV1:ETV2:ETV3:ETV3L:ETV4:ETV5:ETV6:ETV7:FEV:FLI1:GABPA:SPDEF	ACCCGGAAGT	1	-1.395	1	16	0.0028	82.5	0.0023
M04485_2.00:ZIC1:ZIC2:ZIC3:ZIC4:ZIC5	GACCCCCCGCTGYGC	1	-1.392	1	13	0.0022	65.7	0.0018
M06223_2.00:CDX1:CDX2:CDX4:HOXA13:HOXC13	WTTTATTA	1	-1.389	1	2072	0.3584	12783.1	0.3541
M04105_2.00:MYF5:MYF6:MYOD1:MYOG	BAACAGCTGTYV	1	-1.387	1	77	0.0133	443.4	0.0123
M03533_2.00:SOX1:SOX10:SOX11:SOX12:SOX13:SOX14:SOX15:SOX17:SOX18:SOX2:SOX21:SOX3:SOX30:SOX4:SOX5:SOX6:SOX7:SOX8:SOX9:SRY	AACAATWDCATTGTT	1	-1.387	1	2	0.0003	6.2	0.0002
M04788_2.00:EHF:ELF1:ELF2:ELF3:ELF4:ELF5:ETV6:ETV7	ACCCGGAAGTARNNNNNAAAAAW	1	-1.387	1	2	0.0003	6.9	0.0002
M05706_2.00:NFATC1:NFATC2:NFATC3:NFATC4	TTTTCCATTAATGGAAAA	1	-1.387	1	2	0.0003	6.4	0.0002
M07608_2.00:ZNF382	TDGGGTCTGTASTRNTGTCTC	1	-1.387	1	2	0.0003	6.2	0.0002
M08291_2.00:ZNF419	AATMCAGCCCTAGACTCTCCY	1	-1.387	1	2	0.0003	6.9	0.0002
M10208_2.00:PLAGL2	GGGGGATCCCCA	1	-1.387	1	2	0.0003	6.9	0.0002
M04748_2.00:ELF1:ELF2:ELF4:SPDEF	NAMCCGGATGTN	1	-1.386	1	141	0.0244	830.1	0.023
M05603_2.00:NR2C1:NR2C2:NR2F1:NR2F2:NR2F6:NR4A1:NR4A2:NR4A3:PPARD:PPARG:RARA:RARB:RARG:RORA:RORB:RORC:RXRA:RXRB:RXRG	KAAAGGTCAN	1	-1.378	1	386	0.0668	2330.5	0.0646
M07724_2.00:ZNF695	TTCCTCY	1	-1.375	1	992	0.1716	6074.4	0.1683
M05751_2.00:SOX1:SOX10:SOX11:SOX12:SOX13:SOX14:SOX15:SOX17:SOX18:SOX2:SOX21:SOX3:SOX30:SOX4:SOX5:SOX6:SOX7:SOX8:SOX9:SRY	ACAATGGNNCCATTGT	1	-1.375	1	11	0.0019	54.9	0.0015
M03072_2.00:GRHL1	RAACCGGTTT	1	-1.372	1	50	0.0086	282.3	0.0078
M02782_2.00:BHLHE40:BHLHE41	VKCACGTGMC	1	-1.371	1	114	0.0197	667.8	0.0185
M07709_2.00:ZKSCAN5	TCACCTCCY	1	-1.368	1	525	0.0908	3187.2	0.0883
M10297_2.00:SP1:SP3:SP4:SP5:SP8:SP9	GGNDGGGGGCGGGG	1	-1.367	1	425	0.0735	2571.5	0.0712
M10254_2.00:SP2	YYGGCCCCGCCCCCC	1	-1.367	1	164	0.0284	971.2	0.0269
M04178_2.00:NHLH1:NHLH2	GGGBMKCAGCTGCGTCCC	1	-1.364	1	4	0.0007	16.8	0.0005
M04471_2.00:ZIC1:ZIC3:ZIC5	VGACCCCCCGCTGYGM	1	-1.364	1	4	0.0007	16.7	0.0005
M07729_2.00:ZNF780A	CCWRACYGCCTGCCWRAMCCNCCT	1	-1.364	1	4	0.0007	16.5	0.0005
M09411_2.00:STAT1	CCCMTTTCCHGGAAAWCHC	1	-1.362	1	9	0.0016	43.5	0.0012
M03805_2.00:ALX1:ALX3:ALX4:ARX:BARX1:BARX2:BSX:DLX1:DLX2:DLX3:DLX4:DLX5:DLX6:DRGX:EMX1:EMX2:EN1:EN2:ESX1:EVX1:EVX2:GBX1:GBX2:GSX1:GSX2:HMX1:HMX3:HOXA1:HOXA2:HOXA3:HOXA4:HOXA5:HOXA7:HOXB1:HOXB2:HOXB3:HOXB4:HOXB5:HOXB7:HOXC4:HOXC5:HOXD1:HOXD3:HOXD4:ISX:LHX2:LHX3:LHX4:LHX9:MEOX1:MEOX2:MIXL1:MNX1:MSX1:MSX2:NANOG:NANOGP8:NKX1-1:NKX1-2:NOTO:OTP:PDX1:PHOX2A:PHOX2B:PROP1:PRRX1:PRRX2:RAX:RAX2:SEBOX:SHOX:S…	STAATGAC	1	-1.36	1	1601	0.2769	9857.8	0.2731
M05813_2.00:TBX15:TBX18:TBX20:TBX4:TBX5	RAGGTGTGAAGGTGTGAA	1	-1.351	1	3	0.0005	11.6	0.0003
M07569_2.00:ZNF343	CGCTTCCCC	1	-1.348	1	689	0.1192	4202.4	0.1164
M09928_2.00:CEBPA:CEBPB:CEBPE	ATTDCVWMAB	1	-1.333	1	1997	0.3454	12326.3	0.3414
M09041_2.00:E2F1:E2F2:E2F3:E2F4:E2F5:E2F6	GRGGGCGGGAAR	1	-1.326	1	285	0.0493	1714.9	0.0475
M01749_2.00:BHLHA15	ACATATGG	1	-1.325	1	1236	0.2138	7595.4	0.2104
M03239_2.00:POU5F1B	TATGCAAAT	1	-1.32	1	598	0.1034	3643.4	0.1009
M09441_2.00:THAP11	KGCATBCTGGGARTTGTAGTYC	1	-1.32	1	6	0.001	27	0.0007
M06072_2.00:EGR1:EGR2:EGR3:EGR4	CCMCGCCCACRCAC	1	-1.319	1	251	0.0434	1506.9	0.0417
M03438_2.00:TP63:TP73	DACATGTCYNGACATGYM	1	-1.318	1	8	0.0014	38.6	0.0011
M08910_2.00:ZNF143:ZNF76	RRACTACAAYTCCCAGMAKGCM	1	-1.318	1	8	0.0014	38.5	0.0011
M08800_2.00:BACH1:BACH2	SSVTGACTCAGCA	1	-1.316	1	78	0.0135	452.2	0.0125
M08911_2.00:SP2	CCCCCGGCCCCGCCCCCYSCCC	1	-1.315	1	31	0.0054	171.6	0.0048
M08970_2.00:SP2	CCCCCGGCCCCGCCCCCYSCCC	1	-1.315	1	31	0.0054	171.6	0.0048
M00346_2.00:PAX1:PAX2:PAX3:PAX5:PAX6:PAX7:PAX8:PAX9	SGTCACGSTY	1	-1.315	1	455	0.0787	2761	0.0765
M04115_2.00:MAX	AKCACATGGY	1	-1.314	1	1501	0.2596	9243.1	0.256
M05313_2.00:PKNOX1:PKNOX2:TGIF1:TGIF2:TGIF2LX:TGIF2LY	TGACAGCTGTCA	1	-1.308	1	33	0.0057	183.9	0.0051
M09817_2.00:AHR	CTTGCGTGMGN	1	-1.308	1	420	0.0727	2546.7	0.0705
M03205_2.00:ALX1:ALX3:ALX4:ARX:BARX1:BARX2:BSX:DLX1:DLX2:DLX3:DLX4:DLX5:DLX6:DRGX:EMX1:EMX2:EN1:EN2:ESX1:EVX1:EVX2:GBX1:GBX2:GSX1:GSX2:HMX1:HMX3:HOXA1:HOXA2:HOXA3:HOXA4:HOXA5:HOXB1:HOXB2:HOXB3:HOXB4:HOXB5:HOXC4:HOXC5:HOXD1:HOXD3:HOXD4:ISX:LHX3:LHX4:MEOX1:MIXL1:MNX1:MSX1:MSX2:NKX1-1:NKX1-2:NOTO:OTP:PDX1:PHOX2A:PHOX2B:PROP1:PRRX1:PRRX2:RAX:RAX2:SEBOX:SHOX:SHOX2:UNCX:VAX1:VAX2:VENTX:VSX1:VSX2	NYTAATTAGD	1	-1.3	1	1425	0.2465	8773.5	0.243
M10686_2.00:HOXA10:HOXA11:HOXA5:HOXA6:HOXA7:HOXA9:HOXB5:HOXB6:HOXB8:HOXB9:HOXC10:HOXC11:HOXC5:HOXC6:HOXC8:HOXC9:HOXD10:HOXD11:HOXD8:HOXD9	ACNCATAAAA	1	-1.294	1	1175	0.2033	7221.5	0.2
M02903_2.00:KLF13:KLF9	ATGCCACGCCCCTTTTTG	1	-1.294	1	1	0.0002	2.9	0.0001
M03109_2.00:ALX1:ALX3:ALX4:ARX:DRGX:EN1:EN2:ESX1:ISX:LHX2:LHX3:LHX4:LHX6:LHX8:LHX9:LMX1A:LMX1B:MIXL1:OTP:PHOX2A:PHOX2B:PROP1:PRRX1:PRRX2:RAX:RAX2:SEBOX:SHOX:SHOX2:UNCX:VSX1:VSX2:ZFHX2	TAATYARCRCTAATTA	1	-1.294	1	1	0.0002	2.1	0.0001
M03395_2.00:ESR1:ESR2:NR1D1:NR1D2:NR1H2:NR1H3:NR1H4:NR2C1:NR2C2:NR2F1:NR2F2:NR2F6:NR4A1:NR4A2:NR4A3:NR5A2:NR6A1:PPARA:PPARD:PPARG:RARA:RARB:RARG:RORA:RORB:RORC:RXRA:RXRB:RXRG	RAGGTCAAGYAAAGGTCA	1	-1.294	1	1	0.0002	2.9	0.0001
M03398_2.00:ESR1:ESR2:ESRRA:ESRRB:ESRRG	AAGGTCATTCAAGGTCA	1	-1.294	1	1	0.0002	2.7	0.0001
M03517_2.00:SOX1:SOX10:SOX11:SOX12:SOX13:SOX14:SOX15:SOX17:SOX18:SOX2:SOX21:SOX3:SOX30:SOX4:SOX5:SOX6:SOX7:SOX8:SOX9:SRY	AAACAATTDCAKTGTTT	1	-1.294	1	1	0.0002	2.5	0.0001
M03522_2.00:SOX1:SOX10:SOX11:SOX12:SOX13:SOX14:SOX15:SOX17:SOX18:SOX2:SOX21:SOX3:SOX30:SOX4:SOX5:SOX6:SOX7:SOX8:SOX9:SRY	BAACAATAACATTGTTC	1	-1.294	1	1	0.0002	2.3	0.0001
M03538_2.00:SOX1:SOX10:SOX11:SOX12:SOX13:SOX14:SOX15:SOX17:SOX18:SOX2:SOX21:SOX3:SOX30:SOX4:SOX5:SOX6:SOX7:SOX8:SOX9:SRY	AAACAATGAYATTGTTT	1	-1.294	1	1	0.0002	2.2	0.0001
M03975_2.00:BBX:CIC	YAACAATADCATTGTTR	1	-1.294	1	1	0.0002	2.1	0.0001
M03983_2.00:SOX1:SOX10:SOX11:SOX12:SOX13:SOX14:SOX15:SOX17:SOX18:SOX2:SOX21:SOX3:SOX30:SOX4:SOX5:SOX6:SOX7:SOX8:SOX9:SRY	RAACAATWNCAKTGTTY	1	-1.294	1	1	0.0002	2.7	0.0001
M04249_2.00:BACH1:BACH2	AAANCATGASTCATSVTTT	1	-1.294	1	1	0.0002	2.3	0.0001
M04820_2.00:FOXA1:FOXA2:FOXA3:FOXB1	YTAAGCAAATATTTACWTAR	1	-1.294	1	1	0.0002	2.9	0.0001
M05150_2.00:NKX2-1:NKX2-2:NKX2-3:NKX2-4:NKX2-5:NKX2-6:NKX2-8	GCARTAACGACATC	1	-1.294	1	1	0.0002	2.1	0.0001
M05417_2.00:PAX3:PAX7	YCGTCACGSTTATTAD	1	-1.294	1	1	0.0002	2.3	0.0001
M08356_2.00:ZFP82	AGAATTAGTGAACTGGAAGAT	1	-1.294	1	1	0.0002	2.3	0.0001
M08930_2.00:ZFP82	TTCCAKTTCACTAATTYTCTCTTC	1	-1.294	1	1	0.0002	2.3	0.0001
M06373_2.00:BARHL1:BARHL2:HOXA6:HOXB6:HOXB8:HOXC6:HOXC8:HOXD8:NKX1-1:NKX1-2	TTTAATTG	1	-1.286	1	2047	0.3541	12646.3	0.3503
M01906_2.00:FBXL19:KDM2A:KDM2B	CGTACGTA	1	-1.285	1	68	0.0118	393.2	0.0109
M07934_2.00:ZNF274	GGTTTCTCTCCAGTA	1	-1.284	1	9	0.0016	44.3	0.0012
M03390_2.00:AR:NR3C1:NR3C2:PGR	RGGWACACSGTGTWCCY	1	-1.277	1	5	0.0009	22.5	0.0006
M09851_2.00:MYC	KACCACGTGGYC	1	-1.274	1	32	0.0055	178.2	0.0049
M00044_2.00:FOXP3	NRTAAACAA	1	-1.273	1	2427	0.4198	15017.2	0.416
M05582_2.00:NR1D1:NR1D2:NR2C1:NR2C2:NR2F1:NR2F2:NR2F6:NR4A1:NR4A2:NR4A3:NR5A2:NR6A1:PPARA:PPARD:PPARG:RARA:RARB:RARG:RORA:RORB:RORC:RXRA:RXRB:RXRG:THRA:THRB	ARAGGTCATGACCTYT	1	-1.272	1	7	0.0012	33.6	0.0009
M07628_2.00:ZNF440	AGTKGTTCTGCTTYW	1	-1.269	1	34	0.0059	190.7	0.0053
M08189_2.00:NFE2:NFE2L1:NFE2L2:NFE2L3	TGACTCGGCA	1	-1.265	1	161	0.0278	959.5	0.0266
M02768_2.00:TFAP2A:TFAP2B:TFAP2C:TFAP2D:TFAP2E	TGCCYBRGGGCA	1	-1.262	1	194	0.0336	1161.4	0.0322
M09280_2.00:HNF4A:HNF4G:NR1H4:NR2C1:NR2C2:NR2F1:NR2F2:NR2F6:NR4A1:NR4A2:NR4A3:NR5A1:NR5A2:NR6A1:PPARA:PPARD:PPARG:RARA:RARB:RARG:RORA:RORB:RORC:RXRA:RXRB:RXRG:THRA:THRB	GGTCAAAGGTCAH	1	-1.261	1	18	0.0031	96.6	0.0027
M07701_2.00:ZNF765	CCTGGGCYASGCMCTGSC	1	-1.252	1	14	0.0024	73.1	0.002
M09409_2.00:SOX1:SOX10:SOX11:SOX12:SOX13:SOX14:SOX15:SOX17:SOX18:SOX2:SOX21:SOX3:SOX30:SOX4:SOX5:SOX6:SOX7:SOX8:SOX9:SRY	TTTGCATDACAAWGGA	1	-1.246	1	20	0.0035	108.7	0.003
M03449_2.00:NFATC1:NFATC2:NFATC3:NFATC4	WKGRAAAATWWKTTTCCATT	1	-1.235	1	4	0.0007	17.4	0.0005
M04596_2.00:ZBTB2	GTTTCCGGTAAT	1	-1.235	1	4	0.0007	17.6	0.0005
M09976_2.00:BACH1:BACH2	GCTGAGTCAYGST	1	-1.232	1	35	0.0061	197	0.0055
M08903_2.00:ZNF394	MTTCCWTTCNATTCCATTYN	1	-1.225	1	52	0.009	299.5	0.0083
M05320_2.00:IRX1:IRX3:IRX6	TACGTGWWWWWWCGCGTW	1	-1.223	1	6	0.001	28.4	0.0008
M07757_2.00:ZNF783	CSGCGKCC	1	-1.223	1	188	0.0325	1127.4	0.0312
M02843_2.00:CREB3L1:CREB3L2	TGCCACGTGGCA	1	-1.221	1	12	0.0021	62.7	0.0017
M09495_2.00:BATF:BATF3	ATGASTCATH	1	-1.218	1	378	0.0654	2296.6	0.0636
M04750_2.00:ELF1:ELF2:ELF4:SPDEF	NAMCCGGATGTD	1	-1.216	1	101	0.0175	596.9	0.0165
M08392_2.00:ZNF134	CWTCACCTGMTGAGG	1	-1.208	1	29	0.005	162.2	0.0045
M08345_2.00:GLIS1	CBCYSCGGGRGGCC	1	-1.207	1	272	0.0471	1644.5	0.0456
M11164_2.00:AR:NR3C1:NR3C2:PGR	AGWACATKWTGTTCT	1	-1.205	1	19	0.0033	103.9	0.0029
M09465_2.00:TCF12:TCF3:TCF4	ASWTCAAAGG	1	-1.203	1	321	0.0555	1946.9	0.0539
M03457_2.00:RFX1:RFX2:RFX3:RFX4:RFX6	CGTTGCTAGGCAACG	1	-1.197	1	3	0.0005	12.3	0.0003
M04493_2.00:ZIC1:ZIC2:ZIC3:ZIC4:ZIC5	GACCCCCCGCTGYGC	1	-1.197	1	3	0.0005	12.6	0.0003
M04641_2.00:ZNF580	CCTACCCTHCNMCTACCCT	1	-1.197	1	3	0.0005	12.9	0.0004
M05728_2.00:RFX5:RFX7	DTRGCAACSGTTGCCGN	1	-1.197	1	3	0.0005	12.9	0.0004
M04143_2.00:FERD3L	GTAACATATGKTGC	1	-1.19	1	10	0.0017	51.5	0.0014
M08712_2.00:TFAP4	VAWCAGCTGG	1	-1.186	1	660	0.1142	4043.4	0.112
M06015_2.00:NRL	GCTDMGTCAGCA	1	-1.184	1	81	0.014	476.3	0.0132
M09655_2.00:NRF1	GCGCATGCGCAG	1	-1.18	1	25	0.0043	139.7	0.0039
M05744_2.00:SMAD1:SMAD5	CGTCTAGACR	1	-1.177	1	16	0.0028	86.5	0.0024
M10447_2.00:E2F1:E2F2:E2F3:E2F4:E2F5:E2F6	CGAAACGT	1	-1.177	1	1786	0.3089	11041.9	0.3058
M05604_2.00:NR2C1:NR2C2:NR2F1:NR2F2:NR2F6:NR4A1:NR4A2:NR4A3:PPARD:PPARG:RARA:RARB:RARG:RORA:RORB:RORC:RXRA:RXRB:RXRG	KAAAGGTCAN	1	-1.177	1	418	0.0723	2547.8	0.0706
M04617_2.00:MTF1	NRNGCCGTGTGCAAAAV	1	-1.176	1	2	0.0003	7.4	0.0002
M04783_2.00:EHF:ELF1:ELF2:ELF3:ELF4:ELF5:ETV6:ETV7	ACCCGGAAGTAVNNNNNHWAAAW	1	-1.176	1	2	0.0003	7.1	0.0002
M08929_2.00:ZNF816	CCCTGCATGTCCCCCTTYTTT	1	-1.176	1	2	0.0003	7.6	0.0002
M09337_2.00:TP53	RGRCATGYCCAGACATGYCC	1	-1.176	1	2	0.0003	7.3	0.0002
M08887_2.00:ZNF436	CCTCCTCCAGGAAGCCYTCCCTGA	1	-1.173	1	5	0.0009	23.6	0.0007
M11140_2.00:NR1D2:NR2C1:NR2C2:NR2F1:NR2F2:NR2F6:NR4A1:PPARA:PPARD:PPARG:RARA:RARB:RARG:RORA:RORB:RORC:RXRA:RXRB:RXRG:THRA	AACTAGGKCAAAGGTCA	1	-1.173	1	5	0.0009	23.9	0.0007
M02734_2.00:ELF1:ELF2:ELF4:ELK1:ELK3:ELK4:ERF:ERG:ETS1:ETS2:ETV1:ETV2:ETV3:ETV3L:ETV4:ETV5:FEV:FLI1:GABPA	CGGATATCCG	1	-1.173	1	28	0.0048	157.6	0.0044
M04230_2.00:ATF1:CREB1:CREM	BRTGACATCACN	1	-1.172	1	212	0.0367	1279	0.0354
M04096_2.00:CCDC169-SOHLH2:SOHLH2	YGCACGTGCN	1	-1.168	1	196	0.0339	1180.2	0.0327
M09828_2.00:MXI1	CBGTYGCCATGGCAA	1	-1.161	1	12	0.0021	63.9	0.0018
M07610_2.00:PRDM9	CYTTYTDYBBCCCCCSTSSCCMCC	1	-1.159	1	19	0.0033	104.1	0.0029
M09959_2.00:NFE2:NFE2L1:NFE2L2:NFE2L3	TGCTGAGTCAY	1	-1.159	1	101	0.0175	599.2	0.0166
M09630_2.00:RUNX1:RUNX2:RUNX3	NWAACCACADNN	1	-1.158	1	1368	0.2366	8443.2	0.2339
M07943_2.00:E2F1:E2F2:E2F3:E2F4:E2F5:E2F6	GGCGGGAAAWBBVRR	1	-1.156	1	61	0.0106	356.4	0.0099
M09151_2.00:NKX6-1:NKX6-2:NKX6-3	GATTAATGRSHWWTTAATK	1	-1.155	1	20	0.0035	110.9	0.0031
M08361_2.00:ZSCAN22	CNGCCTCCKCCMTCDGAC	1	-1.15	1	13	0.0022	69.8	0.0019
M04330_2.00:JUN:JUNB:JUND	BATGASTCATS	1	-1.145	1	70	0.0121	411.7	0.0114
M02834_2.00:ATF4	GGATGAYGCAATA	1	-1.145	1	23	0.004	128	0.0035
M03055_2.00:FOXC2:FOXD1:FOXD2:FOXD3:FOXG1:FOXI1:FOXI2:FOXI3:FOXJ2:FOXJ3:FOXK1:FOXK2:FOXP1:FOXP3:FOXP4	ACGGACACAAT	1	-1.14	1	9	0.0016	46.4	0.0013
M08932_2.00:ZNF467	CCCCCCCCCCCYYCCCCTCCCC	1	-1.139	1	79	0.0137	467	0.0129
M05849_2.00:ZNF282	CMTCCCACACC	1	-1.137	1	492	0.0851	3009.8	0.0834
M04117_2.00:MYF5:MYOD1:MYOG	CAACAGCTGWCG	1	-1.136	1	89	0.0154	527.7	0.0146
M08360_2.00:ZNF708	NRGCTGTACCTMCYTBYKNNN	1	-1.134	1	15	0.0026	81	0.0022
M02919_2.00:ZSCAN4	TGCACACACTGAAAA	1	-1.134	1	6	0.001	29.3	0.0008
M04494_2.00:ZIC1:ZIC2:ZIC3:ZIC4:ZIC5	GACCCCCTGCTGTGC	1	-1.134	1	6	0.001	29.2	0.0008
M07839_2.00:MAFF	TGCTGACTCAGCAAW	1	-1.134	1	6	0.001	29.8	0.0008
M07951_2.00:ELF1:ELF2:ELF4:ELK1:ELK3:ELK4:ERF:ERG:ETS1:ETS2:ETV1:ETV2:ETV3:ETV3L:ETV4:ETV5:FEV:FLI1:GABPA	CMTGCTGGGARTTGTAGTYCY	1	-1.134	1	6	0.001	29.6	0.0008
M10892_2.00:IRF1:IRF2	GAAAAGYGAAASC	1	-1.134	1	6	0.001	29.4	0.0008
M04786_2.00:EHF:ELF1:ELF2:ELF3:ELF4:ELF5:ETV6:ETV7	BWTRCGGAAGCV	1	-1.134	1	31	0.0054	176.1	0.0049
M04467_2.00:ZNF740	CYGCCCCCCCCAC	1	-1.133	1	36	0.0062	206.9	0.0057
M01302_2.00:PAX1:PAX2:PAX3:PAX5:PAX6:PAX8:PAX9	SRWSCGTGAC	1	-1.132	1	695	0.1202	4267.9	0.1182
M05852_2.00:ZSCAN4	GCACACACTGNMA	1	-1.131	1	351	0.0607	2139	0.0592
M04067_2.00:TFAP4	AWCAGCTGWT	1	-1.128	1	297	0.0514	1805.5	0.05
M10161_2.00:MAZ	GGGGGAGGGGAGGG	1	-1.126	1	354	0.0612	2157.9	0.0598
M03547_2.00:EOMES:TBR1:TBX21	RAGGTGTGAA	1	-1.123	1	276	0.0477	1676.9	0.0464
M02865_2.00:ATF4	AGGATGATGCAATM	1	-1.12	1	4	0.0007	18.4	0.0005
M08902_2.00:ZIC1:ZIC2:ZIC3:ZIC4:ZIC5	GGCYYCCTGCTGWGH	1	-1.117	1	99	0.0171	589.8	0.0163
M09013_2.00:ZIC1:ZIC2:ZIC3:ZIC4:ZIC5	GGCYYCCTGCTGWGH	1	-1.117	1	99	0.0171	589.8	0.0163
M02779_2.00:MLX	ATCACGTGAT	1	-1.117	1	51	0.0088	297.9	0.0083
M10263_2.00:SP1:SP3:SP4:SP5:SP6:SP8:SP9	GGGGCGGGGCSG	1	-1.116	1	447	0.0773	2733.6	0.0757
M05866_2.00:FOXP1:FOXP2:FOXP3:FOXP4	GTAAACAANW	1	-1.114	1	1591	0.2752	9839.1	0.2725
M08013_2.00:STAT1	YCCMTTTCCYGGAAAHCHCNB	1	-1.113	1	11	0.0019	58.9	0.0016
M04328_2.00:FOS:FOSB:FOSL1:FOSL2	GATGACRTCATC	1	-1.11	1	45	0.0078	261.4	0.0072
M03427_2.00:HNF4A:HNF4G:NR2E1	AAAAGTCAA	1	-1.109	1	563	0.0974	3452.4	0.0956
M09362_2.00:RFX1:RFX2:RFX3:RFX4:RFX6	CKGTTGCCATGGCAACVG	1	-1.107	1	7	0.0012	35.2	0.001
M04224_2.00:OLIG2:OLIG3	AMCATATGGT	1	-1.105	1	102	0.0176	609	0.0169
M10867_2.00:HSF1:HSF2:HSF4	MTTCTRGAAVYTTCTCM	1	-1.103	1	12	0.0021	64	0.0018
M04229_2.00:ATF1:CREB1:CREM	SRTGACGTCABN	1	-1.103	1	71	0.0123	420	0.0116
M02258_2.00:IRF9	ADCGAAACY	1	-1.101	1	1056	0.1827	6513.4	0.1804
M09043_2.00:E2F1:E2F2:E2F3:E2F4:E2F5:E2F6	NGGGCGGGAAGG	1	-1.101	1	345	0.0597	2104.2	0.0583
M05757_2.00:LEF1:TCF7:TCF7L1:TCF7L2	ACATCAAAG	1	-1.097	1	441	0.0763	2698.3	0.0747
M03217_2.00:ALX1:ALX3:ALX4:ARX:BARX1:BARX2:BSX:DLX1:DLX2:DLX3:DLX4:DLX5:DLX6:DRGX:EMX1:EMX2:EN1:EN2:ESX1:EVX1:EVX2:GBX1:GBX2:GSX1:GSX2:HESX1:HOXA1:HOXA2:HOXA3:HOXB1:HOXB2:HOXB3:HOXD3:ISX:LBX1:LBX2:LHX1:LHX2:LHX3:LHX4:LHX5:LHX6:LHX8:LHX9:LMX1A:LMX1B:MEOX1:MIXL1:MNX1:MSX1:MSX2:NKX1-1:NKX1-2:NOBOX:NOTO:OTP:PDX1:PHOX2A:PHOX2B:PROP1:PRRX1:PRRX2:RAX:RAX2:SEBOX:SHOX:SHOX2:UNCX:VAX1:VAX2:VSX1:VSX2:ZFHX2:…	TAATTRRATTA	1	-1.097	1	256	0.0443	1555	0.0431
M10945_2.00:BORCS8-MEF2B:MEF2A:MEF2B:MEF2C:MEF2D	DDKCTATTTTTRGM	1	-1.095	1	186	0.0322	1124.1	0.0311
M02764_2.00:TFAP2A:TFAP2B:TFAP2C:TFAP2D:TFAP2E	TGCCCYBVGGGCA	1	-1.091	1	241	0.0417	1463.8	0.0405
M03041_2.00:FOXO4	TTTCCCCACACG	1	-1.09	1	50	0.0086	292.3	0.0081
M03585_2.00:TFAP2A:TFAP2B:TFAP2E	TGCCCBVGGGCA	1	-1.089	1	240	0.0415	1457.2	0.0404
M03084_2.00:CRX:DMBX1:DPRX:GSC:GSC2:OTX1:OTX2:PITX1:PITX2:PITX3:TPRX1	TTAATCCC	1	-1.087	1	1586	0.2743	9813.8	0.2718
M00473_2.00:HOXA13:HOXB13:HOXC13:HOXD13	WTTTAYDRG	1	-1.083	1	2705	0.4679	16791.9	0.4651
M06870_2.00:E2F1:E2F2:E2F3:E2F4:E2F5:E2F6	ATWWTGGCGCCAAAA	1	-1.077	1	5	0.0009	24.7	0.0007
M07677_2.00:ZNF566	SCCCGCCTCCCTTSCCGCYBC	1	-1.077	1	5	0.0009	24.3	0.0007
M10291_2.00:WT1	CGCCCCCGCS	1	-1.072	1	488	0.0844	2992.7	0.0829
M04082_2.00:MLX	HGCACGTGMYM	1	-1.071	1	350	0.0605	2138.1	0.0592
M10166_2.00:SP1:SP3:SP4:SP8:SP9	GCCCCGCCCCS	1	-1.07	1	461	0.0797	2825.5	0.0783
M03447_2.00:NFAT5	YTGTAATTTTCCAY	1	-1.07	1	20	0.0035	112.2	0.0031
M10861_2.00:HSF1:HSF2:HSF4	GGGAATCTTCTRGRRG	1	-1.068	1	32	0.0055	184.8	0.0051
M08184_2.00:BACH1:BACH2	GTCACGTG	1	-1.058	1	707	0.1223	4352.9	0.1206
M05134_2.00:CRX:DMBX1:DPRX:GSC:GSC2:OTX1:OTX2:PITX1:PITX2:PITX3:TPRX1	HTAATCCS	1	-1.056	1	1502	0.2598	9296.8	0.2575
M05966_2.00:NHLH1:NHLH2	GGCMYCAGCTGCGYY	1	-1.055	1	11	0.0019	59.2	0.0016
M08816_2.00:NFE2:NFE2L1:NFE2L2:NFE2L3	ATGACTCAGCARWW	1	-1.049	1	66	0.0114	391.9	0.0109
M10883_2.00:IRF3	TBMBTTTCSCTTT	1	-1.049	1	433	0.0749	2654.7	0.0735
M10403_2.00:NFYA	YTCTGATTGGCYRR	1	-1.043	1	63	0.0109	373.8	0.0104
M08717_2.00:MYF5:MYF6:MYOG	CASCTGC	1	-1.042	1	1760	0.3044	10906.7	0.3021
M08767_2.00:MYF5:MYF6:MYOG	CASCTGC	1	-1.042	1	1760	0.3044	10906.7	0.3021
M02893_2.00:ZIC1:ZIC2:ZIC3:ZIC4:ZIC5	GACCCCCCGCTGTG	1	-1.033	1	7	0.0012	36.1	0.001
M08037_2.00:TP63:TP73	GCATGTCCMGRCATG	1	-1.032	1	85	0.0147	508.9	0.0141
M04316_2.00:CREB3L1:CREB3L2	TGCCACGTGGCA	1	-1.03	1	19	0.0033	107.9	0.003
M07763_2.00:ZNF705G	AGAGGTTTCTT	1	-1.028	1	66	0.0114	392.7	0.0109
M03083_2.00:CRX:DMBX1:DPRX:GSC:GSC2:OTX1:OTX2:PITX1:PITX2:PITX3:TPRX1	NTTAATCCH	1	-1.025	1	1523	0.2634	9433.6	0.2613
M03648_2.00:ATF3:FOSB:JDP2	SRTGACGTCAYS	1	-1.022	1	81	0.014	484.7	0.0134
M08129_2.00:GRHL1:GRHL2	NNAAACTGGTTTKNC	1	-1.022	1	41	0.0071	240.2	0.0067
M04887_2.00:GRHL1	AAACCGGTTT	1	-1.021	1	72	0.0125	429.2	0.0119
M04636_2.00:ZBTB12	GCGACGKCAGGCCA	1	-1.02	1	8	0.0014	42.8	0.0012
M09757_2.00:TFAP2A:TFAP2B:TFAP2C:TFAP2D:TFAP2E	ABCGCCTSAGGCGVT	1	-1.02	1	8	0.0014	42.7	0.0012
M08254_2.00:ZNF621	CTKCCCTGGGAYTTT	1	-1.02	1	40	0.0069	234.4	0.0065
M04468_2.00:ZNF740	CYGCCCCCCCCAC	1	-1.017	1	51	0.0088	301.3	0.0083
M07747_2.00:ZNF808	WGGTCTVYAAAGKRCCYKBTT	1	-1.015	1	4	0.0007	19	0.0005
M08240_2.00:ZNF684	ACAGTCCACCCCTT	1	-1.015	1	4	0.0007	19.6	0.0005
M03262_2.00:MEIS1:MEIS2:MEIS3:PKNOX1:PKNOX2:TGIF1:TGIF2	TGACAGGTGTCA	1	-1.012	1	49	0.0085	290	0.008
M04346_2.00:MAF:MAFA:MAFB:MAFG:MAFK:NRL	DTGCTGASTCAGCAH	1	-1.011	1	9	0.0016	48.5	0.0013
M04592_2.00:ZNF771	NGCGCTAACCACTGM	1	-1.011	1	9	0.0016	48.1	0.0013
M09326_2.00:AR:NR3C1:NR3C2:PGR	RGAACABTCTGTTCY	1	-1.01	1	48	0.0083	283.5	0.0079
M08391_2.00:ZBTB48	ACGGTCCCTAR	1	-1.009	1	635	0.1098	3912	0.1084
M05846_2.00:CTCF	CSCNMYAGCGCCCCCTW	1	-1.009	1	34	0.0059	198.2	0.0055
M04198_2.00:BHLHA15	ACCATATGGT	1	-1.007	1	233	0.0403	1422	0.0394
M10165_2.00:SP1:SP3:SP4:SP8:SP9	SCCCCKCCCCCGS	1	-1.007	1	309	0.0535	1891.5	0.0524
M05192_2.00:PKNOX1:PKNOX2:TGIF1:TGIF2:TGIF2LX:TGIF2LY	TGACAGCTGTCA	1	-1.005	1	32	0.0055	186.5	0.0052
M10479_2.00:ELF1:ELF2:ELF4:ELK1:ELK3:ELK4:ERF:ERG:ETS1:ETS2:ETV1:ETV2:ETV3:ETV3L:ETV4:ETV5:FEV:FLI1:GABPA	CTTCCTGT	1	-1.004	1	1765	0.3053	10945.9	0.3032
M03982_2.00:SOX1:SOX10:SOX11:SOX12:SOX13:SOX14:SOX15:SOX17:SOX18:SOX2:SOX21:SOX3:SOX30:SOX4:SOX5:SOX6:SOX7:SOX8:SOX9:SRY	NAACAATAACATTGTTN	1	-1.004	1	2	0.0003	8.9	0.0002
M04712_2.00:EHF:ELF1:ELF2:ELF3:ELF4:ELF5:ETV6:ETV7:SPIC	SCGGAAGTACTTCCGS	1	-1.004	1	2	0.0003	8.3	0.0002
M05425_2.00:PAX3:PAX7	CRATTAGTCACGCTW	1	-1.004	1	2	0.0003	8.4	0.0002
M08381_2.00:ZNF675	ACATTTTGTCCTCCTRRBCCY	1	-1.004	1	2	0.0003	8.1	0.0002
M11348_2.00:STAT1	KDYSAHTTCCGGGAADTGGSR	1	-1.004	1	2	0.0003	8	0.0002
M10621_2.00:GTF2I	VAGGAAGTGA	1	-0.9988	1	1635	0.2828	10136.3	0.2808
M05231_2.00:CRX:DMBX1:DPRX:GSC:GSC2:OTX1:OTX2:PITX1:PITX2:PITX3:TPRX1	NTAATCCC	1	-0.9973	1	1416	0.2449	8772.6	0.243
M04488_2.00:ZIC1:ZIC2:ZIC3:ZIC4:ZIC5	KACCCCCTGCTGTGM	1	-0.9961	1	12	0.0021	66.3	0.0018
M08892_2.00:ZNF341	GCTCTTCCCYCCCCYCCCCCCC	1	-0.9921	1	23	0.004	132.2	0.0037
M03456_2.00:RFX1:RFX2:RFX3:RFX4:RFX6	SGTTGCCATGGCAACS	1	-0.9915	1	14	0.0024	78.6	0.0022
M04510_2.00:ZNF281	GCCCCTCCCCCG	1	-0.9905	1	263	0.0455	1608.6	0.0446
M02929_2.00:SCRT1:SCRT2	RWGCAACAGGTGGBT	1	-0.9902	1	15	0.0026	84.8	0.0023
M03411_2.00:HNF4G:NR1H4:NR2C1:NR2C2:NR2F1:NR2F2:NR2F6:NR4A1:NR4A2:NR4A3:NR5A1:NR5A2:NR6A1:PPARA:PPARD:PPARG:RARA:RARB:RARG:RORA:RORB:RORC:RXRA:RXRB:RXRG:THRA:THRB	GRGGTCATGACCYC	1	-0.9894	1	5	0.0009	25.2	0.0007
M03610_2.00:NHLH1:NHLH2	RGCAYCAGCTGRTGCC	1	-0.9894	1	16	0.0028	90.7	0.0025
M02973_2.00:ELF1:ELF2:ELF4:SPDEF	AMCCGGATGTA	1	-0.9892	1	19	0.0033	108.6	0.003
M04019_2.00:ATF6:ATF6B	TAGTCACGTGK	1	-0.9892	1	19	0.0033	109	0.003
M02912_2.00:ZIC1:ZIC2:ZIC3:ZIC4	GACCCCCCGCTGYGH	1	-0.989	1	17	0.0029	96.1	0.0027
M08197_2.00:E2F1:E2F2:E2F3:E2F4:E2F5:E2F6	SGCGCGAAAW	1	-0.9783	1	71	0.0123	425.6	0.0118
M10276_2.00:ZBTB7A	AGGGGGCGC	1	-0.9766	1	99	0.0171	597.8	0.0166
M10611_2.00:TFCP2:UBP1	GCTGGKTYGVGCTGG	1	-0.9757	1	70	0.0121	419.7	0.0116
M05208_2.00:MEIS1:MEIS2:MEIS3:PKNOX1:PKNOX2:TGIF1:TGIF2:TGIF2LX:TGIF2LY	TGACAGCTGTCA	1	-0.9736	1	6	0.001	31.5	0.0009
M07785_2.00:USF2	GGTCACGTGRCSSGS	1	-0.9727	1	31	0.0054	182	0.005
M09090_2.00:FOXA1:FOXA2:FOXA3:FOXB1	SCWAAGTAAACA	1	-0.9702	1	366	0.0633	2248.7	0.0623
M04286_2.00:ATF3:JDP2	SRTGACGTCAYS	1	-0.9652	1	58	0.01	346.8	0.0096
M02946_2.00:CUX1:CUX2	ATCGATAMNTRATCGAT	1	-0.9637	1	1	0.0002	3.4	0.0001
M03425_2.00:ESR1:ESR2:NR1D1:NR1D2:NR1H2:NR1H3:NR1H4:NR2C1:NR2C2:NR2F1:NR2F2:NR2F6:NR4A1:NR5A2:NR6A1:PPARA:PPARD:PPARG:RARA:RARB:RARG:RORA:RORB:RORC:RXRA:RXRB:RXRG	AGGTCAHMYAAAGGTCA	1	-0.9637	1	1	0.0002	3.4	0.0001
M03495_2.00:SOX1:SOX10:SOX11:SOX12:SOX13:SOX14:SOX15:SOX17:SOX18:SOX2:SOX21:SOX3:SOX30:SOX4:SOX5:SOX6:SOX7:SOX8:SOX9:SRY	TGAATGTTCAGTCA	1	-0.9637	1	1	0.0002	3.3	0.0001
M03540_2.00:SOX1:SOX10:SOX11:SOX12:SOX13:SOX14:SOX15:SOX17:SOX18:SOX2:SOX21:SOX3:SOX30:SOX4:SOX5:SOX6:SOX7:SOX8:SOX9:SRY	KATGAATGSYATTCATR	1	-0.9637	1	1	0.0002	3.9	0.0001
M03792_2.00:ALX1:ALX3:ALX4:ARX:BARHL1:BARHL2:BARX1:BARX2:BSX:DRGX:EMX1:EMX2:EN1:EN2:ESX1:EVX1:EVX2:GBX1:GBX2:GSX1:GSX2:HESX1:HMX1:HMX2:HMX3:HOXA1:HOXA2:HOXA3:HOXA4:HOXA5:HOXB1:HOXB2:HOXB3:HOXB4:HOXB5:HOXC4:HOXC5:HOXD3:HOXD4:LHX2:LHX3:LHX4:LHX9:MEOX1:MEOX2:MIXL1:MNX1:MSX1:MSX2:NKX1-1:NKX1-2:NOTO:OTP:PDX1:PHOX2A:PHOX2B:PROP1:PRRX1:PRRX2:RAX:RAX2:SEBOX:SHOX:SHOX2:TLX1:TLX2:TLX3:UNCX:VAX1:VAX2:VENTX:…	STAATTAGCGCTAATKRS	1	-0.9637	1	1	0.0002	3.9	0.0001
M03989_2.00:TBX1	TAACACCTAGGTGTGA	1	-0.9637	1	1	0.0002	3.1	0.0001
M04573_2.00:ZNF454	TRGCGCCWGGCGCYA	1	-0.9637	1	1	0.0002	3.6	0.0001
M04631_2.00:ZBTB14	TCACGTGCACGCGCAY	1	-0.9637	1	1	0.0002	3.4	0.0001
M04663_2.00:LIN28A:LIN28B	CGCGATATRACAGCG	1	-0.9637	1	1	0.0002	3.5	0.0001
M04664_2.00:LIN28A:LIN28B	CGCGATATAACAGCG	1	-0.9637	1	1	0.0002	3.5	0.0001
M05513_2.00:HSF5:HSFX1:HSFX2:HSFY1:HSFY2	WWTRGAATGTTTRGAATGY	1	-0.9637	1	1	0.0002	3.1	0.0001
M05760_2.00:SOX1:SOX10:SOX11:SOX12:SOX13:SOX14:SOX15:SOX17:SOX18:SOX2:SOX21:SOX3:SOX30:SOX4:SOX5:SOX6:SOX7:SOX8:SOX9:SRY	AACAATGGSCCATTGTT	1	-0.9637	1	1	0.0002	3.2	0.0001
M07681_2.00:ZNF17	GATCYKVDNGTGCCTGYTCMKGHNAGNVNB	1	-0.9637	1	1	0.0002	3.8	0.0001
M08309_2.00:ZNF331	RAAAACCNCCCTGCWGAGCCCWGCCYN	1	-0.9637	1	1	0.0002	3.8	0.0001
M08891_2.00:ZNF331	CCACCCAGCTGAGCCCAGCC	1	-0.9637	1	1	0.0002	3.1	0.0001
M08912_2.00:ZNF528	TCAGAAATGGCTTCCCTGGG	1	-0.9637	1	1	0.0002	3.1	0.0001
M11204_2.00:PAX1:PAX2:PAX3:PAX5:PAX6:PAX7:PAX8:PAX9	GAKACGCAGCGAKGMGTGRCCACC	1	-0.9637	1	1	0.0002	3.4	0.0001
M03609_2.00:NHLH1:NHLH2	GGRCGCAGCTGCGYCC	1	-0.9633	1	7	0.0012	37.5	0.001
M08994_2.00:EGR1:EGR2:EGR3:EGR4	CCCCCRCCCACRCM	1	-0.9622	1	316	0.0547	1939.1	0.0537
M03060_2.00:FOXC1:FOXC2:FOXD1:FOXD2:FOXD3:FOXD4:FOXD4L1:FOXD4L3:FOXD4L4:FOXD4L5:FOXD4L6:FOXE1:FOXF1:FOXF2:FOXG1:FOXI1:FOXI3:FOXK2:FOXL1:FOXL2:FOXP4:FOXS1	ATAAACA	1	-0.9618	1	2217	0.3835	13773.6	0.3815
M03105_2.00:BARHL1:BARHL2:BARX1:BARX2:BSX:DLX2:DLX3:EMX1:EMX2:ESX1:EVX1:EVX2:GBX1:GBX2:HESX1:HMX1:HMX2:HMX3:HOXA1:HOXA2:HOXA3:HOXA4:HOXA5:HOXB1:HOXB2:HOXB3:HOXB4:HOXB5:HOXC4:HOXC5:HOXD1:HOXD12:HOXD3:HOXD4:LBX1:LBX2:MEOX1:MEOX2:MNX1:MSX1:MSX2:NANOG:NANOGP8:NKX1-1:NKX1-2:PDX1:RAX:RAX2:TLX1:TLX3:VENTX	TTAATGATGATKAS	1	-0.9585	1	24	0.0042	139.1	0.0039
M04258_2.00:ATF1:CREB1:CREM	SGTGACGTCAYS	1	-0.9582	1	37	0.0064	218.3	0.006
M04797_2.00:ELF1:ELF2:ELF4:ELK1:ELK3:ELK4:ERF:ERG:ETS1:ETS2:ETV1:ETV2:ETV3:ETV3L:ETV4:ETV5:FEV:FLI1:GABPA	STCGTAAATGCA	1	-0.9565	1	8	0.0014	43.4	0.0012
M07598_2.00:ZNF7	CWGACAATAVCAAGTGBTGRC	1	-0.9565	1	8	0.0014	43.4	0.0012
M08766_2.00:TWIST1:TWIST2	TAATKRAAACCAGATGT	1	-0.9565	1	8	0.0014	43.5	0.0012
M02805_2.00:FIGLA	AMCACCTGKT	1	-0.955	1	1431	0.2475	8874.3	0.2458
M02839_2.00:ATF3:JDP2	GRTGACGTCATC	1	-0.9519	1	9	0.0016	49.4	0.0014
M02915_2.00:EGR1:EGR2:EGR3:EGR4	YHACGCCCACGCAHT	1	-0.9519	1	9	0.0016	49.6	0.0014
M05316_2.00:IRX2:IRX4:IRX5	ACGYGTWNWACGCGT	1	-0.9515	1	20	0.0035	115.2	0.0032
M05791_2.00:SOX1:SOX10:SOX11:SOX12:SOX13:SOX14:SOX15:SOX17:SOX18:SOX2:SOX21:SOX3:SOX30:SOX4:SOX5:SOX6:SOX7:SOX8:SOX9:SRY	VACAATGC	1	-0.949	1	2830	0.4895	17602	0.4876
M10916_2.00:MEF2A	GCTAAATTTAGT	1	-0.9489	1	10	0.0017	55.8	0.0015
M09830_2.00:MYF5:MYF6:MYOD1:MYOG	RGCAGSTG	1	-0.9467	1	1954	0.338	12137	0.3362
M05247_2.00:MEIS1:MEIS2:MEIS3:PKNOX1:PKNOX2:TGIF1:TGIF2:TGIF2LX:TGIF2LY	TGACAGCTGTCA	1	-0.9465	1	16	0.0028	91.6	0.0025
M09262_2.00:MYB:MYBL1	BCBSCAACYGCCACY	1	-0.9462	1	51	0.0088	304.3	0.0084
M09472_2.00:LYL1:TAL1:TAL2	TTATCTSNNSNCNVCAGCYG	1	-0.9458	1	12	0.0021	67.9	0.0019
M03123_2.00:MEIS1:MEIS2:MEIS3:PKNOX1:PKNOX2:TGIF1:TGIF2:TGIF2LX:TGIF2LY	TGACAGCTGTCA	1	-0.9458	1	15	0.0026	85.5	0.0024
M10249_2.00:ZNF143:ZNF76	ACTTCCCAGAATGCCT	1	-0.9458	1	15	0.0026	85.3	0.0024
M04165_2.00:NHLH1:NHLH2	GGGBMGCAGCTGCGTCCC	1	-0.9455	1	3	0.0005	14.2	0.0004
M04707_2.00:E2F1:E2F2:E2F3:E2F4:E2F5:E2F6	WAATGGCGCCAAAA	1	-0.9455	1	3	0.0005	14.4	0.0004
M10314_2.00:ZNF628	CAAGGTTGGTTGC	1	-0.9455	1	3	0.0005	14.8	0.0004
M09621_2.00:TP53	NRRRCATGYCYRGRCATGYY	1	-0.9454	1	13	0.0022	73.5	0.002
M07754_2.00:ZNF468	CRCCCCCTCCCH	1	-0.9438	1	186	0.0322	1136	0.0315
M08996_2.00:EGR1:EGR2:EGR3:EGR4	CCCCGCCCMCGCMC	1	-0.94	1	151	0.0261	920.4	0.0255
M03563_2.00:EOMES:TBR1:TBX21:TBX5	AAGGTGTGAAAWN	1	-0.9398	1	116	0.0201	704.2	0.0195
M02727_2.00:MITF:TFEB	RTCACGTGAY	1	-0.9395	1	64	0.0111	384.1	0.0106
M03218_2.00:ALX1:ALX3:ALX4:ARX:BARX1:BARX2:BSX:DLX1:DLX2:DLX3:DLX4:DLX5:DLX6:DRGX:EN1:EN2:ESX1:GBX1:GBX2:GSX1:GSX2:HESX1:HOXA1:HOXA2:HOXA3:HOXA4:HOXA5:HOXB1:HOXB2:HOXB3:HOXB4:HOXB5:HOXC4:HOXC5:HOXD3:HOXD4:ISX:LBX2:LHX1:LHX2:LHX3:LHX4:LHX5:LHX6:LHX8:LHX9:LMX1A:LMX1B:MEOX1:MIXL1:MNX1:MSX1:MSX2:NKX1-1:NKX1-2:NOBOX:NOTO:OTP:PDX1:PHOX2A:PHOX2B:PROP1:PRRX1:PRRX2:RAX:RAX2:SEBOX:SHOX:SHOX2:UNCX:VAX1:VAX2…	YTAATTAGATTAR	1	-0.9376	1	29	0.005	170.6	0.0047
M05967_2.00:NEUROG2	TGACATVTGG	1	-0.9375	1	231	0.04	1415.4	0.0392
M04290_2.00:ATF3:JDP2	NRTGACGTCAYS	1	-0.9332	1	131	0.0227	797.8	0.0221
M04119_2.00:MYF5:MYOD1:MYOG	YRACAGCTGTCG	1	-0.9324	1	119	0.0206	723	0.02
[truncated: 5,705 more rows]

## Sheet: EBNA2 GM12878 ChIP-seq HOMER
Motif Name	Consensus	P-value	Log P-value	q-value (Benjamini)	# of Target Sequences with Motif(of 16951)	% of Target Sequences with Motif	# of Background Sequences with Motif(of 28153)	% of Background Sequences with Motif
M10710_2.00:MEIS1:MEIS2:MEIS3:PKNOX1:PKNOX2:TGIF1:TGIF2	ATGATTTATGRB	1e-1027	-2366	0	2024	0.1189	475.8	0.0164
M10463_2.00:EBF1	TCYCAGGGGAATTB	1e-969	-2233	0	2518	0.148	833.6	0.0287
M09767_2.00:ARID5A:ARID5B	AACCACAATACCAA	1e-957	-2205	0	2104	0.1236	569.1	0.0196
M03074_2.00:TFCP2:UBP1	RAACCGGTTT	1e-896	-2065	0	2121	0.1246	626.4	0.0216
M09789_2.00:MLXIPL	GTGCACGTGRSAC	1e-881	-2029	0	2464	0.1448	879.5	0.0303
M05652_2.00:ESR1:ESR2:NR1D1:NR1D2:NR1H2:NR1H3:NR1H4:NR2C1:NR2C2:NR2F1:NR2F2:NR2F6:NR4A1:NR4A2:NR4A3:NR5A2:NR6A1:PPARA:PPARD:PPARG:RARA:RARB:RARG:RORA:RORB:RORC:RXRA:RXRB:RXRG	AAGGTCACGACCTY	1e-856	-1973	0	1605	0.0943	348.9	0.012
M05650_2.00:ESR1:ESR2:NR1D1:NR1D2:NR1H2:NR1H3:NR1H4:NR2C1:NR2C2:NR2F1:NR2F2:NR2F6:NR4A1:NR4A2:NR4A3:NR5A2:NR6A1:PPARA:PPARD:PPARG:RARA:RARB:RARG:RORA:RORB:RORC:RXRA:RXRB:RXRG	AAGGTCATGACCTT	1e-843	-1942	0	1564	0.0919	334.4	0.0115
M09052_2.00:ELF1:ELF2:ELF4:ELK1:ELK3:ELK4:ERF:ERG:ETS1:ETS2:ETV1:ETV2:ETV3:ETV3L:ETV4:ETV5:FEV:FLI1:GABPA	RGRCAGGAAGTGG	1e-796	-1834	0	2686	0.1578	1149.7	0.0396
M05611_2.00:ESR1:ESR2:NR1D1:NR1D2:NR1H2:NR1H3:NR1H4:NR2C1:NR2C2:NR2F1:NR2F2:NR2F6:NR4A1:NR5A2:NR6A1:PPARA:PPARD:PPARG:RARA:RARB:RARG:RORA:RORB:RORC:RXRA:RXRB:RXRG	RAGGTCAYGACCTY	1e-796	-1834	0	1626	0.0955	396.4	0.0137
M05444_2.00:POU2F2	KCATTABSATAATGV	1e-791	-1821	0	2151	0.1264	740.9	0.0255
M09574_2.00:HOXA10:HOXA11:HOXA5:HOXA6:HOXA7:HOXA9:HOXB5:HOXB6:HOXB8:HOXB9:HOXC10:HOXC11:HOXC5:HOXC6:HOXC8:HOXC9:HOXD10:HOXD11:HOXD8:HOXD9	TGATTTATGGCC	1e-769	-1773	0	1401	0.0823	290	0.01
M05608_2.00:ESR1:ESR2:NR1D1:NR1D2:NR1H2:NR1H3:NR1H4:NR2C1:NR2C2:NR2F1:NR2F2:NR2F6:NR4A1:NR5A2:NR6A1:PPARA:PPARD:PPARG:RARA:RARB:RARG:RORA:RORB:RORC:RXRA:RXRB:RXRG	RAGGTCAYGACCTY	1e-730	-1681	0	1648	0.0968	455.7	0.0157
M04802_2.00:ELF1:ELF2:ELF4:ELK1:ELK3:ELK4:ERF:ERG:ETS1:ETS2:ETV1:ETV2:ETV3:ETV3L:ETV4:ETV5:FEV:FLI1:GABPA	GACCGGAAGTR	1e-705	-1624	0	3788	0.2226	2345.2	0.0809
M10329_2.00:ZNF718	GTTAAGGARA	1e-693	-1598	0	2526	0.1484	1149.2	0.0396
M05597_2.00:NR1D2:NR1H2:NR1H3:NR1H4:NR2C1:NR2C2:NR2F1:NR2F2:NR2F6:NR4A1:NR4A2:NR4A3:NR5A2:NR6A1:PPARA:PPARD:PPARG:RARA:RARB:RARG:RORA:RORB:RORC:RXRA:RXRB:RXRG	VRGGTCATGACCYB	1e-677	-1560	0	1675	0.0984	514.2	0.0177
M08137_2.00:HOXA10:HOXA11:HOXA5:HOXA6:HOXA7:HOXA9:HOXB5:HOXB6:HOXB8:HOXB9:HOXC10:HOXC11:HOXC5:HOXC6:HOXC8:HOXC9:HOXD10:HOXD11:HOXD8:HOXD9	RTGATTTATGGCC	1e-661	-1522	0	1480	0.087	403.7	0.0139
M08728_2.00:CLOCK	TSBKCACGTGKCTG	1e-653	-1504	0	2777	0.1632	1435.4	0.0495
M08760_2.00:CLOCK	TSBKCACGTGKCTG	1e-653	-1504	0	2777	0.1632	1435.4	0.0495
M09575_2.00:HOXA10:HOXA11:HOXA5:HOXA6:HOXA7:HOXA9:HOXB5:HOXB6:HOXB8:HOXB9:HOXC10:HOXC11:HOXC5:HOXC6:HOXC8:HOXC9:HOXD10:HOXD11:HOXD8:HOXD9	TGATTTATGGCC	1e-637	-1467	0	2047	0.1203	826.2	0.0285
M08913_2.00:ZNF146	TTTTCATGGCTGMATAGTATTCCA	1e-630	-1452	0	1834	0.1078	670.6	0.0231
M09532_2.00:ELF1:ELF2:ELF4:ELK1:ELK3:ELK4:ERF:ERG:ETS1:ETS2:ETV1:ETV2:ETV3:ETV3L:ETV4:ETV5:FEV:FLI1:GABPA	ACAGGAAGTG	1e-599	-1381	0	2667	0.1567	1421	0.049
M04144_2.00:MSGN1	NRMCATATGGYN	1e-599	-1380	0	4702	0.2763	3644.1	0.1257
M10752_2.00:PBX1:PBX2:PBX3:PBX4	RTGATTTATKGC	1e-597	-1377	0	2208	0.1297	1009.9	0.0348
M09174_2.00:ALX1:ALX3:ALX4:ARX:BARHL1:BARHL2:BARX1:BARX2:BSX:DRGX:EMX1:EMX2:EN1:EN2:ESX1:EVX1:EVX2:GBX1:GBX2:GSX1:GSX2:HESX1:HOXA1:HOXA2:HOXA3:HOXA4:HOXA5:HOXB1:HOXB2:HOXB3:HOXB4:HOXB5:HOXC4:HOXC5:HOXD1:HOXD3:HOXD4:LBX1:MEOX1:MEOX2:MIXL1:MNX1:MSX1:MSX2:NANOG:NANOGP8:NKX1-1:NKX1-2:PDX1:PHOX2A:PHOX2B:PROP1:PRRX1:PRRX2:RAX:RAX2:SHOX:SHOX2:TLX1:TLX3:UNCX:VAX1:VAX2:VENTX:VSX1:VSX2	TGATTTATGGCYT	1e-597	-1376	0	2043	0.12	871.5	0.0301
M08959_2.00:ZNF260	TTTWTATGGCTGCATAGTATTCCA	1e-595	-1372	0	1837	0.1079	710.9	0.0245
M05122_2.00:HOXA13:HOXB13:HOXC13:HOXD13	GTTTTATTGSS	1e-592	-1365	0	1954	0.1148	805.6	0.0278
M08138_2.00:HOXA10:HOXA11:HOXA5:HOXA6:HOXA7:HOXA9:HOXB5:HOXB6:HOXB8:HOXB9:HOXC10:HOXC11:HOXC5:HOXC6:HOXC8:HOXC9:HOXD10:HOXD11:HOXD8:HOXD9	TGATTTATGGC	1e-587	-1352	0	2114	0.1242	944.1	0.0326
M04145_2.00:MSGN1	NRMCATATGGYN	1e-575	-1326	0	5241	0.308	4387.1	0.1513
M04755_2.00:ELF1:ELF2:ELF4:ELK1:ELK3:ELK4:ERF:ERG:ETS1:ETS2:ETV1:ETV2:ETV3:ETV3L:ETV4:ETV5:FEV:FLI1:GABPA	NRSCGGAAGTR	1e-575	-1326	0	4894	0.2876	3950.7	0.1362
M01722_2.00:HEY1:HEY2:HEYL	GCACGTGTC	1e-561	-1292	0	3050	0.1792	1872.5	0.0646
M09197_2.00:CDX1:CDX2:CDX4	TGATTTATKGCY	1e-538	-1240	0	2128	0.125	1025.7	0.0354
M08725_2.00:ARNTL	RGTCACGTGGM	1e-528	-1217	0	3493	0.2053	2424	0.0836
M05350_2.00:POU6F1	NTAATGAGATGCDN	1e-521	-1201	0	2079	0.1222	1007.8	0.0348
M07781_2.00:ZNF8	AYGTACCACATT	1e-515	-1187	0	2091	0.1229	1027.8	0.0354
M04782_2.00:ELF1:ELF2:ELF4:ELK1:ELK3:ELK4:ERF:ERG:ETS1:ETS2:ETV1:ETV2:ETV3:ETV3L:ETV4:ETV5:FEV:FLI1:GABPA	NACCGGAAGYN	1e-514	-1184	0	5049	0.2967	4345.2	0.1498
M08329_2.00:ZNF146	GCTGYATARTATTCC	1e-505	-1163	0	1931	0.1135	903	0.0311
M09473_2.00:CLOCK	CACGTGDC	1e-500	-1152	0	3674	0.2159	2701.6	0.0932
M07756_2.00:ZFP57	GCGGCA	1e-463	-1066	0	1922	0.1129	957.6	0.033
M00273_2.00:CRX:DMBX1:DPRX:GSC:GSC2:OTX1:OTX2:PITX1:PITX2:PITX3:TPRX1	NAYTAATCCMN	1e-457	-1054	0	3407	0.2002	2508.1	0.0865
M06087_2.00:SCRT1:SCRT2	ACCACCTGTTGMA	1e-446	-1028	0	1040	0.0611	294.2	0.0101
M03085_2.00:HOXA10:HOXA11:HOXA5:HOXA6:HOXA7:HOXA9:HOXB5:HOXB6:HOXB8:HOXB9:HOXC10:HOXC11:HOXC5:HOXC6:HOXC8:HOXC9:HOXD10:HOXD11:HOXD8:HOXD9	NNTTTTACGACH	1e-444	-1024	0	3138	0.1844	2237.1	0.0771
M00562_2.00:CRX:DMBX1:DPRX:GSC:GSC2:OTX1:OTX2:PITX1:PITX2:PITX3:TPRX1	MTTAATCCCN	1e-444	-1022	0	3512	0.2064	2669.8	0.0921
M00311_2.00:CRX:DMBX1:DPRX:GSC:GSC2:OTX1:OTX2:PITX1:PITX2:PITX3:TPRX1	TTAATCCC	1e-438	-1011	0	3826	0.2248	3059.7	0.1055
M04800_2.00:ELF1:ELF2:ELF4:ELK1:ELK3:ELK4:ERF:ERG:ETS1:ETS2:ETV1:ETV2:ETV3:ETV3L:ETV4:ETV5:FEV:FLI1:GABPA	NRCCGGAWGYR	1e-426	-983.2	0	2412	0.1417	1496.3	0.0516
M05131_2.00:CDX1:CDX2:CDX4	GTTTTATKGCC	1e-426	-982.4	0	2730	0.1604	1832.4	0.0632
M09344_2.00:NFKB1:NFKB2	GGGRCTTYCCC	1e-421	-969.5	0	1716	0.1008	839.2	0.0289
M09356_2.00:NFKB1:NFKB2	GGGRCTTYCCC	1e-421	-969.5	0	1716	0.1008	839.2	0.0289
M10012_2.00:MAFF	AAAATGCTGAC	1e-412	-950.4	0	2017	0.1185	1131.4	0.039
M09166_2.00:HOXA3:HOXA4:HOXA5:HOXA6:HOXA7:HOXB3:HOXB4:HOXB5:HOXB6:HOXB7:HOXB8:HOXC4:HOXC5:HOXC6:HOXC8:HOXD3:HOXD4:HOXD8:PDX1	CATYAATCAA	1e-412	-949.3	0	2321	0.1364	1434.9	0.0495
M09206_2.00:HOXA3:HOXA4:HOXA5:HOXA6:HOXA7:HOXB3:HOXB4:HOXB5:HOXB6:HOXB7:HOXB8:HOXC4:HOXC5:HOXC6:HOXC8:HOXD3:HOXD4:HOXD8:PDX1	CATYAATCAA	1e-412	-949.3	0	2321	0.1364	1434.9	0.0495
M09478_2.00:ARNTL	CACGTGNC	1e-411	-947.8	0	4571	0.2686	4090.2	0.1411
M08397_2.00:SCRT1:SCRT2	AWKCAACAGGTG	1e-410	-945	0	1044	0.0613	326.5	0.0113
M09371_2.00:RUNX1:RUNX2:RUNX3	VAAACCACARM	1e-406	-935.2	0	3318	0.195	2551.4	0.088
M11326_2.00:SOX1:SOX10:SOX11:SOX12:SOX13:SOX14:SOX15:SOX17:SOX18:SOX2:SOX21:SOX3:SOX30:SOX4:SOX5:SOX6:SOX7:SOX8:SOX9:SRY	KYTCTTTGTTTK	1e-402	-926.2	0	3275	0.1924	2512	0.0866
M10461_2.00:EBF1:EBF2:EBF3:EBF4	KTCCCTTGGGA	1e-395	-911.7	0	1784	0.1048	941	0.0325
M05337_2.00:HOXA10:HOXA11:HOXA6:HOXA9:HOXB6:HOXB8:HOXB9:HOXC10:HOXC11:HOXC12:HOXC6:HOXC8:HOXC9:HOXD10:HOXD11:HOXD12:HOXD8:HOXD9	GTTTTATTRCC	1e-387	-893.4	0	2611	0.1534	1797.1	0.062
M09131_2.00:HOXA10:HOXA11:HOXA5:HOXA6:HOXA7:HOXA9:HOXB5:HOXB6:HOXB8:HOXB9:HOXC10:HOXC11:HOXC5:HOXC6:HOXC8:HOXC9:HOXD10:HOXD11:HOXD8:HOXD9	CCATAAATCAT	1e-387	-893.4	0	2400	0.141	1570.1	0.0541
M09203_2.00:HOXA10:HOXA11:HOXA5:HOXA6:HOXA7:HOXA9:HOXB5:HOXB6:HOXB8:HOXB9:HOXC10:HOXC11:HOXC5:HOXC6:HOXC8:HOXC9:HOXD10:HOXD11:HOXD8:HOXD9	CCATAAATCAT	1e-387	-893.4	0	2400	0.141	1570.1	0.0541
M03780_2.00:CDX1:CDX2:CDX4:HOXA13:HOXC13	NTTTTATKGCYY	1e-380	-875.6	0	2861	0.1681	2096.2	0.0723
M04977_2.00:HOXA13:HOXB13:HOXC13:HOXD13	GTTTTATTGGB	1e-377	-869.6	0	1983	0.1165	1165.3	0.0402
M04132_2.00:HEY1:HEY2:HEYL	BACACGTGCV	1e-376	-866.5	0	4020	0.2362	3510.4	0.1211
M05114_2.00:HOXA10:HOXA11:HOXA6:HOXA9:HOXB6:HOXB8:HOXB9:HOXC10:HOXC11:HOXC12:HOXC6:HOXC8:HOXC9:HOXD10:HOXD11:HOXD12:HOXD8:HOXD9	RTTTTATTAC	1e-371	-854.6	0	2779	0.1633	2028.1	0.0699
M09133_2.00:BARX1:BARX2:BSX:DLX1:DLX2:DLX3:DLX4:DLX5:DLX6:EMX1:EMX2:EN1:EN2:EVX1:EVX2:GBX1:GBX2:GSX1:GSX2:HOXA1:HOXA2:HOXA3:HOXA4:HOXA5:HOXB1:HOXB2:HOXB3:HOXB4:HOXB5:HOXC4:HOXC5:HOXD1:HOXD3:HOXD4:ISX:MEOX1:MEOX2:MNX1:MSX1:MSX2:NANOG:NANOGP8:NKX1-1:NKX1-2:PDX1:PROP1:SHOX:SHOX2:UNCX:VAX1:VAX2:VENTX	TTGATGGATG	1e-366	-844.9	0	2111	0.124	1316.4	0.0454
M09196_2.00:BARX1:BARX2:BSX:DLX1:DLX2:DLX3:DLX4:DLX5:DLX6:EMX1:EMX2:EN1:EN2:EVX1:EVX2:GBX1:GBX2:GSX1:GSX2:HOXA1:HOXA2:HOXA3:HOXA4:HOXA5:HOXB1:HOXB2:HOXB3:HOXB4:HOXB5:HOXC4:HOXC5:HOXD1:HOXD3:HOXD4:ISX:MEOX1:MEOX2:MNX1:MSX1:MSX2:NANOG:NANOGP8:NKX1-1:NKX1-2:PDX1:PROP1:SHOX:SHOX2:UNCX:VAX1:VAX2:VENTX	TTGATGGATG	1e-366	-844.9	0	2111	0.124	1316.4	0.0454
M04153_2.00:HEY1	GACACGTGCV	1e-363	-837.9	0	3220	0.1892	2563.3	0.0884
M04753_2.00:ELF1:ELF2:ELF4:ELK1:ELK3:ELK4:ERF:ERG:ETS1:ETS2:ETV1:ETV2:ETV3:ETV3L:ETV4:ETV5:FEV:FLI1:GABPA	NACCGGAAGTR	1e-359	-826.8	0	2790	0.1639	2074.8	0.0716
M09193_2.00:CDX1:CDX2:CDX4	TTTTATKGCYTT	1e-358	-825.1	0	3109	0.1827	2448.9	0.0845
M09459_2.00:ARNT:ARNT2	GCACGTAY	1e-352	-812.7	0	4280	0.2515	3935.2	0.1357
M05332_2.00:HOXA10:HOXA11:HOXA5:HOXA6:HOXA7:HOXA9:HOXB5:HOXB6:HOXB8:HOXB9:HOXC10:HOXC11:HOXC5:HOXC6:HOXC8:HOXC9:HOXD10:HOXD11:HOXD8:HOXD9	DTTTTATTGC	1e-352	-811.2	0	2768	0.1627	2068.7	0.0713
M09148_2.00:MEIS1:MEIS2:MEIS3:PKNOX1:PKNOX2:TGIF1:TGIF2	ATGATTTATGRB	1e-350	-807.8	0	2320	0.1363	1573.3	0.0543
M09178_2.00:MEIS1:MEIS2:MEIS3:PKNOX1:PKNOX2:TGIF1:TGIF2	ATGATTTATGRB	1e-350	-807.8	0	2320	0.1363	1573.3	0.0543
M03175_2.00:HOXA13:HOXB13:HOXC13:HOXD13	KTTTTATTGG	1e-349	-805.4	0	3767	0.2214	3285.2	0.1133
M00336_2.00:PAX2:PAX6	GTGCACAC	1e-349	-805.4	0	3877	0.2278	3425.9	0.1181
M03782_2.00:CDX1:CDX2:CDX4:HOXA13:HOXC13	GKTTTATGGCNB	1e-342	-787.6	0	2899	0.1703	2250.6	0.0776
M03470_2.00:RUNX1:RUNX2:RUNX3	WAACCGCAA	1e-341	-787.3	0	2595	0.1525	1900	0.0655
M00938_2.00:MAX	CCACGTGC	1e-339	-782.7	0	5352	0.3145	5452	0.188
M05124_2.00:HOXA13:HOXB13:HOXC13:HOXD13	GTTTTATTGGB	1e-337	-777	0	4015	0.2359	3650.4	0.1259
M03783_2.00:CDX1:CDX2:CDX4:HOXA13:HOXC13	VDTTTATGRCNH	1e-337	-776.5	0	3740	0.2198	3297.6	0.1137
M10725_2.00:CDX1:CDX2:CDX4	ADANTTTTATKRCC	1e-335	-772.6	0	1750	0.1028	1019.4	0.0352
M01842_2.00:JUN:JUNB:JUND	ATGACKCAH	1e-335	-772.2	0	7205	0.4234	8197.3	0.2827
M09045_2.00:EBF1:EBF2:EBF3:EBF4	RGTCCCWGGGGAS	1e-334	-770.3	0	1142	0.0671	477.5	0.0165
M09527_2.00:EBF1:EBF2:EBF3:EBF4	DGTCCCYRGGGA	1e-333	-768.8	0	1294	0.076	604	0.0208
M09158_2.00:ALX1:ALX3:ALX4:ARX:BARHL1:BARHL2:BARX1:BARX2:BSX:DRGX:EMX1:EMX2:EN1:EN2:ESX1:EVX1:EVX2:GBX1:GBX2:GSX1:GSX2:HESX1:HOXA1:HOXA2:HOXA3:HOXA4:HOXA5:HOXB1:HOXB2:HOXB3:HOXB4:HOXB5:HOXC4:HOXC5:HOXD1:HOXD3:HOXD4:LBX1:MEOX1:MEOX2:MIXL1:MNX1:MSX1:MSX2:NANOG:NANOGP8:NKX1-1:NKX1-2:PDX1:PHOX2A:PHOX2B:PROP1:PRRX1:PRRX2:RAX:RAX2:SHOX:SHOX2:TLX1:TLX3:UNCX:VAX1:VAX2:VENTX:VSX1:VSX2	KTTTTATKGCYYT	1e-333	-768.1	0	2959	0.1739	2347.6	0.081
M08006_2.00:RELA	GGGRATTTCCM	1e-332	-765.2	0	1209	0.071	534.3	0.0184
M09152_2.00:CDX1:CDX2:CDX4	TTTTATTGCTKT	1e-330	-761.5	0	3041	0.1787	2454.8	0.0847
M02869_2.00:MAF:MAFA:MAFB:MAFG:MAFK:NRL	HGTCAGCAHTTT	1e-330	-761	0	1971	0.1158	1252.7	0.0432
M10464_2.00:EBF1	TCCCHDGGG	1e-330	-760.9	0	3486	0.2048	3002	0.1035
M09078_2.00:ELF1:ELF2:ELF4:ELK1:ELK3:ELK4:ERF:ERG:ETS1:ETS2:ETV1:ETV2:ETV3:ETV3L:ETV4:ETV5:FEV:FLI1:GABPA	GRGRCAGGAAGTGG	1e-328	-756	0	1448	0.0851	747.8	0.0258
M09633_2.00:RUNX1:RUNX2:RUNX3	SAAACCACAG	1e-327	-754.4	0	3016	0.1772	2434.1	0.0839
M10643_2.00:HOXA10:HOXA11:HOXA5:HOXA6:HOXA7:HOXA9:HOXB5:HOXB6:HOXB8:HOXB9:HOXC10:HOXC11:HOXC5:HOXC6:HOXC8:HOXC9:HOXD10:HOXD11:HOXD8:HOXD9	DTGATTTATGGT	1e-327	-753.6	0	2316	0.1361	1628.4	0.0562
M06320_2.00:CRX:DMBX1:DPRX:GSC:GSC2:OTX1:OTX2:PITX1:PITX2:PITX3:TPRX1	STTAATCC	1e-326	-751.7	0	4026	0.2366	3708.2	0.1279
M05341_2.00:HOXA10:HOXA11:HOXA6:HOXA9:HOXB6:HOXB8:HOXB9:HOXC10:HOXC11:HOXC12:HOXC6:HOXC8:HOXC9:HOXD10:HOXD11:HOXD12:HOXD8:HOXD9	GTTTTATTRCC	1e-325	-749.9	0	1999	0.1175	1292.6	0.0446
M08163_2.00:RUNX1:RUNX2:RUNX3	AAACCACAGAV	1e-323	-745.4	0	3602	0.2117	3172.5	0.1094
M04655_2.00:SCRT1:SCRT2	HGCAACAGGTG	1e-323	-744.2	0	1129	0.0663	481.5	0.0166
M08303_2.00:SNAI1	CVCTGCACCTGCTSC	1e-322	-742.9	0	1217	0.0715	554.8	0.0191
M09632_2.00:RUNX1:RUNX2:RUNX3	AAACCACARM	1e-320	-737.1	0	3341	0.1963	2857.9	0.0986
M08001_2.00:RELA	NRGGGRMTTTCCMVR	1e-318	-733.4	0	845	0.0497	276	0.0095
M09044_2.00:EBF1	DGTCCCTGGGGACYT	1e-314	-725.2	0	916	0.0538	328.5	0.0113
M07999_2.00:RELA	AGGGRMTTTCCMVR	1e-310	-715.3	0	859	0.0505	292.1	0.0101
M03100_2.00:HOXA13:HOXB13:HOXC13:HOXD13	KTTTTATTGG	1e-310	-714.9	0	4331	0.2545	4180.8	0.1442
M04656_2.00:SCRT1:SCRT2	NGCAACAGGTG	1e-310	-714.1	0	1147	0.0674	513.1	0.0177
M07926_2.00:BCL11A:BCL11B	BTTTCASTTCCTCTT	0	-712.4	0	863	0.0507	296.1	0.0102
M09358_2.00:NFKB1:NFKB2	GGGAATTTCCC	0	-712.1	0	1109	0.0652	483.4	0.0167
M10413_2.00:RBPJ	ASCGTGGGAAM	1e-307	-707.6	0	1384	0.0813	724.7	0.025
M05078_2.00:HOXA10:HOXA11:HOXA9:HOXB9:HOXC10:HOXC11:HOXC12:HOXC9:HOXD10:HOXD11:HOXD12:HOXD9	KTTTTATKRCY	1e-306	-706.3	0	5084	0.2987	5234.5	0.1805
M08003_2.00:RELA	AGGGGATTTCCMVV	1e-305	-704.2	0	813	0.0478	265.5	0.0092
M09973_2.00:BATF:BATF3	AAATGACTG	1e-305	-703.2	0	1935	0.1137	1272.7	0.0439
M00114_2.00:TFAP2A:TFAP2B:TFAP2C:TFAP2D:TFAP2E	THGCCTSAGG	1e-305	-702.7	0	4293	0.2523	4153	0.1432
M09372_2.00:RUNX1:RUNX2:RUNX3	VAAACCACARRV	1e-303	-699.9	0	2688	0.158	2119.8	0.0731
M00140_2.00:ZNF410	CCATCCCA	1e-303	-698.3	0	2367	0.1391	1750.6	0.0604
M09020_2.00:RBPJ	KTTCCCACGCY	1e-303	-698.1	0	4084	0.24	3881.5	0.1339
M01204_2.00:TIGD1	NTATTGCGCT	1e-303	-697.8	0	1619	0.0951	955.2	0.0329
M04159_2.00:NPAS2	DACRCATGTY	1e-300	-692.4	0	5481	0.3221	5829.4	0.201
M11093_2.00:ESR1:ESR2:NR1D1:NR1D2:NR1H2:NR1H3:NR1H4:NR2C1:NR2C2:NR2F1:NR2F2:NR2F6:NR4A1:NR4A2:NR4A3:NR5A1:NR5A2:NR6A1:PPARA:PPARD:PPARG:RARA:RARB:RARG:RORA:RORB:RORC:RXRA:RXRB:RXRG:THRA:THRB	TAANTRGGTCA	1e-300	-691	0	2590	0.1522	2016	0.0695
M09519_2.00:RBPJ:RBPJL	HTTTCCCASG	1e-299	-690.2	0	4548	0.2672	4523.3	0.156
M04081_2.00:MLX	TCACRTGM	1e-299	-689.4	0	7447	0.4376	8783	0.3029
M02432_2.00:LCOR	VAYCGAAACT	1e-297	-684.4	0	3581	0.2104	3247.5	0.112
M03230_2.00:HOXA10:HOXA11:HOXA6:HOXA9:HOXB6:HOXB8:HOXB9:HOXC10:HOXC11:HOXC12:HOXC6:HOXC8:HOXC9:HOXD10:HOXD11:HOXD12:HOXD8:HOXD9	DTTTTAYGAC	1e-295	-681.4	0	3365	0.1977	2976.3	0.1026
M09795_2.00:TCF12:TCF3:TCF4	AHKAACAGGTGTTMVM	1e-295	-681.2	0	1161	0.0682	545.6	0.0188
M04795_2.00:ELF1:ELF2:ELF4:ELK1:ELK3:ELK4:ERF:ERG:ETS1:ETS2:ETV1:ETV2:ETV3:ETV3L:ETV4:ETV5:FEV:FLI1:GABPA	RACCGGAAGTR	1e-295	-680.8	0	1810	0.1064	1164.5	0.0402
M03781_2.00:CDX1:CDX2:CDX4:HOXA13:HOXC13	NTTTTATGACCY	1e-295	-680.6	0	2923	0.1718	2428.9	0.0838
M01721_2.00:MLX	NCACGTGMHH	1e-293	-676.4	0	5539	0.3255	5949.7	0.2052
M09528_2.00:ELF1:ELF2:ELF4:ELK1:ELK3:ELK4:ERF:ERG:ETS1:ETS2:ETV1:ETV2:ETV3:ETV3L:ETV4:ETV5:FEV:FLI1:GABPA	AACCGGAAGT	1e-292	-673.4	0	2551	0.1499	1994.2	0.0688
M00752_2.00:MLX	CACGTGNHN	1e-291	-672.1	0	7031	0.4132	8185.2	0.2823
M04155_2.00:HEY1	VACACGYGCV	1e-289	-667.3	0	3510	0.2063	3185.7	0.1099
M09369_2.00:RUNX1:RUNX2:RUNX3	AAACCACARM	1e-289	-665.6	0	3524	0.2071	3206.3	0.1106
M04709_2.00:ELF1:ELF2:ELF4:ELK1:ELK3:ELK4:ERF:ERG:ETS1:ETS2:ETV1:ETV2:ETV3:ETV3L:ETV4:ETV5:FEV:FLI1:GABPA	VRCMGGAAGTR	1e-288	-665.1	0	5872	0.345	6461.4	0.2228
M09355_2.00:RELA	GGGAMTTTCCC	1e-287	-661.3	0	1557	0.0915	927	0.032
M05104_2.00:HOXA10:HOXA11:HOXA5:HOXA6:HOXA7:HOXA9:HOXB5:HOXB6:HOXB8:HOXB9:HOXC10:HOXC11:HOXC5:HOXC6:HOXC8:HOXC9:HOXD10:HOXD11:HOXD8:HOXD9	DTTTTATTGC	1e-286	-660	0	4074	0.2394	3940.6	0.1359
M08008_2.00:RELA	RGGGGATTTCCMVVS	1e-286	-659.8	0	769	0.0452	253.6	0.0087
M08745_2.00:MYF5:MYOD1:MYOG	GRCAGVRACAGCTGC	1e-286	-659.1	0	1326	0.0779	707.8	0.0244
M08007_2.00:RELA	AGGGRATTTCCAV	1e-284	-654.7	0	855	0.0502	316.5	0.0109
M08004_2.00:RELA	HAGGGRMTTTCCMRR	1e-283	-653.7	0	817	0.048	289.6	0.01
M08002_2.00:RELA	AGGGRMTTTCCMVVS	1e-283	-651.8	0	786	0.0462	268.4	0.0093
M05832_2.00:MAX	CACGTG	1e-280	-646.8	0	7646	0.4493	9210.3	0.3176
M05018_2.00:CDX1:CDX2:CDX4	GTTTTATGGCC	1e-279	-642.5	0	2075	0.1219	1490.7	0.0514
M08005_2.00:RELA	NAGGGRATTTCCAVN	1e-278	-642.4	0	803	0.0472	284.5	0.0098
M01716_2.00:MNT	NCACGTGNN	1e-278	-641.2	0	6218	0.3654	7033.2	0.2425
M08000_2.00:RELA	HAGGGRATTTCCAV	1e-278	-641.1	0	893	0.0525	351.9	0.0121
M03284_2.00:HOXA10:HOXA11:HOXA5:HOXA6:HOXA7:HOXA9:HOXB5:HOXB6:HOXB8:HOXB9:HOXC10:HOXC11:HOXC5:HOXC6:HOXC8:HOXC9:HOXD10:HOXD11:HOXD8:HOXD9	TTTTACGAC	1e-278	-640.3	0	4511	0.2651	4575.7	0.1578
M10415_2.00:RBPJ	ABTGTGGGAAMCK	1e-277	-639.5	0	892	0.0524	351.1	0.0121
M09626_2.00:RELA	WGGGGATTTCCC	1e-277	-639.4	0	1141	0.067	555.9	0.0192
M10672_2.00:BARHL1:BARHL2:EMX1:EMX2:HMX1:HMX2:HMX3:HOXA4:HOXB4:HOXC4:HOXD4:LBX2:NKX1-1:NKX1-2:TLX1:TLX2:TLX3:VAX1:VAX2:VENTX	CGGTAAKTGG	1e-277	-639.4	0	3151	0.1852	2775.9	0.0957
M00529_2.00:TPRX1	TTAATCCC	1e-274	-632.8	0	4164	0.2447	4115	0.1419
M01495_2.00:ELF1:ELF2:ELF4:ELK1:ELK3:ELK4:ERF:ERG:ETS1:ETS2:ETV1:ETV2:ETV3:ETV3L:ETV4:ETV5:ETV6:FEV:FLI1:GABPA	NACCGGAARY	1e-274	-631.8	0	5684	0.334	6266.5	0.2161
M03086_2.00:HOXA10:HOXA11:HOXA5:HOXA6:HOXA7:HOXA9:HOXB5:HOXB6:HOXB8:HOXB9:HOXC10:HOXC11:HOXC5:HOXC6:HOXC8:HOXC9:HOXD10:HOXD11:HOXD8:HOXD9	DTTTTATTRCY	1e-273	-630.9	0	5194	0.3052	5558.4	0.1917
M04979_2.00:HOXA13:HOXB13:HOXC13:HOXD13	KTTTTATTGGN	1e-273	-630.1	0	3142	0.1846	2779.9	0.0959
M11242_2.00:RELA	GGGAMTTTCCCN	1e-272	-627.8	0	1769	0.1039	1175.9	0.0406
M09373_2.00:RUNX1:RUNX2:RUNX3	VAAACCACAGRV	1e-271	-625.3	0	2615	0.1537	2137.7	0.0737
M05117_2.00:HOXA10:HOXA11:HOXA6:HOXA9:HOXB6:HOXB8:HOXB9:HOXC10:HOXC11:HOXC12:HOXC6:HOXC8:HOXC9:HOXD10:HOXD11:HOXD12:HOXD8:HOXD9	GGTAATAAAAH	1e-270	-622.8	0	3316	0.1949	3013.9	0.1039
M08166_2.00:SOX1:SOX10:SOX11:SOX12:SOX13:SOX14:SOX15:SOX17:SOX18:SOX2:SOX21:SOX3:SOX30:SOX4:SOX5:SOX6:SOX7:SOX8:SOX9:SRY	DAACAATGGNN	1e-269	-620.4	0	5658	0.3325	6256.1	0.2157
M08420_2.00:CDX1:CDX2:CDX4:HOXA13:HOXC13	KTTTTATGGCY	1e-269	-619.8	0	3092	0.1817	2733.9	0.0943
M05395_2.00:HOXA10:HOXA11:HOXA6:HOXA9:HOXB6:HOXB8:HOXB9:HOXC10:HOXC11:HOXC12:HOXC6:HOXC8:HOXC9:HOXD10:HOXD11:HOXD12:HOXD8:HOXD9	DTTTTATTACC	1e-267	-616	0	2061	0.1211	1506.1	0.0519
M07567_2.00:ZNF671	YYVMTCCACTCH	1e-266	-614.7	0	2932	0.1723	2541.8	0.0877
M01486_2.00:ELF1:ELF2:ELF4:ELK1:ELK3:ELK4:ERF:ERG:ETS1:ETS2:ETV1:ETV2:ETV3:ETV3L:ETV4:ETV5:FEV:FLI1:GABPA	NACCGGAARY	1e-266	-613.2	0	5794	0.3405	6474.9	0.2233
M09021_2.00:RBPJ	TTTTCCCASGV	1e-264	-610	0	4506	0.2648	4633.8	0.1598
M03465_2.00:RUNX1:RUNX2:RUNX3	AAACCGCAAA	1e-262	-604.8	0	1940	0.114	1385.7	0.0478
M10462_2.00:EBF1	ATTCCCYTGGGRN	1e-260	-599.5	0	2155	0.1266	1633.9	0.0563
M04544_2.00:ZNF296	TRSTGGACABT	1e-260	-599.4	0	3102	0.1823	2780.1	0.0959
M03773_2.00:HOXA10:HOXA11:HOXA6:HOXA9:HOXB6:HOXB8:HOXB9:HOXC10:HOXC11:HOXC12:HOXC5:HOXC6:HOXC8:HOXC9:HOXD10:HOXD11:HOXD12:HOXD8:HOXD9	DTTTTATTRCY	1e-259	-598.4	0	3099	0.1821	2778	0.0958
M11187_2.00:ESR1:ESR2:NR1D1:NR1D2:NR1H2:NR1H3:NR1H4:NR2C1:NR2C2:NR2F1:NR2F2:NR2F6:NR4A1:NR4A2:NR4A3:NR5A1:NR5A2:NR6A1:PPARA:PPARD:PPARG:RARA:RARB:RARG:RORA:RORB:RORC:RXRA:RXRB:RXRG:THRA:THRB	TGACCYA	1e-259	-597.9	0	2911	0.1711	2542.4	0.0877
M01307_2.00:RUNX1:RUNX2:RUNX3	NWAACCGCAA	1e-259	-596.7	0	3608	0.212	3441.6	0.1187
M02857_2.00:MAF:MAFA:MAFB:MAFG:MAFK	GTCAGCAWWWTT	1e-258	-596	0	2199	0.1292	1688.5	0.0582
M01143_2.00:CREB3L1:CREB3L2:CREB3L4	KACGTGGC	1e-258	-595.7	0	3173	0.1864	2877.3	0.0992
M10618_2.00:GTF2IRD1	CAGCGRNV	1e-257	-593.5	0	8332	0.4896	10461.6	0.3608
M02814_2.00:ASCL1:ASCL2	ARCAGCTGCT	1e-256	-591.3	0	1873	0.1101	1327.2	0.0458
M04049_2.00:TFAP2A:TFAP2B:TFAP2C:TFAP2D:TFAP2E	NSCCTNAGGSV	1e-256	-590	0	4986	0.293	5356.5	0.1847
M07944_2.00:ELF5:SPI1:SPIB:SPIC	VAAAAGAGGAAGTGAAAVH	1e-255	-588.1	0	361	0.0212	49.5	0.0017
M09046_2.00:ELF1:ELF2:ELF4:ELK1:ELK3:ELK4:ERF:ERG:ETS1:ETS2:ETV1:ETV2:ETV3:ETV3L:ETV4:ETV5:FEV:FLI1:GABPA	GRCCGGAAGTG	1e-253	-583.5	0	1436	0.0844	877	0.0302
M09057_2.00:ELF1:ELF2:ELF4:ELK1:ELK3:ELK4:ERF:ERG:ETS1:ETS2:ETV1:ETV2:ETV3:ETV3L:ETV4:ETV5:FEV:FLI1:GABPA	RGRCAGGAAGYGG	1e-252	-581.6	0	2689	0.158	2293.8	0.0791
M05112_2.00:HOXA10:HOXA11:HOXA6:HOXA9:HOXB6:HOXB8:HOXB9:HOXC10:HOXC11:HOXC12:HOXC6:HOXC8:HOXC9:HOXD10:HOXD11:HOXD12:HOXD8:HOXD9	RTTTTATTGC	1e-250	-577.8	0	3093	0.1817	2806.2	0.0968
M03467_2.00:RUNX1:RUNX2:RUNX3	AAACCGCAAA	1e-250	-577.6	0	2033	0.1195	1522.7	0.0525
M04981_2.00:HOXA13:HOXB13:HOXC13:HOXD13	DTTTTATTGGN	1e-250	-577.5	0	3109	0.1827	2827.5	0.0975
M08395_2.00:ZNF260	GCTSYVTHCTHYTCC	1e-250	-576.9	0	3134	0.1842	2861	0.0987
M09173_2.00:ALX1:ALX3:ALX4:ARX:BARHL1:BARHL2:BARX1:BARX2:BSX:DRGX:EMX1:EMX2:EN1:EN2:ESX1:EVX1:EVX2:GBX1:GBX2:GSX1:GSX2:HESX1:HOXA1:HOXA2:HOXA3:HOXA4:HOXA5:HOXB1:HOXB2:HOXB3:HOXB4:HOXB5:HOXC4:HOXC5:HOXD1:HOXD3:HOXD4:LBX1:MEOX1:MEOX2:MIXL1:MNX1:MSX1:MSX2:NANOG:NANOGP8:NKX1-1:NKX1-2:PDX1:PHOX2A:PHOX2B:PROP1:PRRX1:PRRX2:RAX:RAX2:SHOX:SHOX2:TLX1:TLX3:UNCX:VAX1:VAX2:VENTX:VSX1:VSX2	TTTTATKGCYYT	1e-248	-572.2	0	3420	0.201	3240.3	0.1117
M08724_2.00:MYF5:MYOD1:MYOG	GRCAGVRACAGCTGC	1e-246	-567.4	0	1364	0.0802	819.4	0.0283
M09539_2.00:ELF1:ELF2:ELF4:ELK1:ELK3:ELK4:ERF:ERG:ETS1:ETS2:ETV1:ETV2:ETV3:ETV3L:ETV4:ETV5:FEV:FLI1:GABPA	DCCGGAARYN	1e-245	-564.9	0	6715	0.3946	7993.6	0.2757
M09351_2.00:RELA	MAGGGAATTTCCMV	1e-245	-564.5	0	755	0.0444	285.4	0.0098
M07803_2.00:MYC	CACGTGSH	1e-243	-561.3	0	5356	0.3147	5962.4	0.2056
M10246_2.00:SALL2	GGGTGGG	1e-243	-560.8	0	6353	0.3733	7451.6	0.257
M09064_2.00:SPI1:SPIB:SPIC	ARAAAGAGGAAGTGAAA	1e-243	-560.5	0	459	0.027	98.1	0.0034
M04130_2.00:CLOCK	NACRCATGTY	1e-243	-559.7	0	6114	0.3593	7092.2	0.2446
M03134_2.00:HOXA10:HOXA11:HOXA9:HOXB9:HOXC10:HOXC11:HOXC12:HOXC9:HOXD10:HOXD11:HOXD12:HOXD9	KTTTTATKGCY	1e-243	-559.6	0	4533	0.2664	4784	0.165
M03167_2.00:HMBOX1:HNF1A:HNF1B	STTAACTARK	1e-242	-558.1	0	2632	0.1547	2260.6	0.078
M00122_2.00:MAX	NNCACGTGB	1e-241	-556.7	0	8126	0.4775	10243	0.3532
M00112_2.00:TFAP2A:TFAP2B:TFAP2C:TFAP2D:TFAP2E	CCTSAGGCNA	1e-241	-556.7	0	3625	0.213	3542.9	0.1222
M09235_2.00:IRF4:IRF8	RAAAGAGGAASTGAAASY	1e-241	-556.4	0	412	0.0242	76.6	0.0026
M09081_2.00:ELF1:ELF2:ELF4:ELK1:ELK3:ELK4:ERF:ERG:ETS1:ETS2:ETV1:ETV2:ETV3:ETV3L:ETV4:ETV5:ETV6:FEV:FLI1:GABPA	RRACMGGAAGYGRV	1e-241	-555.2	0	2192	0.1288	1735.1	0.0598
M11231_2.00:NFKB1:NFKB2	GGRAATTCCCCN	1e-241	-555.1	0	1583	0.093	1055.2	0.0364
M09672_2.00:HOXA10:HOXA11:HOXA6:HOXA9:HOXB6:HOXB8:HOXB9:HOXC10:HOXC11:HOXC12:HOXC5:HOXC6:HOXC8:HOXC9:HOXD10:HOXD11:HOXD12:HOXD8:HOXD9	TCATAAAACM	1e-239	-552.5	0	4939	0.2902	5380	0.1855
M06140_2.00:SCRT1:SCRT2	CCACCTGTTGMNY	1e-239	-551.9	0	1155	0.0679	631.6	0.0218
M09865_2.00:ARNT:ARNT2	YRCGTGSS	1e-239	-551	0	4318	0.2537	4502.9	0.1553
M03253_2.00:HOXA10:HOXA11:HOXA6:HOXA9:HOXB6:HOXB8:HOXB9:HOXC10:HOXC11:HOXC12:HOXC6:HOXC8:HOXC9:HOXD10:HOXD11:HOXD12:HOXD8:HOXD9	TTTTTATTRC	1e-239	-550.7	0	4219	0.2479	4365.2	0.1505
M05129_2.00:CDX1:CDX2:CDX4	GTTTTATKGCC	1e-236	-545.1	0	2241	0.1317	1807.4	0.0623
M09047_2.00:ELF5:SPI1:SPIB:SPIC	AAAAAGAGGAAGTGRRR	1e-235	-541.7	0	539	0.0317	148.7	0.0051
M07767_2.00:ZNF736	AAAARCCCCAGA	1e-234	-539.5	0	637	0.0374	212.9	0.0073
M03098_2.00:HOXA13:HOXB13:HOXC13:HOXD13	DTTTTATTGG	1e-233	-538	0	4747	0.2789	5139.9	0.1773
M11294_2.00:LEF1:TCF7:TCF7L1:TCF7L2	KGWSWWCAAAGV	1e-232	-536.5	0	4262	0.2504	4457.1	0.1537
M04756_2.00:EHF:ELF1:ELF2:ELF3:ELF4:ELF5:ETV6:ETV7:SPI1:SPIC	NABGMGGAAGTR	1e-232	-535.5	0	4299	0.2526	4511.7	0.1556
M09068_2.00:SPI1:SPIB:SPIC	AAAAGAGGAAGTGAAAV	1e-231	-532.1	0	386	0.0227	69.9	0.0024
M11237_2.00:RELA	GGGAATTTCC	1e-230	-530.6	0	1202	0.0706	693.6	0.0239
M04772_2.00:ELF1:ELF2:ELF4:ELK1:ELK3:ELK4:ERF:ERG:ETS1:ETS2:ETV1:ETV2:ETV3:ETV3L:ETV4:ETV5:FEV:FLI1:GABPA	VACAGGAARTG	1e-229	-528.2	0	2657	0.1561	2340.7	0.0807
M09065_2.00:ELF5:SPI1:SPIB:SPIC	RRAAAGAGGAAGTGV	1e-229	-527.9	0	711	0.0418	270.9	0.0093
M11316_2.00:LEF1:TCF7:TCF7L1:TCF7L2	ATCAAAGVVM	1e-228	-526.2	0	5857	0.3442	6798.3	0.2344
M10476_2.00:ELF5:SPI1:SPIB:SPIC	TTTCACTTC	1e-227	-524.7	0	1205	0.0708	701	0.0242
M08131_2.00:CDX1:CDX2:CDX4	TTTTATKGCYY	1e-227	-524.3	0	3379	0.1986	3279.4	0.1131
M08119_2.00:FOXH1	YNSAATCCACA	1e-227	-522.9	0	2701	0.1587	2404.1	0.0829
M05106_2.00:HOXA10:HOXA11:HOXA5:HOXA6:HOXA7:HOXA9:HOXB5:HOXB6:HOXB8:HOXB9:HOXC10:HOXC11:HOXC5:HOXC6:HOXC8:HOXC9:HOXD10:HOXD11:HOXD8:HOXD9	GTTTTATKGC	1e-226	-522.5	0	4214	0.2476	4422.8	0.1525
M05290_2.00:HOXA10:HOXA11:HOXA5:HOXA6:HOXA7:HOXA9:HOXB5:HOXB6:HOXB8:HOXB9:HOXC10:HOXC11:HOXC5:HOXC6:HOXC8:HOXC9:HOXD10:HOXD11:HOXD8:HOXD9	DTTTTATTGC	1e-224	-516.4	0	4310	0.2533	4571.9	0.1577
M09538_2.00:ELF5:SPI1:SPIB:SPIC	AGAGGAAGTG	1e-223	-515.4	0	1567	0.0921	1081.9	0.0373
M09577_2.00:CRX:DMBX1:DPRX:GSC:GSC2:OTX1:OTX2:PITX1:PITX2:PITX3:TPRX1	GCTAATCC	1e-223	-514	0	5115	0.3006	5732.6	0.1977
M02711_2.00:RELA	GGGAATTTCC	1e-222	-512.1	0	1103	0.0648	614.7	0.0212
M05025_2.00:CRX:DMBX1:DPRX:GSC:GSC2:OTX1:OTX2:PITX1:PITX2:PITX3:TPRX1	YTAATCCYYY	1e-222	-512	0	4215	0.2477	4448.2	0.1534
M04983_2.00:HOXA13:HOXB13:HOXC13:HOXD13	RTTTTATTGGN	1e-222	-511.6	0	2959	0.1739	2753.8	0.095
M01498_2.00:MAX	CCACGTGN	1e-221	-509.3	0	7761	0.456	9806.1	0.3382
M09838_2.00:MYF5:MYOD1:MYOG	SRACAGGTGKTG	1e-221	-509	0	1835	0.1078	1385.4	0.0478
M09072_2.00:ELF1:ELF2:ELF4:ELK1:ELK3:ELK4:ERF:ERG:ETS1:ETS2:ETV1:ETV2:ETV3:ETV3L:ETV4:ETV5:FEV:FLI1:GABPA	GGSRCCGGAAGYGG	1e-220	-507.2	0	1017	0.0598	538.9	0.0186
M09674_2.00:CDX1:CDX2:CDX4:HOXA13:HOXC13	TTTTATGRYY	1e-220	-507.2	0	6669	0.3919	8092.4	0.2791
M09821_2.00:MYF5:MYF6:MYOD1:MYOG	TGACAGCTGSWGB	1e-219	-504.5	0	1422	0.0836	939.9	0.0324
M09572_2.00:CDX1:CDX2:CDX4	DTTTTATKRC	1e-217	-501.2	0	4167	0.2449	4406.9	0.152
M04691_2.00:DMRT1:DMRT2:DMRT3:DMRTA2:DMRTC2	AATGTAKCAATT	1e-216	-498.9	0	1615	0.0949	1152	0.0397
M01735_2.00:CLOCK	NVCACGTGBN	1e-214	-495	0	5795	0.3405	6793.4	0.2343
M09536_2.00:ELF1:ELF2:ELF4:ELK1:ELK3:ELK4:ERF:ERG:ETS1:ETS2:ETV1:ETV2:ETV3:ETV3L:ETV4:ETV5:FEV:FLI1:GABPA	ACAGGAAGTG	1e-213	-491.7	0	2800	0.1645	2585.5	0.0892
M05339_2.00:HOXA10:HOXA11:HOXA6:HOXA9:HOXB6:HOXB8:HOXB9:HOXC10:HOXC11:HOXC12:HOXC6:HOXC8:HOXC9:HOXD10:HOXD11:HOXD12:HOXD8:HOXD9	RTTTTATTRCC	1e-212	-490.3	0	2149	0.1263	1778.8	0.0613
M09432_2.00:TBP:TBPL2	CTATAAAARG	1e-212	-488.6	0	3776	0.2219	3892.8	0.1342
M01493_2.00:ELF1:ELF2:ELF4:ELK1:ELK3:ELK4:ERF:ERG:ETS1:ETS2:ETV1:ETV2:ETV3:ETV3L:ETV4:ETV5:FEV:FLI1:GABPA	NRCCGGAART	1e-212	-488.4	0	6454	0.3792	7817.6	0.2696
M04122_2.00:MYF5:MYOD1:MYOG	BAACAGCTGTYV	1e-212	-488.2	0	1698	0.0998	1257.3	0.0434
M09370_2.00:RUNX1:RUNX2:RUNX3	MMAAACCACARACM	1e-211	-487.3	0	1831	0.1076	1409.7	0.0486
M06449_2.00:SOX1:SOX10:SOX11:SOX12:SOX13:SOX14:SOX15:SOX17:SOX18:SOX2:SOX21:SOX3:SOX30:SOX4:SOX5:SOX6:SOX7:SOX8:SOX9:SRY	CTCCTTTGTCC	1e-211	-486.9	0	2050	0.1205	1665.3	0.0574
M09537_2.00:SPI1:SPIB:SPIC	AAAGRGGAAGTG	1e-210	-483.8	0	1265	0.0743	798.3	0.0275
M09062_2.00:ELF1:ELF2:ELF4:ELK1:ELK3:ELK4:ERF:ERG:ETS1:ETS2:ETV1:ETV2:ETV3:ETV3L:ETV4:ETV5:FEV:FLI1:GABPA	VRCAGGAAGKR	1e-208	-481	0	6741	0.3961	8285.5	0.2857
M10779_2.00:HOXA10:HOXA11:HOXA6:HOXA9:HOXB6:HOXB8:HOXB9:HOXC10:HOXC11:HOXC12:HOXC5:HOXC6:HOXC8:HOXC9:HOXD10:HOXD11:HOXD12:HOXD8:HOXD9	VSNTTTATGGCNVN	1e-208	-480.3	0	1690	0.0993	1258.6	0.0434
M08039_2.00:RELA	KGGAATTTCCC	1e-207	-477.1	0	1595	0.0937	1156.8	0.0399
M04547_2.00:ZBTB26	NTTTTCTRGATH	1e-206	-476.6	0	2662	0.1564	2436.9	0.084
M10493_2.00:ELF1:ELF2:ELF4:ELK1:ELK3:ELK4:ERF:ERG:ETS1:ETS2:ETV1:ETV2:ETV3:ETV3L:ETV4:ETV5:FEV:FLI1:GABPA	ACCGGAAGYV	1e-203	-469.6	0	3562	0.2093	3641.7	0.1256
M04185_2.00:MSC:TCF21	NAACAGCTGTTR	1e-203	-469.5	0	1886	0.1108	1497.4	0.0516
M08191_2.00:PRDM1	ACTTTCAC	1e-203	-469.2	0	5035	0.2959	5736	0.1978
M04120_2.00:MYF5:MYOD1:MYOG	BAACAGCTGTYV	1e-203	-468.8	0	1637	0.0962	1213.6	0.0419
M05119_2.00:HOXA10:HOXA11:HOXA6:HOXA9:HOXB6:HOXB8:HOXB9:HOXC10:HOXC11:HOXC12:HOXC6:HOXC8:HOXC9:HOXD10:HOXD11:HOXD12:HOXD8:HOXD9	GGTAATAAAAH	1e-203	-468.5	0	2313	0.1359	2012.7	0.0694
M05335_2.00:HOXA10:HOXA11:HOXA6:HOXA9:HOXB6:HOXB8:HOXB9:HOXC10:HOXC11:HOXC12:HOXC6:HOXC8:HOXC9:HOXD10:HOXD11:HOXD12:HOXD8:HOXD9	GTTTTATKGCC	1e-203	-468.4	0	3132	0.184	3064.9	0.1057
M05080_2.00:HOXA10:HOXA11:HOXA9:HOXB9:HOXC10:HOXC11:HOXC12:HOXC9:HOXD10:HOXD11:HOXD12:HOXD9	DTTTTATKGCY	1e-202	-466.1	0	4131	0.2427	4440.2	0.1531
M09808_2.00:HIF1A	SBACGTGCV	1e-201	-463.9	0	4295	0.2524	4678.7	0.1613
M03229_2.00:HOXA10:HOXA11:HOXA6:HOXA9:HOXB6:HOXB8:HOXB9:HOXC10:HOXC11:HOXC12:HOXC6:HOXC8:HOXC9:HOXD10:HOXD11:HOXD12:HOXD8:HOXD9	WTTTTATTRC	1e-200	-462.6	0	6279	0.369	7627.2	0.263
M00664_2.00:FOXC1:FOXC2:FOXD1:FOXD2:FOXD3:FOXD4:FOXD4L1:FOXD4L3:FOXD4L4:FOXD4L5:FOXD4L6:FOXE1:FOXF1:FOXF2:FOXI1:FOXL1:FOXL2:FOXS1	ATAAACAA	1e-200	-462	0	2948	0.1732	2834.4	0.0977
M08881_2.00:BCL11A:BCL11B	YTYTCACTTCCTCTTTY	1e-200	-461.9	0	821	0.0482	396.1	0.0137
M05876_2.00:NR1H2:NR1H3:NR1H4:NR2C1:NR2C2:NR2F1:NR2F2:NR2F6:RARA:RARB:RARG:RORA:RORB:RORC:RXRA:RXRB:RXRG:VDR	KAGGTCAWHKD	1e-199	-460.3	0	4836	0.2842	5468.1	0.1886
M08170_2.00:SOX1:SOX10:SOX11:SOX12:SOX13:SOX14:SOX15:SOX17:SOX18:SOX2:SOX21:SOX3:SOX30:SOX4:SOX5:SOX6:SOX7:SOX8:SOX9:SRY	CCWTTGTT	1e-199	-459.4	0	2938	0.1726	2826.3	0.0975
M09092_2.00:FOXH1	SAATCCACA	1e-198	-457.8	0	3487	0.2049	3565.1	0.1229
M05619_2.00:NR1I2:NR1I3:VDR	AAAGTTCAT	1e-197	-455.5	0	3762	0.2211	3949.6	0.1362
M05770_2.00:SOX1:SOX10:SOX11:SOX12:SOX13:SOX14:SOX15:SOX17:SOX18:SOX2:SOX21:SOX3:SOX30:SOX4:SOX5:SOX6:SOX7:SOX8:SOX9:SRY	CCATTGTTMN	1e-197	-455.2	0	6354	0.3734	7766.6	0.2678
M04211_2.00:ASCL1:ASCL2	RGCAGCTGCY	1e-197	-453.9	0	2356	0.1384	2090.3	0.0721
M05397_2.00:HOXA10:HOXA11:HOXA6:HOXA9:HOXB6:HOXB8:HOXB9:HOXC10:HOXC11:HOXC12:HOXC6:HOXC8:HOXC9:HOXD10:HOXD11:HOXD12:HOXD8:HOXD9	DTTTTATTACC	1e-197	-453.8	0	2200	0.1293	1897.6	0.0654
M05085_2.00:HOXA10:HOXA11:HOXC10:HOXC11:HOXC12:HOXD10:HOXD11:HOXD12:MEOX1	VGTAATAAAAH	1e-196	-453.2	0	3210	0.1886	3200.6	0.1104
M02398_2.00:NR1I2:NR1I3:VDR	GAGTTCAW	1e-196	-453.1	0	5396	0.3171	6316.9	0.2178
M09569_2.00:CRX:DMBX1:DPRX:GSC:GSC2:OTX1:OTX2:PITX1:PITX2:PITX3:TPRX1	NYTAATCCYB	1e-194	-448.9	0	4552	0.2675	5086.5	0.1754
M05334_2.00:HOXA10:HOXA11:HOXA5:HOXA6:HOXA7:HOXA9:HOXB5:HOXB6:HOXB8:HOXB9:HOXC10:HOXC11:HOXC5:HOXC6:HOXC8:HOXC9:HOXD10:HOXD11:HOXD8:HOXD9	DTTTTATTRC	1e-192	-444	0	4262	0.2504	4682.5	0.1615
M04805_2.00:SPI1:SPIB:SPIC	RAAWGMGGAAGTD	1e-192	-443.9	0	1515	0.089	1108.2	0.0382
M11308_2.00:SOX1:SOX10:SOX11:SOX12:SOX13:SOX14:SOX15:SOX17:SOX18:SOX2:SOX21:SOX3:SOX30:SOX4:SOX5:SOX6:SOX7:SOX8:SOX9:SRY	ACAAAGGG	1e-192	-443.8	0	7782	0.4573	10060.4	0.3469
M08389_2.00:ZBTB12	CTAGAACCY	1e-191	-440.5	0	2742	0.1611	2607.4	0.0899
M03283_2.00:HOXA10:HOXA11:HOXA5:HOXA6:HOXA7:HOXA9:HOXB5:HOXB6:HOXB8:HOXB9:HOXC10:HOXC11:HOXC5:HOXC6:HOXC8:HOXC9:HOXD10:HOXD11:HOXD8:HOXD9	WTTTWATTGC	1e-190	-438.5	0	5541	0.3256	6577.3	0.2268
M09639_2.00:SOX1:SOX10:SOX11:SOX12:SOX13:SOX14:SOX15:SOX17:SOX18:SOX2:SOX21:SOX3:SOX30:SOX4:SOX5:SOX6:SOX7:SOX8:SOX9:SRY	RACAAWGG	1e-186	-429.1	0	9640	0.5665	13190.7	0.4549
M08714_2.00:LYL1:TAL1:TAL2	SAGGAAACAGCTGG	1e-186	-429.1	0	1639	0.0963	1267.2	0.0437
M08763_2.00:LYL1:TAL1:TAL2	SAGGAAACAGCTGG	1e-186	-429.1	0	1639	0.0963	1267.2	0.0437
M05109_2.00:HOXA10:HOXA11:HOXA5:HOXA6:HOXA7:HOXA9:HOXB5:HOXB6:HOXB8:HOXB9:HOXC10:HOXC11:HOXC5:HOXC6:HOXC8:HOXC9:HOXD10:HOXD11:HOXD8:HOXD9	DTTTTATTGC	1e-185	-427.6	0	3272	0.1923	3340.8	0.1152
M09108_2.00:FOXO1:FOXO3:FOXO4:FOXO6	GTAAACAGGM	1e-185	-427.2	0	6530	0.3837	8130.6	0.2804
M01753_2.00:MAX	VCACGTGGN	1e-184	-425.5	0	8024	0.4715	10517.8	0.3627
M07946_2.00:ELF5:SPI1:SPIB:SPIC	AAAAAGAGGAAGTGV	1e-184	-425.5	0	365	0.0214	83.8	0.0029
M01475_2.00:ELF5:SPI1:SPIB:SPIC	ADGVGGAAGT	1e-184	-424	0	8191	0.4813	10795.4	0.3723
M03141_2.00:HOXA13:HOXB13:HOXC13:HOXD13	DTTTTATTGG	1e-183	-422.7	0	3998	0.2349	4361.1	0.1504
M08118_2.00:FOXC1:FOXC2:FOXG1:FOXI1:FOXI3:FOXJ2:FOXJ3:FOXK1:FOXK2:FOXP1:FOXP3:FOXP4	AWGTAAACANV	1e-183	-422.7	0	4209	0.2473	4662.2	0.1608
M08026_2.00:ELF5:SPI1:SPIB:SPIC	RAAAAGAGGAAGTGR	1e-183	-422.2	0	423	0.0249	117.4	0.004
M03132_2.00:HOXA10:HOXA11:HOXA9:HOXB9:HOXC10:HOXC11:HOXC12:HOXC9:HOXD10:HOXD11:HOXD12:HOXD9	DTTTTATTRCY	1e-183	-421.6	0	5600	0.3291	6718.6	0.2317
M04803_2.00:SPI1:SPIB:SPIC	DAWGCGGAAGTR	1e-182	-421	0	1400	0.0823	1009.2	0.0348
M09243_2.00:IRF4:IRF8	RAAAGAGGAASTGAAACH	1e-181	-417.5	0	502	0.0295	170	0.0059
M09374_2.00:RUNX1:RUNX2:RUNX3	CWAACCACAGCC	1e-181	-417.1	0	2036	0.1196	1756.3	0.0606
M09236_2.00:IRF4:IRF8	RAAAGRGGAAGTGAAASTRR	1e-180	-415.4	0	281	0.0165	45.8	0.0016
M09246_2.00:IRF4:IRF8	RAAAGRGGAAGTGAAASTRR	1e-180	-415.4	0	281	0.0165	45.8	0.0016
M05749_2.00:SOX1:SOX10:SOX11:SOX12:SOX13:SOX14:SOX15:SOX17:SOX18:SOX2:SOX21:SOX3:SOX30:SOX4:SOX5:SOX6:SOX7:SOX8:SOX9:SRY	AGAACAATRG	1e-178	-410.5	0	4001	0.2351	4397	0.1516
M04806_2.00:SPI1:SPIB:SPIC	RAAWGRGGAAGTR	1e-177	-408.2	0	1076	0.0632	680.6	0.0235
M07684_2.00:ZNF197	CYTGTTCTTGWCTTT	1e-175	-403.8	0	1856	0.1091	1559.7	0.0538
M11317_2.00:LEF1:TCF7:TCF7L1:TCF7L2	NVATCAAAGM	1e-175	-403.1	0	6930	0.4072	8841.2	0.3049
M09433_2.00:TBP:TBPL2	CTATAAAARS	1e-174	-400.9	0	4125	0.2424	4600.2	0.1586
M09580_2.00:CDX1:CDX2:CDX4:HOXA13:HOXC13	WTTTATGRCC	1e-171	-393.8	0	3408	0.2003	3606.7	0.1244
M03209_2.00:HOXA10:HOXA11:HOXC10:HOXC11:HOXC12:HOXD10:HOXD11:HOXD12:MEOX2	TTTTATTAC	1e-170	-393.2	0	4726	0.2777	5497.4	0.1896
M10929_2.00:MEF2A	NKTWCCATAWATRGWAAB	1e-169	-390.8	0	461	0.0271	153.6	0.0053
M02718_2.00:SOX1:SOX10:SOX11:SOX12:SOX13:SOX14:SOX15:SOX17:SOX18:SOX2:SOX21:SOX3:SOX30:SOX4:SOX5:SOX6:SOX7:SOX8:SOX9:SRY	GACAATGDN	1e-169	-390.3	0	7112	0.4179	9176.8	0.3165
M11239_2.00:RELA	BCWGGGGANTT	1e-169	-390.1	0	8634	0.5073	11652.2	0.4018
M08186_2.00:BACH1:BACH2	TCAGCADTT	1e-169	-389.2	0	2580	0.1516	2498.5	0.0862
M04116_2.00:MYF5:MYOD1:MYOG	BAACAGCTGTTR	1e-168	-387.3	0	1727	0.1015	1430.2	0.0493
M05076_2.00:HOXA10:HOXA11:HOXA9:HOXB9:HOXC10:HOXC11:HOXC12:HOXC9:HOXD10:HOXD11:HOXD12:HOXD9	DTTTTATKRCY	1e-167	-384.8	0	3871	0.2275	4280.4	0.1476
M04548_2.00:ZBTB26	NTTTTCTRGAKB	1e-166	-382.7	0	2826	0.1661	2838.5	0.0979
M09495_2.00:BATF:BATF3	ATGASTCATH	1e-165	-380.9	0	2152	0.1265	1963.3	0.0677
M02196_2.00:EVX1:EVX2:HOXA11:HOXC11:HOXC12:HOXD11:HOXD12	TTAATTAC	1e-164	-378.9	0	5466	0.3212	6651.3	0.2294
M05111_2.00:HOXA10:HOXA11:HOXA5:HOXA6:HOXA7:HOXA9:HOXB5:HOXB6:HOXB8:HOXB9:HOXC10:HOXC11:HOXC5:HOXC6:HOXC8:HOXC9:HOXD10:HOXD11:HOXD8:HOXD9	GTTTTATTGC	1e-163	-377.5	0	3341	0.1963	3553.1	0.1225
M09073_2.00:ELF1:ELF2:ELF4:ELK1:ELK3:ELK4:ERF:ERG:ETS1:ETS2:ETV1:ETV2:ETV3:ETV3L:ETV4:ETV5:FEV:FLI1:GABPA	CAGGAAGT	1e-163	-377.2	0	8119	0.4771	10853.1	0.3743
M04118_2.00:MYF5:MYOD1:MYOG	BAACAGCTGTYV	1e-162	-374.4	0	1697	0.0997	1414.2	0.0488
M08806_2.00:JUN:JUNB:JUND	DRTGACTCATC	1e-161	-372.7	0	1263	0.0742	917	0.0316
M10475_2.00:ELF5:SPI1:SPIB:SPIC	ACTTCCTCT	1e-161	-372.5	0	1531	0.09	1221.8	0.0421
M09596_2.00:IRF1:IRF2	GAAASYGAAASY	1e-160	-370.1	0	3296	0.1937	3509.9	0.121
M08255_2.00:ZNF519	CWCTTCCGGT	1e-159	-367	0	1357	0.0797	1029.6	0.0355
M02710_2.00:REL:RELA	GGGGMTTTCC	1e-158	-365.2	0	2118	0.1245	1949.9	0.0672
M11235_2.00:REL:RELA	GGGGMTTTCC	1e-158	-365	0	2113	0.1242	1943	0.067
M10481_2.00:ELF1:ELF2:ELF4:ELK1:ELK3:ELK4:ERF:ERG:ETS1:ETS2:ETV1:ETV2:ETV3:ETV3L:ETV4:ETV5:FEV:FLI1:GABPA	CMGGAARTR	1e-158	-364.3	0	3274	0.1924	3493.3	0.1205
M03008_2.00:SPI1:SPIB:SPIC	AAAAAGCGGAAGTA	1e-158	-364.2	0	360	0.0212	98.6	0.0034
M09827_2.00:EPAS1	ACGTGBGN	1e-156	-361.5	0	5711	0.3356	7084.3	0.2443
M04804_2.00:SPI1:SPIB:SPIC	AAWGRGGAAGTR	1e-156	-360.8	0	1207	0.0709	870.9	0.03
M03954_2.00:RELA	TGGGAWTTTCCCA	1e-155	-358.7	0	542	0.0318	228.2	0.0079
M02696_2.00:MEF2A	HWTWCCAWAWATRGAAAK	1e-155	-358.2	0	465	0.0273	170.3	0.0059
M10930_2.00:MEF2A	HWTWCCAWAWATRGAAAK	1e-155	-358.2	0	465	0.0273	170.3	0.0059
M04210_2.00:ASCL1:ASCL2	VGCAGCTGCY	1e-155	-357.6	0	2578	0.1515	2562.8	0.0884
M01000_2.00:JUN:JUNB:JUND	NATGACTCAY	1e-154	-356.6	0	1925	0.1131	1722.9	0.0594
M08232_2.00:ZNF200	ACTTCC	1e-154	-355.3	0	7796	0.4581	10411.2	0.359
M08455_2.00:RBPJ	AKYTMGKTTCCCACAV	1e-152	-351	0	474	0.0279	180.9	0.0062
M05399_2.00:HOXA10:HOXA11:HOXA6:HOXA9:HOXB6:HOXB8:HOXB9:HOXC10:HOXC11:HOXC12:HOXC6:HOXC8:HOXC9:HOXD10:HOXD11:HOXD12:HOXD8:HOXD9	GTTTTATKRCC	1e-152	-350.4	0	3484	0.2047	3823.8	0.1319
M01026_2.00:SOX1:SOX10:SOX11:SOX12:SOX13:SOX14:SOX15:SOX17:SOX18:SOX2:SOX21:SOX3:SOX30:SOX4:SOX5:SOX6:SOX7:SOX8:SOX9:SRY	AACAAAGG	1e-151	-349.3	0	6181	0.3632	7856.3	0.2709
M05768_2.00:SOX1:SOX10:SOX11:SOX12:SOX13:SOX14:SOX15:SOX17:SOX18:SOX2:SOX21:SOX3:SOX30:SOX4:SOX5:SOX6:SOX7:SOX8:SOX9:SRY	AGAACAATRG	1e-151	-349.1	0	4694	0.2758	5585.7	0.1926
M05699_2.00:NFKB1:NFKB2	MGGTRCTTCCCCB	1e-150	-346.7	0	546	0.0321	238.1	0.0082
M07838_2.00:JUN:JUNB:JUND	GRTGACTCAYC	1e-150	-346.7	0	1203	0.0707	883.4	0.0305
M05620_2.00:NR1I2:NR1I3:VDR	AAAGTTCGY	1e-150	-346	0	3227	0.1896	3474.6	0.1198
M09469_2.00:MYF5:MYF6:MYOD1:MYOG	AACAGCTG	1e-149	-344.7	0	2810	0.1651	2903.4	0.1001
M11228_2.00:NFKB1:NFKB2	GGGGATTCCC	1e-149	-344.7	0	569	0.0334	258.5	0.0089
M04898_2.00:HOXA10:HOXA11:HOXA9:HOXB9:HOXC10:HOXC11:HOXC12:HOXC9:HOXD10:HOXD11:HOXD12:HOXD9	DTTTTATKRCY	1e-149	-343.6	0	4338	0.2549	5076	0.175
M10472_2.00:ELF5:SPI1:SPIB:SPIC	NNCHTYYACTTCCTCTTTT	1e-148	-342.8	0	638	0.0375	318.3	0.011
M08797_2.00:JUN:JUNB:JUND	RRTGACTCAYC	1e-147	-340.2	0	1380	0.0811	1092.5	0.0377
M09640_2.00:SOX1:SOX10:SOX11:SOX12:SOX13:SOX14:SOX15:SOX17:SOX18:SOX2:SOX21:SOX3:SOX30:SOX4:SOX5:SOX6:SOX7:SOX8:SOX9:SRY	CCATTGTTNY	1e-147	-339.4	0	9112	0.5354	12656.3	0.4365
M10485_2.00:EHF:ELF1:ELF2:ELF3:ELF4:ELF5:ELK1:ELK3:ELK4:ERF:ERG:ETS1:ETS2:ETV1:ETV2:ETV3:ETV3L:ETV4:ETV5:ETV6:ETV7:FEV:FLI1:GABPA:SPDEF	DVCAGGAAGTGS	1e-147	-339.3	0	3684	0.2165	4138.9	0.1427
M08070_2.00:JUN:JUNB:JUND	DGRTGACTCAK	1e-147	-338.7	0	1486	0.0873	1218.6	0.042
M08062_2.00:TCF12:TCF3:TCF4	RACAGCTGSNS	1e-146	-338.4	0	2698	0.1585	2766.1	0.0954
M08819_2.00:FOS:FOSB:FOSL1:FOSL2	GRTGACTCAYCC	1e-146	-337.2	0	1126	0.0662	810.7	0.028
M01978_2.00:FOXC1:FOXC2:FOXD1:FOXD2:FOXD3:FOXD4:FOXD4L1:FOXD4L3:FOXD4L4:FOXD4L5:FOXD4L6:FOXE1:FOXG1:FOXI1:FOXI2:FOXI3:FOXJ3:FOXK2:FOXL1:FOXL2:FOXS1	GTAAACAA	1e-146	-336.8	0	3277	0.1926	3568.7	0.1231
M08805_2.00:FOS:FOSB:FOSL1:FOSL2	GRTGACTCAYYC	1e-146	-336.5	0	1333	0.0783	1043.5	0.036
M08821_2.00:FOS:FOSB:FOSL1:FOSL2	GRTGACTCAYYC	1e-146	-336.5	0	1333	0.0783	1043.5	0.036
M09831_2.00:TWIST1:TWIST2	MHACACMTGGD	1e-145	-335.1	0	5226	0.3071	6433.8	0.2219
M05700_2.00:NFKB1:NFKB2	AGGTRCTTCCCCT	1e-145	-334.6	0	590	0.0347	282.7	0.0097
M04392_2.00:SNAI2	TGCACCTGTY	1e-145	-334.6	0	1434	0.0843	1163.2	0.0401
M08846_2.00:JUN:JUNB:JUND	RTGACTCAYCC	1e-145	-334.5	0	1373	0.0807	1092.5	0.0377
M09049_2.00:EHF:ELF1:ELF2:ELF3:ELF4:ELF5:ELK1:ELK3:ELK4:ERF:ERG:ETS1:ETS2:ETV1:ETV2:ETV3:ETV3L:ETV4:ETV5:ETV6:ETV7:FEV:FLI1:GABPA:SPDEF	RAVCCGGAAGTGR	1e-144	-332.8	0	900	0.0529	576.9	0.0199
M07664_2.00:ZNF716	AATNTTNMTATTTCC	1e-144	-331.8	0	1660	0.0975	1438.9	0.0496
M09866_2.00:ARNT:ARNT2	CACGTA	1e-143	-331.5	0	5048	0.2966	6175.2	0.213
M02679_2.00:EHF:ELF1:ELF2:ELF3:ELF4:ELF5:ELK1:ELK3:ELK4:ERF:ERG:ETS1:ETS2:ETV1:ETV2:ETV3:ETV3L:ETV4:ETV5:ETV6:ETV7:FEV:FLI1:GABPA:SPDEF	CCGGAAG	1e-143	-331.4	0	5639	0.3314	7079.2	0.2441
M05083_2.00:HOXA10:HOXA11:HOXC10:HOXC11:HOXC12:HOXD10:HOXD11:HOXD12:MEOX1	GGTAATAAAAH	1e-143	-330.1	0	2425	0.1425	2419	0.0834
M08071_2.00:FOS:FOSB:FOSL1:FOSL2	RGTGACTCATV	1e-142	-327.7	0	1240	0.0729	949	0.0327
M11236_2.00:REL:RELA	GGGGAATTTCCC	1e-141	-326.6	0	1073	0.0631	765.9	0.0264
M11260_2.00:RUNX1:RUNX2:RUNX3	NNNHAACCACAGRSN	1e-141	-326.6	0	3455	0.203	3847.5	0.1327
M09869_2.00:USF1:USF2	CCACGTGH	1e-141	-326.5	0	5980	0.3514	7626.4	0.263
M03275_2.00:HOXA10:HOXA11:HOXA9:HOXB9:HOXC10:HOXC11:HOXC12:HOXC9:HOXD10:HOXD11:HOXD12:HOXD9	NTTTTATKRCY	1e-141	-325.8	0	6678	0.3924	8728.8	0.301
M08577_2.00:HSF2:HSF4	TTCTAGAA	1e-141	-325.8	0	3175	0.1866	3454.4	0.1191
M09458_2.00:TCF12:TCF3:TCF4	CARCAGCTGB	1e-141	-325.6	0	2829	0.1662	2975.7	0.1026
M09347_2.00:NFKB1:RELA:RELB	GGGGGMTTTCCM	1e-141	-325.2	0	1065	0.0626	758.1	0.0261
M09352_2.00:NFKB1:RELA:RELB	GGGGGMTTTCCM	1e-141	-325.2	0	1065	0.0626	758.1	0.0261
M07945_2.00:ELF5:SPI1:SPIB:SPIC	AAAGAGGAAGTGAAACYND	1e-141	-325.2	0	224	0.0132	37	0.0013
M03775_2.00:HOXA10:HOXA11:HOXA6:HOXA9:HOXB6:HOXB8:HOXB9:HOXC10:HOXC11:HOXC12:HOXC5:HOXC6:HOXC8:HOXC9:HOXD10:HOXD11:HOXD12:HOXD8:HOXD9	DTTTTATGTGTTTT	1e-140	-323.6	0	890	0.0523	575.4	0.0198
M09630_2.00:RUNX1:RUNX2:RUNX3	NWAACCACADNN	1e-139	-320.6	0	5389	0.3167	6733.4	0.2322
M02254_2.00:IRF5:IRF6	NAYCGAWACT	1e-138	-318.3	0	2023	0.1189	1918.2	0.0662
M08781_2.00:FOSL2	RATGACTCATYM	1e-138	-317.9	0	1216	0.0715	935.3	0.0323
M08064_2.00:FOSL2	KGRTGACTCAB	1e-138	-317.8	0	1215	0.0714	934.3	0.0322
M09535_2.00:ELF1:ELF2:ELF4:ELK1:ELK3:ELK4:ERF:ERG:ETS1:ETS2:ETV1:ETV2:ETV3:ETV3L:ETV4:ETV5:FEV:FLI1:GABPA	RACCGGAAGT	1e-137	-317.4	0	1726	0.1014	1544.2	0.0533
M03984_2.00:T:TBX19	AGGTGTGAAAT	1e-137	-316.4	0	1457	0.0856	1218.4	0.042
M09595_2.00:IRF4:IRF8	ACTGAAACCA	1e-136	-314.9	0	3885	0.2283	4500.5	0.1552
M09489_2.00:ATF3:JDP2	DATGASTCATHN	1e-136	-314.7	0	1479	0.0869	1247.3	0.043
M02965_2.00:ELF5:SPI1:SPIB:SPIC	AAAAAGCGGAAGTA	1e-136	-314	0	226	0.0133	40.5	0.0014
M11230_2.00:NFKB1:NFKB2	DGGGGAMTTTCCBN	1e-135	-312.6	0	650	0.0382	351.3	0.0121
M08967_2.00:ZBTB17	CCKCCCCTCCCCCDCCSCC	1e-135	-311.9	0	570	0.0335	280	0.0097
M01738_2.00:BHLHE40:BHLHE41	KCACGTGN	1e-135	-311.1	0	9478	0.5569	13398.1	0.462
M05792_2.00:SOX1:SOX10:SOX11:SOX12:SOX13:SOX14:SOX15:SOX17:SOX18:SOX2:SOX21:SOX3:SOX30:SOX4:SOX5:SOX6:SOX7:SOX8:SOX9:SRY	SCATTGTB	1e-134	-309.7	0	7281	0.4278	9760.3	0.3366
M05248_2.00:CDX1:CDX2:CDX4	NTTTAYGAYN	1e-134	-308.6	0	7478	0.4394	10084.9	0.3478
M04033_2.00:ATF3:JDP2	ATGACTCAY	1e-133	-307.6	0	1636	0.0961	1450.1	0.05
M08837_2.00:JUN:JUNB:JUND	RTGACTCABY	1e-133	-307.3	0	1841	0.1082	1707.3	0.0589
M05767_2.00:SOX1:SOX10:SOX11:SOX12:SOX13:SOX14:SOX15:SOX17:SOX18:SOX2:SOX21:SOX3:SOX30:SOX4:SOX5:SOX6:SOX7:SOX8:SOX9:SRY	MGAACAATRG	1e-133	-306.4	0	3558	0.2091	4052.6	0.1398
M05897_2.00:SOX1:SOX10:SOX11:SOX12:SOX13:SOX14:SOX15:SOX17:SOX18:SOX2:SOX21:SOX3:SOX30:SOX4:SOX5:SOX6:SOX7:SOX8:SOX9:SRY	AACAATRGVN	1e-133	-306.4	0	8335	0.4898	11500.2	0.3966
M10019_2.00:MAF:MAFA:MAFB:MAFG:MAFK:NRL	CRCTGACSABA	1e-132	-305	0	3218	0.1891	3571.4	0.1232
M08230_2.00:STAT1	AGTTTCRKTT	1e-131	-303.5	0	1096	0.0644	819.4	0.0283
M08803_2.00:JUN:JUNB:JUND	DVTGACTCABH	1e-131	-303.4	0	2012	0.1182	1934.6	0.0667
M07835_2.00:JUN:JUNB:JUND	GATGACTCATH	1e-131	-302.9	0	1072	0.063	793.3	0.0274
M04742_2.00:EHF:ELF1:ELF2:ELF3:ELF4:ELF5:ELK1:ELK3:ELK4:ERF:ERG:ETS1:ETS2:ETV1:ETV2:ETV3:ETV3L:ETV4:ETV5:ETV6:ETV7:FEV:FLI1:GABPA:SPDEF	AAVCAGGAAGTR	1e-130	-301.5	0	1524	0.0896	1323.2	0.0456
M05836_2.00:JUN:JUNB:JUND	ATGACTCATH	1e-130	-301.1	0	1415	0.0831	1193	0.0411
M05828_2.00:XPA	CCACCTCACAC	1e-130	-300.9	0	1487	0.0874	1279.2	0.0441
M06297_2.00:CRX:DMBX1:DPRX:GSC:GSC2:OTX1:OTX2:PITX1:PITX2:PITX3:TPRX1	VTTAATCC	1e-129	-298.5	0	4510	0.265	5477.6	0.1889
M04208_2.00:ASCL1:ASCL2	RGCAGCTGCY	1e-128	-297	0	2825	0.166	3042.2	0.1049
M10760_2.00:HMBOX1:HNF1A:HNF1B	GGGGTCAG	1e-128	-295.3	0	6117	0.3594	7962	0.2746
M08061_2.00:MYF5:MYF6:MYOD1:MYOG	RACAGCTGSNS	1e-128	-295.3	0	2847	0.1673	3077.3	0.1061
M08730_2.00:ASCL1:ASCL2	CYGCACCTGCYBCY	1e-128	-295.1	0	1787	0.105	1662.8	0.0573
M11255_2.00:RUNX1:RUNX2:RUNX3	DNTGTGGTTD	1e-127	-294.2	0	6546	0.3847	8645.2	0.2981
M08828_2.00:FOS:FOSB:FOSL1:FOSL2	GRTGACTCAYC	1e-127	-293.7	0	1425	0.0837	1216.2	0.0419
M06277_2.00:ALX1:ALX3:ALX4:ARX:BARX1:BARX2:BSX:DLX1:DLX2:DLX3:DLX4:DLX5:DLX6:DRGX:EMX1:EMX2:EN1:EN2:ESX1:EVX1:EVX2:GBX1:GBX2:GSX1:GSX2:HMX1:HMX3:HOXA1:HOXA2:HOXA3:HOXA4:HOXA5:HOXA7:HOXB1:HOXB2:HOXB3:HOXB4:HOXB5:HOXB7:HOXC4:HOXC5:HOXD1:HOXD3:HOXD4:ISX:LHX2:LHX3:LHX4:LHX9:MEOX1:MEOX2:MIXL1:MNX1:MSX1:MSX2:NANOG:NANOGP8:NKX1-1:NKX1-2:NOTO:OTP:PDX1:PHOX2A:PHOX2B:PROP1:PRRX1:PRRX2:RAX:RAX2:SEBOX:SHOX:S…	AATTTTAATG	1e-126	-291.9	0	4315	0.2536	5208.6	0.1796
M02963_2.00:EBF1	AKTCCCTDGGGAAT	1e-126	-291.3	0	345	0.0203	115.9	0.004
M09063_2.00:ELF1:ELF2:ELF4:ELK1:ELK3:ELK4:ERF:ERG:ETS1:ETS2:ETV1:ETV2:ETV3:ETV3L:ETV4:ETV5:FEV:FLI1:GABPA	RRGSAGGAAGTGRR	1e-126	-290.6	0	3121	0.1834	3474.1	0.1198
M09878_2.00:NHLH1:NHLH2	CATYTGTGC	1e-125	-289.9	0	11081	0.6511	16270	0.5611
M11306_2.00:SOX1:SOX10:SOX11:SOX12:SOX13:SOX14:SOX15:SOX17:SOX18:SOX2:SOX21:SOX3:SOX30:SOX4:SOX5:SOX6:SOX7:SOX8:SOX9:SRY	RAACAAAGGVM	1e-125	-289.4	0	5177	0.3042	6522	0.2249
M08920_2.00:SP1:SP3:SP4:SP5:SP6:SP8:SP9	CCCCSGCCCCGCCCCCYCCC	1e-125	-289.3	0	544	0.032	273.2	0.0094
M08978_2.00:SP1:SP3:SP4:SP5	CCCCSGCCCCGCCCCCYCCC	1e-125	-289.3	0	544	0.032	273.2	0.0094
M09161_2.00:HOXA10:HOXA11:HOXA5:HOXA6:HOXA7:HOXA9:HOXB5:HOXB6:HOXB8:HOXB9:HOXC10:HOXC11:HOXC5:HOXC6:HOXC8:HOXC9:HOXD10:HOXD11:HOXD8:HOXD9	TTTTATKGCH	1e-125	-289.1	0	3522	0.207	4052.8	0.1398
M08027_2.00:ELF5:SPI1:SPIB:SPIC	AAAAAGAGGAAGTGR	1e-125	-288.7	0	760	0.0447	478.6	0.0165
M08069_2.00:FOS:FOSB:FOSL1:FOSL2	DVTGASTCATB	1e-125	-288.3	0	1826	0.1073	1725.4	0.0595
M07974_2.00:POU2F2	ATATGCAAATNAR	1e-124	-286.7	0	1384	0.0813	1178.8	0.0407
M07975_2.00:POU2F2	ATATGCAAATNAR	1e-124	-286.7	0	1384	0.0813	1178.8	0.0407
M03282_2.00:HOXA10:HOXA11:HOXA5:HOXA6:HOXA7:HOXA9:HOXB5:HOXB6:HOXB8:HOXB9:HOXC10:HOXC11:HOXC5:HOXC6:HOXC8:HOXC9:HOXD10:HOXD11:HOXD8:HOXD9	TTTTATGGS	1e-124	-286.5	0	6479	0.3807	8570.5	0.2956
M02741_2.00:MEIS1:MEIS2:MEIS3:PKNOX1:PKNOX2:TGIF1:TGIF2	GGACAGGT	1e-124	-286.3	0	4213	0.2476	5075.3	0.175
M04724_2.00:EHF:ELF1:ELF2:ELF3:ELF4:ELF5:ELK1:ELK3:ELK4:ERF:ERG:ETS1:ETS2:ETV1:ETV2:ETV3:ETV3L:ETV4:ETV5:ETV6:ETV7:FEV:FLI1:GABPA:SPDEF	AAMCAGGAAGTR	1e-124	-285.8	0	1129	0.0663	880.2	0.0304
M07827_2.00:FOS:FOSB:FOSL1:FOSL2	ATGACTCACYC	1e-123	-284.2	0	1393	0.0819	1193.2	0.0411
M11259_2.00:RUNX1:RUNX2:RUNX3	HAACCACAG	1e-122	-282.9	0	5759	0.3384	7449.2	0.2569
M01477_2.00:ELF1:ELF2:ELF4:ELK1:ELK3:ELK4:ERF:ERG:ETS1:ETS2:ETV1:ETV2:ETV3:ETV3L:ETV4:ETV5:FEV:FLI1:GABPA	NRBCGGAARY	1e-122	-282.2	0	8413	0.4944	11738.3	0.4048
M11229_2.00:NFKB1:NFKB2	GGGGACTTTCCA	1e-122	-281.5	0	464	0.0273	210.4	0.0073
M05754_2.00:SOX1:SOX10:SOX11:SOX12:SOX13:SOX14:SOX15:SOX17:SOX18:SOX2:SOX21:SOX3:SOX30:SOX4:SOX5:SOX6:SOX7:SOX8:SOX9:SRY	CATTGTYC	1e-122	-281.4	0	7090	0.4166	9572.5	0.3301
M09494_2.00:FOS:FOSB:FOSL1:FOSL2	NNVTGASTCATN	1e-122	-281	0	2430	0.1428	2540.8	0.0876
M05784_2.00:SOX1:SOX10:SOX11:SOX12:SOX13:SOX14:SOX15:SOX17:SOX18:SOX2:SOX21:SOX3:SOX30:SOX4:SOX5:SOX6:SOX7:SOX8:SOX9:SRY	NCATTGTKNN	1e-121	-280.8	0	8012	0.4708	11080.1	0.3821
M09594_2.00:IRF1:IRF2	GAAAGTGAAAGT	1e-121	-279.7	0	864	0.0508	595.2	0.0205
M03247_2.00:HOXA13:HOXB13:HOXC13:HOXD13	DTTTTATTRG	1e-121	-279.5	0	4350	0.2556	5303.4	0.1829
M04839_2.00:FOXC1:FOXC2:FOXD1:FOXD2:FOXD3:FOXD4:FOXD4L1:FOXD4L3:FOXD4L4:FOXD4L5:FOXD4L6:FOXE1:FOXG1:FOXI1:FOXI2:FOXI3:FOXJ3:FOXK2:FOXL1:FOXL2:FOXS1	VACRCAAACAC	1e-120	-278.1	0	5122	0.301	6480.3	0.2235
M07815_2.00:JUN:JUNB:JUND	ATGACTCAYCC	1e-120	-277.9	0	951	0.0559	691.3	0.0238
M04530_2.00:ZNF444	CCGTCCCCCTCCCCCM	1e-120	-277.2	0	411	0.0242	170.1	0.0059
M04218_2.00:HES5	VCACACKT	1e-119	-276	0	9680	0.5688	13904.1	0.4795
M08067_2.00:JUN:JUNB:JUND	DRTGACTCATS	1e-119	-275.6	0	1086	0.0638	845.9	0.0292
M02713_2.00:RELA	GGGGWTTTCC	1e-119	-274.5	0	1325	0.0779	1127.3	0.0389
M08223_2.00:ESR1:ESR2:HNF4A:HNF4G:NR1D1:NR1D2:NR1H2:NR1H3:NR1H4:NR2C1:NR2C2:NR2F1:NR2F2:NR2F6:NR4A1:NR4A2:NR4A3:NR5A2:NR6A1:PPARA:PPARD:PPARG:RARA:RARB:RARG:RORA:RORB:RORC:RXRA:RXRB:RXRG:THRA:THRB	AAAGGTCA	1e-118	-273.9	0	5690	0.3344	7377.6	0.2544
M07826_2.00:FOS:FOSB:FOSL1:FOSL2	GATGASTCACWSN	1e-117	-271.1	0	936	0.055	683.2	0.0236
M05783_2.00:SOX1:SOX10:SOX11:SOX12:SOX13:SOX14:SOX15:SOX17:SOX18:SOX2:SOX21:SOX3:SOX30:SOX4:SOX5:SOX6:SOX7:SOX8:SOX9:SRY	NCATTGTNNG	1e-117	-271	0	8478	0.4982	11898.8	0.4103
M10479_2.00:ELF1:ELF2:ELF4:ELK1:ELK3:ELK4:ERF:ERG:ETS1:ETS2:ETV1:ETV2:ETV3:ETV3L:ETV4:ETV5:FEV:FLI1:GABPA	CTTCCTGT	1e-117	-270.9	0	5996	0.3523	7870.4	0.2714
M04718_2.00:EHF:ELF1:ELF2:ELF3:ELF4:ELF5:ELK1:ELK3:ELK4:ERF:ERG:ETS1:ETS2:ETV1:ETV2:ETV3:ETV3L:ETV4:ETV5:ETV6:ETV7:FEV:FLI1:GABPA:SPDEF	AAMCAGGAAGTR	1e-117	-270.8	0	1029	0.0605	787.6	0.0272
M08999_2.00:ZNF281	CCCCTCCCCCACCCC	1e-115	-266.9	0	683	0.0401	422.2	0.0146
M09691_2.00:RELA	BGGRTTTYCCC	1e-114	-264.6	0	2134	0.1254	2180.2	0.0752
M01496_2.00:ELF1:ELF2:ELF4:ELK1:ELK3:ELK4:ERF:ERG:ETS1:ETS2:ETV1:ETV2:ETV3:ETV3L:ETV4:ETV5:FEV:FLI1:GABPA	NASCGGAART	1e-114	-264.6	0	6123	0.3598	8097.6	0.2792
M07829_2.00:JUN:JUNB:JUND	NKRTGACTCATBCYY	1e-114	-264.3	0	807	0.0474	552.2	0.019
M05401_2.00:HOXA10:HOXA11:HOXA6:HOXA9:HOXB6:HOXB8:HOXB9:HOXC10:HOXC11:HOXC12:HOXC6:HOXC8:HOXC9:HOXD10:HOXD11:HOXD12:HOXD8:HOXD9	RTTTTATKRCV	1e-114	-263.4	0	4446	0.2613	5505.5	0.1899
M03129_2.00:HOXA13:HOXB13:HOXC13:HOXD13	DTTTTATTGG	1e-114	-263.2	0	3322	0.1952	3843.1	0.1325
M09490_2.00:FOS:FOSB:FOSL1:FOSL2	NNATGASTCATH	1e-113	-261.7	0	2382	0.14	2523.6	0.087
M07821_2.00:BATF:BATF3	TGAGTCATAWCGARA	1e-113	-261.5	0	462	0.0271	221.7	0.0076
M11311_2.00:LEF1:TCF7:TCF7L1:TCF7L2	SATCAAAGKG	1e-112	-259.8	0	4822	0.2833	6090.7	0.21
M06231_2.00:ALX1:ALX3:ALX4:ARX:BARHL1:BARHL2:BARX1:BARX2:BSX:DLX1:DLX2:DLX3:DLX4:DLX5:DLX6:DRGX:EMX1:EMX2:EN1:EN2:ESX1:EVX1:EVX2:GBX1:GBX2:GSX1:GSX2:HMX1:HMX2:HMX3:HOXA1:HOXA2:HOXA3:HOXA4:HOXA5:HOXB1:HOXB2:HOXB3:HOXB4:HOXB5:HOXC4:HOXC5:HOXD1:HOXD3:HOXD4:ISX:MEOX1:MEOX2:MIXL1:MNX1:MSX1:MSX2:NANOG:NANOGP8:NKX1-1:NKX1-2:PDX1:PHOX2A:PHOX2B:PROP1:PRRX1:PRRX2:RAX:RAX2:SEBOX:SHOX:SHOX2:UNCX:VAX1:VAX2:VE…	YTTAATKRG	1e-112	-259.2	0	5349	0.3143	6905.1	0.2381
M07817_2.00:JUN:JUNB:JUND	RTGASTCATCCYB	1e-112	-258.3	0	896	0.0527	655.8	0.0226
M00736_2.00:RBPJ	NNDTTCCCAC	1e-111	-257.7	0	10998	0.6463	16278.7	0.5614
M03237_2.00:CRX:DMBX1:DPRX:GSC:GSC2:OTX1:OTX2:PITX1:PITX2:PITX3:TPRX1	GHTAATCCBN	1e-111	-257.2	0	4865	0.2859	6166.5	0.2127
M09657_2.00:TWIST1:TWIST2	AACATRTGYBRR	1e-111	-257	0	2225	0.1307	2321.4	0.0801
M08802_2.00:FOS:FOSB:FOSL1:FOSL2	RTGACTCAB	1e-111	-256.6	0	2409	0.1416	2573.9	0.0888
M04529_2.00:ZNF444	SCGTCCCCCTCCCCCC	1e-111	-255.9	0	391	0.023	166.7	0.0057
M10833_2.00:POU2F1	TATGCAAATN	1e-110	-255.4	0	1644	0.0966	1558.8	0.0538
M07833_2.00:FOS:FOSB:FOSL1:FOSL2	GGGTGASTCAT	1e-110	-255.3	0	968	0.0569	739.7	0.0255
M03140_2.00:HOXA10:HOXA11:HOXA9:HOXB9:HOXC10:HOXC11:HOXC12:HOXC9:HOXD10:HOXD11:HOXD12:HOXD9	TTTTATKRCY	1e-110	-255	0	6083	0.3574	8075.9	0.2785
M08073_2.00:JUN:JUNB:JUND	ARRRRATGASTCAT	1e-109	-251.2	0	963	0.0566	739	0.0255
M08060_2.00:MYF5:MYOD1:MYOG	RGNRACAGCTGCN	1e-108	-250.5	0	2572	0.1511	2815.6	0.0971
M03009_2.00:ELF5:ETV7:SPI1:SPIB:SPIC	AAAAAGMGGAAGTA	1e-108	-250.1	0	277	0.0163	86.5	0.003
M06018_2.00:JUN:JUNB:JUND	RATGASTCAYC	1e-108	-248.8	0	1211	0.0712	1032.6	0.0356
M08710_2.00:TCF12:TCF3:TCF4	CACAGCTGCAG	1e-107	-247.6	0	2607	0.1532	2872.6	0.0991
M09407_2.00:LEF1:TCF7:TCF7L1:TCF7L2	CTGCAGCTGTG	1e-107	-247.6	0	2607	0.1532	2872.6	0.0991
M04207_2.00:ASCL1:ASCL2	VGCAGCTGCB	1e-107	-247.3	0	3062	0.1799	3518.8	0.1213
M04341_2.00:JUN:JUNB:JUND	KATGACTCATM	1e-107	-246.5	0	799	0.047	564.2	0.0195
M02075_2.00:HOXA2:HOXB2:HOXC12:HOXD12:MNX1	TTAATTAC	1e-106	-245.8	0	5639	0.3314	7414.4	0.2557
M10164_2.00:KLF1:KLF12:KLF2:KLF3:KLF4:KLF5:KLF6:KLF7:KLF8	CCACACCCTG	1e-106	-245.3	0	3148	0.185	3648.1	0.1258
M02991_2.00:ELF1:ERF:ETV6	MGCGGAAGTG	1e-106	-244.6	0	1061	0.0623	861.5	0.0297
M04008_2.00:NFE2:NFE2L1:NFE2L2:NFE2L3	ATGACTCAY	1e-106	-244.3	0	1121	0.0659	932.5	0.0322
M06201_2.00:FOXP1:FOXP2:FOXP3:FOXP4	RRTAAACAA	1e-104	-241.2	0	4501	0.2645	5672.9	0.1956
M10414_2.00:RBPJ	TTCCCACG	1e-104	-239.7	0	2621	0.154	2914.5	0.1005
M04777_2.00:ELF1:ELF2:ELF4:ELK1:ELK3:ELK4:ERF:ERG:ETS1:ETS2:ETV1:ETV2:ETV3:ETV3L:ETV4:ETV5:FEV:FLI1:GABPA	VACMGGAARTS	1e-103	-239.3	0	2234	0.1313	2378.4	0.082
M10534_2.00:FOXM1	WAGACTGATTA	1e-103	-238.3	0	2991	0.1758	3444.4	0.1188
M05766_2.00:SOX1:SOX10:SOX11:SOX12:SOX13:SOX14:SOX15:SOX17:SOX18:SOX2:SOX21:SOX3:SOX30:SOX4:SOX5:SOX6:SOX7:SOX8:SOX9:SRY	RAACAAAGRV	1e-103	-238.2	0	6832	0.4015	9350.7	0.3225
M04048_2.00:TFAP2A:TFAP2B:TFAP2C:TFAP2D:TFAP2E	HSCCYNMGGSN	1e-102	-236.5	0	6919	0.4066	9499.7	0.3276
M07812_2.00:FOSL2	DRTGASTCATCCTB	1e-101	-233.7	0	712	0.0418	486.6	0.0168
M09589_2.00:POU2F2	ATATGCAAAT	1e-101	-233.6	0	1288	0.0757	1152.1	0.0397
M02258_2.00:IRF9	ADCGAAACY	1e-101	-233.5	0	4730	0.2779	6053	0.2087
M05082_2.00:HOXA10:HOXA11:HOXA9:HOXB9:HOXC10:HOXC11:HOXC12:HOXC9:HOXD10:HOXD11:HOXD12:HOXD9	DTTTTATKRCN	1e-101	-232.7	0	5750	0.3379	7646.2	0.2637
M08260_2.00:ZNF467	CCYCCCCCCCYBCCCCTCCCC	1e-100	-232	0	524	0.0308	299.1	0.0103
M03135_2.00:HOXA10:HOXA11:HOXC10:HOXC11:HOXC12:HOXD10:HOXD11:HOXD12:MEOX1	TTTTATTAC	1e-100	-231.8	0	3644	0.2141	4419.4	0.1524
M08838_2.00:JUN:JUNB:JUND	RTGACTCAB	1e-100	-231.6	0	2663	0.1565	2997.4	0.1034
M10723_2.00:CDX1:CDX2:CDX4	KYCATAAATRN	1e-100	-231.5	0	6696	0.3935	9163	0.316
M00161_2.00:FOXJ1:FOXJ2	ARTAAACAAAYN	1e-100	-231.1	0	4115	0.2418	5126.4	0.1768
M03427_2.00:HNF4A:HNF4G:NR2E1	AAAAGTCAA	1e-99	-229.9	0	3053	0.1794	3560.3	0.1228
M10646_2.00:SIX1:SIX2:SIX4:SIX5	GGCTCAGGTTTCH	1e-99	-229.5	0	782	0.046	566.9	0.0196
M04763_2.00:ELF1:ELF2:ELF4:ELK1:ELK3:ELK4:ERF:ERG:ETS1:ETS2:ETV1:ETV2:ETV3:ETV3L:ETV4:ETV5:FEV:FLI1:GABPA	RACMGGAAATS	1e-99	-228.8	0	2015	0.1184	2107.2	0.0727
M02260_2.00:IRF5:IRF6	RCCGAAACYN	1e-98	-225.7	0	3408	0.2003	4092.7	0.1411
M05791_2.00:SOX1:SOX10:SOX11:SOX12:SOX13:SOX14:SOX15:SOX17:SOX18:SOX2:SOX21:SOX3:SOX30:SOX4:SOX5:SOX6:SOX7:SOX8:SOX9:SRY	VACAATGC	1e-97	-225.1	0	9692	0.5695	14180	0.489
M04725_2.00:EHF:ELF1:ELF2:ELF3:ELF4:ELF5:ELK1:ELK3:ELK4:ERF:ERG:ETS1:ETS2:ETV1:ETV2:ETV3:ETV3L:ETV4:ETV5:ETV6:ETV7:FEV:FLI1:GABPA:SPDEF	RAYGCGGAAGTR	1e-97	-224.4	0	768	0.0451	557.9	0.0192
M05372_2.00:ARGFX	YTAATCTAATTAG	1e-97	-223.7	0	321	0.0189	129.6	0.0045
M10835_2.00:POU2F1	RDRHATGCAAATYAS	1e-96	-223	0	1123	0.066	969.9	0.0334
M04759_2.00:EHF:ELF1:ELF2:ELF3:ELF4:ELF5:ETV6:ETV7:SPI1:SPIC	AASGAGGAAGTR	1e-96	-222.4	0	1395	0.082	1307.1	0.0451
M03955_2.00:RELA	KGGGAATTCCCM	1e-96	-221.2	0	336	0.0197	142.7	0.0049
M03196_2.00:CDX1:CDX2:CDX4	TTTTATKRC	1e-95	-220.2	0	5696	0.3347	7617.8	0.2627
M06472_2.00:ONECUT1:ONECUT2:ONECUT3	HAATCAA	1e-95	-220.2	0	7017	0.4123	9737.1	0.3358
M10309_2.00:MTF1	TGCGCAC	1e-95	-220.1	0	6056	0.3559	8189.3	0.2824
M05865_2.00:ELF1:ELF2:ELF4:ELK1:ELK3:ELK4:ERF:ERG:ETS1:ETS2:ETV1:ETV2:ETV3:ETV3L:ETV4:ETV5:FEV:FLI1:GABPA	ACCGGAAGTDN	1e-95	-220.1	0	1320	0.0776	1217.3	0.042
M03005_2.00:ELF5:ETV7:SPI1:SPIB:SPIC	AAAAAGMGGAAGTA	1e-95	-219.3	0	501	0.0294	288.4	0.0099
M05753_2.00:SOX1:SOX10:SOX11:SOX12:SOX13:SOX14:SOX15:SOX17:SOX18:SOX2:SOX21:SOX3:SOX30:SOX4:SOX5:SOX6:SOX7:SOX8:SOX9:SRY	SAACAATG	1e-95	-219.1	0	6895	0.4052	9544.5	0.3291
M04716_2.00:EHF:ELF1:ELF2:ELF3:ELF4:ELF5:ELK1:ELK3:ELK4:ERF:ERG:ETS1:ETS2:ETV1:ETV2:ETV3:ETV3L:ETV4:ETV5:ETV6:ETV7:FEV:FLI1:GABPA:SPDEF	NAMSCGGAAGTR	1e-94	-218.7	0	659	0.0387	447.2	0.0154
M04342_2.00:JUN:JUNB:JUND	KATGASTCATM	1e-94	-218	0	663	0.039	452.5	0.0156
M09688_2.00:HNF4A:HNF4G:NR2E1	AAAAGTCAAA	1e-94	-216.9	0	2548	0.1497	2878.6	0.0993
M10496_2.00:ELF1:ELF2:ELF4:ELK1:ELK3:ELK4:ERF:ERG:ETS1:ETS2:ETV1:ETV2:ETV3:ETV3L:ETV4:ETV5:FEV:FLI1:GABPA	AGGAAGT	1e-94	-216.8	0	8796	0.5169	12701.9	0.438
M03206_2.00:HOXA10:HOXA11:HOXC10:HOXC11:HOXC12:HOXD10:HOXD11:HOXD12:MEOX2	GTAATAAAA	1e-94	-216.7	0	3689	0.2168	4541.5	0.1566
M08932_2.00:ZNF467	CCCCCCCCCCCYYCCCCTCCCC	1e-93	-215.9	0	480	0.0282	271.5	0.0094
M09142_2.00:SIX1:SIX2:SIX4:SIX5	TGWAAYYTGATMCY	1e-93	-215.6	0	747	0.0439	545.3	0.0188
M11389_2.00:TBP:TBPL2	NCTATAAAAG	1e-93	-215.3	0	3611	0.2122	4430.2	0.1528
M09274_2.00:NR2C1:NR2C2:NR2F1:NR2F2:NR2F6:NR4A1:NR4A2:NR4A3:PPARD:PPARG:RARA:RARB:RARG:RORA:RORB:RORC:RXRA:RXRB:RXRG	AAAGGTCAV	1e-92	-213.7	0	6139	0.3607	8352.2	0.288
M08937_2.00:WT1	CYCCYCCYCCTCCCCCBCCC	1e-92	-213.6	0	535	0.0314	326.7	0.0113
M08968_2.00:WT1	CYCCYCCYCCTCCCCCBCCC	1e-92	-213.6	0	535	0.0314	326.7	0.0113
M09484_2.00:BACH1:BACH2	TGACTCAGCA	1e-91	-211.3	0	934	0.0549	763.2	0.0263
M08161_2.00:NFKB1:RELA:RELB	GRATTCCCCNN	1e-91	-209.9	0	1354	0.0796	1280.4	0.0442
M08285_2.00:ZNF184	TCCTCACCA	1e-90	-209	0	2253	0.1324	2487.5	0.0858
M07837_2.00:JUN:JUNB:JUND	RRRRRRATGASTCAT	1e-90	-208.6	0	728	0.0428	533.5	0.0184
M00249_2.00:WT1	NCTCCCCCGCN	1e-90	-208	0	1978	0.1162	2110.8	0.0728
M04719_2.00:EHF:ELF1:ELF2:ELF3:ELF4:ELF5:ELK1:ELK3:ELK4:ERF:ERG:ETS1:ETS2:ETV1:ETV2:ETV3:ETV3L:ETV4:ETV5:ETV6:ETV7:FEV:FLI1:GABPA:SPDEF	RAYGCGGAAGTR	1e-89	-207.1	0	997	0.0586	844.4	0.0291
M07721_2.00:ZNF786	CTGGGRC	1e-89	-207	0	7146	0.4199	10014.4	0.3454
M08829_2.00:BATF:BATF3	CTGAGTCATWTYGARASH	1e-89	-205.8	0	277	0.0163	105.2	0.0036
M05540_2.00:IRF4:IRF8	NYGAAACTGAAACTR	1e-89	-205.6	0	390	0.0229	197.6	0.0068
M08870_2.00:MAZ	CYCCYCYCCCHCCCCCTCCCCC	1e-88	-204.9	0	583	0.0343	383.4	0.0132
M08988_2.00:MAZ	CYCCYCYCCCHCCCCCTCCCCC	1e-88	-204.9	0	583	0.0343	383.4	0.0132
M03446_2.00:NFKB1:NFKB2	AGGGGAWTCCCCT	1e-88	-204.8	0	215	0.0126	63.5	0.0022
M08025_2.00:ZNF281	CCCCTCCCCCACCYC	1e-88	-204.7	0	826	0.0485	648.9	0.0224
M04770_2.00:ELF1:ELF2:ELF4:ELK1:ELK3:ELK4:ERF:ERG:ETS1:ETS2:ETV1:ETV2:ETV3:ETV3L:ETV4:ETV5:FEV:FLI1:GABPA	NACCGGAARTV	1e-88	-204.3	0	1138	0.0669	1020.1	0.0352
M01985_2.00:FOXC1:FOXC2:FOXD1:FOXD2:FOXD3:FOXD4:FOXD4L1:FOXD4L3:FOXD4L4:FOXD4L5:FOXD4L6:FOXE1:FOXG1:FOXI1:FOXI2:FOXI3:FOXJ3:FOXK2:FOXL1:FOXL2:FOXS1	GTAAACAA	1e-88	-204	0	3974	0.2335	5019.8	0.1731
M11205_2.00:PAX1:PAX2:PAX3:PAX5:PAX6:PAX7:PAX8:PAX9	CANTNHYGCGTGART	1e-87	-202.3	0	1185	0.0696	1082.9	0.0373
M04722_2.00:EHF:ELF1:ELF2:ELF3:ELF4:ELF5:ELK1:ELK3:ELK4:ERF:ERG:ETS1:ETS2:ETV1:ETV2:ETV3:ETV3L:ETV4:ETV5:ETV6:ETV7:FEV:FLI1:GABPA:SPDEF	NAMSCGGAAGTR	1e-87	-202	0	625	0.0367	430.2	0.0148
M08140_2.00:POU2F2	ATATGCAAATKMR	1e-87	-201.4	0	1352	0.0794	1295.6	0.0447
M03953_2.00:RELA	TGGGTTTTTCCCA	1e-87	-201.1	0	304	0.0179	128.8	0.0044
M08907_2.00:KLF15	CCCCCCCCHBCYCCTCCCC	1e-87	-201	0	580	0.0341	384.8	0.0133
M08987_2.00:KLF15	CCCCCCCCHBCYCCTCCCC	1e-87	-201	0	580	0.0341	384.8	0.0133
M00778_2.00:EGR1:EGR2:EGR3:EGR4	CGCCCACGCA	1e-87	-200.7	0	903	0.0531	743.8	0.0257
M09198_2.00:SIX1:SIX2:SIX4:SIX5	WGAAACCTGASACC	1e-87	-200.4	0	923	0.0542	767.6	0.0265
M09077_2.00:EHF:ELF1:ELF2:ELF3:ELF4:ELF5:ETV6:ETV7	RCAGGAARK	1e-86	-200.1	0	8022	0.4714	11495.1	0.3964
M04136_2.00:ASCL1:ASCL2	RGCAGCTGCH	1e-86	-199.8	0	3228	0.1897	3919.2	0.1352
M10280_2.00:EGR1:EGR2:EGR3:EGR4	GTGGGT	1e-86	-199.6	0	9362	0.5501	13754.1	0.4743
M11428_2.00:POU2AF1	ATATGCAAATC	1e-86	-198.4	0	1014	0.0596	879.3	0.0303
M11134_2.00:NR2C1:NR2C2:NR2F1:NR2F2:NR2F6:NR4A1:NR4A2:NR4A3:PPARD:PPARG:RARA:RARB:RARG:RORA:RORB:RORC:RXRA:RXRB:RXRG	BTGACCTTBB	1e-86	-198.2	0	3727	0.219	4669.5	0.161
M01491_2.00:EHF:ELF1:ELF2:ELF3:ELF4:ELF5:ETV6:ETV7	DNSCGGAART	1e-85	-197.9	0	6657	0.3912	9265.7	0.3195
M05585_2.00:HNF4A:HNF4G:NR2E1	MRAAGTCAM	1e-85	-196.7	0	6321	0.3714	8728.2	0.301
M04792_2.00:EHF:ELF1:ELF2:ELF4:ELK1:ELK3:ELK4:ERF:ERG:ETS1:ETS2:ETV1:ETV2:ETV3:ETV3L:ETV4:ETV5:FEV:FLI1:GABPA	RACCGGAAGTG	1e-85	-196.6	0	980	0.0576	841.1	0.029
M10253_2.00:SP2	GNGGGGGGCGGGGCS	1e-85	-196.5	0	722	0.0424	542.8	0.0187
M01301_2.00:PAX1:PAX2:PAX3:PAX5:PAX6:PAX7:PAX8:PAX9	HSCGTGACB	1e-85	-195.9	0	7327	0.4305	10369.9	0.3576
M02689_2.00:PAX2:PAX4:PAX6	TTCACGCWTGANTT	1e-84	-195.5	0	244	0.0143	86.1	0.003
M02751_2.00:RUNX1:RUNX2:RUNX3	AACCRCAA	1e-84	-195.5	0	4228	0.2484	5441.8	0.1877
M02678_2.00:SPI1:SPIB:SPIC	AGAGGAA	1e-84	-195.2	0	9816	0.5768	14555.6	0.502
M02988_2.00:EHF:ELF1:ELF2:ELF3:ELF4:ELF5:ETV6:ETV7:SPI1:SPIC	ACCCGGAAGTD	1e-84	-194.4	0	1289	0.0757	1229.6	0.0424
M07828_2.00:FOS:FOSB:FOSL1:FOSL2	BKRTGACTCATCCYY	1e-84	-193.6	0	599	0.0352	412.1	0.0142
M03050_2.00:FOXO1:FOXO3:FOXO4:FOXO6:FOXP4	GTAAACA	1e-83	-193.1	0	4145	0.2436	5324.3	0.1836
M08740_2.00:MITF:TFE3:TFEB:TFEC	TCACGTGACC	1e-83	-192.4	0	863	0.0507	709.2	0.0245
M04774_2.00:ELF1:ELF2:ELF4:ELK1:ELK3:ELK4:ERF:ERG:ETS1:ETS2:ETV1:ETV2:ETV3:ETV3L:ETV4:ETV5:FEV:FLI1:GABPA	NACCGGAARTS	1e-83	-192.2	0	680	0.04	501.6	0.0173
M08105_2.00:RBPJ	NNTTCCCASV	1e-83	-191.9	0	5925	0.3482	8117.9	0.28
M04799_2.00:ELF1:ELF2:ELF4:ELK1:ELK3:ELK4:ERF:ERG:ETS1:ETS2:ETV1:ETV2:ETV3:ETV3L:ETV4:ETV5:FEV:FLI1:GABPA	RACCGGAAGTR	1e-83	-191.7	0	827	0.0486	668.1	0.023
M08893_2.00:VEZF1	CCCCTCCCCCTCCCCCCTCCCC	1e-82	-190.7	0	550	0.0323	364.7	0.0126
M08799_2.00:BATF:BATF3	MTGAGTCATAHYGAAAST	1e-82	-190.4	0	219	0.0129	71.4	0.0025
M08794_2.00:BATF:BATF3	KASTCATAATGAAASTV	1e-82	-188.9	0	289	0.017	123.5	0.0043
M08826_2.00:BATF:BATF3	KASTCATAATGAAASTV	1e-82	-188.9	0	289	0.017	123.5	0.0043
M10890_2.00:IRF4:IRF8	RAARTGAAACTG	1e-81	-188	0	511	0.03	327.7	0.0113
M04968_2.00:BARX1:BARX2:BSX:EMX1:EMX2:EN1:EN2:EVX1:EVX2:GBX1:GBX2:GSX1:GSX2:HMX1:HMX2:HMX3:HOXA1:HOXA2:HOXA3:HOXA4:HOXA5:HOXA6:HOXA7:HOXA9:HOXB1:HOXB2:HOXB3:HOXB4:HOXB5:HOXB6:HOXB7:HOXB8:HOXB9:HOXC4:HOXC5:HOXC6:HOXC8:HOXC9:HOXD1:HOXD3:HOXD4:HOXD8:HOXD9:ISX:MEOX1:MEOX2:MNX1:NKX1-1:NKX1-2:NOTO:OTP:PDX1:VAX1:VAX2:VENTX	STAATTAC	1e-81	-187.7	0	5162	0.3033	6927.6	0.2389
M04721_2.00:ELF1:ELF2:ELF4:ELK1:ELK3:ELK4:ERF:ERG:ETS1:ETS2:ETV1:ETV2:ETV3:ETV3L:ETV4:ETV5:FEV:FLI1:GABPA	RACAGGAAGTG	1e-81	-187.1	0	1683	0.0989	1764.1	0.0608
M04743_2.00:EHF:ELF1:ELF2:ELF3:ELF4:ELF5:ELK1:ELK3:ELK4:ERF:ERG:ETS1:ETS2:ETV1:ETV2:ETV3:ETV3L:ETV4:ETV5:ETV6:ETV7:FEV:FLI1:GABPA:SPDEF	RABSCGGAAGTG	1e-81	-187	0	1319	0.0775	1283.6	0.0443
M03314_2.00:POU3F2	WTATGCWAATTA	1e-81	-186.9	0	1131	0.0665	1044.1	0.036
M00738_2.00:RBPJ	KTTCCCAY	1e-80	-186.1	0	12230	0.7187	18849.2	0.65
M06139_2.00:SCRT1:SCRT2	CACCTGTTG	1e-80	-185.4	0	1699	0.0998	1790	0.0617
M09149_2.00:HOXA13:HOXB13:HOXC13:HOXD13	TTTTATDGGY	1e-80	-185.1	0	4267	0.2507	5546.3	0.1913
M04291_2.00:ATF3:JDP2	NRTGASTCAYN	1e-79	-184.1	0	2063	0.1212	2294.3	0.0791
M10474_2.00:ELF5:SPI1:SPIB:SPIC	AAAAWGVGGAAGTRGNG	1e-79	-183.8	0	396	0.0233	219	0.0076
M04135_2.00:ASCL1:ASCL2	VGCAGCTGCN	1e-79	-182.5	0	3033	0.1782	3696	0.1275
M08267_2.00:ZNF71	CAGTTTCRTTTTCC	1e-79	-182.3	0	374	0.022	200.5	0.0069
M04767_2.00:ELF1:ELF2:ELF4:ELK1:ELK3:ELK4:ERF:ERG:ETS1:ETS2:ETV1:ETV2:ETV3:ETV3L:ETV4:ETV5:FEV:FLI1:GABPA	GACCGGAAGTV	1e-78	-181.5	0	988	0.0581	877.3	0.0303
M09060_2.00:EHF:ELF1:ELF2:ELF3:ELF4:ELF5:ETV6:ETV7	RAACVAGGAAGTRG	1e-78	-181.4	0	1120	0.0658	1041.4	0.0359
M09066_2.00:EHF:ELF1:ELF2:ELF3:ELF4:ELF5:ETV6:ETV7	RAACVAGGAAGTRG	1e-78	-181.4	0	1120	0.0658	1041.4	0.0359
M02985_2.00:ELF1:ELF2:ELF4:ELK1:ELK3:ELK4:ERF:ERG:ETS1:ETS2:ETV1:ETV2:ETV3:ETV3L:ETV4:ETV5:FEV:FLI1:GABPA	ACCGGAARTV	1e-78	-181.3	0	1096	0.0644	1011.3	0.0349
M05841_2.00:JUN:JUNB:JUND	GATGACTCATM	1e-78	-181.3	0	594	0.0349	421.1	0.0145
M05546_2.00:IRF1:IRF2	CGAAAGYGAAAS	1e-78	-180.7	0	798	0.0469	651.7	0.0225
M03815_2.00:ALX1:ALX3:ALX4:ARX:BARHL1:BARHL2:DRGX:ESX1:EVX1:EVX2:GBX1:GBX2:HESX1:LBX1:LBX2:MEOX1:MEOX2:MIXL1:MSX1:MSX2:PHOX2A:PHOX2B:PROP1:PRRX1:PRRX2:RAX:RAX2:SHOX:SHOX2:TLX1:TLX3:UNCX:VSX1:VSX2	NTAATTAG	1e-78	-180.5	0	6095	0.3582	8448.7	0.2914
M09791_2.00:TCF12:TCF3:TCF4	RGCAGGTGBCG	1e-77	-179.2	0	2273	0.1336	2605.5	0.0899
M04768_2.00:ELF1:ELF2:ELF4:ELK1:ELK3:ELK4:ERF:ERG:ETS1:ETS2:ETV1:ETV2:ETV3:ETV3L:ETV4:ETV5:FEV:FLI1:GABPA	NACCGGAAGTR	1e-77	-178.8	0	683	0.0401	522.9	0.018
M02983_2.00:ELF1:ELF2:ELF4:ELK1:ELK3:ELK4:ERF:ERG:ETS1:ETS2:ETV1:ETV2:ETV3:ETV3L:ETV4:ETV5:FEV:FLI1:GABPA	ACCGGAAGTR	1e-77	-178	0	864	0.0508	733.1	0.0253
M05864_2.00:ELF1:ELF2:ELF4:ELK1:ELK3:ELK4:ERF:ERG:ETS1:ETS2:ETV1:ETV2:ETV3:ETV3L:ETV4:ETV5:FEV:FLI1:GABPA	ACCGGAARTR	1e-77	-177.9	0	1299	0.0763	1277.9	0.0441
M09881_2.00:MITF:TFE3:TFEB:TFEC	CATGTGA	1e-77	-177.9	0	9566	0.5621	14227.4	0.4906
M01984_2.00:FOXC1:FOXC2:FOXD1:FOXD2:FOXD3:FOXD4:FOXD4L1:FOXD4L3:FOXD4L4:FOXD4L5:FOXD4L6:FOXE1:FOXE3:FOXF1:FOXF2:FOXG1:FOXI1:FOXI3:FOXL1:FOXL2:FOXS1	NATRTAAACAHA	1e-77	-177.8	0	4173	0.2452	5434.9	0.1874
M10254_2.00:SP2	YYGGCCCCGCCCCCC	1e-77	-177.4	0	597	0.0351	429.4	0.0148
M04684_2.00:DMRT1:DMRT2:DMRT3:DMRTA2:DMRTB1:DMRTC2	NATGTAGCRATT	1e-76	-177.2	0	2106	0.1238	2376	0.0819
M02836_2.00:ATF3:JDP2	ATGASTCAT	1e-76	-176.6	0	461	0.0271	288.9	0.01
M02838_2.00:ATF3:JDP2	ATGACTCAT	1e-76	-176.6	0	461	0.0271	288.9	0.01
M02861_2.00:ATF3:JDP2	ATGACTCAT	1e-76	-176.6	0	461	0.0271	288.9	0.01
M04287_2.00:ATF3:JDP2	GATGASTCATC	1e-76	-176.6	0	461	0.0271	288.9	0.01
M08112_2.00:ELF1:ELF2:ELF4:ELK1:ELK3:ELK4:ERF:ERG:ETS1:ETS2:ETV1:ETV2:ETV3:ETV3L:ETV4:ETV5:FEV:FLI1:GABPA	RCCGGAAGTGG	1e-76	-176.3	0	636	0.0374	473.3	0.0163
M05370_2.00:ARGFX	TTAATYTAATTAR	1e-76	-175.5	0	336	0.0197	171.4	0.0059
M08906_2.00:ZNF281	BCCCCTCCCCCACCC	1e-75	-174.5	0	839	0.0493	709.3	0.0245
M09631_2.00:RUNX1:RUNX2:RUNX3	ACCACATCCTGY	1e-75	-174.3	0	394	0.0232	225.3	0.0078
M02259_2.00:IRF5:IRF6	NAYCGAWACY	1e-75	-174.1	0	4098	0.2408	5335.3	0.184
M05586_2.00:HNF4A:HNF4G:NR2E1	ADAAGTCAM	1e-75	-174.1	0	6984	0.4104	9926.9	0.3423
M04708_2.00:ELF1:ELF2:ELF4:ELK1:ELK3:ELK4:ERF:ERG:ETS1:ETS2:ETV1:ETV2:ETV3:ETV3L:ETV4:ETV5:FEV:FLI1:GABPA	NRCCGGAWGYN	1e-75	-173.8	0	1360	0.0799	1366.5	0.0471
M09553_2.00:GATA1:GATA2:GATA3:GATA4:GATA5:GATA6	NNNNNBAGATAWYATCTVHN	1e-75	-173.2	0	949	0.0558	844.2	0.0291
M05545_2.00:IRF1:IRF2	CGAAASYGAAAS	1e-75	-173.2	0	1037	0.0609	953.9	0.0329
M05232_2.00:CRX:DMBX1:DPRX:GSC:GSC2:OTX1:OTX2:PITX1:PITX2:PITX3:TPRX1	YTAATCCC	1e-75	-172.9	0	4171	0.2451	5453.1	0.1881
M05892_2.00:SOX1:SOX10:SOX11:SOX12:SOX13:SOX14:SOX15:SOX17:SOX18:SOX2:SOX21:SOX3:SOX30:SOX4:SOX5:SOX6:SOX7:SOX8:SOX9:SRY	WAACAATRGV	1e-75	-172.8	0	4403	0.2587	5812.3	0.2004
M10522_2.00:FOXP3	ATAAACAA	1e-74	-172.6	0	5778	0.3395	7981.2	0.2752
M09809_2.00:HIF1A	GCACGT	1e-74	-171.6	0	5349	0.3143	7302.9	0.2518
M00740_2.00:RBPJ	HDGTTCCCAC	1e-74	-171.3	0	7854	0.4615	11378.1	0.3924
M00372_2.00:NR2E3	AAAGATCA	1e-74	-171	0	692	0.0407	543.5	0.0187
M03364_2.00:HNF4A:HNF4G:NR2E1	AAAAGTCAA	1e-74	-170.5	0	2801	0.1646	3398.5	0.1172
M01482_2.00:ELF1:ELF2:ELF4:ELK1:ELK3:ELK4:ERF:ERG:ETS1:ETS2:ETV1:ETV2:ETV3:ETV3L:ETV4:ETV5:FEV:FLI1:GABPA	ACCGGAAGT	1e-74	-170.4	0	1156	0.0679	1109.2	0.0383
M00421_2.00:HOXA10:HOXA11:HOXA6:HOXA9:HOXB6:HOXB8:HOXB9:HOXC10:HOXC11:HOXC12:HOXC6:HOXC8:HOXC9:HOXD10:HOXD11:HOXD12:HOXD8:HOXD9	TTAATGAC	1e-73	-170.2	0	6310	0.3708	8850.1	0.3052
M04340_2.00:JUN:JUNB:JUND	GATGACKCATM	1e-73	-170	0	932	0.0548	829.3	0.0286
M01802_2.00:XBP1	NHNACGTRD	1e-73	-170	0	6488	0.3812	9140.2	0.3152
M01492_2.00:EHF:ELF1:ELF2:ELF3:ELF4:ELF5:ELK1:ELK3:ELK4:ERF:ERG:ETS1:ETS2:ETV1:ETV2:ETV3:ETV3L:ETV4:ETV5:ETV6:ETV7:FEV:FLI1:GABPA:SPDEF	DNCCGGAAGT	1e-73	-169.8	0	6039	0.3549	8415.7	0.2902
M07820_2.00:JUN:JUNB:JUND	KGATGACTCATNCYY	1e-73	-169.3	0	534	0.0314	371.8	0.0128
M04509_2.00:ZNF281	GCCCCTCCCCCA	1e-73	-169.3	0	651	0.0383	499.3	0.0172
M03805_2.00:ALX1:ALX3:ALX4:ARX:BARX1:BARX2:BSX:DLX1:DLX2:DLX3:DLX4:DLX5:DLX6:DRGX:EMX1:EMX2:EN1:EN2:ESX1:EVX1:EVX2:GBX1:GBX2:GSX1:GSX2:HMX1:HMX3:HOXA1:HOXA2:HOXA3:HOXA4:HOXA5:HOXA7:HOXB1:HOXB2:HOXB3:HOXB4:HOXB5:HOXB7:HOXC4:HOXC5:HOXD1:HOXD3:HOXD4:ISX:LHX2:LHX3:LHX4:LHX9:MEOX1:MEOX2:MIXL1:MNX1:MSX1:MSX2:NANOG:NANOGP8:NKX1-1:NKX1-2:NOTO:OTP:PDX1:PHOX2A:PHOX2B:PROP1:PRRX1:PRRX2:RAX:RAX2:SEBOX:SHOX:S…	STAATGAC	1e-73	-168.6	0	6729	0.3954	9540.5	0.329
M11256_2.00:RUNX1:RUNX2:RUNX3	AACCACAV	1e-73	-168.6	0	7191	0.4226	10297.1	0.3551
M11132_2.00:NR2C1:NR2C2:NR2F1:NR2F2:NR2F6:NR4A1:NR4A2:NR4A3:PPARD:PPARG:RARA:RARB:RARG:RORA:RORB:RORC:RXRA:RXRB:RXRG	RAAGGTCAVG	1e-72	-167.5	0	2006	0.1179	2265	0.0781
M07814_2.00:JUN:JUNB:JUND	DMTGASTCATWTYGARANT	1e-72	-167.2	0	202	0.0119	69.1	0.0024
M04267_2.00:NFE2:NFE2L1:NFE2L2:NFE2L3	VATGASTCATB	1e-72	-166.8	0	874	0.0514	764.4	0.0264
M02395_2.00:AR:NR3C1:NR3C2:PGR	HGRGWACAT	1e-71	-165.8	0	11713	0.6883	18043.6	0.6222
M04169_2.00:ATOH1	AMCATATGKC	1e-71	-165.8	0	1062	0.0624	999.2	0.0345
M04510_2.00:ZNF281	GCCCCTCCCCCG	1e-71	-165.4	0	926	0.0544	830.8	0.0286
M04720_2.00:ELF1:ELF2:ELF4:ELK1:ELK3:ELK4:ERF:ERG:ETS1:ETS2:ETV1:ETV2:ETV3:ETV3L:ETV4:ETV5:FEV:FLI1:GABPA	NACCGGAAGTR	1e-71	-165.3	0	623	0.0366	473.7	0.0163
M01976_2.00:FOXC2:FOXJ3:FOXK2:FOXP1:FOXP2:FOXP3:FOXP4	GTAAACAA	1e-71	-165.1	0	3979	0.2338	5193.4	0.1791
M01485_2.00:ELF1:ELF2:ELF4:ELK1:ELK3:ELK4:ERF:ERG:ETS1:ETS2:ETV1:ETV2:ETV3:ETV3L:ETV4:ETV5:FEV:FLI1:GABPA	ACCGGAAGT	1e-71	-164.5	0	1441	0.0847	1496	0.0516
M09075_2.00:ELF1:ELF2:ELF4:ELK1:ELK3:ELK4:ERF:ERG:ETS1:ETS2:ETV1:ETV2:ETV3:ETV3L:ETV4:ETV5:FEV:FLI1:GABPA	GRRCCGGAAGYGG	1e-71	-164.5	0	805	0.0473	685.1	0.0236
M04732_2.00:ELF1:ELF2:ELF4:ELK1:ELK3:ELK4:ERF:ERG:ETS1:ETS2:ETV1:ETV2:ETV3:ETV3L:ETV4:ETV5:FEV:FLI1:GABPA	NRCCGGAAGTR	1e-71	-164.2	0	658	0.0387	514.9	0.0178
M01487_2.00:ELF1:ELF2:ELF4:ELK1:ELK3:ELK4:ERF:ERG:ETS1:ETS2:ETV1:ETV2:ETV3:ETV3L:ETV4:ETV5:FEV:FLI1:GABPA	NACCGGAAGT	1e-70	-163.4	0	1311	0.077	1326.6	0.0457
M08019_2.00:STAT2	TTHAGTTTCRKTTTC	1e-70	-162.5	0	442	0.026	283.1	0.0098
M08607_2.00:CIC:SOX1:SOX10:SOX11:SOX12:SOX13:SOX14:SOX15:SOX17:SOX18:SOX2:SOX21:SOX3:SOX4:SOX5:SOX6:SOX7:SOX8:SOX9:SRY	BTATTGTB	1e-70	-161.4	0	8896	0.5227	13187.3	0.4548
M00157_2.00:ELF1:ELF2:ELF4:ELK1:ELK3:ELK4:ERF:ERG:ETS1:ETS2:ETV1:ETV2:ETV3:ETV3L:ETV4:ETV5:FEV:FLI1:GABPA	NACCGGAAGT	1e-69	-160.8	0	1035	0.0608	975.3	0.0336
M06198_2.00:FOXO1:FOXO3:FOXO4:FOXO6	TCRTAAACA	1e-69	-159.5	0	5212	0.3063	7148.9	0.2465
M02750_2.00:RFX1:RFX2:RFX3:RFX4:RFX6	GTTRCCATGG	1e-69	-158.9	0	783	0.046	668.1	0.023
M03004_2.00:EHF:ELF1:ELF2:ELF4:ELK1:ELK3:ELK4:ERF:ERG:ETS1:ETS2:ETV1:ETV2:ETV3:ETV3L:ETV4:ETV5:FEV:FLI1:GABPA	ACCGGAAGTN	1e-68	-157.6	0	602	0.0354	460	0.0159
M07978_2.00:IRF4:IRF8	ANTSHGGAAMTGAVWCAD	1e-68	-157.5	0	692	0.0407	563.9	0.0194
M04037_2.00:JUN:JUNB:JUND	ATGACKCAY	1e-68	-157.2	0	1971	0.1158	2247.3	0.0775
M10849_2.00:POU3F1	GRGGAATTAVAVTDS	1e-68	-157.1	0	1424	0.0837	1492.1	0.0515
M03218_2.00:ALX1:ALX3:ALX4:ARX:BARX1:BARX2:BSX:DLX1:DLX2:DLX3:DLX4:DLX5:DLX6:DRGX:EN1:EN2:ESX1:GBX1:GBX2:GSX1:GSX2:HESX1:HOXA1:HOXA2:HOXA3:HOXA4:HOXA5:HOXB1:HOXB2:HOXB3:HOXB4:HOXB5:HOXC4:HOXC5:HOXD3:HOXD4:ISX:LBX2:LHX1:LHX2:LHX3:LHX4:LHX5:LHX6:LHX8:LHX9:LMX1A:LMX1B:MEOX1:MIXL1:MNX1:MSX1:MSX2:NKX1-1:NKX1-2:NOBOX:NOTO:OTP:PDX1:PHOX2A:PHOX2B:PROP1:PRRX1:PRRX2:RAX:RAX2:SEBOX:SHOX:SHOX2:UNCX:VAX1:VAX2…	YTAATTAGATTAR	1e-68	-156.8	0	339	0.0199	188.5	0.0065
M10893_2.00:IRF1:IRF2	DNGAAAGTGAAAGYRA	1e-68	-156.7	0	780	0.0458	668.8	0.0231
M02144_2.00:CRX:DMBX1:DPRX:GSC:GSC2:OTX1:OTX2:PITX1:PITX2:PITX3:TPRX1	VTTAATCCYH	1e-67	-154.8	0	4111	0.2416	5445.8	0.1878
M01479_2.00:ELF1:ELF2:ELF4:ELK1:ELK3:ELK4:ERF:ERG:ETS1:ETS2:ETV1:ETV2:ETV3:ETV3L:ETV4:ETV5:FEV:FLI1:GABPA	NACCGGAAGT	1e-66	-153.9	0	903	0.0531	823	0.0284
M03545_2.00:SOX1:SOX10:SOX11:SOX12:SOX13:SOX14:SOX15:SOX17:SOX18:SOX2:SOX21:SOX3:SOX30:SOX4:SOX5:SOX6:SOX7:SOX8:SOX9:SRY	TGAATRDHTATTCA	1e-66	-153.8	0	251	0.0147	114	0.0039
M03717_2.00:ONECUT1:ONECUT2:ONECUT3	DTTATTGATTTTT	1e-66	-153.1	0	789	0.0464	685.3	0.0236
M02992_2.00:ELF1:ELF2:ELF4:ELK1:ELK3:ELK4:ERF:ERG:ETS1:ETS2:ETV1:ETV2:ETV3:ETV3L:ETV4:ETV5:FEV:FLI1:GABPA	ACCGGAARTV	1e-66	-153	0	778	0.0457	672.4	0.0232
M09054_2.00:EHF:ELF1:ELF2:ELF3:ELF4:ELF5:ETV6:ETV7:SPI1:SPIC	GGAASSAGGAAGTGR	1e-66	-152.7	0	918	0.0539	844	0.0291
M09094_2.00:FOXI1:FOXJ3:FOXK1:FOXK2	AADGTAAACA	1e-66	-152	0	6362	0.3738	9038.9	0.3117
M05898_2.00:SOX1:SOX10:SOX11:SOX12:SOX13:SOX14:SOX15:SOX17:SOX18:SOX2:SOX21:SOX3:SOX30:SOX4:SOX5:SOX6:SOX7:SOX8:SOX9:SRY	AACAATRG	1e-65	-152	0	9115	0.5356	13618.6	0.4696
M10189_2.00:EGR1:EGR2:EGR3:EGR4	TGCGTGGGCGK	1e-65	-151.9	0	465	0.0273	318.6	0.011
M02989_2.00:EHF:ELF1:ELF2:ELF3:ELF4:ELF5:ETV6:ETV7:SPI1:SPIC	ACCCGGAAGTD	1e-65	-151.9	0	1577	0.0927	1714.9	0.0591
M07805_2.00:TCF12:TCF3:TCF4	RSAGCAGCTGB	1e-65	-151.2	0	3009	0.1768	3782	0.1304
M04757_2.00:EHF:ELF1:ELF2:ELF3:ELF4:ELF5:ETV6:ETV7:SPI1:SPIC	AACVAGGAAGTR	1e-65	-151.1	0	1533	0.0901	1656.9	0.0571
M06200_2.00:FOXD1:FOXD2:FOXD3:FOXD4:FOXD4L1:FOXD4L3:FOXD4L4:FOXD4L5:FOXD4L6:FOXE1:FOXF1:FOXF2:FOXL1	RTAAACA	1e-65	-150.2	0	4448	0.2614	5992.8	0.2067
M09185_2.00:SIX1:SIX2:SIX4:SIX5	TGAAAYYTGAKMCY	1e-65	-150.2	0	839	0.0493	752	0.0259
M09807_2.00:HIF1A	GCACGTNB	1e-65	-150	0	5501	0.3232	7660.3	0.2642
M09546_2.00:FOXH1	SSAATCCACANN	1e-64	-149.5	0	2469	0.1451	2990.9	0.1031
M00776_2.00:EGR1:EGR2:EGR3:EGR4	MCGCCCACGC	1e-64	-148.2	0	2301	0.1352	2750.2	0.0948
M10245_2.00:ZNF219	CRCCCCCCYCCC	1e-64	-148.1	0	945	0.0555	887.7	0.0306
M10819_2.00:POU2F2	NDAWATGCAAATYA	1e-64	-147.9	0	1525	0.0896	1654.3	0.0571
M09993_2.00:CEBPA:CEBPB:CEBPE	RDRTTDTGMAATVK	1e-64	-147.6	0	3238	0.1903	4142.9	0.1429
M04769_2.00:ELF1:ELF2:ELF4:ELK1:ELK3:ELK4:ERF:ERG:ETS1:ETS2:ETV1:ETV2:ETV3:ETV3L:ETV4:ETV5:FEV:FLI1:GABPA	RACCGGAAGTN	1e-64	-147.4	0	838	0.0492	755.3	0.026
M04024_2.00:NFE2:NFE2L1:NFE2L2:NFE2L3	ATGACTCAT	1e-63	-146.9	0	556	0.0327	423.8	0.0146
M09990_2.00:FOS:FOSB:FOSL1:FOSL2	RTGASTCAY	1e-63	-146.9	0	556	0.0327	423.8	0.0146
M11349_2.00:STAT1	CAHTTCCS	1e-63	-146.7	0	5877	0.3453	8283.9	0.2857
M10612_2.00:TFCP2:UBP1	CHKCCCAGCCAC	1e-63	-146.1	0	4662	0.2739	6350	0.219
M04201_2.00:NEUROG1	RVCATATGBY	1e-63	-145.6	0	1007	0.0592	971.9	0.0335
M04289_2.00:ATF3:JDP2	VATGASTCATS	1e-63	-145.2	0	1308	0.0769	1367.9	0.0472
M06429_2.00:HNF4A:HNF4G:NR2E1:NR2F1:NR2F2:NR2F6:NR6A1:RXRB	GGGGTCAA	1e-63	-145.1	0	2834	0.1665	3546.6	0.1223
M10520_2.00:ELF1:ELF2:ELF4:ELK1:ELK3:ELK4:ERF:ERG:ETS1:ETS2:ETV1:ETV2:ETV3:ETV3L:ETV4:ETV5:FEV:FLI1:GABPA	CMGGAAGC	1e-62	-144.9	0	2653	0.1559	3278.2	0.1131
M09097_2.00:FOXO4	ARTAAACAA	1e-62	-144.9	0	5246	0.3083	7281.9	0.2511
M09107_2.00:FOXO1:FOXO3:FOXO4:FOXO6	ARTAAACAA	1e-62	-144.9	0	5246	0.3083	7281.9	0.2511
M08323_2.00:KLF15	CCCCBGCYCCGCCCC	1e-62	-144.8	0	884	0.0519	817.9	0.0282
M04711_2.00:ELF1:ELF2:ELF4:ELK1:ELK3:ELK4:ERF:ERG:ETS1:ETS2:ETV1:ETV2:ETV3:ETV3L:ETV4:ETV5:FEV:FLI1:GABPA	DACCGGAAGTD	1e-62	-144.6	0	586	0.0344	460.5	0.0159
M08188_2.00:ATF3:JDP2	GATGASTCAY	1e-62	-143.9	0	571	0.0336	444.8	0.0153
M05542_2.00:IRF4:IRF8	NCGAAACYGAAACYR	1e-62	-143.8	0	267	0.0157	133.4	0.0046
M03007_2.00:ELF1:ELF2:ELF4:ELK1:ELK3:ELK4:ERF:ERG:ETS1:ETS2:ETV1:ETV2:ETV3:ETV3L:ETV4:ETV5:FEV:FLI1:GABPA	ACCGGAAGTN	1e-62	-143.2	0	922	0.0542	868.2	0.0299
M01980_2.00:FOXI1:FOXI2:FOXI3:FOXJ1:FOXJ2:FOXJ3:FOXK2:FOXP3	RTAAACAA	1e-61	-142.5	0	4202	0.2469	5647.1	0.1947
M05357_2.00:SIX3:SIX6	NRYGATACGB	1e-61	-142.5	0	3960	0.2327	5271.5	0.1818
M06319_2.00:CRX:DMBX1:DPRX:GSC:GSC2:OTX1:OTX2:PITX1:PITX2:PITX3:TPRX1	TTAATCC	1e-61	-142.4	0	3913	0.2299	5199.4	0.1793
M06521_2.00:CRX:DMBX1:DPRX:GSC:GSC2:OTX1:OTX2:PITX1:PITX2:PITX3:TPRX1	TTAATCC	1e-61	-142.4	0	3913	0.2299	5199.4	0.1793
M09468_2.00:NPAS2	GTCACGTGGM	1e-61	-142.2	0	2038	0.1198	2392.2	0.0825
M10165_2.00:SP1:SP3:SP4:SP8:SP9	SCCCCKCCCCCGS	1e-61	-142.1	0	944	0.0555	898	0.031
M08744_2.00:ASCL1:ASCL2	AGCAGCTGB	1e-61	-141	0	3117	0.1832	3988.7	0.1376
M04735_2.00:ELF1:ELF2:ELF4:ELK1:ELK3:ELK4:ERF:ERG:ETS1:ETS2:ETV1:ETV2:ETV3:ETV3L:ETV4:ETV5:FEV:FLI1:GABPA	VACCGGAAGTN	1e-61	-140.8	0	628	0.0369	514.6	0.0177
M00146_2.00:ZBTB12	NGTTCTAGAY	1e-61	-140.5	0	3216	0.189	4140.9	0.1428
M11262_2.00:RUNX1:RUNX2:RUNX3	TGTGGT	1e-60	-139.4	0	8993	0.5284	13493.5	0.4653
M10447_2.00:E2F1:E2F2:E2F3:E2F4:E2F5:E2F6	CGAAACGT	1e-60	-138.7	0	7182	0.422	10464.6	0.3609
M04330_2.00:JUN:JUNB:JUND	BATGASTCATS	1e-59	-137.2	0	484	0.0284	356.1	0.0123
M04628_2.00:ZNF460	CAACGCCCCCCSM	1e-59	-136.8	0	660	0.0388	558.7	0.0193
M03011_2.00:EHF:ELF1:ELF2:ELF3:ELF4:ELF5:ETV6:ETV7:SPI1:SPIC	ACCCGGAAGTD	1e-59	-136.7	0	1833	0.1077	2118.4	0.0731
M04931_2.00:CRX:DMBX1:DPRX:GSC:GSC2:OTX1:OTX2:PITX1:PITX2:PITX3:TPRX1	CTAATCCC	1e-59	-136.4	0	4272	0.251	5788.5	0.1996
M07796_2.00:MAX	CCACGTGRYC	1e-59	-136.2	0	872	0.0512	819.4	0.0283
M04443_2.00:SNAI1	TGCACCTGYT	1e-58	-135.5	0	1690	0.0993	1920.8	0.0662
M01481_2.00:ELF1:ELF2:ELF4:ELK1:ELK3:ELK4:ERF:ERG:ETS1:ETS2:ETV1:ETV2:ETV3:ETV3L:ETV4:ETV5:FEV:FLI1:GABPA	NRCCGGAAGT	1e-58	-135.4	0	1306	0.0767	1390.4	0.0479
M04266_2.00:NFE2:NFE2L1:NFE2L2:NFE2L3	VATGASTCATB	1e-58	-135.4	0	517	0.0304	395.8	0.0137
M10517_2.00:ELF1:ELF2:ELF4:ELK1:ELK3:ELK4:ERF:ERG:ETS1:ETS2:ETV1:ETV2:ETV3:ETV3L:ETV4:ETV5:FEV:FLI1:GABPA	AGGAAGT	1e-58	-134.9	0	10740	0.6311	16529.1	0.57
M10023_2.00:CEBPA:CEBPB:CEBPE	TVTKTGGWAANNN	1e-58	-134.9	0	5582	0.328	7877.3	0.2717
M10515_2.00:EHF:ELF1:ELF2:ELF3:ELF4:ELF5:ETV6:ETV7	CCCGGAARTA	1e-58	-134.5	0	2864	0.1683	3636.9	0.1254
M07972_2.00:POU2F2	ATATGCAAAT	1e-58	-134.3	0	1676	0.0985	1904.4	0.0657
M07973_2.00:POU2F2	ATATGCAAAT	1e-58	-134.3	0	1676	0.0985	1904.4	0.0657
M00735_2.00:RBPJ	NNKTTCCCAY	1e-57	-133	0	11488	0.675	17854.6	0.6157
M10539_2.00:FOXO1:FOXO3:FOXO4:FOXO6:FOXP4	AAARTAAACAADH	1e-57	-131.3	0	5237	0.3077	7345.6	0.2533
M08363_2.00:SP1:SP3:SP4:SP5:SP8:SP9	CCCCGSCCCCKCCCC	1e-56	-131.2	0	1075	0.0632	1092.7	0.0377
M08185_2.00:BACH1:BACH2	TGACTCAGCA	1e-56	-131.2	0	369	0.0217	242	0.0083
M11224_2.00:NFAT5	GGAAAAYWCYAB	1e-56	-131.2	0	2072	0.1218	2480.6	0.0855
M03228_2.00:HOXA10:HOXA11:HOXA6:HOXA9:HOXB6:HOXB8:HOXB9:HOXC10:HOXC11:HOXC12:HOXC6:HOXC8:HOXC9:HOXD10:HOXD11:HOXD12:HOXD8:HOXD9	TTTTTATGGS	1e-56	-130.9	0	7167	0.4211	10490.8	0.3618
M10502_2.00:ELF1:ELF2:ELF4:ELK1:ELK3:ELK4:ERF:ERG:ETS1:ETS2:ETV1:ETV2:ETV3:ETV3L:ETV4:ETV5:FEV:FLI1:GABPA	MGGAAGT	1e-56	-130	0	8772	0.5155	13182.2	0.4546
M02283_2.00:SRF	CCAAATHNGG	1e-56	-129.8	0	6021	0.3538	8618.2	0.2972
M09070_2.00:ELF1:ELF2:ELF4:ELK1:ELK3:ELK4:ERF:ERG:ETS1:ETS2:ETV1:ETV2:ETV3:ETV3L:ETV4:ETV5:FEV:FLI1:GABPA	ACCGGAAGTGR	1e-55	-128.7	0	515	0.0303	402.6	0.0139
M02681_2.00:FOXC1:FOXC2:FOXD1:FOXD2:FOXD3:FOXD4:FOXD4L1:FOXD4L3:FOXD4L4:FOXD4L5:FOXD4L6:FOXE1:FOXE3:FOXF1:FOXF2:FOXG1:FOXI1:FOXI3:FOXJ3:FOXL1:FOXL2:FOXS1	GTAAACAW	1e-55	-128.7	0	3778	0.222	5059.1	0.1745
M00741_2.00:RBPJ	NNKTTCCCAY	1e-55	-128.7	0	11013	0.6471	17049.7	0.588
M10881_2.00:IRF1:IRF2	NRGAAAGTGAAAST	1e-55	-128.2	0	1623	0.0954	1849	0.0638
M02735_2.00:ELF1:ELF2:ELF4:ELK1:ELK3:ELK4:ERF:ERG:ETS1:ETS2:ETV1:ETV2:ETV3:ETV3L:ETV4:ETV5:FEV:FLI1:GABPA	ACCGGAAGT	1e-55	-128.2	0	700	0.0411	621.5	0.0214
M02997_2.00:ELF1:ELF2:ELF4:ELK1:ELK3:ELK4:ERF:ERG:ETS1:ETS2:ETV1:ETV2:ETV3:ETV3L:ETV4:ETV5:FEV:FLI1:GABPA	ACCGGAARTV	1e-55	-128.1	0	681	0.04	598.1	0.0206
M09400_2.00:LEF1:TCF7:TCF7L1:TCF7L2	VRASATCAAAGRVRVV	1e-55	-128.1	0	2560	0.1504	3209.2	0.1107
M09938_2.00:BACH1:BACH2	CRTGAGTCATC	1e-55	-127.2	0	732	0.043	662	0.0228
M10514_2.00:ELF1:ELF2:ELF4:ELK1:ELK3:ELK4:ERF:ERG:ETS1:ETS2:ETV1:ETV2:ETV3:ETV3L:ETV4:ETV5:FEV:FLI1:GABPA	CWTCCKGT	1e-55	-127.2	0	3161	0.1857	4118.6	0.142
M09101_2.00:FOXP1:FOXP2:FOXP3:FOXP4	WGTAAACAV	1e-55	-127.2	0	6771	0.3979	9861.8	0.3401
M06189_2.00:ELF1:ELF2:ELF4:ELK1:ELK3:ELK4:ERF:ERG:ETS1:ETS2:ETV1:ETV2:ETV3:ETV3L:ETV4:ETV5:ETV6:FEV:FLI1:GABPA	ACCGGAAGT	1e-55	-126.7	0	476	0.028	361.6	0.0125
M02999_2.00:ELF1:ELF2:ELF4:ELK1:ELK3:ELK4:ERF:ERG:ETS1:ETS2:ETV1:ETV2:ETV3:ETV3L:ETV4:ETV5:FEV:FLI1:GABPA	ACCGGAAGTG	1e-54	-126.4	0	566	0.0333	464.8	0.016
M05790_2.00:SOX1:SOX10:SOX11:SOX12:SOX13:SOX14:SOX15:SOX17:SOX18:SOX2:SOX21:SOX3:SOX30:SOX4:SOX5:SOX6:SOX7:SOX8:SOX9:SRY	CATTGTTCGGT	1e-54	-126	0	899	0.0528	875.5	0.0302
M10726_2.00:CDX1:CDX2:CDX4	WDDNWWTTTATRRH	1e-54	-125.7	0	6530	0.3837	9475.8	0.3268
M03115_2.00:CDX1:CDX2:CDX4	TTTTATKRC	1e-54	-125.7	0	5629	0.3308	8009.5	0.2762
M04900_2.00:HOXA10:HOXA11:HOXA9:HOXB9:HOXC10:HOXC11:HOXC12:HOXC9:HOXD10:HOXD11:HOXD12:HOXD9	RTTTTATKRCH	1e-54	-125.6	0	3072	0.1805	3990.3	0.1376
M09534_2.00:EHF:ELF1:ELF2:ELF3:ELF4:ELF5:ETV6:ETV7:SPI1:SPIC	ACVAGGAAGT	1e-54	-124.7	0	1199	0.0705	1274.1	0.0439
M11325_2.00:SOX1:SOX10:SOX11:SOX12:SOX13:SOX14:SOX15:SOX17:SOX18:SOX2:SOX21:SOX3:SOX30:SOX4:SOX5:SOX6:SOX7:SOX8:SOX9:SRY	VACAATDGA	1e-54	-124.4	0	5823	0.3422	8331.4	0.2873
M01478_2.00:ELF1:ELF2:ELF4:ELK1:ELK3:ELK4:ERF:ERG:ETS1:ETS2:ETV1:ETV2:ETV3:ETV3L:ETV4:ETV5:FEV:FLI1:GABPA	NRCCGGAAGT	1e-53	-124.3	0	1648	0.0968	1897.3	0.0654
M04077_2.00:USF2	RCCATGTGACM	1e-53	-124.2	0	999	0.0587	1009.4	0.0348
M09048_2.00:ELF1:ELF2:ELF4:ELK1:ELK3:ELK4:ERF:ERG:ETS1:ETS2:ETV1:ETV2:ETV3:ETV3L:ETV4:ETV5:FEV:FLI1:GABPA	RRARACAGGAARTRGS	1e-53	-124.2	0	464	0.0273	351.8	0.0121
M09067_2.00:ELF1:ELF2:ELF4:ELK1:ELK3:ELK4:ERF:ERG:ETS1:ETS2:ETV1:ETV2:ETV3:ETV3L:ETV4:ETV5:FEV:FLI1:GABPA	RRARACAGGAARTRGS	1e-53	-124.2	0	464	0.0273	351.8	0.0121
M08321_2.00:ZNF281	BBCCCCTCCCCC	1e-53	-123.6	0	1121	0.0659	1172.4	0.0404
M08184_2.00:BACH1:BACH2	GTCACGTG	1e-53	-122.5	0	2532	0.1488	3191.3	0.1101
M09531_2.00:ELF1:ELF2:ELF4:ELK1:ELK3:ELK4:ERF:ERG:ETS1:ETS2:ETV1:ETV2:ETV3:ETV3L:ETV4:ETV5:FEV:FLI1:GABPA	RCCGGAAGTD	1e-52	-121.9	0	1451	0.0853	1628.6	0.0562
M02994_2.00:ELF1:ELF2:ELF4:ELK1:ELK3:ELK4:ERF:ERG:ETS1:ETS2:ETV1:ETV2:ETV3:ETV3L:ETV4:ETV5:FEV:FLI1:GABPA	ACCGGAARTG	1e-52	-119.9	0	408	0.024	295.3	0.0102
M05135_2.00:CRX:DMBX1:DPRX:GSC:GSC2:OTX1:OTX2:PITX1:PITX2:PITX3:TPRX1	CTAATCCS	1e-51	-119.6	0	4446	0.2613	6155.8	0.2123
M10263_2.00:SP1:SP3:SP4:SP5:SP6:SP8:SP9	GGGGCGGGGCSG	1e-51	-119.1	0	1201	0.0706	1293	0.0446
M09515_2.00:EGR1:EGR2:EGR3:EGR4	YCCGCCCACGCN	1e-51	-118.3	0	905	0.0532	900.8	0.0311
M10880_2.00:IRF1:IRF2	CTTTCACTTTCANT	1e-51	-117.8	0	442	0.026	335.2	0.0116
M04760_2.00:ELF1:ELF2:ELF4:ELK1:ELK3:ELK4:ERF:ERG:ETS1:ETS2:ETV1:ETV2:ETV3:ETV3L:ETV4:ETV5:FEV:FLI1:GABPA	VACCGGAARTS	1e-50	-117.3	0	468	0.0275	365.4	0.0126
M01497_2.00:MAX	NCACATGBH	1e-50	-117	0	8631	0.5072	13036.2	0.4496
M02964_2.00:ELF1:ELF2:ELF4:ELK1:ELK3:ELK4:ERF:ERG:ETS1:ETS2:ETV1:ETV2:ETV3:ETV3L:ETV4:ETV5:FEV:FLI1:GABPA	ACCGGAAGTR	1e-50	-116.5	0	489	0.0287	390.3	0.0135
M00771_2.00:ZKSCAN1	DNNYRYRNNH	1e-50	-116.5	0	7642	0.4491	11378.1	0.3924
M04764_2.00:ELF1:ELF2:ELF4:ELK1:ELK3:ELK4:ERF:ERG:ETS1:ETS2:ETV1:ETV2:ETV3:ETV3L:ETV4:ETV5:FEV:FLI1:GABPA	VACCGGAAGTG	1e-50	-116.4	0	342	0.0201	229.4	0.0079
M05175_2.00:ALX1:ALX3:ALX4:ARX:DRGX:EMX1:EMX2:EN1:EN2:ESX1:GBX1:GBX2:HESX1:ISX:LHX1:LHX2:LHX3:LHX4:LHX5:LHX6:LHX8:LHX9:LMX1A:LMX1B:MIXL1:MSX1:MSX2:NOBOX:NOTO:OTP:PHOX2A:PHOX2B:PROP1:PRRX1:PRRX2:RAX:RAX2:SEBOX:SHOX:SHOX2:UNCX:VAX1:VAX2:VSX1:VSX2:ZFHX2	HTAACGAG	1e-50	-116	0	1832	0.1077	2189.3	0.0755
M03501_2.00:SOX1:SOX10:SOX11:SOX12:SOX13:SOX14:SOX15:SOX17:SOX18:SOX2:SOX21:SOX3:SOX30:SOX4:SOX5:SOX6:SOX7:SOX8:SOX9:SRY	DAACAATRG	1e-50	-115.8	0	5485	0.3223	7839.8	0.2704
M02832_2.00:NFE2:NFE2L1:NFE2L2:NFE2L3	VATGACTCATC	1e-49	-114.8	0	312	0.0183	200.5	0.0069
M03006_2.00:ELF1:ELF2:ELF4:ELK1:ELK3:ELK4:ERF:ERG:ETS1:ETS2:ETV1:ETV2:ETV3:ETV3L:ETV4:ETV5:FEV:FLI1:GABPA	ACCGGAAGTR	1e-49	-114.4	0	618	0.0363	546.6	0.0189
M03001_2.00:ELF1:ELF2:ELF4:ELK1:ELK3:ELK4:ERF:ERG:ETS1:ETS2:ETV1:ETV2:ETV3:ETV3L:ETV4:ETV5:FEV:FLI1:GABPA	ACCGGAAGTR	1e-49	-114.1	0	433	0.0254	330.6	0.0114
M10237_2.00:ZNF281	TGGGGGAGGGG	1e-49	-114.1	0	1230	0.0723	1346.2	0.0464
M11323_2.00:SOX1:SOX10:SOX11:SOX12:SOX13:SOX14:SOX15:SOX17:SOX18:SOX2:SOX21:SOX3:SOX30:SOX4:SOX5:SOX6:SOX7:SOX8:SOX9:SRY	AACAAT	1e-49	-113.5	0	8728	0.5129	13226.2	0.4561
M04949_2.00:CRX:DMBX1:DPRX:GSC:GSC2:OTX1:OTX2:PITX1:PITX2:PITX3:TPRX1	CTAATCCS	1e-49	-113.2	0	5082	0.2986	7207.9	0.2486
M03847_2.00:BARHL1:BARHL2:BSX:EMX1:EMX2:EN1:EN2:GSX1:GSX2:HMX1:HMX2:HMX3:HOXA3:HOXA4:HOXA5:HOXB3:HOXB4:HOXB5:HOXC4:HOXC5:HOXD3:HOXD4:MEOX2:NKX1-1:NKX1-2:NKX6-1:NKX6-2:NKX6-3:NOBOX:PDX1:TLX1:TLX2:TLX3:VAX1:VAX2	RTTAAACGGTW	1e-48	-112.8	0	590	0.0347	515.9	0.0178
M10863_2.00:HSF1:HSF2:HSF4	AGAABGTTCG	1e-48	-112.7	0	2148	0.1262	2663	0.0918
M01911_2.00:FBXL19:KDM2A:KDM2B	NNNNTACGN	1e-48	-112.5	0	9827	0.5774	15109.8	0.5211
M10111_2.00:PRDM1	CACTTTCAC	1e-48	-111.7	0	1272	0.0747	1412	0.0487
M05354_2.00:POU6F1	DTAATGAGAW	1e-48	-111.5	0	3103	0.1823	4106.4	0.1416
M00737_2.00:RBPJ	NNKTTCCCAY	1e-48	-110.8	0	11206	0.6585	17516.9	0.6041
M01483_2.00:ELF1:ELF2:ELF4:ELK1:ELK3:ELK4:ERF:ERG:ETS1:ETS2:ETV1:ETV2:ETV3:ETV3L:ETV4:ETV5:FEV:FLI1:GABPA	NACCGGAAGT	1e-48	-110.6	0	773	0.0454	747.1	0.0258
M08825_2.00:ATF3:JDP2	VTGACTCAB	1e-47	-110.3	0	2858	0.1679	3738.5	0.1289
M07957_2.00:ELF1:ELF2:ELF4:ELK1:ELK3:ELK4:ERF:ERG:ETS1:ETS2:ETV1:ETV2:ETV3:ETV3L:ETV4:ETV5:FEV:FLI1:GABPA	CCGGAAGTGG	1e-47	-109.8	0	651	0.0383	595.8	0.0205
M10105_2.00:IKZF1:IKZF2:IKZF3:IKZF4	HWTAGGGATAW	1e-47	-109.8	0	4683	0.2752	6590.6	0.2273
M08832_2.00:BACH1:BACH2	RTGACTCAGCA	1e-46	-107.9	0	672	0.0395	625.5	0.0216
M04997_2.00:CRX:DMBX1:DPRX:GSC:GSC2:OTX1:OTX2:PITX1:PITX2:PITX3:TPRX1	YTAATCCC	1e-46	-107.7	0	5174	0.304	7390.6	0.2549
M11238_2.00:RELA	GGGRATTTC	1e-46	-107.7	0	1677	0.0985	1996.9	0.0689
M10508_2.00:ELF1:ELF2:ELF4:ELK1:ELK3:ELK4:ERF:ERG:ETS1:ETS2:ETV1:ETV2:ETV3:ETV3L:ETV4:ETV5:FEV:FLI1:GABPA	CACTTCCGGYBC	1e-46	-107.6	0	440	0.0259	347.6	0.012
M08944_2.00:ZNF250	TACCATRCTGTTTTGRTTAC	1e-46	-107.6	0	231	0.0136	128.3	0.0044
M10509_2.00:ELF1:ELF2:ELF4:ELK1:ELK3:ELK4:ERF:ERG:ETS1:ETS2:ETV1:ETV2:ETV3:ETV3L:ETV4:ETV5:FEV:FLI1:GABPA	MGVSRGGAAG	1e-46	-107.3	0	7386	0.434	11018.5	0.38
M09218_2.00:POU2F2	AYATGCAAATK	1e-46	-107.1	0	2286	0.1343	2891.9	0.0997
M09224_2.00:POU2F2	AYATGCAAATK	1e-46	-107.1	0	2286	0.1343	2891.9	0.0997
M11315_2.00:LEF1:TCF7:TCF7L1:TCF7L2	TCAAAGG	1e-46	-106.9	0	7609	0.4471	11393.9	0.3929
M02888_2.00:KLF14:KLF16	GCCACGCCCCC	1e-46	-106.7	0	1188	0.0698	1310.1	0.0452
M03964_2.00:RUNX1:RUNX2:RUNX3	WAACCGCAAAA	1e-46	-106.6	0	646	0.038	595.6	0.0205
M04673_2.00:ONECUT1:ONECUT2:ONECUT3	NYATCGATYN	1e-46	-106.5	0	1694	0.0995	2025.7	0.0699
M07958_2.00:ELF1:ELF2:ELF4:ELK1:ELK3:ELK4:ERF:ERG:ETS1:ETS2:ETV1:ETV2:ETV3:ETV3L:ETV4:ETV5:FEV:FLI1:GABPA	GRCCGGAAGTG	1e-46	-106.3	0	410	0.0241	315.8	0.0109
M05887_2.00:NFKB1:NFKB2	VGGGRNTTYCCCB	1e-45	-105.9	0	1346	0.0791	1532.6	0.0529
M05486_2.00:POU3F1	DTATGCWAATKAS	1e-45	-105.8	0	1569	0.0922	1848.8	0.0638
M09165_2.00:PBX1:PBX2:PBX3:PBX4	KRAATTGATTGATKG	1e-45	-105.7	0	403	0.0237	308.3	0.0106
M09199_2.00:PBX1:PBX2:PBX3:PBX4	KRAATTGATTGATKG	1e-45	-105.7	0	403	0.0237	308.3	0.0106
M04950_2.00:CRX:DMBX1:DPRX:GSC:GSC2:OTX1:OTX2:PITX1:PITX2:PITX3:TPRX1	CTAATCCC	1e-45	-105.5	0	4602	0.2704	6488.2	0.2237
M02122_2.00:CRX:DMBX1:GSC:OTX1:OTX2:TPRX1	MTAATCCV	1e-45	-105.4	0	4507	0.2648	6337.6	0.2186
M04928_2.00:CRX:DMBX1:DPRX:GSC:GSC2:OTX1:OTX2:PITX1:PITX2:PITX3:TPRX1	CTAATCCC	1e-45	-105.4	0	4507	0.2648	6337.6	0.2186
M05230_2.00:CRX:DMBX1:DPRX:GSC:GSC2:OTX1:OTX2:PITX1:PITX2:PITX3:TPRX1	CTAATCCC	1e-45	-105.4	0	4507	0.2648	6337.6	0.2186
M01489_2.00:ELF1:ELF2:ELF4:ELK1:ELK3:ELK4:ERF:ERG:ETS1:ETS2:ETV1:ETV2:ETV3:ETV3L:ETV4:ETV5:FEV:FLI1:GABPA	NRCCGGAART	1e-45	-105.3	0	1606	0.0944	1903.3	0.0656
M05831_2.00:MYF5:MYF6:MYOG	YAACAGTTGWY	1e-45	-105.2	0	2293	0.1347	2910.8	0.1004
M00304_2.00:BARX1:BARX2:BSX:EMX1:EMX2:EN1:EN2:EVX1:EVX2:GBX1:GBX2:GSX1:GSX2:HMX1:HMX2:HMX3:HOXA1:HOXA2:HOXA3:HOXA4:HOXA5:HOXB1:HOXB2:HOXB3:HOXB4:HOXB5:HOXC4:HOXC5:HOXD1:HOXD3:HOXD4:LBX2:MEOX1:MEOX2:MNX1:NANOG:NANOGP8:NKX1-1:NKX1-2:PDX1:TLX2:VENTX	AATATATAY	1e-45	-104.9	0	4763	0.2799	6749.3	0.2328
M02737_2.00:FOXC2:FOXD1:FOXD2:FOXD3:FOXG1:FOXI1:FOXI2:FOXI3:FOXJ2:FOXJ3:FOXK1:FOXK2:FOXP1:FOXP3	ATAAACAA	1e-45	-104.8	0	5151	0.3027	7372.8	0.2543
M03139_2.00:HOXA10:HOXA11:HOXA9:HOXB9:HOXC10:HOXC11:HOXC12:HOXC9:HOXD10:HOXD11:HOXD12:HOXD9	GTCGTAAAAW	1e-45	-104.6	0	1338	0.0786	1525.8	0.0526
M09681_2.00:CRX:DMBX1:DPRX:GSC:GSC2:OTX1:OTX2:PITX1:PITX2:PITX3:TPRX1	YTAATCCS	1e-45	-104.5	0	4669	0.2744	6601.6	0.2277
M02081_2.00:HOXA13:HOXB13:HOXC13:HOXD13	TTTTATTA	1e-45	-104.4	0	8806	0.5175	13427	0.463
M07797_2.00:MAX	CCACGTGNYYC	1e-45	-104.4	0	993	0.0583	1051.5	0.0363
M00554_2.00:HOXA10:HOXA11:HOXA6:HOXA9:HOXB6:HOXB8:HOXB9:HOXC10:HOXC11:HOXC12:HOXC5:HOXC6:HOXC8:HOXC9:HOXD10:HOXD11:HOXD12:HOXD8:HOXD9	WTTWATKRCN	1e-45	-104.4	0	9957	0.5851	15396	0.5309
M08795_2.00:FOS:FOSB:FOSL1:FOSL2	VTGACTCAY	1e-45	-104.1	0	3046	0.179	4057.3	0.1399
M09051_2.00:ELF1:ELF2:ELF4:ELK1:ELK3:ELK4:ERF:ERG:ETS1:ETS2:ETV1:ETV2:ETV3:ETV3L:ETV4:ETV5:FEV:FLI1:GABPA	ACCGGAAGTGV	1e-45	-103.8	0	406	0.0239	314.8	0.0109
M05550_2.00:IRF9	RCGAAACTGAAACTN	1e-44	-103.2	0	225	0.0132	126.8	0.0044
M04059_2.00:MITF:TFE3	NGTCACATGBY	1e-44	-103.2	0	1096	0.0644	1194.5	0.0412
M03725_2.00:ELF1:ELF2:ELF4:ELK1:ELK3:ELK4:ERF:ERG:ETS1:ETS2:ETV1:ETV2:ETV3:ETV3L:ETV4:ETV5:FEV:FLI1:GABPA	ACCGGAAGTG	1e-44	-103.1	0	436	0.0256	349.9	0.0121
M10686_2.00:HOXA10:HOXA11:HOXA5:HOXA6:HOXA7:HOXA9:HOXB5:HOXB6:HOXB8:HOXB9:HOXC10:HOXC11:HOXC5:HOXC6:HOXC8:HOXC9:HOXD10:HOXD11:HOXD8:HOXD9	ACNCATAAAA	1e-44	-103	0	5362	0.3151	7725.3	0.2664
M10134_2.00:MZF1	KGGBGAGGGGGAA	1e-44	-103	0	1320	0.0776	1505.7	0.0519
M04542_2.00:ZNF282	TTTCCCACAACACD	1e-44	-102.7	0	543	0.0319	476.6	0.0164
M02968_2.00:ELF1:ELF2:ELF4:ELK1:ELK3:ELK4:ERF:ERG:ETS1:ETS2:ETV1:ETV2:ETV3:ETV3L:ETV4:ETV5:FEV:FLI1:GABPA	ACCGGAAGTR	1e-44	-102.4	0	429	0.0252	342.4	0.0118
M05249_2.00:CDX1:CDX2:CDX4	VTTTATGGC	1e-44	-102.1	0	7240	0.4254	10814.9	0.373
M10482_2.00:ELF1:ELF2:ELF4:ELK1:ELK3:ELK4:ERF:ERG:ETS1:ETS2:ETV1:ETV2:ETV3:ETV3L:ETV4:ETV5:FEV:FLI1:GABPA	CACTTCCKGK	1e-44	-101.9	0	1380	0.0811	1593.4	0.0549
M08273_2.00:ZNF200	RCTTCCGGYBBS	1e-44	-101.7	0	651	0.0383	611.3	0.0211
M09061_2.00:EHF:ELF1:ELF2:ELF4:ELK1:ELK3:ELK4:ERF:ERG:ETS1:ETS2:ETV1:ETV2:ETV3:ETV3L:ETV4:ETV5:FEV:FLI1:GABPA	GCVGGAAGYG	1e-44	-101.6	0	4317	0.2537	6059.8	0.209
M09082_2.00:EHF:ELF1:ELF2:ELF4:ELK1:ELK3:ELK4:ERF:ERG:ETS1:ETS2:ETV1:ETV2:ETV3:ETV3L:ETV4:ETV5:FEV:FLI1:GABPA	GCVGGAAGYG	1e-44	-101.6	0	4317	0.2537	6059.8	0.209
M00155_2.00:ELF5:SPI1:SPIB:SPIC	WDRVGGAAST	1e-44	-101.5	0	9538	0.5605	14698.1	0.5069
M05358_2.00:SIX3:SIX6	VSGTATCRYN	1e-43	-100.8	0	4497	0.2642	6350.2	0.219
M11086_2.00:NR1H2:NR1H3:NR1H4:NR2C1:NR2C2:NR2F1:NR2F2:NR2F6:RARA:RARB:RARG:RORA:RORB:RORC:RXRA:RXRB:RXRG:VDR	AGGTCAY	1e-43	-100.8	0	9093	0.5343	13943.1	0.4808
M09056_2.00:ELF1:ELF2:ELF4:ELK1:ELK3:ELK4:ERF:ERG:ETS1:ETS2:ETV1:ETV2:ETV3:ETV3L:ETV4:ETV5:FEV:FLI1:GABPA	GVVRCCGGAAGTGV	1e-43	-100.7	0	274	0.0161	176.6	0.0061
M05059_2.00:BARX1:BARX2:BSX:DLX1:DLX2:DLX3:DLX4:DLX5:DLX6:EMX1:EMX2:EN1:EN2:EVX1:EVX2:GBX1:GBX2:GSX1:GSX2:HOXA1:HOXA2:HOXA3:HOXA4:HOXA5:HOXB1:HOXB2:HOXB3:HOXB4:HOXB5:HOXC4:HOXC5:HOXD1:HOXD3:HOXD4:ISX:MEOX1:MEOX2:MNX1:MSX1:MSX2:NANOG:NANOGP8:NKX1-1:NKX1-2:PDX1:PROP1:SHOX:SHOX2:UNCX:VAX1:VAX2:VENTX	DTAAYGAB	1e-43	-100.7	0	8750	0.5142	13362	0.4608
M10753_2.00:PBX1:PBX2:PBX3:PBX4	ATCAATCAA	1e-43	-100.5	0	3580	0.2104	4904	0.1691
M02979_2.00:ELF1:ELF2:ELF4:ELK1:ELK3:ELK4:ERF:ERG:ETS1:ETS2:ETV1:ETV2:ETV3:ETV3L:ETV4:ETV5:FEV:FLI1:GABPA	ACCGGAAGTD	1e-43	-100	0	418	0.0246	333.6	0.0115
M00174_2.00:IRF3	RAANGGAAAC	1e-43	-99.6	0	5559	0.3267	8069	0.2783
M09157_2.00:SIX1:SIX2:SIX4:SIX5	TGAAAYHTGAKAC	1e-43	-99.44	0	983	0.0578	1052	0.0363
M01210_2.00:CXXC4:CXXC5:TET3	NNDACGTN	1e-43	-99.33	0	7705	0.4528	11612	0.4004
M11302_2.00:SOX1:SOX10:SOX11:SOX12:SOX13:SOX14:SOX15:SOX17:SOX18:SOX2:SOX21:SOX3:SOX30:SOX4:SOX5:SOX6:SOX7:SOX8:SOX9:SRY	BCTTTGT	1e-43	-99.1	0	11260	0.6617	17700.4	0.6104
M01986_2.00:FOXC1:FOXC2:FOXD1:FOXD2:FOXD3:FOXD4:FOXD4L1:FOXD4L3:FOXD4L4:FOXD4L5:FOXD4L6:FOXE1:FOXG1:FOXI1:FOXI2:FOXI3:FOXJ3:FOXK2:FOXL1:FOXL2:FOXS1	TGTAAACAAN	1e-42	-98.89	0	4373	0.257	6165.7	0.2126
M10888_2.00:IRF4:IRF8	KAAAMWGAAAVYA	1e-42	-98.76	0	2729	0.1604	3599.7	0.1241
M05160_2.00:SIX3:SIX6	NDYGATACGY	1e-42	-98.39	0	3806	0.2236	5271.2	0.1818
M00300_2.00:HOXA13:HOXB13:HOXC13:HOXD13	TTTTATTA	1e-42	-98.36	0	8621	0.5066	13161.5	0.4539
M10516_2.00:EHF:ELF1:ELF2:ELF3:ELF4:ELF5:ETV6:ETV7	CAGGAAAYD	1e-42	-98.24	0	9153	0.5378	14066.3	0.4851
M00190_2.00:GMEB1:GMEB2	YKACGYANN	1e-42	-97.82	0	5819	0.3419	8504.7	0.2933
M02891_2.00:ZNF740	CCCCCCCCAC	1e-42	-97.76	0	915	0.0538	964.5	0.0333
M04147_2.00:USF1:USF2	ACCATGTGACV	1e-42	-97.75	0	944	0.0555	1003.2	0.0346
M08065_2.00:BACH1:BACH2	SATGACTCAGCANW	1e-42	-96.95	0	361	0.0212	273.2	0.0094
M06188_2.00:ELF1:ELF2:ELF4:ELK1:ELK3:ELK4:ERF:ERG:ETS1:ETS2:ETV1:ETV2:ETV3:ETV3L:ETV4:ETV5:FEV:FLI1:GABPA	ACCGGAART	1e-41	-96.24	0	809	0.0475	827.3	0.0285
M09960_2.00:NFE2:NFE2L1:NFE2L2:NFE2L3	ATGACTCAG	1e-41	-95.99	0	1300	0.0764	1500.3	0.0517
M10499_2.00:ELF1:ELF2:ELF4:ELK1:ELK3:ELK4:ERF:ERG:ETS1:ETS2:ETV1:ETV2:ETV3:ETV3L:ETV4:ETV5:FEV:FLI1:GABPA	RCAGGAAGTGVKTGS	1e-41	-95.85	0	596	0.035	554.5	0.0191
M02969_2.00:ELF1:ELF2:ELF4:ELK1:ELK3:ELK4:ERF:ERG:ETS1:ETS2:ETV1:ETV2:ETV3:ETV3L:ETV4:ETV5:FEV:FLI1:GABPA	ACCGGAAGTD	1e-41	-95.81	0	365	0.0214	279.8	0.0096
M03070_2.00:GCM1:GCM2	CATGCGGGTAC	1e-41	-95.81	0	312	0.0183	221.4	0.0076
M03186_2.00:ALX1:ALX3:ALX4:ARX:BARHL1:BARHL2:BARX1:BARX2:BSX:DLX1:DLX2:DLX3:DLX4:DLX5:DLX6:DRGX:EMX1:EMX2:EN1:EN2:ESX1:EVX1:EVX2:GBX1:GBX2:GSX1:GSX2:HESX1:HMX1:HMX2:HMX3:HOXA1:HOXA2:HOXA3:HOXB1:HOXB2:HOXB3:HOXD1:HOXD3:ISX:LBX1:LBX2:LHX1:LHX2:LHX3:LHX4:LHX5:LHX9:MEOX1:MEOX2:MIXL1:MNX1:MSX1:MSX2:NANOG:NANOGP8:NKX1-1:NKX1-2:NOBOX:OTP:PDX1:PHOX2A:PHOX2B:PROP1:PRRX1:PRRX2:RAX:RAX2:SEBOX:SHOX:SHOX2:UNC…	BTAATTGG	1e-41	-95.33	0	4972	0.2922	7148.8	0.2465
M01245_2.00:HOXA11:HOXA6:HOXA7:HOXB6:HOXB7:HOXB8:HOXC11:HOXC6:HOXC8:HOXD11:HOXD8	TTTTATKRYH	1e-41	-95.23	0	8430	0.4954	12863.4	0.4436
M10495_2.00:ELF1:ELF2:ELF4:ELK1:ELK3:ELK4:ERF:ERG:ETS1:ETS2:ETV1:ETV2:ETV3:ETV3L:ETV4:ETV5:FEV:FLI1:GABPA	BVKACCGGAWGTNRGW	1e-41	-95.15	0	446	0.0262	373.4	0.0129
M07816_2.00:JUN:JUNB:JUND	TGATGACTCATNYHY	1e-41	-94.91	0	295	0.0173	204.6	0.0071
M09641_2.00:SOX1:SOX10:SOX11:SOX12:SOX13:SOX14:SOX15:SOX17:SOX18:SOX2:SOX21:SOX3:SOX30:SOX4:SOX5:SOX6:SOX7:SOX8:SOX9:SRY	YCTTTGTTCC	1e-41	-94.83	0	2339	0.1374	3027.4	0.1044
M10260_2.00:ZNF217	ATTCCVAC	1e-41	-94.8	0	5912	0.3474	8678.2	0.2993
M09091_2.00:FOXO1:FOXO3:FOXO4:FOXO6	DGWAAACAGGVM	1e-40	-94.21	0	5023	0.2952	7238.3	0.2496
M07952_2.00:ELF1:ELF2:ELF4:ELK1:ELK3:ELK4:ERF:ERG:ETS1:ETS2:ETV1:ETV2:ETV3:ETV3L:ETV4:ETV5:FEV:FLI1:GABPA	VRCCGGAAGTG	1e-40	-94.21	0	379	0.0223	297.7	0.0103
M09959_2.00:NFE2:NFE2L1:NFE2L2:NFE2L3	TGCTGAGTCAY	1e-40	-94.13	0	527	0.031	472.8	0.0163
M05024_2.00:CRX:DMBX1:DPRX:GSC:GSC2:OTX1:OTX2:PITX1:PITX2:PITX3:TPRX1	HTAATCCSYH	1e-40	-94.11	0	4415	0.2594	6263.9	0.216
M04089_2.00:MITF:TFEB	ANCATGTGACN	1e-40	-94	0	1286	0.0756	1487.8	0.0513
M04998_2.00:CRX:DMBX1:DPRX:GSC:GSC2:OTX1:OTX2:PITX1:PITX2:PITX3:TPRX1	CTAATCCC	1e-40	-93.94	0	5289	0.3108	7670.4	0.2645
M00775_2.00:ZBTB1	NHCCCGCAHN	1e-40	-93.92	0	2903	0.1706	3891.7	0.1342
M04285_2.00:ATF3:JDP2	SATGASTCATC	1e-40	-93.87	0	576	0.0338	533.5	0.0184
M05544_2.00:IRF4:IRF8	RYGAAACTGAAACTA	1e-40	-93.58	0	145	0.0085	63.5	0.0022
M05022_2.00:CRX:DMBX1:DPRX:GSC:GSC2:OTX1:OTX2:PITX1:PITX2:PITX3:TPRX1	NTAATCCS	1e-40	-93.08	0	4690	0.2756	6710.9	0.2314
M09069_2.00:ELF1:ELF2:ELF4:ELK1:ELK3:ELK4:ERF:ERG:ETS1:ETS2:ETV1:ETV2:ETV3:ETV3L:ETV4:ETV5:FEV:FLI1:GABPA	GGMRCCGGAAGTGV	1e-40	-92.67	0	235	0.0138	145.5	0.005
M09486_2.00:NFE2:NFE2L1:NFE2L2:NFE2L3	GATGACTCAGCA	1e-40	-92.62	0	240	0.0141	150.2	0.0052
M00739_2.00:RBPJ	NDTTCCCAY	1e-40	-92.51	0	11847	0.6961	18785.6	0.6478
M04083_2.00:MLX	KRTCACRTGKR	1e-39	-92.03	0	3299	0.1939	4515.2	0.1557
M06224_2.00:CDX1:CDX2:CDX4:HOXA13:HOXC13	ATCATAAAR	1e-39	-92	0	9272	0.5448	14320.1	0.4938
M05136_2.00:CRX:DMBX1:DPRX:GSC:GSC2:OTX1:OTX2:PITX1:PITX2:PITX3:TPRX1	CTAATCCS	1e-39	-91.46	0	4698	0.2761	6734.1	0.2322
M04881_2.00:GCM1:GCM2	ATGCGGGTR	1e-39	-91.36	0	1138	0.0669	1288.2	0.0444
M05773_2.00:LEF1:TCF7:TCF7L1:TCF7L2	ASATCAAAG	1e-39	-91.17	0	1712	0.1006	2111.7	0.0728
M00821_2.00:AR:NR3C1:NR3C2:PGR	NAGGAACATN	1e-39	-91.12	0	4816	0.283	6926.3	0.2389
M02460_2.00:GMEB1:GMEB2	NBACGTMNN	1e-39	-91.1	0	5834	0.3428	8578.3	0.2958
M10503_2.00:ELF1:ELF2:ELF4:ELK1:ELK3:ELK4:ERF:ERG:ETS1:ETS2:ETV1:ETV2:ETV3:ETV3L:ETV4:ETV5:FEV:FLI1:GABPA	CMGGAAGTSAB	1e-39	-90.63	0	1423	0.0836	1694.8	0.0584
M00756_2.00:NHLH1:NHLH2	NGCAGCTGTN	1e-39	-90.47	0	3643	0.2141	5063.6	0.1746
M10504_2.00:ELF1:ELF2:ELF4:ELK1:ELK3:ELK4:ERF:ERG:ETS1:ETS2:ETV1:ETV2:ETV3:ETV3L:ETV4:ETV5:FEV:FLI1:GABPA	CACTTCCGG	1e-39	-90.44	0	408	0.024	336.1	0.0116
M00368_2.00:NR1H2:NR1H3:NR1H4:NR2C1:NR2C2:NR2F1:NR2F2:NR2F6:RARA:RARB:RARG:RORA:RORB:RORC:RXRA:RXRB:RXRG:VDR	NGAGGTCAHN	1e-39	-90.37	0	8097	0.4758	12341.3	0.4256
M01715_2.00:MITF:TFE3:TFEB:TFEC	BCDCGTGAYN	1e-39	-90.32	0	2955	0.1736	3991.8	0.1377
M10161_2.00:MAZ	GGGGGAGGGGAGGG	1e-39	-90.23	0	1164	0.0684	1328.5	0.0458
M08854_2.00:PRDM1	YCACTTTCACTTTC	1e-39	-89.86	0	482	0.0283	425.9	0.0147
M08995_2.00:PRDM1	YCACTTTCACTTTC	1e-39	-89.86	0	482	0.0283	425.9	0.0147
M00229_2.00:EGR2	NMMCACGCA	1e-38	-89.73	0	6154	0.3616	9113.7	0.3143
M04791_2.00:EHF:ELF1:ELF2:ELF4:ELK1:ELK3:ELK4:ERF:ERG:ETS1:ETS2:ETV1:ETV2:ETV3:ETV3L:ETV4:ETV5:FEV:FLI1:GABPA	NACCGGAAGTG	1e-38	-89.68	0	336	0.0197	255.9	0.0088
M04284_2.00:JUN:JUNB:JUND	SATGACTCATS	1e-38	-89.43	0	724	0.0425	732.1	0.0252
M07953_2.00:ELF1:ELF2:ELF4:ELK1:ELK3:ELK4:ERF:ERG:ETS1:ETS2:ETV1:ETV2:ETV3:ETV3L:ETV4:ETV5:FEV:FLI1:GABPA	VRCCGGAAGTG	1e-38	-89.35	0	385	0.0226	311.7	0.0107
M04930_2.00:CRX:DMBX1:DPRX:GSC:GSC2:OTX1:OTX2:PITX1:PITX2:PITX3:TPRX1	YTAATCCC	1e-38	-89.06	0	4664	0.2741	6696.3	0.2309
M05132_2.00:RHOXF2:RHOXF2B	YTAATCCC	1e-38	-89.06	0	4664	0.2741	6696.3	0.2309
M11227_2.00:NFKB1:RELA:RELB	GGAAAGTCCCYTBYGC	1e-38	-88.13	0	260	0.0153	175.2	0.006
M10300_2.00:SP1:SP3:SP4:SP5:SP8:SP9	NGGGGGCGGGGCB	1e-38	-87.84	0	958	0.0563	1050.7	0.0362
M11254_2.00:RUNX1:RUNX2:RUNX3	TGTGGTBNV	1e-38	-87.76	0	6068	0.3566	8987.1	0.3099
M09506_2.00:EGR1:EGR2:EGR3:EGR4	CRCCCACGCA	1e-38	-87.61	0	1204	0.0707	1393.1	0.048
M09877_2.00:ATOH1	SCAGCTGGTG	1e-37	-87.05	0	2811	0.1652	3787	0.1306
M05838_2.00:JUN:JUNB:JUND	ATGACTCA	1e-37	-86.67	0	3333	0.1959	4600.3	0.1586
M10594_2.00:GATA1:GATA2:GATA3:GATA4:GATA5:GATA6	BVVGATAGBB	1e-37	-86.2	0	9344	0.5491	14492.6	0.4998
M03082_2.00:CRX:DMBX1:DPRX:GSC:GSC2:OTX1:OTX2:PITX1:PITX2:PITX3:TPRX1	NYTAATCCC	1e-37	-85.93	0	4759	0.2796	6871.1	0.237
M05833_2.00:MITF:TFE3:TFEB:TFEC	CACGTGAC	1e-37	-85.9	0	1981	0.1164	2532.8	0.0873
M10874_2.00:HSF2:HSF4	AGAAMAGAAMAGAAM	1e-37	-85.33	0	423	0.0249	362.7	0.0125
M11263_2.00:RUNX1:RUNX2:RUNX3	TGTGGT	1e-37	-85.23	0	8337	0.4899	12789.6	0.4411
M07588_2.00:ZNF132	TCCTTCCCHCTYTCC	1e-37	-85.2	0	641	0.0377	634.1	0.0219
M02385_2.00:MYRF	TGGTACCA	1e-36	-85.08	0	341	0.02	267.8	0.0092
M10166_2.00:SP1:SP3:SP4:SP8:SP9	GCCCCGCCCCS	1e-36	-84.95	0	1218	0.0716	1422	0.049
M09053_2.00:EHF:ELF1:ELF2:ELF3:ELF4:ELF5:ETV6:ETV7:FEV	RAACCAGGAAGTRGS	1e-36	-84.53	0	533	0.0313	498.7	0.0172
M09071_2.00:EHF:ELF1:ELF2:ELF3:ELF4:ELF5:ETV6:ETV7:FEV	RAACCAGGAAGTRGS	1e-36	-84.53	0	533	0.0313	498.7	0.0172
M10519_2.00:SPI1:SPIB:SPIC	AAAAAGMGGAAGTWNCW	1e-36	-83.97	0	180	0.0106	100.7	0.0035
M05133_2.00:RHOXF2:RHOXF2B	CTAATCCC	1e-36	-83.92	0	4843	0.2846	7021.7	0.2421
M10239_2.00:ZNF148	CCCCKCCCCCNC	1e-36	-83.88	0	1484	0.0872	1808.9	0.0624
M08787_2.00:BACH1:BACH2	RTGACTCAGCA	1e-36	-83.4	0	606	0.0356	593.2	0.0205
M08293_2.00:KLF1:KLF12:KLF2:KLF3:KLF4:KLF5:KLF6:KLF7:KLF8	CCCCGGCCMCRCCCH	1e-35	-82.89	0	858	0.0504	928.7	0.032
M02712_2.00:RELA	SGGGTTTTTCCS	1e-35	-82.69	0	568	0.0334	546.1	0.0188
M04796_2.00:ELF1:ELF2:ELF4:ELK1:ELK3:ELK4:ERF:ERG:ETS1:ETS2:ETV1:ETV2:ETV3:ETV3L:ETV4:ETV5:FEV:FLI1:GABPA	NACCGGAAGTR	1e-35	-82.66	0	305	0.0179	230.9	0.008
M00473_2.00:HOXA13:HOXB13:HOXC13:HOXD13	WTTTAYDRG	1e-35	-82.41	0	10785	0.6337	17009.5	0.5866
M10002_2.00:FOS:FOSB:FOSL1:FOSL2	TGACTCAB	1e-35	-82.39	0	6120	0.3596	9116	0.3144
M05785_2.00:SOX1:SOX10:SOX11:SOX12:SOX13:SOX14:SOX15:SOX17:SOX18:SOX2:SOX21:SOX3:SOX30:SOX4:SOX5:SOX6:SOX7:SOX8:SOX9:SRY	CCGAACAATG	1e-35	-81.77	0	912	0.0536	1005.7	0.0347
M01746_2.00:MSC:TCF21	AACATATGK	1e-35	-81.7	0	1915	0.1125	2453.2	0.0846
M03111_2.00:CRX:DMBX1:DPRX:GSC:GSC2:OTX1:OTX2:PITX1:PITX2:PITX3:TPRX1	NYTAATCCC	1e-35	-81.45	0	4797	0.2819	6965.2	0.2402
M00177_2.00:IRF5	NANCGAAACY	1e-35	-81.32	0	5328	0.3131	7827.9	0.2699
M02803_2.00:BHLHA15	ACCATATGGT	1e-35	-81.29	0	657	0.0386	664.5	0.0229
M06282_2.00:CRX:DMBX1:DPRX:GSC:GSC2:OTX1:OTX2:PITX1:PITX2:PITX3:TPRX1	TTAATCC	1e-35	-81.28	0	4821	0.2833	7005.7	0.2416
M01729_2.00:BHLHE22:BHLHE23	ARCATATGGY	1e-35	-81.08	0	2057	0.1209	2669.5	0.0921
M10299_2.00:SP1:SP3:SP4:SP5:SP8:SP9	GGGGCGGGGC	1e-35	-80.73	0	1554	0.0913	1923.9	0.0663
M09975_2.00:BACH1:BACH2	ANSATGAGTCATGVT	1e-35	-80.68	0	176	0.0103	99.4	0.0034
M09500_2.00:PRDM1	ACTTTCACTTTC	1e-34	-80.53	0	875	0.0514	958.8	0.0331
M01731_2.00:NPAS2	NSCACGTGTN	1e-34	-80.52	0	1990	0.1169	2572	0.0887
M05777_2.00:LEF1:TCF7:TCF7L1:TCF7L2	ASATCAAAG	1e-34	-80.27	0	1746	0.1026	2208.2	0.0762
M10241_2.00:KLF15	GAGBNGGGGMGTDG	1e-34	-80.24	0	1164	0.0684	1362.8	0.047
M09971_2.00:BATF:BATF3	GWDATGAGTC	1e-34	-80.15	0	2379	0.1398	3162.9	0.1091
M10511_2.00:ELF1:ELF2:ELF4:ELK1:ELK3:ELK4:ERF:ERG:ETS1:ETS2:ETV1:ETV2:ETV3:ETV3L:ETV4:ETV5:FEV:FLI1:GABPA	MACTTCCTKTB	1e-34	-80.04	0	5444	0.3199	8026	0.2768
M05384_2.00:CRX:DMBX1:DPRX:GSC:GSC2:OTX1:OTX2:PITX1:PITX2:PITX3:TPRX1	CTAATCCS	1e-34	-79.75	0	4739	0.2785	6884.4	0.2374
M00185_2.00:ESR1:ESR2:NR1D1:NR1D2:NR1H2:NR1H3:NR1H4:NR2C1:NR2C2:NR2F1:NR2F2:NR2F6:NR4A1:NR5A2:NR6A1:PPARA:PPARD:PPARG:RARA:RARB:RARG:RORA:RORB:RORC:RXRA:RXRB:RXRG	RAGGTCAH	1e-34	-79.16	0	8486	0.4986	13094.1	0.4516
M05750_2.00:SOX1:SOX10:SOX11:SOX12:SOX13:SOX14:SOX15:SOX17:SOX18:SOX2:SOX21:SOX3:SOX30:SOX4:SOX5:SOX6:SOX7:SOX8:SOX9:SRY	BYATTGTTCT	1e-34	-78.75	0	5285	0.3106	7777.4	0.2682
M09667_2.00:EHF:ELF1:ELF2:ELF3:ELF4:ELF5:ELK1:ELK3:ELK4:ERF:ERG:ETS1:ETS2:ETV1:ETV2:ETV3:ETV3L:ETV4:ETV5:ETV6:ETV7:FEV:FLI1:GABPA:SPDEF	AAHCMGGAAGT	1e-34	-78.68	0	1576	0.0926	1964	0.0677
M08793_2.00:NFE2:NFE2L1:NFE2L2:NFE2L3	VVATGACTCAGCA	1e-34	-78.48	0	315	0.0185	247.1	0.0085
M10016_2.00:MAF:MAFA:MAFB:MAFG:MAFK	TGASTCAGCDY	1e-33	-78.03	0	657	0.0386	672.1	0.0232
M08113_2.00:ELF1:ELF2:ELF4:ELK1:ELK3:ELK4:ERF:ERG:ETS1:ETS2:ETV1:ETV2:ETV3:ETV3L:ETV4:ETV5:FEV:FLI1:GABPA	CCGGAAGTGGV	1e-33	-77.94	0	373	0.0219	315.7	0.0109
M00390_2.00:HOXA10:HOXA11:HOXA9:HOXB9:HOXC10:HOXC11:HOXC12:HOXC9:HOXD10:HOXD11:HOXD12:HOXD9	WTTTAYGABN	1e-33	-77.91	0	7878	0.4629	12079.7	0.4166
M04079_2.00:MITF:TFEC	AHCATGTGACY	1e-33	-77.53	0	1388	0.0816	1694.8	0.0584
M08358_2.00:ZNF467	CCCTCCCCCYCC	1e-33	-76.92	0	1100	0.0646	1283.7	0.0443
M00622_2.00:EGR1:EGR2:EGR3:EGR4	CGCCCACG	1e-33	-76.86	0	2235	0.1313	2960.6	0.1021
M04907_2.00:ARX:BARHL1:BARHL2:BARX1:BARX2:BSX:DLX1:DLX2:DLX3:DLX4:DLX5:DLX6:EMX2:EN1:EN2:GBX1:GBX2:GSX1:GSX2:HOXA1:HOXA2:HOXA3:HOXB1:HOXB2:HOXB3:HOXD1:HOXD3:ISX:LHX1:LHX5:MEOX1:MNX1:MSX1:MSX2:NANOG:NANOGP8:NKX1-1:NKX1-2:PDX1:PHOX2A:PHOX2B:PROP1:SHOX:SHOX2:UNCX:VAX1:VAX2:VSX2	VTAATTGS	1e-33	-76.86	0	4922	0.2892	7202.3	0.2484
M03532_2.00:LEF1:TCF7:TCF7L1:TCF7L2	AAAGATCAAAGG	1e-33	-76.58	0	238	0.014	165.8	0.0057
M04167_2.00:ATOH1	AVCATATGKC	1e-33	-76.5	0	1260	0.074	1513.5	0.0522
M03112_2.00:ARX:BARHL1:BARHL2:BARX1:BARX2:BSX:DLX1:DLX2:DLX3:DLX4:DLX5:DLX6:EN1:EN2:GBX1:GBX2:GSX1:GSX2:HOXA1:HOXA2:HOXA3:HOXB1:HOXB2:HOXB3:HOXD1:HOXD3:ISX:LHX1:LHX5:MEOX1:MNX1:MSX1:MSX2:NANOG:NANOGP8:NKX1-1:NKX1-2:PDX1:PROP1:SHOX:SHOX2:UNCX:VAX1:VAX2:VSX2	NTAATTRB	1e-33	-76.48	0	4980	0.2926	7299.7	0.2517
M04283_2.00:JUN:JUNB:JUND	SATGASTCATC	1e-33	-76.24	0	728	0.0428	771.7	0.0266
M08326_2.00:SP2	CCCCGCCCC	1e-32	-75.66	0	1255	0.0737	1509.8	0.0521
M05251_2.00:CRX:DMBX1:DPRX:GSC:GSC2:OTX1:OTX2:PITX1:PITX2:PITX3:TPRX1	HTAATCCN	1e-32	-75.62	0	4834	0.2841	7069.7	0.2438
M10298_2.00:SP1:SP3:SP4:SP5:SP8:SP9	VGGGGCGGGGC	1e-32	-75.42	0	1426	0.0838	1758.1	0.0606
M04513_2.00:KLF15	GCCACGCCCCCC	1e-32	-75.27	0	1150	0.0676	1360.9	0.0469
M11261_2.00:RUNX1:RUNX2:RUNX3	TGTGGTT	1e-32	-75.19	0	6210	0.3649	9323.7	0.3215
M10297_2.00:SP1:SP3:SP4:SP5:SP8:SP9	GGNDGGGGGCGGGG	1e-32	-74.89	0	1191	0.07	1420.4	0.049
M05747_2.00:NFIA:NFIB:NFIC:NFIX	BTTGGCNNNGTGCCARN	1e-32	-74.53	0	200	0.0118	128.6	0.0044
M03808_2.00:CRX:DMBX1:DPRX:GSC:GSC2:OTX1:OTX2:PITX1:PITX2:PITX3:TPRX1	HTAATCCS	1e-32	-74.48	0	4596	0.2701	6694	0.2308
M11243_2.00:RELA	GGGTTTTTCCV	1e-32	-74.28	0	327	0.0192	267.9	0.0092
M08095_2.00:ZBTB7A	BSCACTTCCGGSN	1e-32	-74.26	0	392	0.023	344.3	0.0119
M11309_2.00:SOX1:SOX10:SOX11:SOX12:SOX13:SOX14:SOX15:SOX17:SOX18:SOX2:SOX21:SOX3:SOX30:SOX4:SOX5:SOX6:SOX7:SOX8:SOX9:SRY	YWAACAATAN	1e-32	-74.04	0	4130	0.2427	5947.9	0.2051
M05748_2.00:NFIA:NFIB:NFIC:NFIX	NTTGGCRNNDTGCCAAN	1e-32	-73.71	0	158	0.0093	88.6	0.0031
M00793_2.00:FOXC2:FOXJ3:FOXK2:FOXP1:FOXP2:FOXP3:FOXP4	NGTAAACAA	1e-31	-73.55	0	7002	0.4114	10651	0.3673
M04200_2.00:BHLHE22:BHLHE23	AMCATATGKT	1e-31	-73.5	0	1071	0.0629	1254.2	0.0433
M04990_2.00:BARHL1:BARHL2:BARX1:BARX2:BSX:DLX2:DLX3:EMX1:EMX2:ESX1:EVX1:EVX2:GBX1:GBX2:HESX1:HMX1:HMX2:HMX3:HOXA1:HOXA2:HOXA3:HOXA4:HOXA5:HOXB1:HOXB2:HOXB3:HOXB4:HOXB5:HOXC4:HOXC5:HOXD1:HOXD12:HOXD3:HOXD4:LBX1:LBX2:MEOX1:MEOX2:MNX1:MSX1:MSX2:NANOG:NANOGP8:NKX1-1:NKX1-2:PDX1:RAX:RAX2:TLX1:TLX3:VENTX	NTAATGAY	1e-31	-72.91	0	8693	0.5108	13502.9	0.4657
M07792_2.00:MAX	VRRGCACGTGG	1e-31	-72.87	0	1637	0.0962	2080.9	0.0718
M02384_2.00:MYRF	TGGTACCR	1e-31	-72.79	0	359	0.0211	307	0.0106
M04929_2.00:CRX:DMBX1:DPRX:GSC:GSC2:OTX1:OTX2:PITX1:PITX2:PITX3:TPRX1	BTAATCCN	1e-31	-72.77	0	6984	0.4104	10628.7	0.3665
M00389_2.00:HOXA13:HOXB13:HOXC13:HOXD13	TTTTATDRGN	1e-31	-72.76	0	10335	0.6073	16316.2	0.5627
M09529_2.00:EHF:ELF1:ELF2:ELF3:ELF4:ELF5:ELK1:ELK3:ELK4:ERF:ERG:ETS1:ETS2:ETV1:ETV2:ETV3:ETV3L:ETV4:ETV5:ETV6:ETV7:FEV:FLI1:GABPA:SPDEF	AVCCGGAAGT	1e-31	-72.42	0	512	0.0301	497.7	0.0172
M09928_2.00:CEBPA:CEBPB:CEBPE	ATTDCVWMAB	1e-31	-72.4	0	7515	0.4416	11519.5	0.3973
M01754_2.00:ATOH1	RACATATGGN	1e-31	-71.57	0	2279	0.1339	3056.3	0.1054
M09636_2.00:NFIA:NFIB:NFIC:NFIX	CYTGGCABNSTGCCAR	1e-31	-71.42	0	248	0.0146	182.4	0.0063
M09603_2.00:AR:NR3C1:NR3C2:PGR	GVACAGNMTGTYCTB	1e-31	-71.4	0	663	0.039	697.2	0.024
M11253_2.00:RUNX1:RUNX2:RUNX3	CCACACCA	1e-30	-71.34	0	5720	0.3361	8549.6	0.2948
M09520_2.00:ONECUT1:ONECUT2:ONECUT3	DGATCRATAN	1e-30	-71.09	0	1558	0.0916	1971.4	0.068
M03057_2.00:FOXC2:FOXD1:FOXD2:FOXD3:FOXG1:FOXI1:FOXI2:FOXI3:FOXJ2:FOXJ3:FOXK1:FOXK2:FOXP1:FOXP3:FOXP4	RTAAACAA	1e-30	-70.92	0	5638	0.3313	8418.6	0.2903
M04710_2.00:ELF1:ELF2:ELF4:ELK1:ELK3:ELK4:ERF:ERG:ETS1:ETS2:ETV1:ETV2:ETV3:ETV3L:ETV4:ETV5:FEV:FLI1:GABPA	NACCGGAAGTD	1e-30	-70.69	0	371	0.0218	325.8	0.0112
M06548_2.00:BARHL1:BARHL2:HOXA6:HOXB6:HOXB8:HOXC6:HOXC8:HOXD8:NKX1-1:NKX1-2	TTAATTG	1e-30	-70.63	0	5284	0.3105	7841.2	0.2704
M04746_2.00:EHF:ELF1:ELF2:ELF3:ELF4:ELF5:ELK1:ELK3:ELK4:ERF:ERG:ETS1:ETS2:ETV1:ETV2:ETV3:ETV3L:ETV4:ETV5:ETV6:ETV7:FEV:FLI1:GABPA:SPDEF	AACCCGGAAGTR	1e-30	-70.62	0	468	0.0275	445.8	0.0154
M04934_2.00:HOXA10:HOXA11:HOXA5:HOXA6:HOXA7:HOXA9:HOXB5:HOXB6:HOXB8:HOXB9:HOXC10:HOXC11:HOXC5:HOXC6:HOXC8:HOXC9:HOXD10:HOXD11:HOXD8:HOXD9	SBTTWATKGC	1e-30	-70.45	0	5392	0.3168	8019.9	0.2766
M03043_2.00:FOXC1:FOXC2:FOXD1:FOXD2:FOXD3:FOXD4:FOXD4L1:FOXD4L3:FOXD4L4:FOXD4L5:FOXD4L6:FOXE1:FOXE3:FOXF1:FOXF2:FOXG1:FOXI1:FOXI3:FOXJ3:FOXL1:FOXL2:FOXS1	GTAAACA	1e-30	-70.29	0	9437	0.5545	14795.8	0.5102
M09768_2.00:ARID3A:ARID3B:ARID3C	THRATTAATN	1e-30	-70.23	0	5582	0.328	8332.5	0.2874
M06502_2.00:CRX:DMBX1:DPRX:GSC:GSC2:OTX1:OTX2:PITX1:PITX2:PITX3:TPRX1	TAATCC	1e-30	-70.14	0	5746	0.3376	8602.2	0.2967
M03968_2.00:NFIA:NFIB:NFIC:NFIX	TTGGCANNNTGCCAA	1e-30	-70.03	0	160	0.0094	93.6	0.0032
M02148_2.00:ALX1:ALX3:ALX4:ARX:BARHL1:BARHL2:BSX:DRGX:ESX1:EVX1:EVX2:GBX1:GBX2:HESX1:LBX1:LBX2:MEOX2:MIXL1:MSX1:MSX2:PHOX2A:PHOX2B:PROP1:PRRX1:PRRX2:RAX:RAX2:SHOX:SHOX2:TLX1:TLX3:UNCX:VSX1:VSX2	YTAATTAG	1e-30	-70.03	0	482	0.0283	464	0.016
M09388_2.00:SOX1:SOX10:SOX11:SOX12:SOX13:SOX14:SOX15:SOX17:SOX18:SOX2:SOX21:SOX3:SOX30:SOX4:SOX5:SOX6:SOX7:SOX8:SOX9:SRY	YCCTTTGTTCYY	1e-30	-69.91	0	2601	0.1528	3562.1	0.1228
M09410_2.00:SOX1:SOX10:SOX11:SOX12:SOX13:SOX14:SOX15:SOX17:SOX18:SOX2:SOX21:SOX3:SOX30:SOX4:SOX5:SOX6:SOX7:SOX8:SOX9:SRY	YCCTTTGTTCYY	1e-30	-69.91	0	2601	0.1528	3562.1	0.1228
M05023_2.00:CRX:DMBX1:DPRX:GSC:GSC2:OTX1:OTX2:PITX1:PITX2:PITX3:TPRX1	CTAATCCB	1e-30	-69.82	0	4887	0.2872	7201.6	0.2483
M05541_2.00:IRF4:IRF8	NCGAAACCGAAACYR	1e-30	-69.82	0	109	0.0064	48.8	0.0017
M09113_2.00:FOXI1:FOXJ3:FOXK1:FOXK2	RNGTAAACAVS	1e-30	-69.63	0	4406	0.2589	6424.9	0.2216
M05549_2.00:IRF9	DCGAAACCGAAACTD	1e-30	-69.56	0	129	0.0076	65.1	0.0022
M09350_2.00:REL:RELA	TGGMATTTCCCTWCH	1e-30	-69.55	0	366	0.0215	321.7	0.0111
M09353_2.00:REL:RELA	TGGMATTTCCCTWCH	1e-30	-69.55	0	366	0.0215	321.7	0.0111
M10471_2.00:EHF:ELF1:ELF2:ELF3:ELF4:ELF5:ETV6:ETV7:SPIC	YTACTTCCTG	1e-30	-69.54	0	324	0.019	271.3	0.0094
M05252_2.00:CRX:DMBX1:DPRX:GSC:GSC2:OTX1:OTX2:PITX1:PITX2:PITX3:TPRX1	CTAATCCC	1e-30	-69.26	0	4854	0.2852	7152.5	0.2467
M03026_2.00:FOXC1:FOXC2:FOXD1:FOXD2:FOXD3:FOXD4:FOXD4L1:FOXD4L3:FOXD4L4:FOXD4L5:FOXD4L6:FOXE1:FOXF1:FOXG1:FOXI1:FOXI2:FOXI3:FOXJ2:FOXJ3:FOXK1:FOXK2:FOXL1:FOXL2:FOXS1	GTAAACA	1e-30	-69.23	0	4570	0.2685	6692.6	0.2308
M03054_2.00:FOXC1:FOXC2:FOXD1:FOXD2:FOXD3:FOXD4:FOXD4L1:FOXD4L3:FOXD4L4:FOXD4L5:FOXD4L6:FOXE1:FOXG1:FOXI1:FOXI2:FOXI3:FOXJ3:FOXK2:FOXL1:FOXL2:FOXS1	GTAAACA	1e-30	-69.23	0	4570	0.2685	6692.6	0.2308
M10015_2.00:MAF:MAFA:MAFB:MAFG:MAFK	TGCTGASTC	1e-30	-69.11	0	596	0.035	614.7	0.0212
M10091_2.00:ZEB1:ZEB2	SYGCACCTGKGC	1e-29	-69.08	0	1613	0.0948	2062.7	0.0711
M08776_2.00:ARNTL	CCACGTGMC	1e-29	-69.04	0	2254	0.1324	3032.3	0.1046
M07844_2.00:ZNF263	CCYCYYCCTCCTCCC	1e-29	-68.89	0	718	0.0422	778.8	0.0269
M02996_2.00:ELF1:ELF2:ELF4:ELK1:ELK3:ELK4:ERF:ERG:ETS1:ETS2:ETV1:ETV2:ETV3:ETV3L:ETV4:ETV5:FEV:FLI1:GABPA	ACCGGAAGTR	1e-29	-68.88	0	312	0.0183	258.8	0.0089
M10135_2.00:MZF1	GTGGGGAGGR	1e-29	-68.59	0	4041	0.2375	5845.4	0.2016
M11334_2.00:SOX1:SOX10:SOX11:SOX12:SOX13:SOX14:SOX15:SOX17:SOX18:SOX2:SOX21:SOX3:SOX30:SOX4:SOX5:SOX6:SOX7:SOX8:SOX9:SRY	ACAATGKSYKN	1e-29	-68.48	0	6520	0.3831	9895.6	0.3413
M04072_2.00:TFAP4	AHCATATGDT	1e-29	-68.39	0	3852	0.2263	5544.2	0.1912
M03131_2.00:HOXA10:HOXA11:HOXA9:HOXB9:HOXC10:HOXC11:HOXC12:HOXC9:HOXD10:HOXD11:HOXD12:HOXD9	DTTTTACGACY	1e-29	-68.09	0	1391	0.0817	1739	0.06
M04198_2.00:BHLHA15	ACCATATGGT	1e-29	-67.8	0	1172	0.0689	1420.3	0.049
M00538_2.00:HOXA10:HOXA11:HOXC10:HOXC11:HOXC12:HOXD10:HOXD11:HOXD12:MEOX2	DTTTAYKABN	1e-29	-67.71	0	9583	0.5631	15070.6	0.5197
M05536_2.00:IRF5	VCGAAACCGAAACY	1e-29	-67.69	0	258	0.0152	198.2	0.0068
M09050_2.00:EHF:ELF1:ELF2:ELF3:ELF4:ELF5:ELK1:ELK3:ELK4:ERF:ERG:ETS1:ETS2:ETV1:ETV2:ETV3:ETV3L:ETV4:ETV5:ETV6:ETV7:FEV:FLI1:GABPA:SPDEF	GAACCCGGAAGTGS	1e-29	-67.41	0	278	0.0163	221.8	0.0076
M05390_2.00:ALX1:ALX3:ALX4:ARX:DRGX:EMX1:EMX2:EN1:EN2:ESX1:GBX1:GBX2:GSX1:GSX2:HOXA2:HOXA3:HOXA4:HOXA5:HOXB2:HOXB3:HOXB4:HOXB5:HOXC4:HOXC5:HOXD3:HOXD4:ISL1:ISL2:ISX:LHX2:LHX3:LHX4:LHX9:MIXL1:MNX1:NKX1-1:NKX1-2:NOTO:OTP:PDX1:PHOX2A:PHOX2B:PROP1:PRRX1:PRRX2:RAX:RAX2:SEBOX:SHOX:SHOX2:UNCX:VAX1:VAX2:VSX1:VSX2	CTAATTRG	1e-29	-67.41	0	6676	0.3923	10164.9	0.3505
M02820_2.00:ATOH1	AACATATGBY	1e-29	-67.34	0	1512	0.0888	1921	0.0662
M08973_2.00:SNAI2	VBGCACCTGYY	1e-29	-67.34	0	2024	0.1189	2690	0.0928
M03022_2.00:FOXO1:FOXO3:FOXO4:FOXO6	GTAAACAA	1e-29	-66.91	0	4946	0.2906	7321.2	0.2525
M11257_2.00:RUNX1:RUNX2:RUNX3	ACCACAAA	1e-29	-66.89	0	4842	0.2845	7152.6	0.2467
M04793_2.00:ELF1:ELF2:ELF4:ELK1:ELK3:ELK4:ERF:ERG:ETS1:ETS2:ETV1:ETV2:ETV3:ETV3L:ETV4:ETV5:FEV:FLI1:GABPA	NACCGGAAGTR	1e-29	-66.88	0	257	0.0151	198.9	0.0069
M05849_2.00:ZNF282	CMTCCCACACC	1e-28	-66.76	0	1566	0.092	2003.3	0.0691
M05001_2.00:HOXA10:HOXA4:HOXA5:HOXA6:HOXA7:HOXA9:HOXB4:HOXB5:HOXB6:HOXB7:HOXB8:HOXB9:HOXC10:HOXC4:HOXC5:HOXC6:HOXC8:HOXC9:HOXD10:HOXD4:HOXD8:HOXD9:MNX1:PDX1	TTAATTRC	1e-28	-66.37	0	8761	0.5148	13680.4	0.4718
M01241_2.00:CRX:DMBX1:DPRX:GSC:GSC2:OTX1:OTX2:PITX1:PITX2:PITX3:TPRX1	WTAATCCN	1e-28	-66.33	0	4716	0.2771	6952.2	0.2398
M00233_2.00:EGR1:EGR2:EGR3:EGR4	CGCCCMCGCD	1e-28	-65.7	0	3184	0.1871	4502.6	0.1553
M09084_2.00:FOXI1:FOXI2:FOXI3:FOXJ1:FOXJ2:FOXJ3:FOXK2:FOXP3	WAAAYAAACA	1e-28	-65.43	0	4672	0.2745	6888.1	0.2375
M09100_2.00:FOXI1:FOXI2:FOXI3:FOXJ1:FOXJ2:FOXJ3:FOXK2:FOXP3	WAAAYAAACA	1e-28	-65.43	0	4672	0.2745	6888.1	0.2375
M10488_2.00:ELF1:ELF2:ELF4:ELK1:ELK3:ELK4:ERF:ERG:ETS1:ETS2:ETV1:ETV2:ETV3:ETV3L:ETV4:ETV5:FEV:FLI1:GABPA	YSMRCCGGAAGTNM	1e-28	-65.25	0	405	0.0238	377.1	0.013
M02257_2.00:IRF9	AACGAAACTA	1e-28	-65.21	0	5202	0.3057	7753.5	0.2674
M10748_2.00:PBX1:PBX2:PBX3:PBX4	ATCAATCAA	1e-28	-65.2	0	4717	0.2772	6963.4	0.2401
M00356_2.00:PAX3:PAX7	AKTACAYGGTN	1e-28	-64.92	0	3641	0.2139	5234	0.1805
M10529_2.00:FOXC1:FOXC2:FOXD1:FOXD2:FOXD3:FOXD4:FOXD4L1:FOXD4L3:FOXD4L4:FOXD4L5:FOXD4L6:FOXE1:FOXE3:FOXF1:FOXF2:FOXI1:FOXL1:FOXL2:FOXS1	ATGTTTAT	1e-28	-64.62	0	4227	0.2484	6175.9	0.213
M00733_2.00:TBR1	AGGTGTGAAN	1e-27	-64.3	0	2242	0.1317	3041.2	0.1049
M11241_2.00:RELA	AAAGTCCC	1e-27	-64.22	0	977	0.0574	1154.2	0.0398
M06275_2.00:HOXA10:HOXA5:HOXA6:HOXA7:HOXA9:HOXB4:HOXB5:HOXB6:HOXB7:HOXB8:HOXB9:HOXC10:HOXC5:HOXC6:HOXC8:HOXC9:HOXD10:HOXD8:HOXD9	TTTAATKA	1e-27	-64.19	0	7414	0.4357	11427.8	0.3941
M09237_2.00:IRF1:IRF2	RAAARWGAAAGTGAAAGTRR	1e-27	-64.09	0	87	0.0051	34.5	0.0012
M09245_2.00:IRF1:IRF2	RAAARWGAAAGTGAAAGTRR	1e-27	-64.09	0	87	0.0051	34.5	0.0012
M05746_2.00:NFIA:NFIB:NFIC:NFIX	NTTGGCDNNDTGCCARN	1e-27	-64	0	191	0.0112	130.7	0.0045
M05047_2.00:NKX2-1:NKX2-2:NKX2-3:NKX2-4:NKX2-5:NKX2-6:NKX2-8	STCAACGMB	1e-27	-63.84	0	4884	0.287	7246.2	0.2499
M03333_2.00:IRF5	AACCGAAACYA	1e-27	-63.67	0	216	0.0127	157.5	0.0054
M04780_2.00:ELF1:ELF2:ELF4:ELK1:ELK3:ELK4:ERF:ERG:ETS1:ETS2:ETV1:ETV2:ETV3:ETV3L:ETV4:ETV5:FEV:FLI1:GABPA	NRCCGGAAGYV	1e-27	-63.66	0	642	0.0377	690.1	0.0238
M08843_2.00:NFE2:NFE2L1:NFE2L2:NFE2L3	ATGACTCAGCARWW	1e-27	-63.54	0	157	0.0092	96.4	0.0033
M05893_2.00:SOX1:SOX10:SOX11:SOX12:SOX13:SOX14:SOX15:SOX17:SOX18:SOX2:SOX21:SOX3:SOX30:SOX4:SOX5:SOX6:SOX7:SOX8:SOX9:SRY	CYATTGTTTT	1e-27	-63.48	0	7588	0.4459	11726.1	0.4044
M09488_2.00:BACH1:BACH2	ATGACTCAGCANWWT	1e-27	-63.02	0	142	0.0083	82.6	0.0028
M05821_2.00:TBX1:TBX10	KDAGGTGTGAAR	1e-27	-62.75	0	712	0.0418	788.8	0.0272
M01864_2.00:EGR1:EGR2:EGR3:EGR4	CCCMCGCAN	1e-27	-62.25	0	3209	0.1886	4566	0.1575
M04974_2.00:HOXA10:HOXA4:HOXA5:HOXA6:HOXA7:HOXA9:HOXB4:HOXB5:HOXB6:HOXB7:HOXB8:HOXB9:HOXC10:HOXC4:HOXC5:HOXC6:HOXC8:HOXC9:HOXD10:HOXD4:HOXD8:HOXD9:MNX1:PDX1	VYTAATTACC	1e-26	-62.13	0	3761	0.221	5447	0.1878
M03236_2.00:CRX:DMBX1:DPRX:GSC:GSC2:OTX1:OTX2:PITX1:PITX2:PITX3:TPRX1	NYTAATCCBH	1e-26	-61.2	0	4789	0.2814	7114.5	0.2453
M01916_2.00:FBXL19:KDM2A:KDM2B	NNTACGNN	1e-26	-60.95	0	9683	0.569	15309	0.5279
M10360_2.00:ZNF467	TGGGAGCTCCCC	1e-26	-60.89	0	90	0.0053	38.7	0.0013
M06211_2.00:HOXA10:HOXA11:HOXA6:HOXA9:HOXB6:HOXB8:HOXB9:HOXC10:HOXC11:HOXC12:HOXC5:HOXC6:HOXC8:HOXC9:HOXD10:HOXD11:HOXD12:HOXD8:HOXD9	TCATAAAA	1e-26	-60.86	0	4781	0.2809	7104.6	0.245
M03315_2.00:POU3F1	WTATGCWAATTA	1e-26	-60.42	0	1410	0.0829	1801.6	0.0621
M02468_2.00:GMEB1:GMEB2	NBACGYANN	1e-26	-60.35	0	6400	0.3761	9772.4	0.337
M06223_2.00:CDX1:CDX2:CDX4:HOXA13:HOXC13	WTTTATTA	1e-26	-60.25	0	8766	0.5151	13750	0.4742
M03317_2.00:POU3F4	TATGCAAAT	1e-25	-59.82	0	1552	0.0912	2016.7	0.0695
M03046_2.00:FOXC2:FOXD1:FOXD2:FOXD3:FOXG1:FOXI1:FOXI2:FOXI3:FOXJ2:FOXJ3:FOXK1:FOXK2:FOXP1:FOXP3	RTAAACAA	1e-25	-59.81	0	8949	0.5259	14066.5	0.4851
M09428_2.00:EOMES:TBR1:TBX21	GGAGGTGTGARD	1e-25	-59.77	0	3894	0.2288	5678.7	0.1958
M10258_2.00:SP7:SP8:SP9	CCGCCCCCKVG	1e-25	-59.62	0	2092	0.1229	2838.5	0.0979
M03068_2.00:GCM1:GCM2	BATGCGGGTA	1e-25	-59.57	0	648	0.0381	710.7	0.0245
M08298_2.00:KLF1:KLF12:KLF2:KLF3:KLF4:KLF5:KLF6:KLF7	GGCCCCGCCCH	1e-25	-59.57	0	1418	0.0833	1817.8	0.0627
M00470_2.00:HOXA10:HOXA11:HOXA5:HOXA6:HOXA7:HOXA9:HOXB5:HOXB6:HOXB8:HOXB9:HOXC10:HOXC11:HOXC5:HOXC6:HOXC8:HOXC9:HOXD10:HOXD11:HOXD8:HOXD9	NGTAATTAAN	1e-25	-59.54	0	3689	0.2168	5351.8	0.1846
M08853_2.00:SNAI2	KGCACCTGYY	1e-25	-59.39	0	2134	0.1254	2904.9	0.1002
M03078_2.00:ARX:BARHL1:BARHL2:BARX1:BARX2:BSX:DLX1:DLX2:DLX3:DLX4:DLX5:DLX6:EMX2:EN1:EN2:GBX1:GBX2:GSX1:GSX2:HOXA1:HOXA2:HOXA3:HOXB1:HOXB2:HOXB3:HOXD1:HOXD3:ISX:LHX1:LHX5:MEOX1:MNX1:MSX1:MSX2:NANOG:NANOGP8:NKX1-1:NKX1-2:PDX1:PHOX2A:PHOX2B:PROP1:SHOX:SHOX2:UNCX:VAX1:VAX2:VSX2	NTAATTRB	1e-25	-59.22	0	4661	0.2739	6923.5	0.2388
M10487_2.00:EHF:ELF1:ELF2:ELF3:ELF4:ELF5:ELK1:ELK3:ELK4:ERF:ERG:ETS1:ETS2:ETV1:ETV2:ETV3:ETV3L:ETV4:ETV5:ETV6:ETV7:FEV:FLI1:GABPA:SPDEF	RDAAGAGGAART	1e-25	-58.92	0	1638	0.0963	2150.1	0.0741
M04223_2.00:OLIG2:OLIG3	AACAGCTGTT	1e-25	-58.88	0	1058	0.0622	1291.2	0.0445
M10109_2.00:PRDM1	VAGRAAGKGAAAGG	1e-25	-58.72	0	485	0.0285	494.2	0.017
M05446_2.00:POU2F2	DTATGCWAATB	1e-25	-58.42	0	2049	0.1204	2779	0.0958
M05008_2.00:ALX1:ALX3:ALX4:ARX:BARX1:BARX2:BSX:DLX1:DLX2:DLX3:DLX6:DRGX:EMX1:EMX2:EN1:EN2:ESX1:EVX1:EVX2:GBX1:GBX2:GSX1:GSX2:HESX1:HOXA2:HOXA3:HOXB2:HOXB3:HOXD3:ISX:LBX1:LBX2:LHX1:LHX2:LHX3:LHX4:LHX5:LHX6:LHX8:LHX9:LMX1A:LMX1B:MEOX1:MIXL1:MNX1:MSX1:MSX2:NKX1-1:NKX1-2:NOBOX:NOTO:OTP:PDX1:PHOX2A:PHOX2B:PROP1:PRRX1:PRRX2:RAX:RAX2:SEBOX:SHOX:SHOX2:UNCX:VAX1:VAX2:VSX1:VSX2:ZFHX2:ZFHX3	STAATTGS	1e-25	-58.34	0	5117	0.3007	7676	0.2647
M09832_2.00:TWIST1:TWIST2	CACCTGG	1e-25	-58.17	0	8270	0.486	12931	0.4459
M02970_2.00:ELF1:ELF2:ELF4:ELK1:ELK3:ELK4:ERF:ERG:ETS1:ETS2:ETV1:ETV2:ETV3:ETV3L:ETV4:ETV5:FEV:FLI1:GABPA	ACCGGAAGTG	1e-25	-58.09	0	320	0.0188	286	0.0099
M02109_2.00:ALX1:ALX3:ALX4:ARX:DRGX:ESX1:GBX1:GBX2:HESX1:ISX:LHX3:LHX6:LHX8:LMX1A:LMX1B:MIXL1:OTP:PHOX2A:PHOX2B:PROP1:PRRX1:PRRX2:RAX:RAX2:SEBOX:SHOX:SHOX2:UNCX:VSX1:VSX2:ZFHX2	YTAATCAW	1e-25	-57.84	0	6375	0.3746	9755.1	0.3364
M08765_2.00:MITF:TFE3:TFEB:TFEC	YCACGTGACY	1e-25	-57.59	0	2191	0.1287	3003.2	0.1036
M05259_2.00:ALX1:ALX3:ALX4:ARX:BARX1:BARX2:BSX:DLX2:DLX3:DRGX:EMX1:EMX2:EN1:EN2:ESX1:EVX1:EVX2:GBX1:GBX2:GSX1:GSX2:HESX1:HOXA2:HOXA3:HOXB2:HOXB3:HOXD3:ISX:LBX1:LBX2:LHX1:LHX2:LHX3:LHX4:LHX5:LHX6:LHX8:LHX9:LMX1A:LMX1B:MEOX1:MIXL1:MNX1:MSX1:MSX2:NKX1-1:NKX1-2:NOBOX:NOTO:OTP:PDX1:PHOX2A:PHOX2B:PROP1:PRRX1:PRRX2:RAX:RAX2:SEBOX:SHOX:SHOX2:UNCX:VAX1:VAX2:VSX1:VSX2:ZFHX2	STAATTGS	1e-25	-57.59	0	5208	0.306	7831.8	0.2701
M05757_2.00:LEF1:TCF7:TCF7L1:TCF7L2	ACATCAAAG	1e-24	-57.38	0	1959	0.1151	2647.9	0.0913
M11116_2.00:NR1H4:NR1I2:NR1I3:VDR	GGGTVARBGGGGTSA	1e-24	-57.26	0	1003	0.0589	1218.2	0.042
M03475_2.00:NFIA:NFIB:NFIC:NFIX	YTGGCDNNDTGCCAA	1e-24	-57.07	0	210	0.0123	159.5	0.0055
M04754_2.00:ELF1:ELF2:ELF4:ELK1:ELK3:ELK4:ERF:ERG:ETS1:ETS2:ETV1:ETV2:ETV3:ETV3L:ETV4:ETV5:FEV:FLI1:GABPA	NRCCGGAAGTR	1e-24	-57	0	542	0.0318	574.3	0.0198
M09944_2.00:NFE2:NFE2L1:NFE2L2:NFE2L3	CRTGACTCAGCAR	1e-24	-56.79	0	387	0.0227	372.7	0.0129
M08789_2.00:NFE2:NFE2L1:NFE2L2:NFE2L3	ATGACTCAGCARWT	1e-24	-56.43	0	149	0.0088	95.3	0.0033
M09426_2.00:TBX2:TBX3:TBX4:TBX5	DRAGGTGGGAR	1e-24	-56.26	0	5999	0.3525	9147.4	0.3155
M01736_2.00:MITF:TFEC	NCACGTGAYN	1e-24	-55.98	0	3838	0.2255	5619.4	0.1938
M09533_2.00:EHF:ELF1:ELF2:ELF3:ELF4:ELF5:ETV6:ETV7:FEV	AVCAGGAAGT	1e-24	-55.95	0	3465	0.2036	5021.6	0.1732
M11314_2.00:LEF1:TCF7:TCF7L1:TCF7L2	TCAAAGG	1e-24	-55.92	0	8068	0.4741	12612.5	0.4349
M02719_2.00:SOX1:SOX10:SOX11:SOX12:SOX13:SOX14:SOX15:SOX17:SOX18:SOX2:SOX21:SOX3:SOX30:SOX4:SOX5:SOX6:SOX7:SOX8:SOX9:SRY	WAACAAT	1e-24	-55.77	0	4292	0.2522	6354	0.2191
M05128_2.00:ALX1:ALX3:ALX4:ARX:BARHL1:BARHL2:BARX1:BARX2:BSX:DLX1:DLX2:DLX3:DLX4:DLX5:DLX6:DRGX:EMX1:EMX2:EN1:EN2:ESX1:EVX1:EVX2:GBX1:GBX2:GSX1:GSX2:HESX1:HMX1:HMX2:HMX3:HOXA1:HOXA2:HOXA3:HOXA4:HOXA5:HOXA6:HOXB1:HOXB2:HOXB3:HOXB4:HOXB5:HOXB6:HOXB8:HOXC4:HOXC5:HOXC6:HOXD1:HOXD3:HOXD4:HOXD8:ISX:LHX1:LHX3:LHX4:LHX5:MEOX1:MEOX2:MIXL1:MNX1:MSX1:MSX2:NANOG:NANOGP8:NKX1-1:NKX1-2:NOTO:OTP:PDX1:PHOX2A:PHO…	STAATTRS	1e-24	-55.58	0	5308	0.3119	8014.9	0.2764
M05009_2.00:ALX1:ALX3:ALX4:ARX:BARX1:BARX2:BSX:DLX1:DLX2:DLX3:DLX6:DRGX:EMX1:EMX2:EN1:EN2:ESX1:EVX1:EVX2:GBX1:GBX2:GSX1:GSX2:HESX1:HOXA2:HOXA3:HOXB2:HOXB3:HOXD3:ISX:LBX1:LBX2:LHX1:LHX2:LHX3:LHX4:LHX5:LHX6:LHX8:LHX9:LMX1A:LMX1B:MEOX1:MIXL1:MNX1:MSX1:MSX2:NKX1-1:NKX1-2:NOBOX:NOTO:OTP:PDX1:PHOX2A:PHOX2B:PROP1:PRRX1:PRRX2:RAX:RAX2:SEBOX:SHOX:SHOX2:UNCX:VAX1:VAX2:VSX1:VSX2:ZFHX2:ZFHX3	STAATTGS	1e-24	-55.49	0	5207	0.306	7849.4	0.2707
M10003_2.00:FOS:FOSB:FOSL1:FOSL2	TGAGTCAK	1e-24	-55.38	0	4939	0.2902	7411.9	0.2556
M00817_2.00:ESR1:ESR2:ESRRA:ESRRB:ESRRG	CAAGGTCA	1e-23	-54.84	0	4153	0.244	6138	0.2117
M04878_2.00:GATA1:GATA2:GATA3:GATA4:GATA5:GATA6	WGATAACGATCW	1e-23	-54.66	0	286	0.0168	251.7	0.0087
M03154_2.00:ALX1:ALX3:ALX4:ARX:DRGX:EN1:EN2:ESX1:HESX1:ISX:LHX2:LHX3:LHX4:LHX6:LHX8:LHX9:LMX1A:LMX1B:MIXL1:NOBOX:OTP:PHOX2A:PHOX2B:PROP1:PRRX1:PRRX2:RAX:RAX2:SEBOX:SHOX:SHOX2:UNCX:VSX1:VSX2:ZFHX2	KTAATTRR	1e-23	-54.54	0	6307	0.3706	9675.8	0.3337
M09427_2.00:T:TBX19	TTVRCAGGDARGTGTGAADT	1e-23	-54.49	0	134	0.0079	82.4	0.0028
M09394_2.00:LEF1:TCF7:TCF7L1:TCF7L2	VVASATCAAAGGV	1e-23	-54.49	0	721	0.0424	827.8	0.0285
M09401_2.00:LEF1:TCF7:TCF7L1:TCF7L2	VVASATCAAAGGV	1e-23	-54.49	0	721	0.0424	827.8	0.0285
M04439_2.00:EGR1:EGR2:EGR3:EGR4	MMCGCCCACGCAC	1e-23	-54.43	0	316	0.0186	288.8	0.01
M03791_2.00:ALX1:ALX3:ALX4:ARX:BARHL1:BARHL2:BARX1:BARX2:BSX:DRGX:EMX1:EMX2:EN1:EN2:ESX1:EVX1:EVX2:GBX1:GBX2:GSX1:GSX2:HESX1:HMX1:HMX2:HMX3:HOXA1:HOXA2:HOXA3:HOXA4:HOXA5:HOXB1:HOXB2:HOXB3:HOXB4:HOXB5:HOXC4:HOXC5:HOXD3:HOXD4:LHX2:LHX3:LHX4:LHX9:MEOX1:MEOX2:MIXL1:MNX1:MSX1:MSX2:NKX1-1:NKX1-2:NOTO:OTP:PDX1:PHOX2A:PHOX2B:PROP1:PRRX1:PRRX2:RAX:RAX2:SEBOX:SHOX:SHOX2:TLX1:TLX2:TLX3:UNCX:VAX1:VAX2:VENTX:…	CTAATTAS	1e-23	-54.17	0	5504	0.3234	8350.9	0.288
M01805_2.00:FOS:FOSB:FOSL1:FOSL2	NNATGACKCAH	1e-23	-54.11	0	2449	0.1439	3427.9	0.1182
M11301_2.00:SOX1:SOX10:SOX11:SOX12:SOX13:SOX14:SOX15:SOX17:SOX18:SOX2:SOX21:SOX3:SOX30:SOX4:SOX5:SOX6:SOX7:SOX8:SOX9:SRY	ACAAAGARYTC	1e-23	-53.93	0	4471	0.2627	6661.6	0.2297
M04932_2.00:HOXA10:HOXA11:HOXA5:HOXA6:HOXA7:HOXA9:HOXB5:HOXB6:HOXB8:HOXB9:HOXC10:HOXC11:HOXC5:HOXC6:HOXC8:HOXC9:HOXD10:HOXD11:HOXD8:HOXD9	NNKTWATKGC	1e-23	-53.72	0	8281	0.4866	12996.7	0.4482
M00183_2.00:ESR1:ESR2:ESRRA:ESRRB:ESRRG	CAAGGTCAH	1e-23	-53.59	0	4174	0.2453	6182.1	0.2132
M10290_2.00:WT1	GSGGGKGGGGGS	1e-23	-53.32	0	1882	0.1106	2553.7	0.0881
M10295_2.00:SP1:SP3:SP4:SP5:SP8:SP9	GGGGCGGGGDS	1e-23	-53.27	0	1473	0.0866	1931.4	0.0666
M06425_2.00:HNF4A:HNF4G:NR2E1	AAAAGTCAAA	1e-22	-52.95	0	896	0.0527	1081.9	0.0373
M06558_2.00:HNF4A:HNF4G:NR2E1	AAAAGTCAAA	1e-22	-52.95	0	896	0.0527	1081.9	0.0373
M05231_2.00:CRX:DMBX1:DPRX:GSC:GSC2:OTX1:OTX2:PITX1:PITX2:PITX3:TPRX1	NTAATCCC	1e-22	-52.75	0	4875	0.2865	7331	0.2528
M06192_2.00:ELF1:ELF2:ELF4:ELK1:ELK3:ELK4:ERF:ERG:ETS1:ETS2:ETV1:ETV2:ETV3:ETV3L:ETV4:ETV5:ETV6:FEV:FLI1:GABPA	ACCGGAART	1e-22	-52.67	0	383	0.0225	376.1	0.013
M09818_2.00:AHR	GVSTTGCGTGNSWVBRB	1e-22	-52.24	0	319	0.0187	296.4	0.0102
M01494_2.00:EHF:ELF1:ELF2:ELF3:ELF4:ELF5:ELK1:ELK3:ELK4:ERF:ERG:ETS1:ETS2:ETV1:ETV2:ETV3:ETV3L:ETV4:ETV5:ETV6:ETV7:FEV:FLI1:GABPA:SPDEF	WNCCGGAAGT	1e-22	-51.45	0	3998	0.2349	5916.6	0.204
M08077_2.00:NFE2:NFE2L1:NFE2L2:NFE2L3	CASVATGACTCAGCA	1e-22	-51.42	0	136	0.008	87.8	0.003
M03017_2.00:FOXI1:FOXI2:FOXI3:FOXJ1:FOXJ2:FOXJ3:FOXK2:FOXP3	RTAAACAA	1e-22	-51.39	0	5787	0.3401	8846	0.3051
M01914_2.00:TET1	NNCRCGYTN	1e-22	-51.14	0	7566	0.4446	11817.4	0.4075
M09242_2.00:IRF1:IRF2	RAAANTGAAASTGAAASTRA	1e-22	-50.88	0	100	0.0059	53.2	0.0018
M00231_2.00:EGR1:EGR2:EGR3	CCCMCGCA	1e-21	-50.59	0	2697	0.1585	3842.5	0.1325
M05894_2.00:SOX1:SOX10:SOX11:SOX12:SOX13:SOX14:SOX15:SOX17:SOX18:SOX2:SOX21:SOX3:SOX30:SOX4:SOX5:SOX6:SOX7:SOX8:SOX9:SRY	WAACAATRGN	1e-21	-50.54	0	5385	0.3164	8190.4	0.2825
M10020_2.00:CEBPD	TTKNGCAATV	1e-21	-50.45	0	7087	0.4164	11020.3	0.38
M09076_2.00:EHF:ELF1:ELF2:ELF3:ELF4:ELF5:ETV6:ETV7:SPI1:SPIC	GGAAGRAGGAAGARGRR	1e-21	-50.42	0	512	0.0301	552.4	0.019
M08083_2.00:PRDM1	TCACTTTCAC	1e-21	-50.18	0	1706	0.1002	2302.6	0.0794
M05539_2.00:IRF4:IRF8	HCGAAACCGAAACYR	1e-21	-50.1	0	60	0.0035	21.2	0.0007
M08302_2.00:EGR1:EGR2:EGR3:EGR4	CGCCCCCGC	1e-21	-49.78	0	1726	0.1014	2335.4	0.0805
M04541_2.00:ZNF282	NTTCCCACAACACG	1e-21	-49.73	0	345	0.0203	334.1	0.0115
M08800_2.00:BACH1:BACH2	SSVTGACTCAGCA	1e-21	-49.62	0	333	0.0196	319.8	0.011
M00158_2.00:EHF:ELF1:ELF2:ELF3:ELF4:ELF5:ETV6:ETV7:FEV	ANSCGGAAGT	1e-21	-49.6	0	4697	0.276	7070.4	0.2438
M05548_2.00:IRF7	HNGAAAGTGAAAGTR	1e-21	-49.44	0	339	0.0199	327.2	0.0113
M05404_2.00:HOXA3:HOXA4:HOXA5:HOXA6:HOXA7:HOXB3:HOXB4:HOXB5:HOXB6:HOXB7:HOXB8:HOXC4:HOXC5:HOXC6:HOXC8:HOXD3:HOXD4:HOXD8:PDX1	BTAATTRC	1e-21	-49.05	0	6687	0.3929	10366.9	0.3575
M03252_2.00:HOXA10:HOXA11:HOXA6:HOXA9:HOXB6:HOXB8:HOXB9:HOXC10:HOXC11:HOXC12:HOXC6:HOXC8:HOXC9:HOXD10:HOXD11:HOXD12:HOXD8:HOXD9	TTTTTAYGAC	1e-21	-49.02	0	1583	0.093	2121.7	0.0732
M09651_2.00:T:TBX19	NTTMRCACNNNVSTGYKAANT	1e-21	-48.92	0	147	0.0086	101.5	0.0035
M04336_2.00:FOS:FOSB:FOSL1:FOSL2	GRTGASTCATM	1e-21	-48.81	0	838	0.0492	1014.9	0.035
M04237_2.00:DBP	BGTTACGTAACV	1e-21	-48.49	0	201	0.0118	161.3	0.0056
M06289_2.00:BARHL1:BARHL2:EMX1:EMX2:HMX1:HMX2:HMX3:HOXA4:HOXB4:HOXC4:HOXD4:LBX2:NKX1-1:NKX1-2:TLX1:TLX2:TLX3:VAX1:VAX2:VENTX	GTTAATTR	1e-21	-48.46	0	7920	0.4654	12444.8	0.4292
M04161_2.00:NEUROD1:NEUROD2:NEUROD4:NEUROD6	RCCATATGYT	1e-20	-48.22	0	1635	0.0961	2205.2	0.076
M03448_2.00:NFKB1:NFKB2	AGGGGAWTCCCCT	1e-20	-48.2	0	45	0.0026	13	0.0004
M04194_2.00:ATOH7	AMCATATGKY	1e-20	-47.99	0	1834	0.1078	2513	0.0867
M07956_2.00:ELF1:ELF2:ELF4:ELK1:ELK3:ELK4:ERF:ERG:ETS1:ETS2:ETV1:ETV2:ETV3:ETV3L:ETV4:ETV5:FEV:FLI1:GABPA	GGVRCCGGAAGTG	1e-20	-47.89	0	170	0.01	127.4	0.0044
M09378_2.00:NFIA:NFIB:NFIC:NFIX	CYTGGCHCCCTGCCARG	1e-20	-47.76	0	269	0.0158	243.6	0.0084
M09379_2.00:NFIA:NFIB:NFIC:NFIX	YTGGCANCNTGCCAA	1e-20	-47.35	0	237	0.0139	205.4	0.0071
M09383_2.00:NFIA:NFIB:NFIC:NFIX	YTGGCANCNTGCCAA	1e-20	-47.35	0	237	0.0139	205.4	0.0071
M09022_2.00:ONECUT1:ONECUT2:ONECUT3	TTTATTGATTK	1e-20	-47.07	0	1040	0.0611	1316.1	0.0454
M09026_2.00:ONECUT1:ONECUT2:ONECUT3	TTTATTGATTK	1e-20	-47.07	0	1040	0.0611	1316.1	0.0454
M04814_2.00:FOXO1:FOXO3:FOXO4:FOXO6:FOXP4	HTCCCCACACS	1e-20	-47.05	0	1618	0.0951	2186.6	0.0754
M03732_2.00:ELF1:ELF2:ELF4:ELK1:ELK3:ELK4:ERF:ERG:ETS1:ETS2:ETV1:ETV2:ETV3:ETV3L:ETV4:ETV5:ETV6:FEV:FLI1:GABPA	DACCGGAAGTG	1e-20	-47.04	0	193	0.0113	154.2	0.0053
M02795_2.00:NEUROD1:NEUROD2:NEUROD4:NEUROD6	RMCATATGGY	1e-20	-47.02	0	1438	0.0845	1912.8	0.066
M09873_2.00:NEUROD1:NEUROD2:NEUROD4:NEUROD6	RCCATATGKY	1e-20	-47.02	0	1438	0.0845	1912.8	0.066
M01974_2.00:FOXC1:FOXC2:FOXD1:FOXD2:FOXD3:FOXD4:FOXD4L1:FOXD4L3:FOXD4L4:FOXD4L5:FOXD4L6:FOXE1:FOXG1:FOXI1:FOXI2:FOXI3:FOXJ3:FOXK2:FOXL1:FOXL2:FOXS1	RTAAACAA	1e-20	-46.83	0	4739	0.2785	7166.9	0.2472
M04047_2.00:TFAP2A:TFAP2B:TFAP2C:TFAP2D:TFAP2E	YSCCTSAGGSR	1e-20	-46.74	0	1533	0.0901	2059	0.071
M05391_2.00:ALX1:ALX3:ALX4:ARX:DRGX:EMX1:EMX2:EN1:EN2:ESX1:GBX1:GBX2:GSX1:GSX2:HOXA2:HOXA3:HOXA4:HOXA5:HOXB2:HOXB3:HOXB4:HOXB5:HOXC4:HOXC5:HOXD3:HOXD4:ISL1:ISL2:ISX:LHX2:LHX3:LHX4:LHX9:MIXL1:MNX1:NKX1-1:NKX1-2:NOTO:OTP:PDX1:PHOX2A:PHOX2B:PROP1:PRRX1:PRRX2:RAX:RAX2:SEBOX:SHOX:SHOX2:UNCX:VAX1:VAX2:VSX1:VSX2	CTAATTRV	1e-20	-46.56	0	9318	0.5475	14842.5	0.5119
M11291_2.00:NFIA:NFIB:NFIC:NFIX	TTGGCANNDHKCCAA	1e-20	-46.43	0	234	0.0138	203.1	0.007
M04292_2.00:ATF3:JDP2	NRTGACRTCAYN	1e-20	-46.32	0	1039	0.0611	1318.4	0.0455
M01718_2.00:TWIST1:TWIST2	MACATATGGN	1e-20	-46.32	0	2849	0.1674	4116.6	0.142
M10110_2.00:PRDM1	SRGGAAGTGAAAGTRA	1e-20	-46.11	0	264	0.0155	240.6	0.0083
M04730_2.00:ELF1:ELF2:ELF4:ELK1:ELK3:ELK4:ERF:ERG:ETS1:ETS2:ETV1:ETV2:ETV3:ETV3L:ETV4:ETV5:FEV:FLI1:GABPA	NACCGGAAGTR	1e-19	-45.98	0	254	0.0149	228.8	0.0079
M09671_2.00:HOXA10:HOXA5:HOXA6:HOXA7:HOXA9:HOXB4:HOXB5:HOXB6:HOXB7:HOXB8:HOXB9:HOXC10:HOXC5:HOXC6:HOXC8:HOXC9:HOXD10:HOXD8:HOXD9	TTAATTAC	1e-19	-45.73	0	6175	0.3629	9549.7	0.3293
M10478_2.00:ELF1:ELF2:ELF4:ELK1:ELK3:ELK4:ERF:ERG:ETS1:ETS2:ETV1:ETV2:ETV3:ETV3L:ETV4:ETV5:FEV:FLI1:GABPA	AAHAACAGGAAGTG	1e-19	-44.96	0	487	0.0286	535	0.0184
M05292_2.00:ALX1:ALX3:ALX4:ARX:BARHL1:BARHL2:BARX1:BARX2:BSX:DLX1:DLX2:DLX3:DLX4:DLX5:DLX6:DRGX:EMX1:EMX2:EN1:EN2:ESX1:EVX1:EVX2:GBX1:GBX2:GSX1:GSX2:HESX1:HOXA1:HOXA2:HOXA3:HOXA4:HOXA5:HOXB1:HOXB2:HOXB3:HOXB4:HOXB5:HOXC4:HOXC5:HOXD1:HOXD3:HOXD4:ISX:LHX1:LHX3:LHX4:LHX5:MEOX1:MEOX2:MIXL1:MNX1:MSX1:MSX2:NANOG:NANOGP8:NKX1-1:NKX1-2:NOTO:OTP:PDX1:PHOX2A:PHOX2B:PROP1:PRRX1:PRRX2:RAX:RAX2:SEBOX:SHOX:SHO…	STAATTAS	1e-19	-44.96	0	6818	0.4006	10631.4	0.3666
M10353_2.00:PLAGL2	TGGGGAACCCCA	1e-19	-44.89	0	38	0.0022	9.9	0.0003
M03335_2.00:IRF4:IRF8	HCGAAACCGAAACT	1e-19	-44.81	0	62	0.0036	25.8	0.0009
M09804_2.00:TFAP4	RMCAGCTGC	1e-19	-44.77	0	4653	0.2734	7046.5	0.243
M09419_2.00:STAT3	CAYTTCCMGGAA	1e-19	-44.73	0	1211	0.0712	1582.1	0.0546
M05183_2.00:CRX:DLX1:DLX2:DLX4:DLX5:EMX1:LHX2:LHX9:PITX1:PITX2:VAX1:VSX1	STAATTRV	1e-19	-44.45	0	9161	0.5383	14599.9	0.5035
M07845_2.00:PRDM1	TCACTTTCACTTTYH	1e-19	-44.32	0	249	0.0146	225.1	0.0078
M04744_2.00:EHF:ELF1:ELF2:ELF3:ELF4:ELF5:ELK1:ELK3:ELK4:ERF:ERG:ETS1:ETS2:ETV1:ETV2:ETV3:ETV3L:ETV4:ETV5:ETV6:ETV7:FEV:FLI1:GABPA:SPDEF	WAMCCGGAAGTR	1e-19	-44.21	0	356	0.0209	361.8	0.0125
M05311_2.00:HOXA10:HOXA4:HOXA5:HOXA6:HOXA7:HOXA9:HOXB4:HOXB5:HOXB6:HOXB7:HOXB8:HOXB9:HOXC10:HOXC4:HOXC5:HOXC6:HOXC8:HOXC9:HOXD10:HOXD4:HOXD8:HOXD9:MNX1:PDX1	BTAATKGC	1e-19	-43.86	0	9100	0.5347	14503	0.5001
M01741_2.00:MITF:TFE3:TFEB:TFEC	NCACGTGAYN	1e-19	-43.77	0	2697	0.1585	3895.9	0.1344
M07589_2.00:ZNF189	CYKCYSTTCCMB	1e-18	-43.51	0	2891	0.1699	4206.9	0.1451
M08882_2.00:EGR1:EGR2:EGR3:EGR4	CYYCCGCCCMCGCHCHC	1e-18	-43.24	0	534	0.0314	604.4	0.0208
M02183_2.00:CDX1:CDX2:CDX4	GTAATWAA	1e-18	-43.22	0	3019	0.1774	4413.9	0.1522
M06373_2.00:BARHL1:BARHL2:HOXA6:HOXB6:HOXB8:HOXC6:HOXC8:HOXD8:NKX1-1:NKX1-2	TTTAATTG	1e-18	-42.99	0	8322	0.489	13189.4	0.4548
M02773_2.00:MITF:TFE3	AYCACGTGAC	1e-18	-42.87	0	1013	0.0595	1296.4	0.0447
M09059_2.00:ELF1:ELF2:ELF4:ELK1:ELK3:ELK4:ERF:ERG:ETS1:ETS2:ETV1:ETV2:ETV3:ETV3L:ETV4:ETV5:FEV:FLI1:GABPA	GRCCGGAAGTGG	1e-18	-42.86	0	202	0.0119	171.2	0.0059
M05442_2.00:PAX3:PAX7	HTAATCAATTAN	1e-18	-42.78	0	300	0.0176	292.5	0.0101
M05987_2.00:BHLHE22:BHLHE23	ACATCTGTC	1e-18	-42.63	0	1843	0.1083	2561.4	0.0883
M09760_2.00:TFAP2A:TFAP2B:TFAP2C:TFAP2D:TFAP2E	HNTGCCCTGRGGCC	1e-18	-42.23	0	551	0.0324	631.8	0.0218
M05228_2.00:HESX1:NOBOX	DTAATTRG	1e-18	-42.1	0	6125	0.3599	9508	0.3279
M02748_2.00:NFATC1:NFATC2:NFATC3:NFATC4	GGAAHTTTCC	1e-18	-41.53	0	1020	0.0599	1313.5	0.0453
M08168_2.00:SOX1:SOX10:SOX11:SOX12:SOX13:SOX14:SOX15:SOX17:SOX18:SOX2:SOX21:SOX3:SOX30:SOX4:SOX5:SOX6:SOX7:SOX8:SOX9:SRY	CCTTTGTTTT	1e-18	-41.49	0	3095	0.1819	4550.2	0.1569
M02935_2.00:ZNF740	VCCCCCCCAC	1e-17	-41.34	0	1731	0.1017	2396	0.0826
M10562_2.00:FOXO4	ATAAACAANYH	1e-17	-41.21	0	5533	0.3251	8534.9	0.2943
M10621_2.00:GTF2I	VAGGAAGTGA	1e-17	-41.19	0	5156	0.303	7911.9	0.2728
M08290_2.00:MAZ	CCCCCTCCC	1e-17	-41.17	0	2199	0.1292	3128.3	0.1079
M03205_2.00:ALX1:ALX3:ALX4:ARX:BARX1:BARX2:BSX:DLX1:DLX2:DLX3:DLX4:DLX5:DLX6:DRGX:EMX1:EMX2:EN1:EN2:ESX1:EVX1:EVX2:GBX1:GBX2:GSX1:GSX2:HMX1:HMX3:HOXA1:HOXA2:HOXA3:HOXA4:HOXA5:HOXB1:HOXB2:HOXB3:HOXB4:HOXB5:HOXC4:HOXC5:HOXD1:HOXD3:HOXD4:ISX:LHX3:LHX4:MEOX1:MIXL1:MNX1:MSX1:MSX2:NKX1-1:NKX1-2:NOTO:OTP:PDX1:PHOX2A:PHOX2B:PROP1:PRRX1:PRRX2:RAX:RAX2:SEBOX:SHOX:SHOX2:UNCX:VAX1:VAX2:VENTX:VSX1:VSX2	NYTAATTAGD	1e-17	-41.1	0	5756	0.3382	8905.5	0.3071
M02461_2.00:GMEB1:GMEB2	BBACGYANN	1e-17	-41.04	0	6497	0.3818	10140.6	0.3497
M06225_2.00:CDX1:CDX2:CDX4:HOXA13:HOXC13	DTTWATTA	1e-17	-40.92	0	9833	0.5778	15793.9	0.5447
M08142_2.00:IRF1:IRF2	AAAVWGAAAGTGAAAGTAAAN	1e-17	-40.85	0	88	0.0052	50.1	0.0017
M05547_2.00:IRF7	HCGAAAVCGAAAVTA	1e-17	-40.78	0	170	0.01	137.3	0.0047
M00427_2.00:CDX1:CDX2:CDX4	TTWATKRYN	1e-17	-40.75	0	11235	0.6602	18216.8	0.6282
M04160_2.00:NEUROD1:NEUROD2:NEUROD4:NEUROD6	RACATATGGY	1e-17	-40.47	0	1331	0.0782	1787.1	0.0616
M10099_2.00:ZNF263	GRGGGAGGAGGR	1e-17	-40.3	0	1213	0.0713	1609.8	0.0555
M04740_2.00:EHF:ELF1:ELF2:ELF3:ELF4:ELF5:ELK1:ELK3:ELK4:ERF:ERG:ETS1:ETS2:ETV1:ETV2:ETV3:ETV3L:ETV4:ETV5:ETV6:ETV7:FEV:FLI1:GABPA:SPDEF	WACCCGGAAGTR	1e-17	-40.21	0	297	0.0175	294.7	0.0102
M04677_2.00:ONECUT1:ONECUT2:ONECUT3	NYATCGATYN	1e-17	-40.14	0	1857	0.1091	2600.8	0.0897
M04437_2.00:EGR1:EGR2:EGR3:EGR4	CMCGCCCACGCVC	1e-17	-39.93	0	718	0.0422	877.1	0.0302
M01484_2.00:EHF:ELF1:ELF2:ELF3:ELF4:ELF5:ETV6:ETV7:FEV	ANSCGGAAGT	1e-17	-39.9	0	4833	0.284	7393.6	0.255
M00171_2.00:HMBOX1:HNF1A:HNF1B	TTAACYNV	1e-17	-39.86	0	12287	0.722	20063.2	0.6919
M01913_2.00:DNMT1	NNBNGCGGNN	1e-17	-39.79	0	6937	0.4076	10892.3	0.3756
M03867_2.00:ALX1:ALX3:ALX4:ARX:BARX1:BARX2:BSX:DLX2:DLX3:DRGX:EMX1:EMX2:EN1:EN2:ESX1:EVX1:EVX2:GBX1:GBX2:GSX1:GSX2:HESX1:HOXA2:HOXA3:HOXB2:HOXB3:HOXD3:ISX:LBX1:LBX2:LHX1:LHX2:LHX3:LHX4:LHX5:LHX6:LHX8:LHX9:LMX1A:LMX1B:MEOX1:MIXL1:MNX1:MSX1:MSX2:NKX1-1:NKX1-2:NOBOX:NOTO:OTP:PDX1:PHOX2A:PHOX2B:PROP1:PRRX1:PRRX2:RAX:RAX2:SEBOX:SHOX:SHOX2:UNCX:VAX1:VAX2:VSX1:VSX2:ZFHX2	TAATYTAATTA	1e-17	-39.56	0	445	0.0261	493.1	0.017
M05538_2.00:IRF5	VCGAAACCGAAACT	1e-17	-39.54	0	91	0.0053	54.8	0.0019
M08884_2.00:EGR1:EGR2:EGR3:EGR4	CCCCDCCCMCWCCCCCYC	1e-17	-39.49	0	530	0.0311	611.8	0.0211
M03646_2.00:HLF	GTTACGTAAC	1e-17	-39.42	0	234	0.0138	216.9	0.0075
M05868_2.00:GCM1:GCM2	ATGCGGGTR	1e-17	-39.39	0	994	0.0584	1285.1	0.0443
M04397_2.00:PRDM1	YCACTTTCACTY	1e-17	-39.31	0	750	0.0441	926.1	0.0319
M02797_2.00:NHLH1:NHLH2	MGCAGCTGCG	1e-17	-39.3	0	599	0.0352	709.1	0.0245
M05860_2.00:EGR1:EGR2:EGR3:EGR4	NNCCGCCCACGCA	1e-17	-39.21	0	392	0.023	422.8	0.0146
M03810_2.00:ARX:BARHL1:BARHL2:BARX1:BARX2:BSX:DLX1:DLX2:DLX3:DLX4:DLX5:DLX6:DRGX:EMX1:EMX2:ESX1:EVX1:EVX2:GBX1:GBX2:HMX1:HMX2:HMX3:HOXA2:HOXB2:LBX1:LBX2:MEOX1:MEOX2:MNX1:MSX1:MSX2:NANOG:NANOGP8:NKX1-1:NKX1-2:PDX1:RAX:RAX2:TLX1:TLX2:TLX3:UNCX:VAX1:VAX2:VSX1:VSX2	SCTAAACGGT	1e-17	-39.18	0	1584	0.0931	2183.7	0.0753
M00474_2.00:HOXA10:HOXA11:HOXA9:HOXB9:HOXC10:HOXC11:HOXC12:HOXC9:HOXD10:HOXD11:HOXD12:HOXD9	TTTAYKRBN	1e-16	-39.08	0	11329	0.6657	18400.8	0.6346
M04678_2.00:ONECUT1:ONECUT2:ONECUT3	NTATTGATTN	1e-16	-39.05	0	1681	0.0988	2334.6	0.0805
M01917_2.00:TET1	GGGGGGGA	1e-16	-39.01	0	2177	0.1279	3110	0.1073
M03336_2.00:IRF4:IRF8	HCGAAACCGAAACT	1e-16	-38.94	0	25	0.0015	4.4	0.0002
M02967_2.00:ELF1:ELF2:ELF4:ELK1:ELK3:ELK4:ERF:ERG:ETS1:ETS2:ETV1:ETV2:ETV3:ETV3L:ETV4:ETV5:FEV:FLI1:GABPA	AACCGGAAATA	1e-16	-38.92	0	203	0.0119	179.5	0.0062
M06185_2.00:ELF1:ELF2:ELF4:ELK1:ELK3:ELK4:ERF:ERG:ETS1:ETS2:ETV1:ETV2:ETV3:ETV3L:ETV4:ETV5:ETV6:ETV7:FEV:FLI1:GABPA	ACCGGAAGT	1e-16	-38.86	0	272	0.016	265.2	0.0091
M10684_2.00:SIX1:SIX2:SIX4:SIX5	CTCAGRTTTCH	1e-16	-38.86	0	1760	0.1034	2458	0.0848
M08189_2.00:NFE2:NFE2L1:NFE2L2:NFE2L3	TGACTCGGCA	1e-16	-38.8	0	669	0.0393	811.3	0.028
M09491_2.00:MAF:MAFA:MAFB:MAFG:MAFK	TGCTGASTCAGC	1e-16	-38.72	0	206	0.0121	184	0.0063
M05143_2.00:ALX1:ALX3:ALX4:ARX:BARHL1:BARHL2:BARX1:BARX2:BSX:DRGX:EMX1:EMX2:EN1:EN2:ESX1:EVX1:EVX2:GBX1:GBX2:GSX1:GSX2:HESX1:HOXA2:HOXA3:HOXB2:HOXB3:HOXD3:ISX:LBX1:LBX2:LHX1:LHX2:LHX3:LHX4:LHX5:LHX6:LHX8:LHX9:LMX1A:LMX1B:MEOX1:MEOX2:MIXL1:MNX1:MSX1:MSX2:NKX1-1:NKX1-2:NOBOX:NOTO:OTP:PDX1:PHOX2A:PHOX2B:PROP1:PRRX1:PRRX2:RAX:RAX2:SEBOX:SHOX:SHOX2:UNCX:VAX1:VAX2:VSX1:VSX2:ZFHX2	NTAAYGAV	1e-16	-38.7	0	9329	0.5482	14958.7	0.5159
M00131_2.00:ZSCAN26	ATTAGTAC	1e-16	-38.6	0	4145	0.2436	6279.5	0.2166
M01272_2.00:ZZZ3	TGAATCCATYN	1e-16	-38.4	0	1747	0.1027	2441.1	0.0842
M04440_2.00:EGR1:EGR2:EGR3:EGR4	HMCGCCCACGCAH	1e-16	-38.38	0	183	0.0108	156.7	0.0054
M02868_2.00:DBP	BATTACGTAAYM	1e-16	-38.37	0	221	0.013	202.6	0.007
M05447_2.00:POU2F2	ATGCATATGCAW	1e-16	-38.27	0	762	0.0448	948.3	0.0327
M09151_2.00:NKX6-1:NKX6-2:NKX6-3	GATTAATGRSHWWTTAATK	1e-16	-37.94	0	139	0.0082	107	0.0037
M09390_2.00:SOX1:SOX10:SOX11:SOX12:SOX13:SOX14:SOX15:SOX17:SOX18:SOX2:SOX21:SOX3:SOX30:SOX4:SOX5:SOX6:SOX7:SOX8:SOX9:SRY	WAACAATR	1e-16	-37.64	0	4463	0.2623	6810.7	0.2349
M09404_2.00:SOX1:SOX10:SOX11:SOX12:SOX13:SOX14:SOX15:SOX17:SOX18:SOX2:SOX21:SOX3:SOX30:SOX4:SOX5:SOX6:SOX7:SOX8:SOX9:SRY	WAACAATR	1e-16	-37.64	0	4463	0.2623	6810.7	0.2349
M10507_2.00:ELF1:ELF2:ELF4:ELK1:ELK3:ELK4:ERF:ERG:ETS1:ETS2:ETV1:ETV2:ETV3:ETV3L:ETV4:ETV5:FEV:FLI1:GABPA	RCCGGAAGTGCA	1e-16	-37.57	0	227	0.0133	211.8	0.0073
M05890_2.00:LEF1:TCF7:TCF7L1:TCF7L2	NWASATCAAAGRV	1e-16	-37.54	0	997	0.0586	1299.9	0.0448
M08814_2.00:FOS:FOSB:FOSL1:FOSL2	VTGACTCAB	1e-16	-37.46	0	3072	0.1805	4550.6	0.1569
M08268_2.00:ZNF273	BTCAGCAGCTGCTVYTK	1e-16	-37.41	0	271	0.0159	267.1	0.0092
M05134_2.00:CRX:DMBX1:DPRX:GSC:GSC2:OTX1:OTX2:PITX1:PITX2:PITX3:TPRX1	HTAATCCS	1e-16	-37.38	0	5059	0.2973	7794.6	0.2688
M09799_2.00:SREBF1:SREBF2	CSVVTCACCCCASGN	1e-16	-37.19	0	961	0.0565	1247.1	0.043
M11094_2.00:ESR1:ESR2:NR1D1:NR1D2:NR1H2:NR1H3:NR1H4:NR2C1:NR2C2:NR2F1:NR2F2:NR2F6:NR4A1:NR5A2:NR6A1:PPARA:PPARD:PPARG:RARA:RARB:RARG:RORA:RORB:RORC:RXRA:RXRB:RXRG	BTGACCY	1e-16	-37.02	0	9817	0.5769	15816.9	0.5455
M04947_2.00:RHOXF1	YTGATCCC	1e-16	-36.92	0	8050	0.473	12805.7	0.4416
M07683_2.00:ZNF75A:ZNF75D	GTGGGAAAGCCT	1e-16	-36.85	0	169	0.0099	142.2	0.0049
M09815_2.00:USF2	CACGTG	1e-16	-36.85	0	11338	0.6662	18444.2	0.6361
M05408_2.00:HOXA3:HOXA4:HOXA5:HOXA6:HOXA7:HOXB3:HOXB4:HOXB5:HOXB6:HOXB7:HOXB8:HOXC4:HOXC5:HOXC6:HOXC8:HOXD3:HOXD4:HOXD8:PDX1	VHTAATTACS	1e-15	-36.79	0	3078	0.1809	4566.7	0.1575
M10513_2.00:ELF1:ELF2:ELF4:ELK1:ELK3:ELK4:ERF:ERG:ETS1:ETS2:ETV1:ETV2:ETV3:ETV3L:ETV4:ETV5:FEV:FLI1:GABPA	VACCGGAAGTV	1e-15	-36.79	0	134	0.0079	102	0.0035
M04238_2.00:DBP	BRTTACRTAACV	1e-15	-36.71	0	232	0.0136	219.1	0.0076
M09676_2.00:ALX1:ALX3:ALX4:ARX:BARHL1:BARHL2:BARX1:BARX2:BSX:DRGX:EMX1:EMX2:EN1:EN2:ESX1:EVX1:EVX2:GBX1:GBX2:GSX1:GSX2:HESX1:HMX1:HMX2:HMX3:HOXA1:HOXA2:HOXA3:HOXA4:HOXA5:HOXB1:HOXB2:HOXB3:HOXB4:HOXB5:HOXC4:HOXC5:HOXD3:HOXD4:LHX2:LHX3:LHX4:LHX9:MEOX1:MEOX2:MIXL1:MNX1:MSX1:MSX2:NKX1-1:NKX1-2:NOTO:OTP:PDX1:PHOX2A:PHOX2B:PROP1:PRRX1:PRRX2:RAX:RAX2:SEBOX:SHOX:SHOX2:TLX1:TLX2:TLX3:UNCX:VAX1:VAX2:VENTX:…	TTWATGA	1e-15	-36.66	0	7941	0.4666	12624.5	0.4354
M02897_2.00:ZNF75A:ZNF75D	TGTGGGAAAAGC	1e-15	-36.63	0	202	0.0119	182.3	0.0063
M05543_2.00:IRF4:IRF8	HCGAAACCGAAACTA	1e-15	-36.62	0	37	0.0022	11.7	0.0004
M05535_2.00:IRF5	CCGAAACCGAAACY	1e-15	-36.37	0	56	0.0033	25.1	0.0009
M00558_2.00:HOXA10:HOXA5:HOXA6:HOXA7:HOXA9:HOXB4:HOXB5:HOXB6:HOXB7:HOXB8:HOXB9:HOXC10:HOXC5:HOXC6:HOXC8:HOXC9:HOXD10:HOXD8:HOXD9	TTAATKRSN	1e-15	-36.02	0	10980	0.6452	17834.9	0.615
M06369_2.00:ALX1:ALX3:ALX4:ARX:DRGX:EN1:EN2:ESX1:HESX1:ISX:LHX2:LHX3:LHX4:LHX6:LHX8:LHX9:LMX1A:LMX1B:MIXL1:NOBOX:OTP:PHOX2A:PHOX2B:PROP1:PRRX1:PRRX2:RAX:RAX2:SEBOX:SHOX:SHOX2:UNCX:VSX1:VSX2:ZFHX2	NTTAATTA	1e-15	-35.74	0	8494	0.4991	13574.9	0.4681
M01001_2.00:JUN:JUNB:JUND	ATGACKCAH	1e-15	-35.59	0	2733	0.1606	4023.7	0.1388
M05439_2.00:PAX3:PAX7	NTAATCRATTAN	1e-15	-35.55	0	318	0.0187	333.8	0.0115
M08203_2.00:GATA1:GATA2:GATA3:GATA4:GATA5:GATA6	AGATRDTATC	1e-15	-35.5	0	1321	0.0776	1802.4	0.0622
M00120_2.00:MYF5:MYF6:MYOG	NCANCTGTY	1e-15	-35.43	0	11825	0.6949	19310.2	0.6659
M09505_2.00:MAZ	CCCCCCCC	1e-15	-35.4	0	3266	0.1919	4884	0.1684
M10469_2.00:EBF1:EBF2:EBF3:EBF4	VDCDABTCCCYAGGGARBDKGB	1e-15	-35.27	0	33	0.0019	9.4	0.0003
M05529_2.00:IRF5:IRF6	ACCGAAACT	1e-15	-34.92	0	173	0.0102	150.7	0.0052
M03010_2.00:ELF1:ELF2:ELF4:ELK1:ELK3:ELK4:ERF:ERG:ETS1:ETS2:ETV1:ETV2:ETV3:ETV3L:ETV4:ETV5:FEV:FLI1:GABPA	ACCGGAAGTD	1e-15	-34.85	0	150	0.0088	123.8	0.0043
M04193_2.00:ATOH7	AMCATATGKY	1e-15	-34.8	0	1909	0.1122	2721.4	0.0938
M06073_2.00:EGR1:EGR2:EGR3:EGR4	NHMCGCCCACGCMM	1e-15	-34.8	0	879	0.0517	1137.2	0.0392
M02980_2.00:ELF1:ELF2:ELF4:ELK1:ELK3:ELK4:ERF:ERG:ETS1:ETS2:ETV1:ETV2:ETV3:ETV3L:ETV4:ETV5:FEV:FLI1:GABPA	ACCGGAAGTD	1e-15	-34.74	0	155	0.0091	129.9	0.0045
M03117_2.00:CRX:DMBX1:DPRX:GSC:GSC2:OTX1:OTX2:PITX1:PITX2:PITX3:TPRX1	YTAATCCG	1e-14	-34.49	0	4890	0.2873	7549.2	0.2603
M04758_2.00:EHF:ELF1:ELF2:ELF3:ELF4:ELF5:ETV6:ETV7:SPI1:SPIC	GACCCGGAAGTD	1e-14	-34.2	0	307	0.018	322.5	0.0111
M04733_2.00:ELF1:ELF2:ELF4:ELK1:ELK3:ELK4:ERF:ERG:ETS1:ETS2:ETV1:ETV2:ETV3:ETV3L:ETV4:ETV5:FEV:FLI1:GABPA	ACCGGAAGTR	1e-14	-34.12	0	171	0.01	149.1	0.0051
M05283_2.00:IRX1:IRX3:IRX6	DACATGHNDWNNCATGTW	1e-14	-34.08	0	814	0.0478	1044.9	0.036
M00175_2.00:IRF4:IRF8	NWNCGAAACY	1e-14	-34.07	0	6354	0.3734	9988.9	0.3445
M03084_2.00:CRX:DMBX1:DPRX:GSC:GSC2:OTX1:OTX2:PITX1:PITX2:PITX3:TPRX1	TTAATCCC	1e-14	-33.7	0	5309	0.312	8252.7	0.2846
M09547_2.00:FOXO1:FOXO3:FOXO4:FOXO6	GTAAACAG	1e-14	-33.53	0	3577	0.2102	5407.8	0.1865
M04171_2.00:OLIG2:OLIG3	AACATATGGT	1e-14	-33.51	0	777	0.0457	992.5	0.0342
M11370_2.00:STAT3	TTCYGGGAAN	1e-14	-33.44	0	2627	0.1544	3873.5	0.1336
M05049_2.00:HOXA10:HOXA4:HOXA5:HOXA6:HOXA7:HOXA9:HOXB4:HOXB5:HOXB6:HOXB7:HOXB8:HOXB9:HOXC10:HOXC4:HOXC5:HOXC6:HOXC8:HOXC9:HOXD10:HOXD4:HOXD8:HOXD9:MNX1:PDX1	BTAATKGC	1e-14	-33.29	0	9271	0.5448	14932.1	0.5149
M10108_2.00:PRDM1	RGRAAGTGAAAG	1e-14	-33.28	0	1679	0.0987	2372.1	0.0818
M09392_2.00:LEF1:TCF7:TCF7L1:TCF7L2	BCCTTTSWWNTBYH	1e-14	-33.22	0	3227	0.1896	4843	0.167
M09402_2.00:LEF1:TCF7:TCF7L1:TCF7L2	BCCTTTSWWNTBYH	1e-14	-33.22	0	3227	0.1896	4843	0.167
M01971_2.00:ELF1:ELF2:ELF4:ELK1:ELK3:ELK4:ERF:ERG:ETS1:ETS2:ETV1:ETV2:ETV3:ETV3L:ETV4:ETV5:FEV:FLI1:GABPA	CCGGAAGT	1e-14	-33.14	0	283	0.0166	293.6	0.0101
M09758_2.00:TFAP2A:TFAP2B:TFAP2C:TFAP2D:TFAP2E	SGCCSCRGGCN	1e-14	-33.08	0	1861	0.1094	2660	0.0917
M04747_2.00:EHF:ELF1:ELF2:ELF3:ELF4:ELF5:ELK1:ELK3:ELK4:ERF:ERG:ETS1:ETS2:ETV1:ETV2:ETV3:ETV3L:ETV4:ETV5:ETV6:ETV7:FEV:FLI1:GABPA:SPDEF	AATGCGGAAGTG	1e-14	-33.04	0	202	0.0119	189.1	0.0065
M08816_2.00:NFE2:NFE2L1:NFE2L2:NFE2L3	ATGACTCAGCARWW	1e-14	-33.03	0	358	0.021	394.9	0.0136
M11244_2.00:RELA	YGRGAAAAHCM	1e-14	-33.03	0	2365	0.139	3458.7	0.1193
M06190_2.00:ELF1:ELF2:ELF4:ELK1:ELK3:ELK4:ERF:ERG:ETS1:ETS2:ETV1:ETV2:ETV3:ETV3L:ETV4:ETV5:FEV:FLI1:GABPA	CCGGAAAT	1e-14	-33.01	0	398	0.0234	449.5	0.0155
M02687_2.00:ALX1:ALX3:ALX4:ARX:DRGX:EMX1:EMX2:EN1:EN2:ESX1:GBX1:GBX2:GSX1:GSX2:HESX1:HOXA2:HOXA3:HOXB2:HOXB3:HOXD3:ISX:LHX1:LHX2:LHX3:LHX4:LHX5:LHX6:LHX8:LHX9:LMX1A:LMX1B:MIXL1:MNX1:MSX1:MSX2:NOBOX:NOTO:OTP:PDX1:PHOX2A:PHOX2B:PROP1:PRRX1:PRRX2:RAX:RAX2:SEBOX:SHOX:SHOX2:UNCX:VAX1:VAX2:VSX1:VSX2:ZFHX2	GRWTAATTAATTW	1e-14	-32.9	0	397	0.0233	448.9	0.0155
M04196_2.00:BHLHA15	RCCATATGGY	1e-14	-32.84	0	1541	0.0906	2160.6	0.0745
M09348_2.00:NFKB1:NFKB2	MTTTCCCT	1e-14	-32.76	0	8167	0.4799	13060.3	0.4504
M09801_2.00:SREBF1:SREBF2	CACCCCA	1e-14	-32.4	0	4122	0.2422	6310.8	0.2176
M03716_2.00:ONECUT1:ONECUT2:ONECUT3	WNCGATCGATAAHN	1e-13	-32.23	0	549	0.0323	665.5	0.023
M03083_2.00:CRX:DMBX1:DPRX:GSC:GSC2:OTX1:OTX2:PITX1:PITX2:PITX3:TPRX1	NTTAATCCH	1e-13	-32.09	0	5196	0.3053	8085.3	0.2788
M01972_2.00:ELF1:ELF2:ELF4:ELK1:ELK3:ELK4:ERF:ERG:ETS1:ETS2:ETV1:ETV2:ETV3:ETV3L:ETV4:ETV5:ETV6:FEV:FLI1:GABPA	CCGGAAGT	1e-13	-31.98	0	301	0.0177	320.1	0.011
M04503_2.00:ZNF75A:ZNF75D	MGCTTTTCCCACAM	1e-13	-31.95	0	162	0.0095	142.3	0.0049
M10197_2.00:EGR1:EGR2:EGR3:EGR4	DTGCGTGGGCGK	1e-13	-31.87	0	49	0.0029	22.5	0.0008
M02764_2.00:TFAP2A:TFAP2B:TFAP2C:TFAP2D:TFAP2E	TGCCCYBVGGGCA	1e-13	-31.78	0	538	0.0316	651.5	0.0225
M10106_2.00:IKZF1:IKZF2:IKZF3:IKZF4	WWWAGGAAAAM	1e-13	-31.69	0	3341	0.1963	5043.6	0.1739
M10851_2.00:POU5F1	TKWWATGCAAATK	1e-13	-31.22	0	1552	0.0912	2189.4	0.0755
M10473_2.00:ELF5:SPI1:SPIB:SPIC	AGAGGAAG	1e-13	-31.21	0	5817	0.3418	9129.2	0.3148
M05775_2.00:LEF1:TCF7:TCF7L1:TCF7L2	ASATCAAAG	1e-13	-31.15	0	1296	0.0762	1792.9	0.0618
M00259_2.00:FOXC1:FOXC2:FOXD1:FOXD2:FOXD3:FOXD4:FOXD4L1:FOXD4L3:FOXD4L4:FOXD4L5:FOXD4L6:FOXE1:FOXF1:FOXF2:FOXG1:FOXI1:FOXI3:FOXK2:FOXL1:FOXL2:FOXP4:FOXS1	ATAAACAA	1e-13	-30.85	0	6683	0.3927	10583.3	0.365
M04046_2.00:TFAP2A:TFAP2B:TFAP2C:TFAP2D:TFAP2E	YGCCBNVGGCR	1e-13	-30.7	0	2244	0.1319	3286.3	0.1133
M09182_2.00:CRX:DMBX1:DPRX:GSC:GSC2:OTX1:OTX2:PITX1:PITX2:PITX3:TPRX1	SYTAATCCCT	1e-13	-30.42	0	2848	0.1674	4258.7	0.1469
M00995_2.00:JUN:JUNB:JUND	ATGACKCAW	1e-13	-30.34	0	3162	0.1858	4767.6	0.1644
M07813_2.00:NFE2:NFE2L1:NFE2L2:NFE2L3	VATGACTCAGCADWTTY	1e-13	-30.33	0	80	0.0047	52.2	0.0018
M03588_2.00:TFAP2A:TFAP2B:TFAP2E	TGCCCBVGGGCA	1e-13	-30.25	0	617	0.0363	772.9	0.0267
M10494_2.00:ELF1:ELF2:ELF4:ELK1:ELK3:ELK4:ERF:ERG:ETS1:ETS2:ETV1:ETV2:ETV3:ETV3L:ETV4:ETV5:FEV:FLI1:GABPA	VNACMGGAWRTTN	1e-13	-30.22	0	3123	0.1835	4705.2	0.1623
M10505_2.00:ELF1:ELF2:ELF4:ELK1:ELK3:ELK4:ERF:ERG:ETS1:ETS2:ETV1:ETV2:ETV3:ETV3L:ETV4:ETV5:FEV:FLI1:GABPA	AACCGGAAG	1e-13	-30.21	0	318	0.0187	349	0.012
M10203_2.00:RREB1	CCCCAAACCACCCC	1e-13	-30.18	0	353	0.0207	396.7	0.0137
M07949_2.00:EHF:ELF1:ELF2:ELF3:ELF4:ELF5:ELK1:ELK3:ELK4:ERF:ERG:ETS1:ETS2:ETV1:ETV2:ETV3:ETV3L:ETV4:ETV5:ETV6:ETV7:FEV:FLI1:GABPA:SPDEF	ACCCGGAAGTG	1e-13	-30.07	0	201	0.0118	194.2	0.0067
M09183_2.00:CRX:DMBX1:DPRX:GSC:GSC2:OTX1:OTX2:PITX1:PITX2:PITX3:TPRX1	TTAATCCYYTTA	1e-12	-29.76	0	1192	0.07	1641.4	0.0566
M09976_2.00:BACH1:BACH2	GCTGAGTCAYGST	1e-12	-29.75	0	183	0.0108	172.5	0.0059
M09945_2.00:NFE2:NFE2L1:NFE2L2:NFE2L3	MTGCTGAGTCATK	1e-12	-29.57	0	404	0.0237	470	0.0162
M09566_2.00:ALX1:ALX3:ALX4:ARX:BARHL1:BARHL2:BARX1:BARX2:BSX:DLX1:DLX2:DLX3:DLX4:DLX5:DLX6:DRGX:EMX1:EMX2:EN1:EN2:ESX1:EVX1:EVX2:GBX1:GBX2:GSX1:GSX2:HESX1:HOXA1:HOXA2:HOXA3:HOXA4:HOXA5:HOXB1:HOXB2:HOXB3:HOXB4:HOXB5:HOXC4:HOXC5:HOXD1:HOXD3:HOXD4:ISX:LHX1:LHX3:LHX4:LHX5:MEOX1:MEOX2:MIXL1:MNX1:MSX1:MSX2:NANOG:NANOGP8:NKX1-1:NKX1-2:NOTO:OTP:PDX1:PHOX2A:PHOX2B:PROP1:PRRX1:PRRX2:RAX:RAX2:SEBOX:SHOX:SHO…	ATGATKGATGRC	1e-12	-29.49	0	750	0.0441	972.6	0.0335
M04462_2.00:EGR1:EGR2:EGR3:EGR4	YCCGCCCACGCAC	1e-12	-29.39	0	128	0.0075	106.9	0.0037
M02796_2.00:NHLH1:NHLH2	CGCAGCTGCG	1e-12	-29.38	0	556	0.0327	688	0.0237
M09016_2.00:SP1:SP3:SP5:SP6:SP8:SP9	CYCCTCCCCCYYCCCCYCCCCCYC	1e-12	-29.29	0	158	0.0093	142.6	0.0049
M01752_2.00:USF2	MMCACGTGAY	1e-12	-29.23	0	622	0.0365	784.8	0.0271
M04333_2.00:FOS:FOSB:FOSL1:FOSL2	SATGAWTCATC	1e-12	-28.95	0	884	0.0519	1176	0.0406
M07550_2.00:CTCF	SYGCCMCCTRSTGGC	1e-12	-28.76	0	144	0.0085	126.5	0.0044
M04943_2.00:CRX:DLX1:DLX2:DLX4:DLX5:EMX1:LHX2:LHX9:PITX1:PITX2:VAX1:VSX1	CTAATTAB	1e-12	-28.71	0	6055	0.3558	9561.4	0.3297
M10291_2.00:WT1	CGCCCCCGCS	1e-12	-28.53	0	949	0.0558	1277.4	0.0441
M04813_2.00:FOXO1:FOXO3:FOXO4:FOXO6:FOXP4	WTCCCCACACR	1e-12	-28.42	0	797	0.0468	1048.4	0.0362
M03605_2.00:TWIST1:TWIST2	AACACATGTT	1e-12	-28.38	0	1680	0.0987	2412	0.0832
M04325_2.00:HLF:TEF	NGTTACGTAACN	1e-12	-28.17	0	249	0.0146	261.1	0.009
M10483_2.00:EHF:ELF1:ELF2:ELF3:ELF4:ELF5:ELK1:ELK3:ELK4:ERF:ERG:ETS1:ETS2:ETV1:ETV2:ETV3:ETV3L:ETV4:ETV5:ETV6:ETV7:FEV:FLI1:GABPA:SPDEF	ACTTCCGGG	1e-12	-28.12	0	325	0.0191	365	0.0126
M01172_2.00:VEZF1	CCCCCCMCWW	1e-12	-28.08	0	1807	0.1062	2615.2	0.0902
M04337_2.00:FOS:FOSB:FOSL1:FOSL2	GATGACGTCATC	1e-12	-28.02	0	216	0.0127	218	0.0075
M04728_2.00:EHF:ELF1:ELF2:ELF3:ELF4:ELF5:ELK1:ELK3:ELK4:ERF:ERG:ETS1:ETS2:ETV1:ETV2:ETV3:ETV3L:ETV4:ETV5:ETV6:ETV7:FEV:FLI1:GABPA:SPDEF	AACCAGGAAGTR	1e-12	-27.94	0	212	0.0125	213.6	0.0074
M03726_2.00:ELF1:ELF2:ELF4:ELK1:ELK3:ELK4:ERF:ERG:ETS1:ETS2:ETV1:ETV2:ETV3:ETV3L:ETV4:ETV5:FEV:FLI1:GABPA	GACCGGAAGTS	1e-12	-27.86	0	113	0.0066	91.2	0.0031
M06476_2.00:HOXA10:HOXA11:HOXA6:HOXA9:HOXB6:HOXB8:HOXB9:HOXC10:HOXC11:HOXC12:HOXC5:HOXC6:HOXC8:HOXC9:HOXD10:HOXD11:HOXD12:HOXD8:HOXD9	TTTATGA	1e-12	-27.85	0	10716	0.6297	17493.4	0.6033
M08706_2.00:TFAP2A:TFAP2B:TFAP2C:TFAP2D:TFAP2E	BGSCCTGRGGCCR	1e-12	-27.71	0	1025	0.0602	1398.9	0.0482
M04667_2.00:ONECUT1:ONECUT2:ONECUT3	NTATCGATYN	1e-12	-27.71	0	1955	0.1149	2853.2	0.0984
M10153_2.00:CTCF	NNNYNGCCACYAGRKGGCRC	1e-11	-27.6	0	94	0.0055	70.3	0.0024
M05137_2.00:CRX:DMBX1:DPRX:GSC:GSC2:OTX1:OTX2:PITX1:PITX2:PITX3:TPRX1	CTAATCCC	1e-11	-27.48	0	5214	0.3064	8176.5	0.282
M07923_2.00:CTCF	CGCCCYCTGGTGGCC	1e-11	-27.35	0	74	0.0043	49.4	0.0017
M07880_2.00:CTCF	GCCCCCTGGTGGCCR	1e-11	-27.34	0	100	0.0059	77.4	0.0027
M05324_2.00:ALX1:ALX3:ALX4:ARX:BARHL1:BARHL2:DRGX:ESX1:GBX1:GBX2:HESX1:HMX1:HMX2:HMX3:ISX:LBX1:LBX2:MEOX1:MEOX2:MIXL1:MSX1:MSX2:PHOX2A:PHOX2B:PROP1:PRRX1:PRRX2:RAX:RAX2:SHOX:SHOX2:TLX2:UNCX:VENTX:VSX1:VSX2	TTAACGAG	1e-11	-27.31	0	2347	0.1379	3484	0.1201
M07625_2.00:ZNF212	TCTCTCTCTCTCTCTCTCTCTCTCTCTCTC	1e-11	-27.29	0	71	0.0042	46.9	0.0016
M09080_2.00:EHF:ELF1:ELF2:ELF3:ELF4:ELF5:ELK1:ELK3:ELK4:ERF:ERG:ETS1:ETS2:ETV1:ETV2:ETV3:ETV3L:ETV4:ETV5:ETV6:ETV7:FEV:FLI1:GABPA:SPDEF	TRNCAGGAAGTRRVT	1e-11	-27.28	0	349	0.0205	400.4	0.0138
M01809_2.00:FOS:FOSB:FOSL1:FOSL2	GATGACGY	1e-11	-27.21	0	2337	0.1373	3468.7	0.1196
M04948_2.00:RHOXF1	YTGATCCC	1e-11	-27.06	0	7567	0.4446	12128.6	0.4183
M02781_2.00:MITF:TFEB	RTCACGTGAC	1e-11	-26.84	0	891	0.0524	1199.4	0.0414
M02762_2.00:TFAP2A:TFAP2B:TFAP2C:TFAP2D:TFAP2E	TGCCYBRGGGCA	1e-11	-26.84	0	675	0.0397	874	0.0301
M03552_2.00:EOMES:TBX2:TBX20:TBX3:TBX4:TBX5	AGGTGTGA	1e-11	-26.83	0	5606	0.3294	8838.8	0.3048
M08772_2.00:MSGN1	RGRMCAAATGGY	1e-11	-26.72	0	686	0.0403	891	0.0307
M09507_2.00:CTCFL	CNNBRGCGCCCCCTGSTGGC	1e-11	-26.7	0	54	0.0032	30.5	0.0011
M09694_2.00:SOX1:SOX10:SOX11:SOX12:SOX13:SOX14:SOX15:SOX17:SOX18:SOX2:SOX21:SOX3:SOX30:SOX4:SOX5:SOX6:SOX7:SOX8:SOX9:SRY	AACAATGGAM	1e-11	-26.63	0	3574	0.21	5481.6	0.189
M00792_2.00:FOXP1:FOXP2:FOXP3:FOXP4	GTAAACAA	1e-11	-26.6	0	6272	0.3686	9955.6	0.3433
M04396_2.00:PRDM1	NCACTTTCMCTH	1e-11	-26.53	0	1074	0.0631	1481.1	0.0511
M01822_2.00:JUN:JUNB:JUND	ATGACTCAH	1e-11	-26.46	0	1216	0.0715	1701.8	0.0587
M02256_2.00:IRF5	AHCGAAACTR	1e-11	-26.4	0	426	0.025	512.2	0.0177
M00410_2.00:HOXA10:HOXA11:HOXA5:HOXA6:HOXA7:HOXA9:HOXB5:HOXB6:HOXB8:HOXB9:HOXC10:HOXC11:HOXC5:HOXC6:HOXC8:HOXC9:HOXD10:HOXD11:HOXD8:HOXD9	TTTTATKRCN	1e-11	-26.3	0	9070	0.533	14693.1	0.5067
M02874_2.00:PRDM1	NCACTTTCACTTTCW	1e-11	-26.1	0	94	0.0055	72	0.0025
M09880_2.00:MITF:TFE3:TFEB:TFEC	RKCACATGAYN	1e-11	-25.87	0	4263	0.2505	6623.9	0.2284
M11296_2.00:SOX1:SOX10:SOX11:SOX12:SOX13:SOX14:SOX15:SOX17:SOX18:SOX2:SOX21:SOX3:SOX30:SOX4:SOX5:SOX6:SOX7:SOX8:SOX9:SRY	ACAAWGVC	1e-11	-25.77	0	12621	0.7416	20833.4	0.7185
M08704_2.00:TFAP2A:TFAP2B:TFAP2C:TFAP2D:TFAP2E	GCCTCAGGSCAT	1e-11	-25.73	0	785	0.0461	1045.6	0.0361
M08720_2.00:MXI1	SCACGTGGSNGSSGS	1e-11	-25.69	0	307	0.018	347.2	0.012
M08754_2.00:MXD1:MXI1	SCACGTGGSNGSSGS	1e-11	-25.69	0	307	0.018	347.2	0.012
M07566_2.00:ZNF324:ZNF324B	TCRAACCATCCTTGC	1e-11	-25.51	0	115	0.0068	97.8	0.0034
M04197_2.00:BHLHA15	AACAGCTGTT	1e-11	-25.43	0	1395	0.082	1988.7	0.0686
M04511_2.00:KLF15	VCCACGCCCMCC	1e-11	-25.34	0	1532	0.09	2204.5	0.076
M07876_2.00:CTCF	GCGCCCCCTGGTGGC	1e-10	-25.26	0	64	0.0038	41.4	0.0014
M10755_2.00:BARX1:BARX2:BSX:EMX1:EMX2:EN1:EN2:EVX1:EVX2:GBX1:GBX2:GSX1:GSX2:HMX1:HMX2:HMX3:HOXA1:HOXA2:HOXA3:HOXA4:HOXA5:HOXA6:HOXA7:HOXB1:HOXB2:HOXB3:HOXB4:HOXB5:HOXB6:HOXB7:HOXB8:HOXC4:HOXC5:HOXC6:HOXD1:HOXD3:HOXD4:HOXD8:ISX:MEOX1:MEOX2:MNX1:NKX1-1:NKX1-2:NOTO:OTP:PDX1:TLX2:VAX1:VAX2:VENTX	ATAATTRG	1e-10	-25.1	0	8827	0.5187	14298.7	0.4931
M04506_2.00:ZNF75A:ZNF75D	RTGTGGGAAAAGCT	1e-10	-24.95	0	30	0.0018	11.4	0.0004
M02323_2.00:TERF2	NAACCCTAR	1e-10	-24.9	0	1199	0.0705	1686.1	0.0581
M09790_2.00:MITF:TFE3	GYCASVTGACYN	1e-10	-24.84	0	1104	0.0649	1539	0.0531
M10818_2.00:PAX3:PAX7	AAATTRY	1e-10	-24.82	0	11992	0.7047	19750	0.6811
M08864_2.00:PATZ1	CCYCCBCCCCCKCCCCCTCCCC	1e-10	-24.8	0	138	0.0081	126.6	0.0044
M09479_2.00:USF2	ACCACGTGAC	1e-10	-24.71	0	2052	0.1206	3036.3	0.1047
M08994_2.00:EGR1:EGR2:EGR3:EGR4	CCCCCRCCCACRCM	1e-10	-24.67	0	710	0.0417	938.1	0.0324
M09986_2.00:HLF:TEF	GTTACRTAAT	1e-10	-24.59	0	1055	0.062	1465	0.0505
M00742_2.00:RBPJ	NDTTCCCAC	1e-10	-24.58	0	9676	0.5686	15757.9	0.5434
M04438_2.00:EGR1:EGR2:EGR3:EGR4	CCCGCCCACGCVC	1e-10	-24.57	0	1155	0.0679	1620.5	0.0559
M09837_2.00:MAX	CCRGCCACGTGC	1e-10	-24.5	0	397	0.0233	478.8	0.0165
M03842_2.00:CRX:DMBX1:DPRX:GSC:GSC2:OTX1:OTX2:PITX1:PITX2:PITX3:TPRX1	VTAATCCM	1e-10	-24.46	0	6243	0.3668	9939.7	0.3428
M10604_2.00:GCM1:GCM2	CMNRCCCGCATD	1e-10	-24.44	0	836	0.0491	1130.6	0.039
M07875_2.00:CTCF	GCGCCCCCTGGTGGC	1e-10	-24.31	0	55	0.0032	33.1	0.0011
M06193_2.00:ELF1:ELF2:ELF4:ELK1:ELK3:ELK4:ERF:ERG:ETS1:ETS2:ETV1:ETV2:ETV3:ETV3L:ETV4:ETV5:FEV:FLI1:GABPA	ACCGGAAGTVV	1e-10	-24.2	0	133	0.0078	121	0.0042
M03298_2.00:POU2F2	WTATGCAAATK	1e-10	-24.14	0	1803	0.1059	2644.8	0.0912
M01557_2.00:MEF2A	TTAATAAA	1e-10	-24.12	0	642	0.0377	839.4	0.0289
M03405_2.00:ESR1:ESR2:HNF4A:HNF4G:NR1D1:NR1D2:NR1H2:NR1H3:NR1H4:NR2C1:NR2C2:NR2F1:NR2F2:NR2F6:NR4A1:NR4A2:NR4A3:NR5A2:NR6A1:PPARA:PPARD:PPARG:RARA:RARB:RARG:RORA:RORB:RORC:RXRA:RXRB:RXRG:THRA:THRB	GRGGTCAA	1e-10	-24.09	0	4611	0.2709	7223.5	0.2491
M11240_2.00:RELA	AAATCCCCT	1e-10	-24.08	0	885	0.052	1208	0.0417
M04230_2.00:ATF1:CREB1:CREM	BRTGACATCACN	1e-10	-24.01	0	746	0.0438	996.5	0.0344
M04115_2.00:MAX	AKCACATGGY	1e-10	-23.99	0	4525	0.2659	7082.7	0.2443
M07893_2.00:CTCF	SYGCCMYCTGGTGGC	1e-10	-23.98	0	112	0.0066	96.7	0.0033
M03040_2.00:FOXO4	GTAAACA	1e-10	-23.91	0	5016	0.2947	7898.4	0.2724
M09463_2.00:MYF5:MYF6:MYOD1:MYOG	BAACAGCTGT	1e-10	-23.89	0	1097	0.0645	1535.1	0.0529
M00797_2.00:FOXO1:FOXO3:FOXO4:FOXO6:FOXP4	GTAAACAA	1e-10	-23.89	0	6486	0.3811	10356.3	0.3571
M09497_2.00:MAF:MAFA:MAFB:MAFG:MAFK:NRL	TGAGTCAGCA	1e-10	-23.81	0	769	0.0452	1032.2	0.0356
M07888_2.00:CTCF	CGCCCYCTGGTGGCC	1e-10	-23.8	0	92	0.0054	73.6	0.0025
M03156_2.00:ALX1:ALX3:ALX4:ARX:BARHL1:BARHL2:BARX1:BARX2:BSX:DLX1:DLX2:DLX3:DLX4:DLX5:DLX6:DRGX:EMX1:EMX2:EN1:EN2:ESX1:EVX1:EVX2:GBX1:GBX2:GSX1:GSX2:HMX1:HMX2:HMX3:HOXA1:HOXA2:HOXA3:HOXA4:HOXA5:HOXA6:HOXA7:HOXB1:HOXB2:HOXB3:HOXB4:HOXB5:HOXB6:HOXB7:HOXB8:HOXC4:HOXC5:HOXC6:HOXD1:HOXD3:HOXD4:HOXD8:ISX:LHX3:LHX4:MEOX1:MEOX2:MIXL1:MNX1:MSX1:MSX2:NANOG:NANOGP8:NKX1-1:NKX1-2:NOBOX:NOTO:OTP:PDX1:PHOX2A:P…	YTAATTAB	1e-10	-23.69	0	6874	0.4039	11012.5	0.3798
M05765_2.00:SOX1:SOX10:SOX11:SOX12:SOX13:SOX14:SOX15:SOX17:SOX18:SOX2:SOX21:SOX3:SOX30:SOX4:SOX5:SOX6:SOX7:SOX8:SOX9:SRY	GAACAAAGGV	1e-10	-23.65	0	4313	0.2534	6736.3	0.2323
M07878_2.00:CTCF	GCGCCCCCTGGTGGC	1e-10	-23.63	0	47	0.0028	26.7	0.0009
M02731_2.00:PRDM1	CACTTTCACTTT	1e-10	-23.63	0	82	0.0048	62.4	0.0022
M04092_2.00:MSC:TCF21	CAACAGCTGTTA	1e-10	-23.41	0	373	0.0219	448.9	0.0155
M07993_2.00:HNF4G:NR1H4:NR2C1:NR2C2:NR2F1:NR2F2:NR2F6:NR4A1:NR4A2:NR4A3:NR5A1:NR5A2:NR6A1:PPARA:PPARD:PPARG:RARA:RARB:RARG:RORA:RORB:RORC:RXRA:RXRB:RXRG:THRA:THRB	AGAGGTCA	1e-10	-23.35	0	6189	0.3637	9866.6	0.3403
M08172_2.00:STAT3	YTTCCCAGAAR	1e-10	-23.34	0	1367	0.0803	1961	0.0676
M07877_2.00:CTCF	RGCGCCCCCTGGTGG	1e-10	-23.31	0	78	0.0046	58.9	0.002
M09233_2.00:IRF1:IRF2	RAAANWGAAASTGAAAGTAA	1e-10	-23.19	0	167	0.0098	166.8	0.0058
M03823_2.00:ALX1:ALX3:ALX4:ARX:BARHL1:BARHL2:DRGX:ESX1:EVX1:EVX2:GBX1:GBX2:HESX1:LBX1:LBX2:MEOX1:MEOX2:MIXL1:MSX1:MSX2:PHOX2A:PHOX2B:PROP1:PRRX1:PRRX2:RAX:RAX2:SHOX:SHOX2:TLX1:TLX3:UNCX:VSX1:VSX2	STAATTGS	1e-10	-23.18	0	8591	0.5048	13928.7	0.4803
M06072_2.00:EGR1:EGR2:EGR3:EGR4	CCMCGCCCACRCAC	1e-10	-23.13	0	562	0.033	725.8	0.025
M05383_2.00:CRX:DMBX1:DPRX:GSC:GSC2:OTX1:OTX2:PITX1:PITX2:PITX3:TPRX1	STAATCCS	1e-10	-23.08	0	6858	0.403	10995.2	0.3792
M07641_2.00:ZNF266	ANTACTCACAGGYCC	1e-09	-23.01	0	123	0.0072	111.3	0.0038
M01683_2.00:HMGA1:HMGA2	NRNWWWWNYN	1e-09	-22.96	0	5786	0.34	9197.5	0.3172
M04187_2.00:MSC:TCF21	YAACAGCTGTTR	1e-09	-22.95	0	493	0.029	624.9	0.0215
M03081_2.00:ALX1:ALX3:ALX4:ARX:BARHL1:BARHL2:BARX1:BARX2:BSX:DLX1:DLX2:DLX3:DLX4:DLX5:DLX6:DRGX:EMX2:EN1:EN2:GBX1:GBX2:GSX1:GSX2:HOXA1:HOXA2:HOXA3:HOXB1:HOXB2:HOXB3:HOXD1:HOXD3:ISX:LHX1:LHX5:MEOX1:MEOX2:MNX1:MSX1:MSX2:NANOG:NANOGP8:NKX1-1:NKX1-2:PDX1:PHOX2A:PHOX2B:PROP1:PRRX1:PRRX2:SHOX:SHOX2:UNCX:VAX1:VAX2:VSX1:VSX2	NTAATTRB	1e-09	-22.8	0	5898	0.3466	9387.7	0.3237
M04679_2.00:CUX1:CUX2	YRATCGATAN	1e-09	-22.74	0	2077	0.122	3097	0.1068
M01992_2.00:FOXI1:FOXI3:FOXJ2:FOXJ3:FOXP3	ATAAACAA	1e-09	-22.73	0	5541	0.3256	8791.5	0.3032
M03976_2.00:SOX1:SOX10:SOX11:SOX12:SOX13:SOX14:SOX15:SOX17:SOX18:SOX2:SOX21:SOX3:SOX30:SOX4:SOX5:SOX6:SOX7:SOX8:SOX9:SRY	MCGAACAATGN	1e-09	-22.59	0	1522	0.0894	2212.5	0.0763
M08276_2.00:PRDM1	YYYTCACTTTCHCTT	1e-09	-22.45	0	1146	0.0673	1622.5	0.056
M00508_2.00:HOXA10:HOXA11:HOXC10:HOXC11:HOXC12:HOXD10:HOXD11:HOXD12:MEOX1	DTTTAYKRBN	1e-09	-22.38	0	9327	0.5481	15197.4	0.5241
M05745_2.00:NFIA:NFIB:NFIC:NFIX	STTGGCDNNGTGCCARB	1e-09	-22.37	0	48	0.0028	29	0.001
M07879_2.00:CTCF	GCGCCCCCTGGTGGC	1e-09	-22.32	0	49	0.0029	29.4	0.001
M00447_2.00:CDX1:CDX2:CDX4	TTTATKRYN	1e-09	-22.27	0	11395	0.6696	18755.9	0.6468
M09967_2.00:JUN:JUNB:JUND	AGTCATAHTGAA	1e-09	-22.21	0	639	0.0375	845	0.0291
M07954_2.00:ELF1:ELF2:ELF4:ELK1:ELK3:ELK4:ERF:ERG:ETS1:ETS2:ETV1:ETV2:ETV3:ETV3L:ETV4:ETV5:FEV:FLI1:GABPA	GVRCCGGAAGTGGN	1e-09	-22.18	0	137	0.0081	130.5	0.0045
M02910_2.00:SP1:SP3:SP4:SP5:SP6:SP8:SP9	VCCACGCCCMC	1e-09	-22.1	0	1952	0.1147	2902.9	0.1001
M08996_2.00:EGR1:EGR2:EGR3:EGR4	CCCCGCCCMCGCMC	1e-09	-21.93	0	336	0.0197	401.4	0.0138
M08167_2.00:LEF1:TCF7:TCF7L1:TCF7L2	RAASATCAAAGGVA	1e-09	-21.61	0	550	0.0323	715.4	0.0247
M06559_2.00:SOX1:SOX10:SOX11:SOX12:SOX13:SOX14:SOX15:SOX17:SOX18:SOX2:SOX21:SOX3:SOX30:SOX4:SOX5:SOX6:SOX7:SOX8:SOX9:SRY	TCCATTGTTBT	1e-09	-21.61	0	1922	0.1129	2859.6	0.0986
M09493_2.00:ATF2:CREB5	NRRTGACGTCAT	1e-09	-21.6	0	860	0.0505	1185.1	0.0409
M10602_2.00:GCM1:GCM2	RCCCGCAT	1e-09	-21.51	0	3812	0.224	5939.3	0.2048
M00494_2.00:HOXA10:HOXA4:HOXA5:HOXA6:HOXA7:HOXA9:HOXB4:HOXB5:HOXB6:HOXB7:HOXB8:HOXB9:HOXC10:HOXC4:HOXC5:HOXC6:HOXC8:HOXC9:HOXD10:HOXD4:HOXD8:HOXD9:MNX1:PDX1	TTAATKRCN	1e-09	-21.46	0	9809	0.5764	16038.9	0.5531
M08904_2.00:ZNF382	GTRGGRTCTGTAGTGATGTCTC	1e-09	-21.44	0	29	0.0017	12.4	0.0004
M07892_2.00:CTCF	RGYGCCCYCTRGTGG	1e-09	-21.33	0	104	0.0061	91.8	0.0032
M04189_2.00:MSC:TCF21	YAACAGCTGTTR	1e-09	-21.32	0	175	0.0103	181	0.0062
M11305_2.00:SOX1:SOX10:SOX11:SOX12:SOX13:SOX14:SOX15:SOX17:SOX18:SOX2:SOX21:SOX3:SOX30:SOX4:SOX5:SOX6:SOX7:SOX8:SOX9:SRY	HNAGAACAATGGRN	1e-09	-21.3	0	1461	0.0859	2127.6	0.0734
M04505_2.00:ZNF75A:ZNF75D	MGCTTTTCCCACAC	1e-09	-21.3	0	35	0.0021	17.1	0.0006
M10233_2.00:ZBTB7B	SCCCTCCCC	1e-09	-21.29	0	2471	0.1452	3748.8	0.1293
M10160_2.00:MAZ	CCCTCCCYCCC	1e-09	-21.25	0	1982	0.1165	2959	0.102
M10480_2.00:EHF:ELF1:ELF2:ELF3:ELF4:ELF5:ELK1:ELK3:ELK4:ERF:ERG:ETS1:ETS2:ETV1:ETV2:ETV3:ETV3L:ETV4:ETV5:ETV6:ETV7:FEV:FLI1:GABPA:SPDEF	TGSCAGGAAGTRGGTBDC	1e-09	-21.24	0	71	0.0042	53.6	0.0018
M02886_2.00:EGR1:EGR2:EGR3:EGR4	NHMCGCCCACGCAHH	1e-09	-21.2	0	52	0.0031	33.8	0.0012
M04504_2.00:ZNF75A:ZNF75D	MGCTTTTCCCACAC	1e-09	-21.18	0	92	0.0054	77.5	0.0027
M01558_2.00:SRF	CNAAWNNGGA	1e-09	-21.14	0	6708	0.3942	10775.2	0.3716
M11281_2.00:NFIA:NFIB:NFIC:NFIX	CTGGCAGGV	1e-09	-20.93	0	2445	0.1437	3710.3	0.128
M08782_2.00:NFE2:NFE2L1:NFE2L2:NFE2L3	NATGACT	1e-09	-20.8	0	11926	0.7008	19700.2	0.6794
M08831_2.00:NFE2:NFE2L1:NFE2L2:NFE2L3	NATGACT	1e-09	-20.8	0	11926	0.7008	19700.2	0.6794
M03585_2.00:TFAP2A:TFAP2B:TFAP2E	TGCCCBVGGGCA	1e-09	-20.79	0	529	0.0311	688.7	0.0238
M04926_2.00:ALX1:ALX3:ALX4:ARX:BARHL1:BARHL2:BARX1:BARX2:BSX:DLX1:DLX2:DLX3:DLX4:DLX5:DLX6:DRGX:EMX2:EN1:EN2:GBX1:GBX2:GSX1:GSX2:HOXA1:HOXA2:HOXA3:HOXB1:HOXB2:HOXB3:HOXD1:HOXD3:ISX:LHX1:LHX5:MEOX1:MEOX2:MNX1:MSX1:MSX2:NANOG:NANOGP8:NKX1-1:NKX1-2:PDX1:PHOX2A:PHOX2B:PROP1:PRRX1:PRRX2:SHOX:SHOX2:UNCX:VAX1:VAX2:VSX1:VSX2	NTAAYGAB	1e-09	-20.76	0	8498	0.4994	13812	0.4763
M07881_2.00:CTCF	CGCCCCCTGGTGGCC	1e-08	-20.66	0	73	0.0043	56.1	0.0019
M02092_2.00:HOXA13:HOXB13:HOXC13:HOXD13	WTTTATDRGN	1e-08	-20.62	0	11255	0.6614	18541.8	0.6394
M06239_2.00:ALX1:ALX3:ALX4:ARX:BARX1:BARX2:BSX:DLX1:DLX2:DLX3:DLX4:DLX5:DLX6:DRGX:EMX1:EMX2:EN1:EN2:ESX1:EVX1:EVX2:GBX1:GBX2:GSX1:GSX2:HESX1:HMX1:HMX3:HOXA1:HOXA2:HOXA3:HOXA4:HOXA5:HOXB1:HOXB2:HOXB3:HOXB4:HOXB5:HOXC4:HOXC5:HOXD1:HOXD3:HOXD4:ISX:LHX2:LHX3:LHX4:LHX6:LHX8:LHX9:LMX1A:LMX1B:MEOX1:MIXL1:MNX1:MSX1:MSX2:NKX1-1:NKX1-2:NOBOX:NOTO:OTP:PDX1:PHOX2A:PHOX2B:PROP1:PRRX1:PRRX2:RAX:RAX2:SEBOX:SHOX…	TTAATTA	1e-08	-20.54	0	8760	0.5147	14263	0.4919
M04583_2.00:EGR1:EGR2:EGR3:EGR4	HMCGCCCACGCAM	1e-08	-20.47	0	32	0.0019	15.1	0.0005
M03572_2.00:TBX1:TBX10	AGGTGTGA	1e-08	-20.36	0	2626	0.1543	4011.1	0.1383
M02885_2.00:EGR1:EGR2:EGR3:EGR4	ACGCCCACGCA	1e-08	-20.34	0	56	0.0033	38.9	0.0013
M05014_2.00:NKX3-1:NKX3-2	HTAACGAS	1e-08	-20.32	0	3472	0.204	5397	0.1861
M09806_2.00:TFAP4	CWCAGCTGGT	1e-08	-20.25	0	1761	0.1035	2615.9	0.0902
M08702_2.00:TFAP2A:TFAP2B:TFAP2C:TFAP2D:TFAP2E	TDGCCYCAGGSCAY	1e-08	-20.25	0	515	0.0303	670.3	0.0231
M10195_2.00:EGR1:EGR2:EGR3:EGR4	GCGGGGGCGG	1e-08	-20.23	0	644	0.0378	864.5	0.0298
M04052_2.00:TFAP2A:TFAP2B:TFAP2C:TFAP2D:TFAP2E	TGCCTSAGGCW	1e-08	-20.22	0	903	0.0531	1261.9	0.0435
M07569_2.00:ZNF343	CGCTTCCCC	1e-08	-20.12	0	1652	0.0971	2442.4	0.0842
M10001_2.00:FOS:FOSB:FOSL1:FOSL2	TGAGTCAT	1e-08	-19.95	0	3705	0.2177	5785.9	0.1995
M09079_2.00:EHF:ELF1:ELF2:ELF3:ELF4:ELF5:ELK1:ELK3:ELK4:ERF:ERG:ETS1:ETS2:ETV1:ETV2:ETV3:ETV3L:ETV4:ETV5:ETV6:ETV7:FEV:FLI1:GABPA:SPDEF	GAACCCGGAAGTGG	1e-08	-19.88	0	126	0.0074	121.2	0.0042
M07907_2.00:CTCF	BRGYGCCMYCTRGTGGCC	1e-08	-19.87	0	63	0.0037	46.8	0.0016
M02827_2.00:DBP	NRTTACGTAACM	1e-08	-19.67	0	240	0.0141	274.7	0.0095
M07886_2.00:CTCF	GCGCCCYCTGGTGGC	1e-08	-19.67	0	70	0.0041	55	0.0019
M02982_2.00:ELF1:ELF2:ELF4:ELK1:ELK3:ELK4:ERF:ERG:ETS1:ETS2:ETV1:ETV2:ETV3:ETV3L:ETV4:ETV5:FEV:FLI1:GABPA	ACCGGAAGTR	1e-08	-19.64	0	108	0.0063	99.8	0.0034
M07920_2.00:CTCF	RSYGCCCYCTRGTGGCCA	1e-08	-19.5	0	57	0.0033	40.3	0.0014
M00996_2.00:CEBPG	NTTRCGCAATN	1e-08	-19.43	0	217	0.0128	243.6	0.0084
M11109_2.00:HNF4A:HNF4G:NR2E1:NR2F1:NR2F2:NR2F6:NR6A1:RXRB:RXRG	VTGAACTTTGMMC	1e-08	-19.37	0	395	0.0232	498	0.0172
M01171_2.00:PLAGL2	NGGGCCCCCT	1e-08	-19.35	0	833	0.0489	1159.8	0.04
M04461_2.00:EGR1:EGR2:EGR3:EGR4	CMCGCCCACGCAM	1e-08	-19.24	0	42	0.0025	25.7	0.0009
M04903_2.00:ALX1:ALX3:ALX4:ARX:BARHL1:BARHL2:BARX1:BARX2:BSX:DLX1:DLX2:DLX3:DLX4:DLX5:DLX6:DRGX:EMX1:EMX2:EN1:EN2:ESX1:EVX1:EVX2:GBX1:GBX2:GSX1:GSX2:HMX1:HMX2:HMX3:HOXA1:HOXA2:HOXA3:HOXA4:HOXA5:HOXB1:HOXB2:HOXB3:HOXB4:HOXB5:HOXC12:HOXC4:HOXC5:HOXD1:HOXD3:HOXD4:ISX:LBX1:LBX2:LHX1:LHX5:MEOX1:MEOX2:MIXL1:MNX1:MSX1:MSX2:NANOG:NANOGP8:NKX1-1:NKX1-2:OTP:PDX1:PHOX2A:PHOX2B:PROP1:PRRX1:PRRX2:RAX:RAX2:SEB…	HTAATGAY	1e-08	-19.24	0	5980	0.3514	9584.3	0.3305
M09391_2.00:SOX1:SOX10:SOX11:SOX12:SOX13:SOX14:SOX15:SOX17:SOX18:SOX2:SOX21:SOX3:SOX30:SOX4:SOX5:SOX6:SOX7:SOX8:SOX9:SRY	BCCTTTGTBYB	1e-08	-19.23	0	4359	0.2561	6878.1	0.2372
M08739_2.00:BHLHA15	GCAGCAGCTGG	1e-08	-19.22	0	857	0.0504	1197.1	0.0413
M08774_2.00:BHLHA15	GCAGCAGCTGG	1e-08	-19.22	0	857	0.0504	1197.1	0.0413
M02062_2.00:HOXA10:HOXA6:HOXA7:HOXB6:HOXB7:HOXB8:HOXC10:HOXC6:HOXC8:HOXD10:HOXD8	TTAATKRSNH	1e-08	-19.21	0	10198	0.5992	16746.9	0.5775
M04921_2.00:CRX:DMBX1:DPRX:GSC:GSC2:OTX1:OTX2:PITX1:PITX2:PITX3:TPRX1	CTAATCCB	1e-08	-19.21	0	6616	0.3888	10654.4	0.3674
M07866_2.00:CTCF	GCGCCCYCTGGTGGC	1e-08	-19.19	0	85	0.005	72.4	0.0025
M10561_2.00:FOXC1:FOXC2:FOXD1:FOXD2:FOXD3:FOXD4:FOXD4L1:FOXD4L3:FOXD4L4:FOXD4L5:FOXD4L6:FOXE1:FOXF1:FOXF2:FOXG1:FOXI1:FOXI3:FOXL1:FOXL2:FOXS1	AGHCAAAACAA	1e-08	-19.17	0	2729	0.1604	4194.8	0.1447
M07869_2.00:CTCF	GCGCCCCCTGGTGGC	1e-08	-19.17	0	64	0.0038	48.2	0.0017
M09460_2.00:USF1:USF2	YCACGTGACS	1e-08	-19.13	0	557	0.0327	739.3	0.0255
M04394_2.00:SNAI2	TGCACCTGTY	1e-08	-19.12	0	1811	0.1064	2707.9	0.0934
M04168_2.00:ATOH1	AACAGCTGTC	1e-08	-19.05	0	744	0.0437	1024.4	0.0353
M07912_2.00:CTCF	GYGCCCCCTGGTGGC	1e-08	-18.93	0	88	0.0052	76.1	0.0026
M04668_2.00:ONECUT1:ONECUT2:ONECUT3	KTATTGATTN	1e-08	-18.86	0	628	0.0369	848.4	0.0293
M07913_2.00:CTCF	GCGCCCCCTGGTGGC	1e-08	-18.86	0	69	0.0041	54.8	0.0019
M03118_2.00:ALX1:ALX3:ALX4:ARX:BARHL1:BARHL2:BARX1:BARX2:BSX:DLX1:DLX2:DLX3:DLX4:DLX5:DLX6:DRGX:EMX1:EMX2:EN1:EN2:GBX1:GBX2:GSX1:GSX2:HMX1:HMX3:HOXA1:HOXA2:HOXA3:HOXB1:HOXB2:HOXB3:HOXD1:HOXD3:ISX:LHX1:LHX5:MEOX1:MEOX2:MNX1:MSX1:MSX2:NANOG:NANOGP8:NKX1-1:NKX1-2:PDX1:PHOX2A:PHOX2B:PROP1:PRRX1:PRRX2:SHOX:SHOX2:UNCX:VAX1:VAX2:VSX1:VSX2	NTAATTGB	1e-08	-18.81	0	7533	0.4426	12211	0.4211
M10349_2.00:ZNF697	NTGGGCATCGGC	1e-08	-18.78	0	135	0.0079	135	0.0047
M10196_2.00:EGR1:EGR2:EGR3:EGR4	GCGGGGGCGG	1e-08	-18.77	0	493	0.029	645.2	0.0222
M05537_2.00:IRF5	CCGAAACCGAAACY	1e-08	-18.76	0	19	0.0011	6.7	0.0002
M09943_2.00:NFE2:NFE2L1:NFE2L2:NFE2L3	YTGCTGAGTCASB	1e-08	-18.74	0	742	0.0436	1023.2	0.0353
M04094_2.00:MSC:TCF21	CAACAGCTGTTR	1e-08	-18.69	0	141	0.0083	143.7	0.005
M07885_2.00:CTCF	GCGCCCCCTGGTGGC	1e-08	-18.68	0	67	0.0039	52.7	0.0018
M00391_2.00:HOXA10:HOXA5:HOXA6:HOXA7:HOXA9:HOXB5:HOXB6:HOXB7:HOXB8:HOXB9:HOXC10:HOXC5:HOXC6:HOXC8:HOXC9:HOXD10:HOXD8:HOXD9	TTWATKRBN	1e-08	-18.67	0	11840	0.6957	19588.4	0.6755
M11362_2.00:STAT4	TTCCVAGAADHMMA	1e-08	-18.67	0	780	0.0458	1082.9	0.0373
M03733_2.00:ELF1:ELF2:ELF4:ELK1:ELK3:ELK4:ERF:ERG:ETS1:ETS2:ETV1:ETV2:ETV3:ETV3L:ETV4:ETV5:FEV:FLI1:GABPA	ACCGKAAGTG	1e-08	-18.56	0	265	0.0156	313.9	0.0108
M10296_2.00:SP1:SP3:SP4:SP5:SP8:SP9	AAAGGGG	1e-07	-18.41	0	3742	0.2199	5869.1	0.2024
M07864_2.00:CTCF	RGCGCCCYCTRGTGG	1e-07	-18.4	0	102	0.006	94.2	0.0033
M08721_2.00:MYF5:MYF6:MYOD1:MYOG	CHGCAGCTGTCCY	1e-07	-18.38	0	882	0.0518	1242.1	0.0428
M08755_2.00:MYF5:MYF6:MYOD1:MYOG	CHGCAGCTGTCCY	1e-07	-18.38	0	882	0.0518	1242.1	0.0428
M07895_2.00:CTCF	VBRGCGCCCCCTRGTGGC	1e-07	-18.36	0	71	0.0042	57.3	0.002
M07870_2.00:CTCF	GCGCCCYCTGGTGGC	1e-07	-18.33	0	77	0.0045	64.1	0.0022
M05468_2.00:POU2F3	DTATGCWAATN	1e-07	-18.28	0	2318	0.1362	3536	0.1219
M06228_2.00:BARX1:BARX2:BSX:EMX1:EMX2:EN1:EN2:EVX1:EVX2:GBX1:GBX2:GSX1:GSX2:HESX1:HMX1:HMX2:HMX3:HOXA1:HOXA2:HOXA3:HOXA4:HOXA5:HOXA6:HOXA7:HOXB1:HOXB2:HOXB3:HOXB4:HOXB5:HOXB6:HOXB7:HOXB8:HOXC4:HOXC5:HOXC6:HOXD1:HOXD3:HOXD4:HOXD8:ISX:MEOX1:MEOX2:MNX1:NKX1-1:NKX1-2:NOTO:OTP:PDX1:TLX1:TLX3:VAX1:VAX2:VENTX	NYTAATGA	1e-07	-18.24	0	7108	0.4177	11502.8	0.3967
M01816_2.00:JUN:JUNB:JUND	ATGACGYAW	1e-07	-18.22	0	2865	0.1684	4429.6	0.1528
M10152_2.00:CTCF	NYGGCCASCAGGGGGCRSYV	1e-07	-18.18	0	46	0.0027	30.1	0.001
M07883_2.00:CTCF	BRGCGCCCCCTGGTGGC	1e-07	-18.16	0	43	0.0025	27.5	0.0009
M07791_2.00:MAX	SASCACGTGACYB	1e-07	-18.13	0	482	0.0283	633	0.0218
M03464_2.00:RUNX1:RUNX2:RUNX3	WAACCGCAAACCGCAA	1e-07	-17.97	0	17	0.001	5.9	0.0002
M11163_2.00:AR:NR3C1:NR3C2:PGR	AGAACAGVSSNNNNN	1e-07	-17.94	0	3711	0.2181	5825.5	0.2009
M07910_2.00:CTCF	CNVBRGCGCCCCCTGGTGGC	1e-07	-17.93	0	24	0.0014	10	0.0003
M04752_2.00:ELF1:ELF2:ELF4:ELK1:ELK3:ELK4:ERF:ERG:ETS1:ETS2:ETV1:ETV2:ETV3:ETV3L:ETV4:ETV5:FEV:FLI1:GABPA	NACCGGAAGTG	1e-07	-17.9	0	110	0.0065	105.7	0.0036
M07898_2.00:CTCF	CGCCCCCTGGTGGC	1e-07	-17.89	0	102	0.006	95.8	0.0033
M08316_2.00:ZNF18	CCWGTTCACACC	1e-07	-17.82	0	579	0.034	780.7	0.0269
M07871_2.00:CTCF	GCCMCCTGGTGGCCR	1e-07	-17.81	0	78	0.0046	66	0.0023
M04729_2.00:EHF:ELF1:ELF2:ELF3:ELF4:ELF5:ELK1:ELK3:ELK4:ERF:ERG:ETS1:ETS2:ETV1:ETV2:ETV3:ETV3L:ETV4:ETV5:ETV6:ETV7:FEV:FLI1:GABPA:SPDEF	AATSCGGAAGTR	1e-07	-17.81	0	198	0.0116	222.1	0.0077
M03480_2.00:NFIA:NFIB:NFIC:NFIX	YTGGCACNDTGCCAA	1e-07	-17.72	0	31	0.0018	16.4	0.0006
M08238_2.00:CTCF	GCGCCCCCTGSTGGC	1e-07	-17.72	0	31	0.0018	16.8	0.0006
M04172_2.00:OLIG2:OLIG3	AACAGCTGYT	1e-07	-17.7	0	1642	0.0965	2451.5	0.0845
M07924_2.00:CTCF	RGCGCCCYCTGGTGG	1e-07	-17.67	0	87	0.0051	77.6	0.0027
M01247_2.00:DUXA	HTGATTGRY	1e-07	-17.64	0	5709	0.3355	9158.2	0.3158
M07904_2.00:CTCF	GCGCCCYCTGGTGGC	1e-07	-17.49	0	69	0.0041	56.6	0.002
M00113_2.00:TFAP2A:TFAP2B:TFAP2C:TFAP2D:TFAP2E	YGCCCGAGGC	1e-07	-17.46	0	1897	0.1115	2864.9	0.0988
M04134_2.00:HEY1:HEY2:HEYL	SRCACGTGCS	1e-07	-17.43	0	1444	0.0849	2137.2	0.0737
M01751_2.00:ARNTL	DCACGTGACN	1e-07	-17.39	0	652	0.0383	894.1	0.0308
M07914_2.00:CTCF	GYGCCMYCTGGTGGC	1e-07	-17.36	0	89	0.0052	80.4	0.0028
M09475_2.00:MITF:TFE3:TFEB:TFEC	GTCACATGAY	1e-07	-17.32	0	1287	0.0756	1888.7	0.0651
M07862_2.00:CTCF	VBRGCGCCCCCTGGTGGCCRN	1e-07	-17.3	0	35	0.0021	20.5	0.0007
M00254_2.00:FOXC1:FOXC2:FOXD1:FOXD2:FOXD3:FOXD4:FOXD4L1:FOXD4L3:FOXD4L4:FOXD4L5:FOXD4L6:FOXE1:FOXF1:FOXF2:FOXG1:FOXI1:FOXI3:FOXK2:FOXL1:FOXL2:FOXS1	AATAAACANN	1e-07	-17.29	0	5763	0.3386	9255.2	0.3192
M01749_2.00:BHLHA15	ACATATGG	1e-07	-17.23	0	3700	0.2174	5818.5	0.2007
M04183_2.00:MSC:TCF21	HAACAGCTGTTN	1e-07	-17.22	0	932	0.0548	1329.5	0.0458
M10279_2.00:EGR1:EGR2:EGR3:EGR4	VTGCGTGGGCGT	1e-07	-17.2	0	37	0.0022	22	0.0008
M09926_2.00:NFE2:NFE2L1:NFE2L2:NFE2L3	GTCATBHWDBNNB	1e-07	-17.2	0	5924	0.3481	9527.2	0.3286
M02690_2.00:PAX2	HGTCACGB	1e-07	-17.17	0	8478	0.4982	13846.8	0.4775
M07887_2.00:CTCF	RGCGCCCYCTGGTGGCCR	1e-07	-17.14	0	41	0.0024	26.7	0.0009
M05102_2.00:ALX1:ALX3:ALX4:ARX:BARX1:BARX2:BSX:DLX1:DLX2:DLX3:DLX4:DLX5:DLX6:DRGX:EMX1:EMX2:EN1:EN2:ESX1:EVX1:EVX2:GBX1:GBX2:GSX1:GSX2:HMX1:HMX3:HOXA1:HOXA2:HOXA3:HOXA4:HOXA5:HOXA7:HOXB1:HOXB2:HOXB3:HOXB4:HOXB5:HOXB7:HOXC4:HOXC5:HOXD1:HOXD3:HOXD4:ISX:LHX3:LHX4:MEOX1:MEOX2:MIXL1:MNX1:MSX1:MSX2:NANOG:NANOGP8:NKX1-1:NKX1-2:NOTO:OTP:PDX1:PHOX2A:PHOX2B:PROP1:PRRX1:PRRX2:RAX:RAX2:SEBOX:SHOX:SHOX2:UNCX:…	YTAATGAC	1e-07	-17.04	0	2409	0.1416	3700.5	0.1276
M09451_2.00:TFAP2A:TFAP2B:TFAP2C:TFAP2D:TFAP2E	SCCTSAGGSCAW	1e-07	-16.93	0	887	0.0521	1261.9	0.0435
M04066_2.00:TFAP4	AHCATATGDT	1e-07	-16.83	0	3189	0.1874	4981.7	0.1718
M04969_2.00:BARX1:BARX2:BSX:EMX1:EMX2:EN1:EN2:EVX1:EVX2:GBX1:GBX2:GSX1:GSX2:HMX1:HMX2:HMX3:HOXA1:HOXA2:HOXA3:HOXA4:HOXA5:HOXA6:HOXA7:HOXA9:HOXB1:HOXB2:HOXB3:HOXB4:HOXB5:HOXB6:HOXB7:HOXB8:HOXB9:HOXC4:HOXC5:HOXC6:HOXC8:HOXC9:HOXD1:HOXD3:HOXD4:HOXD8:HOXD9:ISX:MEOX1:MEOX2:MNX1:NKX1-1:NKX1-2:NOTO:OTP:PDX1:VAX1:VAX2:VENTX	BTAATTAC	1e-07	-16.82	0	6504	0.3822	10511	0.3625
M07921_2.00:CTCF	CGCCMCCTGGTGGCC	1e-07	-16.76	0	74	0.0043	63	0.0022
M04444_2.00:SNAI1	YGCACCTGCT	1e-07	-16.71	0	1881	0.1105	2847.9	0.0982
M10190_2.00:EGR1:EGR2:EGR3:EGR4	CCGCCCCCG	1e-07	-16.67	0	191	0.0112	217	0.0075
M09395_2.00:LEF1:TCF7:TCF7L1:TCF7L2	TBYCTTTGATSTB	1e-07	-16.62	0	1139	0.0669	1660.2	0.0573
M03146_2.00:CRX:DMBX1:DPRX:GSC:GSC2:OTX1:OTX2:PITX1:PITX2:PITX3:TPRX1	VCTAATCCSY	1e-07	-16.55	0	2402	0.1411	3695.2	0.1274
M10885_2.00:IRF4:IRF8	RGGAAGTGA	1e-07	-16.55	0	6346	0.3729	10249.9	0.3535
M05742_2.00:NFIA:NFIB:NFIC:NFIX	STTGGCRNNGTGCCARS	1e-07	-16.51	0	49	0.0029	35.9	0.0012
M10879_2.00:IRF1:IRF2	GAAAAGYGAAACC	1e-07	-16.48	0	148	0.0087	158.2	0.0055
M00993_2.00:CEBPA:CEBPB:CEBPE	NTTGCGCAA	1e-07	-16.45	0	222	0.013	260.1	0.009
M00522_2.00:NKX6-1:NKX6-2:NKX6-3	NWTAATKRB	1e-07	-16.36	0	11317	0.665	18727.6	0.6458
M07917_2.00:CTCF	SYGCCMYCTRGTGGC	1e-07	-16.32	0	101	0.0059	97.1	0.0033
M03024_2.00:FOXO1:FOXO3:FOXO4:FOXO6	TTTCCCCACACG	1e-07	-16.27	0	155	0.0091	168.5	0.0058
M09387_2.00:SOX1:SOX10:SOX11:SOX12:SOX13:SOX14:SOX15:SOX17:SOX18:SOX2:SOX21:SOX3:SOX30:SOX4:SOX5:SOX6:SOX7:SOX8:SOX9:SRY	MAAAGGRDSCWTTGTT	1e-07	-16.26	0	256	0.015	309.3	0.0107
M09403_2.00:SOX1:SOX10:SOX11:SOX12:SOX13:SOX14:SOX15:SOX17:SOX18:SOX2:SOX21:SOX3:SOX30:SOX4:SOX5:SOX6:SOX7:SOX8:SOX9:SRY	MAAAGGRDSCWTTGTT	1e-07	-16.26	0	256	0.015	309.3	0.0107
M00784_2.00:ZNF740	CCCCCCCAYN	1e-07	-16.21	0	2239	0.1316	3434.2	0.1184
M07884_2.00:CTCF	GCGCCCCCTGGTGGC	1e-07	-16.18	0	79	0.0046	70.1	0.0024
M09406_2.00:LEF1:TCF7:TCF7L1:TCF7L2	BCCTTTGATST	1e-07	-16.16	0	1742	0.1024	2629.9	0.0907
M02756_2.00:TFAP2A:TFAP2B:TFAP2C:TFAP2D:TFAP2E	TGCCCBRGGGCA	1e-07	-16.16	0	468	0.0275	623	0.0215
M09416_2.00:STAT2	STTTCAGTTTCATTTTCYY	1e-06	-16.11	0	117	0.0069	119	0.0041
M09423_2.00:STAT2	STTTCAGTTTCATTTTCYY	1e-06	-16.11	0	117	0.0069	119	0.0041
M07896_2.00:CTCF	RGCGCCCCCTGGTGG	1e-06	-16.11	0	83	0.0049	75.9	0.0026
M09961_2.00:NFE2:NFE2L1:NFE2L2:NFE2L3	CATGACTCAGCAVWCC	1e-06	-15.89	0	125	0.0073	129.6	0.0045
M11161_2.00:AR:NR3C1:NR3C2:PGR	TGTTCY	1e-06	-15.88	0	12238	0.7191	20330.2	0.7011
M03878_2.00:ALX1:ALX3:ALX4:ARX:BARX1:BARX2:BSX:DLX1:DLX2:DLX3:DLX4:DLX5:DLX6:DRGX:EMX1:EMX2:EN1:EN2:ESX1:EVX1:EVX2:GBX1:GBX2:GSX1:GSX2:HESX1:HOXA1:HOXA2:HOXA3:HOXB1:HOXB2:HOXB3:HOXD3:ISL1:ISL2:ISX:LBX1:LBX2:LHX1:LHX2:LHX3:LHX4:LHX5:LHX6:LHX8:LHX9:LMX1A:LMX1B:MEOX1:MIXL1:MNX1:MSX1:MSX2:NKX1-1:NKX1-2:NOBOX:NOTO:OTP:PDX1:PHOX2A:PHOX2B:PROP1:PRRX1:PRRX2:RAX:RAX2:SEBOX:SHOX:SHOX2:UNCX:VAX1:VAX2:VSX1:V…	TAATTAAATTA	1e-06	-15.88	0	657	0.0386	912.2	0.0315
M08736_2.00:PTF1A	SCAGCTGCYBCYTYYCCC	1e-06	-15.86	0	243	0.0143	292.1	0.0101
M08757_2.00:PTF1A	SCAGCTGCYBCYTYYCCC	1e-06	-15.86	0	243	0.0143	292.1	0.0101
M10727_2.00:CRX:DMBX1:DPRX:GSC:GSC2:OTX1:OTX2:PITX1:PITX2:PITX3:TPRX1	YTAATCCC	1e-06	-15.8	0	5444	0.3199	8748	0.3017
M10292_2.00:WT1	GCGGGGGCGGGG	1e-06	-15.75	0	558	0.0328	761.4	0.0263
M03041_2.00:FOXO4	TTTCCCCACACG	1e-06	-15.73	0	159	0.0093	176	0.0061
M04468_2.00:ZNF740	CYGCCCCCCCCAC	1e-06	-15.68	0	164	0.0096	182.8	0.0063
M00810_2.00:ESR1:ESR2:NR1D1:NR1D2:NR1H2:NR1H3:NR1H4:NR2C1:NR2C2:NR2F1:NR2F2:NR2F6:NR4A1:NR4A2:NR4A3:NR5A2:NR6A1:PPARA:PPARD:PPARG:RARA:RARB:RARG:RORA:RORB:RORC:RXRA:RXRB:RXRG	NDAGGTCANN	1e-06	-15.66	0	10015	0.5885	16502.2	0.5691
M03479_2.00:NFIA:NFIB:NFIC:NFIX	YTGGCACNDTGCCAA	1e-06	-15.58	0	27	0.0016	14.4	0.0005
M07784_2.00:TFAP2A:TFAP2B:TFAP2C:TFAP2D:TFAP2E	RBNGCCTSAGGGCAN	1e-06	-15.51	0	423	0.0249	559	0.0193
M07919_2.00:CTCF	RGCGCCCYCTGGTGG	1e-06	-15.43	0	86	0.0051	80.5	0.0028
M07894_2.00:CTCF	SBRGCGCCCCCTGGTGG	1e-06	-15.43	0	45	0.0026	32.8	0.0011
M05257_2.00:DBX2:NKX3-1:NKX3-2	TTAACGAG	1e-06	-15.39	0	3517	0.2067	5545.6	0.1912
M03883_2.00:PAX4	CGTCACGCATGAVTG	1e-06	-15.39	0	8	0.0005	1.8	0.0001
M05533_2.00:IRF3	AGGAAACGGAAACCGAAACW	1e-06	-15.39	0	8	0.0005	1.1	0
M10744_2.00:NKX2-1:NKX2-2:NKX2-3:NKX2-4:NKX2-5:NKX2-6:NKX2-8	TSCCACTTGA	1e-06	-15.32	0	1907	0.1121	2906.5	0.1002
M03943_2.00:NR5A1:NR5A2	CAAGGTCAT	1e-06	-15.31	0	1971	0.1158	3010.9	0.1038
M04170_2.00:ARNT:ARNT2	GTCACGTGMN	1e-06	-15.29	0	497	0.0292	671.2	0.0231
M00505_2.00:HOXA13:HOXB13:HOXC13:HOXD13	WTTTAYDRSN	1e-06	-15.27	0	11484	0.6748	19037	0.6565
M08869_2.00:CTCF	BRGCGCCCCCTGGTGGCCR	1e-06	-15.26	0	30	0.0018	17.9	0.0006
M04099_2.00:MYF5:MYF6:MYOD1:MYOG	BAACAGCTGTYR	1e-06	-15.2	0	262	0.0154	322.6	0.0111
M04203_2.00:NEUROG1	RACATATGTY	1e-06	-15.18	0	447	0.0263	596.2	0.0206
M03722_2.00:ELF1:ELF2:ELF4:ELK1:ELK3:ELK4:ERF:ERG:ETS1:ETS2:ETV1:ETV2:ETV3:ETV3L:ETV4:ETV5:ETV6:ETV7:FEV:FLI1:GABPA	AAACCGGAAGTA	1e-06	-15.13	0	38	0.0022	25.1	0.0009
M07922_2.00:CTCF	CGCCCCCTGGTGG	1e-06	-15.13	0	122	0.0072	127.1	0.0044
M07614_2.00:ZNF180	CCCCASBCCCCDCCCCBCCCY	1e-06	-15.11	0	95	0.0056	93	0.0032
M04247_2.00:BACH1:BACH2	AAANCATGASTCATSNTTT	1e-06	-15.09	0	35	0.0021	22.4	0.0008
M08174_2.00:STAT4	YBVTTTCCYGGAAR	1e-06	-14.97	0	855	0.0502	1227.1	0.0423
M02792_2.00:USF1:USF2	RTCACGTGAY	1e-06	-14.93	0	947	0.0556	1372.3	0.0473
M00998_2.00:CEBPA:CEBPB:CEBPE	NTTRCGCAA	1e-06	-14.93	0	275	0.0162	343	0.0118
M07929_2.00:EGR1:EGR2:EGR3:EGR4	CCCCCSCCCCCGCCCMCGCM	1e-06	-14.72	0	61	0.0036	51.2	0.0018
M00515_2.00:GSC:TPRX1	WTAATCCCHN	1e-06	-14.67	0	5382	0.3163	8666.7	0.2989
M07874_2.00:CTCF	RGCGCCCCCTGGTGG	1e-06	-14.61	0	60	0.0035	50.1	0.0017
M00310_2.00:CRX:DMBX1:DPRX:GSC:GSC2:OTX1:OTX2:PITX1:PITX2:PITX3:TPRX1	TTAATCCY	1e-06	-14.6	0	5352	0.3145	8617.4	0.2972
M08014_2.00:STAT1	TTTCCYGGAAA	1e-06	-14.58	0	698	0.041	985.2	0.034
M03721_2.00:EBF1:EBF2:EBF3:EBF4	BWATTCCCWWGGGAATWV	1e-06	-14.57	0	10	0.0006	2.6	0.0001
M07841_2.00:MAF:MAFA:MAFB:MAFG:MAFK	GCTGASTCAGCAAWT	1e-06	-14.5	0	59	0.0035	49.7	0.0017
M07925_2.00:CTCF	RGCGCCCCCTGGTGG	1e-06	-14.45	0	78	0.0046	72.2	0.0025
M09413_2.00:STAT4	TTTCYYGGAAR	1e-06	-14.43	0	3065	0.1801	4814.3	0.166
M00111_2.00:TFAP2A:TFAP2B:TFAP2C:TFAP2D:TFAP2E	HGCCYBAGGS	1e-06	-14.43	0	3860	0.2268	6130.6	0.2114
M05779_2.00:LEF1:TCF7:TCF7L1:TCF7L2	ASATCAAAG	1e-06	-14.41	0	1524	0.0896	2298.1	0.0793
M07757_2.00:ZNF783	CSGCGKCC	1e-06	-14.39	0	272	0.016	340.1	0.0117
M07873_2.00:CTCF	CNVBRGCGCCCCCTGGTGGCC	1e-06	-14.39	0	19	0.0011	8.1	0.0003
M07889_2.00:CTCF	CGCCCYCTGGTGGC	1e-06	-14.39	0	113	0.0066	117.9	0.0041
M03332_2.00:IRF5	CCGAAACCGAAACT	1e-06	-14.37	0	26	0.0015	14.6	0.0005
M10486_2.00:EHF:ELF1:ELF2:ELF3:ELF4:ELF5:ELK1:ELK3:ELK4:ERF:ERG:ETS1:ETS2:ETV1:ETV2:ETV3:ETV3L:ETV4:ETV5:ETV6:ETV7:FEV:FLI1:GABPA:SPDEF	AGGAAG	1e-06	-14.35	0	9343	0.549	15380.7	0.5304
M08133_2.00:SIX1:SIX2:SIX4:SIX5	NNCTGAAACCTGATMC	1e-06	-14.32	0	81	0.0048	76.9	0.0027
M08206_2.00:GATA1:GATA2:GATA3:GATA4:GATA5:GATA6	GATAANVATCT	1e-06	-14.3	0	431	0.0253	577.6	0.0199
M04101_2.00:MYF5:MYF6:MYOD1:MYOG	BAACAGCTGTYV	1e-06	-14.3	0	163	0.0096	186	0.0064
M00989_2.00:CEBPD	NTTRCGCAA	1e-06	-14.27	0	303	0.0178	386.8	0.0133
M10500_2.00:EHF:ELF1:ELF2:ELF3:ELF4:ELF5:ETV6:ETV7:FEV	BTTCCTGC	1e-06	-14.26	0	9429	0.5541	15529.5	0.5355
M09523_2.00:E2F1:E2F2:E2F3:E2F4:E2F5:E2F6	GGCGGGAARN	1e-06	-14.25	0	1869	0.1098	2858.2	0.0986
M03240_2.00:POU5F1B	WTGCATATTCAT	1e-06	-14.23	0	729	0.0428	1036.2	0.0357
M10188_2.00:EGR1:EGR2:EGR3:EGR4	WTGCGTGGGCGT	1e-06	-14.2	0	38	0.0022	26.1	0.0009
M02195_2.00:CRX:DMBX1:DPRX:GSC:GSC2:OTX1:OTX2:PITX1:PITX2:PITX3:TPRX1	NHTAATCCSN	1e-06	-14.19	0	5266	0.3094	8481.6	0.2925
M07902_2.00:CTCF	RSYGCCCYCTRGTGG	1e-06	-14.14	0	111	0.0065	115.9	0.004
M07911_2.00:CTCF	RGCGCCCCCTGGTGGCCR	1e-06	-14.07	0	33	0.0019	21.9	0.0008
M04393_2.00:SNAI2	TGCACCTGTY	1e-06	-14.05	0	2053	0.1206	3160	0.109
M08786_2.00:HLF:TEF	GATTRYGTAACMS	1e-06	-14.01	0	315	0.0185	405.2	0.014
M00369_2.00:NR2E3	MGGGATCAAN	1e-06	-14	0	1421	0.0835	2137.2	0.0737
M07927_2.00:EGR1:EGR2:EGR3:EGR4	CCCCSCCCCCGCCCMCGCMC	1e-06	-13.98	0	54	0.0032	44	0.0015
M08878_2.00:ZBTB17	CYTCCCCTCCCCCWCCCYC	1e-06	-13.92	0	291	0.0171	370	0.0128
M07654_2.00:ZNF223	YGCCCCCTDGTGGC	1e-06	-13.9	0	157	0.0092	178.7	0.0062
M08977_2.00:GFI1:GFI1B	AAATCACAGC	1e-05	-13.77	0	2150	0.1263	3322.9	0.1146
M02976_2.00:ELF1:ELF2:ELF4:SPDEF	ACCCGGATGTR	1e-05	-13.7	0	76	0.0045	71.1	0.0025
M07903_2.00:CTCF	CGCCMYCTRGTGG	1e-05	-13.69	0	202	0.0119	242.9	0.0084
M07872_2.00:CTCF	RSYGCCMCCTGGTGG	1e-05	-13.65	0	94	0.0055	94.9	0.0033
M05741_2.00:NFIA:NFIB:NFIC:NFIX	STTGGCRBBGTGCCARB	1e-05	-13.62	0	62	0.0036	55	0.0019
M05310_2.00:HOXA10:HOXA4:HOXA5:HOXA6:HOXA7:HOXA9:HOXB4:HOXB5:HOXB6:HOXB7:HOXB8:HOXB9:HOXC10:HOXC4:HOXC5:HOXC6:HOXC8:HOXC9:HOXD10:HOXD4:HOXD8:HOXD9:MNX1:PDX1	GTAATKGC	1e-05	-13.61	0	5396	0.3171	8711.8	0.3004
M08055_2.00:ASCL1:ASCL2	SSAGCAGCTGGNV	1e-05	-13.59	0	743	0.0437	1063.2	0.0367
M04794_2.00:ELF1:ELF2:ELF4:ELK1:ELK3:ELK4:ERF:ERG:ETS1:ETS2:ETV1:ETV2:ETV3:ETV3L:ETV4:ETV5:FEV:FLI1:GABPA	ACAGGAAGGAAGTR	1e-05	-13.59	0	194	0.0114	231.3	0.008
M11382_2.00:TBX2:TBX3:TBX4:TBX5	TCACACCTG	1e-05	-13.55	0	3830	0.2251	6097	0.2103
M02752_2.00:EOMES:TBR1:TBX21:TBX5	AGGTGTGAA	1e-05	-13.42	0	1979	0.1163	3048.7	0.1051
M05877_2.00:NR1H4:NR1I2:NR1I3:VDR	TGAGTTCA	1e-05	-13.4	0	5090	0.2991	8202.2	0.2829
M09465_2.00:TCF12:TCF3:TCF4	ASWTCAAAGG	1e-05	-13.37	0	1279	0.0752	1916.4	0.0661
M02753_2.00:TFAP2A:TFAP2B:TFAP2C:TFAP2D:TFAP2E	TGCCCYRRGGCA	1e-05	-13.36	0	468	0.0275	639.7	0.0221
M04051_2.00:TFAP2A:TFAP2B:TFAP2C:TFAP2D:TFAP2E	YGCCTSRGGGCA	1e-05	-13.26	0	582	0.0342	815.1	0.0281
M07868_2.00:CTCF	SYGCCCYCTRGTGGC	1e-05	-13.22	0	94	0.0055	95.9	0.0033
M08365_2.00:ZSCAN30	GCCWGCRGCCHBCMS	1e-05	-13.19	0	383	0.0225	511.7	0.0176
M08727_2.00:MYCN	SCCCACGTGGCC	1e-05	-13.09	0	372	0.0219	495.6	0.0171
M07906_2.00:CTCF	DMYRSYGCCMYCTRGTGG	1e-05	-13.08	0	71	0.0042	66.3	0.0023
M11210_2.00:PAX1:PAX2:PAX3:PAX5:PAX6:PAX7:PAX8:PAX9	GTCACGCTTGGCTGCYCH	1e-05	-13.04	0	30	0.0018	19.5	0.0007
M08257_2.00:ZBTB18	NCGCAGCTGCGB	1e-05	-13	0	292	0.0172	376.5	0.013
M06489_2.00:DBX1:DBX2:HLX	TTWATTA	1e-05	-12.93	0	10803	0.6348	17914.6	0.6178
M10424_2.00:CUX1:CUX2	NATCGATCGS	1e-05	-12.93	0	489	0.0287	674.9	0.0233
M02399_2.00:NR1D2:NR1H2:NR1H3:NR1H4:NR2C1:NR2C2:NR2F1:NR2F2:NR2F6:NR4A1:NR4A2:NR4A3:NR5A2:NR6A1:PPARA:PPARD:PPARG:RARA:RARB:RARG:RORA:RORB:RORC:RXRA:RXRB:RXRG	RAGGTCAH	1e-05	-12.89	0	5185	0.3047	8372.3	0.2887
M10557_2.00:FOXA1:FOXA2:FOXA3:FOXB1:FOXS1	TGTTTGTT	1e-05	-12.83	0	7049	0.4142	11514.5	0.3971
M03331_2.00:IRF3	VSGAAAMGGAAACCGAAACTR	1e-05	-12.77	0	7	0.0004	1.6	0.0001
M05727_2.00:RFX5:RFX7	BGTTGCTRKGCGTTGCYRK	1e-05	-12.77	0	7	0.0004	1.1	0
M03804_2.00:HOXA10:HOXA5:HOXA6:HOXA7:HOXA9:HOXB4:HOXB5:HOXB6:HOXB7:HOXB8:HOXB9:HOXC10:HOXC5:HOXC6:HOXC8:HOXC9:HOXD10:HOXD8:HOXD9	KTAATTAC	1e-05	-12.72	0	6396	0.3758	10413.9	0.3591
M04050_2.00:TFAP2A:TFAP2B:TFAP2C:TFAP2D:TFAP2E	YGCCTSAGGCR	1e-05	-12.64	0	902	0.053	1322.9	0.0456
M04674_2.00:ONECUT1:ONECUT2:ONECUT3	DTATTGATYN	1e-05	-12.64	0	890	0.0523	1303.4	0.0449
M08871_2.00:KLF1:KLF12:KLF2:KLF3:KLF4:KLF5:KLF6:KLF7:KLF8	CCCGGCCMCRCCCH	1e-05	-12.6	0	509	0.0299	707.2	0.0244
M09680_2.00:HOXA10:HOXA5:HOXA6:HOXA7:HOXA9:HOXB4:HOXB5:HOXB6:HOXB7:HOXB8:HOXB9:HOXC10:HOXC5:HOXC6:HOXC8:HOXC9:HOXD10:HOXD8:HOXD9	TTAATKR	1e-05	-12.6	0	10062	0.5913	16650.8	0.5742
M02766_2.00:TFAP2A:TFAP2B:TFAP2C:TFAP2D:TFAP2E	TGCCCBVGGGCA	1e-05	-12.55	0	397	0.0233	536.5	0.0185
M10208_2.00:PLAGL2	GGGGGATCCCCA	1e-05	-12.41	0	9	0.0005	2.6	0.0001
M04962_2.00:ALX1:ALX3:ALX4:ARX:BARHL1:BARHL2:BARX1:BARX2:BSX:DLX1:DLX2:DLX3:DLX4:DLX5:DLX6:DRGX:EMX1:EMX2:EN1:EN2:ESX1:EVX1:EVX2:GBX1:GBX2:GSX1:GSX2:HESX1:HOXA1:HOXA2:HOXA3:HOXA4:HOXA5:HOXB1:HOXB2:HOXB3:HOXB4:HOXB5:HOXC4:HOXC5:HOXD1:HOXD3:HOXD4:ISX:LHX1:LHX3:LHX4:LHX5:MEOX1:MEOX2:MIXL1:MNX1:MSX1:MSX2:NANOG:NANOGP8:NKX1-1:NKX1-2:NOTO:OTP:PDX1:PHOX2A:PHOX2B:PROP1:PRRX1:PRRX2:RAX:RAX2:SEBOX:SHOX:SHO…	STAATTAC	1e-05	-12.4	0	5983	0.3516	9724.2	0.3353
M04612_2.00:ZNF396	CTGTCCAAAAA	1e-05	-12.37	0	316	0.0186	415.4	0.0143
M07916_2.00:CTCF	YRSYGCCMYCTRGTGGC	1e-05	-12.34	0	69	0.0041	65	0.0022
M05229_2.00:CRX:DMBX1:DPRX:GSC:GSC2:OTX1:OTX2:PITX1:PITX2:PITX3:TPRX1	STAATCCN	1e-05	-12.29	0	7406	0.4352	12131.6	0.4184
M06498_2.00:ISL1:ISL2:NOTO:SHOX:SHOX2:VSX1	TTAATKG	1e-05	-12.29	0	7194	0.4227	11772.4	0.406
M04627_2.00:ZNF460	CAACGCCCCCCGM	1e-05	-12.22	0	22	0.0013	12.5	0.0004
M03853_2.00:ALX1:ALX3:ALX4:ARX:DLX1:DLX2:DLX3:DLX4:DLX5:DLX6:DRGX:ESX1:HOXA2:HOXB2:ISX:LHX1:LHX2:LHX3:LHX4:LHX5:LHX9:MEOX1:MIXL1:MNX1:PHOX2A:PHOX2B:PROP1:PRRX1:PRRX2:RAX:RAX2:SEBOX:SHOX:SHOX2:UNCX:VSX1:VSX2	STAATTGS	1e-05	-12.2	0	5659	0.3325	9183.6	0.3167
M08726_2.00:BHLHE40:BHLHE41	RGCACGTGAS	1e-05	-12.19	0	664	0.039	951.7	0.0328
M02846_2.00:CREB3L1:CREB3L2	TGCCACGTGGCA	1e-05	-12.18	0	33	0.0019	23.6	0.0008
M07793_2.00:MAX	DGCACGTGGCY	1e-05	-12.18	0	1063	0.0625	1583.1	0.0546
M03438_2.00:TP63:TP73	DACATGTCYNGACATGYM	1e-05	-12.13	0	32	0.0019	22.5	0.0008
M08289_2.00:CTCF	RGCGCCCCCTGSYGG	1e-05	-12.11	0	54	0.0032	47.5	0.0016
M04798_2.00:ELF1:ELF2:ELF4:ELK1:ELK3:ELK4:ERF:ERG:ETS1:ETS2:ETV1:ETV2:ETV3:ETV3L:ETV4:ETV5:FEV:FLI1:GABPA	ACAGGAAGGAAGTR	1e-05	-12.08	0	185	0.0109	224.4	0.0077
M09342_2.00:PAX1:PAX2:PAX3:PAX5:PAX6:PAX7:PAX8:PAX9	RDGVGCAGCCAAGCGTGAC	1e-05	-12.03	0	29	0.0017	19.5	0.0007
M07948_2.00:EHF:ELF1:ELF2:ELF3:ELF4:ELF5:ELK1:ELK3:ELK4:ERF:ERG:ETS1:ETS2:ETV1:ETV2:ETV3:ETV3L:ETV4:ETV5:ETV6:ETV7:FEV:FLI1:GABPA:SPDEF	GAACCCGGAAGTGG	1e-05	-12.01	0	100	0.0059	106.1	0.0037
M09503_2.00:CTCF	AYAGTGCCMYCTRGTGGCCA	1e-05	-12	0	27	0.0016	17.9	0.0006
M04124_2.00:ARNTL	GTCACGTGMN	1e-05	-11.96	0	708	0.0416	1022.6	0.0353
M04917_2.00:ALX1:ALX3:ALX4:ARX:BARX1:BARX2:BSX:DLX2:DLX3:DLX5:DRGX:EMX1:EMX2:EN1:EN2:ESX1:EVX1:EVX2:GBX1:GBX2:GSX1:GSX2:HESX1:HOXA2:HOXA3:HOXB2:HOXB3:HOXD3:ISX:LBX1:LBX2:LHX1:LHX2:LHX3:LHX4:LHX5:LHX6:LHX8:LHX9:LMX1A:LMX1B:MEOX1:MIXL1:MNX1:MSX1:MSX2:NKX1-1:NKX1-2:NOBOX:NOTO:OTP:PDX1:PHOX2A:PHOX2B:PROP1:PRRX1:PRRX2:RAX:RAX2:SEBOX:SHOX:SHOX2:UNCX:VAX1:VAX2:VSX1:VSX2:ZFHX2:ZFHX3	BTAATTRG	1e-05	-11.96	0	5422	0.3186	8790.3	0.3031
M04067_2.00:TFAP4	AWCAGCTGWT	1e-05	-11.9	0	823	0.0484	1204.5	0.0415
M11123_2.00:AR:NR3C1:NR3C2:PGR	CWNWHTGTTCTNN	1e-05	-11.89	0	5599	0.329	9089.6	0.3135
M07673_2.00:ZNF479	NBNRTCCCCMGAGTCATC	1e-05	-11.85	0	61	0.0036	56.3	0.0019
M07890_2.00:CTCF	YGCCMYCTRGTGG	1e-05	-11.85	0	201	0.0118	248.9	0.0086
M05568_2.00:ESR1:ESR2:NR1D1:NR1D2:NR1H2:NR1H3:NR1H4:NR2C1:NR2C2:NR2F1:NR2F2:NR2F6:NR4A1:NR5A2:NR6A1:PPARA:PPARD:PPARG:RARA:RARB:RARG:RORA:RORB:RORC:RXRA:RXRB:RXRG	AAGGTCAYGACCTY	1e-05	-11.83	0	46	0.0027	38.1	0.0013
M07867_2.00:CTCF	GCCMYCTRGTGGY	1e-05	-11.77	0	189	0.0111	231.2	0.008
M04971_2.00:BARX1:BARX2:BSX:EMX1:EMX2:EN1:EN2:EVX1:EVX2:GBX1:GBX2:GSX1:GSX2:HMX1:HMX2:HMX3:HOXA1:HOXA2:HOXA3:HOXA4:HOXA5:HOXA6:HOXA7:HOXA9:HOXB1:HOXB2:HOXB3:HOXB4:HOXB5:HOXB6:HOXB7:HOXB8:HOXB9:HOXC4:HOXC5:HOXC6:HOXC8:HOXC9:HOXD1:HOXD3:HOXD4:HOXD8:HOXD9:ISX:MEOX1:MEOX2:MNX1:NKX1-1:NKX1-2:NOTO:OTP:PDX1:VAX1:VAX2:VENTX	STAATKAC	1e-05	-11.73	0	7959	0.4677	13083.4	0.4512
M05348_2.00:NKX2-1:NKX2-2:NKX2-3:NKX2-4:NKX2-5:NKX2-6:NKX2-8	CTCAACGAS	1e-05	-11.68	0	709	0.0417	1026.5	0.0354
M04073_2.00:TFAP4	AWCAGCTGWT	1e-05	-11.67	0	785	0.0461	1146.8	0.0395
M11338_2.00:LEF1:TCF7:TCF7L1:TCF7L2	RNANATCAAARSDAND	1e-05	-11.66	0	2101	0.1235	3273.6	0.1129
M00836_2.00:FOXC2:FOXJ3:FOXK2:FOXP1:FOXP2:FOXP3:FOXP4	NGTAAACAAN	1e-05	-11.62	0	5239	0.3079	8490.4	0.2928
M00160_2.00:FOXC2:FOXD1:FOXD2:FOXD3:FOXG1:FOXI1:FOXI2:FOXI3:FOXJ2:FOXJ3:FOXK1:FOXK2:FOXP1:FOXP3:FOXP4	NRTAAACAAA	1e-05	-11.6	0	5958	0.3501	9700.7	0.3345
M10549_2.00:FOXO1:FOXO3:FOXO4:FOXO6	MATAAACAAN	1e-05	-11.59	0	6841	0.402	11191.1	0.3859
M04204_2.00:NEUROG1	RACATATGTY	1e-05	-11.53	0	458	0.0269	636.5	0.0219
M00983_2.00:BCL11A	CTHCGGCCAN	1e-05	-11.52	0	3399	0.1997	5418.4	0.1869
M04121_2.00:MYF5:MYOD1:MYOG	YAACAGCTGTCG	0.0001	-11.47	0	318	0.0187	423.2	0.0146
M10198_2.00:EGR1:EGR2:EGR3:EGR4	HGTGGGHGGG	0.0001	-11.45	0.0001	3846	0.226	6163.3	0.2125
M04199_2.00:BHLHE22:BHLHE23	AMCATATGKT	0.0001	-11.42	0.0001	425	0.025	586.5	0.0202
M07900_2.00:CTCF	VBRGCGCCCCCTGGTGG	0.0001	-11.42	0.0001	53	0.0031	47.7	0.0016
M02883_2.00:EGR1:EGR2:EGR3:EGR4	HMCGCCCACGCAHW	0.0001	-11.41	0.0001	34	0.002	25.6	0.0009
M07891_2.00:CTCF	RGCGCCCCCTGGTGGCCR	0.0001	-11.41	0.0001	34	0.002	25.9	0.0009
M03122_2.00:ALX1:ALX3:ALX4:ARX:BARX1:BARX2:BSX:DLX2:DLX3:DRGX:EMX1:EMX2:EN1:EN2:ESX1:EVX1:EVX2:GBX1:GBX2:GSX1:GSX2:HESX1:HOXA2:HOXA3:HOXB2:HOXB3:HOXD3:ISX:LBX1:LBX2:LHX1:LHX2:LHX3:LHX4:LHX5:LHX6:LHX8:LHX9:LMX1A:LMX1B:MEOX1:MIXL1:MNX1:MSX1:MSX2:NKX1-1:NKX1-2:NOBOX:NOTO:OTP:PDX1:PHOX2A:PHOX2B:PROP1:PRRX1:PRRX2:RAX:RAX2:SEBOX:SHOX:SHOX2:UNCX:VAX1:VAX2:VSX1:VSX2:ZFHX2	TAATTARATTA	0.0001	-11.35	0.0001	690	0.0405	999	0.0345
M02463_2.00:GMEB1:GMEB2	BBACGYH	0.0001	-11.27	0.0001	8197	0.4817	13499.2	0.4655
M10674_2.00:ALX1:ALX3:ALX4:ARX:BARHL1:BARHL2:BARX1:BARX2:BSX:DLX1:DLX2:DLX3:DLX4:DLX5:DLX6:DRGX:EMX1:EMX2:EN1:EN2:GBX1:GBX2:GSX1:GSX2:HMX1:HMX3:HOXA1:HOXA2:HOXA3:HOXB1:HOXB2:HOXB3:HOXD1:HOXD3:ISX:LHX1:LHX5:MEOX1:MEOX2:MNX1:MSX1:MSX2:NANOG:NANOGP8:NKX1-1:NKX1-2:PDX1:PHOX2A:PHOX2B:PROP1:PRRX1:PRRX2:SHOX:SHOX2:UNCX:VAX1:VAX2:VSX1:VSX2	AMGCCTGACKG	0.0001	-11.14	0.0001	711	0.0418	1034.1	0.0357
M05690_2.00:PAX1:PAX2:PAX3:PAX5:PAX6:PAX7:PAX8:PAX9	BCRNTCAWGCGTGACSN	0.0001	-11.14	0.0001	20	0.0012	11.3	0.0004
M10137_2.00:PATZ1	DGGGGGGGGGCCA	0.0001	-11.13	0.0001	355	0.0209	481.6	0.0166
M07863_2.00:CTCF	YRGCGCCCCCTGGTGG	0.0001	-11.12	0.0001	55	0.0032	50	0.0017
M10518_2.00:ELF1:ELF2:ELF4:ELK1:ELK3:ELK4:ERF:ERG:ETS1:ETS2:ETV1:ETV2:ETV3:ETV3L:ETV4:ETV5:FEV:FLI1:GABPA	ACWTCCT	0.0001	-11.05	0.0001	7836	0.4605	12891.6	0.4446
M03468_2.00:RUNX1:RUNX2:RUNX3	WAACCGCAAACCGCAR	0.0001	-11.04	0.0001	10	0.0006	3.6	0.0001
M10269_2.00:ZBTB33	TCTCGCGAG	0.0001	-11.04	0.0001	10	0.0006	4	0.0001
M05409_2.00:HOXA3:HOXA4:HOXA5:HOXA6:HOXA7:HOXB3:HOXB4:HOXB5:HOXB6:HOXB7:HOXB8:HOXC4:HOXC5:HOXC6:HOXC8:HOXD3:HOXD4:HOXD8:PDX1	TTAACGAC	0.0001	-10.96	0.0001	2601	0.1528	4107	0.1416
M09621_2.00:TP53	NRRRCATGYCYRGRCATGYY	0.0001	-10.95	0.0001	49	0.0029	43	0.0015
M03829_2.00:ARX:BARHL1:BARHL2:BARX1:BARX2:BSX:DLX1:DLX2:DLX3:DLX4:DLX5:DLX6:DRGX:EMX1:EMX2:ESX1:EVX1:EVX2:GBX1:GBX2:HMX1:HMX2:HMX3:HOXA2:HOXB2:LBX1:LBX2:MEOX1:MEOX2:MNX1:MSX1:MSX2:NANOG:NANOGP8:NKX1-1:NKX1-2:PDX1:RAX:RAX2:TLX1:TLX2:TLX3:UNCX:VAX1:VAX2:VSX1:VSX2	SSTAAACGNT	0.0001	-10.95	0.0001	2590	0.1522	4089.5	0.141
M08863_2.00:MZF1	YCMAWTCCCCTYY	0.0001	-10.94	0.0001	2496	0.1467	3934.5	0.1357
M09554_2.00:GATA1:GATA2:GATA3:GATA4:GATA5:GATA6	NAGATWNBNATCTNN	0.0001	-10.9	0.0001	490	0.0288	690.8	0.0238
M04166_2.00:ATOH1	AACAGCTGTC	0.0001	-10.84	0.0001	509	0.0299	720.2	0.0248
M03306_2.00:POU2F3	TATGCAAAT	0.0001	-10.83	0.0001	2143	0.1259	3355.3	0.1157
M08885_2.00:CTCFL	BRGCGCCCCCTGSYGGC	0.0001	-10.82	0.0001	36	0.0021	28.2	0.001
M02665_2.00:RREB1	CCCCAAACCACCCCCMMCCM	0.0001	-10.77	0.0001	81	0.0048	84.8	0.0029
M07928_2.00:EGR1:EGR2:EGR3:EGR4	CYCCGCCCCCGCVCC	0.0001	-10.77	0.0001	81	0.0048	84.6	0.0029
M03250_2.00:CRX:DMBX1:DPRX:GSC:GSC2:OTX1:OTX2:PITX1:PITX2:PITX3:TPRX1	HTAATCCB	0.0001	-10.77	0.0001	5520	0.3244	8982.4	0.3098
M02768_2.00:TFAP2A:TFAP2B:TFAP2C:TFAP2D:TFAP2E	TGCCYBRGGGCA	0.0001	-10.77	0.0001	398	0.0234	549.5	0.0189
M02733_2.00:EHF:ELF1:ELF2:ELF3:ELF4:ELF5:ETV6:ETV7:FEV	ACCCGGAAGT	0.0001	-10.74	0.0001	280	0.0165	370.6	0.0128
M03557_2.00:TBX2:TBX3:TBX4:TBX5	WAGGTGTGAAA	0.0001	-10.73	0.0001	1048	0.0616	1575	0.0543
M09510_2.00:ZNF143:ZNF76	ATTTCCCAGVAKSCY	0.0001	-10.72	0.0001	429	0.0252	597.8	0.0206
M04226_2.00:OLIG2:OLIG3	AMCATATGKT	0.0001	-10.71	0.0001	427	0.0251	594.2	0.0205
M07918_2.00:CTCF	GCGCCCCCTGGTGG	0.0001	-10.67	0.0001	67	0.0039	66.3	0.0023
M08901_2.00:ZNF18	CCAGTTCACACC	0.0001	-10.6	0.0001	612	0.036	883.2	0.0305
M02400_2.00:HNF4A:HNF4G:NR1H4:NR2C1:NR2C2:NR2F1:NR2F2:NR2F6:NR4A1:NR4A2:NR4A3:NR5A1:NR5A2:NR6A1:PPARA:PPARD:PPARG:RARA:RARB:RARG:RORA:RORB:RORC:RXRA:RXRB:RXRG:THRA:THRB	GGGGTCAH	0.0001	-10.57	0.0001	5340	0.3138	8684.3	0.2995
M02402_2.00:HNF4A:HNF4G:NR1H4:NR2C1:NR2C2:NR2F1:NR2F2:NR2F6:NR4A1:NR4A2:NR4A3:NR5A1:NR5A2:NR6A1:PPARA:PPARD:PPARG:RARA:RARB:RARG:RORA:RORB:RORC:RXRA:RXRB:RXRG:THRA	RRGGTCAH	0.0001	-10.57	0.0001	5340	0.3138	8684.3	0.2995
M09417_2.00:STAT5A:STAT5B	ATTTCYAAGAAA	0.0001	-10.57	0.0001	1207	0.0709	1833.8	0.0632
M09421_2.00:STAT5A:STAT5B	ATTTCYAAGAAA	0.0001	-10.57	0.0001	1207	0.0709	1833.8	0.0632
M10780_2.00:HOXA10:HOXA11:HOXA6:HOXA9:HOXB6:HOXB8:HOXB9:HOXC10:HOXC11:HOXC12:HOXC5:HOXC6:HOXC8:HOXC9:HOXD10:HOXD11:HOXD12:HOXD8:HOXD9	CATAAAA	0.0001	-10.54	0.0001	6991	0.4108	11471.7	0.3956
M09239_2.00:IRF9	GAAAGCGAAACT	0.0001	-10.48	0.0001	255	0.015	334.2	0.0115
M09240_2.00:IRF9	GAAAGCGAAACT	0.0001	-10.48	0.0001	255	0.015	334.2	0.0115
M04295_2.00:CREB3L2:CREB3L4	CGCCACGTGGCM	0.0001	-10.43	0.0001	156	0.0092	189.1	0.0065
M07602_2.00:ZNF18	RGTGTGAACHGGNGB	0.0001	-10.43	0.0001	555	0.0326	795.4	0.0274
M05044_2.00:NKX2-1:NKX2-2:NKX2-3:NKX2-4:NKX2-5:NKX2-6:NKX2-8	CTCAACGAC	0.0001	-10.41	0.0001	682	0.0401	995.5	0.0343
M04300_2.00:ATF2:CREB5	NATGACATCAYY	0.0001	-10.36	0.0001	415	0.0244	578.1	0.0199
M04110_2.00:BHLHE22:BHLHE23	ACCATATGGT	0.0001	-10.36	0.0001	863	0.0507	1283.7	0.0443
M04105_2.00:MYF5:MYF6:MYOD1:MYOG	BAACAGCTGTYV	0.0001	-10.33	0.0002	210	0.0123	268	0.0092
M09750_2.00:TFAP2A:TFAP2B:TFAP2C:TFAP2D:TFAP2E	GCBNVGGSCYGVGGGS	0.0001	-10.31	0.0002	489	0.0287	693.3	0.0239
M07678_2.00:ZNF529	YCYSSCYCYTCCTCCCSCTTCCCACCC	0.0001	-10.31	0.0002	16	0.0009	8.6	0.0003
M05000_2.00:HOXA10:HOXA4:HOXA5:HOXA6:HOXA7:HOXA9:HOXB4:HOXB5:HOXB6:HOXB7:HOXB8:HOXB9:HOXC10:HOXC4:HOXC5:HOXC6:HOXC8:HOXC9:HOXD10:HOXD4:HOXD8:HOXD9:MNX1:PDX1	WTAACGAC	0.0001	-10.3	0.0002	3151	0.1852	5030.2	0.1735
M09008_2.00:KLF1:KLF12:KLF2:KLF3:KLF4:KLF5:KLF6:KLF7	CCCRGCCMCRCCCH	0.0001	-10.29	0.0002	602	0.0354	870.7	0.03
M03334_2.00:IRF4:IRF8	YCGAAACCGAAACTA	0.0001	-10.28	0.0002	6	0.0004	0	0
M03442_2.00:PAX1:PAX2:PAX3:PAX5:PAX6:PAX7:PAX8:PAX9	KGCASTCATGCGTGACG	0.0001	-10.28	0.0002	6	0.0004	0.8	0
M04597_2.00:AC138696.1:ZFP41	NGCTAACTCTCCGCR	0.0001	-10.28	0.0002	6	0.0004	1.7	0.0001
M09337_2.00:TP53	RGRCATGYCCAGACATGYCC	0.0001	-10.28	0.0002	6	0.0004	1.7	0.0001
M09340_2.00:TP53	GGACATGCCCRGGCADGCCC	0.0001	-10.28	0.0002	6	0.0004	1.4	0
M00706_2.00:PAX2:PAX5:PAX6:PAX8	ACGCGTGACG	0.0001	-10.23	0.0002	170	0.01	210.1	0.0072
M10359_2.00:ZIC1:ZIC2:ZIC3:ZIC4:ZIC5	CCCGCTGGG	0.0001	-10.08	0.0002	1150	0.0676	1747	0.0602
M07908_2.00:CTCF	NVYRGCGCCCCCTGGTGGCCR	0.0001	-10.05	0.0002	18	0.0011	10.8	0.0004
M04260_2.00:ATF1:CREB1:CREM	RTGACRCGTCAY	0.0001	-10.04	0.0002	136	0.008	162.2	0.0056
M10217_2.00:KLF1:KLF12:KLF2:KLF3:KLF4:KLF5:KLF6:KLF7	GCCMCRCCCWBC	0.0001	-10.04	0.0002	1490	0.0876	2299.5	0.0793
M04584_2.00:EGR1:EGR2:EGR3:EGR4	HCCGCCCACGCAH	0.0001	-10.01	0.0002	25	0.0015	17.7	0.0006
M08810_2.00:MAF:MAFA:MAFB:MAFG:MAFK	TGCTGASTCAGCADWTTT	0.0001	-9.986	0.0002	19	0.0011	11.2	0.0004
M04053_2.00:TFAP2A:TFAP2B:TFAP2C:TFAP2D:TFAP2E	HGCCTBAGGGCA	0.0001	-9.95	0.0002	635	0.0373	925.1	0.0319
M07763_2.00:ZNF705G	AGAGGTTTCTT	0.0001	-9.93	0.0002	265	0.0156	352	0.0121
[truncated: 6,027 more rows]

## Sheet: EBNA2 open chromatin HOMER
Motif Name	Consensus	P-value	Log P-value	q-value (Benjamini)	# of Target Sequences with Motif(of 1543)	% of Target Sequences with Motif	# of Background Sequences with Motif(of 45062)	% of Background Sequences with Motif
[truncated: 7,704 more rows]

[truncated: 2 more sheets: EBNA2 closed chromatin HOMER, EBNA2 partner motif enrichment]
