# Supplementary material for: Epstein–Barr virus nuclear antigen 2 extensively rewires the human chromatin landscape at autoimmune risk loci
Source: Genome Res. 2021 Dec;31(12):2185–98. doi: 10.1101/gr.264705.120 (PMC8647835; doi:10.1101/gr.264705.120)
Supplement: Supplemental Material [file supp_gr.264705.120_Supplemental_Table_S14.xlsx]

## Sheet: README
Epstein-Barr virus nuclear antigen 2 (EBNA2) extensively rewires the human chromatin landscape at autoimmune risk loci
This document contains the MARIO (allelic) results for all autoimmune-associated genetic variants.
Comments, additions, or subtractions should be addressed to the corresponding authors:
Leah Kottyan (Leah.Kottyan@cchmc.org)
Matt Weirauch (Matthew.Weirauch@cchmc.org)
The columns in the 'EBNA2 Allelic binding' are:
CHR	Chromosome of allelic SNPs.
START	Starting position of allelic SNPs.
END	Ending position of allelic SNPs.
REF_BASE	Reference base of allelic SNPs.
S_BASE	Strong base of allelic SNPs.
W_BASE	Weak base of allelic SNPs.
S_READS	Number of reads for weak base of allelic SNPs.
W_READS	Number of reads for strong base of allelic SNPs.
WS_RATIO	Ratio between weak and strong allele.
SNP_STATUS	SNP status whether imputed (i) or genotyped (g).
ARS_GLOBAL	Allelic Reproducibility Score (ARS)
DIS_SNP_ID	SNP ID.
DISEASE	Name of the disease.
AUTOIMMUNE	Disease status whether autoinflammatory (1) or not (0).
AUTOINFLAMMATORY	Disease status whether autoimmune (1) or not (0).
GENE	Name of gene loci where SNPs are.
CELL	Cell type.

## Sheet: EBNA2 Allelic binding
CHR	START	END	REF_BASE	S_BASE	W_BASE	S_READS	W_READS	WS_RATIO	SNP_STATUS	ARS_GLOBAL	DIS_SNP_ID	DISEASE	AUTOIMMUNE	AUTOINFLAMMATORY	GENE	CELL
chr13	99881581	99881582	A	C,C	A,A	25,27	8,12	0.32,0.444444444444444	i	0.745	rs9513585	Behcets_disease-EU	1	1	UBAC2	Ramos
chr13	100018591	100018592	G	A,A	G,G	10,12	2,2	0.2,0.166666666666667	i	0.739	rs1923895	Behcets_disease-EU	1	1	UBAC2	Ramos
chr16	11403892	11403893	C	C,C	T,T	9,8	2,3	0.222222222222222,0.375	i	0.68	rs12928822	Celiac_disease-EU,Inflammatory_bowel_disease-EU,Juvenile_idiopathic_arthritis-EU,Multiple_sclerosis-EU	1	1	PRM1	GM12878
chr6	32590410	32590411	G	G,G	N,N	6,6	0,0	0,0	i	0.675	rs9271562	Systemic_sclerosis-EU	1	0	HLA-DQA1	GM12878
chr11	35294185	35294186	A	G,G	A,A	8,6	1,2	0.125,0.333333333333333	i	0.67	rs3794102	Vitiligo-EU	1	0	SLC1A2	Ramos
chr1	2487765	2487766	T	C,C	T,T	6,8	2,2	0.333333333333333,0.25	i	0.655	rs2227313	Ulcerative_colitis-EU	1	0	TNFRSF14	GM12878
chr3	119280891	119280892	A	A,A	N,N	5,5	0,0	0,0	i	0.643	rs762629	Vitiligo-EU	1	0	CD80	GM12878
chr4	40308367	40308368	T	C,C	T,T	6,6	1,2	0.166666666666667,0.333333333333333	i	0.641	rs7691190	Graves_disease-AS	1	0	LOC101060498	GM12878
chr1	206941863	206941864	A	A,A	G,G	6,5	1,1	0.166666666666667,0.2	i	0.64	rs3024496	Systemic_lupus_erythematosus-AS,Systemic_lupus_erythematosus-EU+AA+AS+HA	1	0	IL10	GM12878
chr8	56904243	56904244	A	A,A	G,G	5,5	1,1	0.2,0.2	i	0.621	rs2667977	Systemic_lupus_erythematosus-AS,Systemic_lupus_erythematosus-EU+AA+AS+HA	1	0	LYN	GM12878
chr13	100018974	100018975	C	T,T	C,C	2,9	1,2	0.5,0.222222222222222	i	0.588	rs7998034	Inflammatory_bowel_disease-EU	1	0	UBAC2	Ramos
chr21	43835826	43835827	A	A,A	G,G	7,5	3,2	0.428571428571429,0.4	i	0.576	rs7278547	Type_1_diabetes-EU	1	0	UBASH3A	GM12878
chr6	32578081	32578082	C	T,T	C,C	4,4	1,1	0.25,0.25	i	0.57	rs674313	Chronic_lymphocytic_leukemia-EU,Systemic_sclerosis-EU	1	0	HLA-DRB1	GM12878
chr11	1874071	1874072	G	A,A	G,G	4,4	1,1	0.25,0.25	i	0.57	rs907611	Bladder_cancer-EU,Inflammatory_bowel_disease-EU,Ulcerative_colitis-EU	1	0	LSP1	GM12878
chr3	119281635	119281636	G	C,C	G,G	7,6	3,3	0.428571428571429,0.5	i	0.561	rs867234	Vitiligo-EU	1	0	CD80	GM12878
chr17	37912376	37912377	C	T,T	C,C	6,7	3,3	0.5,0.428571428571429	i	0.561	rs12946510	Asthma-EU,Crohns_disease-EU,Inflammatory_bowel_disease-EU,Multiple_sclerosis-EU,Primary_biliary_cirrhosis-AS,Rheumatoid_arthritis-EU,Ulcerative_colitis-EU	1	1	IKZF3	GM12878
chr16	23853859	23853860	G	A,A	G,G	12,12	8,6	0.666666666666667,0.5	i	0.534	rs7200798	Inflammatory_bowel_disease-EU	1	0	PRKCB	GM12878
chr2	213880275	213880276	A	A,A	G,G	11,10	6,6	0.545454545454545,0.6	i	0.531	rs996032	Systemic_lupus_erythematosus-AS	1	0	IKZF2	GM12878
chr13	100027956	100027957	A	A	N	11	0	0	i	0.523	rs8181880	Inflammatory_bowel_disease-EU	1	0	UBAC2	Ramos
chr6	32590481	32590482	C	G,G	C,C	4,5	2,2	0.5,0.4	i	0.509	rs2395224	Chronic_lymphocytic_leukemia-EU,Systemic_sclerosis-EU	1	0	HLA-DQA1	GM12878
chr15	67442595	67442596	C	C,C	T,T	4,5	2,2	0.5,0.4	i	0.509	rs17293632	Inflammatory_bowel_disease-EU,Self-reported_allergy-EU	1	0	SMAD3	GM12878
chr8	128196359	128196360	A	A,A	G,G	7,7	4,4	0.571428571428571,0.571428571428571	i	0.482	rs2456450	Chronic_lymphocytic_leukemia-EU,Multiple_sclerosis-EU	1	0	CASC19	GM12878
chr12	129302866	129302867	A	T,T	A,A	9,12	4,10	0.444444444444444,0.833333333333333	i	0.466	rs12321643	Systemic_lupus_erythematosus-EU,Systemic_lupus_erythematosus-EU+AA+AS+HA	1	0	SLC15A4	Ramos
chr10	81046264	81046265	T	T,T	C,C	2,6	1,3	0.5,0.5	i	0.462	rs1250567	Multiple_sclerosis-EU	1	0	ZMIZ1	Ramos
chr21	43836082	43836083	A	A,A	G,G	4,4	2,2	0.5,0.5	i	0.462	rs9976479	Type_1_diabetes-EU	1	0	UBASH3A	GM12878
chr8	128196626	128196627	G	G,G	A,A	11,13	8,8	0.727272727272727,0.615384615384615	i	0.448	rs2456451	Chronic_lymphocytic_leukemia-EU,Multiple_sclerosis-EU	1	0	CASC19	GM12878
chr3	119281589	119281590	C	A,A	C,C	11,8	5,7	0.454545454545455,0.875	i	0.432	rs885654	Vitiligo-EU	1	0	CD80	GM12878
chr2	213880843	213880844	C	C,C	T,T	19,21	14,15	0.736842105263158,0.714285714285714	i	0.43	rs34613499	Systemic_lupus_erythematosus-AS,Systemic_lupus_erythematosus-EU+AA+AS+HA	1	0	IKZF2	GM12878
chr2	68598902	68598903	C	T,T	C,C	6,7	5,3	0.833333333333333,0.428571428571429	i	0.419	rs17035375	Celiac_disease-EU,Multiple_sclerosis-EU	1	0	PLEK	GM12878
chr14	107181151	107181152	A	A,A	G,G	7,11	7,4	1,0.363636363636364	i	0.411	rs17114171	Kawasaki_disease-EU	1	1	MIR5195	Ramos
chr4	40307563	40307564	C	C,C	T,T	25,25	20,18	0.8,0.72	i	0.405	rs13136820	Graves_disease-AS	1	0	LOC101060498	GM12878
chr2	68598954	68598955	T	C,C	T,T	8,7	5,5	0.625,0.714285714285714	i	0.403	rs17035378	Celiac_disease-EU,Multiple_sclerosis-EU	1	0	PLEK	GM12878
