# Supplementary material for: Epstein–Barr virus nuclear antigen 2 extensively rewires the human chromatin landscape at autoimmune risk loci
Source: Genome Res. 2021 Dec;31(12):2185–98. doi: 10.1101/gr.264705.120 (PMC8647835; doi:10.1101/gr.264705.120)
Supplement: Supplemental Material [file supp_gr.264705.120_Supplemental_Table_S16.xlsx]

## Sheet: README
Epstein-Barr virus nuclear antigen 2 (EBNA2) extensively rewires the human chromatin landscape at autoimmune risk loci
This document contains the results of intersection analysis of the disease variants with EBNA2 dependent datatypes in this study
Comments, additions, or subtractions should be addressed to the corresponding authors:
Leah Kottyan (Leah.Kottyan@cchmc.org)
Matt Weirauch (Matthew.Weirauch@cchmc.org)
We used all variants in GWAS catalog (version 1.0.2) that are genome wide significant ( p-value of 5E-8 or smaller) and their LD blocks to intesect (using bedtools intersect) with the different data types.
GWAS intersect EBNA2 regions
CHR	Chromosome of the SNP
START	SNP position
END	SNP position
RSID	SNP RsID
PHENOTYPE_ANCESTRY	The disease/traits the SNP is associated with and the ancestry of the population studied
AUTOIMMUNE	Whether the disease is an autoimmune disease
AUTOINFLAMMATORY	Whether the disease is an autoinflammatory disease
IMMUNE	Whether the disease is an immune disease
ALLERGIC	Whether the disease is an allergic disease
IBD	Whether the disease is an Irritable Bowel Syndrome or related disease
DATA SET NAME	EBNA2 dependent data type from this study
CHR	chromosome postion of the peak/gene/loop
START	start position
END	end postion
PEAK/LOOP/GENE	the loop/peak/gene number
Pairwise intersections
This tab indicates the 18 autoimmune genetic variants that impact multiple EBNA2-dependent mechanisms (e.g., EBNA2-dependent chromatin opening combined with EBNA2-dependent elevated gene expression).
Summary
This tab shows the summary of the number of SNPs overlapping with each EBNA2 dependentant data type presentted in this study

## Sheet: GWAS intersect EBNA2 regions
CHR	START	END	RSID	PHENOTYPE_ANCESTRY	AUTOIMMUNE	AUTOINFLAMMATORY	IMMUNE	ALLERGIC	IBD	DATA SET NAME	CHR	START	END	PEAK/LOOP/GENE
chr1	1796717	1796717	rs12134553	Insomnia_symptoms__never_rarely_vs__usually_EUR	0	0	0	0	0	EBNA2_gain_loop	chr1	1793456	1798169	loop_7
chr1	1797947	1797947	rs9660106	Diastolic_blood_pressure_AMR,Systolic_blood_pressure_AMR,Blood_protein_levels_EUR,Diastolic_blood_pressure_EUR,Systolic_blood_pressure_EUR	0	0	0	0	0	EBNA2_gain_loop	chr1	1793456	1798169	loop_7
chr1	1831012	1831012	rs7542410	Diastolic_blood_pressure_AMR,Systolic_blood_pressure_AMR,Blood_protein_levels_EUR,Body_mass_index_EUR,Diastolic_blood_pressure_EUR,Systolic_blood_pressure_EUR	0	0	0	0	0	EBNA2_gain_loop	chr1	1830551	1833838	loop_7
chr1	1832701	1832701	rs4648730	Diastolic_blood_pressure_AMR,Systolic_blood_pressure_AMR,Blood_protein_levels_EUR,Body_mass_index_EUR,Diastolic_blood_pressure_EUR,Systolic_blood_pressure_EUR	0	0	0	0	0	EBNA2_gain_loop	chr1	1830551	1833838	loop_7
chr1	1832825	1832825	rs7548509	Diastolic_blood_pressure_AMR,Systolic_blood_pressure_AMR,Blood_protein_levels_EUR,Body_mass_index_EUR,Diastolic_blood_pressure_EUR,Systolic_blood_pressure_EUR	0	0	0	0	0	EBNA2_gain_loop	chr1	1830551	1833838	loop_7
chr1	1833757	1833757	rs70940704	Blood_protein_levels_EUR,Diastolic_blood_pressure_EUR	0	0	0	0	0	EBNA2_gain_loop	chr1	1830551	1833838	loop_7
chr1	2477358	2477358	rs12097268	Chronic_inflammatory_diseases__ankylosing_spondylitis__Crohn_s_disease__psoriasis__primary_sclerosing_cholangitis__ulcerative_colitis___pleiotropy_EUR,Ulcerative_colitis_EUR	1	1	1	0	1	EBNA2_gain_loop	chr1	2476096	2481428	loop_8
chr1	2478511	2478511	rs2477678	Chronic_inflammatory_diseases__ankylosing_spondylitis__Crohn_s_disease__psoriasis__primary_sclerosing_cholangitis__ulcerative_colitis___pleiotropy_EUR,Ulcerative_colitis_EUR	1	1	1	0	1	EBNA2_gain_loop	chr1	2476096	2481428	loop_8
chr1	2479983	2479983	rs1974044	Chronic_inflammatory_diseases__ankylosing_spondylitis__Crohn_s_disease__psoriasis__primary_sclerosing_cholangitis__ulcerative_colitis___pleiotropy_EUR,Ulcerative_colitis_EUR	1	1	1	0	1	EBNA2_gain_loop	chr1	2476096	2481428	loop_8
chr1	2487663	2487663	rs2227312	Chronic_inflammatory_diseases__ankylosing_spondylitis__Crohn_s_disease__psoriasis__primary_sclerosing_cholangitis__ulcerative_colitis___pleiotropy_EUR,Ulcerative_colitis_EUR	1	1	1	0	1	EBNA2_gain_loop	chr1	2485419	2491852	loop_8
chr1	2487766	2487766	rs2227313	Chronic_inflammatory_diseases__ankylosing_spondylitis__Crohn_s_disease__psoriasis__primary_sclerosing_cholangitis__ulcerative_colitis___pleiotropy_EUR,Ulcerative_colitis_EUR	1	1	1	0	1	EBNA2_allelic	chr1	2487765	2487766	rs2227313
chr1	2487766	2487766	rs2227313	Chronic_inflammatory_diseases__ankylosing_spondylitis__Crohn_s_disease__psoriasis__primary_sclerosing_cholangitis__ulcerative_colitis___pleiotropy_EUR,Ulcerative_colitis_EUR	1	1	1	0	1	EBNA2_gain_loop	chr1	2485419	2491852	loop_8
chr1	2488153	2488153	rs4870	Chronic_inflammatory_diseases__ankylosing_spondylitis__Crohn_s_disease__psoriasis__primary_sclerosing_cholangitis__ulcerative_colitis___pleiotropy_EUR,Ulcerative_colitis_EUR	1	1	1	0	1	EBNA2_gain_loop	chr1	2485419	2491852	loop_8
chr1	2488608	2488608	rs1886730	Chronic_inflammatory_diseases__ankylosing_spondylitis__Crohn_s_disease__psoriasis__primary_sclerosing_cholangitis__ulcerative_colitis___pleiotropy_EUR,Ulcerative_colitis_EUR	1	1	1	0	1	EBNA2_gain_loop	chr1	2485419	2491852	loop_8
chr1	2488930	2488930	rs2495366	Chronic_inflammatory_diseases__ankylosing_spondylitis__Crohn_s_disease__psoriasis__primary_sclerosing_cholangitis__ulcerative_colitis___pleiotropy_EUR,Ulcerative_colitis_EUR	1	1	1	0	1	EBNA2_gain_loop	chr1	2485419	2491852	loop_8
chr1	2490898	2490898	rs2257763	Chronic_inflammatory_diseases__ankylosing_spondylitis__Crohn_s_disease__psoriasis__primary_sclerosing_cholangitis__ulcerative_colitis___pleiotropy_EUR,Ulcerative_colitis_EUR	1	1	1	0	1	EBNA2_gain_loop	chr1	2485419	2491852	loop_8
chr1	2490942	2490942	rs2281852	Chronic_inflammatory_diseases__ankylosing_spondylitis__Crohn_s_disease__psoriasis__primary_sclerosing_cholangitis__ulcerative_colitis___pleiotropy_EUR,Ulcerative_colitis_EUR	1	1	1	0	1	EBNA2_gain_loop	chr1	2485419	2491852	loop_8
chr1	2491205	2491205	rs2234161	Chronic_inflammatory_diseases__ankylosing_spondylitis__Crohn_s_disease__psoriasis__primary_sclerosing_cholangitis__ulcerative_colitis___pleiotropy_EUR,Ulcerative_colitis_EUR	1	1	1	0	1	EBNA2_gain_loop	chr1	2485419	2491852	loop_8
chr1	2510755	2510755	rs10910095	Allergic_disease__asthma__hay_fever_or_eczema_EUR	0	0	1	1	0	EBNA2_loss_loop	chr1	2507996	2510952	loop_1
chr1	6296011	6296011	chr1_6296011	Resting_heart_rate_EUR	0	0	0	0	0	EBNA2_up_genes	chr1	6295799	6296799	LINC00337
chr1	6296238	6296238	rs9970334	Resting_heart_rate_EUR	0	0	0	0	0	EBNA2_up_genes	chr1	6295799	6296799	LINC00337
chr1	8591162	8591162	rs12131864	Smoking_initiation_EAS,Depressive_symptoms_EUR,Feeling_tense_EUR,Life_satisfaction_EUR,Neuroticism_EUR,Positive_affect_EUR,Smoking_initiation_EUR	0	0	0	0	0	EBNA2_gain_loop	chr1	8588985	8594769	loop_17
chr1	8591397	8591397	rs61783642	Smoking_initiation_EAS,Depressive_symptoms_EUR,Feeling_tense_EUR,Life_satisfaction_EUR,Neuroticism_EUR,Positive_affect_EUR,Smoking_initiation_EUR	0	0	0	0	0	EBNA2_gain_loop	chr1	8588985	8594769	loop_17
chr1	8593243	8593243	rs111327933	Neuroticism__MTAG_EUR,Subjective_well_being__MTAG_EUR,White_blood_cell_count_EUR	0	0	1	0	0	EBNA2_gain_loop	chr1	8588985	8594769	loop_17
chr1	8702753	8702753	rs6577513	Smoking_initiation_EAS,Depressive_symptoms_EUR,Feeling_tense_EUR,Life_satisfaction_EUR,Neuroticism_EUR,Positive_affect_EUR,Smoking_initiation_EUR	0	0	0	0	0	EBNA2_gain_loop	chr1	8702050	8705760	loop_18
chr1	8704059	8704059	rs2401138	Smoking_initiation_EAS,Depressive_symptoms_EUR,Feeling_tense_EUR,Life_satisfaction_EUR,Neuroticism_EUR,Positive_affect_EUR,Smoking_initiation_EUR	0	0	0	0	0	EBNA2_gain_loop	chr1	8702050	8705760	loop_18
chr1	8705037	8705037	rs1463053	Smoking_initiation_EAS,Depressive_symptoms_EUR,Feeling_tense_EUR,Life_satisfaction_EUR,Neuroticism_EUR,Positive_affect_EUR,Smoking_initiation_EUR	0	0	0	0	0	EBNA2_gain_loop	chr1	8702050	8705760	loop_18
chr1	8878481	8878481	rs1826583	Heel_bone_mineral_density_EUR	0	0	0	0	0	EBNA2_gain_loop	chr1	8876111	8879195	loop_20
chr1	11864378	11864378	rs3753585	Diastolic_blood_pressure_EAS,Diastolic_blood_pressure__cigarette_smoking_interaction_EAS,Diastolic_blood_pressure_x_alcohol_consumption__light_vs_heavy__interaction__2df_test_EAS,Diastolic_blood_pressure_x_alcohol_consumption_interaction__2df_test_EAS,Mean_arterial_pressure_x_alcohol_consumption__light_vs_heavy__interaction__2df_test_EAS,Mean_arterial_pressure_x_alcohol_consumption_interaction__2…	0	0	0	0	0	EBNA2_gain_loop	chr1	11864280	11868388	loop_33
chr1	11864586	11864586	rs3753584	Diastolic_blood_pressure_AFR,Diastolic_blood_pressure__cigarette_smoking_interaction_AFR,Diastolic_blood_pressure_x_alcohol_consumption__light_vs_heavy__interaction__2df_test_AFR,Mean_arterial_pressure_AFR,Pulse_pressure_AFR,Systolic_blood_pressure__cigarette_smoking_interaction_AFR,Diastolic_blood_pressure_AMR,Diastolic_blood_pressure__cigarette_smoking_interaction_AMR,Diastolic_blood_pressure_x…	0	0	0	0	0	EBNA2_gain_loop	chr1	11864280	11868388	loop_33
chr1	11865063	11865063	rs3834045	Diastolic_blood_pressure_x_alcohol_consumption_interaction__2df_test_AFR,Systolic_blood_pressure_AFR,Diastolic_blood_pressure_AMR,Diastolic_blood_pressure__cigarette_smoking_interaction_AMR,Diastolic_blood_pressure_x_alcohol_consumption__light_vs_heavy__interaction__2df_test_AMR,Mean_arterial_pressure_AMR,Pulse_pressure_AMR,Systolic_blood_pressure__cigarette_smoking_interaction_AMR,Diastolic_bloo…	0	0	0	0	0	EBNA2_gain_loop	chr1	11864280	11868388	loop_33
chr1	11865236	11865236	rs17367629	Diastolic_blood_pressure_x_alcohol_consumption_interaction__2df_test_AFR,Systolic_blood_pressure_AFR,Diastolic_blood_pressure_AMR,Diastolic_blood_pressure__cigarette_smoking_interaction_AMR,Diastolic_blood_pressure_x_alcohol_consumption__light_vs_heavy__interaction__2df_test_AMR,Mean_arterial_pressure_AMR,Pulse_pressure_AMR,Systolic_blood_pressure__cigarette_smoking_interaction_AMR,Diastolic_bloo…	0	0	0	0	0	EBNA2_gain_loop	chr1	11864280	11868388	loop_33
chr1	11865284	11865284	rs3834044	Diastolic_blood_pressure_EAS,Diastolic_blood_pressure__cigarette_smoking_interaction_EAS,Diastolic_blood_pressure_x_alcohol_consumption__light_vs_heavy__interaction__2df_test_EAS,Diastolic_blood_pressure_x_alcohol_consumption_interaction__2df_test_EAS,Mean_arterial_pressure_x_alcohol_consumption__light_vs_heavy__interaction__2df_test_EAS,Mean_arterial_pressure_x_alcohol_consumption_interaction__2…	0	0	0	0	0	EBNA2_gain_loop	chr1	11864280	11868388	loop_33
chr1	11865542	11865542	rs3753582	Diastolic_blood_pressure_x_alcohol_consumption_interaction__2df_test_AFR,Mean_arterial_pressure_x_alcohol_consumption_interaction__2df_test_AFR,Systolic_blood_pressure_AFR,Diastolic_blood_pressure_AMR,Diastolic_blood_pressure__cigarette_smoking_interaction_AMR,Diastolic_blood_pressure_x_alcohol_consumption__light_vs_heavy__interaction__2df_test_AMR,Mean_arterial_pressure_AMR,Pulse_pressure_AMR,Sy…	0	0	0	0	0	EBNA2_gain_loop	chr1	11864280	11868388	loop_33
chr1	11865804	11865804	rs13306561	Diastolic_blood_pressure_AMR,Diastolic_blood_pressure__cigarette_smoking_interaction_AMR,Diastolic_blood_pressure_x_alcohol_consumption__light_vs_heavy__interaction__2df_test_AMR,Diastolic_blood_pressure_x_alcohol_consumption_interaction__2df_test_AMR,Mean_arterial_pressure_AMR,Mean_arterial_pressure_x_alcohol_consumption__light_vs_heavy__interaction__2df_test_AMR,Mean_arterial_pressure_x_alcohol…	0	0	0	0	0	EBNA2_gain_loop	chr1	11864280	11868388	loop_33
chr1	11865816	11865816	rs3834043	Diastolic_blood_pressure_x_alcohol_consumption_interaction__2df_test_AFR,Systolic_blood_pressure_AFR,Diastolic_blood_pressure_AMR,Diastolic_blood_pressure__cigarette_smoking_interaction_AMR,Diastolic_blood_pressure_x_alcohol_consumption__light_vs_heavy__interaction__2df_test_AMR,Mean_arterial_pressure_AMR,Pulse_pressure_AMR,Systolic_blood_pressure__cigarette_smoking_interaction_AMR,Diastolic_bloo…	0	0	0	0	0	EBNA2_gain_loop	chr1	11864280	11868388	loop_33
chr1	11865817	11865817	rs45594036	Diastolic_blood_pressure_x_smoking_status__current_vs_non_current__interaction__2df_test_AMR,Diastolic_blood_pressure_x_smoking_status__ever_vs_never__interaction__2df_test_AMR,Systolic_blood_pressure_x_smoking_status__current_vs_non_current__interaction__2df_test_AMR,Systolic_blood_pressure_x_smoking_status__ever_vs_never__interaction__2df_test_AMR,Diastolic_blood_pressure_x_smoking_status__curr…	0	0	0	0	0	EBNA2_gain_loop	chr1	11864280	11868388	loop_33
chr1	11866183	11866183	rs13306560	Diastolic_blood_pressure_x_smoking_status__current_vs_non_current__interaction__2df_test_AMR,Diastolic_blood_pressure_x_smoking_status__ever_vs_never__interaction__2df_test_AMR,Systolic_blood_pressure_x_smoking_status__current_vs_non_current__interaction__2df_test_AMR,Systolic_blood_pressure_x_smoking_status__ever_vs_never__interaction__2df_test_AMR,Diastolic_blood_pressure_x_smoking_status__curr…	0	0	0	0	0	EBNA2_gain_loop	chr1	11864280	11868388	loop_33
chr1	11866442	11866442	rs111334345	Diastolic_blood_pressure_x_alcohol_consumption_interaction__2df_test_AFR,Systolic_blood_pressure_x_alcohol_consumption_interaction__2df_test_AFR	0	0	0	0	0	EBNA2_gain_loop	chr1	11864280	11868388	loop_33
chr1	11866451	11866451	rs3737965	Diastolic_blood_pressure_EAS,Diastolic_blood_pressure__cigarette_smoking_interaction_EAS,Diastolic_blood_pressure_x_alcohol_consumption__light_vs_heavy__interaction__2df_test_EAS,Diastolic_blood_pressure_x_alcohol_consumption_interaction__2df_test_EAS,Mean_arterial_pressure_x_alcohol_consumption__light_vs_heavy__interaction__2df_test_EAS,Mean_arterial_pressure_x_alcohol_consumption_interaction__2…	0	0	0	0	0	EBNA2_gain_loop	chr1	11864280	11868388	loop_33
chr1	11867652	11867652	rs111776518	Diastolic_blood_pressure_x_alcohol_consumption_interaction__2df_test_AFR,Systolic_blood_pressure_x_alcohol_consumption_interaction__2df_test_AFR	0	0	0	0	0	EBNA2_gain_loop	chr1	11864280	11868388	loop_33
chr1	11867737	11867737	rs56221660	Diastolic_blood_pressure_x_alcohol_consumption_interaction__2df_test_AFR,Mean_arterial_pressure_x_alcohol_consumption_interaction__2df_test_AFR,Systolic_blood_pressure_AFR,Diastolic_blood_pressure_AMR,Diastolic_blood_pressure__cigarette_smoking_interaction_AMR,Diastolic_blood_pressure_x_alcohol_consumption__light_vs_heavy__interaction__2df_test_AMR,Diastolic_blood_pressure_x_alcohol_consumption_i…	0	0	0	0	0	EBNA2_gain_loop	chr1	11864280	11868388	loop_33
chr1	11867878	11867878	rs76351797	Diastolic_blood_pressure_x_alcohol_consumption_interaction__2df_test_AFR,Systolic_blood_pressure_x_alcohol_consumption_interaction__2df_test_AFR	0	0	0	0	0	EBNA2_gain_loop	chr1	11864280	11868388	loop_33
chr1	11868250	11868250	rs201659009	Diastolic_blood_pressure_x_alcohol_consumption_interaction__2df_test_AFR,Systolic_blood_pressure_x_alcohol_consumption_interaction__2df_test_AFR	0	0	0	0	0	EBNA2_gain_loop	chr1	11864280	11868388	loop_33
chr1	11868284	11868284	rs151161966	Moyamoya_disease_EAS	0	0	0	0	0	EBNA2_gain_loop	chr1	11864280	11868388	loop_33
chr1	11967190	11967190	rs34536155	Diastolic_blood_pressure_x_alcohol_consumption_interaction__2df_test_AFR,Systolic_blood_pressure_x_alcohol_consumption_interaction__2df_test_AFR,Diastolic_blood_pressure_x_alcohol_consumption_interaction__2df_test_EAS,Mean_arterial_pressure_x_alcohol_consumption_interaction__2df_test_EAS,Systolic_blood_pressure_x_alcohol_consumption_interaction__2df_test_EAS,Mean_arterial_pressure_x_alcohol_consu…	0	0	0	0	0	EBNA2_gain_loop	chr1	11967064	11970949	loop_33
chr1	11967301	11967301	rs36100953	Diastolic_blood_pressure_x_alcohol_consumption_interaction__2df_test_AFR,Systolic_blood_pressure_x_alcohol_consumption_interaction__2df_test_AFR,Mean_arterial_pressure_x_alcohol_consumption_interaction__2df_test_AMR,Diastolic_blood_pressure_x_alcohol_consumption_interaction__2df_test_EAS,Mean_arterial_pressure_x_alcohol_consumption_interaction__2df_test_EAS,Systolic_blood_pressure_x_alcohol_consu…	0	0	0	0	0	EBNA2_gain_loop	chr1	11967064	11970949	loop_33
chr1	11967355	11967355	rs35572017	Diastolic_blood_pressure_x_alcohol_consumption_interaction__2df_test_AFR,Systolic_blood_pressure_x_alcohol_consumption_interaction__2df_test_AFR,Mean_arterial_pressure_x_alcohol_consumption_interaction__2df_test_AMR,Diastolic_blood_pressure_x_alcohol_consumption_interaction__2df_test_EAS,Mean_arterial_pressure_x_alcohol_consumption_interaction__2df_test_EAS,Systolic_blood_pressure_x_alcohol_consu…	0	0	0	0	0	EBNA2_gain_loop	chr1	11967064	11970949	loop_33
chr1	11968160	11968160	rs34415017	Mean_arterial_pressure_x_alcohol_consumption_interaction__2df_test_EAS,Mean_arterial_pressure_x_alcohol_consumption_interaction__2df_test_EUR,Systolic_blood_pressure_x_alcohol_consumption_interaction__2df_test_EUR	0	0	0	0	0	EBNA2_gain_loop	chr1	11967064	11970949	loop_33
chr1	11968196	11968196	rs71647012	Diastolic_blood_pressure_x_alcohol_consumption_interaction__2df_test_AFR,Systolic_blood_pressure_x_alcohol_consumption_interaction__2df_test_AFR,Mean_arterial_pressure_x_alcohol_consumption_interaction__2df_test_AMR,Diastolic_blood_pressure_x_alcohol_consumption_interaction__2df_test_EAS,Mean_arterial_pressure_x_alcohol_consumption_interaction__2df_test_EAS,Systolic_blood_pressure_x_alcohol_consu…	0	0	0	0	0	EBNA2_gain_loop	chr1	11967064	11970949	loop_33
chr1	11968199	11968199	rs71647013	Mean_arterial_pressure_x_alcohol_consumption_interaction__2df_test_AFR,Mean_arterial_pressure_x_alcohol_consumption_interaction__2df_test_AMR,Diastolic_blood_pressure_x_alcohol_consumption_interaction__2df_test_EAS,Mean_arterial_pressure_x_alcohol_consumption_interaction__2df_test_EAS,Systolic_blood_pressure_x_alcohol_consumption_interaction__2df_test_EAS,Mean_arterial_pressure_x_alcohol_consumpt…	0	0	0	0	0	EBNA2_gain_loop	chr1	11967064	11970949	loop_33
chr1	11968205	11968205	rs71647014	Mean_arterial_pressure_x_alcohol_consumption_interaction__2df_test_AMR,Diastolic_blood_pressure_x_alcohol_consumption_interaction__2df_test_EAS,Mean_arterial_pressure_x_alcohol_consumption_interaction__2df_test_EAS,Systolic_blood_pressure_x_alcohol_consumption_interaction__2df_test_EAS,Mean_arterial_pressure_x_alcohol_consumption_interaction__2df_test_EUR,Systolic_blood_pressure_x_alcohol_consump…	0	0	0	0	0	EBNA2_gain_loop	chr1	11967064	11970949	loop_33
chr1	11968385	11968385	rs71647015	Mean_arterial_pressure_x_alcohol_consumption_interaction__2df_test_EUR,Systolic_blood_pressure_x_alcohol_consumption_interaction__2df_test_EUR	0	0	0	0	0	EBNA2_gain_loop	chr1	11967064	11970949	loop_33
chr1	11968414	11968414	rs117904167	Mean_arterial_pressure_x_alcohol_consumption_interaction__2df_test_EAS	0	0	0	0	0	EBNA2_gain_loop	chr1	11967064	11970949	loop_33
chr1	11968501	11968501	rs35399987	Diastolic_blood_pressure_x_alcohol_consumption_interaction__2df_test_AFR,Systolic_blood_pressure_x_alcohol_consumption_interaction__2df_test_AFR,Mean_arterial_pressure_x_alcohol_consumption_interaction__2df_test_AMR,Diastolic_blood_pressure_x_alcohol_consumption_interaction__2df_test_EAS,Mean_arterial_pressure_x_alcohol_consumption_interaction__2df_test_EAS,Systolic_blood_pressure_x_alcohol_consu…	0	0	0	0	0	EBNA2_gain_loop	chr1	11967064	11970949	loop_33
chr1	11969173	11969173	rs71647016	Diastolic_blood_pressure_x_alcohol_consumption_interaction__2df_test_AFR,Systolic_blood_pressure_x_alcohol_consumption_interaction__2df_test_AFR,Mean_arterial_pressure_x_alcohol_consumption_interaction__2df_test_AMR,Diastolic_blood_pressure_x_alcohol_consumption_interaction__2df_test_EAS,Mean_arterial_pressure_x_alcohol_consumption_interaction__2df_test_EAS,Systolic_blood_pressure_x_alcohol_consu…	0	0	0	0	0	EBNA2_gain_loop	chr1	11967064	11970949	loop_33
chr1	11969786	11969786	rs926270	Blood_protein_levels_EUR	0	0	0	0	0	EBNA2_gain_loop	chr1	11967064	11970949	loop_33
chr1	11969917	11969917	rs926271	Blood_protein_levels_EUR	0	0	0	0	0	EBNA2_gain_loop	chr1	11967064	11970949	loop_33
chr1	11970516	11970516	rs34139808	Diastolic_blood_pressure_x_alcohol_consumption_interaction__2df_test_AFR,Systolic_blood_pressure_x_alcohol_consumption_interaction__2df_test_AFR,Mean_arterial_pressure_x_alcohol_consumption_interaction__2df_test_AMR,Diastolic_blood_pressure_x_alcohol_consumption_interaction__2df_test_EAS,Mean_arterial_pressure_x_alcohol_consumption_interaction__2df_test_EAS,Systolic_blood_pressure_x_alcohol_consu…	0	0	0	0	0	EBNA2_gain_loop	chr1	11967064	11970949	loop_33
chr1	11973523	11973523	rs34550591	Diastolic_blood_pressure_x_alcohol_consumption_interaction__2df_test_AFR,Systolic_blood_pressure_x_alcohol_consumption_interaction__2df_test_AFR,Mean_arterial_pressure_x_alcohol_consumption_interaction__2df_test_AMR,Diastolic_blood_pressure_x_alcohol_consumption_interaction__2df_test_EAS,Mean_arterial_pressure_x_alcohol_consumption_interaction__2df_test_EAS,Systolic_blood_pressure_x_alcohol_consu…	0	0	0	0	0	EBNA2_gain_loop	chr1	11973312	11976532	loop_34
chr1	11973888	11973888	rs7554547	Blood_protein_levels_EUR	0	0	0	0	0	EBNA2_gain_loop	chr1	11973312	11976532	loop_34
chr1	11974514	11974514	rs12730576	Mean_arterial_pressure_x_alcohol_consumption_interaction__2df_test_AMR,Diastolic_blood_pressure_x_alcohol_consumption_interaction__2df_test_EAS,Mean_arterial_pressure_x_alcohol_consumption_interaction__2df_test_EAS,Systolic_blood_pressure_x_alcohol_consumption_interaction__2df_test_EAS,Mean_arterial_pressure_x_alcohol_consumption_interaction__2df_test_EUR,Systolic_blood_pressure_x_alcohol_consump…	0	0	0	0	0	EBNA2_gain_loop	chr1	11973312	11976532	loop_34
chr1	11975265	11975265	rs34811166	Diastolic_blood_pressure_x_alcohol_consumption_interaction__2df_test_AFR,Systolic_blood_pressure_x_alcohol_consumption_interaction__2df_test_AFR,Mean_arterial_pressure_x_alcohol_consumption_interaction__2df_test_AMR,Diastolic_blood_pressure_x_alcohol_consumption_interaction__2df_test_EAS,Mean_arterial_pressure_x_alcohol_consumption_interaction__2df_test_EAS,Systolic_blood_pressure_x_alcohol_consu…	0	0	0	0	0	EBNA2_gain_loop	chr1	11973312	11976532	loop_34
chr1	11975473	11975473	rs12722876	Diastolic_blood_pressure_x_alcohol_consumption_interaction__2df_test_AFR,Systolic_blood_pressure_x_alcohol_consumption_interaction__2df_test_AFR,Mean_arterial_pressure_x_alcohol_consumption_interaction__2df_test_AMR,Diastolic_blood_pressure_x_alcohol_consumption_interaction__2df_test_EAS,Mean_arterial_pressure_x_alcohol_consumption_interaction__2df_test_EAS,Systolic_blood_pressure_x_alcohol_consu…	0	0	0	0	0	EBNA2_gain_loop	chr1	11973312	11976532	loop_34
chr1	11975524	11975524	rs71647017	Diastolic_blood_pressure_x_alcohol_consumption_interaction__2df_test_AFR,Systolic_blood_pressure_x_alcohol_consumption_interaction__2df_test_AFR,Mean_arterial_pressure_x_alcohol_consumption_interaction__2df_test_AMR,Diastolic_blood_pressure_x_alcohol_consumption_interaction__2df_test_EAS,Mean_arterial_pressure_x_alcohol_consumption_interaction__2df_test_EAS,Systolic_blood_pressure_x_alcohol_consu…	0	0	0	0	0	EBNA2_gain_loop	chr1	11973312	11976532	loop_34
chr1	11975683	11975683	rs2336378	Blood_protein_levels_EUR	0	0	0	0	0	EBNA2_gain_loop	chr1	11973312	11976532	loop_34
chr1	11993881	11993881	rs139107585	Diastolic_blood_pressure_x_alcohol_consumption_interaction__2df_test_EAS,Systolic_blood_pressure_x_alcohol_consumption_interaction__2df_test_EAS	0	0	0	0	0	EBNA2_gain_loop	chr1	11993698	11995318	loop_34
chr1	15849855	15849855	rs4233538	Estimated_glomerular_filtration_rate_AFR,Estimated_glomerular_filtration_rate_AMR,Estimated_glomerular_filtration_rate_EAS,Estimated_glomerular_filtration_rate_EUR,Glomerular_filtration_rate__creatinine_EUR,Glomerular_filtration_rate_in_non_diabetics__creatinine_EUR	0	0	0	0	0	EBNA2_gain_loop	chr1	15849744	15853967	loop_39
chr1	15850097	15850097	rs10803388	Estimated_glomerular_filtration_rate_AFR,Estimated_glomerular_filtration_rate_AMR,Estimated_glomerular_filtration_rate_EAS,Estimated_glomerular_filtration_rate_EUR,Glomerular_filtration_rate__creatinine_EUR,Glomerular_filtration_rate_in_non_diabetics__creatinine_EUR	0	0	0	0	0	EBNA2_gain_loop	chr1	15849744	15853967	loop_39
chr1	15850343	15850343	rs4645989	Estimated_glomerular_filtration_rate_AFR,Estimated_glomerular_filtration_rate_AMR,Estimated_glomerular_filtration_rate_EAS,Estimated_glomerular_filtration_rate_EUR,Glomerular_filtration_rate__creatinine_EUR,Glomerular_filtration_rate_in_non_diabetics__creatinine_EUR	0	0	0	0	0	EBNA2_gain_loop	chr1	15849744	15853967	loop_39
chr1	15850603	15850603	rs4645983	Pulse_pressure_EAS	0	0	0	0	0	EBNA2_gain_loop	chr1	15849744	15853967	loop_39
chr1	15850792	15850792	rs142513755	Pulse_pressure_EAS	0	0	0	0	0	EBNA2_gain_loop	chr1	15849744	15853967	loop_39
chr1	15852060	15852060	rs76986450	Estimated_glomerular_filtration_rate_AMR,Estimated_glomerular_filtration_rate_EAS,Estimated_glomerular_filtration_rate_EUR,Glomerular_filtration_rate__creatinine_EUR,Glomerular_filtration_rate_in_non_diabetics__creatinine_EUR	0	0	0	0	0	EBNA2_gain_loop	chr1	15849744	15853967	loop_39
chr1	15853276	15853276	rs12741552	Estimated_glomerular_filtration_rate_AFR,Estimated_glomerular_filtration_rate_AMR,Estimated_glomerular_filtration_rate_EAS,Estimated_glomerular_filtration_rate_EUR,Glomerular_filtration_rate__creatinine_EUR,Glomerular_filtration_rate_in_non_diabetics__creatinine_EUR	0	0	0	0	0	EBNA2_gain_loop	chr1	15849744	15853967	loop_39
chr1	15853551	15853551	rs3795758	Estimated_glomerular_filtration_rate_AFR,Estimated_glomerular_filtration_rate_AMR,Estimated_glomerular_filtration_rate_EAS,Estimated_glomerular_filtration_rate_EUR,Glomerular_filtration_rate__creatinine_EUR,Glomerular_filtration_rate_in_non_diabetics__creatinine_EUR	0	0	0	0	0	EBNA2_gain_loop	chr1	15849744	15853967	loop_39
chr1	15853628	15853628	rs3795759	Estimated_glomerular_filtration_rate_AFR,Estimated_glomerular_filtration_rate_AMR,Estimated_glomerular_filtration_rate_EAS,Estimated_glomerular_filtration_rate_EUR,Glomerular_filtration_rate__creatinine_EUR,Glomerular_filtration_rate_in_non_diabetics__creatinine_EUR	0	0	0	0	0	EBNA2_gain_loop	chr1	15849744	15853967	loop_39
chr1	15911010	15911010	rs10927807	Estimated_glomerular_filtration_rate_EAS	0	0	0	0	0	EBNA2_gain_loop	chr1	15910342	15912494	loop_40
chr1	15911031	15911031	rs10927808	Estimated_glomerular_filtration_rate_EAS	0	0	0	0	0	EBNA2_gain_loop	chr1	15910342	15912494	loop_40
chr1	15911131	15911131	rs59475085	Pulse_pressure_EAS	0	0	0	0	0	EBNA2_gain_loop	chr1	15910342	15912494	loop_40
chr1	15911131	15911131	rs59475085	Pulse_pressure_EAS	0	0	0	0	0	EBNA2_up_genes	chr1	15911104	15912104	AGMAT
chr1	15911349	15911349	rs3737705	Estimated_glomerular_filtration_rate_AFR,Estimated_glomerular_filtration_rate_AMR,Estimated_glomerular_filtration_rate_EAS,Estimated_glomerular_filtration_rate_EUR,Glomerular_filtration_rate__creatinine_EUR,Glomerular_filtration_rate_in_non_diabetics__creatinine_EUR	0	0	0	0	0	EBNA2_gain_loop	chr1	15910342	15912494	loop_40
chr1	15911349	15911349	rs3737705	Estimated_glomerular_filtration_rate_AFR,Estimated_glomerular_filtration_rate_AMR,Estimated_glomerular_filtration_rate_EAS,Estimated_glomerular_filtration_rate_EUR,Glomerular_filtration_rate__creatinine_EUR,Glomerular_filtration_rate_in_non_diabetics__creatinine_EUR	0	0	0	0	0	EBNA2_up_genes	chr1	15911104	15912104	AGMAT
chr1	15911493	15911493	rs6687474	Estimated_glomerular_filtration_rate_EAS	0	0	0	0	0	EBNA2_gain_loop	chr1	15910342	15912494	loop_40
chr1	15911493	15911493	rs6687474	Estimated_glomerular_filtration_rate_EAS	0	0	0	0	0	EBNA2_up_genes	chr1	15911104	15912104	AGMAT
chr1	15911597	15911597	rs6687585	Estimated_glomerular_filtration_rate_EAS	0	0	0	0	0	EBNA2_gain_loop	chr1	15910342	15912494	loop_40
chr1	15911597	15911597	rs6687585	Estimated_glomerular_filtration_rate_EAS	0	0	0	0	0	EBNA2_up_genes	chr1	15911104	15912104	AGMAT
chr1	15911622	15911622	rs111365202	Estimated_glomerular_filtration_rate_EAS	0	0	0	0	0	EBNA2_gain_loop	chr1	15910342	15912494	loop_40
chr1	15911622	15911622	rs111365202	Estimated_glomerular_filtration_rate_EAS	0	0	0	0	0	EBNA2_up_genes	chr1	15911104	15912104	AGMAT
chr1	15911730	15911730	rs6690219	Estimated_glomerular_filtration_rate_AFR,Estimated_glomerular_filtration_rate_AMR,Estimated_glomerular_filtration_rate_EAS,Estimated_glomerular_filtration_rate_EUR,Glomerular_filtration_rate__creatinine_EUR,Glomerular_filtration_rate_in_non_diabetics__creatinine_EUR	0	0	0	0	0	EBNA2_gain_loop	chr1	15910342	15912494	loop_40
chr1	15911730	15911730	rs6690219	Estimated_glomerular_filtration_rate_AFR,Estimated_glomerular_filtration_rate_AMR,Estimated_glomerular_filtration_rate_EAS,Estimated_glomerular_filtration_rate_EUR,Glomerular_filtration_rate__creatinine_EUR,Glomerular_filtration_rate_in_non_diabetics__creatinine_EUR	0	0	0	0	0	EBNA2_up_genes	chr1	15911104	15912104	AGMAT
chr1	15911777	15911777	rs112795879	Estimated_glomerular_filtration_rate_EAS	0	0	0	0	0	EBNA2_gain_loop	chr1	15910342	15912494	loop_40
chr1	15911777	15911777	rs112795879	Estimated_glomerular_filtration_rate_EAS	0	0	0	0	0	EBNA2_up_genes	chr1	15911104	15912104	AGMAT
chr1	15911847	15911847	rs6692814	Estimated_glomerular_filtration_rate_EAS	0	0	0	0	0	EBNA2_gain_loop	chr1	15910342	15912494	loop_40
chr1	15911847	15911847	rs6692814	Estimated_glomerular_filtration_rate_EAS	0	0	0	0	0	EBNA2_up_genes	chr1	15911104	15912104	AGMAT
chr1	15911947	15911947	rs45619934	Estimated_glomerular_filtration_rate_AFR,Estimated_glomerular_filtration_rate_AMR,Estimated_glomerular_filtration_rate_EAS,Estimated_glomerular_filtration_rate_EUR,Glomerular_filtration_rate__creatinine_EUR,Glomerular_filtration_rate_in_non_diabetics__creatinine_EUR	0	0	0	0	0	EBNA2_gain_loop	chr1	15910342	15912494	loop_40
chr1	15911947	15911947	rs45619934	Estimated_glomerular_filtration_rate_AFR,Estimated_glomerular_filtration_rate_AMR,Estimated_glomerular_filtration_rate_EAS,Estimated_glomerular_filtration_rate_EUR,Glomerular_filtration_rate__creatinine_EUR,Glomerular_filtration_rate_in_non_diabetics__creatinine_EUR	0	0	0	0	0	EBNA2_up_genes	chr1	15911104	15912104	AGMAT
chr1	15912401	15912401	rs60590109	Estimated_glomerular_filtration_rate_EAS	0	0	0	0	0	EBNA2_gain_loop	chr1	15910342	15912494	loop_40
chr1	15912413	15912413	rs59666752	Estimated_glomerular_filtration_rate_EAS	0	0	0	0	0	EBNA2_gain_loop	chr1	15910342	15912494	loop_40
chr1	15912476	15912476	rs57109480	Estimated_glomerular_filtration_rate_AFR,Estimated_glomerular_filtration_rate_AMR,Estimated_glomerular_filtration_rate_EAS,Estimated_glomerular_filtration_rate_EUR,Glomerular_filtration_rate__creatinine_EUR,Glomerular_filtration_rate_in_non_diabetics__creatinine_EUR	0	0	0	0	0	EBNA2_gain_loop	chr1	15910342	15912494	loop_40
chr1	15925487	15925487	rs6693189	Chronotype_EUR,Morning_person_EUR	0	0	0	0	0	EBNA2_gain_loop	chr1	15925394	15927078	loop_40
chr1	15925823	15925823	rs58567918	Pulse_pressure_AMR,Pulse_pressure_EUR	0	0	0	0	0	EBNA2_gain_loop	chr1	15925394	15927078	loop_40
chr1	15926142	15926142	rs72645871	Pulse_pressure_AMR,Pulse_pressure_EUR	0	0	0	0	0	EBNA2_gain_loop	chr1	15925394	15927078	loop_40
chr1	15926217	15926217	rs74054797	Pulse_pressure_AMR,Pulse_pressure_EUR	0	0	0	0	0	EBNA2_gain_loop	chr1	15925394	15927078	loop_40
chr1	15926238	15926238	rs72645874	Pulse_pressure_AMR,Pulse_pressure_EUR	0	0	0	0	0	EBNA2_gain_loop	chr1	15925394	15927078	loop_40
chr1	15926296	15926296	rs61056912	Pulse_pressure_AMR,Pulse_pressure_EUR	0	0	0	0	0	EBNA2_gain_loop	chr1	15925394	15927078	loop_40
chr1	15926413	15926413	rs369150214	Pulse_pressure_AMR,Pulse_pressure_EUR	0	0	0	0	0	EBNA2_gain_loop	chr1	15925394	15927078	loop_40
chr1	15926508	15926508	chr1_15926508	Chronotype_EUR,Morning_person_EUR	0	0	0	0	0	EBNA2_gain_loop	chr1	15925394	15927078	loop_40
chr1	15926615	15926615	rs113548027	Pulse_pressure_AMR,Pulse_pressure_EUR	0	0	0	0	0	EBNA2_gain_loop	chr1	15925394	15927078	loop_40
chr1	15926857	15926857	rs78438907	Pulse_pressure_AMR,Pulse_pressure_EUR	0	0	0	0	0	EBNA2_gain_loop	chr1	15925394	15927078	loop_40
chr1	15944384	15944384	rs75354298	Chronotype_EUR,Morning_person_EUR	0	0	0	0	0	EBNA2_gain_loop	chr1	15942830	15945858	loop_39
chr1	15944620	15944620	rs74057713	Pulse_pressure_AFR,Pulse_pressure_AMR,Pulse_pressure_EAS,Pulse_pressure_EUR	0	0	0	0	0	EBNA2_gain_loop	chr1	15942830	15945858	loop_39
chr1	15945140	15945140	rs72647113	Chronotype_EUR,Morning_person_EUR	0	0	0	0	0	EBNA2_gain_loop	chr1	15942830	15945858	loop_39
chr1	15945595	15945595	rs6429762	Pulse_pressure_AMR,Pulse_pressure_EAS,Pulse_pressure_EUR	0	0	0	0	0	EBNA2_gain_loop	chr1	15942830	15945858	loop_39
chr1	21380070	21380070	chr1_21380070	Social_science_traits__pleiotropy___HIPO_component_1_EUR,Well_being_spectrum__multivariate_analysis_EUR	0	0	0	0	0	EBNA2_closed_chromatin	chr1	21379898	21380173	138
chr1	21380173	21380173	rs374607024	Chronotype_EUR,Depressive_symptoms_EUR,General_risk_tolerance__MTAG_EUR,Life_satisfaction_EUR,Morning_person_EUR,Neuroticism_EUR,Positive_affect_EUR,Social_science_traits__pleiotropy___HIPO_component_1_EUR	0	0	0	0	0	EBNA2_closed_chromatin	chr1	21379898	21380173	138
chr1	22087678	22087678	rs7539759	Type_2_diabetes_EAS	0	0	1	0	0	EBNA2_gain_loop	chr1	22087538	22091884	loop_45
chr1	23963373	23963373	rs72453226	Chronic_lymphocytic_leukemia_EUR	0	0	0	0	0	EBNA2_gain_loop	chr1	23960194	23967263	loop_50
chr1	24150437	24150437	rs10554242	Eosinophil_counts_EUR,Eosinophil_percentage_of_granulocytes_EUR,Eosinophil_percentage_of_white_cells_EUR,Immature_fraction_of_reticulocytes_EUR	0	0	1	0	0	EBNA2_gain_loop	chr1	24150080	24153357	loop_58
chr1	24151996	24151996	rs6697805	Eosinophil_counts_EUR,Eosinophil_percentage_of_granulocytes_EUR,Eosinophil_percentage_of_white_cells_EUR,Immature_fraction_of_reticulocytes_EUR	0	0	1	0	0	EBNA2_gain_loop	chr1	24150080	24153357	loop_58
chr1	24152401	24152401	rs59640963	Eosinophil_counts_EUR,Eosinophil_percentage_of_granulocytes_EUR,Eosinophil_percentage_of_white_cells_EUR,Immature_fraction_of_reticulocytes_EUR	0	0	1	0	0	EBNA2_gain_loop	chr1	24150080	24153357	loop_58
chr1	24153231	24153231	rs6424115	Eosinophil_counts_EUR,Eosinophil_percentage_of_granulocytes_EUR,Eosinophil_percentage_of_white_cells_EUR,Immature_fraction_of_reticulocytes_EUR	0	0	1	0	0	EBNA2_gain_loop	chr1	24150080	24153357	loop_58
chr1	24161266	24161266	rs35256235	Eosinophil_counts_EUR,Eosinophil_percentage_of_granulocytes_EUR,Eosinophil_percentage_of_white_cells_EUR,Immature_fraction_of_reticulocytes_EUR	0	0	1	0	0	EBNA2_gain_loop	chr1	24160452	24162016	loop_58
chr1	24513613	24513613	rs78312791	Chronic_inflammatory_diseases__ankylosing_spondylitis__Crohn_s_disease__psoriasis__primary_sclerosing_cholangitis__ulcerative_colitis___pleiotropy_EUR,Psoriasis_EUR,Psoriasis_vulgaris_EUR	1	1	1	0	1	EBNA2_loss_loop	chr1	24513353	24518782	loop_3
chr1	24513768	24513768	rs4090311	Chronic_inflammatory_diseases__ankylosing_spondylitis__Crohn_s_disease__psoriasis__primary_sclerosing_cholangitis__ulcerative_colitis___pleiotropy_EUR,Psoriasis_EUR,Psoriasis_vulgaris_EUR	1	1	1	0	1	EBNA2_loss_loop	chr1	24513353	24518782	loop_3
chr1	24516387	24516387	rs113333331	Chronic_inflammatory_diseases__ankylosing_spondylitis__Crohn_s_disease__psoriasis__primary_sclerosing_cholangitis__ulcerative_colitis___pleiotropy_EUR,Psoriasis_EUR,Psoriasis_vulgaris_EUR	1	1	1	0	1	EBNA2_loss_loop	chr1	24513353	24518782	loop_3
chr1	24518206	24518206	rs10794648	Inflammatory_skin_disease_EUR	1	0	1	1	0	EBNA2_loss_loop	chr1	24513353	24518782	loop_3
chr1	24518643	24518643	rs7552167	Chronic_inflammatory_diseases__ankylosing_spondylitis__Crohn_s_disease__psoriasis__primary_sclerosing_cholangitis__ulcerative_colitis___pleiotropy_EUR,Psoriasis_EUR,Psoriasis_vulgaris_EUR	1	1	1	0	1	EBNA2_loss_loop	chr1	24513353	24518782	loop_3
chr1	25071575	25071575	rs3838977	Heel_bone_mineral_density_EUR	0	0	0	0	0	EBNA2_gain_loop	chr1	25071250	25077093	loop_60
chr1	25073020	25073020	rs4649017	Heel_bone_mineral_density_EUR	0	0	0	0	0	EBNA2_gain_loop	chr1	25071250	25077093	loop_60
chr1	25073571	25073571	rs11249171	Height_EUR,Plateletcrit_EUR	0	0	0	0	0	EBNA2_gain_loop	chr1	25071250	25077093	loop_60
chr1	25075801	25075801	rs1890449	Height_EUR,Plateletcrit_EUR	0	0	0	0	0	EBNA2_gain_loop	chr1	25071250	25077093	loop_60
chr1	25175246	25175246	rs4648879	Height_EUR,Plateletcrit_EUR	0	0	0	0	0	EBNA2_loss_loop	chr1	25174037	25176568	loop_3
chr1	25291010	25291010	rs6672420	Ankylosing_spondylitis_EAS,Ankylosing_spondylitis_EUR,Celiac_disease_EUR,Chronic_inflammatory_diseases__ankylosing_spondylitis__Crohn_s_disease__psoriasis__primary_sclerosing_cholangitis__ulcerative_colitis___pleiotropy_EUR,Psoriasis_EUR,Psoriasis_vulgaris_EUR	1	1	1	0	1	EBNA2_gain_loop	chr1	25290293	25293798	loop_64
chr1	25291697	25291697	rs188468174	Male_pattern_baldness_EUR	0	0	0	0	0	EBNA2_gain_loop	chr1	25290293	25293798	loop_64
chr1	25292668	25292668	rs7528484	Ankylosing_spondylitis_EAS,Ankylosing_spondylitis_EUR,Celiac_disease_EUR,Chronic_inflammatory_diseases__ankylosing_spondylitis__Crohn_s_disease__psoriasis__primary_sclerosing_cholangitis__ulcerative_colitis___pleiotropy_EUR,Psoriasis_EUR,Psoriasis_vulgaris_EUR	1	1	1	0	1	EBNA2_gain_loop	chr1	25290293	25293798	loop_64
chr1	25293084	25293084	rs7536201	Ankylosing_spondylitis_EAS,Ankylosing_spondylitis_EUR,Celiac_disease_EUR,Chronic_inflammatory_diseases__ankylosing_spondylitis__Crohn_s_disease__psoriasis__primary_sclerosing_cholangitis__ulcerative_colitis___pleiotropy_EUR,Psoriasis_EUR,Psoriasis_vulgaris_EUR	1	1	1	0	1	EBNA2_gain_loop	chr1	25290293	25293798	loop_64
chr1	25293201	25293201	rs11249212	Ankylosing_spondylitis_EAS,Ankylosing_spondylitis_EUR,Celiac_disease_EUR,Chronic_inflammatory_diseases__ankylosing_spondylitis__Crohn_s_disease__psoriasis__primary_sclerosing_cholangitis__ulcerative_colitis___pleiotropy_EUR,Psoriasis_EUR,Psoriasis_vulgaris_EUR	1	1	1	0	1	EBNA2_gain_loop	chr1	25290293	25293798	loop_64
chr1	25293216	25293216	rs7414934	Ankylosing_spondylitis_EAS,Ankylosing_spondylitis_EUR,Celiac_disease_EUR,Chronic_inflammatory_diseases__ankylosing_spondylitis__Crohn_s_disease__psoriasis__primary_sclerosing_cholangitis__ulcerative_colitis___pleiotropy_EUR,Psoriasis_EUR,Psoriasis_vulgaris_EUR	1	1	1	0	1	EBNA2_gain_loop	chr1	25290293	25293798	loop_64
chr1	25293237	25293237	rs11249213	Ankylosing_spondylitis_EAS,Ankylosing_spondylitis_EUR,Celiac_disease_EUR,Chronic_inflammatory_diseases__ankylosing_spondylitis__Crohn_s_disease__psoriasis__primary_sclerosing_cholangitis__ulcerative_colitis___pleiotropy_EUR,Psoriasis_EUR,Psoriasis_vulgaris_EUR	1	1	1	0	1	EBNA2_gain_loop	chr1	25290293	25293798	loop_64
chr1	25293356	25293356	rs4265380	Ankylosing_spondylitis_EAS,Ankylosing_spondylitis_EUR,Celiac_disease_EUR,Chronic_inflammatory_diseases__ankylosing_spondylitis__Crohn_s_disease__psoriasis__primary_sclerosing_cholangitis__ulcerative_colitis___pleiotropy_EUR,Psoriasis_EUR,Psoriasis_vulgaris_EUR	1	1	1	0	1	EBNA2_gain_loop	chr1	25290293	25293798	loop_64
chr1	25293775	25293775	rs11311495	Ankylosing_spondylitis_EAS,Ankylosing_spondylitis_EUR,Celiac_disease_EUR,Chronic_inflammatory_diseases__ankylosing_spondylitis__Crohn_s_disease__psoriasis__primary_sclerosing_cholangitis__ulcerative_colitis___pleiotropy_EUR,Psoriasis_EUR,Psoriasis_vulgaris_EUR	1	1	1	0	1	EBNA2_gain_loop	chr1	25290293	25293798	loop_64
chr1	25345543	25345543	rs56403476	Male_pattern_baldness_EUR	0	0	0	0	0	EBNA2_gain_loop	chr1	25344038	25350830	loop_64
chr1	25347577	25347577	rs11249243	Male_pattern_baldness_EUR	0	0	0	0	0	EBNA2_gain_loop	chr1	25344038	25350830	loop_64
chr1	26452024	26452024	rs140163051	Fat_free_mass_EUR	0	0	0	0	0	EBNA2_gain_loop	chr1	26451184	26455613	loop_66
chr1	26452386	26452386	rs17257127	Fat_free_mass_EUR	0	0	0	0	0	EBNA2_gain_loop	chr1	26451184	26455613	loop_66
chr1	26452604	26452604	rs72886619	Fat_free_mass_EUR	0	0	0	0	0	EBNA2_gain_loop	chr1	26451184	26455613	loop_66
chr1	26453394	26453394	rs61776594	Fat_free_mass_EUR	0	0	0	0	0	EBNA2_gain_loop	chr1	26451184	26455613	loop_66
chr1	26453396	26453396	rs61776595	Fat_free_mass_EUR	0	0	0	0	0	EBNA2_gain_loop	chr1	26451184	26455613	loop_66
chr1	26454881	26454881	rs60404932	Fat_free_mass_EUR	0	0	0	0	0	EBNA2_gain_loop	chr1	26451184	26455613	loop_66
chr1	26454968	26454968	rs61776596	Fat_free_mass_EUR	0	0	0	0	0	EBNA2_gain_loop	chr1	26451184	26455613	loop_66
chr1	26455182	26455182	rs2783670	Fat_free_mass_EUR	0	0	0	0	0	EBNA2_gain_loop	chr1	26451184	26455613	loop_66
chr1	26455273	26455273	rs61776597	Fat_free_mass_EUR	0	0	0	0	0	EBNA2_gain_loop	chr1	26451184	26455613	loop_66
chr1	26455319	26455319	rs72886625	Fat_free_mass_EUR	0	0	0	0	0	EBNA2_gain_loop	chr1	26451184	26455613	loop_66
chr1	26496455	26496455	rs2232648	Heel_bone_mineral_density_EUR	0	0	0	0	0	EBNA2_gain_loop	chr1	26495815	26497558	loop_66
chr1	26605069	26605069	rs8564	Granulocyte_percentage_of_myeloid_white_cells_EUR	0	0	1	0	0	EBNA2_gain_loop	chr1	26604901	26608584	loop_68
chr1	26606029	26606029	rs111692007	Granulocyte_percentage_of_myeloid_white_cells_EUR	0	0	1	0	0	EBNA2_gain_loop	chr1	26604901	26608584	loop_68
chr1	26606174	26606174	rs10902732	Granulocyte_percentage_of_myeloid_white_cells_EUR	0	0	1	0	0	EBNA2_gain_loop	chr1	26604901	26608584	loop_68
chr1	26607726	26607726	rs7544	Granulocyte_percentage_of_myeloid_white_cells_EUR	0	0	1	0	0	EBNA2_gain_loop	chr1	26604901	26608584	loop_68
chr1	26626612	26626612	rs12728971	Monocyte_percentage_of_white_cells_EUR	0	0	1	0	0	EBNA2_gain_loop	chr1	26626533	26628631	loop_68
chr1	26626967	26626967	rs4625269	Monocyte_percentage_of_white_cells_EUR	0	0	1	0	0	EBNA2_gain_loop	chr1	26626533	26628631	loop_68
chr1	26627125	26627125	rs5773153	Monocyte_percentage_of_white_cells_EUR	0	0	1	0	0	EBNA2_gain_loop	chr1	26626533	26628631	loop_68
chr1	26627478	26627478	rs2276712	Monocyte_percentage_of_white_cells_EUR	0	0	1	0	0	EBNA2_gain_loop	chr1	26626533	26628631	loop_68
chr1	26627835	26627835	rs12085416	Granulocyte_percentage_of_myeloid_white_cells_EUR	0	0	1	0	0	EBNA2_gain_loop	chr1	26626533	26628631	loop_68
chr1	26627907	26627907	rs11247905	Granulocyte_percentage_of_myeloid_white_cells_EUR	0	0	1	0	0	EBNA2_gain_loop	chr1	26626533	26628631	loop_68
chr1	26631927	26631927	rs4333841	Monocyte_percentage_of_white_cells_EUR	0	0	1	0	0	EBNA2_gain_loop	chr1	26631554	26635661	loop_70
chr1	26632781	26632781	rs3795684	Monocyte_percentage_of_white_cells_EUR	0	0	1	0	0	EBNA2_gain_loop	chr1	26631554	26635661	loop_70
chr1	26632831	26632831	rs3795683	Monocyte_percentage_of_white_cells_EUR	0	0	1	0	0	EBNA2_gain_loop	chr1	26631554	26635661	loop_70
chr1	27018209	27018209	rs35161452	HDL_cholesterol_x_physical_activity_interaction__2df_test_AMR,HDL_cholesterol_levels_EAS,HDL_cholesterol_x_physical_activity_interaction__2df_test_EAS,High_density_lipoprotein_cholesterol_levels_EAS,LDL_cholesterol_levels_EAS,Triglyceride_levels_EAS,Blond_vs__brown_black_hair_color_EUR,HDL_cholesterol_levels_EUR,HDL_cholesterol_x_physical_activity_interaction__2df_test_EUR,LDL_cholesterol_EUR,LDL…	0	0	0	0	0	EBNA2_gain_loop	chr1	27018151	27025507	loop_70
chr1	27019131	27019131	rs112203773	Neutrophil_percentage_of_white_cells_EUR	0	0	1	0	0	EBNA2_gain_loop	chr1	27018151	27025507	loop_70
chr1	27019744	27019744	rs12738345	HDL_cholesterol_x_physical_activity_interaction__2df_test_AMR,HDL_cholesterol_levels_EAS,HDL_cholesterol_x_physical_activity_interaction__2df_test_EAS,High_density_lipoprotein_cholesterol_levels_EAS,LDL_cholesterol_levels_EAS,Triglyceride_levels_EAS,Blond_vs__brown_black_hair_color_EUR,HDL_cholesterol_levels_EUR,HDL_cholesterol_x_physical_activity_interaction__2df_test_EUR,LDL_cholesterol_EUR,LDL…	0	0	0	0	0	EBNA2_gain_loop	chr1	27018151	27025507	loop_70
chr1	27020012	27020012	rs4466675	Heel_bone_mineral_density_EUR	0	0	0	0	0	EBNA2_gain_loop	chr1	27018151	27025507	loop_70
chr1	27020093	27020093	rs66689878	HDL_cholesterol_x_physical_activity_interaction__2df_test_AMR,HDL_cholesterol_levels_EAS,HDL_cholesterol_x_physical_activity_interaction__2df_test_EAS,High_density_lipoprotein_cholesterol_levels_EAS,LDL_cholesterol_levels_EAS,Triglyceride_levels_EAS,Blond_vs__brown_black_hair_color_EUR,HDL_cholesterol_levels_EUR,HDL_cholesterol_x_physical_activity_interaction__2df_test_EUR,LDL_cholesterol_EUR,LDL…	0	0	0	0	0	EBNA2_gain_loop	chr1	27018151	27025507	loop_70
chr1	27020133	27020133	rs35738294	HDL_cholesterol_x_physical_activity_interaction__2df_test_AMR,HDL_cholesterol_levels_EAS,HDL_cholesterol_x_physical_activity_interaction__2df_test_EAS,High_density_lipoprotein_cholesterol_levels_EAS,LDL_cholesterol_levels_EAS,Triglyceride_levels_EAS,Blond_vs__brown_black_hair_color_EUR,HDL_cholesterol_levels_EUR,HDL_cholesterol_x_physical_activity_interaction__2df_test_EUR,LDL_cholesterol_EUR,LDL…	0	0	0	0	0	EBNA2_gain_loop	chr1	27018151	27025507	loop_70
chr1	27020591	27020591	rs71636769	HDL_cholesterol_x_physical_activity_interaction__2df_test_AMR,HDL_cholesterol_levels_EAS,HDL_cholesterol_x_physical_activity_interaction__2df_test_EAS,High_density_lipoprotein_cholesterol_levels_EAS,LDL_cholesterol_levels_EAS,Triglyceride_levels_EAS,Blond_vs__brown_black_hair_color_EUR,HDL_cholesterol_levels_EUR,HDL_cholesterol_x_physical_activity_interaction__2df_test_EUR,LDL_cholesterol_EUR,LDL…	0	0	0	0	0	EBNA2_gain_loop	chr1	27018151	27025507	loop_70
chr1	27021115	27021115	rs71636770	HDL_cholesterol_x_physical_activity_interaction__2df_test_AMR,HDL_cholesterol_levels_EAS,HDL_cholesterol_x_physical_activity_interaction__2df_test_EAS,High_density_lipoprotein_cholesterol_levels_EAS,LDL_cholesterol_levels_EAS,Triglyceride_levels_EAS,Blond_vs__brown_black_hair_color_EUR,HDL_cholesterol_levels_EUR,HDL_cholesterol_x_physical_activity_interaction__2df_test_EUR,LDL_cholesterol_EUR,LDL…	0	0	0	0	0	EBNA2_gain_loop	chr1	27018151	27025507	loop_70
chr1	27021913	27021913	rs114165349	High_density_lipoprotein_cholesterol_levels_EAS,Low_density_lipoprotein_cholesterol_levels_EAS,Systolic_blood_pressure_EAS,Triglycerides_EAS	0	0	0	0	0	EBNA2_gain_loop	chr1	27018151	27025507	loop_70
chr1	27191411	27191411	rs1883660	Chronic_obstructive_pulmonary_disease_or_high_blood_pressure__pleiotropy_EUR,Granulocyte_percentage_of_myeloid_white_cells_EUR,Monocyte_percentage_of_white_cells_EUR,Self_reported_math_ability_EUR,Self_reported_math_ability__MTAG_EUR	0	0	1	0	0	EBNA2_gain_loop	chr1	27190248	27192898	loop_72
chr1	27216669	27216669	rs11555809	HDL_cholesterol_x_physical_activity_interaction__2df_test_AMR,Blond_vs__brown_black_hair_color_EUR,HDL_cholesterol_levels_EUR,HDL_cholesterol_x_physical_activity_interaction__2df_test_EUR,LDL_cholesterol_EUR,LDL_cholesterol_levels_EUR,Triglyceride_levels_EUR	0	0	0	0	0	EBNA2_gain_loop	chr1	27215659	27217978	loop_72
chr1	27668610	27668610	rs41291086	High_density_lipoprotein_cholesterol_levels_EAS,Low_density_lipoprotein_cholesterol_levels_EAS,Systolic_blood_pressure_EAS,Triglycerides_EAS	0	0	0	0	0	EBNA2_loss_loop	chr1	27666804	27670657	loop_4
chr1	27730258	27730258	rs2504763	Blood_protein_levels_EUR,Systolic_blood_pressure_EUR	0	0	0	0	0	EBNA2_gain_loop	chr1	27729138	27734014	loop_76
chr1	27732910	27732910	rs11548324	Blood_protein_levels_EUR,Systolic_blood_pressure_EUR	0	0	0	0	0	EBNA2_gain_loop	chr1	27729138	27734014	loop_76
chr1	27754076	27754076	rs2504771	Blood_protein_levels_EUR,Systolic_blood_pressure_EUR	0	0	0	0	0	EBNA2_loss_loop	chr1	27753757	27757210	loop_4
chr1	27755557	27755557	rs74061798	Systolic_blood_pressure_AMR,Blood_protein_levels_EUR,Systolic_blood_pressure_EUR	0	0	0	0	0	EBNA2_loss_loop	chr1	27753757	27757210	loop_4
chr1	27755669	27755669	rs2474293	Blood_protein_levels_EUR,Systolic_blood_pressure_EUR	0	0	0	0	0	EBNA2_loss_loop	chr1	27753757	27757210	loop_4
chr1	27755909	27755909	rs2504772	Systolic_blood_pressure_AMR,Blood_protein_levels_EUR,Systolic_blood_pressure_EUR	0	0	0	0	0	EBNA2_loss_loop	chr1	27753757	27757210	loop_4
chr1	27756061	27756061	rs113035001	Systolic_blood_pressure_AMR,Blood_protein_levels_EUR,Systolic_blood_pressure_EUR	0	0	0	0	0	EBNA2_loss_loop	chr1	27753757	27757210	loop_4
chr1	27768093	27768093	rs9438561	Blood_protein_levels_EUR,Systolic_blood_pressure_EUR	0	0	0	0	0	EBNA2_gain_loop	chr1	27768059	27771788	loop_79
chr1	27768093	27768093	rs9438561	Blood_protein_levels_EUR,Systolic_blood_pressure_EUR	0	0	0	0	0	EBNA2_loss_loop	chr1	27768059	27771788	loop_5
chr1	27769260	27769260	rs2504775	Systolic_blood_pressure_AMR,Blood_protein_levels_EUR,Systolic_blood_pressure_EUR	0	0	0	0	0	EBNA2_gain_loop	chr1	27768059	27771788	loop_79
chr1	27769260	27769260	rs2504775	Systolic_blood_pressure_AMR,Blood_protein_levels_EUR,Systolic_blood_pressure_EUR	0	0	0	0	0	EBNA2_loss_loop	chr1	27768059	27771788	loop_5
chr1	27770259	27770259	rs9438563	Blood_protein_levels_EUR,Systolic_blood_pressure_EUR	0	0	0	0	0	EBNA2_gain_loop	chr1	27768059	27771788	loop_79
chr1	27770259	27770259	rs9438563	Blood_protein_levels_EUR,Systolic_blood_pressure_EUR	0	0	0	0	0	EBNA2_loss_loop	chr1	27768059	27771788	loop_5
chr1	27770482	27770482	rs2504776	Systolic_blood_pressure_AFR,Systolic_blood_pressure_AMR,Blood_protein_levels_EUR,Systolic_blood_pressure_EUR	0	0	0	0	0	EBNA2_gain_loop	chr1	27768059	27771788	loop_79
chr1	27770482	27770482	rs2504776	Systolic_blood_pressure_AFR,Systolic_blood_pressure_AMR,Blood_protein_levels_EUR,Systolic_blood_pressure_EUR	0	0	0	0	0	EBNA2_loss_loop	chr1	27768059	27771788	loop_5
chr1	27809569	27809569	rs9438576	Blood_protein_levels_EUR,Systolic_blood_pressure_EUR	0	0	0	0	0	EBNA2_gain_loop	chr1	27807985	27811693	loop_81
chr1	27809584	27809584	rs9438522	Systolic_blood_pressure_AMR,Blood_protein_levels_EUR,Systolic_blood_pressure_EUR	0	0	0	0	0	EBNA2_gain_loop	chr1	27807985	27811693	loop_81
chr1	27810317	27810317	rs9438523	Blood_protein_levels_EUR,Systolic_blood_pressure_EUR	0	0	0	0	0	EBNA2_gain_loop	chr1	27807985	27811693	loop_81
chr1	27850075	27850075	rs74606343	Pulse_pressure_EUR	0	0	0	0	0	EBNA2_gain_loop	chr1	27850026	27855583	loop_83
chr1	27850514	27850514	rs72884651	Pulse_pressure_AMR,Pulse_pressure_EUR	0	0	0	0	0	EBNA2_gain_loop	chr1	27850026	27855583	loop_83
chr1	27851083	27851083	rs72884654	Pulse_pressure_AMR,Pulse_pressure_EUR	0	0	0	0	0	EBNA2_gain_loop	chr1	27850026	27855583	loop_83
chr1	27853214	27853214	rs6691967	Pulse_pressure_EAS	0	0	0	0	0	EBNA2_gain_loop	chr1	27850026	27855583	loop_83
chr1	27958102	27958102	rs79532776	High_density_lipoprotein_cholesterol_levels_EAS,Low_density_lipoprotein_cholesterol_levels_EAS,Systolic_blood_pressure_EAS,Triglycerides_EAS	0	0	0	0	0	EBNA2_gain_loop	chr1	27957306	27960537	loop_81
chr1	27961512	27961512	rs12037666	Body_mass_index_EAS	0	0	0	0	0	EBNA2_up_genes	chr1	27961226	27962226	FGR
chr1	28559574	28559574	rs510803	Blond_vs__brown_black_hair_color_EUR	0	0	0	0	0	EBNA2_gain_loop	chr1	28558176	28559808	loop_96
chr1	28559694	28559694	rs474597	Blond_vs__brown_black_hair_color_EUR	0	0	0	0	0	EBNA2_gain_loop	chr1	28558176	28559808	loop_96
chr1	28570179	28570179	rs514694	Blond_vs__brown_black_hair_color_EUR	0	0	0	0	0	EBNA2_gain_loop	chr1	28570173	28578168	loop_100
chr1	28570233	28570233	rs535708	Blond_vs__brown_black_hair_color_EUR	0	0	0	0	0	EBNA2_gain_loop	chr1	28570173	28578168	loop_100
chr1	28570349	28570349	rs534121	Blond_vs__brown_black_hair_color_EUR	0	0	0	0	0	EBNA2_gain_loop	chr1	28570173	28578168	loop_100
chr1	28570818	28570818	rs61785396	Blond_vs__brown_black_hair_color_EUR	0	0	0	0	0	EBNA2_gain_loop	chr1	28570173	28578168	loop_100
chr1	28570820	28570820	rs112807782	Blond_vs__brown_black_hair_color_EUR	0	0	0	0	0	EBNA2_gain_loop	chr1	28570173	28578168	loop_100
chr1	28571035	28571035	rs528482	Blond_vs__brown_black_hair_color_EUR	0	0	0	0	0	EBNA2_gain_loop	chr1	28570173	28578168	loop_100
chr1	28572207	28572207	rs12137239	Blond_vs__brown_black_hair_color_EUR	0	0	0	0	0	EBNA2_gain_loop	chr1	28570173	28578168	loop_100
chr1	28572227	28572227	rs12127089	Blond_vs__brown_black_hair_color_EUR	0	0	0	0	0	EBNA2_gain_loop	chr1	28570173	28578168	loop_100
chr1	28572480	28572480	rs568095	Blond_vs__brown_black_hair_color_EUR	0	0	0	0	0	EBNA2_gain_loop	chr1	28570173	28578168	loop_100
chr1	28573293	28573293	rs67092542	Blond_vs__brown_black_hair_color_EUR	0	0	0	0	0	EBNA2_gain_loop	chr1	28570173	28578168	loop_100
chr1	28573642	28573642	rs6691903	Blond_vs__brown_black_hair_color_EUR	0	0	0	0	0	EBNA2_gain_loop	chr1	28570173	28578168	loop_100
chr1	28573707	28573707	rs113355350	Blond_vs__brown_black_hair_color_EUR	0	0	0	0	0	EBNA2_gain_loop	chr1	28570173	28578168	loop_100
chr1	28573835	28573835	rs492554	Blond_vs__brown_black_hair_color_EUR	0	0	0	0	0	EBNA2_gain_loop	chr1	28570173	28578168	loop_100
chr1	28574043	28574043	rs515437	Blond_vs__brown_black_hair_color_EUR	0	0	0	0	0	EBNA2_gain_loop	chr1	28570173	28578168	loop_100
chr1	28574356	28574356	rs479144	Blond_vs__brown_black_hair_color_EUR	0	0	0	0	0	EBNA2_gain_loop	chr1	28570173	28578168	loop_100
chr1	28575121	28575121	rs530426	Blond_vs__brown_black_hair_color_EUR	0	0	0	0	0	EBNA2_gain_loop	chr1	28570173	28578168	loop_100
chr1	28575140	28575140	rs546569	Blond_vs__brown_black_hair_color_EUR	0	0	0	0	0	EBNA2_gain_loop	chr1	28570173	28578168	loop_100
chr1	28695187	28695187	rs7552396	Educational_attainment__MTAG_EUR	0	0	0	0	0	EBNA2_gain_loop	chr1	28695034	28697537	loop_101
chr1	28695187	28695187	rs7552396	Educational_attainment__MTAG_EUR	0	0	0	0	0	EBNA2_loss_loop	chr1	28695034	28697537	loop_6
chr1	28695262	28695262	rs139992595	Educational_attainment__MTAG_EUR	0	0	0	0	0	EBNA2_gain_loop	chr1	28695034	28697537	loop_101
chr1	28695262	28695262	rs139992595	Educational_attainment__MTAG_EUR	0	0	0	0	0	EBNA2_loss_loop	chr1	28695034	28697537	loop_6
chr1	28696091	28696091	rs11247790	Educational_attainment__MTAG_EUR	0	0	0	0	0	EBNA2_gain_loop	chr1	28695034	28697537	loop_101
chr1	28696091	28696091	rs11247790	Educational_attainment__MTAG_EUR	0	0	0	0	0	EBNA2_loss_loop	chr1	28695034	28697537	loop_6
chr1	28696392	28696392	rs6703793	Educational_attainment__MTAG_EUR	0	0	0	0	0	EBNA2_gain_loop	chr1	28695034	28697537	loop_101
chr1	28696392	28696392	rs6703793	Educational_attainment__MTAG_EUR	0	0	0	0	0	EBNA2_loss_loop	chr1	28695034	28697537	loop_6
chr1	28696678	28696678	rs6703997	Educational_attainment__MTAG_EUR	0	0	0	0	0	EBNA2_gain_loop	chr1	28695034	28697537	loop_101
chr1	28696678	28696678	rs6703997	Educational_attainment__MTAG_EUR	0	0	0	0	0	EBNA2_loss_loop	chr1	28695034	28697537	loop_6
chr1	28696852	28696852	rs6657867	Educational_attainment__MTAG_EUR	0	0	0	0	0	EBNA2_gain_loop	chr1	28695034	28697537	loop_101
chr1	28696852	28696852	rs6657867	Educational_attainment__MTAG_EUR	0	0	0	0	0	EBNA2_loss_loop	chr1	28695034	28697537	loop_6
chr1	28696890	28696890	rs6657880	Educational_attainment__MTAG_EUR	0	0	0	0	0	EBNA2_gain_loop	chr1	28695034	28697537	loop_101
chr1	28696890	28696890	rs6657880	Educational_attainment__MTAG_EUR	0	0	0	0	0	EBNA2_loss_loop	chr1	28695034	28697537	loop_6
chr1	28697135	28697135	rs67856516	Educational_attainment__MTAG_EUR	0	0	0	0	0	EBNA2_gain_loop	chr1	28695034	28697537	loop_101
chr1	28697135	28697135	rs67856516	Educational_attainment__MTAG_EUR	0	0	0	0	0	EBNA2_loss_loop	chr1	28695034	28697537	loop_6
chr1	28833494	28833494	rs2840758	Educational_attainment__MTAG_EUR	0	0	0	0	0	EBNA2_loss_loop	chr1	28830706	28835303	loop_7
chr1	28845037	28845037	rs192249373	Educational_attainment__MTAG_EUR	0	0	0	0	0	EBNA2_loss_loop	chr1	28844110	28847365	loop_6
chr1	28845976	28845976	rs61785982	Educational_attainment__MTAG_EUR	0	0	0	0	0	EBNA2_loss_loop	chr1	28844110	28847365	loop_6
chr1	29253563	29253563	rs203283	Diastolic_blood_pressure_EUR	0	0	0	0	0	EBNA2_open_Chromatin	chr1	29253371	29253739	193
chr1	31904584	31904584	rs4949405	Heart_rate_response_to_recovery_post_exercise__50_sec_EAS,Heart_rate_response_to_recovery_post_exercise__50_sec_EUR	0	0	0	0	0	EBNA2_closed_chromatin	chr1	31904552	31905087	274
chr1	31904584	31904584	rs4949405	Heart_rate_response_to_recovery_post_exercise__50_sec_EAS,Heart_rate_response_to_recovery_post_exercise__50_sec_EUR	0	0	0	0	0	EBNA2_closed_chromatin	chr1	31904563	31905093	274
chr1	32107622	32107622	rs6699558	Cognitive_ability_EUR,Cognitive_ability__MTAG_EUR,Cognitive_performance_EUR,Cognitive_performance__MTAG_EUR,General_cognitive_ability_EUR,Intelligence_EUR	0	0	0	0	0	EBNA2_gain_loop	chr1	32107608	32111695	loop_104
chr1	32108547	32108547	rs10798882	Cognitive_ability_EUR,Cognitive_ability__MTAG_EUR,Cognitive_performance_EUR,Cognitive_performance__MTAG_EUR,General_cognitive_ability_EUR,Intelligence_EUR,Intelligence__MTAG_EUR	0	0	0	0	0	EBNA2_gain_loop	chr1	32107608	32111695	loop_104
chr1	32108579	32108579	rs7524405	Cognitive_ability_EUR,Cognitive_ability__MTAG_EUR,Cognitive_performance_EUR,Cognitive_performance__MTAG_EUR,General_cognitive_ability_EUR,Intelligence_EUR,Intelligence__MTAG_EUR	0	0	0	0	0	EBNA2_gain_loop	chr1	32107608	32111695	loop_104
chr1	32108929	32108929	rs35361332	Body_mass_index_EUR,Intelligence__MTAG_EUR	0	0	0	0	0	EBNA2_gain_loop	chr1	32107608	32111695	loop_104
chr1	32109849	32109849	rs7549590	Body_mass_index_EUR,Intelligence__MTAG_EUR	0	0	0	0	0	EBNA2_gain_loop	chr1	32107608	32111695	loop_104
chr1	32110813	32110813	rs7542583	Body_mass_index_EUR,Intelligence__MTAG_EUR	0	0	0	0	0	EBNA2_gain_loop	chr1	32107608	32111695	loop_104
chr1	36886364	36886364	rs2275478	Neutrophil_count_EAS	0	0	1	0	0	EBNA2_gain_loop	chr1	36885814	36889779	loop_125
chr1	36887163	36887163	rs2282353	Neutrophil_count_EAS	0	0	1	0	0	EBNA2_gain_loop	chr1	36885814	36889779	loop_125
chr1	36887702	36887702	rs2236565	Neutrophil_count_EAS	0	0	1	0	0	EBNA2_gain_loop	chr1	36885814	36889779	loop_125
chr1	36889197	36889197	rs11263892	Neutrophil_count_EAS	0	0	1	0	0	EBNA2_gain_loop	chr1	36885814	36889779	loop_125
chr1	41708099	41708099	rs1121866	Height_EUR	0	0	0	0	0	EBNA2_up_genes	chr1	41707314	41708314	SCMH1
chr1	43418056	43418056	rs3216016	Monocyte_count_EUR	0	0	1	0	0	EBNA2_gain_loop	chr1	43417851	43420416	loop_147
chr1	43419091	43419091	rs3754223	Red_cell_distribution_width_EUR	0	0	0	0	0	EBNA2_gain_loop	chr1	43417851	43420416	loop_147
chr1	43419705	43419705	rs17387886	Monocyte_count_EUR	0	0	1	0	0	EBNA2_gain_loop	chr1	43417851	43420416	loop_147
chr1	44299216	44299216	rs77810956	Blood_protein_levels_EUR	0	0	0	0	0	EBNA2_gain_loop	chr1	44299000	44303151	loop_149
chr1	44299574	44299574	rs72886894	Blood_protein_levels_EUR	0	0	0	0	0	EBNA2_gain_loop	chr1	44299000	44303151	loop_149
chr1	44299592	44299592	rs72886895	Blood_protein_levels_EUR	0	0	0	0	0	EBNA2_gain_loop	chr1	44299000	44303151	loop_149
chr1	44299695	44299695	rs246774	General_cognitive_ability_EUR,Intelligence_EUR,Intelligence__MTAG_EUR	0	0	0	0	0	EBNA2_gain_loop	chr1	44299000	44303151	loop_149
chr1	44300249	44300249	rs246773	General_cognitive_ability_EUR,Intelligence_EUR,Intelligence__MTAG_EUR	0	0	0	0	0	EBNA2_gain_loop	chr1	44299000	44303151	loop_149
chr1	44302312	44302312	rs72886898	Blood_protein_levels_EUR	0	0	0	0	0	EBNA2_gain_loop	chr1	44299000	44303151	loop_149
chr1	44302647	44302647	rs11310494	General_cognitive_ability_EUR,Intelligence_EUR,Intelligence__MTAG_EUR	0	0	0	0	0	EBNA2_gain_loop	chr1	44299000	44303151	loop_149
chr1	44303025	44303025	rs3838470	General_cognitive_ability_EUR,Intelligence_EUR,Intelligence__MTAG_EUR	0	0	0	0	0	EBNA2_gain_loop	chr1	44299000	44303151	loop_149
chr1	45826272	45826272	rs112407805	Educational_attainment__MTAG_EUR,Platelet_count_EUR,Platelet_distribution_width_EUR	0	0	0	0	0	EBNA2_gain_loop	chr1	45825007	45826727	loop_160
chr1	45859332	45859332	rs7536135	Educational_attainment__MTAG_EUR,Educational_attainment__years_of_education_EUR,Platelet_count_EUR,Platelet_distribution_width_EUR	0	0	0	0	0	EBNA2_gain_loop	chr1	45858014	45861671	loop_162
chr1	45859343	45859343	rs7525849	Educational_attainment__MTAG_EUR,Educational_attainment__years_of_education_EUR,Platelet_count_EUR,Platelet_distribution_width_EUR	0	0	0	0	0	EBNA2_gain_loop	chr1	45858014	45861671	loop_162
chr1	45860313	45860313	rs142204641	Educational_attainment__MTAG_EUR,Educational_attainment__years_of_education_EUR,Platelet_count_EUR,Platelet_distribution_width_EUR	0	0	0	0	0	EBNA2_gain_loop	chr1	45858014	45861671	loop_162
chr1	45964238	45964238	rs7543076	Homocysteine_levels_EUR	0	0	0	0	0	EBNA2_gain_loop	chr1	45964042	45967345	loop_157
chr1	45965307	45965307	rs12568144	Pulse_pressure_AMR,High_light_scatter_reticulocyte_count_EUR	0	0	0	0	0	EBNA2_gain_loop	chr1	45964042	45967345	loop_157
chr1	45965340	45965340	rs7546268	Homocysteine_levels_EUR	0	0	0	0	0	EBNA2_gain_loop	chr1	45964042	45967345	loop_157
chr1	45965703	45965703	rs3748643	Homocysteine_levels_EUR	0	0	0	0	0	EBNA2_gain_loop	chr1	45964042	45967345	loop_157
chr1	45966298	45966298	rs12042903	Educational_attainment__MTAG_EUR,Educational_attainment__years_of_education_EUR,Platelet_distribution_width_EUR	0	0	0	0	0	EBNA2_gain_loop	chr1	45964042	45967345	loop_157
chr1	45966582	45966582	rs4660864	Homocysteine_levels_EUR	0	0	0	0	0	EBNA2_gain_loop	chr1	45964042	45967345	loop_157
chr1	45986484	45986484	rs4660867	Homocysteine_levels_EUR	0	0	0	0	0	EBNA2_gain_loop	chr1	45986346	45988911	loop_163
chr1	45986497	45986497	rs4660868	Homocysteine_levels_EUR	0	0	0	0	0	EBNA2_gain_loop	chr1	45986346	45988911	loop_163
chr1	45986670	45986670	rs2152077	Homocysteine_levels_EUR	0	0	0	0	0	EBNA2_gain_loop	chr1	45986346	45988911	loop_163
chr1	45986852	45986852	rs11211130	Pulse_pressure_AMR,High_light_scatter_reticulocyte_count_EUR	0	0	0	0	0	EBNA2_gain_loop	chr1	45986346	45988911	loop_163
chr1	45988115	45988115	rs2077808	Homocysteine_levels_EUR	0	0	0	0	0	EBNA2_gain_loop	chr1	45986346	45988911	loop_163
chr1	45988267	45988267	rs713358	Educational_attainment__MTAG_EUR,Educational_attainment__years_of_education_EUR,Platelet_distribution_width_EUR	0	0	0	0	0	EBNA2_gain_loop	chr1	45986346	45988911	loop_163
chr1	45988691	45988691	rs7534467	Homocysteine_levels_EUR	0	0	0	0	0	EBNA2_gain_loop	chr1	45986346	45988911	loop_163
chr1	45988764	45988764	rs12133294	Pulse_pressure_AMR,High_light_scatter_reticulocyte_count_EUR	0	0	0	0	0	EBNA2_gain_loop	chr1	45986346	45988911	loop_163
chr1	46008538	46008538	rs66922050	Pulse_pressure_AMR,High_light_scatter_reticulocyte_count_EUR	0	0	0	0	0	EBNA2_gain_loop	chr1	46008490	46010297	loop_163
chr1	46008913	46008913	rs60608374	Pulse_pressure_AMR,High_light_scatter_reticulocyte_count_EUR	0	0	0	0	0	EBNA2_gain_loop	chr1	46008490	46010297	loop_163
chr1	46009313	46009313	rs2356553	Pulse_pressure_AFR,Pulse_pressure_AMR,Pulse_pressure_EAS,High_light_scatter_reticulocyte_count_EUR	0	0	0	0	0	EBNA2_gain_loop	chr1	46008490	46010297	loop_163
chr1	46009318	46009318	rs2356551	Pulse_pressure_AMR,High_light_scatter_reticulocyte_count_EUR	0	0	0	0	0	EBNA2_gain_loop	chr1	46008490	46010297	loop_163
chr1	46009818	46009818	rs868351	Educational_attainment__MTAG_EUR,Educational_attainment__years_of_education_EUR,Platelet_distribution_width_EUR	0	0	0	0	0	EBNA2_gain_loop	chr1	46008490	46010297	loop_163
chr1	46009946	46009946	rs512026	Pulse_pressure_AMR,High_light_scatter_reticulocyte_count_EUR	0	0	0	0	0	EBNA2_gain_loop	chr1	46008490	46010297	loop_163
chr1	46015157	46015157	rs11211138	Homocysteine_levels_EUR	0	0	0	0	0	EBNA2_gain_loop	chr1	46015094	46017602	loop_162
chr1	46015271	46015271	rs622798	Pulse_pressure_AFR,Pulse_pressure_AMR,Pulse_pressure_EAS,High_light_scatter_reticulocyte_count_EUR	0	0	0	0	0	EBNA2_gain_loop	chr1	46015094	46017602	loop_162
chr1	46015535	46015535	rs61467610	Pulse_pressure_AFR,Pulse_pressure_AMR,Pulse_pressure_EAS,High_light_scatter_reticulocyte_count_EUR	0	0	0	0	0	EBNA2_gain_loop	chr1	46015094	46017602	loop_162
chr1	46015751	46015751	rs11211139	Pulse_pressure_EAS,Educational_attainment__MTAG_EUR,Educational_attainment__years_of_education_EUR,Platelet_distribution_width_EUR	0	0	0	0	0	EBNA2_gain_loop	chr1	46015094	46017602	loop_162
chr1	46016687	46016687	rs9147	Pulse_pressure_AMR,Pulse_pressure_EAS,High_light_scatter_reticulocyte_count_EUR	0	0	0	0	0	EBNA2_gain_loop	chr1	46015094	46017602	loop_162
chr1	46153203	46153203	rs3013595	Platelet_count_EAS,Body_mass_index_EUR,Hemoglobin_concentration_EUR,Pulse_pressure_EUR,White_blood_cell_count_EUR	0	0	1	0	0	EBNA2_gain_loop	chr1	46150915	46154964	loop_165
chr1	46153548	46153548	rs11211163	Platelet_count_EAS	0	0	0	0	0	EBNA2_gain_loop	chr1	46150915	46154964	loop_165
chr1	46190854	46190854	chr1_46190854	Blood_metabolite_levels_EUR	0	0	0	0	0	EBNA2_closed_chromatin	chr1	46190559	46191018	230
chr1	46505054	46505054	rs7538978	Body_mass_index_EAS,Body_mass_index__joint_analysis_main_effects_and_physical_activity_interaction_EAS,Sodium_levels_EAS,Body_mass_index__joint_analysis_main_effects_and_physical_activity_interaction_EUR,Smoking_initiation__ever_regular_vs_never_regular_EUR,Smoking_initiation__ever_regular_vs_never_regular___MTAG_EUR	0	0	0	0	0	EBNA2_loss_loop	chr1	46504927	46510178	loop_8
chr1	46505147	46505147	rs1707322	Body_mass_index_AFR,Body_mass_index__joint_analysis_main_effects_and_physical_activity_interaction_AFR,Body_mass_index_EAS,Body_mass_index__joint_analysis_main_effects_and_physical_activity_interaction_EAS,Sodium_levels_EAS,Body_mass_index__joint_analysis_main_effects_and_physical_activity_interaction_EUR,Smoking_initiation__ever_regular_vs_never_regular_EUR,Smoking_initiation__ever_regular_vs_ne…	0	0	0	0	0	EBNA2_loss_loop	chr1	46504927	46510178	loop_8
chr1	46505309	46505309	rs1707321	Body_mass_index_EAS,Body_mass_index__joint_analysis_main_effects_and_physical_activity_interaction_EAS,Sodium_levels_EAS,Body_mass_index_EUR,Red_blood_cell_count_EUR,Reticulocyte_count_EUR,White_blood_cell_count_EUR	0	0	1	0	0	EBNA2_loss_loop	chr1	46504927	46510178	loop_8
chr1	46505577	46505577	rs72463289	Body_mass_index_EAS,Body_mass_index__joint_analysis_main_effects_and_physical_activity_interaction_EAS,Sodium_levels_EAS,Body_mass_index_EUR,Red_blood_cell_count_EUR,Reticulocyte_count_EUR,White_blood_cell_count_EUR	0	0	1	0	0	EBNA2_loss_loop	chr1	46504927	46510178	loop_8
chr1	46505589	46505589	rs11444102	Body_mass_index_AFR,Body_mass_index__joint_analysis_main_effects_and_physical_activity_interaction_AFR,Body_mass_index_EAS,Body_mass_index__joint_analysis_main_effects_and_physical_activity_interaction_EAS,Sodium_levels_EAS,Body_mass_index__joint_analysis_main_effects_and_physical_activity_interaction_EUR,Smoking_initiation__ever_regular_vs_never_regular_EUR,Smoking_initiation__ever_regular_vs_ne…	0	0	0	0	0	EBNA2_loss_loop	chr1	46504927	46510178	loop_8
chr1	46505785	46505785	rs71062735	Body_mass_index_AFR,Body_mass_index__joint_analysis_main_effects_and_physical_activity_interaction_AFR,Body_mass_index_EAS,Body_mass_index__joint_analysis_main_effects_and_physical_activity_interaction_EAS,Sodium_levels_EAS,Body_mass_index__joint_analysis_main_effects_and_physical_activity_interaction_EUR,Smoking_initiation__ever_regular_vs_never_regular_EUR,Smoking_initiation__ever_regular_vs_ne…	0	0	0	0	0	EBNA2_loss_loop	chr1	46504927	46510178	loop_8
chr1	46508769	46508769	rs1707337	Body_mass_index_AFR,Body_mass_index__joint_analysis_main_effects_and_physical_activity_interaction_AFR,Body_mass_index_EAS,Body_mass_index__joint_analysis_main_effects_and_physical_activity_interaction_EAS,Sodium_levels_EAS,Body_mass_index__joint_analysis_main_effects_and_physical_activity_interaction_EUR,Smoking_initiation__ever_regular_vs_never_regular_EUR,Smoking_initiation__ever_regular_vs_ne…	0	0	0	0	0	EBNA2_loss_loop	chr1	46504927	46510178	loop_8
chr1	47817529	47817529	rs115516736	Corneal_curvature_EAS	0	0	0	0	0	EBNA2_gain_loop	chr1	47816530	47818012	loop_166
chr1	51443389	51443389	rs116475050	Pulse_pressure_AFR,Pulse_pressure_AMR,Pulse_pressure_EAS,Triglycerides_EAS,Hip_circumference_EUR,Hip_circumference_adjusted_for_BMI_EUR,Pulse_pressure_EUR,Triglycerides_EUR,Type_2_diabetes_EUR	0	0	1	0	0	EBNA2_open_Chromatin	chr1	51443213	51444254	509
chr1	51443441	51443441	rs1341982	Highest_math_class_taken_EUR,QRS_duration_EUR	0	0	0	0	0	EBNA2_open_Chromatin	chr1	51443213	51444254	509
chr1	54204835	54204835	rs797904	Male_pattern_baldness_EUR	0	0	0	0	0	EBNA2_closed_chromatin	chr1	54204643	54205167	336
chr1	54204835	54204835	rs797904	Male_pattern_baldness_EUR	0	0	0	0	0	EBNA2_closed_chromatin	chr1	54204763	54205167	336
chr1	54204899	54204899	chr1_54204899	Male_pattern_baldness_EUR	0	0	0	0	0	EBNA2_closed_chromatin	chr1	54204643	54205167	336
chr1	54204899	54204899	chr1_54204899	Male_pattern_baldness_EUR	0	0	0	0	0	EBNA2_closed_chromatin	chr1	54204763	54205167	336
chr1	72748669	72748669	rs3101339	BMI__adjusted_for_smoking_behaviour_AMR,BMI_in_non_smokers_AMR,BMI_in_smokers_AMR,Body_mass_index_AMR,Body_mass_index__joint_analysis_main_effects_and_smoking_interaction_AMR,BMI__adjusted_for_smoking_behaviour_EAS,BMI_in_non_smokers_EAS,BMI_in_smokers_EAS,Body_mass_index_EAS,Body_mass_index__joint_analysis_main_effects_and_physical_activity_interaction_EAS,Body_mass_index__joint_analysis_main_ef…	0	0	1	1	0	EBNA2_open_Chromatin	chr1	72748385	72749049	319
chr1	74663709	74663709	rs11806946	Educational_attainment__years_of_education_EUR	0	0	0	0	0	EBNA2_open_Chromatin	chr1	74663634	74664278	391
chr1	74663814	74663814	rs1412825	Educational_attainment__years_of_education_EUR	0	0	0	0	0	EBNA2_open_Chromatin	chr1	74663634	74664278	391
chr1	74664149	74664149	rs4422957	Educational_attainment__years_of_education_EUR	0	0	0	0	0	EBNA2_open_Chromatin	chr1	74663634	74664278	391
chr1	75198740	75198740	rs2345436	Educational_attainment__years_of_education_EUR	0	0	0	0	0	EBNA2_open_Chromatin	chr1	75198256	75199245	595
chr1	75199214	75199214	rs745108	Blood_protein_levels_EUR	0	0	0	0	0	EBNA2_open_Chromatin	chr1	75198256	75199245	595
chr1	75199299	75199299	rs28568334	Educational_attainment__years_of_education_EUR	0	0	0	0	0	EBNA2_open_Chromatin	chr1	75199286	75199679	230
chr1	75199615	75199615	rs60292279	Blood_protein_levels_EUR	0	0	0	0	0	EBNA2_open_Chromatin	chr1	75199286	75199679	230
chr1	75199659	75199659	rs61135741	Blood_protein_levels_EUR	0	0	0	0	0	EBNA2_open_Chromatin	chr1	75199286	75199679	230
chr1	85528006	85528006	rs12034421	Blond_vs__brown_black_hair_color_EUR	0	0	0	0	0	EBNA2_up_genes	chr1	85527480	85528480	WDR63
chr1	90157457	90157457	rs7544575	Heel_bone_mineral_density_EUR	0	0	0	0	0	EBNA2_gain_loop	chr1	90156940	90160080	loop_180
chr1	90157644	90157644	rs7552479	Heel_bone_mineral_density_EUR	0	0	0	0	0	EBNA2_gain_loop	chr1	90156940	90160080	loop_180
chr1	90158592	90158592	rs1343778	Diastolic_blood_pressure_EUR	0	0	0	0	0	EBNA2_gain_loop	chr1	90156940	90160080	loop_180
chr1	90158719	90158719	rs1343779	Diastolic_blood_pressure_EUR	0	0	0	0	0	EBNA2_gain_loop	chr1	90156940	90160080	loop_180
chr1	92952861	92952861	rs7536295	Low_density_lipoprotein_cholesterol_levels_AFR,Total_cholesterol_levels_AFR,Low_density_lipoprotein_cholesterol_levels_AMR,Total_cholesterol_levels_AMR,Low_density_lipoprotein_cholesterol_levels_EAS,Total_cholesterol_levels_EAS,Cholesterol__total_EUR,LDL_cholesterol_EUR,Low_density_lipoprotein_cholesterol_levels_EUR,Monocyte_count_EUR,Total_cholesterol_levels_EUR	0	0	1	0	0	EBNA2_up_genes	chr1	92951932	92952932	GFI1
chr1	93459069	93459069	rs35807969	Height_EUR	0	0	0	0	0	EBNA2_gain_loop	chr1	93457386	93459994	loop_182
chr1	93644410	93644410	rs7553465	HDL_cholesterol_AMR,HDL_cholesterol_x_physical_activity_interaction__2df_test_AMR,HDL_cholesterol_x_physical_activity_interaction__2df_test_EAS,High_density_lipoprotein_cholesterol_levels_EAS,Triglyceride_levels_EAS,Educational_attainment__MTAG_EUR,Educational_attainment__years_of_education_EUR,Eosinophil_counts_EUR,Eosinophil_percentage_of_granulocytes_EUR,Eosinophil_percentage_of_white_cells_EU…	0	0	1	0	0	EBNA2_gain_loop	chr1	93643890	93647409	loop_183
chr1	93644738	93644738	rs2783496	High_density_lipoprotein_cholesterol_levels_EAS	0	0	0	0	0	EBNA2_gain_loop	chr1	93643890	93647409	loop_183
chr1	93644843	93644843	rs7553916	HDL_cholesterol_AMR,HDL_cholesterol_x_physical_activity_interaction__2df_test_AMR,HDL_cholesterol_x_physical_activity_interaction__2df_test_EAS,High_density_lipoprotein_cholesterol_levels_EAS,Triglyceride_levels_EAS,Educational_attainment__MTAG_EUR,Educational_attainment__years_of_education_EUR,Eosinophil_counts_EUR,Eosinophil_percentage_of_granulocytes_EUR,Eosinophil_percentage_of_white_cells_EU…	0	0	1	0	0	EBNA2_gain_loop	chr1	93643890	93647409	loop_183
chr1	93644849	93644849	rs2783497	High_density_lipoprotein_cholesterol_levels_EAS	0	0	0	0	0	EBNA2_gain_loop	chr1	93643890	93647409	loop_183
chr1	93645182	93645182	rs1335679	HDL_cholesterol_AMR,HDL_cholesterol_x_physical_activity_interaction__2df_test_AMR,HDL_cholesterol_x_physical_activity_interaction__2df_test_EAS,High_density_lipoprotein_cholesterol_levels_EAS,Triglyceride_levels_EAS,Educational_attainment__MTAG_EUR,Educational_attainment__years_of_education_EUR,Eosinophil_counts_EUR,Eosinophil_percentage_of_granulocytes_EUR,Eosinophil_percentage_of_white_cells_EU…	0	0	1	0	0	EBNA2_gain_loop	chr1	93643890	93647409	loop_183
chr1	93646207	93646207	rs2297707	HDL_cholesterol_AMR,HDL_cholesterol_x_physical_activity_interaction__2df_test_AMR,HDL_cholesterol_x_physical_activity_interaction__2df_test_EAS,High_density_lipoprotein_cholesterol_levels_EAS,Triglyceride_levels_EAS,Educational_attainment__MTAG_EUR,Educational_attainment__years_of_education_EUR,Eosinophil_counts_EUR,Eosinophil_percentage_of_granulocytes_EUR,Eosinophil_percentage_of_white_cells_EU…	0	0	1	0	0	EBNA2_gain_loop	chr1	93643890	93647409	loop_183
chr1	93646433	93646433	rs2255722	High_density_lipoprotein_cholesterol_levels_EAS	0	0	0	0	0	EBNA2_gain_loop	chr1	93643890	93647409	loop_183
chr1	107684314	107684314	chr1_107684314	Shingles_EAS	0	0	1	0	0	EBNA2_open_Chromatin	chr1	107683479	107684411	562
chr1	108743059	108743059	rs663045	Granulocyte_count_EUR,Granulocyte_percentage_of_myeloid_white_cells_EUR,Monocyte_percentage_of_white_cells_EUR,Neutrophil_count_EUR,Sum_basophil_neutrophil_counts_EUR,Sum_neutrophil_eosinophil_counts_EUR,White_blood_cell_count_EUR	0	0	1	0	0	EBNA2_closed_chromatin	chr1	108742691	108743277	548
chr1	108743059	108743059	rs663045	Granulocyte_count_EUR,Granulocyte_percentage_of_myeloid_white_cells_EUR,Monocyte_percentage_of_white_cells_EUR,Neutrophil_count_EUR,Sum_basophil_neutrophil_counts_EUR,Sum_neutrophil_eosinophil_counts_EUR,White_blood_cell_count_EUR	0	0	1	0	0	EBNA2_closed_chromatin	chr1	108742457	108743165	548
chr1	108743059	108743059	rs663045	Granulocyte_count_EUR,Granulocyte_percentage_of_myeloid_white_cells_EUR,Monocyte_percentage_of_white_cells_EUR,Neutrophil_count_EUR,Sum_basophil_neutrophil_counts_EUR,Sum_neutrophil_eosinophil_counts_EUR,White_blood_cell_count_EUR	0	0	1	0	0	EBNA2_down_genes	chr1	108742479	108743479	SLC25A24
chr1	112145503	112145503	rs12045658	Educational_attainment__MTAG_EUR,Educational_attainment__years_of_education_EUR	0	0	0	0	0	EBNA2_gain_loop	chr1	112142064	112147566	loop_200
chr1	112280990	112280990	rs197439	Educational_attainment__MTAG_EUR	0	0	0	0	0	EBNA2_gain_loop	chr1	112280665	112283370	loop_200
chr1	113258293	113258293	rs12736457	Estimated_glomerular_filtration_rate_AFR,Estimated_glomerular_filtration_rate_AMR,Estimated_glomerular_filtration_rate_EAS,Estimated_glomerular_filtration_rate_EUR	0	0	0	0	0	EBNA2_up_genes	chr1	113257449	113258449	PPM1J
chr1	113498283	113498283	rs41283088	Macular_thickness_EUR	0	0	0	0	0	EBNA2_gain_loop	chr1	113497297	113500648	loop_201
chr1	113498284	113498284	rs72683452	Macular_thickness_EUR	0	0	0	0	0	EBNA2_gain_loop	chr1	113497297	113500648	loop_201
chr1	114303808	114303808	rs6679677	Systemic_lupus_erythematosus_AMR,Antineutrophil_cytoplasmic_antibody_associated_vasculitis_EUR,Chronic_inflammatory_diseases__ankylosing_spondylitis__Crohn_s_disease__psoriasis__primary_sclerosing_cholangitis__ulcerative_colitis___pleiotropy_EUR,Crohn_s_disease_EUR,Granulocyte_count_EUR,Hypothyroidism_EUR,Juvenile_idiopathic_arthritis__oligoarticular_or_rheumatoid_factor_negative_polyarticular_EU…	1	1	1	0	1	EBNA2_gain_loop	chr1	114301014	114303819	loop_202
chr1	145588184	145588184	rs2004659	Breast_cancer_EUR,Highest_math_class_taken__MTAG_EUR,Self_reported_math_ability__MTAG_EUR	0	0	0	0	0	EBNA2_gain_loop	chr1	145588096	145590623	loop_213
chr1	145588536	145588536	rs9286836	Breast_cancer_EUR,Highest_math_class_taken__MTAG_EUR,Self_reported_math_ability__MTAG_EUR	0	0	0	0	0	EBNA2_gain_loop	chr1	145588096	145590623	loop_213
chr1	150242340	150242340	rs34755378	HDL_cholesterol_AFR,Broad_depression_or_schizophrenia_EAS,Schizophrenia_EAS	0	0	0	0	0	EBNA2_gain_loop	chr1	150240144	150242818	loop_216
chr1	150242369	150242369	rs117595411	Schizophrenia_EAS	0	0	0	0	0	EBNA2_gain_loop	chr1	150240144	150242818	loop_216
chr1	150242604	150242604	rs72694993	Broad_depression_or_schizophrenia_EAS,Schizophrenia_EAS	0	0	0	0	0	EBNA2_gain_loop	chr1	150240144	150242818	loop_216
chr1	150534368	150534368	rs12116492	FEV1_EUR,Lung_function__FVC_EUR,Mouth_ulcers_EUR	0	0	0	0	0	EBNA2_gain_loop	chr1	150532724	150538059	loop_216
chr1	150536180	150536180	rs111358816	FEV1_EUR,Lung_function__FVC_EUR,Mouth_ulcers_EUR	0	0	0	0	0	EBNA2_gain_loop	chr1	150532724	150538059	loop_216
chr1	150537357	150537357	rs4971041	FEV1_EUR,Lung_function__FVC_EUR,Mouth_ulcers_EUR	0	0	0	0	0	EBNA2_gain_loop	chr1	150532724	150538059	loop_216
chr1	150537925	150537925	rs112883142	Broad_depression_or_schizophrenia_EAS,Schizophrenia_EAS,Eosinophil_counts_EUR,Sum_eosinophil_basophil_counts_EUR	0	0	1	0	0	EBNA2_gain_loop	chr1	150532724	150538059	loop_216
chr1	151763246	151763246	rs3811414	Coronary_artery_disease__myocardial_infarction__percutaneous_transluminal_coronary_angioplasty__coronary_artery_bypass_grafting__angina_or_chromic_ischemic_heart_disease_EUR,Insomnia_symptoms__never_rarely_vs__usually_EUR	0	0	0	0	0	EBNA2_down_genes	chr1	151762509	151763509	TDRKH
chr1	153517519	153517519	rs11488669	Pulse_pressure_AMR,Pulse_pressure_EAS,Blood_protein_levels_EUR,Pulse_pressure_EUR	0	0	0	0	0	EBNA2_open_Chromatin	chr1	153517488	153518010	262
chr1	153518483	153518483	rs56043239	Pulse_pressure_AMR,Pulse_pressure_EAS,Blood_protein_levels_EUR,Pulse_pressure_EUR	0	0	0	0	0	EBNA2_up_genes	chr1	153517781	153518781	S100A4
chr1	154834183	154834183	rs1218582	Prostate_cancer_EUR	0	0	0	0	0	EBNA2_gain_loop	chr1	154831422	154838709	loop_230
chr1	154836444	154836444	rs79810698	Waist_to_hip_ratio_adjusted_for_BMI__additive_genetic_model_AFR	0	0	0	0	0	EBNA2_gain_loop	chr1	154831422	154838709	loop_230
chr1	154837796	154837796	rs7553195	Atrial_fibrillation_EAS	0	0	0	0	0	EBNA2_gain_loop	chr1	154831422	154838709	loop_230
chr1	154838050	154838050	rs4845677	Atrial_fibrillation_EAS	0	0	0	0	0	EBNA2_gain_loop	chr1	154831422	154838709	loop_230
chr1	154849260	154849260	rs35629379	Atrial_fibrillation_EAS	0	0	0	0	0	EBNA2_gain_loop	chr1	154847573	154851037	loop_230
chr1	154849479	154849479	rs10796934	Atrial_fibrillation_EAS	0	0	0	0	0	EBNA2_gain_loop	chr1	154847573	154851037	loop_230
chr1	154849590	154849590	rs10908445	Atrial_fibrillation_EAS	0	0	0	0	0	EBNA2_gain_loop	chr1	154847573	154851037	loop_230
chr1	154849771	154849771	rs12069356	Atrial_fibrillation_EAS	0	0	0	0	0	EBNA2_gain_loop	chr1	154847573	154851037	loop_230
chr1	154850445	154850445	rs12144978	Atrial_fibrillation_EAS	0	0	0	0	0	EBNA2_gain_loop	chr1	154847573	154851037	loop_230
chr1	154913404	154913404	rs6686873	Atrial_fibrillation_EAS	0	0	0	0	0	EBNA2_gain_loop	chr1	154913098	154916939	loop_232
chr1	154914797	154914797	rs11264291	Atrial_fibrillation_EAS	0	0	0	0	0	EBNA2_gain_loop	chr1	154913098	154916939	loop_232
chr1	154915977	154915977	rs2335408	Atrial_fibrillation_EAS	0	0	0	0	0	EBNA2_gain_loop	chr1	154913098	154916939	loop_232
chr1	154916068	154916068	rs2102423	Atrial_fibrillation_EAS	0	0	0	0	0	EBNA2_gain_loop	chr1	154913098	154916939	loop_232
chr1	154916106	154916106	rs2335409	Atrial_fibrillation_EAS	0	0	0	0	0	EBNA2_gain_loop	chr1	154913098	154916939	loop_232
chr1	154934963	154934963	rs3766920	Eosinophil_counts_EAS,Inflammatory_bowel_disease_EAS	0	0	1	0	1	EBNA2_gain_loop	chr1	154933156	154936276	loop_234
chr1	154948327	154948327	rs12087657	Atrial_fibrillation_AFR	0	0	0	0	0	EBNA2_gain_loop	chr1	154944671	154949651	loop_234
chr1	154988255	154988255	rs71628639	Parkinson_s_disease_EUR	0	0	0	0	0	EBNA2_gain_loop	chr1	154988194	154991324	loop_232
chr1	154988533	154988533	rs77548871	Waist_to_hip_ratio_adjusted_for_BMI__additive_genetic_model_AFR	0	0	0	0	0	EBNA2_gain_loop	chr1	154988194	154991324	loop_232
chr1	154989823	154989823	chr1_154989823	Fat_free_mass_EUR,Waist_to_hip_ratio_adjusted_for_BMI_EUR,Waist_to_hip_ratio_adjusted_for_BMI_x_sex_x_age_interaction__4df_test_EUR,Waist_to_hip_ratio_adjusted_for_body_mass_index_EUR	0	0	0	0	0	EBNA2_gain_loop	chr1	154988194	154991324	loop_232
chr1	155106227	155106227	rs4745	Liver_enzyme_levels__gamma_glutamyl_transferase_EAS,Chronic_inflammatory_diseases__ankylosing_spondylitis__Crohn_s_disease__psoriasis__primary_sclerosing_cholangitis__ulcerative_colitis___pleiotropy_EUR,PR_interval_EUR	1	1	1	0	1	EBNA2_gain_loop	chr1	155106179	155109169	loop_236
chr1	155106550	155106550	rs9297	Liver_enzyme_levels__gamma_glutamyl_transferase_EAS,Liver_enzyme_levels__gamma_glutamyl_transferase_EUR,Urinary_albumin_excretion_EUR	0	0	0	0	0	EBNA2_gain_loop	chr1	155106179	155109169	loop_236
chr1	155106697	155106697	rs12904	Liver_enzyme_levels__gamma_glutamyl_transferase_EAS,Liver_enzyme_levels__gamma_glutamyl_transferase_EUR,Urinary_albumin_excretion_EUR	0	0	0	0	0	EBNA2_gain_loop	chr1	155106179	155109169	loop_236
chr1	155108167	155108167	rs12726330	Parkinson_s_disease_EUR	0	0	0	0	0	EBNA2_gain_loop	chr1	155106179	155109169	loop_236
chr1	155108287	155108287	rs11264333	Liver_enzyme_levels__gamma_glutamyl_transferase_EAS,Liver_enzyme_levels__gamma_glutamyl_transferase_EUR,Urinary_albumin_excretion_EUR	0	0	0	0	0	EBNA2_gain_loop	chr1	155106179	155109169	loop_236
chr1	155139509	155139509	rs7556304	Diastolic_blood_pressure_EAS,Liver_enzyme_levels__gamma_glutamyl_transferase_EAS,Serum_uric_acid_levels_EAS,Chronic_inflammatory_diseases__ankylosing_spondylitis__Crohn_s_disease__psoriasis__primary_sclerosing_cholangitis__ulcerative_colitis___pleiotropy_EUR,PR_interval_EUR	1	1	1	0	1	EBNA2_gain_loop	chr1	155138824	155140975	loop_237
chr1	155140648	155140648	rs11264339	Diastolic_blood_pressure_EAS,Liver_enzyme_levels__gamma_glutamyl_transferase_EAS,Mean_arterial_pressure_EAS,Renal_function_related_traits__BUN_EAS,Serum_uric_acid_levels_EAS,Systolic_blood_pressure_EAS,Chronic_inflammatory_diseases__ankylosing_spondylitis__Crohn_s_disease__psoriasis__primary_sclerosing_cholangitis__ulcerative_colitis___pleiotropy_EUR,PR_interval_EUR	1	1	1	0	1	EBNA2_gain_loop	chr1	155138824	155140975	loop_237
chr1	155157635	155157635	rs4971101	Estimated_glomerular_filtration_rate_AMR,Creatinine_levels_EAS,Diastolic_blood_pressure_EAS,Estimated_glomerular_filtration_rate_EAS,Gastric_cancer_EAS,Glomerular_filtration_rate_EAS,Mean_arterial_pressure_EAS,Renal_function_related_traits__BUN_EAS,Serum_uric_acid_levels_EAS,Systolic_blood_pressure_EAS,Estimated_glomerular_filtration_rate_EUR,Serum_uric_acid_levels_EUR,Urate_levels_EUR	0	0	0	0	0	EBNA2_gain_loop	chr1	155156365	155159454	loop_240
chr1	155157715	155157715	rs2070803	Estimated_glomerular_filtration_rate_AFR,Estimated_glomerular_filtration_rate_AMR,Creatinine_levels_EAS,Diastolic_blood_pressure_EAS,Estimated_glomerular_filtration_rate_EAS,Gastric_cancer_EAS,Glomerular_filtration_rate_EAS,Mean_arterial_pressure_EAS,Renal_function_related_traits__BUN_EAS,Serum_uric_acid_levels_EAS,Systolic_blood_pressure_EAS,Estimated_glomerular_filtration_rate_EUR,Serum_uric_ac…	0	0	0	0	0	EBNA2_gain_loop	chr1	155156365	155159454	loop_240
chr1	155161168	155161168	rs12743084	Blood_urea_nitrogen_levels_EAS,Diastolic_blood_pressure_EAS,Estimated_glomerular_filtration_rate_EAS,Gastric_cancer_EAS,Mean_arterial_pressure_EAS,Renal_function_related_traits__BUN_EAS,Serum_uric_acid_levels_EAS,Systolic_blood_pressure_EAS,Heel_bone_mineral_density_EUR,Magnesium_levels_EUR	0	0	0	0	0	EBNA2_closed_chromatin	chr1	155161130	155161640	323
chr1	155196717	155196717	rs2974930	Blood_urea_nitrogen_levels_EAS,Diastolic_blood_pressure_EAS,Estimated_glomerular_filtration_rate_EAS,Gastric_cancer_EAS,Mean_arterial_pressure_EAS,Renal_function_related_traits__BUN_EAS,Serum_uric_acid_levels_EAS,Systolic_blood_pressure_EAS,Heel_bone_mineral_density_EUR,Magnesium_levels_EUR	0	0	0	0	0	EBNA2_gain_loop	chr1	155196031	155198978	loop_238
chr1	155197268	155197268	rs2974929	Blood_urea_nitrogen_levels_EAS,Creatinine_levels_EAS,Diastolic_blood_pressure_EAS,Glomerular_filtration_rate_EAS,Mean_arterial_pressure_EAS,Renal_function_related_traits__BUN_EAS,Serum_uric_acid_levels_EAS,Systolic_blood_pressure_EAS,Heel_bone_mineral_density_EUR,Magnesium_levels_EUR	0	0	0	0	0	EBNA2_gain_loop	chr1	155196031	155198978	loop_238
chr1	155197462	155197462	rs2990245	Blood_urea_nitrogen_levels_EAS,Diastolic_blood_pressure_EAS,Estimated_glomerular_filtration_rate_EAS,Gastric_cancer_EAS,Mean_arterial_pressure_EAS,Renal_function_related_traits__BUN_EAS,Serum_uric_acid_levels_EAS,Systolic_blood_pressure_EAS,Heel_bone_mineral_density_EUR,Magnesium_levels_EUR	0	0	0	0	0	EBNA2_gain_loop	chr1	155196031	155198978	loop_238
chr1	155197602	155197602	rs2990246	Blood_urea_nitrogen_levels_EAS,Creatinine_levels_EAS,Estimated_glomerular_filtration_rate_EAS,Gastric_cancer_EAS,Glomerular_filtration_rate_EAS	0	0	0	0	0	EBNA2_gain_loop	chr1	155196031	155198978	loop_238
chr1	155230705	155230705	rs60762712	Adventurousness_EUR,Breast_cancer_EUR	0	0	0	0	0	EBNA2_gain_loop	chr1	155230472	155233003	loop_241
chr1	155231545	155231545	rs2242576	Adventurousness_EUR,Breast_cancer_EUR	0	0	0	0	0	EBNA2_gain_loop	chr1	155230472	155233003	loop_241
chr1	155232074	155232074	rs1046188	Adventurousness_EUR,Breast_cancer_EUR	0	0	0	0	0	EBNA2_gain_loop	chr1	155230472	155233003	loop_241
chr1	155266335	155266335	rs8177968	Adventurousness_EUR,Breast_cancer_EUR	0	0	0	0	0	EBNA2_gain_loop	chr1	155265691	155268355	loop_242
chr1	155268120	155268120	rs12067675	Adventurousness_EUR,Breast_cancer_EUR	0	0	0	0	0	EBNA2_gain_loop	chr1	155265691	155268355	loop_242
chr1	155268131	155268131	rs180921974	Body_fat_distribution__leg_fat_ratio_EUR,Body_fat_distribution__trunk_fat_ratio_EUR	0	0	0	0	0	EBNA2_gain_loop	chr1	155265691	155268355	loop_242
chr1	155827546	155827546	rs7556519	Body_mass_index_EAS	0	0	0	0	0	EBNA2_gain_loop	chr1	155826081	155831439	loop_245
chr1	155829511	155829511	rs3820594	Body_mass_index_EAS	0	0	0	0	0	EBNA2_gain_loop	chr1	155826081	155831439	loop_245
chr1	156458840	156458840	rs3790457	Resting_heart_rate_EAS,Headache_EUR,Migraine_EUR,Platelet_count_EUR,Plateletcrit_EUR	0	0	0	0	0	EBNA2_gain_loop	chr1	156457657	156465293	loop_249
chr1	156459535	156459535	rs12038396	Resting_heart_rate_EAS,Headache_EUR,Migraine_EUR,Platelet_count_EUR,Plateletcrit_EUR	0	0	0	0	0	EBNA2_gain_loop	chr1	156457657	156465293	loop_249
chr1	156459699	156459699	rs3790458	Resting_heart_rate_EAS,Resting_heart_rate_EUR	0	0	0	0	0	EBNA2_gain_loop	chr1	156457657	156465293	loop_249
chr1	156460511	156460511	rs746527	Resting_heart_rate_EAS,Resting_heart_rate_EUR	0	0	0	0	0	EBNA2_gain_loop	chr1	156457657	156465293	loop_249
chr1	156461707	156461707	rs3790459	Resting_heart_rate_EAS,Headache_EUR,Migraine_EUR,Platelet_count_EUR,Plateletcrit_EUR	0	0	0	0	0	EBNA2_gain_loop	chr1	156457657	156465293	loop_249
chr1	156464429	156464429	rs10908504	Resting_heart_rate_EAS,Headache_EUR,Migraine_EUR,Platelet_count_EUR,Plateletcrit_EUR	0	0	0	0	0	EBNA2_gain_loop	chr1	156457657	156465293	loop_249
chr1	156465029	156465029	rs3790460	Resting_heart_rate_AFR,Resting_heart_rate_EAS,Resting_heart_rate_EUR	0	0	0	0	0	EBNA2_gain_loop	chr1	156457657	156465293	loop_249
chr1	156720550	156720550	rs11264534	HDL_cholesterol_levels_EAS,Blood_protein_levels_EUR,HDL_cholesterol_EUR,HDL_cholesterol_levels_EUR	0	0	0	0	0	EBNA2_gain_loop	chr1	156719310	156723802	loop_249
chr1	156721032	156721032	rs12030654	HDL_cholesterol_levels_EAS,Blood_protein_levels_EUR,HDL_cholesterol_EUR,HDL_cholesterol_levels_EUR	0	0	0	0	0	EBNA2_gain_loop	chr1	156719310	156723802	loop_249
chr1	156722424	156722424	rs11264535	HDL_cholesterol_levels_EAS,Blood_protein_levels_EUR,HDL_cholesterol_EUR,HDL_cholesterol_levels_EUR	0	0	0	0	0	EBNA2_gain_loop	chr1	156719310	156723802	loop_249
chr1	157754040	157754040	rs7552368	Multiple_sclerosis_EUR	1	0	1	0	0	EBNA2_loss_loop	chr1	157750111	157756257	loop_14
chr1	157774897	157774897	rs6427403	Multiple_sclerosis_EUR	1	0	1	0	0	EBNA2_loss_loop	chr1	157774405	157779057	loop_15
chr1	157778634	157778634	rs7538531	Multiple_sclerosis_EUR	1	0	1	0	0	EBNA2_loss_loop	chr1	157774405	157779057	loop_15
chr1	157778689	157778689	rs56380612	Multiple_sclerosis_EUR	1	0	1	0	0	EBNA2_loss_loop	chr1	157774405	157779057	loop_15
chr1	157788270	157788270	rs11264825	Multiple_sclerosis_EUR	1	0	1	0	0	EBNA2_loss_loop	chr1	157788242	157791259	loop_15
chr1	157788448	157788448	rs10908595	Multiple_sclerosis_EUR	1	0	1	0	0	EBNA2_loss_loop	chr1	157788242	157791259	loop_15
chr1	157788521	157788521	rs10908597	Multiple_sclerosis_EUR	1	0	1	0	0	EBNA2_loss_loop	chr1	157788242	157791259	loop_15
chr1	157789087	157789087	rs34477150	Multiple_sclerosis_EUR	1	0	1	0	0	EBNA2_loss_loop	chr1	157788242	157791259	loop_15
chr1	159019515	159019515	rs56016614	Blood_protein_levels_EUR	0	0	0	0	0	EBNA2_loss_loop	chr1	159019168	159021327	loop_16
chr1	159019962	159019962	rs61533256	Blood_protein_levels_EUR	0	0	0	0	0	EBNA2_loss_loop	chr1	159019168	159021327	loop_16
chr1	159020142	159020142	rs72709548	Blood_protein_levels_EUR	0	0	0	0	0	EBNA2_loss_loop	chr1	159019168	159021327	loop_16
chr1	159020366	159020366	rs72709549	Blood_protein_levels_EUR	0	0	0	0	0	EBNA2_loss_loop	chr1	159019168	159021327	loop_16
chr1	160521019	160521019	rs11585158	Blood_protein_levels_EUR	0	0	0	0	0	EBNA2_gain_loop	chr1	160516911	160521436	loop_258
chr1	160620732	160620732	rs6696411	Itch_intensity_from_mosquito_bite_EUR	0	0	0	0	0	EBNA2_gain_loop	chr1	160620570	160624363	loop_276
chr1	161674216	161674216	rs202167899	Albumin_globulin_ratio_EAS,Non_albumin_protein_levels_EAS	0	0	0	0	0	EBNA2_gain_loop	chr1	161674172	161679159	loop_292
chr1	161674486	161674486	rs10917724	Albumin_globulin_ratio_EAS,Non_albumin_protein_levels_EAS	0	0	0	0	0	EBNA2_gain_loop	chr1	161674172	161679159	loop_292
chr1	161674587	161674587	rs66930627	Albumin_globulin_ratio_EAS,Non_albumin_protein_levels_EAS	0	0	0	0	0	EBNA2_gain_loop	chr1	161674172	161679159	loop_292
chr1	161696782	161696782	rs11585450	Non_albumin_protein_levels_EAS,White_blood_cell_count_EAS	0	0	1	0	0	EBNA2_gain_loop	chr1	161694615	161698200	loop_292
chr1	161696998	161696998	rs1875763	Non_albumin_protein_levels_EAS,White_blood_cell_count_EAS	0	0	1	0	0	EBNA2_gain_loop	chr1	161694615	161698200	loop_292
chr1	167178149	167178149	rs2173298	Diastolic_blood_pressure_EUR	0	0	0	0	0	EBNA2_open_Chromatin	chr1	167178010	167178616	369
chr1	167178161	167178161	rs10918666	Diastolic_blood_pressure_EUR	0	0	0	0	0	EBNA2_open_Chromatin	chr1	167178010	167178616	369
chr1	167326821	167326821	rs7524664	Diastolic_blood_pressure_EUR	0	0	0	0	0	EBNA2_loss_loop	chr1	167324975	167329725	loop_17
chr1	167327426	167327426	rs11810672	Diastolic_blood_pressure_EUR	0	0	0	0	0	EBNA2_loss_loop	chr1	167324975	167329725	loop_17
chr1	167329046	167329046	rs2140761	Diastolic_blood_pressure_EUR	0	0	0	0	0	EBNA2_loss_loop	chr1	167324975	167329725	loop_17
chr1	169075449	169075449	rs28362573	QT_interval_AMR,QT_interval_EUR	0	0	0	0	0	EBNA2_down_genes	chr1	169075446	169076446	ATP1B1
chr1	170501746	170501746	rs10919426	Male_pattern_baldness_EUR	0	0	0	0	0	EBNA2_open_Chromatin	chr1	170500721	170501788	539
chr1	174231956	174231956	rs77406062	Depressed_affect_EUR,Feeling_miserable_EUR	0	0	0	0	0	EBNA2_open_Chromatin	chr1	174231904	174232542	311
chr1	174232130	174232130	rs10912751	Depressed_affect_EUR,Experiencing_mood_swings_EUR,Neurociticism_EUR,Neuroticism_EUR	0	0	0	0	0	EBNA2_open_Chromatin	chr1	174231904	174232542	311
chr1	174242471	174242471	rs74128334	Depressed_affect_EUR,Feeling_miserable_EUR	0	0	0	0	0	EBNA2_gain_loop	chr1	174241346	174246802	loop_305
chr1	174242596	174242596	rs74128335	Depressed_affect_EUR,Feeling_miserable_EUR	0	0	0	0	0	EBNA2_gain_loop	chr1	174241346	174246802	loop_305
chr1	174242805	174242805	rs10912754	Depressed_affect_EUR,Experiencing_mood_swings_EUR,Neurociticism_EUR,Neuroticism_EUR	0	0	0	0	0	EBNA2_gain_loop	chr1	174241346	174246802	loop_305
chr1	174244620	174244620	rs58831567	Depressed_affect_EUR,Feeling_miserable_EUR	0	0	0	0	0	EBNA2_gain_loop	chr1	174241346	174246802	loop_305
chr1	174246137	174246137	rs61246604	Age_of_smoking_initiation__MTAG_EUR,Cigarettes_smoked_per_day__MTAG_EUR,Cognitive_performance__MTAG_EUR,Educational_attainment__MTAG_EUR,Educational_attainment__years_of_education_EUR,Highest_math_class_taken__MTAG_EUR,Smoking_cessation__MTAG_EUR,Smoking_initiation__ever_regular_vs_never_regular_EUR,Smoking_initiation__ever_regular_vs_never_regular___MTAG_EUR	0	0	0	0	0	EBNA2_gain_loop	chr1	174241346	174246802	loop_305
chr1	174246712	174246712	rs6670617	Age_of_smoking_initiation__MTAG_EUR,Cigarettes_smoked_per_day__MTAG_EUR,Cognitive_performance__MTAG_EUR,Educational_attainment__MTAG_EUR,Educational_attainment__years_of_education_EUR,Highest_math_class_taken__MTAG_EUR,Smoking_cessation__MTAG_EUR,Smoking_initiation__ever_regular_vs_never_regular_EUR,Smoking_initiation__ever_regular_vs_never_regular___MTAG_EUR	0	0	0	0	0	EBNA2_gain_loop	chr1	174241346	174246802	loop_305
chr1	174767759	174767759	rs5778812	Depressed_affect_EUR,Experiencing_mood_swings_EUR,Neurociticism_EUR,Neuroticism_EUR	0	0	0	0	0	EBNA2_gain_loop	chr1	174767326	174771520	loop_307
chr1	174769070	174769070	rs72717613	Depressed_affect_EUR	0	0	0	0	0	EBNA2_open_Chromatin	chr1	174768623	174769202	272
chr1	174769070	174769070	rs72717613	Depressed_affect_EUR	0	0	0	0	0	EBNA2_gain_loop	chr1	174767326	174771520	loop_307
chr1	174770191	174770191	rs2987874	Age_of_smoking_initiation__MTAG_EUR,Cigarettes_smoked_per_day__MTAG_EUR,Cognitive_performance__MTAG_EUR,Educational_attainment__MTAG_EUR,Educational_attainment__years_of_education_EUR,Highest_math_class_taken__MTAG_EUR,Smoking_cessation__MTAG_EUR,Smoking_initiation__ever_regular_vs_never_regular_EUR,Smoking_initiation__ever_regular_vs_never_regular___MTAG_EUR	0	0	0	0	0	EBNA2_gain_loop	chr1	174767326	174771520	loop_307
chr1	174770911	174770911	rs144052311	Feeling_tense_EUR	0	0	0	0	0	EBNA2_gain_loop	chr1	174767326	174771520	loop_307
chr1	174783859	174783859	rs145763993	Chronotype_EUR	0	0	0	0	0	EBNA2_gain_loop	chr1	174782758	174787238	loop_307
chr1	174784585	174784585	rs2860725	Depressed_affect_EUR,Experiencing_mood_swings_EUR,Neurociticism_EUR,Neuroticism_EUR	0	0	0	0	0	EBNA2_gain_loop	chr1	174782758	174787238	loop_307
chr1	174784652	174784652	rs72717617	Depressed_affect_EUR	0	0	0	0	0	EBNA2_gain_loop	chr1	174782758	174787238	loop_307
chr1	174785977	174785977	rs72717618	Depressed_affect_EUR,Experiencing_mood_swings_EUR,Neurociticism_EUR,Neuroticism_EUR	0	0	0	0	0	EBNA2_gain_loop	chr1	174782758	174787238	loop_307
chr1	174786334	174786334	rs1754354	Depressed_affect_EUR,Experiencing_mood_swings_EUR,Neurociticism_EUR,Neuroticism_EUR	0	0	0	0	0	EBNA2_gain_loop	chr1	174782758	174787238	loop_307
chr1	182558139	182558139	rs12743617	Chronotype_EUR,Ease_of_getting_up_in_the_morning_EUR,Morning_person_EUR,Morning_vs__evening_chronotype_EUR,Sleep_traits__multi_trait_analysis_EUR	0	0	0	0	0	EBNA2_gain_loop	chr1	182556886	182559646	loop_312
chr1	183040515	183040515	rs35812254	Colorectal_cancer_or_advanced_adenoma_EAS,Colorectal_cancer_EUR,Colorectal_cancer_or_advanced_adenoma_EUR	0	0	0	0	0	EBNA2_open_Chromatin	chr1	183039947	183040833	607
chr1	183040692	183040692	rs35870068	Total_cholesterol_levels_AMR,Total_cholesterol_levels_EAS,Total_cholesterol_levels_EUR	0	0	0	0	0	EBNA2_open_Chromatin	chr1	183039947	183040833	607
chr1	184020945	184020945	rs2274432	HDL_cholesterol_AFR,Waist_circumference_adjusted_for_BMI__adjusted_for_smoking_behaviour_AFR,Waist_circumference_adjusted_for_BMI__joint_analysis_main_effects_and_physical_activity_interaction_AFR,Waist_circumference_adjusted_for_BMI__joint_analysis_main_effects_and_smoking_interaction_AFR,Waist_circumference_adjusted_for_BMI_in_non_smokers_AFR,Waist_circumference_adjusted_for_body_mass_index_AFR…	0	0	0	0	0	EBNA2_open_Chromatin	chr1	184020403	184021360	500
chr1	196692672	196692672	rs381974	Advanced_age_related_macular_degeneration_EUR,Age_related_macular_degeneration__choroidal_neovascularisation_EUR,Blood_protein_levels_EUR,Disease_progression_in_age_related_macular_degeneration_EUR	0	0	0	0	0	EBNA2_open_Chromatin	chr1	196692519	196692981	185
chr1	197743506	197743506	rs1539414	Chronic_inflammatory_diseases__ankylosing_spondylitis__Crohn_s_disease__psoriasis__primary_sclerosing_cholangitis__ulcerative_colitis___pleiotropy_EUR,Crohn_s_disease_EUR,Depression_EUR,Depressive_symptoms_EUR,Depressive_symptoms__MTAG_EUR,Educational_attainment__MTAG_EUR,Feeling_hurt_EUR,Feeling_worry_EUR,Inflammatory_bowel_disease_EUR,Lymphocyte_percentage_of_white_cells_EUR,Mouth_ulcers_EUR,Ne…	1	1	1	0	1	EBNA2_gain_loop	chr1	197742569	197748981	loop_317
chr1	197746486	197746486	rs1775447	Educational_attainment__years_of_education_EUR	0	0	0	0	0	EBNA2_gain_loop	chr1	197742569	197748981	loop_317
chr1	197746925	197746925	rs1747812	Educational_attainment__years_of_education_EUR	0	0	0	0	0	EBNA2_gain_loop	chr1	197742569	197748981	loop_317
chr1	197746995	197746995	rs1775446	Educational_attainment__years_of_education_EUR	0	0	0	0	0	EBNA2_gain_loop	chr1	197742569	197748981	loop_317
chr1	197747777	197747777	rs1775445	Educational_attainment__years_of_education_EUR	0	0	0	0	0	EBNA2_gain_loop	chr1	197742569	197748981	loop_317
chr1	198589709	198589709	rs16843465	Mean_corpuscular_hemoglobin_EAS,Mean_corpuscular_hemoglobin_concentration_EAS,Mean_corpuscular_volume_EAS,Red_blood_cell_count_EAS,Systemic_lupus_erythematosus_EAS,Immature_fraction_of_reticulocytes_EUR,Mean_corpuscular_volume_EUR,Red_blood_cell_count_EUR	1	1	1	0	0	EBNA2_gain_loop	chr1	198589539	198593589	loop_317
chr1	198590366	198590366	rs72736070	Mean_corpuscular_hemoglobin_AFR,Mean_corpuscular_hemoglobin_EAS,Mean_corpuscular_hemoglobin_concentration_EAS,Mean_corpuscular_volume_EAS,Red_blood_cell_count_EAS,Systemic_lupus_erythematosus_EAS,Lymphocyte_counts_EUR,Mean_corpuscular_hemoglobin_EUR,Systemic_lupus_erythematosus_EUR	1	1	1	0	0	EBNA2_gain_loop	chr1	198589539	198593589	loop_317
chr1	198590421	198590421	rs16843471	Mean_corpuscular_hemoglobin_AFR,Mean_corpuscular_hemoglobin_EAS,Mean_corpuscular_hemoglobin_concentration_EAS,Mean_corpuscular_volume_EAS,Red_blood_cell_count_EAS,Systemic_lupus_erythematosus_EAS,Lymphocyte_counts_EUR,Mean_corpuscular_hemoglobin_EUR,Systemic_lupus_erythematosus_EUR	1	1	1	0	0	EBNA2_gain_loop	chr1	198589539	198593589	loop_317
chr1	198590454	198590454	rs16843474	Mean_corpuscular_hemoglobin_AFR,Mean_corpuscular_hemoglobin_EAS,Mean_corpuscular_hemoglobin_concentration_EAS,Mean_corpuscular_volume_EAS,Red_blood_cell_count_EAS,Systemic_lupus_erythematosus_EAS,Lymphocyte_counts_EUR,Mean_corpuscular_hemoglobin_EUR,Systemic_lupus_erythematosus_EUR	1	1	1	0	0	EBNA2_gain_loop	chr1	198589539	198593589	loop_317
chr1	198591077	198591077	rs16843476	Mean_corpuscular_hemoglobin_EAS,Mean_corpuscular_hemoglobin_concentration_EAS,Mean_corpuscular_volume_EAS,Red_blood_cell_count_EAS,Systemic_lupus_erythematosus_EAS,Immature_fraction_of_reticulocytes_EUR,Mean_corpuscular_volume_EUR,Red_blood_cell_count_EUR	1	1	1	0	0	EBNA2_gain_loop	chr1	198589539	198593589	loop_317
chr1	198591528	198591528	rs12129000	Mean_corpuscular_hemoglobin_AFR,Mean_corpuscular_hemoglobin_EAS,Mean_corpuscular_hemoglobin_concentration_EAS,Mean_corpuscular_volume_EAS,Red_blood_cell_count_EAS,Systemic_lupus_erythematosus_EAS,Lymphocyte_counts_EUR,Mean_corpuscular_hemoglobin_EUR,Systemic_lupus_erythematosus_EUR	1	1	1	0	0	EBNA2_gain_loop	chr1	198589539	198593589	loop_317
chr1	198592205	198592205	rs35536362	Mean_corpuscular_hemoglobin_AFR,Mean_corpuscular_hemoglobin_EAS,Mean_corpuscular_hemoglobin_concentration_EAS,Mean_corpuscular_volume_EAS,Red_blood_cell_count_EAS,Systemic_lupus_erythematosus_EAS,Lymphocyte_counts_EUR,Mean_corpuscular_hemoglobin_EUR,Systemic_lupus_erythematosus_EUR	1	1	1	0	0	EBNA2_gain_loop	chr1	198589539	198593589	loop_317
chr1	198592307	198592307	rs79412201	Mean_corpuscular_hemoglobin_EAS,Mean_corpuscular_hemoglobin_concentration_EAS,Mean_corpuscular_volume_EAS,Red_blood_cell_count_EAS,Systemic_lupus_erythematosus_EAS,Immature_fraction_of_reticulocytes_EUR,Mean_corpuscular_volume_EUR,Red_blood_cell_count_EUR	1	1	1	0	0	EBNA2_gain_loop	chr1	198589539	198593589	loop_317
chr1	198592353	198592353	rs16843488	Mean_corpuscular_hemoglobin_EAS,Mean_corpuscular_hemoglobin_concentration_EAS,Mean_corpuscular_volume_EAS,Red_blood_cell_count_EAS,Systemic_lupus_erythematosus_EAS,Immature_fraction_of_reticulocytes_EUR,Mean_corpuscular_volume_EUR,Red_blood_cell_count_EUR	1	1	1	0	0	EBNA2_gain_loop	chr1	198589539	198593589	loop_317
chr1	198592749	198592749	rs16843492	Mean_corpuscular_hemoglobin_EAS,Mean_corpuscular_hemoglobin_concentration_EAS,Mean_corpuscular_volume_EAS,Red_blood_cell_count_EAS,Systemic_lupus_erythematosus_EAS,Immature_fraction_of_reticulocytes_EUR,Mean_corpuscular_volume_EUR,Red_blood_cell_count_EUR	1	1	1	0	0	EBNA2_gain_loop	chr1	198589539	198593589	loop_317
chr1	198592929	198592929	rs12126799	Mean_corpuscular_hemoglobin_AFR,Mean_corpuscular_hemoglobin_EAS,Mean_corpuscular_hemoglobin_concentration_EAS,Mean_corpuscular_volume_EAS,Red_blood_cell_count_EAS,Systemic_lupus_erythematosus_EAS,Lymphocyte_counts_EUR,Mean_corpuscular_hemoglobin_EUR,Systemic_lupus_erythematosus_EUR	1	1	1	0	0	EBNA2_gain_loop	chr1	198589539	198593589	loop_317
chr1	198593211	198593211	rs58480793	Mean_corpuscular_hemoglobin_EAS,Mean_corpuscular_hemoglobin_concentration_EAS,Mean_corpuscular_volume_EAS,Red_blood_cell_count_EAS,Systemic_lupus_erythematosus_EAS,Immature_fraction_of_reticulocytes_EUR,Mean_corpuscular_volume_EUR,Red_blood_cell_count_EUR	1	1	1	0	0	EBNA2_gain_loop	chr1	198589539	198593589	loop_317
chr1	199010721	199010721	rs1434282	Mean_corpuscular_hemoglobin_EAS,Mean_corpuscular_volume_EAS,Platelet_count_EAS,Red_blood_cell_count_EAS,Red_blood_cell_traits_EAS,Eosinophil_counts_EUR,Eosinophil_percentage_of_granulocytes_EUR,Eosinophil_percentage_of_white_cells_EUR,High_light_scatter_reticulocyte_percentage_of_red_cells_EUR,Mean_corpuscular_hemoglobin_EUR,Mean_corpuscular_volume_EUR,Mean_platelet_volume_EUR,Neutrophil_percenta…	0	0	1	0	0	EBNA2_open_Chromatin	chr1	199010682	199011084	205
chr1	200087926	200087926	rs3790806	Lung_function__FVC_EAS	0	0	0	0	0	EBNA2_closed_chromatin	chr1	200087889	200088294	232
chr1	200088240	200088240	rs2737679	Chronic_inflammatory_diseases__ankylosing_spondylitis__Crohn_s_disease__psoriasis__primary_sclerosing_cholangitis__ulcerative_colitis___pleiotropy_EUR,Inflammatory_bowel_disease_EUR,Ulcerative_colitis_EUR	1	1	1	0	1	EBNA2_closed_chromatin	chr1	200087889	200088294	232
chr1	200255600	200255600	rs6427813	Urinary_albumin_excretion_EUR	0	0	0	0	0	EBNA2_open_Chromatin	chr1	200254983	200255703	367
chr1	203431154	203431154	rs200589564	Blood_protein_levels_EUR	0	0	0	0	0	EBNA2_open_Chromatin	chr1	203430757	203431249	248
chr1	203714162	203714162	rs11576096	Male_pattern_baldness_EUR	0	0	0	0	0	EBNA2_gain_loop	chr1	203708672	203714472	loop_327
chr1	205253839	205253839	rs3851296	Mean_platelet_volume_EUR	0	0	0	0	0	EBNA2_gain_loop	chr1	205252494	205257814	loop_330
chr1	205254238	205254238	rs1151787	High_light_scatter_reticulocyte_count_EUR,High_light_scatter_reticulocyte_percentage_of_red_cells_EUR,Immature_fraction_of_reticulocytes_EUR,Mean_corpuscular_hemoglobin_EUR,Mean_corpuscular_hemoglobin_concentration_EUR,Mean_corpuscular_volume_EUR,Mean_platelet_volume_EUR,Platelet_count_EUR,Reticulocyte_count_EUR,Reticulocyte_fraction_of_red_cells_EUR	0	0	0	0	0	EBNA2_gain_loop	chr1	205252494	205257814	loop_330
chr1	205255438	205255438	rs1180734	High_light_scatter_reticulocyte_count_EUR,High_light_scatter_reticulocyte_percentage_of_red_cells_EUR,Immature_fraction_of_reticulocytes_EUR,Mean_corpuscular_hemoglobin_EUR,Mean_corpuscular_hemoglobin_concentration_EUR,Mean_corpuscular_volume_EUR,Mean_platelet_volume_EUR,Platelet_count_EUR,Reticulocyte_count_EUR,Reticulocyte_fraction_of_red_cells_EUR	0	0	0	0	0	EBNA2_gain_loop	chr1	205252494	205257814	loop_330
chr1	205256818	205256818	rs12122105	High_light_scatter_reticulocyte_count_EUR,High_light_scatter_reticulocyte_percentage_of_red_cells_EUR,Immature_fraction_of_reticulocytes_EUR,Mean_corpuscular_hemoglobin_EUR,Mean_corpuscular_hemoglobin_concentration_EUR,Mean_corpuscular_volume_EUR,Mean_platelet_volume_EUR,Platelet_count_EUR,Reticulocyte_count_EUR,Reticulocyte_fraction_of_red_cells_EUR	0	0	0	0	0	EBNA2_gain_loop	chr1	205252494	205257814	loop_330
chr1	205257156	205257156	rs896321	Mean_platelet_volume_EUR	0	0	0	0	0	EBNA2_gain_loop	chr1	205252494	205257814	loop_330
chr1	206890435	206890435	rs6669284	Blood_protein_levels_EUR	0	0	0	0	0	EBNA2_gain_loop	chr1	206889074	206893652	loop_339
chr1	206890449	206890449	rs4256810	Blood_protein_levels_EUR	0	0	0	0	0	EBNA2_gain_loop	chr1	206889074	206893652	loop_339
chr1	212872852	212872852	rs73079851	Leprosy_EAS	0	0	0	0	0	EBNA2_up_genes	chr1	212872826	212873826	BATF3
chr1	212873074	212873074	rs2202683	Leprosy_EAS	0	0	0	0	0	EBNA2_up_genes	chr1	212872826	212873826	BATF3
chr1	212873096	212873096	rs2202682	Leprosy_EAS	0	0	0	0	0	EBNA2_up_genes	chr1	212872826	212873826	BATF3
chr1	212873431	212873431	rs2221593	Leprosy_EAS	0	0	0	0	0	EBNA2_up_genes	chr1	212872826	212873826	BATF3
chr1	212873557	212873557	rs3754482	Leprosy_EAS	0	0	0	0	0	EBNA2_up_genes	chr1	212872826	212873826	BATF3
chr1	218458557	218458557	rs3831934	Central_corneal_thickness_EAS	0	0	0	0	0	EBNA2_open_Chromatin	chr1	218458238	218458984	395
chr1	221339082	221339082	rs57489853	Diastolic_blood_pressure_EUR,Waist_circumference_adjusted_for_body_mass_index_EUR	0	0	0	0	0	EBNA2_gain_loop	chr1	221338446	221343308	loop_348
chr1	221339269	221339269	rs9431425	Diastolic_blood_pressure_EUR,Waist_circumference_adjusted_for_body_mass_index_EUR	0	0	0	0	0	EBNA2_gain_loop	chr1	221338446	221343308	loop_348
chr1	221339294	221339294	rs3920857	Diastolic_blood_pressure_EUR,Waist_circumference_adjusted_for_body_mass_index_EUR	0	0	0	0	0	EBNA2_gain_loop	chr1	221338446	221343308	loop_348
chr1	221339332	221339332	rs17009529	Diastolic_blood_pressure_EUR,Waist_circumference_adjusted_for_body_mass_index_EUR	0	0	0	0	0	EBNA2_gain_loop	chr1	221338446	221343308	loop_348
chr1	221339474	221339474	rs17009536	Diastolic_blood_pressure_EUR,Waist_circumference_adjusted_for_body_mass_index_EUR	0	0	0	0	0	EBNA2_gain_loop	chr1	221338446	221343308	loop_348
chr1	221342492	221342492	rs67635817	Diastolic_blood_pressure_EUR,Waist_circumference_adjusted_for_body_mass_index_EUR	0	0	0	0	0	EBNA2_gain_loop	chr1	221338446	221343308	loop_348
chr1	225653986	225653986	rs145037432	Neuroticism_EUR	0	0	0	0	0	EBNA2_gain_loop	chr1	225653877	225656788	loop_354
chr1	225663968	225663968	rs80288990	Neuroticism_EUR	0	0	0	0	0	EBNA2_gain_loop	chr1	225663660	225670326	loop_355
chr1	225664890	225664890	rs373133396	Neuroticism_EUR	0	0	0	0	0	EBNA2_gain_loop	chr1	225663660	225670326	loop_355
chr1	225666389	225666389	rs114168738	Neuroticism_EUR	0	0	0	0	0	EBNA2_gain_loop	chr1	225663660	225670326	loop_355
chr1	225666401	225666401	rs116415296	Neuroticism_EUR	0	0	0	0	0	EBNA2_gain_loop	chr1	225663660	225670326	loop_355
chr1	225666417	225666417	rs144488689	Neuroticism_EUR	0	0	0	0	0	EBNA2_gain_loop	chr1	225663660	225670326	loop_355
chr1	225667187	225667187	rs79343252	Neuroticism_EUR	0	0	0	0	0	EBNA2_gain_loop	chr1	225663660	225670326	loop_355
chr1	225667686	225667686	rs147863584	Neuroticism_EUR	0	0	0	0	0	EBNA2_gain_loop	chr1	225663660	225670326	loop_355
chr1	225667734	225667734	rs147106118	Neuroticism_EUR	0	0	0	0	0	EBNA2_gain_loop	chr1	225663660	225670326	loop_355
chr1	225668285	225668285	rs17559587	Neuroticism_EUR	0	0	0	0	0	EBNA2_gain_loop	chr1	225663660	225670326	loop_355
chr1	226542049	226542049	rs6426551	Platelet_count_EAS	0	0	0	0	0	EBNA2_loss_loop	chr1	226540150	226545520	loop_23
chr1	226545433	226545433	rs56033994	Platelet_count_EAS	0	0	0	0	0	EBNA2_loss_loop	chr1	226540150	226545520	loop_23
chr1	226924875	226924875	rs147889095	Parkinson_s_disease_EUR	0	0	0	0	0	EBNA2_gain_loop	chr1	226924760	226929757	loop_371
chr1	230258361	230258361	rs3033644	Blood_protein_levels_EUR,Depressive_symptoms_EUR,Neuroticism_EUR,Well_being_spectrum__multivariate_analysis_EUR	0	0	0	0	0	EBNA2_gain_loop	chr1	230256914	230263342	loop_378
chr1	230261441	230261441	rs10628440	Blood_protein_levels_EUR,Depressive_symptoms_EUR,Neuroticism_EUR,Well_being_spectrum__multivariate_analysis_EUR	0	0	0	0	0	EBNA2_gain_loop	chr1	230256914	230263342	loop_378
chr1	235681642	235681642	rs6684634	Body_mass_index_EAS	0	0	0	0	0	EBNA2_closed_chromatin	chr1	235681562	235681853	147
chr1	235681649	235681649	rs6684635	Body_mass_index_EAS	0	0	0	0	0	EBNA2_closed_chromatin	chr1	235681562	235681853	147
chr1	235681673	235681673	rs6684645	Body_mass_index_EAS	0	0	0	0	0	EBNA2_closed_chromatin	chr1	235681562	235681853	147
chr1	235681680	235681680	rs6679914	Body_mass_index_EAS	0	0	0	0	0	EBNA2_closed_chromatin	chr1	235681562	235681853	147
chr1	235681714	235681714	rs113724441	Body_mass_index_EAS	0	0	0	0	0	EBNA2_closed_chromatin	chr1	235681562	235681853	147
chr1	235681724	235681724	rs6687697	Body_mass_index_EAS	0	0	0	0	0	EBNA2_closed_chromatin	chr1	235681562	235681853	147
chr1	235681728	235681728	rs6670231	Body_mass_index_EAS	0	0	0	0	0	EBNA2_closed_chromatin	chr1	235681562	235681853	147
chr1	235681772	235681772	rs112552715	Body_mass_index_EAS	0	0	0	0	0	EBNA2_closed_chromatin	chr1	235681562	235681853	147
chr10	6089777	6089777	rs12722504	Soluble_interleukin_2_receptor_subunit_alpha_AFR,Multiple_sclerosis_EUR	1	0	1	0	0	EBNA2_gain_loop	chr10	6088951	6095695	loop_1760
chr10	6089841	6089841	rs7909519	Allergic_disease__asthma__hay_fever_or_eczema_EUR,Asthma_or_allergic_disease__pleiotropy_EUR,Chronic_inflammatory_diseases__ankylosing_spondylitis__Crohn_s_disease__psoriasis__primary_sclerosing_cholangitis__ulcerative_colitis___pleiotropy_EUR,Crohn_s_disease_EUR,Juvenile_idiopathic_arthritis__oligoarticular_or_rheumatoid_factor_negative_polyarticular_EUR,Lymphocyte_percentage_of_white_cells_EUR,…	1	1	1	1	1	EBNA2_gain_loop	chr10	6088951	6095695	loop_1760
chr10	6090322	6090322	rs791590	Soluble_interleukin_2_receptor_subunit_alpha_AFR,Crohn_s_disease_EUR,Inflammatory_bowel_disease_EUR	0	0	1	0	1	EBNA2_gain_loop	chr10	6088951	6095695	loop_1760
chr10	6091017	6091017	rs7090504	Lymphocyte_counts_EUR	0	0	1	0	0	EBNA2_gain_loop	chr10	6088951	6095695	loop_1760
chr10	6092055	6092055	rs10905668	Lymphocyte_counts_EUR	0	0	1	0	0	EBNA2_gain_loop	chr10	6088951	6095695	loop_1760
chr10	6092093	6092093	rs10905669	Lymphocyte_counts_EUR	0	0	1	0	0	EBNA2_gain_loop	chr10	6088951	6095695	loop_1760
chr10	6092210	6092210	rs2246031	Soluble_interleukin_2_receptor_subunit_alpha_AFR,Crohn_s_disease_EUR,Inflammatory_bowel_disease_EUR	0	0	1	0	1	EBNA2_gain_loop	chr10	6088951	6095695	loop_1760
chr10	6093139	6093139	rs12722502	Asthma_EUR,Asthma__adult_onset_EUR,Asthma__childhood_onset_EUR	0	0	1	1	0	EBNA2_gain_loop	chr10	6088951	6095695	loop_1760
chr10	6094697	6094697	rs61839660	Allergic_disease__asthma__hay_fever_or_eczema_EUR,Asthma_or_allergic_disease__pleiotropy_EUR,Chronic_inflammatory_diseases__ankylosing_spondylitis__Crohn_s_disease__psoriasis__primary_sclerosing_cholangitis__ulcerative_colitis___pleiotropy_EUR,Crohn_s_disease_EUR,Juvenile_idiopathic_arthritis__oligoarticular_or_rheumatoid_factor_negative_polyarticular_EUR,Lymphocyte_percentage_of_white_cells_EUR,…	1	1	1	1	1	EBNA2_gain_loop	chr10	6088951	6095695	loop_1760
chr10	6095410	6095410	rs2476491	Juvenile_idiopathic_arthritis_CAGE_curated	1	0	1	0	0	EBNA2_gain_loop	chr10	6088951	6095695	loop_1760
chr10	6095577	6095577	rs2245675	Juvenile_idiopathic_arthritis_CAGE_curated	1	0	1	0	0	EBNA2_gain_loop	chr10	6088951	6095695	loop_1760
chr10	6186121	6186121	rs77793921	Type_1_diabetes_EUR	1	0	1	0	0	EBNA2_gain_loop	chr10	6185542	6188748	loop_1766
chr10	6390192	6390192	rs2387397	Rheumatoid_arthritis_EAS,Rheumatoid_arthritis__ACPA_positive_EAS,Celiac_disease_EUR	1	1	1	0	1	EBNA2_gain_loop	chr10	6388770	6392873	loop_1769
chr10	6390450	6390450	rs947474	Rheumatoid_arthritis_AFR,Rheumatoid_arthritis_EAS,Rheumatoid_arthritis__ACPA_positive_EAS,Rheumatoid_arthritis_EUR,Rheumatoid_arthritis__ACPA_positive_EUR,Type_1_diabetes_EUR	1	1	1	0	1	EBNA2_gain_loop	chr10	6388770	6392873	loop_1769
chr10	6391491	6391491	rs2181623	Rheumatoid_arthritis_EAS,Rheumatoid_arthritis__ACPA_positive_EAS,Rheumatoid_arthritis_EUR,Rheumatoid_arthritis__ACPA_positive_EUR,Type_1_diabetes_EUR	1	1	1	0	1	EBNA2_gain_loop	chr10	6388770	6392873	loop_1769
chr10	6402741	6402741	rs10796045	Rheumatoid_arthritis_EUR,Rheumatoid_arthritis__ACPA_positive_EUR,Type_1_diabetes_EUR	1	1	1	0	1	EBNA2_gain_loop	chr10	6402700	6404040	loop_1769
chr10	6403050	6403050	rs2146900	Rheumatoid_arthritis_EUR,Rheumatoid_arthritis__ACPA_positive_EUR,Type_1_diabetes_EUR	1	1	1	0	1	EBNA2_gain_loop	chr10	6402700	6404040	loop_1769
chr10	6621773	6621773	rs943451	Asthma_EUR,Asthma__childhood_onset_EUR	0	0	1	1	0	EBNA2_down_genes	chr10	6621762	6622762	PRKCQ
chr10	6622094	6622094	rs11259670	Asthma_EUR,Asthma__childhood_onset_EUR	0	0	1	1	0	EBNA2_down_genes	chr10	6621762	6622762	PRKCQ
chr10	14699137	14699137	chr10_14699137	Cotinine_glucuronidation_EUR	0	0	0	0	0	EBNA2_gain_loop	chr10	14698629	14703951	loop_1776
chr10	14700887	14700887	rs141666501	Cotinine_glucuronidation_EAS	0	0	0	0	0	EBNA2_gain_loop	chr10	14698629	14703951	loop_1776
chr10	14702098	14702098	rs151233978	Cotinine_glucuronidation_EUR	0	0	0	0	0	EBNA2_gain_loop	chr10	14698629	14703951	loop_1776
chr10	14702439	14702439	chr10_14702439	Cotinine_glucuronidation_EUR	0	0	0	0	0	EBNA2_gain_loop	chr10	14698629	14703951	loop_1776
chr10	23656316	23656316	rs1039966	Heel_bone_mineral_density_EUR	0	0	0	0	0	EBNA2_gain_loop	chr10	23656067	23658751	loop_1782
chr10	27441973	27441973	rs1775350	Plateletcrit_EUR	0	0	0	0	0	EBNA2_gain_loop	chr10	27441919	27445800	loop_1790
chr10	27444344	27444344	rs7907988	Plateletcrit_EUR	0	0	0	0	0	EBNA2_gain_loop	chr10	27441919	27445800	loop_1790
chr10	27445726	27445726	rs1253045	Plateletcrit_EUR	0	0	0	0	0	EBNA2_gain_loop	chr10	27441919	27445800	loop_1790
chr10	30722908	30722908	rs306587	Chronic_inflammatory_diseases__ankylosing_spondylitis__Crohn_s_disease__psoriasis__primary_sclerosing_cholangitis__ulcerative_colitis___pleiotropy_EUR,Crohn_s_disease_EUR,Inflammatory_bowel_disease_EUR	1	1	1	0	1	EBNA2_up_genes	chr10	30722449	30723449	MAP3K8
chr10	35484949	35484949	rs1057108	Chronic_inflammatory_diseases__ankylosing_spondylitis__Crohn_s_disease__psoriasis__primary_sclerosing_cholangitis__ulcerative_colitis___pleiotropy_EUR,Crohn_s_disease_EUR,Inflammatory_bowel_disease_EUR	1	1	1	0	1	EBNA2_open_Chromatin	chr10	35484649	35485285	405
chr10	62895223	62895223	rs1906462	Male_pattern_baldness_EUR	0	0	0	0	0	EBNA2_open_Chromatin	chr10	62894968	62895536	392
chr10	64391167	64391167	rs71022162	Chronic_inflammatory_diseases__ankylosing_spondylitis__Crohn_s_disease__psoriasis__primary_sclerosing_cholangitis__ulcerative_colitis___pleiotropy_EUR,Eosinophil_counts_EUR,Eosinophil_percentage_of_granulocytes_EUR,Eosinophil_percentage_of_white_cells_EUR,Neutrophil_percentage_of_granulocytes_EUR,Pediatric_autoimmune_diseases_EUR,Sum_eosinophil_basophil_counts_EUR	1	1	1	0	1	EBNA2_gain_loop	chr10	64391037	64393315	loop_1802
chr10	64391208	64391208	rs10995243	Chronic_inflammatory_diseases__ankylosing_spondylitis__Crohn_s_disease__psoriasis__primary_sclerosing_cholangitis__ulcerative_colitis___pleiotropy_EUR,Eosinophil_counts_EUR,Eosinophil_percentage_of_granulocytes_EUR,Eosinophil_percentage_of_white_cells_EUR,Neutrophil_percentage_of_granulocytes_EUR,Pediatric_autoimmune_diseases_EUR,Sum_eosinophil_basophil_counts_EUR	1	1	1	0	1	EBNA2_gain_loop	chr10	64391037	64393315	loop_1802
chr10	64391375	64391375	rs10995245	Narcolepsy_EAS,Asthma_EUR,Asthma__childhood_onset_EUR	0	0	1	1	0	EBNA2_gain_loop	chr10	64391037	64393315	loop_1802
chr10	64391846	64391846	rs10995246	Chronic_inflammatory_diseases__ankylosing_spondylitis__Crohn_s_disease__psoriasis__primary_sclerosing_cholangitis__ulcerative_colitis___pleiotropy_EUR,Eosinophil_counts_EUR,Eosinophil_percentage_of_granulocytes_EUR,Eosinophil_percentage_of_white_cells_EUR,Neutrophil_percentage_of_granulocytes_EUR,Pediatric_autoimmune_diseases_EUR,Sum_eosinophil_basophil_counts_EUR	1	1	1	0	1	EBNA2_gain_loop	chr10	64391037	64393315	loop_1802
chr10	64564892	64564892	rs2236295	Diastolic_blood_pressure_AFR,Diastolic_blood_pressure_x_alcohol_consumption_interaction__2df_test_AFR,Systolic_blood_pressure_AFR,Diastolic_blood_pressure_AMR,Diastolic_blood_pressure_x_alcohol_consumption_interaction__2df_test_AMR,Systolic_blood_pressure_AMR,Diastolic_blood_pressure_EAS,Diastolic_blood_pressure_x_alcohol_consumption_interaction__2df_test_EAS,Systolic_blood_pressure_EAS,Diastolic…	0	0	0	0	0	EBNA2_gain_loop	chr10	64563007	64566205	loop_1802
chr10	64564934	64564934	rs10995311	Diastolic_blood_pressure_AMR,Diastolic_blood_pressure_x_alcohol_consumption_interaction__2df_test_AMR,Systolic_blood_pressure_AMR,Diastolic_blood_pressure_EAS,Diastolic_blood_pressure_x_alcohol_consumption_interaction__2df_test_EAS,Systolic_blood_pressure_EAS,Urinary_albumin_excretion_EUR,Urinary_albumin_excretion__no_hypertensive_medication_EUR	0	0	0	0	0	EBNA2_gain_loop	chr10	64563007	64566205	loop_1802
chr10	73846826	73846826	rs1245546	Blood_protein_levels_EUR	0	0	0	0	0	EBNA2_gain_loop	chr10	73846451	73848568	loop_1817
chr10	73847354	73847354	rs1245545	Blood_protein_levels_EUR	0	0	0	0	0	EBNA2_gain_loop	chr10	73846451	73848568	loop_1817
chr10	73847739	73847739	rs751835	Blood_protein_levels_EUR	0	0	0	0	0	EBNA2_gain_loop	chr10	73846451	73848568	loop_1817
chr10	74031694	74031694	rs6480608	Blond_vs__brown_black_hair_color_EUR	0	0	0	0	0	EBNA2_gain_loop	chr10	74031608	74035440	loop_1827
chr10	74057642	74057642	rs6480615	Blond_vs__brown_black_hair_color_EUR	0	0	0	0	0	EBNA2_gain_loop	chr10	74056352	74058401	loop_1825
chr10	74057844	74057844	rs6480616	Blond_vs__brown_black_hair_color_EUR	0	0	0	0	0	EBNA2_gain_loop	chr10	74056352	74058401	loop_1825
chr10	74081183	74081183	rs9415061	Blond_vs__brown_black_hair_color_EUR,Cognitive_performance__MTAG_EUR,Educational_attainment__MTAG_EUR,Highest_math_class_taken__MTAG_EUR	0	0	0	0	0	EBNA2_gain_loop	chr10	74078912	74084428	loop_1829
chr10	74082212	74082212	rs9416013	Spherical_equivalent_or_myopia__age_of_diagnosis_EAS,Blond_vs__brown_black_hair_color_EUR,Cognitive_performance__MTAG_EUR,Spherical_equivalent_or_myopia__age_of_diagnosis_EUR	0	0	0	0	0	EBNA2_gain_loop	chr10	74078912	74084428	loop_1829
chr10	74083427	74083427	rs7895933	Spherical_equivalent_or_myopia__age_of_diagnosis_EAS,Cognitive_performance__MTAG_EUR,Spherical_equivalent_or_myopia__age_of_diagnosis_EUR	0	0	0	0	0	EBNA2_gain_loop	chr10	74078912	74084428	loop_1829
chr10	74113333	74113333	rs9415068	Spherical_equivalent_or_myopia__age_of_diagnosis_EAS,Cognitive_performance__MTAG_EUR,Educational_attainment__MTAG_EUR,Highest_math_class_taken__MTAG_EUR,Spherical_equivalent_or_myopia__age_of_diagnosis_EUR	0	0	0	0	0	EBNA2_gain_loop	chr10	74113159	74115722	loop_1829
chr10	75545063	75545063	rs11000777	Pulse_pressure_AMR,Systolic_blood_pressure_AMR,Atrial_fibrillation_EUR,Chronic_obstructive_pulmonary_disease_or_resting_heart_rate__pleiotropy_EUR,Pulse_pressure_EUR,Systolic_blood_pressure_EUR	0	0	0	0	0	EBNA2_gain_loop	chr10	75544338	75546136	loop_1833
chr10	75545117	75545117	rs79936644	Pulse_pressure_AMR,Systolic_blood_pressure_AMR,Atrial_fibrillation_EUR,Chronic_obstructive_pulmonary_disease_or_resting_heart_rate__pleiotropy_EUR,Pulse_pressure_EUR,Systolic_blood_pressure_EUR	0	0	0	0	0	EBNA2_gain_loop	chr10	75544338	75546136	loop_1833
chr10	75545251	75545251	rs12256103	Educational_attainment__MTAG_EUR,FEV1_EUR,Lung_function__FEV1_FVC_EUR,Lung_function__FVC_EUR	0	0	0	0	0	EBNA2_gain_loop	chr10	75544338	75546136	loop_1833
chr10	75624645	75624645	rs2461867	Chronic_inflammatory_diseases__ankylosing_spondylitis__Crohn_s_disease__psoriasis__primary_sclerosing_cholangitis__ulcerative_colitis___pleiotropy_EUR,Crohn_s_disease_EUR,Educational_attainment__MTAG_EUR,FEV1_EUR,Lung_function__FEV1_FVC_EUR,Lung_function__FVC_EUR	1	1	1	0	1	EBNA2_gain_loop	chr10	75623883	75626975	loop_1834
chr10	75625558	75625558	rs17631059	FEV1_EUR,Lung_function__FEV1_FVC_EUR,Peak_expiratory_flow_EUR	0	0	0	0	0	EBNA2_gain_loop	chr10	75623883	75626975	loop_1834
chr10	81046265	81046265	rs1250567	Colorectal_cancer_or_advanced_adenoma_EAS,Colorectal_cancer_or_advanced_adenoma_EUR,Granulocyte_count_EUR,Lymphocyte_percentage_of_white_cells_EUR,Multiple_sclerosis_EUR,Neutrophil_percentage_of_white_cells_EUR	1	0	1	0	0	EBNA2_allelic	chr10	81046264	81046265	rs1250567
chr10	82214065	82214065	rs116857892	Pulse_pressure_EUR	0	0	0	0	0	EBNA2_gain_loop	chr10	82213371	82215205	loop_1840
chr10	82214792	82214792	rs4934189	Pulse_pressure_EUR	0	0	0	0	0	EBNA2_gain_loop	chr10	82213371	82215205	loop_1840
chr10	89478388	89478388	rs11202524	Heel_bone_mineral_density_EUR	0	0	0	0	0	EBNA2_open_Chromatin	chr10	89477783	89478480	500
chr10	89478389	89478389	rs11202525	Heel_bone_mineral_density_EUR	0	0	0	0	0	EBNA2_open_Chromatin	chr10	89477783	89478480	500
chr10	89623716	89623716	rs12573787	Systolic_blood_pressure_EAS	0	0	0	0	0	EBNA2_gain_loop	chr10	89620439	89629045	loop_1845
chr10	89626375	89626375	rs79540160	Systolic_blood_pressure_EAS	0	0	0	0	0	EBNA2_gain_loop	chr10	89620439	89629045	loop_1845
chr10	89787275	89787275	rs2049814	Pulse_pressure_AFR,Pulse_pressure_AMR,Pulse_pressure_EAS,Pulse_pressure_EUR	0	0	0	0	0	EBNA2_gain_loop	chr10	89786853	89788624	loop_1846
chr10	91413368	91413368	rs12572869	Red_blood_cell_count_EUR	0	0	0	0	0	EBNA2_gain_loop	chr10	91411952	91413994	loop_1850
chr10	91460084	91460084	rs76632673	Red_blood_cell_count_EUR	0	0	0	0	0	EBNA2_gain_loop	chr10	91460063	91462999	loop_1850
chr10	91462946	91462946	rs10082364	Highest_math_class_taken__MTAG_EUR,Self_reported_math_ability_EUR,Self_reported_math_ability__MTAG_EUR	0	0	0	0	0	EBNA2_gain_loop	chr10	91460063	91462999	loop_1850
chr10	97415455	97415455	rs3793747	Blood_metabolite_levels_EUR,Blood_protein_levels_EUR,PR_interval_EUR	0	0	0	0	0	EBNA2_gain_loop	chr10	97414538	97417724	loop_1854
chr10	97417174	97417174	rs3763707	Blood_metabolite_levels_EUR,Blood_protein_levels_EUR,PR_interval_EUR	0	0	0	0	0	EBNA2_gain_loop	chr10	97414538	97417724	loop_1854
chr10	98460581	98460581	rs45587331	Alanine_transaminase_levels_EAS,Monocyte_percentage_of_white_cells_EUR	0	0	1	0	0	EBNA2_gain_loop	chr10	98459492	98465064	loop_1860
chr10	99159304	99159304	rs10882924	Granulocyte_percentage_of_myeloid_white_cells_EUR,Monocyte_count_EUR	0	0	1	0	0	EBNA2_gain_loop	chr10	99159207	99161772	loop_1861
chr10	99159465	99159465	rs10786343	Monocyte_count_EUR	0	0	1	0	0	EBNA2_gain_loop	chr10	99159207	99161772	loop_1861
chr10	99159482	99159482	rs9888116	Granulocyte_percentage_of_myeloid_white_cells_EUR,Monocyte_count_EUR	0	0	1	0	0	EBNA2_gain_loop	chr10	99159207	99161772	loop_1861
chr10	99159634	99159634	rs9887991	Granulocyte_percentage_of_myeloid_white_cells_EUR,Monocyte_count_EUR	0	0	1	0	0	EBNA2_gain_loop	chr10	99159207	99161772	loop_1861
chr10	99159670	99159670	rs10882925	Granulocyte_percentage_of_myeloid_white_cells_EUR,Monocyte_percentage_of_white_cells_EUR	0	0	1	0	0	EBNA2_gain_loop	chr10	99159207	99161772	loop_1861
chr10	99159716	99159716	rs72281517	Granulocyte_percentage_of_myeloid_white_cells_EUR,Monocyte_count_EUR	0	0	1	0	0	EBNA2_gain_loop	chr10	99159207	99161772	loop_1861
chr10	99159815	99159815	rs9887994	Granulocyte_percentage_of_myeloid_white_cells_EUR,Monocyte_percentage_of_white_cells_EUR	0	0	1	0	0	EBNA2_gain_loop	chr10	99159207	99161772	loop_1861
chr10	99159869	99159869	rs9888026	Granulocyte_percentage_of_myeloid_white_cells_EUR,Monocyte_count_EUR	0	0	1	0	0	EBNA2_gain_loop	chr10	99159207	99161772	loop_1861
chr10	99159963	99159963	rs9888117	Granulocyte_percentage_of_myeloid_white_cells_EUR,Monocyte_count_EUR	0	0	1	0	0	EBNA2_gain_loop	chr10	99159207	99161772	loop_1861
chr10	99160046	99160046	rs2297668	Granulocyte_percentage_of_myeloid_white_cells_EUR,Monocyte_count_EUR	0	0	1	0	0	EBNA2_gain_loop	chr10	99159207	99161772	loop_1861
chr10	99160152	99160152	rs1048442	Granulocyte_percentage_of_myeloid_white_cells_EUR,Monocyte_count_EUR	0	0	1	0	0	EBNA2_gain_loop	chr10	99159207	99161772	loop_1861
chr10	99160690	99160690	rs10882926	Granulocyte_percentage_of_myeloid_white_cells_EUR,Monocyte_count_EUR	0	0	1	0	0	EBNA2_gain_loop	chr10	99159207	99161772	loop_1861
chr10	99160965	99160965	rs2275091	Body_mass_index_EAS	0	0	0	0	0	EBNA2_gain_loop	chr10	99159207	99161772	loop_1861
chr10	102097686	102097686	rs55782832	Macular_thickness_EUR	0	0	0	0	0	EBNA2_gain_loop	chr10	102097667	102099617	loop_1862
chr10	102098544	102098544	chr10_102098544	Macular_thickness_EUR	0	0	0	0	0	EBNA2_gain_loop	chr10	102097667	102099617	loop_1862
chr10	102099009	102099009	rs4113432	Macular_thickness_EUR	0	0	0	0	0	EBNA2_gain_loop	chr10	102097667	102099617	loop_1862
chr10	102099093	102099093	rs683854	Macular_thickness_EUR	0	0	0	0	0	EBNA2_gain_loop	chr10	102097667	102099617	loop_1862
chr10	102099573	102099573	rs17669878	Macular_thickness_EUR	0	0	0	0	0	EBNA2_gain_loop	chr10	102097667	102099617	loop_1862
chr10	102106205	102106205	rs2275656	Macular_thickness_EUR	0	0	0	0	0	EBNA2_gain_loop	chr10	102105250	102109123	loop_1862
chr10	102106298	102106298	rs2275657	Macular_thickness_EUR	0	0	0	0	0	EBNA2_gain_loop	chr10	102105250	102109123	loop_1862
chr10	104261359	104261359	rs2902544	Systolic_blood_pressure_AFR,Body_mass_index__joint_analysis_main_effects_and_physical_activity_interaction_EAS	0	0	0	0	0	EBNA2_gain_loop	chr10	104261236	104262818	loop_1865
chr10	104262628	104262628	rs2296590	Allergic_disease__asthma__hay_fever_or_eczema_EUR	0	0	1	1	0	EBNA2_gain_loop	chr10	104261236	104262818	loop_1865
chr10	104403085	104403085	rs35748678	Body_mass_index__joint_analysis_main_effects_and_physical_activity_interaction_AFR,Body_mass_index__joint_analysis_main_effects_and_physical_activity_interaction_EAS,Blood_protein_levels_EUR,Body_mass_index__joint_analysis_main_effects_and_physical_activity_interaction_EUR	0	0	0	0	0	EBNA2_gain_loop	chr10	104402767	104409037	loop_1866
chr10	104403310	104403310	rs28408682	Smoking_initiation__ever_regular_vs_never_regular_EUR,Smoking_initiation__ever_regular_vs_never_regular___MTAG_EUR,Waist_circumference_adjusted_for_BMI__adjusted_for_smoking_behaviour_EUR,Waist_circumference_adjusted_for_BMI__joint_analysis_main_effects_and_smoking_interaction_EUR,Waist_circumference_adjusted_for_body_mass_index_EUR,Waist_circumference_adjusted_for_BMI__adjusted_for_smoking_behav…	0	0	0	0	0	EBNA2_gain_loop	chr10	104402767	104409037	loop_1866
chr10	104407792	104407792	rs12241531	Creatinine_levels_EAS,Glomerular_filtration_rate_EAS	0	0	0	0	0	EBNA2_gain_loop	chr10	104402767	104409037	loop_1866
chr10	104408272	104408272	rs12241712	White_blood_cell_count_EAS,Prostate_cancer_EUR	0	0	1	0	0	EBNA2_gain_loop	chr10	104402767	104409037	loop_1866
chr10	104419465	104419465	rs10883760	Body_mass_index__joint_analysis_main_effects_and_physical_activity_interaction_EAS,Blood_protein_levels_EUR,Body_mass_index__joint_analysis_main_effects_and_physical_activity_interaction_EUR	0	0	0	0	0	EBNA2_gain_loop	chr10	104419424	104422329	loop_1865
chr10	104420018	104420018	rs10883761	Body_mass_index__joint_analysis_main_effects_and_physical_activity_interaction_AFR,Body_mass_index__joint_analysis_main_effects_and_physical_activity_interaction_EAS,Blood_protein_levels_EUR,Body_mass_index__joint_analysis_main_effects_and_physical_activity_interaction_EUR	0	0	0	0	0	EBNA2_gain_loop	chr10	104419424	104422329	loop_1865
chr10	104420078	104420078	rs7072014	Creatinine_levels_EAS,Glomerular_filtration_rate_EAS	0	0	0	0	0	EBNA2_gain_loop	chr10	104419424	104422329	loop_1865
chr10	104421679	104421679	rs12570611	White_blood_cell_count_EAS,Prostate_cancer_EUR	0	0	1	0	0	EBNA2_gain_loop	chr10	104419424	104422329	loop_1865
chr10	104422046	104422046	rs4522108	White_blood_cell_count_EAS,Prostate_cancer_EUR	0	0	1	0	0	EBNA2_gain_loop	chr10	104419424	104422329	loop_1865
chr10	105229720	105229720	rs3014195	Educational_attainment__MTAG_EUR	0	0	0	0	0	EBNA2_gain_loop	chr10	105229675	105233428	loop_1870
chr10	105230029	105230029	rs3014196	Educational_attainment__MTAG_EUR	0	0	0	0	0	EBNA2_gain_loop	chr10	105229675	105233428	loop_1870
chr10	105230054	105230054	rs2986031	Educational_attainment__MTAG_EUR	0	0	0	0	0	EBNA2_gain_loop	chr10	105229675	105233428	loop_1870
chr10	105230103	105230103	rs3014197	Educational_attainment__MTAG_EUR	0	0	0	0	0	EBNA2_gain_loop	chr10	105229675	105233428	loop_1870
chr10	105230332	105230332	rs2986032	Educational_attainment__MTAG_EUR	0	0	0	0	0	EBNA2_gain_loop	chr10	105229675	105233428	loop_1870
chr10	105232580	105232580	rs2986034	Educational_attainment__MTAG_EUR	0	0	0	0	0	EBNA2_gain_loop	chr10	105229675	105233428	loop_1870
chr10	105233110	105233110	rs2986035	Educational_attainment__MTAG_EUR	0	0	0	0	0	EBNA2_gain_loop	chr10	105229675	105233428	loop_1870
chr10	105615074	105615074	rs10883928	Stroke_AMR,Stroke_EAS,Chronic_obstructive_pulmonary_disease_or_resting_heart_rate__pleiotropy_EUR,Stroke_EUR,Stroke_SAS	0	0	0	0	0	EBNA2_up_genes	chr10	105614663	105615663	SH3PXD2A
chr10	105615462	105615462	rs76220958	Stroke_AMR,Stroke_EAS,Chronic_obstructive_pulmonary_disease_or_resting_heart_rate__pleiotropy_EUR,Stroke_EUR,Stroke_SAS	0	0	0	0	0	EBNA2_up_genes	chr10	105614663	105615663	SH3PXD2A
chr10	106028157	106028157	rs641071	Blood_protein_levels_EUR	0	0	0	0	0	EBNA2_up_genes	chr10	106028130	106029130	GSTO2
chr10	111967555	111967555	rs1475502	Diastolic_blood_pressure_EUR	0	0	0	0	0	EBNA2_up_genes	chr10	111966862	111967862	MXI1
chr10	115720514	115720514	rs151597	Diastolic_blood_pressure_x_smoking_status__current_vs_non_current__interaction__2df_test_AMR,Diastolic_blood_pressure_x_smoking_status__ever_vs_never__interaction__2df_test_AMR,Systolic_blood_pressure_x_smoking_status__current_vs_non_current__interaction__2df_test_AMR,Systolic_blood_pressure_x_smoking_status__ever_vs_never__interaction__2df_test_AMR,Diastolic_blood_pressure_x_smoking_status__curr…	0	0	0	0	0	EBNA2_open_Chromatin	chr10	115720288	115720922	310
chr10	115720674	115720674	rs180941	Diastolic_blood_pressure_x_smoking_status__current_vs_non_current__interaction__2df_test_EUR,Diastolic_blood_pressure_x_smoking_status__ever_vs_never__interaction__2df_test_EUR,Systolic_blood_pressure_x_smoking_status__current_vs_non_current__interaction__2df_test_EUR,Systolic_blood_pressure_x_smoking_status__ever_vs_never__interaction__2df_test_EUR	0	0	0	0	0	EBNA2_open_Chromatin	chr10	115720288	115720922	310
chr10	117114966	117114966	rs10885696	General_risk_tolerance__MTAG_EUR	0	0	0	0	0	EBNA2_open_Chromatin	chr10	117114761	117114984	116
chr10	126292655	126292655	rs12779301	Acute_lymphoblastic_leukemia_in_childhood__B_cell_precursor_EUR	0	0	0	0	0	EBNA2_gain_loop	chr10	126283785	126296748	loop_1883
chr10	126292738	126292738	rs12779515	Acute_lymphoblastic_leukemia_in_childhood__B_cell_precursor_EUR	0	0	0	0	0	EBNA2_gain_loop	chr10	126283785	126296748	loop_1883
chr10	126293309	126293309	rs35837782	Acute_lymphoblastic_leukemia_in_childhood__B_cell_precursor_EUR	0	0	0	0	0	EBNA2_gain_loop	chr10	126283785	126296748	loop_1883
chr10	126293359	126293359	rs12765129	Acute_lymphoblastic_leukemia_in_childhood__B_cell_precursor_EUR	0	0	0	0	0	EBNA2_gain_loop	chr10	126283785	126296748	loop_1883
chr10	126294284	126294284	rs12771808	Acute_lymphoblastic_leukemia_in_childhood__B_cell_precursor_EUR	0	0	0	0	0	EBNA2_gain_loop	chr10	126283785	126296748	loop_1883
chr10	126294480	126294480	rs12777136	Acute_lymphoblastic_leukemia_in_childhood__B_cell_precursor_EUR	0	0	0	0	0	EBNA2_gain_loop	chr10	126283785	126296748	loop_1883
chr10	126295555	126295555	rs7923479	Acute_lymphoblastic_leukemia_in_childhood__B_cell_precursor_EUR	0	0	0	0	0	EBNA2_gain_loop	chr10	126283785	126296748	loop_1883
chr10	126679739	126679739	rs7902120	Creatine_kinase_levels_EAS	0	0	0	0	0	EBNA2_gain_loop	chr10	126677397	126680319	loop_1882
chr10	134145420	134145420	rs56274613	Number_of_sexual_partners_EUR	0	0	0	0	0	EBNA2_gain_loop	chr10	134144251	134147825	loop_1887
chr10	134145452	134145452	rs55737604	Number_of_sexual_partners_EUR	0	0	0	0	0	EBNA2_gain_loop	chr10	134144251	134147825	loop_1887
chr10	134146006	134146006	rs4526701	Number_of_sexual_partners_EUR	0	0	0	0	0	EBNA2_gain_loop	chr10	134144251	134147825	loop_1887
chr10	134409693	134409693	rs12770777	Systolic_blood_pressure_AFR,Pulse_pressure_AMR,Systolic_blood_pressure_AMR,Pulse_pressure_EAS,Systolic_blood_pressure_EAS,Pulse_pressure_EUR,Systolic_blood_pressure_EUR	0	0	0	0	0	EBNA2_gain_loop	chr10	134405282	134409880	loop_1889
chr11	307696	307696	rs7480524	Granulocyte_percentage_of_myeloid_white_cells_EUR,Monocyte_percentage_of_white_cells_EUR,Neutrophil_percentage_of_white_cells_EUR	0	0	1	0	0	EBNA2_up_genes	chr11	307606	308606	IFITM2
chr11	307961	307961	rs3888187	White_blood_cell_count__basophil_EUR	0	0	1	0	0	EBNA2_up_genes	chr11	307606	308606	IFITM2
chr11	307972	307972	rs4029213	Granulocyte_count_EUR,Lymphocyte_percentage_of_white_cells_EUR,Myeloid_white_cell_count_EUR,Neutrophil_count_EUR,Sum_basophil_neutrophil_counts_EUR,Sum_neutrophil_eosinophil_counts_EUR,White_blood_cell_count_EUR	0	0	1	0	0	EBNA2_up_genes	chr11	307606	308606	IFITM2
chr11	307999	307999	rs28521954	Granulocyte_count_EUR,Lymphocyte_percentage_of_white_cells_EUR,Myeloid_white_cell_count_EUR,Neutrophil_count_EUR,Sum_basophil_neutrophil_counts_EUR,Sum_neutrophil_eosinophil_counts_EUR,White_blood_cell_count_EUR	0	0	1	0	0	EBNA2_up_genes	chr11	307606	308606	IFITM2
chr11	308065	308065	rs9704108	Platelet_count_EUR	0	0	0	0	0	EBNA2_up_genes	chr11	307606	308606	IFITM2
chr11	308314	308314	rs14408	Granulocyte_count_EUR,Lymphocyte_percentage_of_white_cells_EUR,Myeloid_white_cell_count_EUR,Neutrophil_count_EUR,Sum_basophil_neutrophil_counts_EUR,Sum_neutrophil_eosinophil_counts_EUR,White_blood_cell_count_EUR	0	0	1	0	0	EBNA2_up_genes	chr11	307606	308606	IFITM2
chr11	308363	308363	rs1058935	Granulocyte_percentage_of_myeloid_white_cells_EUR,Monocyte_percentage_of_white_cells_EUR,Neutrophil_percentage_of_white_cells_EUR	0	0	1	0	0	EBNA2_up_genes	chr11	307606	308606	IFITM2
chr11	308426	308426	rs1058964	Granulocyte_percentage_of_myeloid_white_cells_EUR,Monocyte_percentage_of_white_cells_EUR,Neutrophil_percentage_of_white_cells_EUR	0	0	1	0	0	EBNA2_up_genes	chr11	307606	308606	IFITM2
chr11	1873232	1873232	rs56344095	Bladder_cancer_EUR,Inflammatory_bowel_disease_EUR,Ulcerative_colitis_EUR	0	0	1	0	1	EBNA2_gain_loop	chr11	1871848	1875385	loop_1897
chr11	1874072	1874072	rs907611	Bladder_cancer_EUR,Inflammatory_bowel_disease_EUR,Ulcerative_colitis_EUR	0	0	1	0	1	EBNA2_gain_loop	chr11	1871848	1875385	loop_1897
chr11	1874072	1874072	rs907611	Bladder_cancer_EUR,Inflammatory_bowel_disease_EUR,Ulcerative_colitis_EUR	0	0	1	0	1	EBNA2_allelic	chr11	1874071	1874072	rs907611
chr11	1874221	1874221	rs907612	Granulocyte_percentage_of_myeloid_white_cells_EUR,Monocyte_count_EUR,Monocyte_percentage_of_white_cells_EUR	0	0	1	0	0	EBNA2_gain_loop	chr11	1871848	1875385	loop_1897
chr11	1874292	1874292	rs907613	Bladder_cancer_EUR,Inflammatory_bowel_disease_EUR,Ulcerative_colitis_EUR	0	0	1	0	1	EBNA2_gain_loop	chr11	1871848	1875385	loop_1897
chr11	1875067	1875067	rs11041476	Bladder_cancer_EUR,Inflammatory_bowel_disease_EUR,Ulcerative_colitis_EUR	0	0	1	0	1	EBNA2_gain_loop	chr11	1871848	1875385	loop_1897
chr11	8615632	8615632	rs7934396	Body_mass_index_age_lessthan_50_EUR,Body_mass_index_x_sex_x_age_interaction__4df_test_EUR	0	0	0	0	0	EBNA2_open_Chromatin	chr11	8615429	8616130	341
chr11	8615939	8615939	rs4620720	Body_mass_index_age_lessthan_50_EUR,Body_mass_index_x_sex_x_age_interaction__4df_test_EUR	0	0	0	0	0	EBNA2_open_Chromatin	chr11	8615429	8616130	341
chr11	9775091	9775091	rs360139	Coronary_artery_disease_AMR,Diastolic_blood_pressure_EAS,Hypertension_EAS,Mean_arterial_pressure_EAS,Mean_corpuscular_volume_EAS,High_light_scatter_reticulocyte_percentage_of_red_cells_EUR,Mean_corpuscular_hemoglobin_concentration_EUR,Reticulocyte_count_EUR,Reticulocyte_fraction_of_red_cells_EUR,Coronary_artery_disease_SAS	0	0	0	0	0	EBNA2_loss_loop	chr11	9774262	9781642	loop_25
chr11	9776567	9776567	rs360140	Diastolic_blood_pressure_AFR,Systolic_blood_pressure_AFR,Diastolic_blood_pressure_AMR,Systolic_blood_pressure_AMR,Systolic_blood_pressure_EAS,High_light_scatter_reticulocyte_percentage_of_red_cells_EUR,Mean_corpuscular_hemoglobin_concentration_EUR,Reticulocyte_count_EUR,Reticulocyte_fraction_of_red_cells_EUR	0	0	0	0	0	EBNA2_loss_loop	chr11	9774262	9781642	loop_25
chr11	9777657	9777657	rs5789616	Diastolic_blood_pressure_AFR,Systolic_blood_pressure_AFR,Diastolic_blood_pressure_AMR,Systolic_blood_pressure_AMR,Systolic_blood_pressure_EAS,High_light_scatter_reticulocyte_percentage_of_red_cells_EUR,Mean_corpuscular_hemoglobin_concentration_EUR,Reticulocyte_count_EUR,Reticulocyte_fraction_of_red_cells_EUR	0	0	0	0	0	EBNA2_loss_loop	chr11	9774262	9781642	loop_25
chr11	9777699	9777699	rs5789617	Diastolic_blood_pressure_AFR,Systolic_blood_pressure_AFR,Diastolic_blood_pressure_AMR,Systolic_blood_pressure_AMR,Systolic_blood_pressure_EAS,High_light_scatter_reticulocyte_percentage_of_red_cells_EUR,Mean_corpuscular_hemoglobin_concentration_EUR,Reticulocyte_count_EUR,Reticulocyte_fraction_of_red_cells_EUR	0	0	0	0	0	EBNA2_loss_loop	chr11	9774262	9781642	loop_25
chr11	9779277	9779277	rs4910499	Coronary_artery_disease_AMR,Coronary_artery_disease_EAS,Diastolic_blood_pressure_EAS,Hypertension_EAS,Mean_arterial_pressure_EAS,Mean_corpuscular_volume_EAS,High_light_scatter_reticulocyte_percentage_of_red_cells_EUR,Mean_corpuscular_hemoglobin_concentration_EUR,Reticulocyte_count_EUR,Reticulocyte_fraction_of_red_cells_EUR,Coronary_artery_disease_SAS	0	0	0	0	0	EBNA2_loss_loop	chr11	9774262	9781642	loop_25
chr11	9779759	9779759	chr11_9779759	Diastolic_blood_pressure_EAS,Pulse_pressure_EAS,Systolic_blood_pressure_EAS	0	0	0	0	0	EBNA2_loss_loop	chr11	9774262	9781642	loop_25
chr11	10330045	10330045	rs4077089	Diastolic_blood_pressure_EAS,Pulse_pressure_EAS,Systolic_blood_pressure_EAS,Pulse_pressure_EUR,Systolic_blood_pressure_EUR	0	0	0	0	0	EBNA2_up_genes	chr11	10329359	10330359	CAND1.11
chr11	10337640	10337640	rs7108385	Diastolic_blood_pressure_EAS,Pulse_pressure_EAS,Systolic_blood_pressure_EAS,Pulse_pressure_EUR,Systolic_blood_pressure_EUR	0	0	0	0	0	EBNA2_loss_loop	chr11	10337469	10342283	loop_25
chr11	10338110	10338110	rs7123541	Pulse_pressure_AFR,Systolic_blood_pressure_AFR,Diastolic_blood_pressure_AMR,Pulse_pressure_AMR,Systolic_blood_pressure_AMR,Diastolic_blood_pressure_EAS,Pulse_pressure_EAS,Systolic_blood_pressure_EAS,Pulse_pressure_EUR,Systolic_blood_pressure_EUR	0	0	0	0	0	EBNA2_loss_loop	chr11	10337469	10342283	loop_25
chr11	10338481	10338481	rs72851670	Diastolic_blood_pressure_AMR,Pulse_pressure_AMR,Systolic_blood_pressure_AMR,Diastolic_blood_pressure_EAS,Pulse_pressure_EAS,Systolic_blood_pressure_EAS,Pulse_pressure_EUR,Systolic_blood_pressure_EUR	0	0	0	0	0	EBNA2_loss_loop	chr11	10337469	10342283	loop_25
chr11	10338764	10338764	rs61891764	Diastolic_blood_pressure_EAS,Pulse_pressure_EAS,Systolic_blood_pressure_EAS,Pulse_pressure_EUR,Systolic_blood_pressure_EUR	0	0	0	0	0	EBNA2_loss_loop	chr11	10337469	10342283	loop_25
chr11	10339167	10339167	rs72851674	Diastolic_blood_pressure_EAS,Pulse_pressure_EAS,Systolic_blood_pressure_EAS,Pulse_pressure_EUR,Systolic_blood_pressure_EUR	0	0	0	0	0	EBNA2_loss_loop	chr11	10337469	10342283	loop_25
chr11	10340486	10340486	rs61891767	Diastolic_blood_pressure_EAS,Pulse_pressure_EAS,Systolic_blood_pressure_EAS,Pulse_pressure_EUR,Systolic_blood_pressure_EUR	0	0	0	0	0	EBNA2_loss_loop	chr11	10337469	10342283	loop_25
chr11	10341463	10341463	rs148694854	Diastolic_blood_pressure_AMR,Pulse_pressure_AMR,Systolic_blood_pressure_AMR,Diastolic_blood_pressure_EAS,Pulse_pressure_EAS,Systolic_blood_pressure_EAS,Pulse_pressure_EUR,Systolic_blood_pressure_EUR	0	0	0	0	0	EBNA2_loss_loop	chr11	10337469	10342283	loop_25
chr11	10342005	10342005	rs111879036	Pulse_pressure_AFR,Systolic_blood_pressure_AFR	0	0	0	0	0	EBNA2_loss_loop	chr11	10337469	10342283	loop_25
chr11	17298125	17298125	rs214088	Blood_protein_levels_EUR	0	0	0	0	0	EBNA2_up_genes	chr11	17297785	17298785	NUCB2
chr11	17298365	17298365	rs214087	Systolic_blood_pressure_x_alcohol_consumption_interaction__2df_test_EAS	0	0	0	0	0	EBNA2_up_genes	chr11	17297785	17298785	NUCB2
chr11	17298656	17298656	rs214085	Systolic_blood_pressure_x_alcohol_consumption_interaction__2df_test_EAS	0	0	0	0	0	EBNA2_up_genes	chr11	17297785	17298785	NUCB2
chr11	17411020	17411020	rs35271178	Mean_arterial_pressure_AMR,Pulse_pressure_AMR,Systolic_blood_pressure_AMR,Systolic_blood_pressure_x_alcohol_consumption_interaction__2df_test_AMR,Type_2_diabetes_AMR,Type_2_diabetes__adjusted_for_BMI_AMR,Body_mass_index_EAS,Pulse_pressure_EAS,Systolic_blood_pressure_EAS,Systolic_blood_pressure_x_alcohol_consumption_interaction__2df_test_EAS,Type_2_diabetes_EAS,Type_2_diabetes__adjusted_for_BMI_EAS	0	0	1	0	0	EBNA2_gain_loop	chr11	17410546	17413878	loop_1911
chr11	17411821	17411821	rs2074314	Mean_arterial_pressure_AFR,Systolic_blood_pressure_AFR,Systolic_blood_pressure_x_alcohol_consumption_interaction__2df_test_AFR,Type_2_diabetes_AFR,Type_2_diabetes__adjusted_for_BMI_AFR,Mean_arterial_pressure_AMR,Pulse_pressure_AMR,Systolic_blood_pressure_AMR,Systolic_blood_pressure_x_alcohol_consumption_interaction__2df_test_AMR,Type_2_diabetes_AMR,Type_2_diabetes__adjusted_for_BMI_AMR,Body_mass_…	0	0	1	0	0	EBNA2_gain_loop	chr11	17410546	17413878	loop_1911
chr11	17412960	17412960	rs7124355	Mean_arterial_pressure_AMR,Pulse_pressure_AMR,Systolic_blood_pressure_AMR,Systolic_blood_pressure_x_alcohol_consumption_interaction__2df_test_AMR,Type_2_diabetes_AMR,Type_2_diabetes__adjusted_for_BMI_AMR,Body_mass_index_EAS,Pulse_pressure_EAS,Systolic_blood_pressure_EAS,Systolic_blood_pressure_x_alcohol_consumption_interaction__2df_test_EAS,Type_2_diabetes_EAS,Type_2_diabetes__adjusted_for_BMI_EAS	0	0	1	0	0	EBNA2_gain_loop	chr11	17410546	17413878	loop_1911
chr11	17421860	17421860	rs2074311	Mean_arterial_pressure_AMR,Type_2_diabetes_AMR,Type_2_diabetes__adjusted_for_BMI_AMR,Body_mass_index_EAS,Type_2_diabetes_EAS,Type_2_diabetes__adjusted_for_BMI_EAS	0	0	1	0	0	EBNA2_gain_loop	chr11	17420773	17424487	loop_1911
chr11	17421886	17421886	rs2074310	Mean_arterial_pressure_AMR,Pulse_pressure_AMR,Systolic_blood_pressure_AMR,Systolic_blood_pressure_x_alcohol_consumption_interaction__2df_test_AMR,Type_2_diabetes_AMR,Type_2_diabetes__adjusted_for_BMI_AMR,Body_mass_index_EUR,Mean_arterial_pressure_EUR,Pulse_pressure_EUR,Systolic_blood_pressure_EUR,Systolic_blood_pressure_x_alcohol_consumption_interaction__2df_test_EUR,Type_2_diabetes_EUR,Type_2_di…	0	0	1	0	0	EBNA2_gain_loop	chr11	17420773	17424487	loop_1911
chr11	19734283	19734283	rs7117165	Monobrow_EUR	0	0	0	0	0	EBNA2_closed_chromatin	chr11	19734155	19734613	245
chr11	19734283	19734283	rs7117165	Monobrow_EUR	0	0	0	0	0	EBNA2_closed_chromatin	chr11	19734161	19734564	245
chr11	33913568	33913568	rs2273799	Mean_corpuscular_hemoglobin_EUR,Mean_corpuscular_volume_EUR,Red_blood_cell_count_EUR	0	0	0	0	0	EBNA2_up_genes	chr11	33913335	33914335	LMO2
chr11	35294186	35294186	rs3794102	Vitiligo_EUR	1	0	1	0	0	EBNA2_allelic	chr11	35294185	35294186	rs3794102
chr11	43902681	43902681	rs34239319	Chronotype_EUR,Morning_person_EUR	0	0	0	0	0	EBNA2_down_genes	chr11	43901856	43902856	ALKBH3
chr11	43902836	43902836	rs34070018	Chronotype_EUR,Morning_person_EUR	0	0	0	0	0	EBNA2_down_genes	chr11	43901856	43902856	ALKBH3
chr11	47236294	47236294	rs3758666	Feeling_fed_up_EUR	0	0	0	0	0	EBNA2_loss_loop	chr11	47236078	47238131	loop_26
chr11	47236294	47236294	rs3758666	Feeling_fed_up_EUR	0	0	0	0	0	EBNA2_down_genes	chr11	47235992	47236992	DDB2
chr11	47236298	47236298	rs3758667	Feeling_fed_up_EUR	0	0	0	0	0	EBNA2_loss_loop	chr11	47236078	47238131	loop_26
chr11	47236298	47236298	rs3758667	Feeling_fed_up_EUR	0	0	0	0	0	EBNA2_down_genes	chr11	47235992	47236992	DDB2
chr11	47236405	47236405	rs4237547	Feeling_miserable_EUR,Heel_bone_mineral_density_EUR	0	0	0	0	0	EBNA2_loss_loop	chr11	47236078	47238131	loop_26
chr11	47236405	47236405	rs4237547	Feeling_miserable_EUR,Heel_bone_mineral_density_EUR	0	0	0	0	0	EBNA2_down_genes	chr11	47235992	47236992	DDB2
chr11	47290759	47290759	rs1449626	High_density_lipoprotein_cholesterol_levels_AFR,High_density_lipoprotein_cholesterol_levels_AMR,Pulse_pressure_AMR,High_density_lipoprotein_cholesterol_levels_EAS,Pulse_pressure_EAS,Cognitive_performance__MTAG_EUR,HDL_cholesterol_EUR,High_density_lipoprotein_cholesterol_levels_EUR,Lymphocyte_percentage_of_white_cells_EUR,Pulse_pressure_EUR,Self_reported_math_ability_EUR,Self_reported_math_ability…	0	0	1	0	0	EBNA2_gain_loop	chr11	47290361	47292527	loop_1923
chr11	47290759	47290759	rs1449626	High_density_lipoprotein_cholesterol_levels_AFR,High_density_lipoprotein_cholesterol_levels_AMR,Pulse_pressure_AMR,High_density_lipoprotein_cholesterol_levels_EAS,Pulse_pressure_EAS,Cognitive_performance__MTAG_EUR,HDL_cholesterol_EUR,High_density_lipoprotein_cholesterol_levels_EUR,Lymphocyte_percentage_of_white_cells_EUR,Pulse_pressure_EUR,Self_reported_math_ability_EUR,Self_reported_math_ability…	0	0	1	0	0	EBNA2_loss_loop	chr11	47290361	47292527	loop_26
chr11	47290984	47290984	rs1449627	Glaucoma__primary_open_angle_AFR,Triglycerides_AFR,Glaucoma__primary_open_angle_AMR,HDL_cholesterol_x_physical_activity_interaction__2df_test_AMR,Triglycerides_AMR,Glaucoma__primary_open_angle_EAS,HDL_cholesterol_levels_EAS,Glaucoma__primary_open_angle_EUR,HDL_cholesterol_levels_EUR,HDL_cholesterol_x_physical_activity_interaction__2df_test_EUR,Triglycerides_EUR	0	0	0	0	0	EBNA2_gain_loop	chr11	47290361	47292527	loop_1923
chr11	47290984	47290984	rs1449627	Glaucoma__primary_open_angle_AFR,Triglycerides_AFR,Glaucoma__primary_open_angle_AMR,HDL_cholesterol_x_physical_activity_interaction__2df_test_AMR,Triglycerides_AMR,Glaucoma__primary_open_angle_EAS,HDL_cholesterol_levels_EAS,Glaucoma__primary_open_angle_EUR,HDL_cholesterol_levels_EUR,HDL_cholesterol_x_physical_activity_interaction__2df_test_EUR,Triglycerides_EUR	0	0	0	0	0	EBNA2_loss_loop	chr11	47290361	47292527	loop_26
chr11	47291817	47291817	rs142960070	Glaucoma__primary_open_angle_AFR,Triglycerides_AFR,Glaucoma__primary_open_angle_AMR,HDL_cholesterol_x_physical_activity_interaction__2df_test_AMR,Triglycerides_AMR,Glaucoma__primary_open_angle_EAS,HDL_cholesterol_levels_EAS,Glaucoma__primary_open_angle_EUR,HDL_cholesterol_levels_EUR,HDL_cholesterol_x_physical_activity_interaction__2df_test_EUR,Triglycerides_EUR	0	0	0	0	0	EBNA2_gain_loop	chr11	47290361	47292527	loop_1923
chr11	47291817	47291817	rs142960070	Glaucoma__primary_open_angle_AFR,Triglycerides_AFR,Glaucoma__primary_open_angle_AMR,HDL_cholesterol_x_physical_activity_interaction__2df_test_AMR,Triglycerides_AMR,Glaucoma__primary_open_angle_EAS,HDL_cholesterol_levels_EAS,Glaucoma__primary_open_angle_EUR,HDL_cholesterol_levels_EUR,HDL_cholesterol_x_physical_activity_interaction__2df_test_EUR,Triglycerides_EUR	0	0	0	0	0	EBNA2_loss_loop	chr11	47290361	47292527	loop_26
chr11	47292237	47292237	rs1055510	Glaucoma__primary_open_angle_AFR,Triglycerides_AFR,Glaucoma__primary_open_angle_AMR,HDL_cholesterol_x_physical_activity_interaction__2df_test_AMR,Triglycerides_AMR,Glaucoma__primary_open_angle_EAS,HDL_cholesterol_levels_EAS,Glaucoma__primary_open_angle_EUR,HDL_cholesterol_levels_EUR,HDL_cholesterol_x_physical_activity_interaction__2df_test_EUR,Triglycerides_EUR	0	0	0	0	0	EBNA2_gain_loop	chr11	47290361	47292527	loop_1923
chr11	47292237	47292237	rs1055510	Glaucoma__primary_open_angle_AFR,Triglycerides_AFR,Glaucoma__primary_open_angle_AMR,HDL_cholesterol_x_physical_activity_interaction__2df_test_AMR,Triglycerides_AMR,Glaucoma__primary_open_angle_EAS,HDL_cholesterol_levels_EAS,Glaucoma__primary_open_angle_EUR,HDL_cholesterol_levels_EUR,HDL_cholesterol_x_physical_activity_interaction__2df_test_EUR,Triglycerides_EUR	0	0	0	0	0	EBNA2_loss_loop	chr11	47290361	47292527	loop_26
chr11	47398963	47398963	rs12146565	BMI__adjusted_for_smoking_behaviour_EAS,BMI_in_non_smokers_EAS,Body_mass_index_EAS,Body_mass_index__joint_analysis_main_effects_and_physical_activity_interaction_EAS,Body_mass_index__joint_analysis_main_effects_and_smoking_interaction_EAS,Body_mass_index_in_physically_active_individuals_EAS,Alcohol_consumption__drinks_per_week_EUR,Alcohol_consumption__drinks_per_week___MTAG_EUR,Cognitive_performa…	0	0	0	0	0	EBNA2_gain_loop	chr11	47398050	47402068	loop_1918
chr11	47399602	47399602	rs2278890	Alzheimer_s_disease_or_family_history_of_Alzheimer_s_disease_EUR,Diastolic_blood_pressure_EUR,Estimated_glomerular_filtration_rate_EUR	0	0	0	0	0	EBNA2_gain_loop	chr11	47398050	47402068	loop_1918
chr11	47400602	47400602	rs3758675	Alzheimer_s_disease_or_family_history_of_Alzheimer_s_disease_EUR,Diastolic_blood_pressure_EUR,Estimated_glomerular_filtration_rate_EUR	0	0	0	0	0	EBNA2_gain_loop	chr11	47398050	47402068	loop_1918
chr11	47401058	47401058	rs11601173	BMI__adjusted_for_smoking_behaviour_AMR,BMI_in_non_smokers_AMR,Body_mass_index_AMR,Body_mass_index__joint_analysis_main_effects_and_smoking_interaction_AMR,BMI__adjusted_for_smoking_behaviour_EAS,BMI_in_non_smokers_EAS,Body_mass_index_EAS,Body_mass_index__joint_analysis_main_effects_and_physical_activity_interaction_EAS,Body_mass_index__joint_analysis_main_effects_and_smoking_interaction_EAS,Body…	0	0	0	0	0	EBNA2_gain_loop	chr11	47398050	47402068	loop_1918
chr11	47401060	47401060	rs11607981	BMI__adjusted_for_smoking_behaviour_AMR,BMI_in_non_smokers_AMR,Body_mass_index_AMR,Body_mass_index__joint_analysis_main_effects_and_smoking_interaction_AMR,BMI__adjusted_for_smoking_behaviour_EAS,BMI_in_non_smokers_EAS,Body_mass_index_EAS,Body_mass_index__joint_analysis_main_effects_and_physical_activity_interaction_EAS,Body_mass_index__joint_analysis_main_effects_and_smoking_interaction_EAS,Body…	0	0	0	0	0	EBNA2_gain_loop	chr11	47398050	47402068	loop_1918
chr11	47401171	47401171	rs11601603	BMI__adjusted_for_smoking_behaviour_AMR,BMI_in_non_smokers_AMR,Body_mass_index_AMR,Body_mass_index__joint_analysis_main_effects_and_smoking_interaction_AMR,BMI__adjusted_for_smoking_behaviour_EAS,BMI_in_non_smokers_EAS,Body_mass_index_EAS,Body_mass_index__joint_analysis_main_effects_and_physical_activity_interaction_EAS,Body_mass_index__joint_analysis_main_effects_and_smoking_interaction_EAS,Body…	0	0	0	0	0	EBNA2_gain_loop	chr11	47398050	47402068	loop_1918
chr11	47401448	47401448	rs56276917	Systolic_blood_pressure_AMR,Diastolic_blood_pressure_EAS,Systolic_blood_pressure_EAS,Global_electrical_heterogeneity_phenotypes_EUR,Systolic_blood_pressure_EUR	0	0	0	0	0	EBNA2_gain_loop	chr11	47398050	47402068	loop_1918
chr11	47428565	47428565	rs4752999	BMI__adjusted_for_smoking_behaviour_AMR,BMI_in_non_smokers_AMR,Body_mass_index_AMR,Body_mass_index__joint_analysis_main_effects_and_smoking_interaction_AMR,BMI__adjusted_for_smoking_behaviour_EAS,BMI_in_non_smokers_EAS,Body_mass_index_EAS,Body_mass_index__joint_analysis_main_effects_and_physical_activity_interaction_EAS,Body_mass_index__joint_analysis_main_effects_and_smoking_interaction_EAS,Body…	0	0	0	0	0	EBNA2_gain_loop	chr11	47428268	47431848	loop_1923
chr11	47429245	47429245	rs7107726	BMI__adjusted_for_smoking_behaviour_AMR,BMI_in_non_smokers_AMR,Body_mass_index_AMR,Body_mass_index__joint_analysis_main_effects_and_smoking_interaction_AMR,BMI__adjusted_for_smoking_behaviour_EAS,BMI_in_non_smokers_EAS,Body_mass_index_EAS,Body_mass_index__joint_analysis_main_effects_and_physical_activity_interaction_EAS,Body_mass_index__joint_analysis_main_effects_and_smoking_interaction_EAS,Body…	0	0	0	0	0	EBNA2_gain_loop	chr11	47428268	47431848	loop_1923
chr11	47429904	47429904	rs7947450	Estimated_glomerular_filtration_rate_AFR,Estimated_glomerular_filtration_rate_AMR,Estimated_glomerular_filtration_rate_EAS,Glomerular_filtration_rate_EAS,Alzheimer_s_disease_or_family_history_of_Alzheimer_s_disease_EUR,Diastolic_blood_pressure_EUR,Estimated_glomerular_filtration_rate_EUR	0	0	0	0	0	EBNA2_gain_loop	chr11	47428268	47431848	loop_1923
chr11	47430192	47430192	chr11_47430192	BMI__adjusted_for_smoking_behaviour_AMR,BMI_in_non_smokers_AMR,Body_mass_index_AMR,Body_mass_index__joint_analysis_main_effects_and_smoking_interaction_AMR,BMI__adjusted_for_smoking_behaviour_EAS,BMI_in_non_smokers_EAS,Body_mass_index_EAS,Body_mass_index__joint_analysis_main_effects_and_physical_activity_interaction_EAS,Body_mass_index__joint_analysis_main_effects_and_smoking_interaction_EAS,Body…	0	0	0	0	0	EBNA2_gain_loop	chr11	47428268	47431848	loop_1923
chr11	47430458	47430458	rs7937331	BMI__adjusted_for_smoking_behaviour_EAS,BMI_in_non_smokers_EAS,Body_mass_index_EAS,Body_mass_index__joint_analysis_main_effects_and_physical_activity_interaction_EAS,Body_mass_index__joint_analysis_main_effects_and_smoking_interaction_EAS,Body_mass_index_in_physically_active_individuals_EAS,Alcohol_consumption__drinks_per_week_EUR,Alcohol_consumption__drinks_per_week___MTAG_EUR,Cognitive_performa…	0	0	0	0	0	EBNA2_gain_loop	chr11	47428268	47431848	loop_1923
chr11	47430599	47430599	rs11039225	Estimated_glomerular_filtration_rate_AFR,Estimated_glomerular_filtration_rate_AMR,Estimated_glomerular_filtration_rate_EAS,Glomerular_filtration_rate_EAS,Alzheimer_s_disease_or_family_history_of_Alzheimer_s_disease_EUR,Diastolic_blood_pressure_EUR,Estimated_glomerular_filtration_rate_EUR	0	0	0	0	0	EBNA2_gain_loop	chr11	47428268	47431848	loop_1923
chr11	47431529	47431529	rs753812	Systolic_blood_pressure_AMR,Pulse_pressure_EAS,Cognitive_performance_EUR,Multiple_sclerosis_EUR,Systolic_blood_pressure_EUR	1	0	1	0	0	EBNA2_gain_loop	chr11	47428268	47431848	loop_1923
chr11	47600438	47600438	rs2280231	Alcohol_use_disorder__consumption_score_EUR,Alzheimer_s_disease__late_onset_EUR,Body_fat_distribution__arm_fat_ratio_EUR,Body_fat_distribution__leg_fat_ratio_EUR,Body_fat_distribution__trunk_fat_ratio_EUR,Hand_grip_strength_EUR	0	0	0	0	0	EBNA2_gain_loop	chr11	47599481	47602458	loop_1925
chr11	47662932	47662932	rs7120548	Estimated_glomerular_filtration_rate_EAS,Glomerular_filtration_rate_EAS,Alcohol_use_disorder__consumption_score_EUR,Alcohol_use_disorder__total_score_EUR,Alzheimer_s_disease__late_onset_EUR,Body_fat_distribution__arm_fat_ratio_EUR,Body_fat_distribution__leg_fat_ratio_EUR,Body_fat_distribution__trunk_fat_ratio_EUR,Hand_grip_strength_EUR,Hip_circumference_EUR,Waist_circumference_EUR	0	0	0	0	0	EBNA2_gain_loop	chr11	47662683	47665297	loop_1925
chr11	47663049	47663049	rs10838738	BMI__adjusted_for_smoking_behaviour_AMR,BMI_in_non_smokers_AMR,Body_mass_index_AMR,Body_mass_index__joint_analysis_main_effects_and_smoking_interaction_AMR,BMI__adjusted_for_smoking_behaviour_EAS,BMI_in_non_smokers_EAS,Body_mass_index_EAS,Body_mass_index__joint_analysis_main_effects_and_physical_activity_interaction_EAS,Body_mass_index__joint_analysis_main_effects_and_smoking_interaction_EAS,Body…	0	0	0	0	0	EBNA2_gain_loop	chr11	47662683	47665297	loop_1925
chr11	48130794	48130794	rs11039520	Systolic_blood_pressure_EUR	0	0	0	0	0	EBNA2_gain_loop	chr11	48129867	48132307	loop_1929
chr11	57194155	57194155	rs11822095	Platelet_distribution_width_EUR	0	0	0	0	0	EBNA2_gain_loop	chr11	57191997	57195463	loop_1930
chr11	57195235	57195235	rs17159355	Platelet_distribution_width_EUR	0	0	0	0	0	EBNA2_gain_loop	chr11	57191997	57195463	loop_1930
chr11	57195237	57195237	rs17151908	Platelet_distribution_width_EUR	0	0	0	0	0	EBNA2_gain_loop	chr11	57191997	57195463	loop_1930
chr11	61594920	61594920	rs3834458	HDL_cholesterol_AFR,High_density_lipoprotein_cholesterol_levels_AFR,LDL_cholesterol_AFR,LDL_cholesterol_x_physical_activity_interaction__2df_test_AFR,Low_density_lipoprotein_cholesterol_levels_AFR,Resting_heart_rate_AFR,Total_cholesterol_levels_AFR,Triglycerides_AFR,HDL_cholesterol_AMR,High_density_lipoprotein_cholesterol_levels_AMR,Iron_status_biomarkers__total_iron_binding_capacity_AMR,LDL_chol…	1	1	1	1	1	EBNA2_gain_loop	chr11	61594295	61597215	loop_1946
chr11	61595564	61595564	rs968567	Blond_vs__brown_black_hair_color_EUR,Neutrophil_count_EUR,Rheumatoid_arthritis_EUR,Sum_basophil_neutrophil_counts_EUR	1	1	1	0	1	EBNA2_gain_loop	chr11	61594295	61597215	loop_1946
chr11	61596322	61596322	rs5792235	HDL_cholesterol_AMR,High_density_lipoprotein_cholesterol_levels_AMR,Iron_status_biomarkers__total_iron_binding_capacity_AMR,LDL_cholesterol_AMR,LDL_cholesterol_x_physical_activity_interaction__2df_test_AMR,Low_density_lipoprotein_cholesterol_levels_AMR,Pulse_pressure_AMR,Total_cholesterol_levels_AMR,Triglycerides_AMR,Bipolar_disorder_EAS,Colorectal_cancer_EAS,Colorectal_cancer_or_advanced_adenoma…	1	1	1	1	1	EBNA2_gain_loop	chr11	61594295	61597215	loop_1946
chr11	61596633	61596633	rs99780	HDL_cholesterol_AMR,High_density_lipoprotein_cholesterol_levels_AMR,Iron_status_biomarkers__total_iron_binding_capacity_AMR,LDL_cholesterol_AMR,LDL_cholesterol_x_physical_activity_interaction__2df_test_AMR,Low_density_lipoprotein_cholesterol_levels_AMR,Pulse_pressure_AMR,Total_cholesterol_levels_AMR,Triglycerides_AMR,Bipolar_disorder_EAS,Colorectal_cancer_EAS,Colorectal_cancer_or_advanced_adenoma…	1	1	1	1	1	EBNA2_gain_loop	chr11	61594295	61597215	loop_1946
chr11	61597212	61597212	rs174570	LDL_cholesterol_x_physical_activity_interaction__2df_test_AMR,Low_density_lipoprotein_cholesterol_levels_AMR,Total_cholesterol_levels_AMR,Bipolar_disorder_EAS,Colorectal_cancer_EAS,Colorectal_cancer_or_advanced_adenoma_EAS,HDL_cholesterol_levels_EAS,Heart_rate_EAS,Height_EAS,Hemoglobin_A1c_levels_EAS,High_density_lipoprotein_cholesterol_levels_EAS,LDL_cholesterol_levels_EAS,LDL_cholesterol_x_phys…	0	0	0	0	0	EBNA2_gain_loop	chr11	61594295	61597215	loop_1946
chr11	61600327	61600327	rs174573	LDL_cholesterol_x_physical_activity_interaction__2df_test_AFR	0	0	0	0	0	EBNA2_gain_loop	chr11	61599870	61603091	loop_1946
chr11	61600342	61600342	rs174574	HDL_cholesterol_AMR,High_density_lipoprotein_cholesterol_levels_AMR,Iron_status_biomarkers__total_iron_binding_capacity_AMR,LDL_cholesterol_AMR,LDL_cholesterol_x_physical_activity_interaction__2df_test_AMR,Low_density_lipoprotein_cholesterol_levels_AMR,Pulse_pressure_AMR,Total_cholesterol_levels_AMR,Triglycerides_AMR,Bipolar_disorder_EAS,Colorectal_cancer_EAS,Colorectal_cancer_or_advanced_adenoma…	1	1	1	1	1	EBNA2_gain_loop	chr11	61599870	61603091	loop_1946
chr11	61601378	61601378	rs2524296	Albumin_globulin_ratio_EAS,Non_albumin_protein_levels_EAS	0	0	0	0	0	EBNA2_gain_loop	chr11	61599870	61603091	loop_1946
chr11	61601872	61601872	rs2845574	Albumin_globulin_ratio_EAS,Non_albumin_protein_levels_EAS	0	0	0	0	0	EBNA2_gain_loop	chr11	61599870	61603091	loop_1946
chr11	61601908	61601908	rs2845573	Albumin_globulin_ratio_EAS,Non_albumin_protein_levels_EAS	0	0	0	0	0	EBNA2_gain_loop	chr11	61599870	61603091	loop_1946
chr11	61602458	61602458	rs138766446	Albumin_globulin_ratio_EAS,Non_albumin_protein_levels_EAS	0	0	0	0	0	EBNA2_gain_loop	chr11	61599870	61603091	loop_1946
chr11	62325272	62325272	rs7930896	FEV1_EUR,Heel_bone_mineral_density_EUR,Lung_function__FEV1_EUR,Lung_function__FVC_EUR,Waist_to_hip_ratio_adjusted_for_BMI_EUR,Waist_to_hip_ratio_adjusted_for_body_mass_index_EUR	0	0	0	0	0	EBNA2_loss_loop	chr11	62322849	62325525	loop_27
chr11	62325435	62325435	rs11440399	Waist_to_hip_ratio_adjusted_for_body_mass_index_AFR,Waist_to_hip_ratio_adjusted_for_body_mass_index_EAS,FEV1_EUR,Heel_bone_mineral_density_EUR,Lung_function__FEV1_EUR,Lung_function__FVC_EUR,Waist_to_hip_ratio_adjusted_for_BMI_EUR,Waist_to_hip_ratio_adjusted_for_body_mass_index_EUR	0	0	0	0	0	EBNA2_loss_loop	chr11	62322849	62325525	loop_27
chr11	62334096	62334096	rs7124057	Waist_to_hip_ratio_adjusted_for_body_mass_index_EAS,FEV1_EUR,Heel_bone_mineral_density_EUR,Lung_function__FEV1_EUR,Lung_function__FVC_EUR,Waist_to_hip_ratio_adjusted_for_BMI_EUR,Waist_to_hip_ratio_adjusted_for_body_mass_index_EUR	0	0	0	0	0	EBNA2_gain_loop	chr11	62333785	62336126	loop_1950
chr11	62334908	62334908	rs1061093	Waist_to_hip_ratio_adjusted_for_body_mass_index_AFR,Waist_to_hip_ratio_adjusted_for_body_mass_index_EAS,FEV1_EUR,Heel_bone_mineral_density_EUR,Lung_function__FEV1_EUR,Lung_function__FVC_EUR,Waist_to_hip_ratio_adjusted_for_BMI_EUR,Waist_to_hip_ratio_adjusted_for_body_mass_index_EUR	0	0	0	0	0	EBNA2_gain_loop	chr11	62333785	62336126	loop_1950
chr11	62335765	62335765	rs60098285	Waist_to_hip_ratio_adjusted_for_body_mass_index_EAS	0	0	0	0	0	EBNA2_gain_loop	chr11	62333785	62336126	loop_1950
chr11	62360416	62360416	rs35547596	Waist_to_hip_ratio_adjusted_for_body_mass_index_EAS	0	0	0	0	0	EBNA2_gain_loop	chr11	62357740	62360757	loop_1952
chr11	62378660	62378660	rs12808829	FEV1_EUR,Heel_bone_mineral_density_EUR,Lung_function__FEV1_EUR,Lung_function__FVC_EUR,Waist_to_hip_ratio_adjusted_for_BMI_EUR,Waist_to_hip_ratio_adjusted_for_body_mass_index_EUR	0	0	0	0	0	EBNA2_gain_loop	chr11	62378593	62381317	loop_1952
chr11	62378801	62378801	rs11553576	FEV1_EUR,Heel_bone_mineral_density_EUR,Lung_function__FEV1_EUR,Lung_function__FVC_EUR,Waist_to_hip_ratio_adjusted_for_BMI_EUR,Waist_to_hip_ratio_adjusted_for_body_mass_index_EUR	0	0	0	0	0	EBNA2_gain_loop	chr11	62378593	62381317	loop_1952
chr11	62380027	62380027	rs113222038	Waist_to_hip_ratio_adjusted_for_body_mass_index_EAS,Resting_heart_rate_EUR	0	0	0	0	0	EBNA2_gain_loop	chr11	62378593	62381317	loop_1952
chr11	62380119	62380119	rs12798970	Waist_to_hip_ratio_adjusted_for_body_mass_index_EAS,FEV1_EUR,Heel_bone_mineral_density_EUR,Lung_function__FVC_EUR,Waist_to_hip_ratio_adjusted_for_BMI_EUR,Waist_to_hip_ratio_adjusted_for_body_mass_index_EUR	0	0	0	0	0	EBNA2_gain_loop	chr11	62378593	62381317	loop_1952
chr11	62380425	62380425	rs3923805	Waist_to_hip_ratio_adjusted_for_body_mass_index_EAS,Resting_heart_rate_EUR	0	0	0	0	0	EBNA2_gain_loop	chr11	62378593	62381317	loop_1952
chr11	62412944	62412944	rs11231172	Resting_heart_rate_EAS,Blood_protein_levels_EUR,Resting_heart_rate_EUR	0	0	0	0	0	EBNA2_gain_loop	chr11	62412463	62415018	loop_1957
chr11	62412965	62412965	rs2956995	Resting_heart_rate_EAS	0	0	0	0	0	EBNA2_gain_loop	chr11	62412463	62415018	loop_1957
chr11	62413662	62413662	rs78278641	Cognitive_performance__MTAG_EUR,Educational_attainment__MTAG_EUR,Educational_attainment__years_of_education_EUR,Highest_math_class_taken__MTAG_EUR	0	0	0	0	0	EBNA2_gain_loop	chr11	62412463	62415018	loop_1957
chr11	62413673	62413673	rs118093058	Cognitive_performance__MTAG_EUR,Educational_attainment__MTAG_EUR,Educational_attainment__years_of_education_EUR,Highest_math_class_taken__MTAG_EUR	0	0	0	0	0	EBNA2_gain_loop	chr11	62412463	62415018	loop_1957
chr11	62432815	62432815	rs4489748	Resting_heart_rate_AFR,Resting_heart_rate_EAS,Blood_protein_levels_EUR,Resting_heart_rate_EUR	0	0	0	0	0	EBNA2_gain_loop	chr11	62431495	62433908	loop_1958
chr11	62432815	62432815	rs4489748	Resting_heart_rate_AFR,Resting_heart_rate_EAS,Blood_protein_levels_EUR,Resting_heart_rate_EUR	0	0	0	0	0	EBNA2_loss_loop	chr11	62431495	62433908	loop_28
chr11	62438207	62438207	rs67976459	Resting_heart_rate_EAS,Blood_protein_levels_EUR,Resting_heart_rate_EUR	0	0	0	0	0	EBNA2_gain_loop	chr11	62437675	62440854	loop_1957
chr11	62438498	62438498	rs11231182	Resting_heart_rate_EAS,Blood_protein_levels_EUR,Resting_heart_rate_EUR	0	0	0	0	0	EBNA2_gain_loop	chr11	62437675	62440854	loop_1957
chr11	62438750	62438750	rs17637597	Resting_heart_rate_EAS,Blood_protein_levels_EUR,Resting_heart_rate_EUR	0	0	0	0	0	EBNA2_gain_loop	chr11	62437675	62440854	loop_1957
chr11	62438819	62438819	rs693698	Resting_heart_rate_EAS,Blood_protein_levels_EUR,Resting_heart_rate_EUR	0	0	0	0	0	EBNA2_gain_loop	chr11	62437675	62440854	loop_1957
chr11	62438846	62438846	rs3809079	Resting_heart_rate_EAS,Blood_protein_levels_EUR,Resting_heart_rate_EUR	0	0	0	0	0	EBNA2_gain_loop	chr11	62437675	62440854	loop_1957
chr11	62439569	62439569	rs13941	Resting_heart_rate_EAS,Blood_protein_levels_EUR,Resting_heart_rate_EUR	0	0	0	0	0	EBNA2_gain_loop	chr11	62437675	62440854	loop_1957
chr11	62439976	62439976	rs35548045	Blood_protein_levels_EUR,Resting_heart_rate_EUR	0	0	0	0	0	EBNA2_gain_loop	chr11	62437675	62440854	loop_1957
chr11	62440823	62440823	rs10792356	Resting_heart_rate_EAS,Blood_protein_levels_EUR,Resting_heart_rate_EUR	0	0	0	0	0	EBNA2_gain_loop	chr11	62437675	62440854	loop_1957
chr11	62477339	62477339	rs551162	Smoking_initiation__ever_regular_vs_never_regular___MTAG_EUR	0	0	0	0	0	EBNA2_gain_loop	chr11	62475540	62478653	loop_1960
chr11	63991581	63991581	rs11549690	Cognitive_performance__MTAG_EUR	0	0	0	0	0	EBNA2_gain_loop	chr11	63991356	63995404	loop_1967
chr11	63993679	63993679	rs71045750	Platelet_count_EUR	0	0	0	0	0	EBNA2_gain_loop	chr11	63991356	63995404	loop_1967
chr11	63994692	63994692	rs1860368	Platelet_count_EUR	0	0	0	0	0	EBNA2_gain_loop	chr11	63991356	63995404	loop_1967
chr11	63995302	63995302	rs2429455	Platelet_count_EUR	0	0	0	0	0	EBNA2_gain_loop	chr11	63991356	63995404	loop_1967
chr11	64004723	64004723	rs56271783	Triglycerides_AFR,Waist_to_hip_ratio_adjusted_for_BMI__additive_genetic_model_AFR,HDL_cholesterol_AMR,Triglycerides_AMR,HDL_cholesterol_EUR,Triglycerides_EUR	0	0	0	0	0	EBNA2_gain_loop	chr11	64004614	64009737	loop_1967
chr11	64006292	64006292	rs594942	Platelet_count_EUR	0	0	0	0	0	EBNA2_gain_loop	chr11	64004614	64009737	loop_1967
chr11	64006466	64006466	rs595880	Platelet_count_EUR	0	0	0	0	0	EBNA2_gain_loop	chr11	64004614	64009737	loop_1967
chr11	64007159	64007159	rs58779949	Educational_attainment__MTAG_EUR,Educational_attainment__years_of_education_EUR	0	0	0	0	0	EBNA2_gain_loop	chr11	64004614	64009737	loop_1967
chr11	64007297	64007297	rs57831436	Educational_attainment__MTAG_EUR,Educational_attainment__years_of_education_EUR	0	0	0	0	0	EBNA2_gain_loop	chr11	64004614	64009737	loop_1967
chr11	64012910	64012910	rs60031276	Age_of_smoking_initiation__MTAG_EUR,Alopecia_areata_EUR,Crohn_s_disease_EUR,Multiple_sclerosis_EUR,Psoriasis_vulgaris_EUR,Vitiligo_EUR	1	1	1	0	1	EBNA2_gain_loop	chr11	64012264	64015898	loop_1968
chr11	64037033	64037033	rs876064	Educational_attainment__MTAG_EUR,Educational_attainment__years_of_education_EUR	0	0	0	0	0	EBNA2_gain_loop	chr11	64035784	64038177	loop_1968
chr11	64511050	64511050	rs2073797	Serum_uric_acid_levels_EAS,Urate_levels_EUR	0	0	0	0	0	EBNA2_gain_loop	chr11	64510667	64514646	loop_1970
chr11	64511322	64511322	rs2073798	Serum_uric_acid_levels_EAS,Urate_levels_EUR	0	0	0	0	0	EBNA2_gain_loop	chr11	64510667	64514646	loop_1970
chr11	64511886	64511886	rs12223914	Serum_uric_acid_levels_EAS	0	0	0	0	0	EBNA2_gain_loop	chr11	64510667	64514646	loop_1970
chr11	64514506	64514506	rs569602	Serum_uric_acid_levels_EAS	0	0	0	0	0	EBNA2_gain_loop	chr11	64510667	64514646	loop_1970
chr11	64546106	64546106	rs3741398	Urate_levels_EUR	0	0	0	0	0	EBNA2_gain_loop	chr11	64544255	64548133	loop_1972
chr11	64546257	64546257	rs1633462	Urate_levels_EUR	0	0	0	0	0	EBNA2_gain_loop	chr11	64544255	64548133	loop_1972
chr11	64546391	64546391	rs606458	Urate_levels_EUR	0	0	0	0	0	EBNA2_gain_loop	chr11	64544255	64548133	loop_1972
chr11	64546856	64546856	rs10570870	Urate_levels_EUR	0	0	0	0	0	EBNA2_gain_loop	chr11	64544255	64548133	loop_1972
chr11	64546891	64546891	rs487105	Urate_levels_EUR	0	0	0	0	0	EBNA2_gain_loop	chr11	64544255	64548133	loop_1972
chr11	64546991	64546991	rs593394	Urate_levels_EUR	0	0	0	0	0	EBNA2_gain_loop	chr11	64544255	64548133	loop_1972
chr11	64619320	64619320	rs144850368	Systolic_blood_pressure_x_smoking_status__current_vs_non_current__interaction__2df_test_EAS,Systolic_blood_pressure_x_smoking_status__ever_vs_never__interaction__2df_test_EAS	0	0	0	0	0	EBNA2_gain_loop	chr11	64614661	64621957	loop_1974
chr11	64649222	64649222	rs17789396	Systolic_blood_pressure_x_smoking_status__current_vs_non_current__interaction__2df_test_EAS,Systolic_blood_pressure_x_smoking_status__ever_vs_never__interaction__2df_test_EAS	0	0	0	0	0	EBNA2_gain_loop	chr11	64645699	64651999	loop_1972
chr11	64649222	64649222	rs17789396	Systolic_blood_pressure_x_smoking_status__current_vs_non_current__interaction__2df_test_EAS,Systolic_blood_pressure_x_smoking_status__ever_vs_never__interaction__2df_test_EAS	0	0	0	0	0	EBNA2_loss_loop	chr11	64645699	64651999	loop_29
chr11	64898226	64898226	rs9971407	Blood_protein_levels_EUR	0	0	0	0	0	EBNA2_gain_loop	chr11	64898185	64903411	loop_1980
chr11	65211979	65211979	rs12803915	Glaucoma__primary_open_angle_AMR,Glaucoma__primary_open_angle_EAS	0	0	0	0	0	EBNA2_gain_loop	chr11	65207107	65212125	loop_1991
chr11	65212122	65212122	rs3825071	Glaucoma__primary_open_angle_EAS	0	0	0	0	0	EBNA2_gain_loop	chr11	65207107	65212125	loop_1991
chr11	65238872	65238872	rs71471974	Hip_circumference_adjusted_for_BMI_EUR	0	0	0	0	0	EBNA2_gain_loop	chr11	65238530	65240472	loop_2000
chr11	65240213	65240213	rs10896006	Glaucoma__primary_open_angle_AFR,Glaucoma__primary_open_angle_AMR,Glaucoma__primary_open_angle_EAS,Glaucoma__primary_open_angle_EUR	0	0	0	0	0	EBNA2_gain_loop	chr11	65238530	65240472	loop_2000
chr11	65254025	65254025	rs616599	Hip_circumference_adjusted_for_BMI_EUR	0	0	0	0	0	EBNA2_gain_loop	chr11	65253881	65257185	loop_2000
chr11	65254201	65254201	rs682845	Plateletcrit_EUR	0	0	0	0	0	EBNA2_gain_loop	chr11	65253881	65257185	loop_2000
chr11	65256164	65256164	rs11227205	Glaucoma__primary_open_angle_AFR,Glaucoma__primary_open_angle_AMR,Glaucoma__primary_open_angle_EAS,Glaucoma__primary_open_angle_EUR	0	0	0	0	0	EBNA2_gain_loop	chr11	65253881	65257185	loop_2000
chr11	65257079	65257079	rs12286951	Educational_attainment__MTAG_EUR,Educational_attainment__years_of_education_EUR,Height_EUR	0	0	0	0	0	EBNA2_gain_loop	chr11	65253881	65257185	loop_2000
chr11	65354150	65354150	rs11227229	Red_cell_distribution_width_EUR	0	0	0	0	0	EBNA2_gain_loop	chr11	65353654	65357699	loop_2001
chr11	65354439	65354439	rs11606601	Red_cell_distribution_width_EUR	0	0	0	0	0	EBNA2_gain_loop	chr11	65353654	65357699	loop_2001
chr11	65356674	65356674	rs11227230	Type_2_diabetes_EUR	0	0	1	0	0	EBNA2_gain_loop	chr11	65353654	65357699	loop_2001
chr11	65356754	65356754	rs948578	Red_cell_distribution_width_EUR	0	0	0	0	0	EBNA2_gain_loop	chr11	65353654	65357699	loop_2001
chr11	65357697	65357697	rs1151503	Type_2_diabetes_EUR	0	0	1	0	0	EBNA2_gain_loop	chr11	65353654	65357699	loop_2001
chr11	65405510	65405510	rs2306362	Triglycerides_AFR,Triglycerides_AMR,Creatinine_levels_EAS,Serum_uric_acid_levels_EAS,Glomerular_filtration_rate__creatinine_EUR,Triglycerides_EUR	0	0	0	0	0	EBNA2_gain_loop	chr11	65405021	65409555	loop_2001
chr11	65405600	65405600	rs2306363	Diastolic_blood_pressure_AFR,Diastolic_blood_pressure_x_alcohol_consumption__light_vs_heavy__interaction__2df_test_AFR,Diastolic_blood_pressure_x_alcohol_consumption_interaction__2df_test_AFR,Mean_arterial_pressure_x_alcohol_consumption__light_vs_heavy__interaction__2df_test_AFR,Mean_arterial_pressure_x_alcohol_consumption_interaction__2df_test_AFR,Pulse_pressure_AFR,Systolic_blood_pressure_AFR,S…	0	0	0	0	0	EBNA2_gain_loop	chr11	65405021	65409555	loop_2001
chr11	65405699	65405699	rs4930156	Platelet_count_EUR	0	0	0	0	0	EBNA2_gain_loop	chr11	65405021	65409555	loop_2001
chr11	65405853	65405853	rs34679731	Diastolic_blood_pressure__cigarette_smoking_interaction_AFR,Systolic_blood_pressure__cigarette_smoking_interaction_AFR	0	0	0	0	0	EBNA2_gain_loop	chr11	65405021	65409555	loop_2001
chr11	65406179	65406179	rs7944860	Platelet_count_EUR	0	0	0	0	0	EBNA2_gain_loop	chr11	65405021	65409555	loop_2001
chr11	65406393	65406393	rs2509948	Platelet_count_EUR	0	0	0	0	0	EBNA2_gain_loop	chr11	65405021	65409555	loop_2001
chr11	65406869	65406869	rs3782086	Diastolic_blood_pressure__cigarette_smoking_interaction_AMR,Systolic_blood_pressure__cigarette_smoking_interaction_AMR,Diastolic_blood_pressure__cigarette_smoking_interaction_EAS,Systolic_blood_pressure__cigarette_smoking_interaction_EAS,Diastolic_blood_pressure__cigarette_smoking_interaction_EUR,Systolic_blood_pressure__cigarette_smoking_interaction_EUR	0	0	0	0	0	EBNA2_gain_loop	chr11	65405021	65409555	loop_2001
chr11	65408937	65408937	rs3741378	Diastolic_blood_pressure__cigarette_smoking_interaction_AFR,Systolic_blood_pressure__cigarette_smoking_interaction_AFR,Diastolic_blood_pressure__cigarette_smoking_interaction_AMR,Systolic_blood_pressure__cigarette_smoking_interaction_AMR,Diastolic_blood_pressure__cigarette_smoking_interaction_EAS,Systolic_blood_pressure__cigarette_smoking_interaction_EAS,Diastolic_blood_pressure__cigarette_smokin…	0	0	0	0	0	EBNA2_gain_loop	chr11	65405021	65409555	loop_2001
chr11	65431360	65431360	rs7101916	Diastolic_blood_pressure__cigarette_smoking_interaction_EAS,HDL_cholesterol_levels_EAS,Mean_arterial_pressure_EAS,Systolic_blood_pressure__cigarette_smoking_interaction_EAS,Diastolic_blood_pressure__cigarette_smoking_interaction_EUR,Systolic_blood_pressure__cigarette_smoking_interaction_EUR	0	0	0	0	0	EBNA2_gain_loop	chr11	65428735	65431695	loop_2003
chr11	65724437	65724437	rs72926898	Blood_protein_levels_EUR	0	0	0	0	0	EBNA2_gain_loop	chr11	65723671	65725527	loop_2006
chr11	65725042	65725042	rs59768626	Blood_protein_levels_EUR	0	0	0	0	0	EBNA2_gain_loop	chr11	65723671	65725527	loop_2006
chr11	65728676	65728676	rs5792377	Heel_bone_mineral_density_EUR	0	0	0	0	0	EBNA2_gain_loop	chr11	65728658	65730750	loop_2006
chr11	65729677	65729677	rs58905199	Blood_protein_levels_EUR	0	0	0	0	0	EBNA2_gain_loop	chr11	65728658	65730750	loop_2006
chr11	65729680	65729680	rs57968007	Blood_protein_levels_EUR	0	0	0	0	0	EBNA2_gain_loop	chr11	65728658	65730750	loop_2006
chr11	65895166	65895166	rs564343	Obesity__early_onset_extreme_EUR	0	0	0	0	0	EBNA2_gain_loop	chr11	65892946	65896130	loop_2009
chr11	67202044	67202044	rs1790752	Mean_corpuscular_volume_EUR	0	0	0	0	0	EBNA2_gain_loop	chr11	67201994	67206267	loop_2028
chr11	67202156	67202156	rs13859	Mean_corpuscular_volume_EUR	0	0	0	0	0	EBNA2_gain_loop	chr11	67201994	67206267	loop_2028
chr11	67202826	67202826	rs10274	Mean_corpuscular_volume_EUR	0	0	0	0	0	EBNA2_gain_loop	chr11	67201994	67206267	loop_2028
chr11	67204342	67204342	rs12787021	Mean_corpuscular_volume_EUR	0	0	0	0	0	EBNA2_gain_loop	chr11	67201994	67206267	loop_2028
chr11	67205462	67205462	rs869736	Mean_corpuscular_volume_EUR	0	0	0	0	0	EBNA2_gain_loop	chr11	67201994	67206267	loop_2028
chr11	67205978	67205978	rs872375	Mean_corpuscular_volume_EUR	0	0	0	0	0	EBNA2_gain_loop	chr11	67201994	67206267	loop_2028
chr11	67211569	67211569	rs1808279	Mean_corpuscular_volume_EUR	0	0	0	0	0	EBNA2_gain_loop	chr11	67209321	67214106	loop_2030
chr11	67213284	67213284	rs1638555	Mean_corpuscular_volume_EUR	0	0	0	0	0	EBNA2_gain_loop	chr11	67209321	67214106	loop_2030
chr11	67213518	67213518	rs1638556	Mean_corpuscular_volume_EUR	0	0	0	0	0	EBNA2_gain_loop	chr11	67209321	67214106	loop_2030
chr11	67213748	67213748	rs7479801	Mean_corpuscular_volume_EUR	0	0	0	0	0	EBNA2_gain_loop	chr11	67209321	67214106	loop_2030
chr11	67213956	67213956	rs2109123	Mean_corpuscular_volume_EUR	0	0	0	0	0	EBNA2_gain_loop	chr11	67209321	67214106	loop_2030
chr11	67251107	67251107	rs35392564	Mean_corpuscular_volume_EUR	0	0	0	0	0	EBNA2_gain_loop	chr11	67249917	67253572	loop_2027
chr11	67252989	67252989	rs595130	Mean_corpuscular_volume_EUR	0	0	0	0	0	EBNA2_gain_loop	chr11	67249917	67253572	loop_2027
chr11	67253564	67253564	rs7110021	Mean_corpuscular_volume_EUR	0	0	0	0	0	EBNA2_gain_loop	chr11	67249917	67253572	loop_2027
chr11	67382429	67382429	rs35156880	Height_EUR	0	0	0	0	0	EBNA2_gain_loop	chr11	67380051	67384410	loop_2032
chr11	67417662	67417662	rs78967811	Serum_metabolite_levels_EUR	0	0	0	0	0	EBNA2_down_genes	chr11	67417629	67418629	ACY3
chr11	68268050	68268050	rs10791981	Bone_mineral_density__paediatric__skull_AMR,Bone_mineral_density__paediatric__skull_EUR,Bone_mineral_density__paediatric__total_body_less_head_EUR,Educational_attainment__MTAG_EUR,Educational_attainment__years_of_education_EUR,Heel_bone_mineral_density_EUR,Highest_math_class_taken_EUR,Highest_math_class_taken__MTAG_EUR,Self_reported_math_ability_EUR,Self_reported_math_ability__MTAG_EUR,TB_LM_or_T…	0	0	0	0	0	EBNA2_gain_loop	chr11	68265404	68270021	loop_2035
chr11	68269014	68269014	rs10896331	Bone_mineral_density__paediatric__skull_AMR,Bone_mineral_density__paediatric__skull_EUR,Bone_mineral_density__paediatric__total_body_less_head_EUR,Educational_attainment__MTAG_EUR,Educational_attainment__years_of_education_EUR,Heel_bone_mineral_density_EUR,Highest_math_class_taken_EUR,Highest_math_class_taken__MTAG_EUR,Self_reported_math_ability_EUR,Self_reported_math_ability__MTAG_EUR,TB_LM_or_T…	0	0	0	0	0	EBNA2_gain_loop	chr11	68265404	68270021	loop_2035
chr11	68278829	68278829	rs55883802	Bone_mineral_density__paediatric__skull_AMR,Bone_mineral_density__paediatric__skull_EUR,Bone_mineral_density__paediatric__total_body_less_head_EUR,Educational_attainment__MTAG_EUR,Educational_attainment__years_of_education_EUR,Heel_bone_mineral_density_EUR,Highest_math_class_taken_EUR,Highest_math_class_taken__MTAG_EUR,Self_reported_math_ability_EUR,Self_reported_math_ability__MTAG_EUR,TB_LM_or_T…	0	0	0	0	0	EBNA2_gain_loop	chr11	68278770	68280414	loop_2035
chr11	71812313	71812313	rs143211479	Severe_influenza_A__H1N1__infection_EUR	0	0	0	0	0	EBNA2_gain_loop	chr11	71812200	71815118	loop_2037
chr11	71812411	71812411	rs659513	Severe_influenza_A__H1N1__infection_EUR	0	0	0	0	0	EBNA2_gain_loop	chr11	71812200	71815118	loop_2037
chr11	71813747	71813747	rs4943821	Severe_influenza_A__H1N1__infection_EUR	0	0	0	0	0	EBNA2_gain_loop	chr11	71812200	71815118	loop_2037
chr11	71822165	71822165	rs144948522	Severe_influenza_A__H1N1__infection_EUR	0	0	0	0	0	EBNA2_gain_loop	chr11	71821915	71825778	loop_2037
chr11	71822401	71822401	rs3750908	Severe_influenza_A__H1N1__infection_EUR	0	0	0	0	0	EBNA2_gain_loop	chr11	71821915	71825778	loop_2037
chr11	71823133	71823133	rs3793938	Severe_influenza_A__H1N1__infection_EUR	0	0	0	0	0	EBNA2_gain_loop	chr11	71821915	71825778	loop_2037
chr11	71824999	71824999	rs139133892	Severe_influenza_A__H1N1__infection_EUR	0	0	0	0	0	EBNA2_gain_loop	chr11	71821915	71825778	loop_2037
chr11	71825006	71825006	rs116781589	Severe_influenza_A__H1N1__infection_EUR	0	0	0	0	0	EBNA2_gain_loop	chr11	71821915	71825778	loop_2037
chr11	72504972	72504972	rs1059000	Glycated_hemoglobin_levels_EAS,Type_2_diabetes_EAS	0	0	1	0	0	EBNA2_gain_loop	chr11	72503418	72506184	loop_2039
chr11	72505485	72505485	rs370941247	Mean_platelet_volume_EUR	0	0	0	0	0	EBNA2_gain_loop	chr11	72503418	72506184	loop_2039
chr11	73695655	73695655	chr11_73695655	Colorectal_cancer_or_advanced_adenoma_EAS	0	0	0	0	0	EBNA2_gain_loop	chr11	73692321	73696854	loop_2043
chr11	75513866	75513866	rs58340821	HDL_cholesterol_EUR	0	0	0	0	0	EBNA2_loss_loop	chr11	75512517	75515835	loop_30
chr11	75513888	75513888	rs60677263	HDL_cholesterol_EUR	0	0	0	0	0	EBNA2_loss_loop	chr11	75512517	75515835	loop_30
chr11	75514380	75514380	rs11236533	HDL_cholesterol_EUR	0	0	0	0	0	EBNA2_loss_loop	chr11	75512517	75515835	loop_30
chr11	75514528	75514528	rs11236534	HDL_cholesterol_EUR	0	0	0	0	0	EBNA2_loss_loop	chr11	75512517	75515835	loop_30
chr11	75515399	75515399	rs10899124	HDL_cholesterol_EUR	0	0	0	0	0	EBNA2_loss_loop	chr11	75512517	75515835	loop_30
chr11	93394383	93394383	rs7121150	Waist_circumference_adjusted_for_body_mass_index_EUR	0	0	0	0	0	EBNA2_gain_loop	chr11	93393849	93396754	loop_2051
chr11	93395522	93395522	rs7949850	Waist_circumference_adjusted_for_body_mass_index_EUR	0	0	0	0	0	EBNA2_gain_loop	chr11	93393849	93396754	loop_2051
chr11	108107009	108107009	rs228597	Mean_corpuscular_hemoglobin_EAS,Mean_corpuscular_volume_EAS,Red_blood_cell_count_EAS,Eosinophil_counts_EUR,Eosinophil_percentage_of_white_cells_EUR,Sum_eosinophil_basophil_counts_EUR	0	0	1	0	0	EBNA2_open_Chromatin	chr11	108106936	108107679	500
chr11	108107497	108107497	rs228598	Mean_corpuscular_hemoglobin_EAS,Mean_corpuscular_volume_EAS,Red_blood_cell_count_EAS,Eosinophil_counts_EUR,Eosinophil_percentage_of_white_cells_EUR,Sum_eosinophil_basophil_counts_EUR	0	0	1	0	0	EBNA2_open_Chromatin	chr11	108106936	108107679	500
chr11	108107577	108107577	rs7113958	Pulse_pressure_x_alcohol_consumption_interaction__2df_test_AMR	0	0	0	0	0	EBNA2_open_Chromatin	chr11	108106936	108107679	500
chr11	108107660	108107660	rs228599	Mean_corpuscular_hemoglobin_EAS,Mean_corpuscular_volume_EAS,Red_blood_cell_count_EAS,Eosinophil_counts_EUR,Eosinophil_percentage_of_white_cells_EUR,Sum_eosinophil_basophil_counts_EUR	0	0	1	0	0	EBNA2_open_Chromatin	chr11	108106936	108107679	500
chr11	111160753	111160753	rs4477469	Colorectal_cancer_or_advanced_adenoma_EAS,Colorectal_cancer_EUR,Colorectal_cancer_or_advanced_adenoma_EUR	0	0	0	0	0	EBNA2_gain_loop	chr11	111160548	111163092	loop_2063
chr11	111160793	111160793	rs71057059	Colorectal_cancer_or_advanced_adenoma_EAS	0	0	0	0	0	EBNA2_gain_loop	chr11	111160548	111163092	loop_2063
chr11	111162691	111162691	rs10789822	Colorectal_cancer_or_advanced_adenoma_EAS,Colorectal_cancer_EUR,Colorectal_cancer_or_advanced_adenoma_EUR	0	0	0	0	0	EBNA2_gain_loop	chr11	111160548	111163092	loop_2063
chr11	111944901	111944901	rs2303437	General_risk_tolerance__MTAG_EUR	0	0	0	0	0	EBNA2_gain_loop	chr11	111944060	111946191	loop_2069
chr11	114030799	114030799	rs648044	Educational_attainment__MTAG_EUR,Educational_attainment__years_of_education_EUR,Non_glioblastoma_glioma_EUR	0	0	0	0	0	EBNA2_gain_loop	chr11	114029512	114031476	loop_2071
chr11	114040394	114040394	rs77669868	Monocyte_percentage_of_white_cells_EUR	0	0	1	0	0	EBNA2_gain_loop	chr11	114038336	114041679	loop_2071
chr11	118084980	118084980	rs11216819	Blood_protein_levels_EUR,Lung_adenocarcinoma_EUR,Lung_cancer_EUR	0	0	0	0	0	EBNA2_gain_loop	chr11	118084607	118086878	loop_2075
chr11	118085273	118085273	rs187005373	Triglyceride_levels_EUR	0	0	0	0	0	EBNA2_gain_loop	chr11	118084607	118086878	loop_2075
chr11	118094513	118094513	rs2051480	Blood_protein_levels_EUR,Lung_adenocarcinoma_EUR,Lung_cancer_EUR	0	0	0	0	0	EBNA2_gain_loop	chr11	118094149	118099619	loop_2075
chr11	118095148	118095148	rs57495164	Blood_protein_levels_EUR,Lung_adenocarcinoma_EUR,Lung_cancer_EUR	0	0	0	0	0	EBNA2_gain_loop	chr11	118094149	118099619	loop_2075
chr11	118096618	118096618	rs10892226	Blood_protein_levels_EUR,Lung_adenocarcinoma_EUR,Lung_cancer_EUR	0	0	0	0	0	EBNA2_gain_loop	chr11	118094149	118099619	loop_2075
chr11	118099617	118099617	rs11216825	Blood_protein_levels_EUR,Lung_adenocarcinoma_EUR,Lung_cancer_EUR	0	0	0	0	0	EBNA2_gain_loop	chr11	118094149	118099619	loop_2075
chr11	118690038	118690038	rs114433366	Vitiligo_EAS	1	0	1	0	0	EBNA2_loss_loop	chr11	118689691	118692865	loop_33
chr11	118690170	118690170	rs140022382	Vitiligo_EAS	1	0	1	0	0	EBNA2_loss_loop	chr11	118689691	118692865	loop_33
chr11	118690688	118690688	rs76649321	Vitiligo_EAS	1	0	1	0	0	EBNA2_loss_loop	chr11	118689691	118692865	loop_33
chr11	118691252	118691252	rs114073515	Vitiligo_EAS	1	0	1	0	0	EBNA2_loss_loop	chr11	118689691	118692865	loop_33
chr11	118691361	118691361	rs77281655	Vitiligo_EAS	1	0	1	0	0	EBNA2_loss_loop	chr11	118689691	118692865	loop_33
chr11	118691648	118691648	rs76593241	Vitiligo_EAS	1	0	1	0	0	EBNA2_loss_loop	chr11	118689691	118692865	loop_33
chr11	118691921	118691921	rs80126568	Vitiligo_EAS	1	0	1	0	0	EBNA2_loss_loop	chr11	118689691	118692865	loop_33
chr11	118692052	118692052	rs143389852	Vitiligo_EAS	1	0	1	0	0	EBNA2_loss_loop	chr11	118689691	118692865	loop_33
chr11	118692582	118692582	rs79514870	Vitiligo_EAS	1	0	1	0	0	EBNA2_loss_loop	chr11	118689691	118692865	loop_33
chr11	118722149	118722149	rs11217058	Rheumatoid_arthritis_EAS,Rheumatoid_arthritis__ACPA_positive_EAS,Allergy_EUR,Follicular_lymphoma_EUR,Primary_biliary_cholangitis_EUR,Rheumatoid_arthritis_EUR,Rheumatoid_arthritis__ACPA_positive_EUR	1	1	1	1	1	EBNA2_loss_loop	chr11	118721739	118723918	loop_34
chr11	118722457	118722457	rs80253223	Primary_biliary_cholangitis_EAS	1	0	1	0	0	EBNA2_loss_loop	chr11	118721739	118723918	loop_34
chr11	118723273	118723273	rs74475349	Primary_biliary_cholangitis_EAS	1	0	1	0	0	EBNA2_loss_loop	chr11	118721739	118723918	loop_34
chr11	118723748	118723748	rs11217060	Rheumatoid_arthritis_EAS,Rheumatoid_arthritis__ACPA_positive_EAS,Allergy_EUR,Follicular_lymphoma_EUR,Primary_biliary_cholangitis_EUR,Rheumatoid_arthritis_EUR,Rheumatoid_arthritis__ACPA_positive_EUR	1	1	1	1	1	EBNA2_loss_loop	chr11	118721739	118723918	loop_34
chr11	118740864	118740864	rs4936443	Rheumatoid_arthritis_EAS,Follicular_lymphoma_EUR,Primary_biliary_cholangitis_EUR,Rheumatoid_arthritis_EUR	1	1	1	0	1	EBNA2_closed_chromatin	chr11	118740837	118741790	570
chr11	118740864	118740864	rs4936443	Rheumatoid_arthritis_EAS,Follicular_lymphoma_EUR,Primary_biliary_cholangitis_EUR,Rheumatoid_arthritis_EUR	1	1	1	0	1	EBNA2_closed_chromatin	chr11	118740822	118741794	570
chr11	118740931	118740931	rs4938572	Follicular_lymphoma_EUR,Primary_biliary_cholangitis_EUR,Rheumatoid_arthritis_EUR	1	1	1	0	1	EBNA2_closed_chromatin	chr11	118740837	118741790	570
chr11	118740931	118740931	rs4938572	Follicular_lymphoma_EUR,Primary_biliary_cholangitis_EUR,Rheumatoid_arthritis_EUR	1	1	1	0	1	EBNA2_closed_chromatin	chr11	118740822	118741794	570
chr11	118741157	118741157	rs7117261	Rheumatoid_arthritis_EAS,Follicular_lymphoma_EUR,Primary_biliary_cholangitis_EUR,Rheumatoid_arthritis_EUR	1	1	1	0	1	EBNA2_closed_chromatin	chr11	118740837	118741790	570
chr11	118741157	118741157	rs7117261	Rheumatoid_arthritis_EAS,Follicular_lymphoma_EUR,Primary_biliary_cholangitis_EUR,Rheumatoid_arthritis_EUR	1	1	1	0	1	EBNA2_closed_chromatin	chr11	118740822	118741794	570
chr11	118753597	118753597	rs75646772	Albumin_globulin_ratio_EAS	0	0	0	0	0	EBNA2_loss_loop	chr11	118753458	118754810	loop_34
chr11	118753641	118753641	rs78312342	Albumin_globulin_ratio_EAS	0	0	0	0	0	EBNA2_loss_loop	chr11	118753458	118754810	loop_34
chr11	118753770	118753770	rs79422790	Albumin_globulin_ratio_EAS	0	0	0	0	0	EBNA2_loss_loop	chr11	118753458	118754810	loop_34
chr11	118753918	118753918	rs78316948	Albumin_globulin_ratio_EAS	0	0	0	0	0	EBNA2_loss_loop	chr11	118753458	118754810	loop_34
chr11	118754314	118754314	rs11574667	Albumin_globulin_ratio_EAS	0	0	0	0	0	EBNA2_loss_loop	chr11	118753458	118754810	loop_34
chr11	118754314	118754314	rs11574667	Albumin_globulin_ratio_EAS	0	0	0	0	0	EBNA2_down_genes	chr11	118753974	118754974	CXCR5
chr11	118754353	118754353	rs630923	Inflammatory_bowel_disease_EUR	0	0	1	0	1	EBNA2_loss_loop	chr11	118753458	118754810	loop_34
chr11	118754353	118754353	rs630923	Inflammatory_bowel_disease_EUR	0	0	1	0	1	EBNA2_down_genes	chr11	118753974	118754974	CXCR5
chr11	118754518	118754518	rs2276344	Albumin_globulin_ratio_EAS	0	0	0	0	0	EBNA2_loss_loop	chr11	118753458	118754810	loop_34
chr11	118754518	118754518	rs2276344	Albumin_globulin_ratio_EAS	0	0	0	0	0	EBNA2_down_genes	chr11	118753974	118754974	CXCR5
chr11	118964330	118964330	rs640603	Educational_attainment__MTAG_EUR	0	0	0	0	0	EBNA2_gain_loop	chr11	118963179	118967553	loop_2078
chr11	118965048	118965048	rs7350	Educational_attainment__MTAG_EUR	0	0	0	0	0	EBNA2_gain_loop	chr11	118963179	118967553	loop_2078
chr11	118965338	118965338	rs1064193	Educational_attainment__MTAG_EUR	0	0	0	0	0	EBNA2_gain_loop	chr11	118963179	118967553	loop_2078
chr11	118965479	118965479	rs1134734	Educational_attainment__MTAG_EUR	0	0	0	0	0	EBNA2_gain_loop	chr11	118963179	118967553	loop_2078
chr11	118966780	118966780	rs2509851	Educational_attainment__MTAG_EUR	0	0	0	0	0	EBNA2_gain_loop	chr11	118963179	118967553	loop_2078
chr11	118967291	118967291	rs7759	Educational_attainment__MTAG_EUR	0	0	0	0	0	EBNA2_gain_loop	chr11	118963179	118967553	loop_2078
chr11	126058369	126058369	rs487450	Eosinophil_percentage_of_granulocytes_EUR,Neutrophil_percentage_of_granulocytes_EUR	0	0	1	0	0	EBNA2_loss_loop	chr11	126056591	126061169	loop_37
chr11	126059949	126059949	rs522486	Eosinophil_percentage_of_granulocytes_EUR,Neutrophil_percentage_of_granulocytes_EUR	0	0	1	0	0	EBNA2_loss_loop	chr11	126056591	126061169	loop_37
chr11	128389391	128389391	rs11819995	Type_2_diabetes_EAS,Type_2_diabetes_EUR	0	0	1	0	0	EBNA2_gain_loop	chr11	128389295	128394445	loop_2090
chr11	128389760	128389760	rs143880791	Celiac_disease_EUR,Chronic_inflammatory_diseases__ankylosing_spondylitis__Crohn_s_disease__psoriasis__primary_sclerosing_cholangitis__ulcerative_colitis___pleiotropy_EUR,Inflammatory_bowel_disease_EUR	1	1	1	0	1	EBNA2_gain_loop	chr11	128389295	128394445	loop_2090
chr11	128390069	128390069	rs7120822	Celiac_disease_EUR,Chronic_inflammatory_diseases__ankylosing_spondylitis__Crohn_s_disease__psoriasis__primary_sclerosing_cholangitis__ulcerative_colitis___pleiotropy_EUR,Inflammatory_bowel_disease_EUR	1	1	1	0	1	EBNA2_gain_loop	chr11	128389295	128394445	loop_2090
chr11	128391937	128391937	rs61907765	Celiac_disease_EUR,Chronic_inflammatory_diseases__ankylosing_spondylitis__Crohn_s_disease__psoriasis__primary_sclerosing_cholangitis__ulcerative_colitis___pleiotropy_EUR,Inflammatory_bowel_disease_EUR	1	1	1	0	1	EBNA2_gain_loop	chr11	128389295	128394445	loop_2090
chr11	128392903	128392903	rs151213883	Celiac_disease_EUR,Chronic_inflammatory_diseases__ankylosing_spondylitis__Crohn_s_disease__psoriasis__primary_sclerosing_cholangitis__ulcerative_colitis___pleiotropy_EUR,Inflammatory_bowel_disease_EUR	1	1	1	0	1	EBNA2_gain_loop	chr11	128389295	128394445	loop_2090
chr11	128420873	128420873	rs4245078	Psoriasis_EAS	1	1	1	0	0	EBNA2_gain_loop	chr11	128418394	128424779	loop_2090
chr11	128420926	128420926	rs4245079	Psoriasis_EAS	1	1	1	0	0	EBNA2_gain_loop	chr11	128418394	128424779	loop_2090
chr11	128564794	128564794	rs7930515	White_blood_cell_count__basophil_EAS	0	0	1	0	0	EBNA2_gain_loop	chr11	128563094	128568224	loop_2092
chr11	128564996	128564996	rs7945814	White_blood_cell_count__basophil_EAS	0	0	1	0	0	EBNA2_gain_loop	chr11	128563094	128568224	loop_2092
chr11	128565034	128565034	rs10893909	Platelet_count_EUR,Plateletcrit_EUR	0	0	0	0	0	EBNA2_gain_loop	chr11	128563094	128568224	loop_2092
chr11	128567876	128567876	rs11221439	Platelet_count_EUR,Plateletcrit_EUR	0	0	0	0	0	EBNA2_gain_loop	chr11	128563094	128568224	loop_2092
chr11	128567929	128567929	rs58332977	White_blood_cell_count__basophil_EAS	0	0	1	0	0	EBNA2_gain_loop	chr11	128563094	128568224	loop_2092
chr11	128628756	128628756	rs531894	Vitiligo_EUR	1	0	1	0	0	EBNA2_gain_loop	chr11	128627163	128629917	loop_2092
chr11	128628875	128628875	rs584577	Vitiligo_EUR	1	0	1	0	0	EBNA2_gain_loop	chr11	128627163	128629917	loop_2092
chr11	128628935	128628935	rs631647	Vitiligo_EUR	1	0	1	0	0	EBNA2_gain_loop	chr11	128627163	128629917	loop_2092
chr11	128629382	128629382	rs672149	Vitiligo_EUR	1	0	1	0	0	EBNA2_gain_loop	chr11	128627163	128629917	loop_2092
chr12	751010	751010	chr12_751010	Granulocyte_percentage_of_myeloid_white_cells_EUR,Monocyte_percentage_of_white_cells_EUR	0	0	1	0	0	EBNA2_gain_loop	chr12	750786	753427	loop_2100
chr12	751514	751514	rs61916675	Granulocyte_percentage_of_myeloid_white_cells_EUR,Monocyte_percentage_of_white_cells_EUR	0	0	1	0	0	EBNA2_gain_loop	chr12	750786	753427	loop_2100
chr12	751609	751609	rs2369391	Monocyte_count_EUR	0	0	1	0	0	EBNA2_gain_loop	chr12	750786	753427	loop_2100
chr12	751619	751619	rs7487827	Monocyte_count_EUR	0	0	1	0	0	EBNA2_gain_loop	chr12	750786	753427	loop_2100
chr12	781722	781722	rs34483092	Stroke_EUR	0	0	0	0	0	EBNA2_gain_loop	chr12	781019	784487	loop_2105
chr12	783484	783484	rs12425791	Stroke_EUR	0	0	0	0	0	EBNA2_gain_loop	chr12	781019	784487	loop_2105
chr12	2365287	2365287	rs114310140	Educational_attainment__MTAG_EUR,Highest_math_class_taken__MTAG_EUR	0	0	0	0	0	EBNA2_closed_chromatin	chr12	2364924	2365291	170
chr12	2365287	2365287	rs114310140	Educational_attainment__MTAG_EUR,Highest_math_class_taken__MTAG_EUR	0	0	0	0	0	EBNA2_closed_chromatin	chr12	2364923	2365291	170
chr12	2365290	2365290	rs191226186	Educational_attainment__MTAG_EUR,Highest_math_class_taken__MTAG_EUR	0	0	0	0	0	EBNA2_closed_chromatin	chr12	2364924	2365291	170
chr12	2365290	2365290	rs191226186	Educational_attainment__MTAG_EUR,Highest_math_class_taken__MTAG_EUR	0	0	0	0	0	EBNA2_closed_chromatin	chr12	2364923	2365291	170
chr12	2394025	2394025	rs115500284	Educational_attainment__MTAG_EUR,Highest_math_class_taken__MTAG_EUR	0	0	0	0	0	EBNA2_gain_loop	chr12	2392339	2395768	loop_2112
chr12	2394434	2394434	rs76408048	Educational_attainment__MTAG_EUR,Highest_math_class_taken__MTAG_EUR	0	0	0	0	0	EBNA2_gain_loop	chr12	2392339	2395768	loop_2112
chr12	2394494	2394494	rs78525694	Educational_attainment__MTAG_EUR,Highest_math_class_taken__MTAG_EUR	0	0	0	0	0	EBNA2_gain_loop	chr12	2392339	2395768	loop_2112
chr12	2394704	2394704	rs78161460	Educational_attainment__MTAG_EUR,Highest_math_class_taken__MTAG_EUR	0	0	0	0	0	EBNA2_gain_loop	chr12	2392339	2395768	loop_2112
chr12	2394781	2394781	rs12311439	Autism_spectrum_disorder__attention_deficit_hyperactivity_disorder__bipolar_disorder__major_depressive_disorder__and_schizophrenia__combined_EUR,Schizophrenia_or_bipolar_disorder_EUR	0	0	0	0	0	EBNA2_gain_loop	chr12	2392339	2395768	loop_2112
chr12	2394935	2394935	rs78683530	Educational_attainment__MTAG_EUR,Highest_math_class_taken__MTAG_EUR	0	0	0	0	0	EBNA2_gain_loop	chr12	2392339	2395768	loop_2112
chr12	6445329	6445329	rs2284344	Lymphocyte_counts_EUR,Monocyte_count_EUR,Platelet_count_EUR,Plateletcrit_EUR	0	0	1	0	0	EBNA2_gain_loop	chr12	6444179	6447513	loop_2116
chr12	6445982	6445982	rs887477	Lymphocyte_counts_EUR,Monocyte_count_EUR,Platelet_count_EUR,Plateletcrit_EUR	0	0	1	0	0	EBNA2_gain_loop	chr12	6444179	6447513	loop_2116
chr12	6446777	6446777	rs1860545	Ankylosing_spondylitis_EAS,Primary_biliary_cholangitis_EAS,Ankylosing_spondylitis_EUR,Chronic_inflammatory_diseases__ankylosing_spondylitis__Crohn_s_disease__psoriasis__primary_sclerosing_cholangitis__ulcerative_colitis___pleiotropy_EUR,Multiple_sclerosis_EUR,Primary_biliary_cholangitis_EUR,Primary_biliary_cirrhosis_EUR	1	1	1	0	1	EBNA2_gain_loop	chr12	6444179	6447513	loop_2116
chr12	6446985	6446985	rs4149581	Ankylosing_spondylitis_EAS,Primary_biliary_cholangitis_EAS,Ankylosing_spondylitis_EUR,Chronic_inflammatory_diseases__ankylosing_spondylitis__Crohn_s_disease__psoriasis__primary_sclerosing_cholangitis__ulcerative_colitis___pleiotropy_EUR,Multiple_sclerosis_EUR,Primary_biliary_cholangitis_EUR,Primary_biliary_cirrhosis_EUR	1	1	1	0	1	EBNA2_gain_loop	chr12	6444179	6447513	loop_2116
chr12	6446990	6446990	rs4149580	Ankylosing_spondylitis_EAS,Primary_biliary_cholangitis_EAS,Ankylosing_spondylitis_EUR,Chronic_inflammatory_diseases__ankylosing_spondylitis__Crohn_s_disease__psoriasis__primary_sclerosing_cholangitis__ulcerative_colitis___pleiotropy_EUR,Multiple_sclerosis_EUR,Primary_biliary_cholangitis_EUR,Primary_biliary_cirrhosis_EUR	1	1	1	0	1	EBNA2_gain_loop	chr12	6444179	6447513	loop_2116
chr12	6601743	6601743	rs1001127	Blood_protein_levels_EUR	0	0	0	0	0	EBNA2_gain_loop	chr12	6601601	6605463	loop_2122
chr12	6714668	6714668	rs1639123	Heel_bone_mineral_density_EUR	0	0	0	0	0	EBNA2_gain_loop	chr12	6714388	6716194	loop_2123
chr12	6715593	6715593	rs1734116	Heel_bone_mineral_density_EUR	0	0	0	0	0	EBNA2_gain_loop	chr12	6714388	6716194	loop_2123
chr12	6862174	6862174	rs13402	Smoking_initiation__ever_regular_vs_never_regular___MTAG_EUR	0	0	0	0	0	EBNA2_gain_loop	chr12	6861463	6863566	loop_2130
chr12	6862646	6862646	rs3759344	Smoking_initiation__ever_regular_vs_never_regular___MTAG_EUR	0	0	0	0	0	EBNA2_gain_loop	chr12	6861463	6863566	loop_2130
chr12	6862678	6862678	rs3759345	Smoking_initiation__ever_regular_vs_never_regular___MTAG_EUR	0	0	0	0	0	EBNA2_gain_loop	chr12	6861463	6863566	loop_2130
chr12	6959095	6959095	rs367917525	Blood_protein_levels_EUR	0	0	0	0	0	EBNA2_gain_loop	chr12	6958733	6962506	loop_2127
chr12	6960893	6960893	rs2071058	Blood_protein_levels_EUR	0	0	0	0	0	EBNA2_gain_loop	chr12	6958733	6962506	loop_2127
chr12	6982347	6982347	rs6489739	Blood_protein_levels_EUR	0	0	0	0	0	EBNA2_gain_loop	chr12	6982310	6983692	loop_2131
chr12	6982405	6982405	rs11064439	Colorectal_cancer_EAS	0	0	0	0	0	EBNA2_gain_loop	chr12	6982310	6983692	loop_2131
chr12	6982452	6982452	rs3825335	Blood_protein_levels_EUR	0	0	0	0	0	EBNA2_gain_loop	chr12	6982310	6983692	loop_2131
chr12	6982759	6982759	rs3213432	Colorectal_cancer_EAS	0	0	0	0	0	EBNA2_gain_loop	chr12	6982310	6983692	loop_2131
chr12	7053026	7053026	rs74057226	Mean_corpuscular_hemoglobin_concentration_EAS	0	0	0	0	0	EBNA2_gain_loop	chr12	7051948	7056000	loop_2136
chr12	7053096	7053096	rs74057227	Mean_corpuscular_hemoglobin_concentration_EAS	0	0	0	0	0	EBNA2_gain_loop	chr12	7051948	7056000	loop_2136
chr12	7053098	7053098	rs74057228	Mean_corpuscular_hemoglobin_concentration_EAS	0	0	0	0	0	EBNA2_gain_loop	chr12	7051948	7056000	loop_2136
chr12	7054530	7054530	rs74057229	Mean_corpuscular_hemoglobin_concentration_EAS	0	0	0	0	0	EBNA2_gain_loop	chr12	7051948	7056000	loop_2136
chr12	7059619	7059619	rs45463899	Mean_corpuscular_hemoglobin_concentration_EAS	0	0	0	0	0	EBNA2_gain_loop	chr12	7059590	7064494	loop_2137
chr12	7059640	7059640	rs35314444	Mean_corpuscular_hemoglobin_concentration_EAS	0	0	0	0	0	EBNA2_gain_loop	chr12	7059590	7064494	loop_2137
chr12	7061825	7061825	rs115534901	Mean_corpuscular_hemoglobin_concentration_EAS	0	0	0	0	0	EBNA2_gain_loop	chr12	7059590	7064494	loop_2137
chr12	7061827	7061827	rs114389104	Mean_corpuscular_hemoglobin_concentration_EAS	0	0	0	0	0	EBNA2_gain_loop	chr12	7059590	7064494	loop_2137
chr12	7061828	7061828	rs114826802	Mean_corpuscular_hemoglobin_concentration_EAS	0	0	0	0	0	EBNA2_gain_loop	chr12	7059590	7064494	loop_2137
chr12	7062527	7062527	rs74448407	Mean_corpuscular_hemoglobin_concentration_EAS	0	0	0	0	0	EBNA2_gain_loop	chr12	7059590	7064494	loop_2137
chr12	7063240	7063240	rs141197896	Mean_corpuscular_hemoglobin_concentration_EAS	0	0	0	0	0	EBNA2_gain_loop	chr12	7059590	7064494	loop_2137
chr12	7067687	7067687	rs77231069	Mean_corpuscular_hemoglobin_concentration_EAS	0	0	0	0	0	EBNA2_gain_loop	chr12	7066654	7069653	loop_2137
chr12	15724154	15724154	rs11056563	Cognitive_function_EUR	0	0	0	0	0	EBNA2_open_Chromatin	chr12	15723778	15724565	404
chr12	15724215	15724215	rs11056564	Cognitive_function_EUR	0	0	0	0	0	EBNA2_open_Chromatin	chr12	15723778	15724565	404
chr12	15724246	15724246	rs150410505	Cognitive_function_EUR	0	0	0	0	0	EBNA2_open_Chromatin	chr12	15723778	15724565	404
chr12	15724365	15724365	rs10846213	Cognitive_function_EUR	0	0	0	0	0	EBNA2_open_Chromatin	chr12	15723778	15724565	404
chr12	27090550	27090550	rs2279351	Mean_corpuscular_volume_EUR	0	0	0	0	0	EBNA2_gain_loop	chr12	27089690	27093584	loop_2162
chr12	28014970	28014970	rs10492367	Osteoarthritis__hip_EUR,Osteoarthritis_of_the_hip_or_knee_EUR	1	0	1	0	0	EBNA2_open_Chromatin	chr12	28014706	28015196	347
chr12	28093828	28093828	rs143759819	Male_pattern_baldness_EUR	0	0	0	0	0	EBNA2_open_Chromatin	chr12	28093748	28094012	135
chr12	31743194	31743194	rs1259422	Highest_math_class_taken__MTAG_EUR	0	0	0	0	0	EBNA2_down_genes	chr12	31742356	31743356	DENND5B-AS1
chr12	31743344	31743344	rs1259423	Highest_math_class_taken__MTAG_EUR	0	0	0	0	0	EBNA2_down_genes	chr12	31742356	31743356	DENND5B-AS1
chr12	31756530	31756530	rs1542536	Educational_attainment__MTAG_EUR,Highest_math_class_taken__MTAG_EUR	0	0	0	0	0	EBNA2_loss_loop	chr12	31756204	31759292	loop_43
chr12	32676012	32676012	rs11052043	Mean_platelet_volume_EUR	0	0	0	0	0	EBNA2_loss_loop	chr12	32674260	32679039	loop_46
chr12	32701877	32701877	rs10844237	Hypertension_EAS	0	0	0	0	0	EBNA2_loss_loop	chr12	32701336	32704668	loop_46
chr12	46662485	46662485	rs2242355	Blond_vs__brown_black_hair_color_EUR,Fat_free_mass_EUR	0	0	0	0	0	EBNA2_gain_loop	chr12	46660386	46664984	loop_2176
chr12	48134214	48134214	rs10875687	Blood_protein_levels_EUR	0	0	0	0	0	EBNA2_gain_loop	chr12	48133009	48135882	loop_2179
chr12	48134360	48134360	rs10875688	Blood_protein_levels_EUR	0	0	0	0	0	EBNA2_gain_loop	chr12	48133009	48135882	loop_2179
chr12	48261192	48261192	rs67936699	Gut_microbiota__beta_diversity_EUR	0	0	0	0	0	EBNA2_gain_loop	chr12	48260914	48263095	loop_2184
chr12	48261192	48261192	rs67936699	Gut_microbiota__beta_diversity_EUR	0	0	0	0	0	EBNA2_loss_loop	chr12	48260914	48263095	loop_47
chr12	48262964	48262964	rs886441	Gut_microbiota__beta_diversity_EUR	0	0	0	0	0	EBNA2_gain_loop	chr12	48260914	48263095	loop_2184
chr12	48262964	48262964	rs886441	Gut_microbiota__beta_diversity_EUR	0	0	0	0	0	EBNA2_loss_loop	chr12	48260914	48263095	loop_47
chr12	48551721	48551721	rs117277325	Waist_to_hip_ratio_adjusted_for_BMI__additive_genetic_model_AMR	0	0	0	0	0	EBNA2_gain_loop	chr12	48550627	48552887	loop_2179
chr12	48591848	48591848	rs4760695	Macular_thickness_EUR	0	0	0	0	0	EBNA2_open_Chromatin	chr12	48591739	48592258	306
chr12	48591960	48591960	rs4760622	Macular_thickness_EUR	0	0	0	0	0	EBNA2_open_Chromatin	chr12	48591739	48592258	306
chr12	49319036	49319036	rs12829682	Heel_bone_mineral_density_EUR	0	0	0	0	0	EBNA2_gain_loop	chr12	49317470	49320245	loop_2187
chr12	49351390	49351390	rs833825	Heel_bone_mineral_density_EUR	0	0	0	0	0	EBNA2_gain_loop	chr12	49349962	49352487	loop_2187
chr12	49352319	49352319	rs833829	Heel_bone_mineral_density_EUR	0	0	0	0	0	EBNA2_gain_loop	chr12	49349962	49352487	loop_2187
chr12	49390677	49390677	rs10783299	Lumbar_spine_bone_mineral_density_EAS,Cognitive_performance_EUR,General_cognitive_ability_EUR,Highest_math_class_taken__MTAG_EUR,Self_reported_math_ability__MTAG_EUR	0	0	0	0	0	EBNA2_gain_loop	chr12	49390609	49392428	loop_2188
chr12	49392134	49392134	chr12_49392134	Total_body_bone_mineral_density_AFR	0	0	0	0	0	EBNA2_gain_loop	chr12	49390609	49392428	loop_2188
chr12	49455006	49455006	rs11168838	Lumbar_spine_bone_mineral_density_EAS	0	0	0	0	0	EBNA2_gain_loop	chr12	49452892	49455704	loop_2188
chr12	52443653	52443653	rs2269342	Mean_corpuscular_hemoglobin_EUR,Mean_corpuscular_volume_EUR	0	0	0	0	0	EBNA2_gain_loop	chr12	52443036	52445740	loop_2193
chr12	52472993	52472993	rs4761848	Mean_corpuscular_hemoglobin_EUR,Mean_corpuscular_volume_EUR	0	0	0	0	0	EBNA2_down_genes	chr12	52472979	52473979	OR7E47P
chr12	52475868	52475868	rs10876233	Mean_corpuscular_hemoglobin_EUR,Mean_corpuscular_volume_EUR	0	0	0	0	0	EBNA2_gain_loop	chr12	52473529	52477160	loop_2194
chr12	52482587	52482587	rs1317275	Mean_corpuscular_hemoglobin_EUR,Mean_corpuscular_volume_EUR	0	0	0	0	0	EBNA2_closed_chromatin	chr12	52482248	52482699	301
chr12	52482587	52482587	rs1317275	Mean_corpuscular_hemoglobin_EUR,Mean_corpuscular_volume_EUR	0	0	0	0	0	EBNA2_closed_chromatin	chr12	52482233	52482656	301
chr12	53593632	53593632	rs12232003	Highest_math_class_taken_EUR	0	0	0	0	0	EBNA2_gain_loop	chr12	53592952	53597148	loop_2195
chr12	54069803	54069803	rs916134	Height_EAS	0	0	0	0	0	EBNA2_gain_loop	chr12	54068278	54071300	loop_2202
chr12	54070445	54070445	rs3892761	Height_EAS	0	0	0	0	0	EBNA2_gain_loop	chr12	54068278	54071300	loop_2202
chr12	56500209	56500209	chr12_56500209	Pulse_pressure_AMR	0	0	0	0	0	EBNA2_gain_loop	chr12	56497776	56500955	loop_2208
chr12	56660905	56660905	rs60542959	Height_EAS,Psoriasis_EAS,Blood_protein_levels_EUR,General_risk_tolerance__MTAG_EUR,Height_EUR,Inflammatory_skin_disease_EUR,Psoriasis_EUR,Psoriasis_vulgaris_EUR	1	1	1	1	0	EBNA2_gain_loop	chr12	56659936	56661855	loop_2213
chr12	56693520	56693520	rs41423244	Height_EAS,Psoriasis_EAS,Blood_protein_levels_EUR,General_risk_tolerance__MTAG_EUR,Height_EUR,Inflammatory_skin_disease_EUR,Psoriasis_EUR,Psoriasis_vulgaris_EUR	1	1	1	1	0	EBNA2_gain_loop	chr12	56692133	56697209	loop_2214
chr12	56694261	56694261	rs2695789	Height_EAS,Psoriasis_EAS,Blood_protein_levels_EUR,General_risk_tolerance__MTAG_EUR,Height_EUR,Inflammatory_skin_disease_EUR,Psoriasis_EUR,Psoriasis_vulgaris_EUR	1	1	1	1	0	EBNA2_gain_loop	chr12	56692133	56697209	loop_2214
chr12	56694817	56694817	rs78149779	Height_EAS,Psoriasis_EAS,Blood_protein_levels_EUR,General_risk_tolerance__MTAG_EUR,Height_EUR,Inflammatory_skin_disease_EUR,Psoriasis_EUR,Psoriasis_vulgaris_EUR	1	1	1	1	0	EBNA2_gain_loop	chr12	56692133	56697209	loop_2214
chr12	56695460	56695460	rs61338787	Height_EAS,Psoriasis_EAS,Blood_protein_levels_EUR,General_risk_tolerance__MTAG_EUR,Height_EUR,Inflammatory_skin_disease_EUR,Psoriasis_EUR,Psoriasis_vulgaris_EUR	1	1	1	1	0	EBNA2_gain_loop	chr12	56692133	56697209	loop_2214
chr12	56695954	56695954	rs59811639	Height_EAS,Psoriasis_EAS,Blood_protein_levels_EUR,General_risk_tolerance__MTAG_EUR,Height_EUR,Inflammatory_skin_disease_EUR,Psoriasis_EUR,Psoriasis_vulgaris_EUR	1	1	1	1	0	EBNA2_gain_loop	chr12	56692133	56697209	loop_2214
chr12	56696056	56696056	rs41363748	Height_EAS,Psoriasis_EAS,Blood_protein_levels_EUR,General_risk_tolerance__MTAG_EUR,Height_EUR,Inflammatory_skin_disease_EUR,Psoriasis_EUR,Psoriasis_vulgaris_EUR	1	1	1	1	0	EBNA2_gain_loop	chr12	56692133	56697209	loop_2214
chr12	56696545	56696545	rs116934693	Height_EAS,Psoriasis_EAS,General_risk_tolerance__MTAG_EUR,Height_EUR,Inflammatory_skin_disease_EUR,Psoriasis_EUR,Psoriasis_vulgaris_EUR	1	1	1	1	0	EBNA2_gain_loop	chr12	56692133	56697209	loop_2214
chr12	56696742	56696742	rs41392645	Height_EAS,Psoriasis_EAS,Blood_protein_levels_EUR,General_risk_tolerance__MTAG_EUR,Height_EUR,Inflammatory_skin_disease_EUR,Psoriasis_EUR,Psoriasis_vulgaris_EUR	1	1	1	1	0	EBNA2_gain_loop	chr12	56692133	56697209	loop_2214
chr12	56697110	56697110	rs2695788	Height_EAS,Psoriasis_EAS,Blood_protein_levels_EUR,General_risk_tolerance__MTAG_EUR,Height_EUR,Inflammatory_skin_disease_EUR,Psoriasis_EUR,Psoriasis_vulgaris_EUR	1	1	1	1	0	EBNA2_gain_loop	chr12	56692133	56697209	loop_2214
chr12	56708576	56708576	rs59295315	Height_EAS,Psoriasis_EAS,Blood_protein_levels_EUR,General_risk_tolerance__MTAG_EUR,Height_EUR,Inflammatory_skin_disease_EUR,Psoriasis_EUR,Psoriasis_vulgaris_EUR	1	1	1	1	0	EBNA2_gain_loop	chr12	56708398	56711736	loop_2213
chr12	56709919	56709919	rs3809128	Height_EAS,Waist_circumference_adjusted_for_body_mass_index_EAS	0	0	0	0	0	EBNA2_gain_loop	chr12	56708398	56711736	loop_2213
chr12	57038170	57038170	rs10716881	Atrial_fibrillation_EAS,Diastolic_blood_pressure_EUR,High_light_scatter_reticulocyte_count_EUR,High_light_scatter_reticulocyte_percentage_of_red_cells_EUR,Mean_platelet_volume_EUR,Platelet_distribution_width_EUR	0	0	0	0	0	EBNA2_gain_loop	chr12	57037901	57041261	loop_2214
chr12	57038332	57038332	rs2950394	Atrial_fibrillation_AFR,QRS_duration_AFR,Atrial_fibrillation_AMR,Atrial_fibrillation_EAS,Atrial_fibrillation_EUR,QRS_duration_EUR	0	0	0	0	0	EBNA2_gain_loop	chr12	57037901	57041261	loop_2214
chr12	57610249	57610249	rs78558633	Photic_sneeze_reflex_EUR	0	0	0	0	0	EBNA2_gain_loop	chr12	57610084	57612345	loop_2221
chr12	57618619	57618619	rs61736007	Blood_protein_levels_EUR	0	0	0	0	0	EBNA2_gain_loop	chr12	57618458	57620381	loop_2222
chr12	57619362	57619362	rs10783816	Photic_sneeze_reflex_EUR	0	0	0	0	0	EBNA2_gain_loop	chr12	57618458	57620381	loop_2222
chr12	57620254	57620254	rs11612551	Blood_protein_levels_EUR	0	0	0	0	0	EBNA2_gain_loop	chr12	57618458	57620381	loop_2222
chr12	57622821	57622821	rs7301155	Photic_sneeze_reflex_EUR	0	0	0	0	0	EBNA2_gain_loop	chr12	57622766	57625571	loop_2223
chr12	57623091	57623091	rs10717122	Photic_sneeze_reflex_EUR	0	0	0	0	0	EBNA2_gain_loop	chr12	57622766	57625571	loop_2223
chr12	57766392	57766392	rs4760254	High_density_lipoprotein_cholesterol_levels_AFR,Triglycerides_AFR,High_density_lipoprotein_cholesterol_levels_AMR,Triglycerides_AMR,HDL_cholesterol_levels_EAS,Triglyceride_levels_EAS,Glomerular_filtration_rate__creatinine_EUR,HDL_cholesterol_EUR,HDL_cholesterol_levels_EUR,High_density_lipoprotein_cholesterol_levels_EUR,Serum_uric_acid_levels_EUR,Triglyceride_levels_EUR,Triglycerides_EUR,Urate_lev…	0	0	0	0	0	EBNA2_gain_loop	chr12	57765887	57767546	loop_2228
chr12	57767214	57767214	rs12820078	Chronotype_EUR	0	0	0	0	0	EBNA2_gain_loop	chr12	57765887	57767546	loop_2228
chr12	57848639	57848639	rs3809114	HDL_cholesterol_AFR,HDL_cholesterol_AMR,Platelet_count_EUR	0	0	0	0	0	EBNA2_gain_loop	chr12	57847209	57850562	loop_2228
chr12	57848708	57848708	rs3809113	HDL_cholesterol_AFR	0	0	0	0	0	EBNA2_gain_loop	chr12	57847209	57850562	loop_2228
chr12	58165085	58165085	rs10877013	Multiple_sclerosis_EUR,Self_reported_math_ability__MTAG_EUR	1	0	1	0	0	EBNA2_loss_loop	chr12	58164555	58166891	loop_48
chr12	58166403	58166403	rs2291617	Multiple_sclerosis_EUR,Self_reported_math_ability__MTAG_EUR	1	0	1	0	0	EBNA2_loss_loop	chr12	58164555	58166891	loop_48
chr12	58287630	58287630	rs7971877	Intelligence__MTAG_EUR	0	0	0	0	0	EBNA2_loss_loop	chr12	58287417	58295711	loop_48
chr12	58288363	58288363	rs4128707	Intelligence__MTAG_EUR	0	0	0	0	0	EBNA2_loss_loop	chr12	58287417	58295711	loop_48
chr12	58288793	58288793	rs6581157	Cognitive_performance__MTAG_EUR,Educational_attainment__MTAG_EUR,Intelligence_EUR	0	0	0	0	0	EBNA2_loss_loop	chr12	58287417	58295711	loop_48
chr12	58289072	58289072	rs6650217	Intelligence__MTAG_EUR	0	0	0	0	0	EBNA2_loss_loop	chr12	58287417	58295711	loop_48
chr12	58289078	58289078	rs6650218	Intelligence__MTAG_EUR	0	0	0	0	0	EBNA2_loss_loop	chr12	58287417	58295711	loop_48
chr12	58289100	58289100	rs6650219	Intelligence__MTAG_EUR	0	0	0	0	0	EBNA2_loss_loop	chr12	58287417	58295711	loop_48
chr12	58290226	58290226	rs3751330	Intelligence__MTAG_EUR	0	0	0	0	0	EBNA2_loss_loop	chr12	58287417	58295711	loop_48
chr12	58290278	58290278	rs3751331	Cognitive_performance__MTAG_EUR,Educational_attainment__MTAG_EUR,Intelligence_EUR	0	0	0	0	0	EBNA2_loss_loop	chr12	58287417	58295711	loop_48
chr12	58291574	58291574	rs11172375	Cognitive_performance__MTAG_EUR,Educational_attainment__MTAG_EUR,Intelligence_EUR	0	0	0	0	0	EBNA2_loss_loop	chr12	58287417	58295711	loop_48
chr12	58292707	58292707	rs1962047	Cognitive_performance__MTAG_EUR,Educational_attainment__MTAG_EUR,Intelligence_EUR	0	0	0	0	0	EBNA2_loss_loop	chr12	58287417	58295711	loop_48
chr12	58294344	58294344	rs61935769	Cognitive_performance__MTAG_EUR,Educational_attainment__MTAG_EUR,Intelligence_EUR	0	0	0	0	0	EBNA2_loss_loop	chr12	58287417	58295711	loop_48
chr12	58295270	58295270	rs140185971	Cognitive_performance__MTAG_EUR,Educational_attainment__MTAG_EUR,Intelligence_EUR,Intelligence__MTAG_EUR	0	0	0	0	0	EBNA2_loss_loop	chr12	58287417	58295711	loop_48
chr12	58295300	58295300	rs71084794	Cognitive_performance__MTAG_EUR,Educational_attainment__MTAG_EUR,Intelligence_EUR,Intelligence__MTAG_EUR	0	0	0	0	0	EBNA2_loss_loop	chr12	58287417	58295711	loop_48
chr12	70091356	70091356	rs710710	Atrial_fibrillation_EAS	0	0	0	0	0	EBNA2_gain_loop	chr12	70091138	70095608	loop_2233
chr12	70092795	70092795	chr12_70092795	Response_to_anti_retroviral_therapy__ddI_d4T__in_HIV_1_infection__Grade_3_peripheral_neuropathy_EUR	0	0	1	0	0	EBNA2_gain_loop	chr12	70091138	70095608	loop_2233
chr12	70092796	70092796	chr12_70092796	Response_to_anti_retroviral_therapy__ddI_d4T__in_HIV_1_infection__Grade_3_peripheral_neuropathy_EUR	0	0	1	0	0	EBNA2_gain_loop	chr12	70091138	70095608	loop_2233
chr12	70093560	70093560	rs10161236	Atrial_fibrillation_EAS	0	0	0	0	0	EBNA2_gain_loop	chr12	70091138	70095608	loop_2233
chr12	70093650	70093650	rs775433	Atrial_fibrillation_EAS	0	0	0	0	0	EBNA2_gain_loop	chr12	70091138	70095608	loop_2233
chr12	70094528	70094528	rs775435	Atrial_fibrillation_EAS	0	0	0	0	0	EBNA2_gain_loop	chr12	70091138	70095608	loop_2233
chr12	90470964	90470964	rs7488228	Chronotype_EUR,Morning_person_EUR	0	0	0	0	0	EBNA2_open_Chromatin	chr12	90470567	90471055	252
chr12	95611141	95611141	rs6538617	Endometriosis_EAS,Exudative_age_related_macular_degeneration_EAS	0	0	0	0	0	EBNA2_down_genes	chr12	95610739	95611739	FGD6
chr12	109029909	109029909	rs1420662	Low_density_lipoprotein_cholesterol_levels_EAS,Total_cholesterol_levels_EAS	0	0	0	0	0	EBNA2_up_genes	chr12	109029085	109030085	MIR4496
chr12	109029940	109029940	rs1420661	Low_density_lipoprotein_cholesterol_levels_EAS,Total_cholesterol_levels_EAS	0	0	0	0	0	EBNA2_up_genes	chr12	109029085	109030085	MIR4496
chr12	110330104	110330104	rs76337025	Systolic_blood_pressure_EAS	0	0	0	0	0	EBNA2_gain_loop	chr12	110329572	110331585	loop_2252
chr12	110330767	110330767	rs75056482	Systolic_blood_pressure_EAS	0	0	0	0	0	EBNA2_gain_loop	chr12	110329572	110331585	loop_2252
chr12	110331040	110331040	rs11068789	Systolic_blood_pressure_EAS	0	0	0	0	0	EBNA2_gain_loop	chr12	110329572	110331585	loop_2252
chr12	110448202	110448202	rs11064715	Systolic_blood_pressure_AFR,Systolic_blood_pressure_AMR,Systolic_blood_pressure_EAS	0	0	0	0	0	EBNA2_gain_loop	chr12	110447909	110451486	loop_2252
chr12	110450687	110450687	rs7976412	Pulse_pressure_EAS,Systolic_blood_pressure_EAS	0	0	0	0	0	EBNA2_gain_loop	chr12	110447909	110451486	loop_2252
chr12	110888857	110888857	rs3759384	Schizophrenia_EAS	0	0	0	0	0	EBNA2_gain_loop	chr12	110886816	110889764	loop_2256
chr12	110889072	110889072	rs7312469	Headache_EUR	0	0	0	0	0	EBNA2_gain_loop	chr12	110886816	110889764	loop_2256
chr12	110889483	110889483	rs3759382	Headache_EUR	0	0	0	0	0	EBNA2_gain_loop	chr12	110886816	110889764	loop_2256
chr12	110894557	110894557	rs11065647	Schizophrenia_EAS	0	0	0	0	0	EBNA2_gain_loop	chr12	110893170	110896858	loop_2256
chr12	110967652	110967652	rs73191839	Headache_EUR	0	0	0	0	0	EBNA2_gain_loop	chr12	110967499	110972486	loop_2262
chr12	110968180	110968180	rs149557420	Headache_EUR	0	0	0	0	0	EBNA2_gain_loop	chr12	110967499	110972486	loop_2262
chr12	110970457	110970457	rs73191840	Headache_EUR	0	0	0	0	0	EBNA2_gain_loop	chr12	110967499	110972486	loop_2262
chr12	110971666	110971666	rs16940885	Headache_EUR	0	0	0	0	0	EBNA2_gain_loop	chr12	110967499	110972486	loop_2262
chr12	111020179	111020179	rs74728497	Headache_EUR	0	0	0	0	0	EBNA2_gain_loop	chr12	111019520	111022047	loop_2264
chr12	111044793	111044793	rs146921795	Headache_EUR	0	0	0	0	0	EBNA2_gain_loop	chr12	111042066	111046032	loop_2263
chr12	111083980	111083980	rs3893403	Headache_EUR	0	0	0	0	0	EBNA2_gain_loop	chr12	111083927	111088742	loop_2271
chr12	111086449	111086449	rs56324794	Headache_EUR	0	0	0	0	0	EBNA2_gain_loop	chr12	111083927	111088742	loop_2271
chr12	111086593	111086593	rs57111495	Headache_EUR	0	0	0	0	0	EBNA2_gain_loop	chr12	111083927	111088742	loop_2271
chr12	112544195	112544195	rs61309313	High_light_scatter_reticulocyte_count_EUR,High_light_scatter_reticulocyte_percentage_of_red_cells_EUR,Reticulocyte_count_EUR,Reticulocyte_fraction_of_red_cells_EUR	0	0	0	0	0	EBNA2_gain_loop	chr12	112543651	112547658	loop_2280
chr12	112545373	112545373	rs3841472	Body_mass_index_EAS,Metabolic_syndrome_EAS	0	0	0	0	0	EBNA2_gain_loop	chr12	112543651	112547658	loop_2280
chr12	112545983	112545983	rs11066169	Body_mass_index_EAS,Metabolic_syndrome_EAS	0	0	0	0	0	EBNA2_gain_loop	chr12	112543651	112547658	loop_2280
chr12	112546183	112546183	rs78833544	Body_mass_index_EAS,Metabolic_syndrome_EAS	0	0	0	0	0	EBNA2_gain_loop	chr12	112543651	112547658	loop_2280
chr12	112546345	112546345	rs76653694	Body_mass_index_EAS,Metabolic_syndrome_EAS	0	0	0	0	0	EBNA2_gain_loop	chr12	112543651	112547658	loop_2280
chr12	112856643	112856643	rs58805176	High_light_scatter_reticulocyte_count_EUR,High_light_scatter_reticulocyte_percentage_of_red_cells_EUR,Reticulocyte_count_EUR,Reticulocyte_fraction_of_red_cells_EUR	0	0	0	0	0	EBNA2_gain_loop	chr12	112855524	112858383	loop_2280
chr12	113668132	113668132	rs78223380	Body_mass_index_EUR	0	0	0	0	0	EBNA2_loss_loop	chr12	113666187	113671942	loop_52
chr12	113669902	113669902	rs61943584	Body_mass_index_EUR	0	0	0	0	0	EBNA2_loss_loop	chr12	113666187	113671942	loop_52
chr12	113671141	113671141	rs61943585	Body_mass_index_EUR	0	0	0	0	0	EBNA2_loss_loop	chr12	113666187	113671942	loop_52
chr12	113671189	113671189	rs61943586	Body_mass_index_EUR	0	0	0	0	0	EBNA2_loss_loop	chr12	113666187	113671942	loop_52
chr12	113671494	113671494	rs61943587	Body_mass_index_EUR	0	0	0	0	0	EBNA2_loss_loop	chr12	113666187	113671942	loop_52
chr12	116632928	116632928	rs17426844	Pulse_pressure_EUR	0	0	0	0	0	EBNA2_closed_chromatin	chr12	116632662	116633151	353
chr12	116714815	116714815	chr12_116714815	Pulse_pressure_EUR	0	0	0	0	0	EBNA2_down_genes	chr12	116714490	116715490	MED13L
chr12	120663288	120663288	rs2283362	Platelet_count_EAS	0	0	0	0	0	EBNA2_gain_loop	chr12	120662435	120664781	loop_2291
chr12	120729474	120729474	rs16950044	Diastolic_blood_pressure_EUR	0	0	0	0	0	EBNA2_gain_loop	chr12	120728692	120731869	loop_2291
chr12	120729498	120729498	rs16950047	Diastolic_blood_pressure_EUR	0	0	0	0	0	EBNA2_gain_loop	chr12	120728692	120731869	loop_2291
chr12	120729530	120729530	rs77921082	Diastolic_blood_pressure_EUR	0	0	0	0	0	EBNA2_gain_loop	chr12	120728692	120731869	loop_2291
chr12	120730869	120730869	rs3847968	Diastolic_blood_pressure_EUR	0	0	0	0	0	EBNA2_gain_loop	chr12	120728692	120731869	loop_2291
chr12	120731003	120731003	rs3847969	Diastolic_blood_pressure_EUR	0	0	0	0	0	EBNA2_gain_loop	chr12	120728692	120731869	loop_2291
chr12	121105555	121105555	rs6490300	Mean_corpuscular_hemoglobin_EUR,Mean_corpuscular_volume_EUR,Red_blood_cell_count_EUR,Red_cell_distribution_width_EUR	0	0	0	0	0	EBNA2_gain_loop	chr12	121105528	121108746	loop_2295
chr12	121123747	121123747	rs34171664	Red_blood_cell_count_EUR	0	0	0	0	0	EBNA2_gain_loop	chr12	121121531	121126267	loop_2295
chr12	122442381	122442381	rs12809676	Mean_platelet_volume_EUR	0	0	0	0	0	EBNA2_gain_loop	chr12	122440915	122449443	loop_2299
chr12	122445233	122445233	rs1169085	Blood_metabolite_levels_EUR	0	0	0	0	0	EBNA2_gain_loop	chr12	122440915	122449443	loop_2299
chr12	123355917	123355917	rs142670389	Waist_to_hip_ratio_adjusted_for_BMI__additive_genetic_model_EAS	0	0	0	0	0	EBNA2_gain_loop	chr12	123355193	123357737	loop_2313
chr12	123464279	123464279	rs3759115	Intelligence_EUR,Macular_thickness_EUR	0	0	0	0	0	EBNA2_gain_loop	chr12	123463227	123467075	loop_2316
chr12	123466111	123466111	rs55742290	Intelligence_EUR,Macular_thickness_EUR	0	0	0	0	0	EBNA2_gain_loop	chr12	123463227	123467075	loop_2316
chr12	123560289	123560289	rs1260294	Type_2_diabetes_AMR,Diastolic_blood_pressure_EAS,Allergic_disease__asthma__hay_fever_or_eczema_EUR,Allergic_rhinitis_EUR,Allergy_EUR,Body_fat_distribution__leg_fat_ratio_EUR,Body_fat_distribution__trunk_fat_ratio_EUR,Diastolic_blood_pressure_EUR,Educational_attainment__college_completion_EUR,Heel_bone_mineral_density_EUR,Height_EUR,Highest_math_class_taken_EUR,Highest_math_class_taken__MTAG_EUR,H…	1	0	1	1	0	EBNA2_gain_loop	chr12	123558816	123561772	loop_2317
chr12	123561422	123561422	rs148548146	Waist_to_hip_ratio_adjusted_for_BMI__additive_genetic_model_EAS	0	0	0	0	0	EBNA2_gain_loop	chr12	123558816	123561772	loop_2317
chr12	123566508	123566508	chr12_123566508	Waist_to_hip_ratio_adjusted_for_BMI__additive_genetic_model_AFR	0	0	0	0	0	EBNA2_gain_loop	chr12	123564131	123571067	loop_2316
chr12	123568619	123568619	rs4148862	Intelligence_EUR,Macular_thickness_EUR	0	0	0	0	0	EBNA2_gain_loop	chr12	123564131	123571067	loop_2316
chr12	123569375	123569375	rs4148863	Intelligence_EUR,Macular_thickness_EUR,Schizophrenia_EUR	0	0	0	0	0	EBNA2_gain_loop	chr12	123564131	123571067	loop_2316
chr12	123604053	123604053	rs7975763	Multiple_sclerosis_EUR	1	0	1	0	0	EBNA2_gain_loop	chr12	123603740	123608108	loop_2320
chr12	123604492	123604492	rs1790121	Intelligence_EUR,Macular_thickness_EUR,Schizophrenia_EUR	0	0	0	0	0	EBNA2_gain_loop	chr12	123603740	123608108	loop_2320
chr12	123606739	123606739	rs1790122	Intelligence_EUR,Macular_thickness_EUR,Schizophrenia_EUR	0	0	0	0	0	EBNA2_gain_loop	chr12	123603740	123608108	loop_2320
chr12	123626982	123626982	rs1106240	Type_2_diabetes_AMR,Type_2_diabetes_EAS,Allergic_disease__asthma__hay_fever_or_eczema_EUR,Allergic_rhinitis_EUR,Allergy_EUR,Diastolic_blood_pressure_EUR,Educational_attainment__college_completion_EUR,Heel_bone_mineral_density_EUR,Height_EUR,Highest_math_class_taken_EUR,Highest_math_class_taken__MTAG_EUR,Hip_circumference_adjusted_for_BMI_EUR,Intelligence__MTAG_EUR,Knee_osteoarthritis_EUR,Lymphocy…	1	0	1	1	0	EBNA2_gain_loop	chr12	123623671	123627683	loop_2322
chr12	123627016	123627016	rs1106241	Type_2_diabetes_AMR,Type_2_diabetes_EAS,Allergic_disease__asthma__hay_fever_or_eczema_EUR,Allergic_rhinitis_EUR,Allergy_EUR,Diastolic_blood_pressure_EUR,Educational_attainment__college_completion_EUR,Heel_bone_mineral_density_EUR,Height_EUR,Highest_math_class_taken_EUR,Highest_math_class_taken__MTAG_EUR,Hip_circumference_adjusted_for_BMI_EUR,Intelligence__MTAG_EUR,Knee_osteoarthritis_EUR,Lymphocy…	0	0	1	1	0	EBNA2_gain_loop	chr12	123623671	123627683	loop_2322
chr12	123627429	123627429	rs60824594	Hip_circumference_adjusted_for_BMI_EUR,Intelligence__MTAG_EUR	0	0	0	0	0	EBNA2_gain_loop	chr12	123623671	123627683	loop_2322
chr12	123634043	123634043	rs949142	Type_2_diabetes_AMR,Type_2_diabetes_EAS,Allergic_disease__asthma__hay_fever_or_eczema_EUR,Allergic_rhinitis_EUR,Allergy_EUR,Diastolic_blood_pressure_EUR,Educational_attainment__college_completion_EUR,Heel_bone_mineral_density_EUR,Height_EUR,Highest_math_class_taken_EUR,Highest_math_class_taken__MTAG_EUR,Hip_circumference_adjusted_for_BMI_EUR,Intelligence__MTAG_EUR,Knee_osteoarthritis_EUR,Lymphocy…	0	0	1	1	0	EBNA2_gain_loop	chr12	123633589	123638089	loop_2322
chr12	123634122	123634122	rs884548	Type_2_diabetes_AMR,Type_2_diabetes_EAS,Allergic_disease__asthma__hay_fever_or_eczema_EUR,Allergic_rhinitis_EUR,Allergy_EUR,Diastolic_blood_pressure_EUR,Educational_attainment__college_completion_EUR,Heel_bone_mineral_density_EUR,Height_EUR,Highest_math_class_taken_EUR,Highest_math_class_taken__MTAG_EUR,Hip_circumference_adjusted_for_BMI_EUR,Intelligence__MTAG_EUR,Knee_osteoarthritis_EUR,Lymphocy…	0	0	1	1	0	EBNA2_gain_loop	chr12	123633589	123638089	loop_2322
chr12	123635096	123635096	rs1716183	Type_2_diabetes_EAS,Asthma__childhood_onset_EUR	0	0	1	1	0	EBNA2_gain_loop	chr12	123633589	123638089	loop_2322
chr12	123636841	123636841	rs1790108	Type_2_diabetes_EAS,Allergic_disease__asthma__hay_fever_or_eczema_EUR,Allergic_rhinitis_EUR,Allergy_EUR,Diastolic_blood_pressure_EUR,Educational_attainment__college_completion_EUR,Heel_bone_mineral_density_EUR,Height_EUR,Highest_math_class_taken_EUR,Highest_math_class_taken__MTAG_EUR,Hip_circumference_adjusted_for_BMI_EUR,Intelligence__MTAG_EUR,Knee_osteoarthritis_EUR,Lymphocyte_percentage_of_whi…	0	0	1	1	0	EBNA2_gain_loop	chr12	123633589	123638089	loop_2322
chr12	123637509	123637509	rs1716184	Schizophrenia_EAS,Autism_spectrum_disorder_or_schizophrenia_EUR,Intelligence_EUR,Macular_thickness_EUR,Schizophrenia_EUR	0	0	0	0	0	EBNA2_gain_loop	chr12	123633589	123638089	loop_2322
chr12	123637752	123637752	rs1790109	Type_2_diabetes_EAS,Allergic_disease__asthma__hay_fever_or_eczema_EUR,Allergic_rhinitis_EUR,Allergy_EUR,Diastolic_blood_pressure_EUR,Educational_attainment__college_completion_EUR,Heel_bone_mineral_density_EUR,Height_EUR,Highest_math_class_taken_EUR,Highest_math_class_taken__MTAG_EUR,Hip_circumference_adjusted_for_BMI_EUR,Intelligence__MTAG_EUR,Knee_osteoarthritis_EUR,Lymphocyte_percentage_of_whi…	0	0	1	1	0	EBNA2_gain_loop	chr12	123633589	123638089	loop_2322
chr12	123638070	123638070	rs1716185	Type_2_diabetes_EAS,Allergic_disease__asthma__hay_fever_or_eczema_EUR,Allergic_rhinitis_EUR,Allergy_EUR,Diastolic_blood_pressure_EUR,Educational_attainment__college_completion_EUR,Heel_bone_mineral_density_EUR,Height_EUR,Highest_math_class_taken_EUR,Highest_math_class_taken__MTAG_EUR,Hip_circumference_adjusted_for_BMI_EUR,Intelligence__MTAG_EUR,Knee_osteoarthritis_EUR,Lymphocyte_percentage_of_whi…	0	0	1	1	0	EBNA2_gain_loop	chr12	123633589	123638089	loop_2322
chr12	123716376	123716376	rs1716171	Diastolic_blood_pressure_EAS,Allergic_disease__asthma__hay_fever_or_eczema_EUR,Allergic_rhinitis_EUR,Allergy_EUR,Diastolic_blood_pressure_EUR,Educational_attainment__college_completion_EUR,Heel_bone_mineral_density_EUR,Height_EUR,Highest_math_class_taken_EUR,Highest_math_class_taken__MTAG_EUR,Hip_circumference_adjusted_for_BMI_EUR,Intelligence__MTAG_EUR,Knee_osteoarthritis_EUR,Lymphocyte_percenta…	0	0	1	1	0	EBNA2_gain_loop	chr12	123716194	123719005	loop_2313
chr12	123716466	123716466	rs75037792	Albumin_globulin_ratio_EAS,Schizophrenia_EUR	0	0	0	0	0	EBNA2_gain_loop	chr12	123716194	123719005	loop_2313
chr12	123716513	123716513	rs1716170	Diastolic_blood_pressure_EAS,Allergic_disease__asthma__hay_fever_or_eczema_EUR,Allergic_rhinitis_EUR,Allergy_EUR,Diastolic_blood_pressure_EUR,Educational_attainment__college_completion_EUR,Heel_bone_mineral_density_EUR,Height_EUR,Highest_math_class_taken_EUR,Highest_math_class_taken__MTAG_EUR,Hip_circumference_adjusted_for_BMI_EUR,Intelligence__MTAG_EUR,Knee_osteoarthritis_EUR,Lymphocyte_percenta…	0	0	1	1	0	EBNA2_gain_loop	chr12	123716194	123719005	loop_2313
chr12	123716930	123716930	rs1716169	Diastolic_blood_pressure_AMR,Type_2_diabetes_AMR,Allergic_disease__asthma__hay_fever_or_eczema_EUR,Allergic_rhinitis_EUR,Allergy_EUR,Diastolic_blood_pressure_EUR,Educational_attainment__college_completion_EUR,Heel_bone_mineral_density_EUR,Height_EUR,Highest_math_class_taken_EUR,Highest_math_class_taken__MTAG_EUR,Hip_circumference_adjusted_for_BMI_EUR,Intelligence__MTAG_EUR,Knee_osteoarthritis_EUR…	0	0	1	1	0	EBNA2_gain_loop	chr12	123716194	123719005	loop_2313
chr12	123717216	123717216	rs28362667	Albumin_globulin_ratio_EAS,Schizophrenia_EUR	0	0	0	0	0	EBNA2_gain_loop	chr12	123716194	123719005	loop_2313
chr12	123717354	123717354	rs28362669	Albumin_globulin_ratio_EAS,Schizophrenia_EUR	0	0	0	0	0	EBNA2_gain_loop	chr12	123716194	123719005	loop_2313
chr12	123717362	123717362	rs1619283	Albumin_globulin_ratio_EAS,Autism_spectrum_disorder_or_schizophrenia_EUR,Cognitive_ability__MTAG_EUR,Cognitive_performance__MTAG_EUR,Educational_attainment__MTAG_EUR,Educational_attainment__years_of_education_EUR,Intelligence_EUR,Schizophrenia_EUR	0	0	0	0	0	EBNA2_gain_loop	chr12	123716194	123719005	loop_2313
chr12	123717689	123717689	rs146239222	Albumin_globulin_ratio_EAS,Autism_spectrum_disorder_or_schizophrenia_EUR,Cognitive_ability__MTAG_EUR,Cognitive_performance__MTAG_EUR,Educational_attainment__MTAG_EUR,Educational_attainment__years_of_education_EUR,High_density_lipoprotein_cholesterol_levels_EUR,Lymphocyte_counts_EUR,Schizophrenia_EUR	0	0	1	0	0	EBNA2_gain_loop	chr12	123716194	123719005	loop_2313
chr12	123718301	123718301	rs1727332	Albumin_globulin_ratio_EAS,Autism_spectrum_disorder_or_schizophrenia_EUR,Cognitive_ability__MTAG_EUR,Cognitive_performance__MTAG_EUR,Educational_attainment__MTAG_EUR,Educational_attainment__years_of_education_EUR,High_density_lipoprotein_cholesterol_levels_EUR,Lymphocyte_counts_EUR,Schizophrenia_EUR	0	0	1	0	0	EBNA2_gain_loop	chr12	123716194	123719005	loop_2313
chr12	123718879	123718879	rs1727331	Albumin_globulin_ratio_EAS,Autism_spectrum_disorder_or_schizophrenia_EUR,Cognitive_ability__MTAG_EUR,Cognitive_performance__MTAG_EUR,Educational_attainment__MTAG_EUR,Educational_attainment__years_of_education_EUR,High_density_lipoprotein_cholesterol_levels_EUR,Lymphocyte_counts_EUR,Schizophrenia_EUR	0	0	1	0	0	EBNA2_gain_loop	chr12	123716194	123719005	loop_2313
chr12	129302867	129302867	rs12321643	Systemic_lupus_erythematosus_EAS	1	1	1	0	0	EBNA2_allelic	chr12	129302866	129302867	rs12321643
chr12	131463252	131463252	rs884280	Amyotrophic_lateral_sclerosis__sporadic_EAS	0	0	0	0	0	EBNA2_gain_loop	chr12	131463223	131468322	loop_2334
chr12	131463726	131463726	rs10219597	Amyotrophic_lateral_sclerosis__sporadic_EAS	0	0	0	0	0	EBNA2_gain_loop	chr12	131463223	131468322	loop_2334
chr12	131464024	131464024	rs2141188	Amyotrophic_lateral_sclerosis__sporadic_EAS	0	0	0	0	0	EBNA2_gain_loop	chr12	131463223	131468322	loop_2334
chr12	131464885	131464885	rs2030933	Amyotrophic_lateral_sclerosis__sporadic_EAS	0	0	0	0	0	EBNA2_gain_loop	chr12	131463223	131468322	loop_2334
chr12	131467191	131467191	rs6486618	Amyotrophic_lateral_sclerosis__sporadic_EAS	0	0	0	0	0	EBNA2_gain_loop	chr12	131463223	131468322	loop_2334
chr12	131467634	131467634	rs7969971	Amyotrophic_lateral_sclerosis__sporadic_EAS	0	0	0	0	0	EBNA2_gain_loop	chr12	131463223	131468322	loop_2334
chr12	131467769	131467769	rs10744488	Amyotrophic_lateral_sclerosis__sporadic_EAS	0	0	0	0	0	EBNA2_gain_loop	chr12	131463223	131468322	loop_2334
chr12	131468189	131468189	rs10744489	Amyotrophic_lateral_sclerosis__sporadic_EAS	0	0	0	0	0	EBNA2_gain_loop	chr12	131463223	131468322	loop_2334
chr13	24462999	24462999	rs9553088	Myopia__pathological_EAS	0	0	0	0	0	EBNA2_open_Chromatin	chr13	24462904	24463835	606
chr13	24463618	24463618	rs2077440	Myopia__pathological_EAS	0	0	0	0	0	EBNA2_open_Chromatin	chr13	24462904	24463835	606
chr13	25258233	25258233	rs56083529	Diastolic_blood_pressure_EUR	0	0	0	0	0	EBNA2_open_Chromatin	chr13	25258064	25258369	156
chr13	28034186	28034186	rs4769556	Body_mass_index_EAS	0	0	0	0	0	EBNA2_closed_chromatin	chr13	28033633	28034202	378
chr13	28034186	28034186	rs4769556	Body_mass_index_EAS	0	0	0	0	0	EBNA2_closed_chromatin	chr13	28033633	28034237	378
chr13	31016979	31016979	rs1331698	Body_fat_percentage_EUR	0	0	0	0	0	EBNA2_gain_loop	chr13	31016818	31020421	loop_2340
chr13	31017258	31017258	rs12855502	Body_fat_percentage_EUR	0	0	0	0	0	EBNA2_gain_loop	chr13	31016818	31020421	loop_2340
chr13	31017268	31017268	rs12856169	Body_fat_percentage_EUR	0	0	0	0	0	EBNA2_gain_loop	chr13	31016818	31020421	loop_2340
chr13	31019580	31019580	rs73167313	Male_pattern_baldness_EUR,Smoking_initiation__ever_regular_vs_never_regular___MTAG_EUR	0	0	0	0	0	EBNA2_gain_loop	chr13	31016818	31020421	loop_2340
chr13	41020877	41020877	rs34233350	Chronic_inflammatory_diseases__ankylosing_spondylitis__Crohn_s_disease__psoriasis__primary_sclerosing_cholangitis__ulcerative_colitis___pleiotropy_EUR,Inflammatory_bowel_disease_EUR,Ulcerative_colitis_EUR	1	1	1	0	1	EBNA2_loss_loop	chr13	41017644	41022008	loop_55
chr13	41153585	41153585	rs9532562	Allergic_disease__asthma__hay_fever_or_eczema_EUR,Mean_corpuscular_volume_EUR	0	0	1	1	0	EBNA2_loss_loop	chr13	41153100	41157869	loop_56
chr13	41154792	41154792	rs61963264	Allergic_disease__asthma__hay_fever_or_eczema_EUR,Mean_corpuscular_volume_EUR	0	0	1	1	0	EBNA2_loss_loop	chr13	41153100	41157869	loop_56
chr13	41156188	41156188	rs2721066	Eosinophil_counts_EUR,Eosinophil_percentage_of_granulocytes_EUR,Eosinophil_percentage_of_white_cells_EUR,Granulocyte_percentage_of_myeloid_white_cells_EUR,Monocyte_count_EUR,Monocyte_percentage_of_white_cells_EUR,Sum_eosinophil_basophil_counts_EUR	0	0	1	0	0	EBNA2_loss_loop	chr13	41153100	41157869	loop_56
chr13	41156708	41156708	rs2721067	Eosinophil_counts_EUR,Eosinophil_percentage_of_granulocytes_EUR,Eosinophil_percentage_of_white_cells_EUR,Granulocyte_percentage_of_myeloid_white_cells_EUR,Monocyte_count_EUR,Monocyte_percentage_of_white_cells_EUR,Sum_eosinophil_basophil_counts_EUR	0	0	1	0	0	EBNA2_loss_loop	chr13	41153100	41157869	loop_56
chr13	41156938	41156938	rs2755216	Eosinophil_counts_EUR,Eosinophil_percentage_of_granulocytes_EUR,Eosinophil_percentage_of_white_cells_EUR,Granulocyte_percentage_of_myeloid_white_cells_EUR,Monocyte_count_EUR,Monocyte_percentage_of_white_cells_EUR,Sum_eosinophil_basophil_counts_EUR	0	0	1	0	0	EBNA2_loss_loop	chr13	41153100	41157869	loop_56
chr13	41157372	41157372	rs2701869	Eosinophil_counts_EUR,Eosinophil_percentage_of_granulocytes_EUR,Eosinophil_percentage_of_white_cells_EUR,Granulocyte_percentage_of_myeloid_white_cells_EUR,Monocyte_count_EUR,Monocyte_percentage_of_white_cells_EUR,Sum_eosinophil_basophil_counts_EUR	0	0	1	0	0	EBNA2_loss_loop	chr13	41153100	41157869	loop_56
chr13	41332592	41332592	rs146106206	Mean_corpuscular_hemoglobin_EAS,Mean_corpuscular_volume_EAS,Red_blood_cell_count_EAS,White_blood_cell_count__basophil_EAS	0	0	1	0	0	EBNA2_loss_loop	chr13	41332464	41333848	loop_58
chr13	41544501	41544501	rs147730255	Corneal_structure_EAS,Intraocular_pressure_EAS	0	0	0	0	0	EBNA2_loss_loop	chr13	41543974	41545967	loop_59
chr13	41545245	41545245	rs148328873	Corneal_structure_EAS,Intraocular_pressure_EAS	0	0	0	0	0	EBNA2_loss_loop	chr13	41543974	41545967	loop_59
chr13	41568872	41568872	rs80022860	Crohn_s_disease_EAS,Systemic_lupus_erythematosus_EAS	1	1	1	0	1	EBNA2_gain_loop	chr13	41566043	41569860	loop_2355
chr13	41579868	41579868	rs7335629	Crohn_s_disease_EAS,Systemic_lupus_erythematosus_EAS	1	1	1	0	1	EBNA2_gain_loop	chr13	41577659	41583406	loop_2358
chr13	41579868	41579868	rs7335629	Crohn_s_disease_EAS,Systemic_lupus_erythematosus_EAS	1	1	1	0	1	EBNA2_loss_loop	chr13	41577659	41583406	loop_60
chr13	41635301	41635301	rs17532371	Total_cholesterol_levels_AFR,Total_cholesterol_levels_AMR,Total_cholesterol_levels_EUR	0	0	0	0	0	EBNA2_closed_chromatin	chr13	41634180	41636267	1220
chr13	41635301	41635301	rs17532371	Total_cholesterol_levels_AFR,Total_cholesterol_levels_AMR,Total_cholesterol_levels_EUR	0	0	0	0	0	EBNA2_gain_loop	chr13	41633059	41637366	loop_2360
chr13	42103422	42103422	rs9315846	Male_pattern_baldness_EUR	0	0	0	0	0	EBNA2_loss_loop	chr13	42101884	42106567	loop_60
chr13	42104828	42104828	rs1473790	Male_pattern_baldness_EUR	0	0	0	0	0	EBNA2_loss_loop	chr13	42101884	42106567	loop_60
chr13	42162235	42162235	rs11840821	Local_histogram_emphysema_pattern_AFR,Local_histogram_emphysema_pattern_EUR	0	0	0	0	0	EBNA2_loss_loop	chr13	42161872	42166404	loop_61
chr13	42163581	42163581	rs201388761	Local_histogram_emphysema_pattern_AFR,Local_histogram_emphysema_pattern_EUR	0	0	0	0	0	EBNA2_loss_loop	chr13	42161872	42166404	loop_61
chr13	42490008	42490008	rs9315872	Calcium_levels_EUR	0	0	0	0	0	EBNA2_gain_loop	chr13	42488279	42495225	loop_2355
chr13	42492215	42492215	rs9532947	Calcium_levels_EUR	0	0	0	0	0	EBNA2_gain_loop	chr13	42488279	42495225	loop_2355
chr13	42522090	42522090	rs7997953	Calcium_levels_EUR	0	0	0	0	0	EBNA2_gain_loop	chr13	42520179	42523317	loop_2358
chr13	42535935	42535935	rs9532958	Calcium_levels_EUR	0	0	0	0	0	EBNA2_gain_loop	chr13	42533981	42536745	loop_2359
chr13	42536401	42536401	rs7326697	Calcium_levels_EUR	0	0	0	0	0	EBNA2_gain_loop	chr13	42533981	42536745	loop_2359
chr13	51482712	51482712	rs9535525	Systolic_blood_pressure_EUR	0	0	0	0	0	EBNA2_gain_loop	chr13	51482610	51486197	loop_2384
chr13	51484356	51484356	rs2274069	Benign_prostatic_hyperplasia_and_lower_urinary_tract_symptoms_EUR,Benign_prostatic_hyperplasia_and_lower_urinary_tract_symptoms__prostate_cancer_excluded_EUR	0	0	0	0	0	EBNA2_gain_loop	chr13	51482610	51486197	loop_2384
chr13	51484617	51484617	rs9526704	Systolic_blood_pressure_EUR	0	0	0	0	0	EBNA2_gain_loop	chr13	51482610	51486197	loop_2384
chr13	66541144	66541144	rs111985922	Irritable_mood_EUR	0	0	0	0	0	EBNA2_open_Chromatin	chr13	66541115	66541402	145
chr13	76055069	76055069	rs9573562	Mean_corpuscular_hemoglobin_EAS,Mean_corpuscular_volume_EAS,Red_blood_cell_count_EAS	0	0	0	0	0	EBNA2_loss_loop	chr13	76054118	76057410	loop_68
chr13	76055096	76055096	rs9573563	Mean_corpuscular_hemoglobin_EAS,Mean_corpuscular_volume_EAS,Red_blood_cell_count_EAS	0	0	0	0	0	EBNA2_loss_loop	chr13	76054118	76057410	loop_68
chr13	76055602	76055602	rs77685055	Red_blood_cell_count_EAS,Mean_corpuscular_hemoglobin_EUR,Mean_corpuscular_volume_EUR,Red_blood_cell_count_EUR	0	0	0	0	0	EBNA2_loss_loop	chr13	76054118	76057410	loop_68
chr13	76056856	76056856	rs9565167	Mean_corpuscular_hemoglobin_EAS,Mean_corpuscular_volume_EAS,Red_blood_cell_count_EAS,Mean_corpuscular_hemoglobin_EUR,Mean_corpuscular_volume_EUR,Red_blood_cell_count_EUR	0	0	0	0	0	EBNA2_loss_loop	chr13	76054118	76057410	loop_68
chr13	76057043	76057043	rs9573566	Mean_corpuscular_hemoglobin_EAS,Mean_corpuscular_volume_EAS,Red_blood_cell_count_EAS,Mean_corpuscular_hemoglobin_EUR,Mean_corpuscular_volume_EUR,Red_blood_cell_count_EUR	0	0	0	0	0	EBNA2_loss_loop	chr13	76054118	76057410	loop_68
chr13	76057383	76057383	rs9573567	Mean_corpuscular_hemoglobin_EAS,Mean_corpuscular_volume_EAS,Red_blood_cell_count_EAS,Mean_corpuscular_hemoglobin_EUR,Mean_corpuscular_volume_EUR,Red_blood_cell_count_EUR	0	0	0	0	0	EBNA2_loss_loop	chr13	76054118	76057410	loop_68
chr13	99738554	99738554	rs117633128	Lung_function__FEV1_FVC_EUR	0	0	0	0	0	EBNA2_gain_loop	chr13	99737403	99741018	loop_2409
chr13	99851804	99851804	rs9557176	Chronic_inflammatory_diseases__ankylosing_spondylitis__Crohn_s_disease__psoriasis__primary_sclerosing_cholangitis__ulcerative_colitis___pleiotropy_EUR,Crohn_s_disease_EUR,Inflammatory_bowel_disease_EUR	1	1	1	0	1	EBNA2_loss_loop	chr13	99851606	99854658	loop_71
chr13	99852952	99852952	rs7331894	Psoriasis_EUR	1	1	1	0	0	EBNA2_loss_loop	chr13	99851606	99854658	loop_71
chr13	99853912	99853912	rs34924388	Eosinophil_counts_EUR,Eosinophil_percentage_of_granulocytes_EUR,Eosinophil_percentage_of_white_cells_EUR,Neutrophil_percentage_of_granulocytes_EUR,Sum_eosinophil_basophil_counts_EUR	0	0	1	0	0	EBNA2_loss_loop	chr13	99851606	99854658	loop_71
chr13	99932359	99932359	rs9585030	Chronic_inflammatory_diseases__ankylosing_spondylitis__Crohn_s_disease__psoriasis__primary_sclerosing_cholangitis__ulcerative_colitis___pleiotropy_EUR,Crohn_s_disease_EUR,Inflammatory_bowel_disease_EUR	1	1	1	0	1	EBNA2_loss_loop	chr13	99931179	99933393	loop_71
chr13	100018975	100018975	rs7998034	Chronic_inflammatory_diseases__ankylosing_spondylitis__Crohn_s_disease__psoriasis__primary_sclerosing_cholangitis__ulcerative_colitis___pleiotropy_EUR,Crohn_s_disease_EUR,Inflammatory_bowel_disease_EUR	1	1	1	0	1	EBNA2_allelic	chr13	100018974	100018975	rs7998034
chr13	100027957	100027957	rs8181880	Chronic_inflammatory_diseases__ankylosing_spondylitis__Crohn_s_disease__psoriasis__primary_sclerosing_cholangitis__ulcerative_colitis___pleiotropy_EUR,Crohn_s_disease_EUR,Inflammatory_bowel_disease_EUR	1	1	1	0	1	EBNA2_gain_loop	chr13	100026309	100029368	loop_2409
chr13	100027957	100027957	rs8181880	Chronic_inflammatory_diseases__ankylosing_spondylitis__Crohn_s_disease__psoriasis__primary_sclerosing_cholangitis__ulcerative_colitis___pleiotropy_EUR,Crohn_s_disease_EUR,Inflammatory_bowel_disease_EUR	1	1	1	0	1	EBNA2_allelic	chr13	100027956	100027957	rs8181880
chr13	111565064	111565064	rs11617995	Neuroticism_EUR,Worry_too_long_after_an_embarrassing_experience_EUR	0	0	0	0	0	EBNA2_gain_loop	chr13	111565047	111569585	loop_2411
chr13	111566098	111566098	rs7983431	Neuroticism_EUR,Worry_too_long_after_an_embarrassing_experience_EUR	0	0	0	0	0	EBNA2_gain_loop	chr13	111565047	111569585	loop_2411
chr13	111567385	111567385	rs4773274	Neuroticism_EUR,Worry_too_long_after_an_embarrassing_experience_EUR	0	0	0	0	0	EBNA2_gain_loop	chr13	111565047	111569585	loop_2411
chr13	111567506	111567506	rs117764654	Neuroticism_EUR,Worry_too_long_after_an_embarrassing_experience_EUR	0	0	0	0	0	EBNA2_gain_loop	chr13	111565047	111569585	loop_2411
chr13	111567695	111567695	rs7331674	Neuroticism_EUR,Worry_too_long_after_an_embarrassing_experience_EUR	0	0	0	0	0	EBNA2_gain_loop	chr13	111565047	111569585	loop_2411
chr13	115045259	115045259	rs9805813	Systolic_blood_pressure_AMR,Systolic_blood_pressure_EAS,Systolic_blood_pressure_EUR	0	0	0	0	0	EBNA2_gain_loop	chr13	115044678	115048732	loop_2413
chr13	115045575	115045575	chr13_115045575	Systolic_blood_pressure_EUR	0	0	0	0	0	EBNA2_gain_loop	chr13	115044678	115048732	loop_2413
chr13	115045729	115045729	rs9285061	Systolic_blood_pressure_AMR,Systolic_blood_pressure_EAS,Systolic_blood_pressure_EUR	0	0	0	0	0	EBNA2_gain_loop	chr13	115044678	115048732	loop_2413
chr13	115046896	115046896	rs7325270	Nodular_sclerosis_Hodgkin_lymphoma_EUR	0	0	0	0	0	EBNA2_gain_loop	chr13	115044678	115048732	loop_2413
chr13	115047001	115047001	rs12716663	Pulse_pressure_EAS	0	0	0	0	0	EBNA2_gain_loop	chr13	115044678	115048732	loop_2413
chr13	115047305	115047305	rs3752105	Systolic_blood_pressure_AMR,Systolic_blood_pressure_EAS,Systolic_blood_pressure_EUR	0	0	0	0	0	EBNA2_gain_loop	chr13	115044678	115048732	loop_2413
chr13	115047464	115047464	rs112035922	Systolic_blood_pressure_AMR,Systolic_blood_pressure_EAS,Systolic_blood_pressure_EUR	0	0	0	0	0	EBNA2_gain_loop	chr13	115044678	115048732	loop_2413
chr14	22902990	22902990	rs7142158	Atrial_fibrillation_EAS	0	0	0	0	0	EBNA2_gain_loop	chr14	22900584	22903521	loop_2419
chr14	22943705	22943705	rs77000164	Atrial_fibrillation_EAS	0	0	0	0	0	EBNA2_gain_loop	chr14	22941780	22945897	loop_2419
chr14	22943872	22943872	rs77793021	Atrial_fibrillation_EAS	0	0	0	0	0	EBNA2_gain_loop	chr14	22941780	22945897	loop_2419
chr14	22944295	22944295	rs76132819	Atrial_fibrillation_EAS	0	0	0	0	0	EBNA2_gain_loop	chr14	22941780	22945897	loop_2419
chr14	22944505	22944505	rs74323791	Atrial_fibrillation_EAS	0	0	0	0	0	EBNA2_gain_loop	chr14	22941780	22945897	loop_2419
chr14	22944578	22944578	rs78321095	Atrial_fibrillation_EAS	0	0	0	0	0	EBNA2_gain_loop	chr14	22941780	22945897	loop_2419
chr14	22944748	22944748	rs75595244	Atrial_fibrillation_EAS	0	0	0	0	0	EBNA2_gain_loop	chr14	22941780	22945897	loop_2419
chr14	22945192	22945192	rs7161733	Atrial_fibrillation_EAS	0	0	0	0	0	EBNA2_gain_loop	chr14	22941780	22945897	loop_2419
chr14	23002684	23002684	rs1154155	Narcolepsy_EAS	0	0	0	0	0	EBNA2_loss_loop	chr14	22998661	23002833	loop_74
chr14	23026212	23026212	chr14_23026212	Atrial_fibrillation_EAS	0	0	0	0	0	EBNA2_gain_loop	chr14	23023593	23027842	loop_2422
chr14	23030602	23030602	rs112581306	Atrial_fibrillation_EAS	0	0	0	0	0	EBNA2_gain_loop	chr14	23029320	23038809	loop_2423
chr14	23033608	23033608	rs5742874	Atrial_fibrillation_EAS	0	0	0	0	0	EBNA2_gain_loop	chr14	23029320	23038809	loop_2423
chr14	23038403	23038403	rs5742839	Atrial_fibrillation_EAS	0	0	0	0	0	EBNA2_gain_loop	chr14	23029320	23038809	loop_2423
chr14	23398153	23398153	rs2295685	Cognitive_ability__MTAG_EUR,Cognitive_performance__MTAG_EUR,Educational_attainment__MTAG_EUR,Educational_attainment__years_of_education_EUR,Highest_math_class_taken_EUR,Highest_math_class_taken__MTAG_EUR,Intelligence__MTAG_EUR,Lung_function__FEV1_FVC_EUR,Macular_thickness_EUR,Self_reported_math_ability_EUR,Self_reported_math_ability__MTAG_EUR	0	0	0	0	0	EBNA2_gain_loop	chr14	23397155	23399820	loop_2427
chr14	23398902	23398902	rs4982710	Cognitive_ability__MTAG_EUR,Cognitive_performance__MTAG_EUR,Educational_attainment__MTAG_EUR,Educational_attainment__years_of_education_EUR,Highest_math_class_taken_EUR,Highest_math_class_taken__MTAG_EUR,Intelligence__MTAG_EUR,Lung_function__FEV1_FVC_EUR,Macular_thickness_EUR,Self_reported_math_ability_EUR,Self_reported_math_ability__MTAG_EUR	0	0	0	0	0	EBNA2_gain_loop	chr14	23397155	23399820	loop_2427
chr14	23398990	23398990	rs4982711	Cognitive_ability__MTAG_EUR,Cognitive_performance__MTAG_EUR,Educational_attainment__MTAG_EUR,Educational_attainment__years_of_education_EUR,Highest_math_class_taken_EUR,Highest_math_class_taken__MTAG_EUR,Intelligence__MTAG_EUR,Self_reported_math_ability_EUR	0	0	0	0	0	EBNA2_gain_loop	chr14	23397155	23399820	loop_2427
chr14	23399096	23399096	rs368180956	Cognitive_ability__MTAG_EUR,Cognitive_performance__MTAG_EUR,Educational_attainment__MTAG_EUR,Educational_attainment__years_of_education_EUR,Highest_math_class_taken_EUR,Highest_math_class_taken__MTAG_EUR,Intelligence__MTAG_EUR,Lung_function__FEV1_FVC_EUR,Macular_thickness_EUR,Self_reported_math_ability_EUR,Self_reported_math_ability__MTAG_EUR	0	0	0	0	0	EBNA2_gain_loop	chr14	23397155	23399820	loop_2427
chr14	23399790	23399790	rs7145494	Cognitive_ability__MTAG_EUR,Cognitive_performance__MTAG_EUR,Educational_attainment__MTAG_EUR,Educational_attainment__years_of_education_EUR,Highest_math_class_taken_EUR,Highest_math_class_taken__MTAG_EUR,Intelligence__MTAG_EUR,Lung_function__FEV1_FVC_EUR,Macular_thickness_EUR,Self_reported_math_ability_EUR,Self_reported_math_ability__MTAG_EUR	0	0	0	0	0	EBNA2_gain_loop	chr14	23397155	23399820	loop_2427
chr14	23425041	23425041	rs712486	Cognitive_ability__MTAG_EUR,Cognitive_performance__MTAG_EUR,Educational_attainment__MTAG_EUR,Educational_attainment__years_of_education_EUR,Highest_math_class_taken_EUR,Highest_math_class_taken__MTAG_EUR,Intelligence__MTAG_EUR,Self_reported_math_ability_EUR	0	0	0	0	0	EBNA2_gain_loop	chr14	23424859	23427595	loop_2427
chr14	23426182	23426182	rs2273626	Intelligence__MTAG_EUR	0	0	0	0	0	EBNA2_gain_loop	chr14	23424859	23427595	loop_2427
chr14	23426422	23426422	rs12880925	Intelligence__MTAG_EUR	0	0	0	0	0	EBNA2_gain_loop	chr14	23424859	23427595	loop_2427
chr14	23564437	23564437	rs61745081	Atrial_fibrillation_EAS	0	0	0	0	0	EBNA2_loss_loop	chr14	23563089	23565668	loop_75
chr14	23565034	23565034	rs77459724	Atrial_fibrillation_EAS	0	0	0	0	0	EBNA2_loss_loop	chr14	23563089	23565668	loop_75
chr14	23754580	23754580	rs17256211	Pulse_pressure_EAS	0	0	0	0	0	EBNA2_gain_loop	chr14	23753139	23757362	loop_2430
chr14	23754580	23754580	rs17256211	Pulse_pressure_EAS	0	0	0	0	0	EBNA2_loss_loop	chr14	23753139	23757362	loop_75
chr14	24684048	24684048	rs1997996	Systolic_blood_pressure__cigarette_smoking_interaction_AFR,Systolic_blood_pressure__cigarette_smoking_interaction_EUR	0	0	0	0	0	EBNA2_gain_loop	chr14	24681655	24685783	loop_2436
chr14	35006214	35006214	rs8014739	Educational_attainment__MTAG_EUR,Educational_attainment__years_of_education_EUR	0	0	0	0	0	EBNA2_loss_loop	chr14	35006187	35010763	loop_79
chr14	35451103	35451103	rs34678475	Atopic_dermatitis_EAS,Bipolar_disorder_lithium_response__continuous__or_schizophrenia_EAS	0	0	1	1	0	EBNA2_loss_loop	chr14	35450161	35453945	loop_80
chr14	35451410	35451410	rs799488	Blood_protein_levels_EUR	0	0	0	0	0	EBNA2_loss_loop	chr14	35450161	35453945	loop_80
chr14	35451479	35451479	rs199809729	Atopic_dermatitis_EAS,Bipolar_disorder_lithium_response__continuous__or_schizophrenia_EAS	0	0	1	1	0	EBNA2_loss_loop	chr14	35450161	35453945	loop_80
chr14	35452132	35452132	rs12890307	Atopic_dermatitis_EAS,Bipolar_disorder_lithium_response__continuous__or_schizophrenia_EAS	0	0	1	1	0	EBNA2_loss_loop	chr14	35450161	35453945	loop_80
chr14	35452759	35452759	rs35797365	Atopic_dermatitis_EAS,Bipolar_disorder_lithium_response__continuous__or_schizophrenia_EAS	0	0	1	1	0	EBNA2_loss_loop	chr14	35450161	35453945	loop_80
chr14	35871093	35871093	rs696	Pulse_pressure_AFR,Systolic_blood_pressure_AFR,Pulse_pressure_AMR,Systolic_blood_pressure_AMR,Pulse_pressure_EAS,Systolic_blood_pressure_EAS,Lymphocyte_counts_EUR,Pulse_pressure_EUR,Systolic_blood_pressure_EUR	0	0	1	0	0	EBNA2_gain_loop	chr14	35871064	35875479	loop_2438
chr14	35871093	35871093	rs696	Pulse_pressure_AFR,Systolic_blood_pressure_AFR,Pulse_pressure_AMR,Systolic_blood_pressure_AMR,Pulse_pressure_EAS,Systolic_blood_pressure_EAS,Lymphocyte_counts_EUR,Pulse_pressure_EUR,Systolic_blood_pressure_EUR	0	0	1	0	0	EBNA2_loss_loop	chr14	35871064	35875479	loop_79
chr14	35871217	35871217	rs8904	Pulse_pressure_AFR,Systolic_blood_pressure_AFR,Pulse_pressure_AMR,Systolic_blood_pressure_AMR,Pulse_pressure_EAS,Systolic_blood_pressure_EAS,Lymphocyte_counts_EUR,Pulse_pressure_EUR,Systolic_blood_pressure_EUR	0	0	1	0	0	EBNA2_gain_loop	chr14	35871064	35875479	loop_2438
chr14	35871217	35871217	rs8904	Pulse_pressure_AFR,Systolic_blood_pressure_AFR,Pulse_pressure_AMR,Systolic_blood_pressure_AMR,Pulse_pressure_EAS,Systolic_blood_pressure_EAS,Lymphocyte_counts_EUR,Pulse_pressure_EUR,Systolic_blood_pressure_EUR	0	0	1	0	0	EBNA2_loss_loop	chr14	35871064	35875479	loop_79
chr14	35881679	35881679	rs8015243	Eosinophil_percentage_of_granulocytes_EUR,Eosinophil_percentage_of_white_cells_EUR,Neutrophil_percentage_of_granulocytes_EUR	0	0	1	0	0	EBNA2_gain_loop	chr14	35881663	35883028	loop_2438
chr14	35881761	35881761	rs9322952	Eosinophil_percentage_of_granulocytes_EUR,Eosinophil_percentage_of_white_cells_EUR,Neutrophil_percentage_of_granulocytes_EUR	0	0	1	0	0	EBNA2_gain_loop	chr14	35881663	35883028	loop_2438
chr14	35881966	35881966	rs34332679	Eosinophil_counts_EUR,Eosinophil_percentage_of_granulocytes_EUR,Eosinophil_percentage_of_white_cells_EUR,Neutrophil_percentage_of_granulocytes_EUR,Sum_eosinophil_basophil_counts_EUR	0	0	1	0	0	EBNA2_gain_loop	chr14	35881663	35883028	loop_2438
chr14	35882492	35882492	rs8020739	Eosinophil_counts_EUR,Eosinophil_percentage_of_granulocytes_EUR,Eosinophil_percentage_of_white_cells_EUR,Neutrophil_percentage_of_granulocytes_EUR,Sum_eosinophil_basophil_counts_EUR	0	0	1	0	0	EBNA2_gain_loop	chr14	35881663	35883028	loop_2438
chr14	35882935	35882935	rs2007960	Eosinophil_percentage_of_granulocytes_EUR,Eosinophil_percentage_of_white_cells_EUR,Neutrophil_percentage_of_granulocytes_EUR	0	0	1	0	0	EBNA2_gain_loop	chr14	35881663	35883028	loop_2438
chr14	50064377	50064377	rs71115382	Blood_protein_levels_EUR	0	0	0	0	0	EBNA2_gain_loop	chr14	50064012	50067080	loop_2441
chr14	50064962	50064962	rs28643334	Blood_protein_levels_EUR	0	0	0	0	0	EBNA2_gain_loop	chr14	50064012	50067080	loop_2441
chr14	50066343	50066343	rs144202004	Blood_protein_levels_EUR	0	0	0	0	0	EBNA2_gain_loop	chr14	50064012	50067080	loop_2441
chr14	50066582	50066582	rs112304494	Blood_protein_levels_EUR	0	0	0	0	0	EBNA2_gain_loop	chr14	50064012	50067080	loop_2441
chr14	50066796	50066796	rs28405032	Blood_protein_levels_EUR	0	0	0	0	0	EBNA2_gain_loop	chr14	50064012	50067080	loop_2441
chr14	50087753	50087753	rs7519	Blood_protein_levels_EUR	0	0	0	0	0	EBNA2_gain_loop	chr14	50085695	50088978	loop_2441
chr14	50358782	50358782	chr14_50358782	Pulse_pressure_EAS	0	0	0	0	0	EBNA2_gain_loop	chr14	50358043	50361217	loop_2449
chr14	55569578	55569578	rs76790102	Blood_protein_levels_EUR,Mean_platelet_volume_EUR	0	0	0	0	0	EBNA2_gain_loop	chr14	55568540	55571856	loop_2456
chr14	65568215	65568215	rs2781373	Sleep_duration_EUR	0	0	0	0	0	EBNA2_gain_loop	chr14	65568185	65570120	loop_2470
chr14	65568563	65568563	rs2781374	Sleep_duration_EUR	0	0	0	0	0	EBNA2_gain_loop	chr14	65568185	65570120	loop_2470
chr14	65772439	65772439	chr14_65772439	Blood_protein_levels_EUR,Plateletcrit_EUR	0	0	0	0	0	EBNA2_gain_loop	chr14	65768675	65773141	loop_2470
chr14	65811400	65811400	rs4899174	N_glycan_levels_EUR	0	0	0	0	0	EBNA2_gain_loop	chr14	65811293	65812808	loop_2472
chr14	65811418	65811418	rs144508295	N_glycan_levels_EUR	0	0	0	0	0	EBNA2_gain_loop	chr14	65811293	65812808	loop_2472
chr14	65811537	65811537	rs8014475	N_glycan_levels_EUR	0	0	0	0	0	EBNA2_gain_loop	chr14	65811293	65812808	loop_2472
chr14	68717917	68717917	chr14_68717917	Breast_cancer_EUR	0	0	0	0	0	EBNA2_gain_loop	chr14	68717857	68719573	loop_2476
chr14	68719114	68719114	rs34409637	Breast_cancer_EUR	0	0	0	0	0	EBNA2_gain_loop	chr14	68717857	68719573	loop_2476
chr14	69259406	69259406	rs11847049	Celiac_disease_EUR,Celiac_disease_SAS	1	0	1	0	0	EBNA2_gain_loop	chr14	69258400	69264602	loop_2476
chr14	69259502	69259502	rs11851414	Celiac_disease_EUR,Celiac_disease_SAS	1	0	1	0	0	EBNA2_gain_loop	chr14	69258400	69264602	loop_2476
chr14	69259533	69259533	chr14_69259533	Celiac_disease_EUR,Celiac_disease_SAS	1	0	1	0	0	EBNA2_gain_loop	chr14	69258400	69264602	loop_2476
chr14	69259662	69259662	rs1051533	Celiac_disease_EUR,Celiac_disease_SAS	1	0	1	0	0	EBNA2_gain_loop	chr14	69258400	69264602	loop_2476
chr14	69260028	69260028	rs57786342	Diastolic_blood_pressure_EUR	0	0	0	0	0	EBNA2_gain_loop	chr14	69258400	69264602	loop_2476
chr14	69260371	69260371	rs72731554	Blond_vs__brown_black_hair_color_EUR,Celiac_disease_EUR,Diastolic_blood_pressure_EUR	1	0	1	0	0	EBNA2_gain_loop	chr14	69258400	69264602	loop_2476
chr14	69260563	69260563	rs12889006	Juvenile_idiopathic_arthritis__oligoarticular_or_rheumatoid_factor_negative_polyarticular_EUR,Multiple_sclerosis_EUR,Juvenile_idiopathic_arthritis_CAGE_curated	1	0	1	0	0	EBNA2_gain_loop	chr14	69258400	69264602	loop_2476
chr14	69260588	69260588	rs3825568	Juvenile_idiopathic_arthritis__oligoarticular_or_rheumatoid_factor_negative_polyarticular_EUR,Multiple_sclerosis_EUR,Juvenile_idiopathic_arthritis_CAGE_curated	1	0	1	0	0	EBNA2_gain_loop	chr14	69258400	69264602	loop_2476
chr14	69261162	69261162	rs2236263	Type_1_diabetes_EUR	1	0	1	0	0	EBNA2_gain_loop	chr14	69258400	69264602	loop_2476
chr14	69261472	69261472	rs2236262	Juvenile_idiopathic_arthritis__oligoarticular_or_rheumatoid_factor_negative_polyarticular_EUR,Multiple_sclerosis_EUR,Juvenile_idiopathic_arthritis_CAGE_curated	1	0	1	0	0	EBNA2_gain_loop	chr14	69258400	69264602	loop_2476
chr14	69262441	69262441	rs3742887	Type_1_diabetes_EUR	1	0	1	0	0	EBNA2_gain_loop	chr14	69258400	69264602	loop_2476
chr14	69263074	69263074	rs6573857	Inflammatory_bowel_disease_EUR,Type_1_diabetes_EUR	1	0	1	0	1	EBNA2_gain_loop	chr14	69258400	69264602	loop_2476
chr14	69263341	69263341	rs8011558	Fibrinogen_levels_EUR,Inflammatory_bowel_disease_EUR,Type_1_diabetes_EUR	1	0	1	0	1	EBNA2_gain_loop	chr14	69258400	69264602	loop_2476
chr14	69263599	69263599	rs1465788	Inflammatory_bowel_disease_EUR,Type_1_diabetes_EUR	1	0	1	0	1	EBNA2_gain_loop	chr14	69258400	69264602	loop_2476
chr14	69264564	69264564	rs34160920	Type_1_diabetes_EUR	1	0	1	0	0	EBNA2_gain_loop	chr14	69258400	69264602	loop_2476
chr14	69279974	69279974	rs141950310	Multiple_sclerosis_EUR,Urinary_albumin_excretion_EUR	1	0	1	0	0	EBNA2_gain_loop	chr14	69279558	69284457	loop_2480
chr14	69280049	69280049	rs7156516	Fibrinogen_levels_EUR,Inflammatory_bowel_disease_EUR,Type_1_diabetes_EUR	1	0	1	0	1	EBNA2_gain_loop	chr14	69279558	69284457	loop_2480
chr14	69280309	69280309	rs4902652	Celiac_disease_SAS	1	0	1	0	0	EBNA2_gain_loop	chr14	69279558	69284457	loop_2480
chr14	69281878	69281878	rs194747	Multiple_sclerosis_EUR,Urinary_albumin_excretion_EUR	1	0	1	0	0	EBNA2_gain_loop	chr14	69279558	69284457	loop_2480
chr14	69282331	69282331	rs402224	Multiple_sclerosis_EUR,Urinary_albumin_excretion_EUR	1	0	1	0	0	EBNA2_gain_loop	chr14	69279558	69284457	loop_2480
chr14	69282333	69282333	rs402223	Fibrinogen_levels_EUR,Inflammatory_bowel_disease_EUR	0	0	1	0	1	EBNA2_gain_loop	chr14	69279558	69284457	loop_2480
chr14	69282711	69282711	rs168962	Fibrinogen_levels_EUR,Inflammatory_bowel_disease_EUR,Type_1_diabetes_EUR	1	0	1	0	1	EBNA2_gain_loop	chr14	69279558	69284457	loop_2480
chr14	69282887	69282887	rs194746	Multiple_sclerosis_EUR,Urinary_albumin_excretion_EUR	1	0	1	0	0	EBNA2_gain_loop	chr14	69279558	69284457	loop_2480
chr14	69282930	69282930	rs168961	Multiple_sclerosis_EUR,Urinary_albumin_excretion_EUR	1	0	1	0	0	EBNA2_gain_loop	chr14	69279558	69284457	loop_2480
chr14	69283375	69283375	rs4899261	Celiac_disease_SAS	1	0	1	0	0	EBNA2_gain_loop	chr14	69279558	69284457	loop_2480
chr14	69283545	69283545	rs4899262	Celiac_disease_SAS	1	0	1	0	0	EBNA2_gain_loop	chr14	69279558	69284457	loop_2480
chr14	69907537	69907537	rs138914958	Normal_facial_asymmetry__angle_of_surface_orientation_score_EUR	0	0	0	0	0	EBNA2_gain_loop	chr14	69906559	69910361	loop_2483
chr14	69907587	69907587	chr14_69907587	Normal_facial_asymmetry__angle_of_surface_orientation_score_EUR	0	0	0	0	0	EBNA2_gain_loop	chr14	69906559	69910361	loop_2483
chr14	72044547	72044547	rs2332640	QRS_duration_AFR,Mitral_valve_prolapse_EUR,PR_interval_EUR,QRS_duration_EUR	0	0	0	0	0	EBNA2_open_Chromatin	chr14	72044279	72044888	314
chr14	72044728	72044728	rs2332641	Mitral_valve_prolapse_EUR,PR_interval_EUR,QRS_duration_EUR	0	0	0	0	0	EBNA2_open_Chromatin	chr14	72044279	72044888	314
chr14	74318136	74318136	rs72627109	Blood_protein_levels_EUR	0	0	0	0	0	EBNA2_gain_loop	chr14	74317260	74320088	loop_2487
chr14	74319904	74319904	rs74521291	Blood_protein_levels_EUR	0	0	0	0	0	EBNA2_gain_loop	chr14	74317260	74320088	loop_2487
chr14	74353020	74353020	rs17093546	Blood_protein_levels_EUR	0	0	0	0	0	EBNA2_gain_loop	chr14	74352512	74354900	loop_2487
chr14	75981856	75981856	rs175714	Lymphocyte_counts_EUR	0	0	1	0	0	EBNA2_gain_loop	chr14	75981247	75982831	loop_2489
chr14	81397477	81397477	rs77198875	Mild_influenza__H1N1__infection_EUR	0	0	1	0	0	EBNA2_open_Chromatin	chr14	81397130	81397998	423
chr14	88472846	88472846	rs78461372	Multiple_sclerosis_EUR	1	0	1	0	0	EBNA2_open_Chromatin	chr14	88472633	88472938	205
chr14	92506583	92506583	rs58339937	Height_EAS	0	0	0	0	0	EBNA2_gain_loop	chr14	92505113	92507998	loop_2505
chr14	92587301	92587301	rs61976561	Spherical_equivalent_or_myopia__age_of_diagnosis_EAS,Myopia_EUR,Spherical_equivalent_or_myopia__age_of_diagnosis_EUR	0	0	0	0	0	EBNA2_gain_loop	chr14	92587289	92589980	loop_2506
chr14	92588192	92588192	rs12886909	Myopia_EUR,Spherical_equivalent_or_myopia__age_of_diagnosis_EUR	0	0	0	0	0	EBNA2_gain_loop	chr14	92587289	92589980	loop_2506
chr14	92588688	92588688	rs12886834	Myopia_EUR,Spherical_equivalent_or_myopia__age_of_diagnosis_EUR	0	0	0	0	0	EBNA2_gain_loop	chr14	92587289	92589980	loop_2506
chr14	100131282	100131282	rs12432679	Coronary_heart_disease_EUR,Systolic_blood_pressure_EUR	0	0	0	0	0	EBNA2_open_Chromatin	chr14	100131192	100131578	190
chr14	100839128	100839128	rs941929	Blood_protein_levels_EUR	0	0	0	0	0	EBNA2_loss_loop	chr14	100838388	100843699	loop_84
chr14	100839261	100839261	rs3783347	Mean_arterial_pressure_EAS,Systolic_blood_pressure_EAS	0	0	0	0	0	EBNA2_loss_loop	chr14	100838388	100843699	loop_84
chr14	100840290	100840290	rs3994912	Blood_protein_levels_EUR	0	0	0	0	0	EBNA2_loss_loop	chr14	100838388	100843699	loop_84
chr14	100840596	100840596	rs941928	Mean_arterial_pressure_EAS,Systolic_blood_pressure_EAS,Blood_protein_levels_EUR	0	0	0	0	0	EBNA2_loss_loop	chr14	100838388	100843699	loop_84
chr14	100840813	100840813	rs941927	Blood_protein_levels_EUR	0	0	0	0	0	EBNA2_loss_loop	chr14	100838388	100843699	loop_84
chr14	100840950	100840950	rs941926	Blood_protein_levels_EUR	0	0	0	0	0	EBNA2_loss_loop	chr14	100838388	100843699	loop_84
chr14	100841008	100841008	rs1957453	Blood_protein_levels_EUR	0	0	0	0	0	EBNA2_loss_loop	chr14	100838388	100843699	loop_84
chr14	100841166	100841166	rs3835003	Blood_protein_levels_EUR	0	0	0	0	0	EBNA2_loss_loop	chr14	100838388	100843699	loop_84
chr14	100841700	100841700	rs7143006	Mean_arterial_pressure_EAS,Systolic_blood_pressure_EAS	0	0	0	0	0	EBNA2_loss_loop	chr14	100838388	100843699	loop_84
chr14	100842059	100842059	rs2234518	Blood_protein_levels_EUR	0	0	0	0	0	EBNA2_loss_loop	chr14	100838388	100843699	loop_84
chr14	100842377	100842377	rs17554326	Mean_arterial_pressure_EAS,Systolic_blood_pressure_EAS	0	0	0	0	0	EBNA2_loss_loop	chr14	100838388	100843699	loop_84
chr14	100842637	100842637	rs2273804	Blood_protein_levels_EUR	0	0	0	0	0	EBNA2_loss_loop	chr14	100838388	100843699	loop_84
chr14	100843343	100843343	rs12891492	Mean_arterial_pressure_EAS,Systolic_blood_pressure_EAS	0	0	0	0	0	EBNA2_loss_loop	chr14	100838388	100843699	loop_84
chr14	103056926	103056926	rs1815262	Platelet_count_EAS	0	0	0	0	0	EBNA2_gain_loop	chr14	103056782	103060464	loop_2528
chr14	103057250	103057250	rs749543	Platelet_count_EAS	0	0	0	0	0	EBNA2_gain_loop	chr14	103056782	103060464	loop_2528
chr14	103057511	103057511	rs4906229	Platelet_count_EAS	0	0	0	0	0	EBNA2_gain_loop	chr14	103056782	103060464	loop_2528
chr14	103058023	103058023	rs10132160	Platelet_count_EAS	0	0	0	0	0	EBNA2_gain_loop	chr14	103056782	103060464	loop_2528
chr14	103058608	103058608	rs8009475	Platelet_count_EAS	0	0	0	0	0	EBNA2_gain_loop	chr14	103056782	103060464	loop_2528
chr14	103058769	103058769	rs35258120	Platelet_count_EAS	0	0	0	0	0	EBNA2_gain_loop	chr14	103056782	103060464	loop_2528
chr14	103059220	103059220	rs1057881	Platelet_count_EAS,Mean_platelet_volume_EUR	0	0	0	0	0	EBNA2_gain_loop	chr14	103056782	103060464	loop_2528
chr14	103077649	103077649	rs4906237	Platelet_count_EAS,Mean_platelet_volume_EUR,Platelet_count_EUR,Plateletcrit_EUR	0	0	0	0	0	EBNA2_gain_loop	chr14	103077643	103079832	loop_2528
chr14	103077702	103077702	rs4906238	Platelet_count_EAS,Mean_platelet_volume_EUR,Platelet_count_EUR,Plateletcrit_EUR	0	0	0	0	0	EBNA2_gain_loop	chr14	103077643	103079832	loop_2528
chr14	103078073	103078073	rs4906239	Platelet_count_EAS,Mean_platelet_volume_EUR,Platelet_count_EUR,Plateletcrit_EUR	0	0	0	0	0	EBNA2_gain_loop	chr14	103077643	103079832	loop_2528
chr14	103079725	103079725	rs10782496	Platelet_count_EAS,Mean_platelet_volume_EUR,Platelet_count_EUR,Plateletcrit_EUR	0	0	0	0	0	EBNA2_gain_loop	chr14	103077643	103079832	loop_2528
chr14	105198749	105198749	rs34022232	Breast_cancer_EUR	0	0	0	0	0	EBNA2_gain_loop	chr14	105198225	105200058	loop_2530
chr14	105198822	105198822	rs34802997	Breast_cancer_EUR	0	0	0	0	0	EBNA2_gain_loop	chr14	105198225	105200058	loop_2530
chr14	105714751	105714751	rs2735818	Platelet_count_EAS,Mean_platelet_volume_EUR,Platelet_count_EUR,Platelet_distribution_width_EUR	0	0	0	0	0	EBNA2_down_genes	chr14	105714378	105715378	BTBD6
chr14	105715327	105715327	rs2816604	Platelet_count_EAS,Mean_platelet_volume_EUR,Platelet_count_EUR,Platelet_distribution_width_EUR	0	0	0	0	0	EBNA2_down_genes	chr14	105714378	105715378	BTBD6
chr14	106051498	106051498	rs55644148	Blood_protein_levels_EUR	0	0	0	0	0	EBNA2_gain_loop	chr14	106046554	106053020	loop_2531
chr14	106051501	106051501	rs55701312	Blood_protein_levels_EUR	0	0	0	0	0	EBNA2_gain_loop	chr14	106046554	106053020	loop_2531
chr14	106830328	106830328	rs78314889	HDL_cholesterol_EUR	0	0	0	0	0	EBNA2_gain_loop	chr14	106829927	106834820	loop_2538
chr14	106834645	106834645	rs73377149	HDL_cholesterol_EUR	0	0	0	0	0	EBNA2_gain_loop	chr14	106829927	106834820	loop_2538
chr14	107151508	107151508	rs10130834	Blood_protein_levels_EUR	0	0	0	0	0	EBNA2_gain_loop	chr14	107150632	107157716	loop_2540
chr14	107152027	107152027	rs4774175	Blood_protein_levels_EUR	0	0	0	0	0	EBNA2_gain_loop	chr14	107150632	107157716	loop_2540
chr14	107152328	107152328	rs34821310	Blood_protein_levels_EUR	0	0	0	0	0	EBNA2_gain_loop	chr14	107150632	107157716	loop_2540
chr14	107153577	107153577	rs8018138	Blood_protein_levels_EUR	0	0	0	0	0	EBNA2_gain_loop	chr14	107150632	107157716	loop_2540
chr14	107154065	107154065	rs10138161	Blood_protein_levels_EUR	0	0	0	0	0	EBNA2_gain_loop	chr14	107150632	107157716	loop_2540
chr14	107154698	107154698	rs2078688	Blood_protein_levels_EUR	0	0	0	0	0	EBNA2_gain_loop	chr14	107150632	107157716	loop_2540
chr14	107155802	107155802	rs28854542	Blood_protein_levels_EUR	0	0	0	0	0	EBNA2_gain_loop	chr14	107150632	107157716	loop_2540
chr14	107157003	107157003	rs6576205	Blood_protein_levels_EUR	0	0	0	0	0	EBNA2_gain_loop	chr14	107150632	107157716	loop_2540
chr14	107157005	107157005	rs6576206	Blood_protein_levels_EUR	0	0	0	0	0	EBNA2_gain_loop	chr14	107150632	107157716	loop_2540
chr14	107163122	107163122	rs10150118	Blood_protein_levels_EUR	0	0	0	0	0	EBNA2_gain_loop	chr14	107162718	107164888	loop_2541
chr14	107163130	107163130	rs10139387	Blood_protein_levels_EUR	0	0	0	0	0	EBNA2_gain_loop	chr14	107162718	107164888	loop_2541
chr14	107163289	107163289	rs2105987	Blood_protein_levels_EUR	0	0	0	0	0	EBNA2_gain_loop	chr14	107162718	107164888	loop_2541
chr15	31725775	31725775	rs7403010	Waist_to_hip_ratio_adjusted_for_BMI__adjusted_for_smoking_behaviour_AFR,Waist_to_hip_ratio_adjusted_for_body_mass_index_AFR	0	0	0	0	0	EBNA2_gain_loop	chr15	31725750	31729626	loop_2549
chr15	34659517	34659517	rs117799466	Educational_attainment__MTAG_EUR,Educational_attainment__years_of_education_EUR	0	0	0	0	0	EBNA2_gain_loop	chr15	34659099	34661424	loop_2557
chr15	38856961	38856961	rs55728265	Chronic_inflammatory_diseases__ankylosing_spondylitis__Crohn_s_disease__psoriasis__primary_sclerosing_cholangitis__ulcerative_colitis___pleiotropy_EUR,Crohn_s_disease_EUR,Type_1_diabetes_EUR	1	1	1	0	1	EBNA2_up_genes	chr15	38856506	38857506	RASGRP1
chr15	38925195	38925195	rs72729322	Chronic_inflammatory_diseases__ankylosing_spondylitis__Crohn_s_disease__psoriasis__primary_sclerosing_cholangitis__ulcerative_colitis___pleiotropy_EUR,Educational_attainment__MTAG_EUR	1	1	1	0	1	EBNA2_gain_loop	chr15	38923246	38925434	loop_2558
chr15	40347435	40347435	rs28736699	Ewing_sarcoma_EUR	0	0	0	0	0	EBNA2_gain_loop	chr15	40345830	40348573	loop_2559
chr15	44079477	44079477	rs11070412	Diastolic_blood_pressure_AMR,Diastolic_blood_pressure_EAS,Diastolic_blood_pressure_EUR,Self_reported_math_ability__MTAG_EUR	0	0	0	0	0	EBNA2_gain_loop	chr15	44079434	44085916	loop_2564
chr15	44080000	44080000	rs189683517	Lipoprotein_phospholipase_A2_activity_in_cardiovascular_disease_AFR	0	0	0	0	0	EBNA2_gain_loop	chr15	44079434	44085916	loop_2564
chr15	44080575	44080575	rs12899922	Diastolic_blood_pressure_AMR,Diastolic_blood_pressure_EUR,Self_reported_math_ability__MTAG_EUR	0	0	0	0	0	EBNA2_gain_loop	chr15	44079434	44085916	loop_2564
chr15	44080737	44080737	rs62018952	Diastolic_blood_pressure_AMR,Diastolic_blood_pressure_EUR,Self_reported_math_ability__MTAG_EUR	0	0	0	0	0	EBNA2_gain_loop	chr15	44079434	44085916	loop_2564
chr15	44082430	44082430	rs4923965	Blood_protein_levels_EUR	0	0	0	0	0	EBNA2_gain_loop	chr15	44079434	44085916	loop_2564
chr15	44084282	44084282	rs6493090	Blood_protein_levels_EUR	0	0	0	0	0	EBNA2_gain_loop	chr15	44079434	44085916	loop_2564
chr15	44084705	44084705	rs4644832	Blood_protein_levels_EUR	0	0	0	0	0	EBNA2_gain_loop	chr15	44079434	44085916	loop_2564
chr15	44090854	44090854	rs654276	Blood_protein_levels_EUR	0	0	0	0	0	EBNA2_gain_loop	chr15	44089826	44093501	loop_2565
chr15	44100282	44100282	rs35822148	Blood_protein_levels_EUR	0	0	0	0	0	EBNA2_gain_loop	chr15	44099020	44103388	loop_2565
chr15	44102328	44102328	rs693919	Diastolic_blood_pressure_AMR,Diastolic_blood_pressure_EUR,Self_reported_math_ability__MTAG_EUR	0	0	0	0	0	EBNA2_gain_loop	chr15	44099020	44103388	loop_2565
chr15	44102842	44102842	chr15_44102842	Serum_albumin_level_EAS	0	0	0	0	0	EBNA2_gain_loop	chr15	44099020	44103388	loop_2565
chr15	45322055	45322055	rs190189237	Lipoprotein_phospholipase_A2_activity_in_cardiovascular_disease_AFR	0	0	0	0	0	EBNA2_gain_loop	chr15	45321636	45323193	loop_2569
chr15	50474766	50474766	rs1648348	Blood_metabolite_ratios_EUR	0	0	0	0	0	EBNA2_down_genes	chr15	50473892	50474892	SLC27A2
chr15	51914662	51914662	rs2278990	Body_mass_index_AFR,Body_mass_index_AMR,Body_mass_index_EUR	0	0	0	0	0	EBNA2_up_genes	chr15	51914466	51915466	DMXL2
chr15	51914716	51914716	rs2278989	Body_mass_index_AFR,Body_mass_index_AMR,Body_mass_index_EUR	0	0	0	0	0	EBNA2_up_genes	chr15	51914466	51915466	DMXL2
chr15	51914778	51914778	rs6493514	Blood_protein_levels_EUR,Cognitive_performance__MTAG_EUR,Educational_attainment__MTAG_EUR,Intelligence__MTAG_EUR	0	0	0	0	0	EBNA2_up_genes	chr15	51914466	51915466	DMXL2
chr15	51915234	51915234	rs2278988	Body_mass_index_AFR,Body_mass_index_AMR,Body_mass_index_EUR	0	0	0	0	0	EBNA2_up_genes	chr15	51914466	51915466	DMXL2
chr15	57592557	57592557	rs139663751	Educational_attainment__MTAG_EUR	0	0	0	0	0	EBNA2_up_genes	chr15	57592062	57593062	LINC00926
chr15	60689995	60689995	rs12904906	Blood_protein_levels_EUR	0	0	0	0	0	EBNA2_up_genes	chr15	60689684	60690684	ANXA2
chr15	64672002	64672002	rs2062250	Granulocyte_count_EUR,Neutrophil_count_EUR,Sum_basophil_neutrophil_counts_EUR,Sum_neutrophil_eosinophil_counts_EUR,White_blood_cell_count_EUR	0	0	1	0	0	EBNA2_gain_loop	chr15	64671591	64674603	loop_2586
chr15	64672153	64672153	rs66529552	Monocyte_count_EUR,Myeloid_white_cell_count_EUR	0	0	1	0	0	EBNA2_gain_loop	chr15	64671591	64674603	loop_2586
chr15	64672159	64672159	rs2062249	Monocyte_count_EUR,Myeloid_white_cell_count_EUR	0	0	1	0	0	EBNA2_gain_loop	chr15	64671591	64674603	loop_2586
chr15	64672319	64672319	rs2062248	Monocyte_count_EUR,Myeloid_white_cell_count_EUR	0	0	1	0	0	EBNA2_gain_loop	chr15	64671591	64674603	loop_2586
chr15	64672593	64672593	rs4777185	Monocyte_count_EUR,Myeloid_white_cell_count_EUR	0	0	1	0	0	EBNA2_gain_loop	chr15	64671591	64674603	loop_2586
chr15	66124167	66124167	rs2727092	Body_mass_index_AFR	0	0	0	0	0	EBNA2_gain_loop	chr15	66123665	66126981	loop_2591
chr15	66124227	66124227	rs2727091	Body_mass_index_AFR	0	0	0	0	0	EBNA2_gain_loop	chr15	66123665	66126981	loop_2591
chr15	66994830	66994830	rs62005619	Fat_free_mass_EUR	0	0	0	0	0	EBNA2_down_genes	chr15	66994173	66995173	SMAD6
chr15	67442596	67442596	rs17293632	Coronary_artery_disease_AMR,Coronary_artery_disease_EAS,Allergic_disease__asthma__hay_fever_or_eczema_EUR,Asthma_EUR,Asthma__adult_onset_EUR,Asthma__childhood_onset_EUR,Asthma__moderate_or_severe_EUR,Asthma_onset__childhood_vs_adult_EUR,Asthma_or_allergic_disease__pleiotropy_EUR,Chronic_inflammatory_diseases__ankylosing_spondylitis__Crohn_s_disease__psoriasis__primary_sclerosing_cholangitis__ulce…	1	1	1	1	1	EBNA2_allelic	chr15	67442595	67442596	rs17293632
chr15	68074084	68074084	rs4261478	BMI__adjusted_for_smoking_behaviour_AFR,BMI_in_non_smokers_AFR,Body_mass_index__joint_analysis_main_effects_and_smoking_interaction_AFR,Body_mass_index_in_physically_active_individuals_AFR,Restless_legs_syndrome_EUR	0	0	0	0	0	EBNA2_loss_loop	chr15	68073492	68079375	loop_86
chr15	68076399	68076399	rs8025790	BMI__adjusted_for_smoking_behaviour_AFR,BMI_in_non_smokers_AFR,Body_mass_index__joint_analysis_main_effects_and_physical_activity_interaction_AFR,Body_mass_index__joint_analysis_main_effects_and_smoking_interaction_AFR,Body_mass_index_in_physically_active_individuals_AFR,BMI__adjusted_for_smoking_behaviour_AMR,BMI_in_non_smokers_AMR,Body_mass_index__joint_analysis_main_effects_and_smoking_interac…	0	0	0	0	0	EBNA2_loss_loop	chr15	68073492	68079375	loop_86
chr15	68076856	68076856	rs8030456	BMI__adjusted_for_smoking_behaviour_AFR,BMI_in_non_smokers_AFR,Body_mass_index__joint_analysis_main_effects_and_physical_activity_interaction_AFR,Body_mass_index__joint_analysis_main_effects_and_smoking_interaction_AFR,Body_mass_index_in_physically_active_individuals_AFR,BMI__adjusted_for_smoking_behaviour_AMR,BMI_in_non_smokers_AMR,Body_mass_index__joint_analysis_main_effects_and_smoking_interac…	0	0	0	0	0	EBNA2_loss_loop	chr15	68073492	68079375	loop_86
chr15	68077168	68077168	rs16951275	BMI__adjusted_for_smoking_behaviour_AFR,BMI_in_non_smokers_AFR,Body_mass_index__joint_analysis_main_effects_and_physical_activity_interaction_AFR,Body_mass_index__joint_analysis_main_effects_and_smoking_interaction_AFR,Body_mass_index_in_physically_active_individuals_AFR,BMI__adjusted_for_smoking_behaviour_AMR,BMI_in_non_smokers_AMR,Body_mass_index__joint_analysis_main_effects_and_smoking_interac…	0	0	0	0	0	EBNA2_loss_loop	chr15	68073492	68079375	loop_86
chr15	68077630	68077630	rs7175517	BMI__adjusted_for_smoking_behaviour_AFR,BMI_in_non_smokers_AFR,Body_mass_index__joint_analysis_main_effects_and_physical_activity_interaction_AFR,Body_mass_index__joint_analysis_main_effects_and_smoking_interaction_AFR,Body_mass_index_in_physically_active_individuals_AFR,BMI__adjusted_for_smoking_behaviour_AMR,BMI_in_non_smokers_AMR,Body_mass_index__joint_analysis_main_effects_and_smoking_interac…	0	0	0	0	0	EBNA2_loss_loop	chr15	68073492	68079375	loop_86
chr15	68078177	68078177	rs11374166	BMI__adjusted_for_smoking_behaviour_AFR,BMI_in_non_smokers_AFR,Body_mass_index__joint_analysis_main_effects_and_physical_activity_interaction_AFR,Body_mass_index__joint_analysis_main_effects_and_smoking_interaction_AFR,Body_mass_index_in_physically_active_individuals_AFR,BMI__adjusted_for_smoking_behaviour_AMR,BMI_in_non_smokers_AMR,Body_mass_index__joint_analysis_main_effects_and_smoking_interac…	0	0	0	0	0	EBNA2_loss_loop	chr15	68073492	68079375	loop_86
chr15	68078769	68078769	rs28463100	BMI__adjusted_for_smoking_behaviour_AFR,BMI_in_non_smokers_AFR,Body_mass_index__joint_analysis_main_effects_and_physical_activity_interaction_AFR,Body_mass_index__joint_analysis_main_effects_and_smoking_interaction_AFR,Body_mass_index_in_physically_active_individuals_AFR,BMI__adjusted_for_smoking_behaviour_AMR,BMI_in_non_smokers_AMR,Body_mass_index__joint_analysis_main_effects_and_smoking_interac…	0	0	0	0	0	EBNA2_loss_loop	chr15	68073492	68079375	loop_86
chr15	68480887	68480887	rs1049493	Diastolic_blood_pressure_EUR	0	0	0	0	0	EBNA2_gain_loop	chr15	68479987	68484190	loop_2598
chr15	68481582	68481582	rs12912276	Diastolic_blood_pressure_EUR	0	0	0	0	0	EBNA2_gain_loop	chr15	68479987	68484190	loop_2598
chr15	75080150	75080150	rs1378941	Diastolic_blood_pressure__cigarette_smoking_interaction_AFR,Systolic_blood_pressure_AFR,Systolic_blood_pressure__cigarette_smoking_interaction_AFR,Diastolic_blood_pressure__cigarette_smoking_interaction_AMR,Systolic_blood_pressure_AMR,Systolic_blood_pressure__cigarette_smoking_interaction_AMR,Diastolic_blood_pressure__cigarette_smoking_interaction_EAS,Systolic_blood_pressure_EAS,Systolic_blood_pr…	0	0	0	0	0	EBNA2_gain_loop	chr15	75078429	75083847	loop_2608
chr15	75080685	75080685	rs8033381	Diastolic_blood_pressure_x_alcohol_consumption__light_vs_heavy__interaction__2df_test_AFR,Mean_arterial_pressure_x_alcohol_consumption__light_vs_heavy__interaction__2df_test_AFR,Systolic_blood_pressure_x_alcohol_consumption__light_vs_heavy__interaction__2df_test_AFR,Diastolic_blood_pressure_x_alcohol_consumption__light_vs_heavy__interaction__2df_test_AMR,Mean_arterial_pressure_x_alcohol_consumpti…	1	0	1	0	0	EBNA2_gain_loop	chr15	75078429	75083847	loop_2608
chr15	75080872	75080872	rs2168519	Diastolic_blood_pressure_x_alcohol_consumption__light_vs_heavy__interaction__2df_test_AMR,Mean_arterial_pressure_x_alcohol_consumption__light_vs_heavy__interaction__2df_test_AMR,Diastolic_blood_pressure_x_alcohol_consumption__light_vs_heavy__interaction__2df_test_EAS,Mean_arterial_pressure_x_alcohol_consumption__light_vs_heavy__interaction__2df_test_EAS,Celiac_disease_EUR,Diastolic_blood_pressure…	1	0	1	0	0	EBNA2_gain_loop	chr15	75078429	75083847	loop_2608
chr15	75081078	75081078	rs2168518	Diastolic_blood_pressure__cigarette_smoking_interaction_AFR,Systolic_blood_pressure_AFR,Systolic_blood_pressure__cigarette_smoking_interaction_AFR,Diastolic_blood_pressure__cigarette_smoking_interaction_AMR,Systolic_blood_pressure_AMR,Systolic_blood_pressure__cigarette_smoking_interaction_AMR,Diastolic_blood_pressure__cigarette_smoking_interaction_EAS,Systolic_blood_pressure_EAS,Systolic_blood_pr…	0	0	0	0	0	EBNA2_gain_loop	chr15	75078429	75083847	loop_2608
chr15	75081745	75081745	rs3784790	Diastolic_blood_pressure_x_alcohol_consumption__light_vs_heavy__interaction__2df_test_AFR,Mean_arterial_pressure_x_alcohol_consumption__light_vs_heavy__interaction__2df_test_AFR,Systolic_blood_pressure_x_alcohol_consumption__light_vs_heavy__interaction__2df_test_AFR,Diastolic_blood_pressure_x_alcohol_consumption__light_vs_heavy__interaction__2df_test_AMR,Mean_arterial_pressure_x_alcohol_consumpti…	1	0	1	0	0	EBNA2_gain_loop	chr15	75078429	75083847	loop_2608
chr15	75082552	75082552	rs3784789	Diastolic_blood_pressure__cigarette_smoking_interaction_AFR,Systolic_blood_pressure_AFR,Systolic_blood_pressure__cigarette_smoking_interaction_AFR,Diastolic_blood_pressure__cigarette_smoking_interaction_AMR,Systolic_blood_pressure_AMR,Systolic_blood_pressure__cigarette_smoking_interaction_AMR,Diastolic_blood_pressure__cigarette_smoking_interaction_EAS,Systolic_blood_pressure_EAS,Systolic_blood_pr…	0	0	0	0	0	EBNA2_gain_loop	chr15	75078429	75083847	loop_2608
chr15	75083494	75083494	rs1378940	Diastolic_blood_pressure__cigarette_smoking_interaction_AFR,Systolic_blood_pressure_AFR,Systolic_blood_pressure__cigarette_smoking_interaction_AFR,Diastolic_blood_pressure__cigarette_smoking_interaction_AMR,Systolic_blood_pressure_AMR,Systolic_blood_pressure__cigarette_smoking_interaction_AMR,Diastolic_blood_pressure__cigarette_smoking_interaction_EAS,Systolic_blood_pressure_EAS,Systolic_blood_pr…	0	0	0	0	0	EBNA2_gain_loop	chr15	75078429	75083847	loop_2608
chr15	75114322	75114322	rs11636952	Mean_arterial_pressure_x_alcohol_consumption__light_vs_heavy__interaction__2df_test_AFR,Mean_arterial_pressure_x_alcohol_consumption_interaction__2df_test_AFR,Systolic_blood_pressure_x_alcohol_consumption__light_vs_heavy__interaction__2df_test_AFR,Systolic_blood_pressure_x_alcohol_consumption_interaction__2df_test_AFR,Mean_arterial_pressure_x_alcohol_consumption_interaction__2df_test_AMR,Systolic…	0	0	0	0	0	EBNA2_gain_loop	chr15	75112386	75115399	loop_2609
chr15	75114374	75114374	rs11072509	Mean_arterial_pressure_x_alcohol_consumption__light_vs_heavy__interaction__2df_test_AFR,Systolic_blood_pressure_x_alcohol_consumption__light_vs_heavy__interaction__2df_test_AFR,Diastolic_blood_pressure_x_alcohol_consumption__light_vs_heavy__interaction__2df_test_AMR,Mean_arterial_pressure_x_alcohol_consumption__light_vs_heavy__interaction__2df_test_AMR,Diastolic_blood_pressure_x_alcohol_consumpti…	1	0	1	0	0	EBNA2_gain_loop	chr15	75112386	75115399	loop_2609
chr15	75199892	75199892	rs11856413	Diastolic_blood_pressure_AMR,LDL_cholesterol_AMR,Mean_arterial_pressure_AMR,Systolic_blood_pressure_x_alcohol_consumption__light_vs_heavy__interaction__2df_test_AMR,Diastolic_blood_pressure_EUR,Mean_arterial_pressure_EUR	0	0	0	0	0	EBNA2_gain_loop	chr15	75197436	75200415	loop_2608
chr15	75340722	75340722	rs2304901	Systemic_lupus_erythematosus_EAS,Systemic_lupus_erythematosus_EUR	1	1	1	0	0	EBNA2_gain_loop	chr15	75338914	75341021	loop_2611
chr15	75340727	75340727	rs2304902	LDL_cholesterol_AFR,LDL_cholesterol_AMR	0	0	0	0	0	EBNA2_gain_loop	chr15	75338914	75341021	loop_2611
chr15	75628841	75628841	rs3809547	Height_EAS	0	0	0	0	0	EBNA2_gain_loop	chr15	75627323	75629509	loop_2614
chr15	80263217	80263217	rs3826007	Granulocyte_percentage_of_myeloid_white_cells_EUR,Monocyte_percentage_of_white_cells_EUR	0	0	1	0	0	EBNA2_up_genes	chr15	80263142	80264142	BCL2A1
chr15	80263345	80263345	rs1138358	Granulocyte_percentage_of_myeloid_white_cells_EUR,Monocyte_percentage_of_white_cells_EUR	0	0	1	0	0	EBNA2_up_genes	chr15	80263142	80264142	BCL2A1
chr15	80263406	80263406	rs1138357	Granulocyte_percentage_of_myeloid_white_cells_EUR,Monocyte_percentage_of_white_cells_EUR	0	0	1	0	0	EBNA2_up_genes	chr15	80263142	80264142	BCL2A1
chr15	81589648	81589648	rs4778890	Primary_biliary_cholangitis_EAS	1	0	1	0	0	EBNA2_loss_loop	chr15	81584761	81590644	loop_87
chr15	81589830	81589830	rs4778891	Primary_biliary_cholangitis_EAS	1	0	1	0	0	EBNA2_loss_loop	chr15	81584761	81590644	loop_87
chr15	83776182	83776182	rs113598767	Diastolic_blood_pressure_EAS	0	0	0	0	0	EBNA2_down_genes	chr15	83775823	83776823	TM6SF1
chr15	83776626	83776626	rs61323939	Diastolic_blood_pressure_EAS	0	0	0	0	0	EBNA2_down_genes	chr15	83775823	83776823	TM6SF1
chr15	85113972	85113972	rs11633075	Bipolar_disorder_lithium_response__categorical__or_schizophrenia_EUR,Schizophrenia_EUR	0	0	0	0	0	EBNA2_up_genes	chr15	85113525	85114525	UBE2Q2P1
chr15	85114237	85114237	rs62021165	Waist_circumference_adjusted_for_BMI__joint_analysis_main_effects_and_physical_activity_interaction_EAS,Waist_circumference_adjusted_for_BMI_in_active_individuals_EAS,Waist_circumference_adjusted_for_body_mass_index_EAS,Waist_circumference_adjusted_for_BMI__joint_analysis_main_effects_and_physical_activity_interaction_EUR,Waist_circumference_adjusted_for_BMI_in_active_individuals_EUR,Waist_circum…	0	0	0	0	0	EBNA2_up_genes	chr15	85113525	85114525	UBE2Q2P1
chr15	85114268	85114268	rs12905223	Bipolar_disorder_lithium_response__categorical__or_schizophrenia_EUR,Schizophrenia_EUR	0	0	0	0	0	EBNA2_up_genes	chr15	85113525	85114525	UBE2Q2P1
chr15	85114447	85114447	rs12912934	Bipolar_disorder_lithium_response__categorical__or_schizophrenia_EUR,Schizophrenia_EUR	0	0	0	0	0	EBNA2_up_genes	chr15	85113525	85114525	UBE2Q2P1
chr15	85196244	85196244	rs62021208	Autism_spectrum_disorder_or_schizophrenia_EUR	0	0	0	0	0	EBNA2_gain_loop	chr15	85196212	85198010	loop_2618
chr15	85197253	85197253	rs4842978	Creatine_kinase_levels_EAS,Diastolic_blood_pressure_EUR	0	0	0	0	0	EBNA2_gain_loop	chr15	85196212	85198010	loop_2618
chr15	85553781	85553781	rs35000527	Testicular_germ_cell_tumor_EUR	0	0	0	0	0	EBNA2_gain_loop	chr15	85550823	85554928	loop_2621
chr15	85554122	85554122	rs35816571	Testicular_germ_cell_tumor_EUR	0	0	0	0	0	EBNA2_gain_loop	chr15	85550823	85554928	loop_2621
chr15	85871812	85871812	rs6497000	Central_corneal_thickness_EAS	0	0	0	0	0	EBNA2_loss_loop	chr15	85870730	85875775	loop_88
chr15	85872055	85872055	rs6497004	Central_corneal_thickness_EAS	0	0	0	0	0	EBNA2_loss_loop	chr15	85870730	85875775	loop_88
chr15	85872269	85872269	rs10163035	Central_corneal_thickness_EAS,Central_corneal_thickness_EUR,Corneal_structure_EUR	0	0	0	0	0	EBNA2_loss_loop	chr15	85870730	85875775	loop_88
chr15	85872507	85872507	rs35808053	Central_corneal_thickness_EAS,Central_corneal_thickness_EUR,Corneal_structure_EUR	0	0	0	0	0	EBNA2_loss_loop	chr15	85870730	85875775	loop_88
chr15	85872509	85872509	rs35933592	Central_corneal_thickness_EAS	0	0	0	0	0	EBNA2_loss_loop	chr15	85870730	85875775	loop_88
chr15	85873537	85873537	rs6497006	Central_corneal_thickness_EAS,Central_corneal_thickness_EUR,Corneal_structure_EUR	0	0	0	0	0	EBNA2_loss_loop	chr15	85870730	85875775	loop_88
chr15	85874372	85874372	rs4843049	Corneal_structure_EAS,Corneal_structure_EUR	0	0	0	0	0	EBNA2_loss_loop	chr15	85870730	85875775	loop_88
chr15	85996416	85996416	rs72754513	Pulse_pressure_EAS	0	0	0	0	0	EBNA2_gain_loop	chr15	85995559	85998082	loop_2624
chr15	85997197	85997197	rs8027605	Pulse_pressure_AMR,Pulse_pressure_EAS,Pulse_pressure_EUR	0	0	0	0	0	EBNA2_gain_loop	chr15	85995559	85998082	loop_2624
chr15	86233009	86233009	rs7181796	Idiopathic_pulmonary_fibrosis_EUR	0	0	0	0	0	EBNA2_gain_loop	chr15	86231608	86236085	loop_2625
chr15	86233180	86233180	rs4843092	Systolic_blood_pressure_EAS,Eosinophil_percentage_of_granulocytes_EUR,Eosinophil_percentage_of_white_cells_EUR,Neutrophil_percentage_of_granulocytes_EUR	0	0	1	0	0	EBNA2_gain_loop	chr15	86231608	86236085	loop_2625
chr15	86233370	86233370	rs17574774	Systolic_blood_pressure_EAS,Eosinophil_percentage_of_granulocytes_EUR,Eosinophil_percentage_of_white_cells_EUR,Neutrophil_percentage_of_granulocytes_EUR	0	0	1	0	0	EBNA2_gain_loop	chr15	86231608	86236085	loop_2625
chr15	86234121	86234121	rs76844700	Mean_corpuscular_volume_EUR	0	0	0	0	0	EBNA2_gain_loop	chr15	86231608	86236085	loop_2625
chr15	86234589	86234589	rs17636864	Systolic_blood_pressure_EAS,Eosinophil_percentage_of_granulocytes_EUR,Eosinophil_percentage_of_white_cells_EUR,Neutrophil_percentage_of_granulocytes_EUR	0	0	1	0	0	EBNA2_gain_loop	chr15	86231608	86236085	loop_2625
chr15	86235235	86235235	rs16943251	Idiopathic_pulmonary_fibrosis_EUR	0	0	0	0	0	EBNA2_gain_loop	chr15	86231608	86236085	loop_2625
chr15	86235507	86235507	rs62022924	Idiopathic_pulmonary_fibrosis_EUR	0	0	0	0	0	EBNA2_gain_loop	chr15	86231608	86236085	loop_2625
chr15	86236066	86236066	rs62022925	Idiopathic_pulmonary_fibrosis_EUR	0	0	0	0	0	EBNA2_gain_loop	chr15	86231608	86236085	loop_2625
chr15	86249722	86249722	rs74346567	Mean_corpuscular_volume_EUR	0	0	0	0	0	EBNA2_gain_loop	chr15	86249239	86251796	loop_2624
chr15	86250882	86250882	rs62022939	Idiopathic_pulmonary_fibrosis_EUR	0	0	0	0	0	EBNA2_gain_loop	chr15	86249239	86251796	loop_2624
chr15	86262256	86262256	rs74025667	Mean_corpuscular_volume_EUR	0	0	0	0	0	EBNA2_open_Chromatin	chr15	86262198	86262369	104
chr15	90645821	90645821	rs17523637	Pulse_pressure_EUR	0	0	0	0	0	EBNA2_down_genes	chr15	90645285	90646285	IDH2
chr15	91498246	91498246	rs2001217	Type_2_diabetes_EAS	0	0	1	0	0	EBNA2_loss_loop	chr15	91497225	91500545	loop_90
chr15	91498281	91498281	rs4381579	Type_2_diabetes_EAS	0	0	1	0	0	EBNA2_loss_loop	chr15	91497225	91500545	loop_90
chr15	91498293	91498293	rs4505290	Type_2_diabetes_EAS	0	0	1	0	0	EBNA2_loss_loop	chr15	91497225	91500545	loop_90
chr15	91536225	91536225	rs73502775	Breast_cancer_EAS,Type_2_diabetes_EAS	0	0	1	0	0	EBNA2_loss_loop	chr15	91536183	91539287	loop_90
chr15	91536627	91536627	rs6496747	Type_2_diabetes_EAS,Type_2_diabetes_EUR	0	0	1	0	0	EBNA2_loss_loop	chr15	91536183	91539287	loop_90
chr15	91537151	91537151	rs11311113	Type_2_diabetes_EUR	0	0	1	0	0	EBNA2_loss_loop	chr15	91536183	91539287	loop_90
chr15	91537406	91537406	rs72630489	Breast_cancer_EAS,Type_2_diabetes_EAS	0	0	1	0	0	EBNA2_loss_loop	chr15	91536183	91539287	loop_90
chr15	91538920	91538920	rs78029804	Breast_cancer_EAS,Type_2_diabetes_EAS,Breast_cancer_EUR,Mean_platelet_volume_EUR,Platelet_count_EUR,Red_cell_distribution_width_EUR	0	0	1	0	0	EBNA2_loss_loop	chr15	91536183	91539287	loop_90
chr15	91539050	91539050	rs28404354	Type_2_diabetes_EAS	0	0	1	0	0	EBNA2_loss_loop	chr15	91536183	91539287	loop_90
chr15	93465187	93465187	rs1881837	Cognitive_performance__MTAG_EUR,Highest_math_class_taken__MTAG_EUR,Self_reported_math_ability_EUR,Self_reported_math_ability__MTAG_EUR	0	0	0	0	0	EBNA2_gain_loop	chr15	93462858	93466593	loop_2635
chr15	100104385	100104385	rs4424892	Systolic_blood_pressure_EAS	0	0	0	0	0	EBNA2_gain_loop	chr15	100104326	100108017	loop_2639
chr15	100105185	100105185	rs892465	Systolic_blood_pressure_AMR,Systolic_blood_pressure_EAS,Systolic_blood_pressure_EUR	0	0	0	0	0	EBNA2_gain_loop	chr15	100104326	100108017	loop_2639
chr15	100106646	100106646	rs4421955	Systolic_blood_pressure_EAS,Systolic_blood_pressure_EUR	0	0	0	0	0	EBNA2_gain_loop	chr15	100104326	100108017	loop_2639
chr15	100106731	100106731	rs12902009	Systolic_blood_pressure_AMR,Systolic_blood_pressure_EAS,Systolic_blood_pressure_EUR	0	0	0	0	0	EBNA2_gain_loop	chr15	100104326	100108017	loop_2639
chr15	101520895	101520895	chr15_101520895	Self_rated_health_EUR	0	0	0	0	0	EBNA2_gain_loop	chr15	101520519	101522845	loop_2640
chr16	717057	717057	rs7189028	Diastolic_blood_pressure_EUR	0	0	0	0	0	EBNA2_gain_loop	chr16	716830	718689	loop_2644
chr16	717085	717085	rs7197072	Age_of_smoking_initiation__MTAG_EUR,Educational_attainment__MTAG_EUR,Educational_attainment__years_of_education_EUR,Highest_math_class_taken__MTAG_EUR,Smoking_initiation__ever_regular_vs_never_regular_EUR,Smoking_initiation__ever_regular_vs_never_regular___MTAG_EUR	0	0	0	0	0	EBNA2_gain_loop	chr16	716830	718689	loop_2644
chr16	717523	717523	rs3752493	Diastolic_blood_pressure_EUR	0	0	0	0	0	EBNA2_gain_loop	chr16	716830	718689	loop_2644
chr16	717828	717828	rs3752490	Diastolic_blood_pressure_EUR	0	0	0	0	0	EBNA2_gain_loop	chr16	716830	718689	loop_2644
chr16	717971	717971	rs11865749	Diastolic_blood_pressure_EUR	0	0	0	0	0	EBNA2_gain_loop	chr16	716830	718689	loop_2644
chr16	745978	745978	rs78996697	Mean_corpuscular_hemoglobin_AMR	0	0	0	0	0	EBNA2_gain_loop	chr16	744958	747102	loop_2645
chr16	746165	746165	rs200136929	Mean_corpuscular_hemoglobin_AMR	0	0	0	0	0	EBNA2_gain_loop	chr16	744958	747102	loop_2645
chr16	746246	746246	rs146961592	Educational_attainment__MTAG_EUR,Educational_attainment__years_of_education_EUR,Highest_math_class_taken__MTAG_EUR	0	0	0	0	0	EBNA2_gain_loop	chr16	744958	747102	loop_2645
chr16	746487	746487	rs115819847	Mean_corpuscular_hemoglobin_AMR	0	0	0	0	0	EBNA2_gain_loop	chr16	744958	747102	loop_2645
chr16	746488	746488	rs4984914	Age_of_smoking_initiation__MTAG_EUR,Educational_attainment__MTAG_EUR,Educational_attainment__years_of_education_EUR,Highest_math_class_taken__MTAG_EUR,Smoking_initiation__ever_regular_vs_never_regular_EUR,Smoking_initiation__ever_regular_vs_never_regular___MTAG_EUR,Smoking_status__ever_vs_never_smokers_EUR	0	0	0	0	0	EBNA2_gain_loop	chr16	744958	747102	loop_2645
chr16	746611	746611	rs11861214	Age_of_smoking_initiation__MTAG_EUR,Educational_attainment__MTAG_EUR,Educational_attainment__years_of_education_EUR,Highest_math_class_taken__MTAG_EUR,Smoking_initiation__ever_regular_vs_never_regular_EUR,Smoking_initiation__ever_regular_vs_never_regular___MTAG_EUR,Smoking_status__ever_vs_never_smokers_EUR	0	0	0	0	0	EBNA2_gain_loop	chr16	744958	747102	loop_2645
chr16	746625	746625	rs77726033	Mean_corpuscular_hemoglobin_AMR,Hemoglobin_levels_EAS,Mean_corpuscular_hemoglobin_concentration_EAS,Mean_corpuscular_volume_EAS,Red_blood_cell_count_EAS	0	0	0	0	0	EBNA2_gain_loop	chr16	744958	747102	loop_2645
chr16	746884	746884	rs4984683	Age_of_smoking_initiation__MTAG_EUR,Educational_attainment__MTAG_EUR,Educational_attainment__years_of_education_EUR,Highest_math_class_taken__MTAG_EUR,Smoking_initiation__ever_regular_vs_never_regular_EUR,Smoking_initiation__ever_regular_vs_never_regular___MTAG_EUR,Smoking_status__ever_vs_never_smokers_EUR	0	0	0	0	0	EBNA2_gain_loop	chr16	744958	747102	loop_2645
chr16	746914	746914	rs4984915	Age_of_smoking_initiation__MTAG_EUR,Educational_attainment__MTAG_EUR,Educational_attainment__years_of_education_EUR,Highest_math_class_taken__MTAG_EUR,Smoking_initiation__ever_regular_vs_never_regular_EUR,Smoking_initiation__ever_regular_vs_never_regular___MTAG_EUR,Smoking_status__ever_vs_never_smokers_EUR	0	0	0	0	0	EBNA2_gain_loop	chr16	744958	747102	loop_2645
chr16	776721	776721	rs189324952	Mean_corpuscular_hemoglobin_AMR	0	0	0	0	0	EBNA2_gain_loop	chr16	775994	781543	loop_2646
chr16	778024	778024	rs1406814	Height_EUR	0	0	0	0	0	EBNA2_gain_loop	chr16	775994	781543	loop_2646
chr16	778158	778158	rs1406815	Height_EUR	0	0	0	0	0	EBNA2_gain_loop	chr16	775994	781543	loop_2646
chr16	778820	778820	rs12448432	Height_EUR	0	0	0	0	0	EBNA2_gain_loop	chr16	775994	781543	loop_2646
chr16	780339	780339	rs7205337	Height_EUR	0	0	0	0	0	EBNA2_gain_loop	chr16	775994	781543	loop_2646
chr16	781292	781292	rs13338700	Height_EUR	0	0	0	0	0	EBNA2_gain_loop	chr16	775994	781543	loop_2646
chr16	1524604	1524604	rs3751883	Femoral_neck_bone_mineral_density_EAS	0	0	0	0	0	EBNA2_gain_loop	chr16	1524317	1526675	loop_2649
chr16	1524850	1524850	rs3751884	Femoral_neck_bone_mineral_density_EAS	0	0	0	0	0	EBNA2_gain_loop	chr16	1524317	1526675	loop_2649
chr16	1525256	1525256	rs2332478	Femoral_neck_bone_mineral_density_EAS	0	0	0	0	0	EBNA2_gain_loop	chr16	1524317	1526675	loop_2649
chr16	1525779	1525779	rs3946124	Femoral_neck_bone_mineral_density_EAS,Heel_bone_mineral_density_EUR	0	0	0	0	0	EBNA2_gain_loop	chr16	1524317	1526675	loop_2649
chr16	1525850	1525850	rs28653458	Femoral_neck_bone_mineral_density_EAS,Heel_bone_mineral_density_EUR	0	0	0	0	0	EBNA2_gain_loop	chr16	1524317	1526675	loop_2649
chr16	1526144	1526144	rs8048281	Femoral_neck_bone_mineral_density_EAS,Heel_bone_mineral_density_EUR	0	0	0	0	0	EBNA2_gain_loop	chr16	1524317	1526675	loop_2649
chr16	1526174	1526174	rs8047668	Femoral_neck_bone_mineral_density_EAS,Heel_bone_mineral_density_EUR	0	0	0	0	0	EBNA2_gain_loop	chr16	1524317	1526675	loop_2649
chr16	1526251	1526251	rs8046561	Femoral_neck_bone_mineral_density_EAS,Heel_bone_mineral_density_EUR	0	0	0	0	0	EBNA2_gain_loop	chr16	1524317	1526675	loop_2649
chr16	1526293	1526293	rs8052828	Femoral_neck_bone_mineral_density_EAS,Heel_bone_mineral_density_EUR	0	0	0	0	0	EBNA2_gain_loop	chr16	1524317	1526675	loop_2649
chr16	1821726	1821726	chr16_1821726	Atrial_fibrillation_EUR	0	0	0	0	0	EBNA2_gain_loop	chr16	1820718	1824730	loop_2654
chr16	2008533	2008533	rs11642940	Atrial_fibrillation_EAS	0	0	0	0	0	EBNA2_gain_loop	chr16	2008145	2010461	loop_2655
chr16	2008543	2008543	rs71148114	Atrial_fibrillation_AFR,Atrial_fibrillation_EAS	0	0	0	0	0	EBNA2_gain_loop	chr16	2008145	2010461	loop_2655
chr16	2014031	2014031	rs6366	Atrial_fibrillation_EAS	0	0	0	0	0	EBNA2_gain_loop	chr16	2013394	2016510	loop_2658
chr16	2014283	2014283	rs2286466	Atrial_fibrillation_AFR,Atrial_fibrillation_EAS	0	0	0	0	0	EBNA2_gain_loop	chr16	2013394	2016510	loop_2658
chr16	2015552	2015552	rs61652593	Atrial_fibrillation_EAS	0	0	0	0	0	EBNA2_gain_loop	chr16	2013394	2016510	loop_2658
chr16	2557650	2557650	chr16_2557650	Diastolic_blood_pressure_AMR,Pulse_pressure_AMR,Systolic_blood_pressure_AMR	0	0	0	0	0	EBNA2_closed_chromatin	chr16	2557069	2557686	333
chr16	9045462	9045462	rs9926137	Platelet_distribution_width_EUR	0	0	0	0	0	EBNA2_loss_loop	chr16	9044402	9047307	loop_91
chr16	9047162	9047162	rs9936763	Platelet_distribution_width_EUR	0	0	0	0	0	EBNA2_loss_loop	chr16	9044402	9047307	loop_91
chr16	9047198	9047198	rs9924441	Platelet_count_EUR	0	0	0	0	0	EBNA2_loss_loop	chr16	9044402	9047307	loop_91
chr16	10961882	10961882	rs6498113	Nasopharyngeal_carcinoma_EAS	0	0	0	0	0	EBNA2_gain_loop	chr16	10961856	10965905	loop_2682
chr16	10963857	10963857	rs7501204	Nasopharyngeal_carcinoma_EAS,Celiac_disease_EUR,Celiac_disease_SAS	1	0	1	0	0	EBNA2_gain_loop	chr16	10961856	10965905	loop_2682
chr16	10963949	10963949	rs5815602	Nasopharyngeal_carcinoma_EAS,Celiac_disease_EUR,Celiac_disease_SAS	1	0	1	0	0	EBNA2_gain_loop	chr16	10961856	10965905	loop_2682
chr16	10964118	10964118	rs6498114	Nasopharyngeal_carcinoma_EAS,Celiac_disease_EUR,Celiac_disease_SAS	1	0	1	0	0	EBNA2_gain_loop	chr16	10961856	10965905	loop_2682
chr16	10965126	10965126	rs12922863	Nasopharyngeal_carcinoma_EAS,Celiac_disease_EUR,Celiac_disease_SAS	1	0	1	0	0	EBNA2_gain_loop	chr16	10961856	10965905	loop_2682
chr16	10965601	10965601	rs10445003	Nasopharyngeal_carcinoma_EAS,Celiac_disease_EUR,Celiac_disease_SAS	1	0	1	0	0	EBNA2_gain_loop	chr16	10961856	10965905	loop_2682
chr16	10971474	10971474	rs12928665	Nasopharyngeal_carcinoma_EAS	0	0	0	0	0	EBNA2_gain_loop	chr16	10970339	10972544	loop_2685
chr16	11179305	11179305	rs34443974	Asthma_AMR,Asthma_EAS,Nodular_sclerosis_Hodgkin_lymphoma_EUR	0	0	1	1	0	EBNA2_gain_loop	chr16	11179067	11184564	loop_2687
chr16	11179873	11179873	rs12708716	Systemic_lupus_erythematosus_AMR,Eosinophil_counts_EUR,Multiple_sclerosis_EUR,Primary_biliary_cholangitis_EUR,Primary_biliary_cirrhosis_EUR,Primary_sclerosing_cholangitis_EUR,Sum_eosinophil_basophil_counts_EUR,Systemic_lupus_erythematosus_EUR,Type_1_diabetes_EUR	1	1	1	0	0	EBNA2_gain_loop	chr16	11179067	11184564	loop_2687
chr16	11180537	11180537	rs7192287	Systemic_lupus_erythematosus_AMR,Eosinophil_counts_EUR,Multiple_sclerosis_EUR,Primary_biliary_cholangitis_EUR,Primary_biliary_cirrhosis_EUR,Primary_sclerosing_cholangitis_EUR,Sum_eosinophil_basophil_counts_EUR,Systemic_lupus_erythematosus_EUR,Type_1_diabetes_EUR	1	1	1	0	0	EBNA2_gain_loop	chr16	11179067	11184564	loop_2687
chr16	11181244	11181244	rs9888908	Systemic_lupus_erythematosus_AMR,Eosinophil_counts_EUR,Multiple_sclerosis_EUR,Primary_biliary_cholangitis_EUR,Primary_biliary_cirrhosis_EUR,Primary_sclerosing_cholangitis_EUR,Sum_eosinophil_basophil_counts_EUR,Systemic_lupus_erythematosus_EUR,Type_1_diabetes_EUR	1	1	1	0	0	EBNA2_gain_loop	chr16	11179067	11184564	loop_2687
chr16	11181756	11181756	rs7204099	Systemic_lupus_erythematosus_AMR,Eosinophil_counts_EUR,Multiple_sclerosis_EUR,Primary_biliary_cholangitis_EUR,Primary_biliary_cirrhosis_EUR,Primary_sclerosing_cholangitis_EUR,Sum_eosinophil_basophil_counts_EUR,Systemic_lupus_erythematosus_EUR,Type_1_diabetes_EUR	1	1	1	0	0	EBNA2_closed_chromatin	chr16	11181679	11182296	327
chr16	11181756	11181756	rs7204099	Systemic_lupus_erythematosus_AMR,Eosinophil_counts_EUR,Multiple_sclerosis_EUR,Primary_biliary_cholangitis_EUR,Primary_biliary_cirrhosis_EUR,Primary_sclerosing_cholangitis_EUR,Sum_eosinophil_basophil_counts_EUR,Systemic_lupus_erythematosus_EUR,Type_1_diabetes_EUR	1	1	1	0	0	EBNA2_gain_loop	chr16	11179067	11184564	loop_2687
chr16	11182134	11182134	rs7203793	Systemic_lupus_erythematosus_AFR,Systemic_lupus_erythematosus_AMR,Eosinophil_counts_EUR,Multiple_sclerosis_EUR,Primary_biliary_cholangitis_EUR,Primary_biliary_cirrhosis_EUR,Primary_sclerosing_cholangitis_EUR,Sum_eosinophil_basophil_counts_EUR,Systemic_lupus_erythematosus_EUR,Type_1_diabetes_EUR	1	1	1	0	0	EBNA2_closed_chromatin	chr16	11181679	11182296	327
chr16	11182134	11182134	rs7203793	Systemic_lupus_erythematosus_AFR,Systemic_lupus_erythematosus_AMR,Eosinophil_counts_EUR,Multiple_sclerosis_EUR,Primary_biliary_cholangitis_EUR,Primary_biliary_cirrhosis_EUR,Primary_sclerosing_cholangitis_EUR,Sum_eosinophil_basophil_counts_EUR,Systemic_lupus_erythematosus_EUR,Type_1_diabetes_EUR	1	1	1	0	0	EBNA2_gain_loop	chr16	11179067	11184564	loop_2687
chr16	11182893	11182893	rs11642009	Asthma_EAS	0	0	1	1	0	EBNA2_gain_loop	chr16	11179067	11184564	loop_2687
chr16	11183563	11183563	rs9888868	Pulse_pressure_EUR	0	0	0	0	0	EBNA2_gain_loop	chr16	11179067	11184564	loop_2687
chr16	11183626	11183626	rs11861236	Pulse_pressure_EUR	0	0	0	0	0	EBNA2_gain_loop	chr16	11179067	11184564	loop_2687
chr16	11187783	11187783	rs12924729	Systemic_lupus_erythematosus_AMR,Multiple_sclerosis_EUR,Primary_biliary_cholangitis_EUR,Primary_biliary_cirrhosis_EUR,Primary_sclerosing_cholangitis_EUR,Systemic_lupus_erythematosus_EUR,Type_1_diabetes_EUR	1	1	1	0	0	EBNA2_gain_loop	chr16	11186351	11189444	loop_2688
chr16	11187862	11187862	rs12917656	Pulse_pressure_EUR	0	0	0	0	0	EBNA2_gain_loop	chr16	11186351	11189444	loop_2688
chr16	11188930	11188930	rs12919083	Eosinophil_counts_EUR,Multiple_sclerosis_EUR,Primary_biliary_cholangitis_EUR,Primary_biliary_cirrhosis_EUR,Primary_sclerosing_cholangitis_EUR,Sum_eosinophil_basophil_counts_EUR,Systemic_lupus_erythematosus_EUR,Type_1_diabetes_EUR	1	1	1	0	0	EBNA2_gain_loop	chr16	11186351	11189444	loop_2688
chr16	11188940	11188940	rs71136618	Systemic_lupus_erythematosus_AFR,Systemic_lupus_erythematosus_AMR,Eosinophil_counts_EUR,Multiple_sclerosis_EUR,Primary_biliary_cholangitis_EUR,Primary_biliary_cirrhosis_EUR,Primary_sclerosing_cholangitis_EUR,Sum_eosinophil_basophil_counts_EUR,Systemic_lupus_erythematosus_EUR,Type_1_diabetes_EUR	1	1	1	0	0	EBNA2_gain_loop	chr16	11186351	11189444	loop_2688
chr16	11189148	11189148	rs12917716	Pulse_pressure_EUR	0	0	0	0	0	EBNA2_gain_loop	chr16	11186351	11189444	loop_2688
chr16	11389482	11389482	rs430966	Celiac_disease_EUR,Crohn_s_disease_EUR,Inflammatory_bowel_disease_EUR,Multiple_sclerosis_EUR	1	0	1	0	1	EBNA2_gain_loop	chr16	11386804	11394768	loop_2691
chr16	11389589	11389589	rs497184	Celiac_disease_EUR,Crohn_s_disease_EUR,Inflammatory_bowel_disease_EUR,Multiple_sclerosis_EUR	1	0	1	0	1	EBNA2_gain_loop	chr16	11386804	11394768	loop_2691
chr16	11389986	11389986	rs1690500	Celiac_disease_EUR,Crohn_s_disease_EUR,Inflammatory_bowel_disease_EUR,Multiple_sclerosis_EUR	1	0	1	0	1	EBNA2_gain_loop	chr16	11386804	11394768	loop_2691
chr16	11390445	11390445	rs12925649	Celiac_disease_EUR,Crohn_s_disease_EUR,Inflammatory_bowel_disease_EUR,Multiple_sclerosis_EUR	1	0	1	0	1	EBNA2_gain_loop	chr16	11386804	11394768	loop_2691
chr16	11391710	11391710	rs34437200	Celiac_disease_EUR,Crohn_s_disease_EUR,Inflammatory_bowel_disease_EUR,Multiple_sclerosis_EUR	1	0	1	0	1	EBNA2_gain_loop	chr16	11386804	11394768	loop_2691
chr16	11392098	11392098	rs60409583	Celiac_disease_EUR,Crohn_s_disease_EUR,Inflammatory_bowel_disease_EUR,Multiple_sclerosis_EUR	1	0	1	0	1	EBNA2_gain_loop	chr16	11386804	11394768	loop_2691
chr16	11400900	11400900	rs34832141	Celiac_disease_EUR,Crohn_s_disease_EUR,Inflammatory_bowel_disease_EUR,Multiple_sclerosis_EUR	1	0	1	0	1	EBNA2_gain_loop	chr16	11400759	11406147	loop_2685
chr16	11401503	11401503	rs35342456	Celiac_disease_EUR,Multiple_sclerosis_EUR	1	0	1	0	0	EBNA2_gain_loop	chr16	11400759	11406147	loop_2685
chr16	11401866	11401866	rs12600282	Celiac_disease_EUR,Crohn_s_disease_EUR,Inflammatory_bowel_disease_EUR,Multiple_sclerosis_EUR	1	0	1	0	1	EBNA2_gain_loop	chr16	11400759	11406147	loop_2685
chr16	11402350	11402350	rs12918017	Celiac_disease_EUR,Crohn_s_disease_EUR,Inflammatory_bowel_disease_EUR,Multiple_sclerosis_EUR	1	0	1	0	1	EBNA2_gain_loop	chr16	11400759	11406147	loop_2685
chr16	11402908	11402908	rs35307035	Celiac_disease_EUR,Crohn_s_disease_EUR,Inflammatory_bowel_disease_EUR,Multiple_sclerosis_EUR	1	0	1	0	1	EBNA2_gain_loop	chr16	11400759	11406147	loop_2685
chr16	11403013	11403013	rs12162021	Celiac_disease_EUR,Multiple_sclerosis_EUR	1	0	1	0	0	EBNA2_gain_loop	chr16	11400759	11406147	loop_2685
chr16	11403766	11403766	rs12924957	Celiac_disease_EUR,Crohn_s_disease_EUR,Inflammatory_bowel_disease_EUR,Multiple_sclerosis_EUR	1	0	1	0	1	EBNA2_gain_loop	chr16	11400759	11406147	loop_2685
chr16	11403893	11403893	rs12928822	Celiac_disease_EUR,Crohn_s_disease_EUR,Inflammatory_bowel_disease_EUR,Multiple_sclerosis_EUR	1	0	1	0	1	EBNA2_allelic	chr16	11403892	11403893	rs12928822
chr16	11403893	11403893	rs12928822	Celiac_disease_EUR,Crohn_s_disease_EUR,Inflammatory_bowel_disease_EUR,Multiple_sclerosis_EUR	1	0	1	0	1	EBNA2_gain_loop	chr16	11400759	11406147	loop_2685
chr16	11403963	11403963	rs12927773	Celiac_disease_EUR,Crohn_s_disease_EUR,Inflammatory_bowel_disease_EUR,Multiple_sclerosis_EUR	1	0	1	0	1	EBNA2_gain_loop	chr16	11400759	11406147	loop_2685
chr16	11404428	11404428	rs2216763	Celiac_disease_EUR,Crohn_s_disease_EUR,Inflammatory_bowel_disease_EUR,Multiple_sclerosis_EUR	1	0	1	0	1	EBNA2_gain_loop	chr16	11400759	11406147	loop_2685
chr16	11404857	11404857	rs1345880	Celiac_disease_EUR,Crohn_s_disease_EUR,Inflammatory_bowel_disease_EUR,Multiple_sclerosis_EUR	1	0	1	0	1	EBNA2_gain_loop	chr16	11400759	11406147	loop_2685
chr16	11422015	11422015	rs12935137	Celiac_disease_EUR,Crohn_s_disease_EUR,Inflammatory_bowel_disease_EUR,Multiple_sclerosis_EUR	1	0	1	0	1	EBNA2_gain_loop	chr16	11419966	11423644	loop_2691
chr16	11716104	11716104	rs4780394	Crohn_s_disease_EUR,Inflammatory_bowel_disease_EUR,Ulcerative_colitis_EUR	0	0	1	0	1	EBNA2_gain_loop	chr16	11711969	11718576	loop_2698
chr16	11718433	11718433	rs4781130	Crohn_s_disease_EUR,Inflammatory_bowel_disease_EUR,Ulcerative_colitis_EUR	0	0	1	0	1	EBNA2_gain_loop	chr16	11711969	11718576	loop_2698
chr16	23846952	23846952	rs3900007	Chronic_inflammatory_diseases__ankylosing_spondylitis__Crohn_s_disease__psoriasis__primary_sclerosing_cholangitis__ulcerative_colitis___pleiotropy_EUR,Inflammatory_bowel_disease_EUR,Ulcerative_colitis_EUR	1	1	1	0	1	EBNA2_open_Chromatin	chr16	23846917	23847529	327
chr16	23847013	23847013	rs3900008	Chronic_inflammatory_diseases__ankylosing_spondylitis__Crohn_s_disease__psoriasis__primary_sclerosing_cholangitis__ulcerative_colitis___pleiotropy_EUR,Inflammatory_bowel_disease_EUR,Ulcerative_colitis_EUR	1	1	1	0	1	EBNA2_open_Chromatin	chr16	23846917	23847529	327
chr16	23853860	23853860	rs7200798	Chronic_inflammatory_diseases__ankylosing_spondylitis__Crohn_s_disease__psoriasis__primary_sclerosing_cholangitis__ulcerative_colitis___pleiotropy_EUR,Inflammatory_bowel_disease_EUR,Ulcerative_colitis_EUR	1	1	1	0	1	EBNA2_allelic	chr16	23853859	23853860	rs7200798
chr16	27410829	27410829	rs2107357	Primary_biliary_cholangitis_EAS	1	0	1	0	0	EBNA2_gain_loop	chr16	27409197	27416591	loop_2727
chr16	27413566	27413566	rs2189521	Primary_biliary_cholangitis_EAS	1	0	1	0	0	EBNA2_gain_loop	chr16	27409197	27416591	loop_2727
chr16	28833097	28833097	rs62036620	BMI__adjusted_for_smoking_behaviour_AFR,BMI_in_non_smokers_AFR,Body_fat_percentage_AFR,Body_mass_index_AFR,Body_mass_index__joint_analysis_main_effects_and_physical_activity_interaction_AFR,Body_mass_index__joint_analysis_main_effects_and_smoking_interaction_AFR,Body_mass_index_in_physically_active_individuals_AFR,Weight_AFR,BMI__adjusted_for_smoking_behaviour_AMR,BMI_in_non_smokers_AMR,Body_mass…	0	0	1	0	1	EBNA2_gain_loop	chr16	28833088	28838159	loop_2730
chr16	28833229	28833229	rs200618724	BMI__adjusted_for_smoking_behaviour_AMR,BMI_in_non_smokers_AMR,Body_mass_index_AMR,Body_mass_index__joint_analysis_main_effects_and_smoking_interaction_AMR,BMI__adjusted_for_smoking_behaviour_EAS,BMI_in_non_smokers_EAS,Body_fat_percentage_EAS,Body_mass_index_EAS,Body_mass_index__joint_analysis_main_effects_and_physical_activity_interaction_EAS,Body_mass_index__joint_analysis_main_effects_and_smok…	0	0	1	0	1	EBNA2_gain_loop	chr16	28833088	28838159	loop_2730
chr16	28833299	28833299	rs62036621	BMI__adjusted_for_smoking_behaviour_AFR,BMI_in_non_smokers_AFR,Body_fat_percentage_AFR,Body_mass_index_AFR,Body_mass_index__joint_analysis_main_effects_and_physical_activity_interaction_AFR,Body_mass_index__joint_analysis_main_effects_and_smoking_interaction_AFR,Body_mass_index_in_physically_active_individuals_AFR,Weight_AFR,BMI__adjusted_for_smoking_behaviour_AMR,BMI_in_non_smokers_AMR,Body_mass…	0	0	1	0	1	EBNA2_gain_loop	chr16	28833088	28838159	loop_2730
chr16	28834254	28834254	rs201131521	BMI__adjusted_for_smoking_behaviour_AFR,BMI_in_non_smokers_AFR,Body_fat_percentage_AFR,Body_mass_index_AFR,Body_mass_index__joint_analysis_main_effects_and_physical_activity_interaction_AFR,Body_mass_index__joint_analysis_main_effects_and_smoking_interaction_AFR,Body_mass_index_in_physically_active_individuals_AFR,Weight_AFR,BMI__adjusted_for_smoking_behaviour_AMR,BMI_in_non_smokers_AMR,Body_mass…	0	0	1	0	1	EBNA2_gain_loop	chr16	28833088	28838159	loop_2730
chr16	28835680	28835680	rs149808056	BMI__adjusted_for_smoking_behaviour_AMR,BMI_in_non_smokers_AMR,Body_mass_index_AMR,Body_mass_index__joint_analysis_main_effects_and_smoking_interaction_AMR,BMI__adjusted_for_smoking_behaviour_EAS,BMI_in_non_smokers_EAS,Body_fat_percentage_EAS,Body_mass_index_EAS,Body_mass_index__joint_analysis_main_effects_and_physical_activity_interaction_EAS,Body_mass_index__joint_analysis_main_effects_and_smok…	0	0	1	0	1	EBNA2_gain_loop	chr16	28833088	28838159	loop_2730
chr16	28835682	28835682	rs138159013	BMI__adjusted_for_smoking_behaviour_AFR,BMI_in_non_smokers_AFR,Body_fat_percentage_AFR,Body_mass_index_AFR,Body_mass_index__joint_analysis_main_effects_and_physical_activity_interaction_AFR,Body_mass_index__joint_analysis_main_effects_and_smoking_interaction_AFR,Body_mass_index_in_physically_active_individuals_AFR,Weight_AFR	0	0	0	0	0	EBNA2_gain_loop	chr16	28833088	28838159	loop_2730
chr16	28836205	28836205	rs4451951	BMI__adjusted_for_smoking_behaviour_AFR,BMI_in_non_smokers_AFR,Body_fat_percentage_AFR,Body_mass_index_AFR,Body_mass_index__joint_analysis_main_effects_and_physical_activity_interaction_AFR,Body_mass_index__joint_analysis_main_effects_and_smoking_interaction_AFR,Body_mass_index_in_physically_active_individuals_AFR,Weight_AFR,BMI__adjusted_for_smoking_behaviour_AMR,BMI_in_non_smokers_AMR,Body_mass…	0	0	1	0	1	EBNA2_gain_loop	chr16	28833088	28838159	loop_2730
chr16	28836495	28836495	rs113964765	BMI__adjusted_for_smoking_behaviour_AFR,BMI_in_non_smokers_AFR,Body_fat_percentage_AFR,Body_mass_index_AFR,Body_mass_index__joint_analysis_main_effects_and_physical_activity_interaction_AFR,Body_mass_index__joint_analysis_main_effects_and_smoking_interaction_AFR,Body_mass_index_in_physically_active_individuals_AFR,Weight_AFR	0	0	0	0	0	EBNA2_gain_loop	chr16	28833088	28838159	loop_2730
chr16	28837203	28837203	rs62036622	BMI__adjusted_for_smoking_behaviour_AMR,BMI_in_non_smokers_AMR,Body_mass_index_AMR,Body_mass_index__joint_analysis_main_effects_and_smoking_interaction_AMR,BMI__adjusted_for_smoking_behaviour_EAS,BMI_in_non_smokers_EAS,Body_fat_percentage_EAS,Body_mass_index_EAS,Body_mass_index__joint_analysis_main_effects_and_physical_activity_interaction_EAS,Body_mass_index__joint_analysis_main_effects_and_smok…	0	0	1	0	1	EBNA2_gain_loop	chr16	28833088	28838159	loop_2730
chr16	28837515	28837515	rs8049439	BMI__adjusted_for_smoking_behaviour_AMR,BMI_in_non_smokers_AMR,Body_mass_index_AMR,Body_mass_index__joint_analysis_main_effects_and_smoking_interaction_AMR,BMI__adjusted_for_smoking_behaviour_EUR,BMI_in_non_smokers_EUR,Body_fat_distribution__arm_fat_ratio_EUR,Body_fat_distribution__leg_fat_ratio_EUR,Body_fat_distribution__trunk_fat_ratio_EUR,Body_mass_index_EUR,Body_mass_index__joint_analysis_mai…	0	0	1	0	1	EBNA2_gain_loop	chr16	28833088	28838159	loop_2730
chr16	28837906	28837906	rs8062405	BMI__adjusted_for_smoking_behaviour_AFR,BMI_in_non_smokers_AFR,Body_fat_percentage_AFR,Body_mass_index_AFR,Body_mass_index__joint_analysis_main_effects_and_physical_activity_interaction_AFR,Body_mass_index__joint_analysis_main_effects_and_smoking_interaction_AFR,Body_mass_index_in_physically_active_individuals_AFR,Weight_AFR,BMI__adjusted_for_smoking_behaviour_AMR,BMI_in_non_smokers_AMR,Body_mass…	0	0	1	0	1	EBNA2_gain_loop	chr16	28833088	28838159	loop_2730
chr16	28838073	28838073	rs12448482	General_risk_tolerance__MTAG_EUR	0	0	0	0	0	EBNA2_gain_loop	chr16	28833088	28838159	loop_2730
chr16	30008644	30008644	rs11649149	BMI__adjusted_for_smoking_behaviour_AMR,Body_mass_index_AMR,Body_mass_index__joint_analysis_main_effects_and_smoking_interaction_AMR,BMI__adjusted_for_smoking_behaviour_EAS,Body_mass_index_EAS,Body_mass_index__joint_analysis_main_effects_and_smoking_interaction_EAS,Schizophrenia_EAS,BMI__adjusted_for_smoking_behaviour_EUR,Body_mass_index__joint_analysis_main_effects_and_smoking_interaction_EUR,Fe…	0	0	0	0	0	EBNA2_gain_loop	chr16	30005772	30008852	loop_2742
chr16	30078492	30078492	rs9783783	Mean_corpuscular_volume_EAS	0	0	0	0	0	EBNA2_gain_loop	chr16	30074412	30078740	loop_2754
chr16	30103160	30103160	rs3809627	Red_blood_cell_count_EAS,Eosinophil_counts_EUR,Mean_corpuscular_hemoglobin_EUR,Mean_corpuscular_volume_EUR,Red_blood_cell_count_EUR,Sum_eosinophil_basophil_counts_EUR	0	0	1	0	0	EBNA2_gain_loop	chr16	30102803	30105146	loop_2755
chr16	30125840	30125840	rs7542	Mean_corpuscular_volume_EAS	0	0	0	0	0	EBNA2_gain_loop	chr16	30125159	30127139	loop_2755
chr16	30468890	30468890	rs67575585	Alcohol_consumption__drinks_per_week___MTAG_EUR	0	0	0	0	0	EBNA2_gain_loop	chr16	30467934	30471560	loop_2765
chr16	30469919	30469919	rs12926510	Chronic_inflammatory_diseases__ankylosing_spondylitis__Crohn_s_disease__psoriasis__primary_sclerosing_cholangitis__ulcerative_colitis___pleiotropy_EUR,Lymphocyte_counts_EUR,Lymphocyte_percentage_of_white_cells_EUR,Monocyte_count_EUR,Neutrophil_percentage_of_white_cells_EUR,Ulcerative_colitis_EUR,White_blood_cell_count_EUR	1	1	1	0	1	EBNA2_gain_loop	chr16	30467934	30471560	loop_2765
chr16	30469957	30469957	rs7195241	Alcohol_consumption__drinks_per_week___MTAG_EUR	0	0	0	0	0	EBNA2_gain_loop	chr16	30467934	30471560	loop_2765
chr16	30471109	30471109	rs7196129	Chronic_inflammatory_diseases__ankylosing_spondylitis__Crohn_s_disease__psoriasis__primary_sclerosing_cholangitis__ulcerative_colitis___pleiotropy_EUR,Lymphocyte_counts_EUR,Lymphocyte_percentage_of_white_cells_EUR,Monocyte_count_EUR,Neutrophil_percentage_of_white_cells_EUR,Ulcerative_colitis_EUR,White_blood_cell_count_EUR	1	1	1	0	1	EBNA2_gain_loop	chr16	30467934	30471560	loop_2765
chr16	30482494	30482494	rs11150589	Chronic_inflammatory_diseases__ankylosing_spondylitis__Crohn_s_disease__psoriasis__primary_sclerosing_cholangitis__ulcerative_colitis___pleiotropy_EUR,Lymphocyte_counts_EUR,Lymphocyte_percentage_of_white_cells_EUR,Monocyte_count_EUR,Myeloid_white_cell_count_EUR,Neutrophil_percentage_of_white_cells_EUR,Ulcerative_colitis_EUR,White_blood_cell_count_EUR	1	1	1	0	1	EBNA2_gain_loop	chr16	30480654	30485788	loop_2759
chr16	30482540	30482540	rs12598978	Chronic_inflammatory_diseases__ankylosing_spondylitis__Crohn_s_disease__psoriasis__primary_sclerosing_cholangitis__ulcerative_colitis___pleiotropy_EUR,Lymphocyte_counts_EUR,Lymphocyte_percentage_of_white_cells_EUR,Monocyte_count_EUR,Myeloid_white_cell_count_EUR,Neutrophil_percentage_of_white_cells_EUR,Ulcerative_colitis_EUR,White_blood_cell_count_EUR	1	1	1	0	1	EBNA2_gain_loop	chr16	30480654	30485788	loop_2759
chr16	30482803	30482803	rs12716977	Chronic_inflammatory_diseases__ankylosing_spondylitis__Crohn_s_disease__psoriasis__primary_sclerosing_cholangitis__ulcerative_colitis___pleiotropy_EUR,Lymphocyte_counts_EUR,Lymphocyte_percentage_of_white_cells_EUR,Monocyte_count_EUR,Myeloid_white_cell_count_EUR,Neutrophil_percentage_of_white_cells_EUR,Ulcerative_colitis_EUR,White_blood_cell_count_EUR	1	1	1	0	1	EBNA2_gain_loop	chr16	30480654	30485788	loop_2759
chr16	30485393	30485393	rs11574938	Chronic_inflammatory_diseases__ankylosing_spondylitis__Crohn_s_disease__psoriasis__primary_sclerosing_cholangitis__ulcerative_colitis___pleiotropy_EUR,Lymphocyte_counts_EUR,Lymphocyte_percentage_of_white_cells_EUR,Monocyte_count_EUR,Myeloid_white_cell_count_EUR,Neutrophil_percentage_of_white_cells_EUR,Ulcerative_colitis_EUR,White_blood_cell_count_EUR	1	1	1	0	1	EBNA2_gain_loop	chr16	30480654	30485788	loop_2759
chr16	30584430	30584430	rs34114657	Systemic_lupus_erythematosus_EAS	1	1	1	0	0	EBNA2_gain_loop	chr16	30581900	30584922	loop_2770
chr16	30610876	30610876	rs35661204	Systemic_lupus_erythematosus_EAS	1	1	1	0	0	EBNA2_gain_loop	chr16	30608843	30610952	loop_2773
chr16	30671532	30671532	rs35629860	Pulse_pressure_AMR,Pulse_pressure_EAS,Systemic_lupus_erythematosus_EAS,Multiple_myeloma_EUR,Pulse_pressure_EUR	1	1	1	0	0	EBNA2_gain_loop	chr16	30668672	30672988	loop_2754
chr16	30672097	30672097	rs67128646	Pulse_pressure_AMR,Pulse_pressure_EAS,Systemic_lupus_erythematosus_EAS,Multiple_myeloma_EUR,Pulse_pressure_EUR	1	1	1	0	0	EBNA2_gain_loop	chr16	30668672	30672988	loop_2754
chr16	30672719	30672719	rs885107	Pulse_pressure_AMR,Pulse_pressure_EAS,Systemic_lupus_erythematosus_EAS,Multiple_myeloma_EUR,Pulse_pressure_EUR	1	1	1	0	0	EBNA2_gain_loop	chr16	30668672	30672988	loop_2754
chr16	30968589	30968589	rs4889599	Diastolic_blood_pressure_EAS,Psoriasis_EAS,Chronic_inflammatory_diseases__ankylosing_spondylitis__Crohn_s_disease__psoriasis__primary_sclerosing_cholangitis__ulcerative_colitis___pleiotropy_EUR,Feeling_tense_EUR,Irritable_mood_EUR,Mean_corpuscular_hemoglobin_EUR,Mean_corpuscular_volume_EUR,Neurociticism_EUR,Neuroticism_EUR,Psoriasis_EUR,Psoriasis_vulgaris_EUR,Red_blood_cell_count_EUR,Self_reporte…	1	1	1	0	1	EBNA2_gain_loop	chr16	30967550	30970602	loop_2777
chr16	30969485	30969485	rs201675920	Diastolic_blood_pressure_AMR,Diastolic_blood_pressure_EAS,Psoriasis_EAS,Diastolic_blood_pressure_EUR	1	1	1	0	0	EBNA2_gain_loop	chr16	30967550	30970602	loop_2777
chr16	30969486	30969486	rs11643872	Diastolic_blood_pressure_EAS,Psoriasis_EAS,Heel_bone_mineral_density_EUR,Hip_circumference_EUR,Triglycerides_EUR	1	1	1	0	0	EBNA2_gain_loop	chr16	30967550	30970602	loop_2777
chr16	30969557	30969557	rs62055866	Diastolic_blood_pressure_EAS,Psoriasis_EAS,Chronic_inflammatory_diseases__ankylosing_spondylitis__Crohn_s_disease__psoriasis__primary_sclerosing_cholangitis__ulcerative_colitis___pleiotropy_EUR,Feeling_tense_EUR,Irritable_mood_EUR,Mean_corpuscular_hemoglobin_EUR,Mean_corpuscular_volume_EUR,Neurociticism_EUR,Neuroticism_EUR,Psoriasis_EUR,Psoriasis_vulgaris_EUR,Red_blood_cell_count_EUR,Self_reporte…	1	1	1	0	1	EBNA2_gain_loop	chr16	30967550	30970602	loop_2777
chr16	31044683	31044683	rs58726213	BMI__adjusted_for_smoking_behaviour_EAS,Body_mass_index_EAS,Triglyceride_levels_EAS,Chronic_inflammatory_diseases__ankylosing_spondylitis__Crohn_s_disease__psoriasis__primary_sclerosing_cholangitis__ulcerative_colitis___pleiotropy_EUR,Feeling_tense_EUR,Irritable_mood_EUR,Mean_corpuscular_hemoglobin_EUR,Mean_corpuscular_volume_EUR,Neurociticism_EUR,Neuroticism_EUR,Psoriasis_EUR,Psoriasis_vulgaris_…	1	1	1	0	1	EBNA2_gain_loop	chr16	31043323	31046449	loop_2777
chr16	31044897	31044897	rs12445650	BMI__adjusted_for_smoking_behaviour_EAS,Body_mass_index_EAS,Triglyceride_levels_EAS,Chronic_inflammatory_diseases__ankylosing_spondylitis__Crohn_s_disease__psoriasis__primary_sclerosing_cholangitis__ulcerative_colitis___pleiotropy_EUR,Feeling_tense_EUR,Irritable_mood_EUR,Mean_corpuscular_volume_EUR,Neurociticism_EUR,Neuroticism_EUR,Psoriasis_EUR,Psoriasis_vulgaris_EUR,Self_reported_math_ability_E…	1	1	1	0	1	EBNA2_gain_loop	chr16	31043323	31046449	loop_2777
chr16	31128088	31128088	rs149187641	BMI__adjusted_for_smoking_behaviour_AMR,Body_mass_index_AMR,BMI__adjusted_for_smoking_behaviour_EAS,Body_mass_index_EAS,Triglyceride_levels_EAS,BMI__adjusted_for_smoking_behaviour_EUR,Body_fat_distribution__arm_fat_ratio_EUR,Body_mass_index_EUR,Hip_circumference_EUR,Parkinson_s_disease_EUR,Triglyceride_levels_EUR,Waist_circumference_EUR	0	0	0	0	0	EBNA2_gain_loop	chr16	31128013	31130229	loop_2779
chr16	31128615	31128615	rs4889619	BMI__adjusted_for_smoking_behaviour_AMR,Body_mass_index_AMR,BMI__adjusted_for_smoking_behaviour_EAS,Body_mass_index_EAS,Triglyceride_levels_EAS,BMI__adjusted_for_smoking_behaviour_EUR,Body_fat_distribution__arm_fat_ratio_EUR,Body_mass_index_EUR,Hip_circumference_EUR,Parkinson_s_disease_EUR,Triglyceride_levels_EUR,Waist_circumference_EUR	0	0	0	0	0	EBNA2_gain_loop	chr16	31128013	31130229	loop_2779
chr16	31128668	31128668	rs12716982	BMI__adjusted_for_smoking_behaviour_AMR,Body_mass_index_AMR,BMI__adjusted_for_smoking_behaviour_EAS,Body_mass_index_EAS,Triglyceride_levels_EAS,BMI__adjusted_for_smoking_behaviour_EUR,Body_fat_distribution__arm_fat_ratio_EUR,Body_mass_index_EUR,Hip_circumference_EUR,Parkinson_s_disease_EUR,Triglyceride_levels_EUR,Waist_circumference_EUR	0	0	0	0	0	EBNA2_gain_loop	chr16	31128013	31130229	loop_2779
chr16	31129895	31129895	rs9925964	BMI__adjusted_for_smoking_behaviour_AFR,Body_mass_index_AFR,BMI__adjusted_for_smoking_behaviour_AMR,Body_mass_index_AMR,BMI__adjusted_for_smoking_behaviour_EAS,Body_mass_index_EAS,Triglyceride_levels_EAS,BMI__adjusted_for_smoking_behaviour_EUR,Body_fat_distribution__arm_fat_ratio_EUR,Body_mass_index_EUR,Hip_circumference_EUR,Parkinson_s_disease_EUR,Triglyceride_levels_EUR,Waist_circumference_EUR	0	0	0	0	0	EBNA2_gain_loop	chr16	31128013	31130229	loop_2779
chr16	31129942	31129942	rs1978487	BMI__adjusted_for_smoking_behaviour_AMR,Body_mass_index_AMR,BMI__adjusted_for_smoking_behaviour_EAS,Body_mass_index_EAS,Triglyceride_levels_EAS,BMI__adjusted_for_smoking_behaviour_EUR,Body_fat_distribution__arm_fat_ratio_EUR,Body_mass_index_EUR,Parkinson_s_disease_EUR,Triglyceride_levels_EUR,Waist_circumference_EUR	0	0	0	0	0	EBNA2_gain_loop	chr16	31128013	31130229	loop_2779
chr16	57075180	57075180	rs7192652	Lymphocyte_counts_EUR	0	0	1	0	0	EBNA2_gain_loop	chr16	57072909	57077986	loop_2787
chr16	62160458	62160458	rs12162013	Educational_attainment__years_of_education_EUR	0	0	0	0	0	EBNA2_open_Chromatin	chr16	62160373	62160614	122
chr16	67259567	67259567	rs7196793	Heel_bone_mineral_density_EUR	0	0	0	0	0	EBNA2_gain_loop	chr16	67259517	67261961	loop_2792
chr16	67259663	67259663	rs7196989	HDL_cholesterol_EUR	0	0	0	0	0	EBNA2_gain_loop	chr16	67259517	67261961	loop_2792
chr16	67261525	67261525	rs3852699	Heel_bone_mineral_density_EUR	0	0	0	0	0	EBNA2_gain_loop	chr16	67259517	67261961	loop_2792
chr16	67261847	67261847	rs6499116	Waist_circumference_adjusted_for_BMI__adjusted_for_smoking_behaviour_EAS,Waist_circumference_adjusted_for_BMI__joint_analysis_main_effects_and_physical_activity_interaction_EAS,Waist_circumference_adjusted_for_BMI__joint_analysis_main_effects_and_smoking_interaction_EAS,Waist_circumference_adjusted_for_BMI_in_non_smokers_EAS,Waist_circumference_adjusted_for_body_mass_index_EAS,Waist_to_hip_ratio_…	0	0	0	0	0	EBNA2_gain_loop	chr16	67259517	67261961	loop_2792
chr16	67311721	67311721	rs115328599	Heel_bone_mineral_density_EUR	0	0	0	0	0	EBNA2_up_genes	chr16	67311559	67312559	PLEKHG4
chr16	67311767	67311767	rs8050745	Waist_circumference_adjusted_for_BMI__adjusted_for_smoking_behaviour_EAS,Waist_circumference_adjusted_for_BMI__joint_analysis_main_effects_and_physical_activity_interaction_EAS,Waist_circumference_adjusted_for_BMI__joint_analysis_main_effects_and_smoking_interaction_EAS,Waist_circumference_adjusted_for_BMI_in_non_smokers_EAS,Waist_circumference_adjusted_for_body_mass_index_EAS,Waist_to_hip_ratio_…	0	0	0	0	0	EBNA2_up_genes	chr16	67311559	67312559	PLEKHG4
chr16	67522289	67522289	rs7195790	Waist_circumference_adjusted_for_BMI__joint_analysis_main_effects_and_physical_activity_interaction_AFR,Waist_circumference_adjusted_for_body_mass_index_AFR,Waist_to_hip_ratio_adjusted_for_BMI__additive_genetic_model_AFR,Waist_to_hip_ratio_adjusted_for_BMI__additive_genetic_model_AMR	0	0	0	0	0	EBNA2_gain_loop	chr16	67522253	67524543	loop_2793
chr16	67549547	67549547	rs13333582	Waist_circumference_adjusted_for_BMI__joint_analysis_main_effects_and_physical_activity_interaction_AFR,Waist_circumference_adjusted_for_body_mass_index_AFR,Waist_to_hip_ratio_adjusted_for_BMI__additive_genetic_model_AFR,Waist_to_hip_ratio_adjusted_for_BMI__additive_genetic_model_AMR,Waist_circumference_adjusted_for_BMI__adjusted_for_smoking_behaviour_EAS,Waist_circumference_adjusted_for_BMI__joi…	0	0	0	0	0	EBNA2_gain_loop	chr16	67549346	67553740	loop_2794
chr16	67549653	67549653	rs2089401	Waist_to_hip_ratio_adjusted_for_body_mass_index_EUR	0	0	0	0	0	EBNA2_gain_loop	chr16	67549346	67553740	loop_2794
chr16	67549746	67549746	rs2089402	Waist_circumference_adjusted_for_BMI__adjusted_for_smoking_behaviour_AMR,Waist_circumference_adjusted_for_BMI__joint_analysis_main_effects_and_smoking_interaction_AMR,Waist_circumference_adjusted_for_BMI_in_non_smokers_AMR,Waist_circumference_adjusted_for_BMI__adjusted_for_smoking_behaviour_EAS,Waist_circumference_adjusted_for_BMI__joint_analysis_main_effects_and_physical_activity_interaction_EAS…	0	0	0	0	0	EBNA2_gain_loop	chr16	67549346	67553740	loop_2794
chr16	67581123	67581123	rs74544147	Waist_circumference_adjusted_for_BMI__adjusted_for_smoking_behaviour_EAS,Waist_circumference_adjusted_for_BMI__joint_analysis_main_effects_and_physical_activity_interaction_EAS,Waist_circumference_adjusted_for_BMI__joint_analysis_main_effects_and_smoking_interaction_EAS,Waist_circumference_adjusted_for_BMI_in_non_smokers_EAS,Waist_circumference_adjusted_for_body_mass_index_EAS,Waist_to_hip_ratio_…	0	0	0	0	0	EBNA2_gain_loop	chr16	67579595	67584763	loop_2796
chr16	67836552	67836552	rs55661503	HDL_cholesterol_AFR,HDL_cholesterol_x_physical_activity_interaction__2df_test_AFR,High_density_lipoprotein_cholesterol_levels_AFR,HDL_cholesterol_AMR,HDL_cholesterol_x_physical_activity_interaction__2df_test_AMR,High_density_lipoprotein_cholesterol_levels_AMR,HDL_cholesterol_x_physical_activity_interaction__2df_test_EAS,High_density_lipoprotein_cholesterol_levels_EAS,HDL_cholesterol_EUR,HDL_chole…	0	0	0	0	0	EBNA2_gain_loop	chr16	67835680	67837206	loop_2800
chr16	67866783	67866783	rs73593810	HDL_cholesterol_AFR,HDL_cholesterol_x_physical_activity_interaction__2df_test_AFR,High_density_lipoprotein_cholesterol_levels_AFR,HDL_cholesterol_AMR,HDL_cholesterol_x_physical_activity_interaction__2df_test_AMR,High_density_lipoprotein_cholesterol_levels_AMR,HDL_cholesterol_x_physical_activity_interaction__2df_test_EAS,High_density_lipoprotein_cholesterol_levels_EAS,HDL_cholesterol_EUR,HDL_chole…	0	0	0	0	0	EBNA2_gain_loop	chr16	67866204	67868981	loop_2801
chr16	67876823	67876823	rs28647874	Red_blood_cell_count_EUR	0	0	0	0	0	EBNA2_gain_loop	chr16	67875048	67877935	loop_2801
chr16	67876826	67876826	rs3982383	Red_blood_cell_count_EUR	0	0	0	0	0	EBNA2_gain_loop	chr16	67875048	67877935	loop_2801
chr16	67920049	67920049	rs73594554	HDL_cholesterol_AFR,HDL_cholesterol_x_physical_activity_interaction__2df_test_AFR,High_density_lipoprotein_cholesterol_levels_AFR,HDL_cholesterol_AMR,HDL_cholesterol_x_physical_activity_interaction__2df_test_AMR,High_density_lipoprotein_cholesterol_levels_AMR,HDL_cholesterol_x_physical_activity_interaction__2df_test_EAS,High_density_lipoprotein_cholesterol_levels_EAS,HDL_cholesterol_EUR,HDL_chole…	0	0	0	0	0	EBNA2_gain_loop	chr16	67918345	67920337	loop_2807
chr16	67927124	67927124	rs7196789	HDL_cholesterol_x_physical_activity_interaction__2df_test_EAS,High_density_lipoprotein_cholesterol_levels_EAS,Educational_attainment__MTAG_EUR,Educational_attainment__years_of_education_EUR,Highest_math_class_taken__MTAG_EUR,Metabolic_syndrome_EUR	0	0	0	0	0	EBNA2_gain_loop	chr16	67926542	67928693	loop_2796
chr16	67928042	67928042	rs16942887	HDL_cholesterol_AFR,HDL_cholesterol_x_physical_activity_interaction__2df_test_AFR,High_density_lipoprotein_cholesterol_levels_AFR,HDL_cholesterol_AMR,HDL_cholesterol_x_physical_activity_interaction__2df_test_AMR,High_density_lipoprotein_cholesterol_levels_AMR,HDL_cholesterol_x_physical_activity_interaction__2df_test_EAS,High_density_lipoprotein_cholesterol_levels_EAS,HDL_cholesterol_EUR,HDL_chole…	0	0	0	0	0	EBNA2_gain_loop	chr16	67926542	67928693	loop_2796
chr16	67969531	67969531	rs14178	Myopia__age_of_diagnosis_EUR	0	0	0	0	0	EBNA2_gain_loop	chr16	67969102	67971762	loop_2808
chr16	67969930	67969930	rs20549	HDL_cholesterol_levels_EAS,Educational_attainment__MTAG_EUR,Educational_attainment__years_of_education_EUR,Highest_math_class_taken_EUR,Highest_math_class_taken__MTAG_EUR,Metabolic_syndrome_EUR,Self_reported_math_ability__MTAG_EUR	0	0	0	0	0	EBNA2_gain_loop	chr16	67969102	67971762	loop_2808
chr16	68020492	68020492	rs255053	HDL_cholesterol_levels_EAS,Schizophrenia_EAS,Educational_attainment__MTAG_EUR,Educational_attainment__years_of_education_EUR,Highest_math_class_taken_EUR,Highest_math_class_taken__MTAG_EUR,Metabolic_syndrome_EUR,Self_reported_math_ability__MTAG_EUR	0	0	0	0	0	EBNA2_gain_loop	chr16	68017426	68021123	loop_2810
chr16	68020492	68020492	rs255053	HDL_cholesterol_levels_EAS,Schizophrenia_EAS,Educational_attainment__MTAG_EUR,Educational_attainment__years_of_education_EUR,Highest_math_class_taken_EUR,Highest_math_class_taken__MTAG_EUR,Metabolic_syndrome_EUR,Self_reported_math_ability__MTAG_EUR	0	0	0	0	0	EBNA2_loss_loop	chr16	68017426	68021123	loop_95
chr16	68020841	68020841	rs5817626	HDL_cholesterol_levels_EAS,Schizophrenia_EAS,Educational_attainment__MTAG_EUR,Educational_attainment__years_of_education_EUR,Highest_math_class_taken__MTAG_EUR,Metabolic_syndrome_EUR	0	0	0	0	0	EBNA2_gain_loop	chr16	68017426	68021123	loop_2810
chr16	68020841	68020841	rs5817626	HDL_cholesterol_levels_EAS,Schizophrenia_EAS,Educational_attainment__MTAG_EUR,Educational_attainment__years_of_education_EUR,Highest_math_class_taken__MTAG_EUR,Metabolic_syndrome_EUR	0	0	0	0	0	EBNA2_loss_loop	chr16	68017426	68021123	loop_95
chr16	68284754	68284754	rs73612297	HDL_cholesterol_levels_EAS,Schizophrenia_EAS,Highest_math_class_taken_EUR,Schizophrenia_EUR,Self_reported_math_ability__MTAG_EUR	0	0	0	0	0	EBNA2_loss_loop	chr16	68282757	68288197	loop_95
chr16	68285847	68285847	rs1975802	HDL_cholesterol_levels_EAS,Schizophrenia_EAS,Educational_attainment__MTAG_EUR,Educational_attainment__years_of_education_EUR,Highest_math_class_taken_EUR,Highest_math_class_taken__MTAG_EUR,Schizophrenia_EUR,Self_reported_math_ability__MTAG_EUR	0	0	0	0	0	EBNA2_loss_loop	chr16	68282757	68288197	loop_95
chr16	68286427	68286427	rs17688076	HDL_cholesterol_levels_EAS,Schizophrenia_EAS,HDL_cholesterol_levels_EUR,Intelligence_EUR	0	0	0	0	0	EBNA2_loss_loop	chr16	68282757	68288197	loop_95
chr16	68286578	68286578	rs11368218	HDL_cholesterol_levels_EAS,Schizophrenia_EAS,Highest_math_class_taken_EUR,Schizophrenia_EUR,Self_reported_math_ability__MTAG_EUR	0	0	0	0	0	EBNA2_loss_loop	chr16	68282757	68288197	loop_95
chr16	68286748	68286748	rs55897859	HDL_cholesterol_levels_EAS,Schizophrenia_EAS	0	0	0	0	0	EBNA2_loss_loop	chr16	68282757	68288197	loop_95
chr16	68287544	68287544	rs12600062	HDL_cholesterol_levels_EAS,Schizophrenia_EAS	0	0	0	0	0	EBNA2_loss_loop	chr16	68282757	68288197	loop_95
chr16	68297228	68297228	rs9888986	Intelligence_EUR	0	0	0	0	0	EBNA2_gain_loop	chr16	68297015	68300466	loop_2816
chr16	68297589	68297589	rs9888796	Estimated_glomerular_filtration_rate_AFR,Estimated_glomerular_filtration_rate_AMR,Estimated_glomerular_filtration_rate_EAS,Blood_metabolite_levels_EUR,Blood_metabolite_ratios_EUR,Cognitive_performance__MTAG_EUR,Educational_attainment__MTAG_EUR,Educational_attainment__years_of_education_EUR,Estimated_glomerular_filtration_rate_EUR,Metabolic_traits_EUR,Serum_metabolite_levels_EUR	0	0	0	0	0	EBNA2_gain_loop	chr16	68297015	68300466	loop_2816
chr16	68297928	68297928	rs12447119	Intelligence_EUR	0	0	0	0	0	EBNA2_gain_loop	chr16	68297015	68300466	loop_2816
chr16	68561227	68561227	rs698714	Systemic_lupus_erythematosus_AMR,Systemic_lupus_erythematosus_EAS,Systemic_lupus_erythematosus_EUR,Ulcerative_colitis_EUR	1	1	1	0	1	EBNA2_gain_loop	chr16	68561037	68565818	loop_2820
chr16	68561879	68561879	rs698712	Systemic_lupus_erythematosus_AFR,Systemic_lupus_erythematosus_AMR,Systemic_lupus_erythematosus_EAS,Systemic_lupus_erythematosus_EUR,Ulcerative_colitis_EUR	1	1	1	0	1	EBNA2_gain_loop	chr16	68561037	68565818	loop_2820
chr16	68561955	68561955	rs698711	Systemic_lupus_erythematosus_AFR,Systemic_lupus_erythematosus_AMR,Systemic_lupus_erythematosus_EAS,Systemic_lupus_erythematosus_EUR,Ulcerative_colitis_EUR	1	1	1	0	1	EBNA2_gain_loop	chr16	68561037	68565818	loop_2820
chr16	68562815	68562815	rs4783653	Systemic_lupus_erythematosus_AFR,Systemic_lupus_erythematosus_AMR,Systemic_lupus_erythematosus_EAS,Systemic_lupus_erythematosus_EUR,Ulcerative_colitis_EUR	1	1	1	0	1	EBNA2_gain_loop	chr16	68561037	68565818	loop_2820
chr16	68562963	68562963	rs4783562	Systemic_lupus_erythematosus_AMR,Systemic_lupus_erythematosus_EAS,Systemic_lupus_erythematosus_EUR,Ulcerative_colitis_EUR	1	1	1	0	1	EBNA2_gain_loop	chr16	68561037	68565818	loop_2820
chr16	68563509	68563509	rs1645976	Systemic_lupus_erythematosus_AFR,Systemic_lupus_erythematosus_AMR,Systemic_lupus_erythematosus_EAS,Systemic_lupus_erythematosus_EUR,Ulcerative_colitis_EUR	1	1	1	0	1	EBNA2_gain_loop	chr16	68561037	68565818	loop_2820
chr16	68563644	68563644	rs1728773	Systemic_lupus_erythematosus_AFR,Systemic_lupus_erythematosus_AMR,Systemic_lupus_erythematosus_EAS,Systemic_lupus_erythematosus_EUR,Ulcerative_colitis_EUR	1	1	1	0	1	EBNA2_gain_loop	chr16	68561037	68565818	loop_2820
chr16	68563743	68563743	rs1645936	Systemic_lupus_erythematosus_EUR,Ulcerative_colitis_EUR	1	1	1	0	1	EBNA2_gain_loop	chr16	68561037	68565818	loop_2820
chr16	68563791	68563791	rs1645935	Systemic_lupus_erythematosus_AFR,Systemic_lupus_erythematosus_AMR,Systemic_lupus_erythematosus_EAS,Systemic_lupus_erythematosus_EUR,Ulcerative_colitis_EUR	1	1	1	0	1	EBNA2_gain_loop	chr16	68561037	68565818	loop_2820
chr16	68564124	68564124	rs1728770	Systemic_lupus_erythematosus_AMR,Systemic_lupus_erythematosus_EAS,Systemic_lupus_erythematosus_EUR,Ulcerative_colitis_EUR	1	1	1	0	1	EBNA2_gain_loop	chr16	68561037	68565818	loop_2820
chr16	68564186	68564186	rs1728769	Systemic_lupus_erythematosus_AFR,Systemic_lupus_erythematosus_AMR,Systemic_lupus_erythematosus_EAS,Systemic_lupus_erythematosus_EUR,Ulcerative_colitis_EUR	1	1	1	0	1	EBNA2_gain_loop	chr16	68561037	68565818	loop_2820
chr16	68564448	68564448	rs1645975	Systemic_lupus_erythematosus_AFR,Systemic_lupus_erythematosus_AMR,Systemic_lupus_erythematosus_EAS,Systemic_lupus_erythematosus_EUR,Ulcerative_colitis_EUR	1	1	1	0	1	EBNA2_gain_loop	chr16	68561037	68565818	loop_2820
chr16	68564490	68564490	rs1645934	Systemic_lupus_erythematosus_AFR,Systemic_lupus_erythematosus_AMR,Systemic_lupus_erythematosus_EAS,Systemic_lupus_erythematosus_EUR,Ulcerative_colitis_EUR	1	1	1	0	1	EBNA2_gain_loop	chr16	68561037	68565818	loop_2820
chr16	68564774	68564774	rs1645974	Systemic_lupus_erythematosus_AFR,Systemic_lupus_erythematosus_AMR,Systemic_lupus_erythematosus_EAS,Systemic_lupus_erythematosus_EUR,Ulcerative_colitis_EUR	1	1	1	0	1	EBNA2_gain_loop	chr16	68561037	68565818	loop_2820
chr16	68565296	68565296	rs11865339	Systemic_lupus_erythematosus_AFR,Systemic_lupus_erythematosus_AMR,Systemic_lupus_erythematosus_EAS,Systemic_lupus_erythematosus_EUR,Ulcerative_colitis_EUR	1	1	1	0	1	EBNA2_gain_loop	chr16	68561037	68565818	loop_2820
chr16	68565426	68565426	rs11647432	Systemic_lupus_erythematosus_AFR,Systemic_lupus_erythematosus_AMR,Systemic_lupus_erythematosus_EAS,Systemic_lupus_erythematosus_EUR,Ulcerative_colitis_EUR	1	1	1	0	1	EBNA2_gain_loop	chr16	68561037	68565818	loop_2820
chr16	68565604	68565604	rs7205960	Systemic_lupus_erythematosus_AFR,Systemic_lupus_erythematosus_AMR,Systemic_lupus_erythematosus_EAS,Systemic_lupus_erythematosus_EUR,Ulcerative_colitis_EUR	1	1	1	0	1	EBNA2_gain_loop	chr16	68561037	68565818	loop_2820
chr16	68565700	68565700	rs11075680	Systemic_lupus_erythematosus_AFR,Systemic_lupus_erythematosus_AMR,Systemic_lupus_erythematosus_EAS,Systemic_lupus_erythematosus_EUR,Ulcerative_colitis_EUR	1	1	1	0	1	EBNA2_gain_loop	chr16	68561037	68565818	loop_2820
chr16	68573064	68573064	rs1170445	Systemic_lupus_erythematosus_AFR,Systemic_lupus_erythematosus_AMR,Systemic_lupus_erythematosus_EAS,Systemic_lupus_erythematosus_EUR,Ulcerative_colitis_EUR	1	1	1	0	1	EBNA2_closed_chromatin	chr16	68572974	68573288	220
chr16	68573287	68573287	rs1170444	Systemic_lupus_erythematosus_AFR,Systemic_lupus_erythematosus_AMR,Systemic_lupus_erythematosus_EAS,Systemic_lupus_erythematosus_EUR,Ulcerative_colitis_EUR	1	1	1	0	1	EBNA2_closed_chromatin	chr16	68572974	68573288	220
chr16	69598657	69598657	rs62052821	Systolic_blood_pressure_AFR	0	0	0	0	0	EBNA2_gain_loop	chr16	69598078	69601991	loop_2823
chr16	69599495	69599495	rs2287970	Blood_urea_nitrogen_levels_EAS,Estimated_glomerular_filtration_rate_EAS	0	0	0	0	0	EBNA2_gain_loop	chr16	69598078	69601991	loop_2823
chr16	69599803	69599803	rs8048032	Chloride_levels_EAS,Serum_uric_acid_levels_EAS,Sodium_levels_EAS,Serum_uric_acid_levels_EUR,Urate_levels_EUR	0	0	0	0	0	EBNA2_gain_loop	chr16	69598078	69601991	loop_2823
chr16	69599949	69599949	rs149738655	Estimated_glomerular_filtration_rate_AMR,Blood_urea_nitrogen_levels_EAS,Estimated_glomerular_filtration_rate_EAS,Blood_protein_levels_EUR,Estimated_glomerular_filtration_rate_EUR	0	0	0	0	0	EBNA2_gain_loop	chr16	69598078	69601991	loop_2823
chr16	70463921	70463921	rs3852696	Branched_chain_amino_acid_levels__Isoleucine_EUR	0	0	0	0	0	EBNA2_gain_loop	chr16	70461461	70467951	loop_2825
chr16	70464818	70464818	rs11647932	Branched_chain_amino_acid_levels__Isoleucine_EUR	0	0	0	0	0	EBNA2_gain_loop	chr16	70461461	70467951	loop_2825
chr16	75589161	75589161	rs12598751	Age_of_smoking_initiation__MTAG_EUR,Smoking_initiation__ever_regular_vs_never_regular_EUR,Smoking_status__ever_vs_never_smokers_EUR	0	0	0	0	0	EBNA2_gain_loop	chr16	75588238	75591111	loop_2836
chr16	75589407	75589407	rs12599212	Age_of_smoking_initiation__MTAG_EUR,Smoking_initiation__ever_regular_vs_never_regular_EUR,Smoking_status__ever_vs_never_smokers_EUR	0	0	0	0	0	EBNA2_gain_loop	chr16	75588238	75591111	loop_2836
chr16	75590092	75590092	rs3743601	Age_of_smoking_initiation__MTAG_EUR,Smoking_status__ever_vs_never_smokers_EUR	0	0	0	0	0	EBNA2_gain_loop	chr16	75588238	75591111	loop_2836
chr16	84641905	84641905	rs2925049	Heel_bone_mineral_density_EUR	0	0	0	0	0	EBNA2_gain_loop	chr16	84640145	84642128	loop_2844
chr16	84641905	84641905	rs2925049	Heel_bone_mineral_density_EUR	0	0	0	0	0	EBNA2_loss_loop	chr16	84640145	84642128	loop_98
chr16	85292418	85292418	rs11863911	Male_pattern_baldness_EUR	0	0	0	0	0	EBNA2_gain_loop	chr16	85291924	85296224	loop_2848
chr16	85293187	85293187	rs67296788	Male_pattern_baldness_EUR	0	0	0	0	0	EBNA2_gain_loop	chr16	85291924	85296224	loop_2848
chr16	85293483	85293483	rs4258599	Male_pattern_baldness_EUR	0	0	0	0	0	EBNA2_gain_loop	chr16	85291924	85296224	loop_2848
chr16	85293507	85293507	rs8055650	Male_pattern_baldness_EUR	0	0	0	0	0	EBNA2_gain_loop	chr16	85291924	85296224	loop_2848
chr16	85294269	85294269	rs8062595	Male_pattern_baldness_EUR	0	0	0	0	0	EBNA2_gain_loop	chr16	85291924	85296224	loop_2848
chr16	85936978	85936978	rs305082	Granulocyte_count_EUR,Sum_neutrophil_eosinophil_counts_EUR	0	0	1	0	0	EBNA2_gain_loop	chr16	85936045	85938040	loop_2864
chr16	85977502	85977502	rs7202472	Monocyte_count_EAS,Systemic_lupus_erythematosus_EAS,Granulocyte_percentage_of_myeloid_white_cells_EUR,Monocyte_count_EUR,Monocyte_percentage_of_white_cells_EUR,Systemic_lupus_erythematosus_EUR,Systemic_lupus_erythematosus_and_Systemic_sclerosis_EUR	1	1	1	0	0	EBNA2_gain_loop	chr16	85976913	85982157	loop_2862
chr16	85980534	85980534	rs731708	Monocyte_count_EAS,Granulocyte_percentage_of_myeloid_white_cells_EUR,Monocyte_count_EUR,Monocyte_percentage_of_white_cells_EUR,Systemic_lupus_erythematosus_EUR,Systemic_lupus_erythematosus_and_Systemic_sclerosis_EUR	1	1	1	0	0	EBNA2_gain_loop	chr16	85976913	85982157	loop_2862
chr16	86021624	86021624	rs2139493	Rheumatoid_arthritis_EAS,Rheumatoid_arthritis__ACPA_positive_EAS,Rheumatoid_arthritis_EUR,Rheumatoid_arthritis__ACPA_positive_EUR	1	1	1	0	1	EBNA2_gain_loop	chr16	86020210	86023851	loop_2868
chr16	86021627	86021627	rs2139492	Rheumatoid_arthritis_EAS,Rheumatoid_arthritis__ACPA_positive_EAS	1	1	1	0	1	EBNA2_gain_loop	chr16	86020210	86023851	loop_2868
chr16	87876375	87876375	rs34508683	Blood_metabolite_levels_EUR	0	0	0	0	0	EBNA2_gain_loop	chr16	87875354	87878008	loop_2874
chr16	87876500	87876500	rs34380332	Blood_metabolite_levels_EUR	0	0	0	0	0	EBNA2_gain_loop	chr16	87875354	87878008	loop_2874
chr16	87876567	87876567	rs28684940	Blood_metabolite_levels_EUR	0	0	0	0	0	EBNA2_gain_loop	chr16	87875354	87878008	loop_2874
chr16	87876631	87876631	rs28609922	Blood_metabolite_levels_EUR	0	0	0	0	0	EBNA2_gain_loop	chr16	87875354	87878008	loop_2874
chr16	87876812	87876812	rs28611500	Blood_metabolite_levels_EUR	0	0	0	0	0	EBNA2_gain_loop	chr16	87875354	87878008	loop_2874
chr16	87877013	87877013	rs58267629	Blood_metabolite_levels_EUR	0	0	0	0	0	EBNA2_gain_loop	chr16	87875354	87878008	loop_2874
chr16	87877100	87877100	rs28582913	Blood_metabolite_levels_EUR	0	0	0	0	0	EBNA2_gain_loop	chr16	87875354	87878008	loop_2874
chr16	87877246	87877246	rs58852522	Blood_metabolite_levels_EUR	0	0	0	0	0	EBNA2_gain_loop	chr16	87875354	87878008	loop_2874
chr16	87877312	87877312	rs57455079	Blood_metabolite_levels_EUR	0	0	0	0	0	EBNA2_gain_loop	chr16	87875354	87878008	loop_2874
chr16	87877313	87877313	rs56722741	Blood_metabolite_levels_EUR	0	0	0	0	0	EBNA2_gain_loop	chr16	87875354	87878008	loop_2874
chr16	88772746	88772746	rs112070238	Feeling_fed_up_EUR	0	0	0	0	0	EBNA2_gain_loop	chr16	88772033	88774281	loop_2882
chr16	88773396	88773396	rs2340973	Plateletcrit_EUR	0	0	0	0	0	EBNA2_gain_loop	chr16	88772033	88774281	loop_2882
chr16	88858602	88858602	rs2926776	Glycated_hemoglobin_levels_EAS,Hemoglobin_A1c_levels_EAS,Mean_corpuscular_hemoglobin_concentration_EAS,Mean_corpuscular_volume_EAS,Glycated_hemoglobin_levels_EUR,Hematocrit_EUR,Hemoglobin_concentration_EUR,High_light_scatter_reticulocyte_count_EUR,High_light_scatter_reticulocyte_percentage_of_red_cells_EUR,Mean_corpuscular_hemoglobin_concentration_EUR,Mean_corpuscular_volume_EUR,Red_blood_cell_co…	0	0	0	0	0	EBNA2_gain_loop	chr16	88856733	88862614	loop_2884
chr16	88858646	88858646	rs2968478	Glycated_hemoglobin_levels_EAS,Hemoglobin_A1c_levels_EAS,Mean_corpuscular_hemoglobin_concentration_EAS,Mean_corpuscular_volume_EAS,Glycated_hemoglobin_levels_EUR,Hematocrit_EUR,Hemoglobin_concentration_EUR,High_light_scatter_reticulocyte_count_EUR,High_light_scatter_reticulocyte_percentage_of_red_cells_EUR,Mean_corpuscular_hemoglobin_concentration_EUR,Mean_corpuscular_volume_EUR,Red_blood_cell_co…	0	0	0	0	0	EBNA2_gain_loop	chr16	88856733	88862614	loop_2884
chr16	88862343	88862343	rs861400	Glycated_hemoglobin_levels_EAS,Hemoglobin_A1c_levels_EAS,Mean_corpuscular_hemoglobin_concentration_EAS,Mean_corpuscular_volume_EAS,Glycated_hemoglobin_levels_EUR,Hematocrit_EUR,Hemoglobin_concentration_EUR,High_light_scatter_reticulocyte_count_EUR,High_light_scatter_reticulocyte_percentage_of_red_cells_EUR,Mean_corpuscular_hemoglobin_concentration_EUR,Mean_corpuscular_volume_EUR,Red_blood_cell_co…	0	0	0	0	0	EBNA2_gain_loop	chr16	88856733	88862614	loop_2884
chr16	88862568	88862568	rs837756	Glycated_hemoglobin_levels_EAS,Hemoglobin_A1c_levels_EAS,Mean_corpuscular_hemoglobin_concentration_EAS,Mean_corpuscular_volume_EAS,Glycated_hemoglobin_levels_EUR,Hematocrit_EUR,Hemoglobin_concentration_EUR,High_light_scatter_reticulocyte_count_EUR,Mean_corpuscular_hemoglobin_concentration_EUR,Mean_corpuscular_volume_EUR,Red_blood_cell_count_EUR,Reticulocyte_count_EUR,Reticulocyte_fraction_of_red_…	0	0	0	0	0	EBNA2_gain_loop	chr16	88856733	88862614	loop_2884
chr16	89042615	89042615	rs7202173	Vitiligo_EUR	1	0	1	0	0	EBNA2_gain_loop	chr16	89040752	89047011	loop_2893
chr16	89042861	89042861	rs7188793	Vitiligo_EUR	1	0	1	0	0	EBNA2_gain_loop	chr16	89040752	89047011	loop_2893
chr16	89043454	89043454	rs117565673	Mean_corpuscular_hemoglobin_EUR	0	0	0	0	0	EBNA2_gain_loop	chr16	89040752	89047011	loop_2893
chr16	89044381	89044381	rs12927804	Vitiligo_EUR	1	0	1	0	0	EBNA2_gain_loop	chr16	89040752	89047011	loop_2893
chr16	89058129	89058129	rs113096685	Mean_corpuscular_hemoglobin_EUR	0	0	0	0	0	EBNA2_gain_loop	chr16	89057905	89062690	loop_2896
chr16	89105007	89105007	rs62045849	Mean_corpuscular_hemoglobin_EUR,Mean_corpuscular_volume_EUR,Red_blood_cell_count_EUR	0	0	0	0	0	EBNA2_gain_loop	chr16	89104602	89109517	loop_2893
chr16	89769725	89769725	rs34265416	Black_vs__red_hair_color_EUR,Homocysteine_levels_EUR	0	0	0	0	0	EBNA2_gain_loop	chr16	89767526	89770410	loop_2907
chr16	89938244	89938244	rs182948919	Blond_vs__brown_black_hair_color_EUR,Brown_vs__black_hair_color_EUR,Red_vs__brown_black_hair_color_EUR,Skin_colour_saturation_EUR	0	0	0	0	0	EBNA2_gain_loop	chr16	89938051	89941117	loop_2907
chr16	89939327	89939327	rs62056099	Skin_colour_saturation_EUR	0	0	0	0	0	EBNA2_gain_loop	chr16	89938051	89941117	loop_2907
chr16	89939753	89939753	rs62056100	Skin_colour_saturation_EUR	0	0	0	0	0	EBNA2_gain_loop	chr16	89938051	89941117	loop_2907
chr16	89939852	89939852	rs78336208	Skin_colour_saturation_EUR	0	0	0	0	0	EBNA2_gain_loop	chr16	89938051	89941117	loop_2907
chr16	89939929	89939929	rs9939914	Blond_vs__brown_black_hair_color_EUR,Brown_vs__black_hair_color_EUR,High_light_scatter_reticulocyte_count_EUR,High_light_scatter_reticulocyte_percentage_of_red_cells_EUR,Reticulocyte_count_EUR,Reticulocyte_fraction_of_red_cells_EUR	0	0	0	0	0	EBNA2_gain_loop	chr16	89938051	89941117	loop_2907
chr16	89940536	89940536	rs13333742	Skin_colour_saturation_EUR	0	0	0	0	0	EBNA2_gain_loop	chr16	89938051	89941117	loop_2907
chr16	89940608	89940608	rs74542234	Skin_colour_saturation_EUR	0	0	0	0	0	EBNA2_gain_loop	chr16	89938051	89941117	loop_2907
chr16	89941050	89941050	rs192131961	Blond_vs__brown_black_hair_color_EUR,Brown_vs__black_hair_color_EUR,Red_vs__brown_black_hair_color_EUR,Skin_colour_saturation_EUR	0	0	0	0	0	EBNA2_gain_loop	chr16	89938051	89941117	loop_2907
chr16	90020233	90020233	rs9929107	Blond_vs__brown_black_hair_color_EUR,Brown_vs__black_hair_color_EUR	0	0	0	0	0	EBNA2_gain_loop	chr16	90018522	90020502	loop_2909
chr17	2205923	2205923	rs2224770	Schizophrenia_EAS,Type_2_diabetes_EAS,Alcohol_consumption__drinks_per_week_EUR,Aortic_root_size_EUR,Autism_spectrum_disorder_or_schizophrenia_EUR,Coronary_heart_disease_EUR,Platelet_count_EUR,Plateletcrit_EUR,Schizophrenia_EUR	0	0	1	0	0	EBNA2_gain_loop	chr17	2205785	2208123	loop_2913
chr17	2207236	2207236	rs408067	Schizophrenia_EAS,Type_2_diabetes_EAS,Alcohol_consumption__drinks_per_week_EUR,Aortic_root_size_EUR,Autism_spectrum_disorder_or_schizophrenia_EUR,Platelet_count_EUR,Plateletcrit_EUR,Schizophrenia_EUR	0	0	1	0	0	EBNA2_gain_loop	chr17	2205785	2208123	loop_2913
chr17	2207326	2207326	rs3744270	Esophageal_cancer__squamous_cell_EAS,Cannabis_use_EUR,Male_pattern_baldness_EUR	0	0	0	0	0	EBNA2_gain_loop	chr17	2205785	2208123	loop_2913
chr17	2207425	2207425	rs12450028	Esophageal_cancer__squamous_cell_EAS,Cannabis_use_EUR,Male_pattern_baldness_EUR	0	0	0	0	0	EBNA2_gain_loop	chr17	2205785	2208123	loop_2913
chr17	3862909	3862909	rs12936332	Educational_attainment__MTAG_EUR	0	0	0	0	0	EBNA2_gain_loop	chr17	3862429	3868886	loop_2916
chr17	3864442	3864442	rs34400969	Educational_attainment__MTAG_EUR	0	0	0	0	0	EBNA2_gain_loop	chr17	3862429	3868886	loop_2916
chr17	3865399	3865399	rs1006703	Educational_attainment__MTAG_EUR	0	0	0	0	0	EBNA2_gain_loop	chr17	3862429	3868886	loop_2916
chr17	5135360	5135360	rs78534596	Alzheimer_s_disease_or_family_history_of_Alzheimer_s_disease_EUR	0	0	0	0	0	EBNA2_gain_loop	chr17	5135141	5139202	loop_2921
chr17	5136761	5136761	rs74859829	Rheumatoid_arthritis_EUR	1	1	1	0	1	EBNA2_gain_loop	chr17	5135141	5139202	loop_2921
chr17	5137047	5137047	rs7225151	Alzheimer_s_disease_or_family_history_of_Alzheimer_s_disease_EUR	0	0	0	0	0	EBNA2_gain_loop	chr17	5135141	5139202	loop_2921
chr17	5138304	5138304	rs75511804	Alzheimer_s_disease_or_family_history_of_Alzheimer_s_disease_EUR	0	0	0	0	0	EBNA2_gain_loop	chr17	5135141	5139202	loop_2921
chr17	5138304	5138304	rs75511804	Alzheimer_s_disease_or_family_history_of_Alzheimer_s_disease_EUR	0	0	0	0	0	EBNA2_down_genes	chr17	5137654	5138654	SCIMP
chr17	5138980	5138980	rs113260531	Alzheimer_s_disease_or_family_history_of_Alzheimer_s_disease_EUR	0	0	0	0	0	EBNA2_gain_loop	chr17	5135141	5139202	loop_2921
chr17	5323924	5323924	rs8078914	Menopause__age_at_onset_EUR	0	0	0	0	0	EBNA2_loss_loop	chr17	5321811	5325168	loop_101
chr17	5323989	5323989	rs8074617	Menopause__age_at_onset_EUR	0	0	0	0	0	EBNA2_loss_loop	chr17	5321811	5325168	loop_101
chr17	5324136	5324136	rs4605225	Menopause__age_at_onset_EUR	0	0	0	0	0	EBNA2_loss_loop	chr17	5321811	5325168	loop_101
chr17	5324207	5324207	rs4493114	Menopause__age_at_onset_EUR	0	0	0	0	0	EBNA2_loss_loop	chr17	5321811	5325168	loop_101
chr17	5324236	5324236	rs4442872	Menopause__age_at_onset_EUR	0	0	0	0	0	EBNA2_loss_loop	chr17	5321811	5325168	loop_101
chr17	5324406	5324406	rs4239056	Menopause__age_at_onset_EUR	0	0	0	0	0	EBNA2_loss_loop	chr17	5321811	5325168	loop_101
chr17	5324431	5324431	rs4578712	Menopause__age_at_onset_EUR	0	0	0	0	0	EBNA2_loss_loop	chr17	5321811	5325168	loop_101
chr17	5324588	5324588	rs4444392	Menopause__age_at_onset_EUR	0	0	0	0	0	EBNA2_loss_loop	chr17	5321811	5325168	loop_101
chr17	5324836	5324836	rs9303192	Menopause__age_at_onset_EUR	0	0	0	0	0	EBNA2_loss_loop	chr17	5321811	5325168	loop_101
chr17	5324893	5324893	rs4790770	Menopause__age_at_onset_EUR	0	0	0	0	0	EBNA2_loss_loop	chr17	5321811	5325168	loop_101
chr17	5324966	5324966	rs4790771	Menopause__age_at_onset_EUR	0	0	0	0	0	EBNA2_loss_loop	chr17	5321811	5325168	loop_101
chr17	6560578	6560578	rs3894313	Systolic_blood_pressure_EAS	0	0	0	0	0	EBNA2_closed_chromatin	chr17	6560504	6560732	242
chr17	6560578	6560578	rs3894313	Systolic_blood_pressure_EAS	0	0	0	0	0	EBNA2_down_genes	chr17	6560537	6561537	ALOX15P1
chr17	6560595	6560595	rs12103597	Systolic_blood_pressure_EAS	0	0	0	0	0	EBNA2_closed_chromatin	chr17	6560504	6560732	242
chr17	6560595	6560595	rs12103597	Systolic_blood_pressure_EAS	0	0	0	0	0	EBNA2_down_genes	chr17	6560537	6561537	ALOX15P1
chr17	6560596	6560596	rs12103854	Systolic_blood_pressure_EAS	0	0	0	0	0	EBNA2_closed_chromatin	chr17	6560504	6560732	242
chr17	6560596	6560596	rs12103854	Systolic_blood_pressure_EAS	0	0	0	0	0	EBNA2_down_genes	chr17	6560537	6561537	ALOX15P1
chr17	6560691	6560691	rs2309597	Systolic_blood_pressure_EAS	0	0	0	0	0	EBNA2_closed_chromatin	chr17	6560504	6560732	242
chr17	6560691	6560691	rs2309597	Systolic_blood_pressure_EAS	0	0	0	0	0	EBNA2_down_genes	chr17	6560537	6561537	ALOX15P1
chr17	6560693	6560693	rs2309598	Systolic_blood_pressure_EAS	0	0	0	0	0	EBNA2_closed_chromatin	chr17	6560504	6560732	242
chr17	6560693	6560693	rs2309598	Systolic_blood_pressure_EAS	0	0	0	0	0	EBNA2_down_genes	chr17	6560537	6561537	ALOX15P1
chr17	6560764	6560764	rs2309599	Systolic_blood_pressure_EAS	0	0	0	0	0	EBNA2_down_genes	chr17	6560537	6561537	ALOX15P1
chr17	6560860	6560860	rs2309600	Systolic_blood_pressure_EAS	0	0	0	0	0	EBNA2_down_genes	chr17	6560537	6561537	ALOX15P1
chr17	6560977	6560977	rs1808213	Systolic_blood_pressure_EAS	0	0	0	0	0	EBNA2_down_genes	chr17	6560537	6561537	ALOX15P1
chr17	6561192	6561192	rs1808214	Systolic_blood_pressure_EAS	0	0	0	0	0	EBNA2_down_genes	chr17	6560537	6561537	ALOX15P1
chr17	7122340	7122340	rs41283401	Metabolite_levels_EUR	0	0	0	0	0	EBNA2_gain_loop	chr17	7122082	7124873	loop_2923
chr17	7122828	7122828	rs41283403	Metabolite_levels_EUR	0	0	0	0	0	EBNA2_gain_loop	chr17	7122082	7124873	loop_2923
chr17	7142851	7142851	rs117616209	Metabolite_levels_EUR	0	0	0	0	0	EBNA2_gain_loop	chr17	7141268	7143290	loop_2924
chr17	7234112	7234112	rs3809822	Granulocyte_percentage_of_myeloid_white_cells_EUR,Monocyte_percentage_of_white_cells_EUR	0	0	1	0	0	EBNA2_gain_loop	chr17	7232139	7234906	loop_2924
chr17	7234299	7234299	rs3809823	Granulocyte_percentage_of_myeloid_white_cells_EUR,Monocyte_percentage_of_white_cells_EUR	0	0	1	0	0	EBNA2_gain_loop	chr17	7232139	7234906	loop_2924
chr17	7240391	7240391	rs61759532	Granulocyte_percentage_of_myeloid_white_cells_EUR,Monocyte_percentage_of_white_cells_EUR	0	0	1	0	0	EBNA2_gain_loop	chr17	7238292	7241635	loop_2927
chr17	17654319	17654319	rs11656775	Educational_attainment__years_of_education_EUR	0	0	0	0	0	EBNA2_loss_loop	chr17	17653811	17655310	loop_102
chr17	17654542	17654542	rs941448	Educational_attainment__years_of_education_EUR	0	0	0	0	0	EBNA2_loss_loop	chr17	17653811	17655310	loop_102
chr17	17660347	17660347	rs752579	Type_2_diabetes_EUR	0	0	1	0	0	EBNA2_gain_loop	chr17	17658968	17663196	loop_2935
chr17	17660347	17660347	rs752579	Type_2_diabetes_EUR	0	0	1	0	0	EBNA2_loss_loop	chr17	17658968	17663196	loop_102
chr17	17661802	17661802	rs4925109	Educational_attainment__years_of_education_EUR	0	0	0	0	0	EBNA2_gain_loop	chr17	17658968	17663196	loop_2935
chr17	17661802	17661802	rs4925109	Educational_attainment__years_of_education_EUR	0	0	0	0	0	EBNA2_loss_loop	chr17	17658968	17663196	loop_102
chr17	19146445	19146445	rs28550346	Educational_attainment__MTAG_EUR,Educational_attainment__years_of_education_EUR,Highest_math_class_taken__MTAG_EUR	0	0	0	0	0	EBNA2_gain_loop	chr17	19144849	19149215	loop_2936
chr17	19148305	19148305	rs4073003	Educational_attainment__MTAG_EUR,Educational_attainment__years_of_education_EUR,Highest_math_class_taken__MTAG_EUR	0	0	0	0	0	EBNA2_gain_loop	chr17	19144849	19149215	loop_2936
chr17	19912679	19912679	rs78532287	Schizophrenia_EAS	0	0	0	0	0	EBNA2_open_Chromatin	chr17	19912473	19913398	373
chr17	19912710	19912710	rs8067545	Educational_attainment__MTAG_EUR,Educational_attainment__years_of_education_EUR,Highest_math_class_taken__MTAG_EUR,Mean_corpuscular_hemoglobin_EUR,Mean_corpuscular_volume_EUR	0	0	0	0	0	EBNA2_open_Chromatin	chr17	19912473	19913398	373
chr17	27053176	27053176	rs114349053	Mean_corpuscular_hemoglobin_AFR	0	0	0	0	0	EBNA2_gain_loop	chr17	27052426	27057529	loop_2943
chr17	27055311	27055311	rs58413281	Mean_corpuscular_hemoglobin_AFR	0	0	0	0	0	EBNA2_gain_loop	chr17	27052426	27057529	loop_2943
chr17	27055440	27055440	rs7224640	Mean_corpuscular_hemoglobin_AFR	0	0	0	0	0	EBNA2_gain_loop	chr17	27052426	27057529	loop_2943
chr17	27056025	27056025	rs7211214	Mean_corpuscular_hemoglobin_AFR	0	0	0	0	0	EBNA2_gain_loop	chr17	27052426	27057529	loop_2943
chr17	27056026	27056026	rs7211220	Mean_corpuscular_hemoglobin_AFR	0	0	0	0	0	EBNA2_gain_loop	chr17	27052426	27057529	loop_2943
chr17	28049804	28049804	rs2617865	Coffee_consumption__cups_per_day_EUR,Lung_function__FEV1_FVC_EUR,Monocyte_count_EUR,Peak_expiratory_flow_EUR	0	0	1	0	0	EBNA2_open_Chromatin	chr17	28049697	28050232	262
chr17	28255827	28255827	rs11450521	Coffee_consumption__cups_per_day_EUR,Lung_function__FEV1_FVC_EUR,Monocyte_count_EUR,Peak_expiratory_flow_EUR	0	0	1	0	0	EBNA2_gain_loop	chr17	28254912	28259406	loop_2947
chr17	28256807	28256807	rs7209622	Coffee_consumption__cups_per_day_EUR,Lung_function__FEV1_FVC_EUR,Monocyte_count_EUR,Peak_expiratory_flow_EUR	0	0	1	0	0	EBNA2_gain_loop	chr17	28254912	28259406	loop_2947
chr17	28257626	28257626	rs5819876	Coffee_consumption__cups_per_day_EUR,Lung_function__FEV1_FVC_EUR,Monocyte_count_EUR,Peak_expiratory_flow_EUR	0	0	1	0	0	EBNA2_gain_loop	chr17	28254912	28259406	loop_2947
chr17	28257660	28257660	rs3936006	Coffee_consumption__cups_per_day_EUR,Lung_function__FEV1_FVC_EUR,Monocyte_count_EUR,Peak_expiratory_flow_EUR,QRS_complex__12_leadsum_EUR	0	0	1	0	0	EBNA2_gain_loop	chr17	28254912	28259406	loop_2947
chr17	28607766	28607766	rs35724800	Total_cholesterol_levels_AFR,Total_cholesterol_levels_AMR,Total_cholesterol_levels_EUR	0	0	0	0	0	EBNA2_loss_loop	chr17	28606770	28608076	loop_103
chr17	28648929	28648929	rs3103303	Total_cholesterol_levels_AFR,Total_cholesterol_levels_AMR	0	0	0	0	0	EBNA2_loss_loop	chr17	28648113	28652369	loop_103
chr17	28651363	28651363	rs3110454	Smoking_initiation__ever_regular_vs_never_regular___MTAG_EUR	0	0	0	0	0	EBNA2_loss_loop	chr17	28648113	28652369	loop_103
chr17	29057197	29057197	rs8075357	Body_mass_index_EAS,Mean_corpuscular_hemoglobin_EAS	0	0	0	0	0	EBNA2_loss_loop	chr17	29056864	29059968	loop_104
chr17	29057326	29057326	rs8075097	Body_mass_index_EAS,Mean_corpuscular_hemoglobin_EAS	0	0	0	0	0	EBNA2_loss_loop	chr17	29056864	29059968	loop_104
chr17	29057585	29057585	rs59447372	Body_mass_index_EAS,Mean_corpuscular_hemoglobin_EAS	0	0	0	0	0	EBNA2_loss_loop	chr17	29056864	29059968	loop_104
chr17	29057762	29057762	rs61643715	Body_mass_index_EAS,Mean_corpuscular_hemoglobin_EAS	0	0	0	0	0	EBNA2_loss_loop	chr17	29056864	29059968	loop_104
chr17	29058250	29058250	rs190899853	Body_mass_index_EAS,Mean_corpuscular_hemoglobin_EAS	0	0	0	0	0	EBNA2_loss_loop	chr17	29056864	29059968	loop_104
chr17	29058531	29058531	rs7224174	Body_mass_index_EAS,Mean_corpuscular_hemoglobin_EAS	0	0	0	0	0	EBNA2_loss_loop	chr17	29056864	29059968	loop_104
chr17	29058676	29058676	rs11650924	Body_mass_index_EAS,Mean_corpuscular_hemoglobin_EAS	0	0	0	0	0	EBNA2_loss_loop	chr17	29056864	29059968	loop_104
chr17	29058694	29058694	rs11650928	Body_mass_index_EAS,Mean_corpuscular_hemoglobin_EAS	0	0	0	0	0	EBNA2_loss_loop	chr17	29056864	29059968	loop_104
chr17	29058730	29058730	rs8080829	Body_mass_index_EAS,Mean_corpuscular_hemoglobin_EAS	0	0	0	0	0	EBNA2_loss_loop	chr17	29056864	29059968	loop_104
chr17	29058863	29058863	rs8079891	Body_mass_index_EAS,Mean_corpuscular_hemoglobin_EAS	0	0	0	0	0	EBNA2_loss_loop	chr17	29056864	29059968	loop_104
chr17	29059631	29059631	rs73267855	Body_mass_index_EAS,Mean_corpuscular_hemoglobin_EAS	0	0	0	0	0	EBNA2_loss_loop	chr17	29056864	29059968	loop_104
chr17	29059737	29059737	rs73267858	Body_mass_index_EAS,Mean_corpuscular_hemoglobin_EAS	0	0	0	0	0	EBNA2_loss_loop	chr17	29056864	29059968	loop_104
chr17	29059855	29059855	rs9904419	Waist_circumference_adjusted_for_body_mass_index_EAS	0	0	0	0	0	EBNA2_loss_loop	chr17	29056864	29059968	loop_104
chr17	29135293	29135293	rs11651622	Body_mass_index_EAS,Mean_corpuscular_hemoglobin_EAS	0	0	0	0	0	EBNA2_loss_loop	chr17	29135055	29137881	loop_104
chr17	29135345	29135345	rs8069821	Body_mass_index_EAS,Mean_corpuscular_hemoglobin_EAS	0	0	0	0	0	EBNA2_loss_loop	chr17	29135055	29137881	loop_104
chr17	29135594	29135594	rs8070182	Body_mass_index_EAS,Mean_corpuscular_hemoglobin_EAS	0	0	0	0	0	EBNA2_loss_loop	chr17	29135055	29137881	loop_104
chr17	29136426	29136426	rs11654035	Body_mass_index_EAS,Mean_corpuscular_hemoglobin_EAS	0	0	0	0	0	EBNA2_loss_loop	chr17	29135055	29137881	loop_104
chr17	29136468	29136468	rs11657369	Body_mass_index_EAS,Mean_corpuscular_hemoglobin_EAS	0	0	0	0	0	EBNA2_loss_loop	chr17	29135055	29137881	loop_104
chr17	29136565	29136565	rs8075341	Body_mass_index_EAS,Mean_corpuscular_hemoglobin_EAS	0	0	0	0	0	EBNA2_loss_loop	chr17	29135055	29137881	loop_104
chr17	29137155	29137155	rs73271842	Body_mass_index_EAS,Mean_corpuscular_hemoglobin_EAS	0	0	0	0	0	EBNA2_loss_loop	chr17	29135055	29137881	loop_104
chr17	29137678	29137678	rs62070638	Lung_function__FEV1_AMR,Lung_function__FEV1_EAS,Lung_function__FEV1_EUR	0	0	0	0	0	EBNA2_loss_loop	chr17	29135055	29137881	loop_104
chr17	30772577	30772577	rs9900089	Smoking_initiation__ever_regular_vs_never_regular_EUR,Smoking_initiation__ever_regular_vs_never_regular___MTAG_EUR,Systolic_blood_pressure_EUR	0	0	0	0	0	EBNA2_gain_loop	chr17	30770599	30773253	loop_2955
chr17	34091078	34091078	rs4795087	Blood_protein_levels_EUR	0	0	0	0	0	EBNA2_gain_loop	chr17	34090866	34093179	loop_2956
chr17	34134676	34134676	rs4251700	Reticulocyte_count_EUR,Reticulocyte_fraction_of_red_cells_EUR	0	0	0	0	0	EBNA2_gain_loop	chr17	34133064	34137435	loop_2956
chr17	34134958	34134958	rs4251703	Blood_protein_levels_EUR	0	0	0	0	0	EBNA2_gain_loop	chr17	34133064	34137435	loop_2956
chr17	34135492	34135492	rs77544741	Reticulocyte_count_EUR,Reticulocyte_fraction_of_red_cells_EUR	0	0	0	0	0	EBNA2_gain_loop	chr17	34133064	34137435	loop_2956
chr17	34136868	34136868	rs117281993	Reticulocyte_count_EUR,Reticulocyte_fraction_of_red_cells_EUR	0	0	0	0	0	EBNA2_gain_loop	chr17	34133064	34137435	loop_2956
chr17	34137179	34137179	rs78876505	Reticulocyte_count_EUR,Reticulocyte_fraction_of_red_cells_EUR	0	0	0	0	0	EBNA2_gain_loop	chr17	34133064	34137435	loop_2956
chr17	37393395	37393395	rs12950186	Lung_function__FVC_AMR,Creatinine_levels_EAS,Estimated_glomerular_filtration_rate_EAS,Glomerular_filtration_rate_EAS,Lung_function__FVC_EAS,Rheumatoid_arthritis_EAS,Spherical_equivalent_or_myopia__age_of_diagnosis_EAS,Glomerular_filtration_rate_in_non_diabetics__creatinine_EUR,Highest_math_class_taken__MTAG_EUR,Rheumatoid_arthritis_EUR	1	1	1	0	1	EBNA2_gain_loop	chr17	37392787	37395484	loop_2971
chr17	37793815	37793815	rs3817160	HDL_cholesterol_x_physical_activity_interaction__2df_test_AFR,HDL_cholesterol_levels_EAS,HDL_cholesterol_x_physical_activity_interaction__2df_test_EAS,High_density_lipoprotein_cholesterol_levels_EAS	0	0	0	0	0	EBNA2_gain_loop	chr17	37792017	37794925	loop_2973
chr17	37794351	37794351	rs4794817	HDL_cholesterol_levels_EAS,HDL_cholesterol_x_physical_activity_interaction__2df_test_EAS,High_density_lipoprotein_cholesterol_levels_EAS	0	0	0	0	0	EBNA2_gain_loop	chr17	37792017	37794925	loop_2973
chr17	37912377	37912377	rs12946510	Asthma__childhood_onset_AMR,Fractional_exhaled_nitric_oxide__childhood_AMR,Asthma__childhood_onset_EAS,Cervical_cancer_EAS,Lymphocyte_counts_EAS,Rheumatoid_arthritis__ACPA_positive_EAS,Allergic_rhinitis_EUR,Allergy_EUR,Asthma__childhood_onset_EUR,Asthma__moderate_or_severe_EUR,Asthma_onset__childhood_vs_adult_EUR,Atopic_march_EUR,Chronic_inflammatory_diseases__ankylosing_spondylitis__Crohn_s_dise…	1	1	1	1	1	EBNA2_allelic	chr17	37912376	37912377	rs12946510
chr17	38017065	38017065	rs9899006	Eosinophil_counts_EUR,Subcutaneous_adipose_tissue_EUR	0	0	1	0	0	EBNA2_gain_loop	chr17	38017047	38023357	loop_2977
chr17	38017313	38017313	rs60534400	Eosinophil_counts_EUR,Subcutaneous_adipose_tissue_EUR	0	0	1	0	0	EBNA2_gain_loop	chr17	38017047	38023357	loop_2977
chr17	38017780	38017780	rs9899336	Eosinophil_counts_EUR,Subcutaneous_adipose_tissue_EUR	0	0	1	0	0	EBNA2_gain_loop	chr17	38017047	38023357	loop_2977
chr17	38018774	38018774	rs9907096	Eosinophil_counts_EUR,Subcutaneous_adipose_tissue_EUR	0	0	1	0	0	EBNA2_gain_loop	chr17	38017047	38023357	loop_2977
chr17	38018803	38018803	rs9907966	Eosinophil_counts_EUR,Subcutaneous_adipose_tissue_EUR	0	0	1	0	0	EBNA2_gain_loop	chr17	38017047	38023357	loop_2977
chr17	38018955	38018955	rs9905881	Eosinophil_counts_EUR,Subcutaneous_adipose_tissue_EUR	0	0	1	0	0	EBNA2_gain_loop	chr17	38017047	38023357	loop_2977
chr17	38018967	38018967	rs9907564	Eosinophil_counts_EUR,Subcutaneous_adipose_tissue_EUR	0	0	1	0	0	EBNA2_gain_loop	chr17	38017047	38023357	loop_2977
chr17	38019026	38019026	rs9907794	Eosinophil_counts_EUR,Subcutaneous_adipose_tissue_EUR	0	0	1	0	0	EBNA2_gain_loop	chr17	38017047	38023357	loop_2977
chr17	38020058	38020058	rs35564481	Acute_lymphoblastic_leukemia__childhood_AMR,Asthma__childhood_onset_AMR,Fractional_exhaled_nitric_oxide__childhood_AMR,Asthma__childhood_onset_EAS,Cervical_cancer_EAS,Lymphocyte_counts_EAS,Rheumatoid_arthritis__ACPA_positive_EAS,Acute_lymphoblastic_leukemia__childhood_EUR,Allergic_disease__asthma__hay_fever_or_eczema_EUR,Allergic_rhinitis_EUR,Asthma_EUR,Asthma__childhood_onset_EUR,Asthma__moderat…	1	1	1	1	1	EBNA2_gain_loop	chr17	38017047	38023357	loop_2977
chr17	38020141	38020141	rs9635726	Primary_biliary_cholangitis_EAS	1	0	1	0	0	EBNA2_gain_loop	chr17	38017047	38023357	loop_2977
chr17	38020419	38020419	rs1453559	Acute_lymphoblastic_leukemia__childhood_AMR,Asthma__childhood_onset_AMR,Fractional_exhaled_nitric_oxide__childhood_AMR,Asthma__childhood_onset_EAS,Cervical_cancer_EAS,Lymphocyte_counts_EAS,Rheumatoid_arthritis__ACPA_positive_EAS,Acute_lymphoblastic_leukemia__childhood_EUR,Allergic_disease__asthma__hay_fever_or_eczema_EUR,Allergic_rhinitis_EUR,Asthma_EUR,Asthma__childhood_onset_EUR,Asthma__moderat…	1	1	1	1	1	EBNA2_gain_loop	chr17	38017047	38023357	loop_2977
chr17	38021117	38021117	rs111678394	Systemic_lupus_erythematosus_AFR,Eosinophil_counts_EUR,Subcutaneous_adipose_tissue_EUR	1	1	1	0	0	EBNA2_gain_loop	chr17	38017047	38023357	loop_2977
chr17	38022534	38022534	rs11284476	Eosinophil_counts_EUR,Subcutaneous_adipose_tissue_EUR	0	0	1	0	0	EBNA2_gain_loop	chr17	38017047	38023357	loop_2977
chr17	38023031	38023031	rs4622539	Eosinophil_counts_EUR,Subcutaneous_adipose_tissue_EUR	0	0	1	0	0	EBNA2_gain_loop	chr17	38017047	38023357	loop_2977
chr17	38118929	38118929	chr17_38118929	Systemic_sclerosis_EUR	1	1	1	0	0	EBNA2_down_genes	chr17	38118725	38119725	GSDMA
chr17	38119548	38119548	rs3902024	Hematological_parameters_EUR	0	0	0	0	0	EBNA2_down_genes	chr17	38118725	38119725	GSDMA
chr17	38119708	38119708	rs56396280	Hematological_parameters_EUR	0	0	0	0	0	EBNA2_down_genes	chr17	38118725	38119725	GSDMA
chr17	38770286	38770286	rs7221109	Allergic_disease__asthma__hay_fever_or_eczema_EUR,Asthma_or_allergic_disease__pleiotropy_EUR,Type_1_diabetes_EUR	1	0	1	1	0	EBNA2_gain_loop	chr17	38769833	38773443	loop_2982
chr17	38770641	38770641	rs11464691	Allergic_disease__asthma__hay_fever_or_eczema_EUR,Asthma_or_allergic_disease__pleiotropy_EUR,Type_1_diabetes_EUR	1	0	1	1	0	EBNA2_gain_loop	chr17	38769833	38773443	loop_2982
chr17	38771747	38771747	rs11388540	Allergic_disease__asthma__hay_fever_or_eczema_EUR,Asthma_or_allergic_disease__pleiotropy_EUR,Type_1_diabetes_EUR	1	0	1	1	0	EBNA2_gain_loop	chr17	38769833	38773443	loop_2982
chr17	39992659	39992659	rs11651225	High_light_scatter_reticulocyte_count_EUR,High_light_scatter_reticulocyte_percentage_of_red_cells_EUR,Immature_fraction_of_reticulocytes_EUR,Reticulocyte_count_EUR,Reticulocyte_fraction_of_red_cells_EUR	0	0	0	0	0	EBNA2_down_genes	chr17	39992022	39993022	NT5C3B
chr17	40611288	40611288	rs2301647	Type_2_diabetes_EAS	0	0	1	0	0	EBNA2_up_genes	chr17	40610361	40611361	ATP6V0A1
chr17	40769225	40769225	rs9674596	Type_2_diabetes_EAS	0	0	1	0	0	EBNA2_gain_loop	chr17	40769118	40772543	loop_2990
chr17	40769326	40769326	rs9674578	Type_2_diabetes_EAS	0	0	1	0	0	EBNA2_gain_loop	chr17	40769118	40772543	loop_2990
chr17	40770091	40770091	rs4792906	Type_2_diabetes_EAS	0	0	1	0	0	EBNA2_gain_loop	chr17	40769118	40772543	loop_2990
chr17	40771886	40771886	rs66767209	Heel_bone_mineral_density_EUR	0	0	0	0	0	EBNA2_gain_loop	chr17	40769118	40772543	loop_2990
chr17	40771994	40771994	rs1024091	Type_2_diabetes_EAS	0	0	1	0	0	EBNA2_gain_loop	chr17	40769118	40772543	loop_2990
chr17	40772236	40772236	rs2015328	Heel_bone_mineral_density_EUR	0	0	0	0	0	EBNA2_gain_loop	chr17	40769118	40772543	loop_2990
chr17	40772288	40772288	rs35635959	Type_2_diabetes_AFR,Type_2_diabetes_AMR,Type_2_diabetes_EAS,Type_2_diabetes_EUR	0	0	1	0	0	EBNA2_gain_loop	chr17	40769118	40772543	loop_2990
chr17	40772397	40772397	rs11649877	Type_2_diabetes_EAS	0	0	1	0	0	EBNA2_gain_loop	chr17	40769118	40772543	loop_2990
chr17	40772475	40772475	rs11079049	Heel_bone_mineral_density_EUR	0	0	0	0	0	EBNA2_gain_loop	chr17	40769118	40772543	loop_2990
chr17	40772503	40772503	rs12452131	Type_2_diabetes_EAS	0	0	1	0	0	EBNA2_gain_loop	chr17	40769118	40772543	loop_2990
chr17	40826525	40826525	rs35595844	Heel_bone_mineral_density_EUR	0	0	0	0	0	EBNA2_gain_loop	chr17	40825759	40832659	loop_2991
chr17	40828206	40828206	rs7218635	Heel_bone_mineral_density_EUR	0	0	0	0	0	EBNA2_gain_loop	chr17	40825759	40832659	loop_2991
chr17	40828929	40828929	chr17_40828929	Breast_cancer_EUR	0	0	0	0	0	EBNA2_gain_loop	chr17	40825759	40832659	loop_2991
chr17	40834073	40834073	rs12600469	Type_2_diabetes_EAS	0	0	1	0	0	EBNA2_up_genes	chr17	40833344	40834344	CCR10
chr17	41362272	41362272	rs748620	Menarche__age_at_onset_EAS,Menopause__age_at_onset_EAS	0	0	0	0	0	EBNA2_gain_loop	chr17	41362134	41365369	loop_2994
chr17	41362721	41362721	rs13119	Menarche__age_at_onset_EAS,Menopause__age_at_onset_EAS	0	0	0	0	0	EBNA2_gain_loop	chr17	41362134	41365369	loop_2994
chr17	41364910	41364910	rs3803871	Menarche__age_at_onset_EAS,Menopause__age_at_onset_EAS	0	0	0	0	0	EBNA2_gain_loop	chr17	41362134	41365369	loop_2994
chr17	41399445	41399445	rs35073256	Menarche__age_at_onset_EAS,Menopause__age_at_onset_EAS	0	0	0	0	0	EBNA2_gain_loop	chr17	41399431	41401882	loop_2996
chr17	41399932	41399932	rs2356308	Menarche__age_at_onset_EAS,Menopause__age_at_onset_EAS	0	0	0	0	0	EBNA2_closed_chromatin	chr17	41399684	41401247	823
chr17	41399932	41399932	rs2356308	Menarche__age_at_onset_EAS,Menopause__age_at_onset_EAS	0	0	0	0	0	EBNA2_closed_chromatin	chr17	41399676	41401247	823
chr17	41399932	41399932	rs2356308	Menarche__age_at_onset_EAS,Menopause__age_at_onset_EAS	0	0	0	0	0	EBNA2_gain_loop	chr17	41399431	41401882	loop_2996
chr17	41400913	41400913	rs1137525	Menarche__age_at_onset_EAS,Menopause__age_at_onset_EAS	0	0	0	0	0	EBNA2_closed_chromatin	chr17	41399684	41401247	823
chr17	41400913	41400913	rs1137525	Menarche__age_at_onset_EAS,Menopause__age_at_onset_EAS	0	0	0	0	0	EBNA2_closed_chromatin	chr17	41399676	41401247	823
chr17	41400913	41400913	rs1137525	Menarche__age_at_onset_EAS,Menopause__age_at_onset_EAS	0	0	0	0	0	EBNA2_gain_loop	chr17	41399431	41401882	loop_2996
chr17	41401482	41401482	rs2005942	Menarche__age_at_onset_EAS,Menopause__age_at_onset_EAS	0	0	0	0	0	EBNA2_gain_loop	chr17	41399431	41401882	loop_2996
chr17	41401570	41401570	rs1574328	Menarche__age_at_onset_EAS,Menopause__age_at_onset_EAS	0	0	0	0	0	EBNA2_gain_loop	chr17	41399431	41401882	loop_2996
chr17	41401582	41401582	rs1574329	Menarche__age_at_onset_EAS,Menopause__age_at_onset_EAS	0	0	0	0	0	EBNA2_gain_loop	chr17	41399431	41401882	loop_2996
chr17	41401730	41401730	rs111784069	Menarche__age_at_onset_EAS,Menopause__age_at_onset_EAS	0	0	0	0	0	EBNA2_gain_loop	chr17	41399431	41401882	loop_2996
chr17	41401733	41401733	rs111535713	Menarche__age_at_onset_EAS,Menopause__age_at_onset_EAS	0	0	0	0	0	EBNA2_gain_loop	chr17	41399431	41401882	loop_2996
chr17	41445145	41445145	rs9912203	Menarche__age_at_onset_EAS,Menopause__age_at_onset_EAS	0	0	0	0	0	EBNA2_gain_loop	chr17	41444775	41447203	loop_2996
chr17	41445410	41445410	rs34474989	Menarche__age_at_onset_EAS,Menopause__age_at_onset_EAS	0	0	0	0	0	EBNA2_gain_loop	chr17	41444775	41447203	loop_2996
chr17	41445459	41445459	rs199735290	Menarche__age_at_onset_EAS,Menopause__age_at_onset_EAS	0	0	0	0	0	EBNA2_gain_loop	chr17	41444775	41447203	loop_2996
chr17	41445460	41445460	rs116409325	Menarche__age_at_onset_EAS,Menopause__age_at_onset_EAS	0	0	0	0	0	EBNA2_gain_loop	chr17	41444775	41447203	loop_2996
chr17	41445462	41445462	rs201521196	Menarche__age_at_onset_EAS,Menopause__age_at_onset_EAS	0	0	0	0	0	EBNA2_gain_loop	chr17	41444775	41447203	loop_2996
chr17	42201041	42201041	rs112114764	Femoral_neck_bone_mineral_density_EAS,Femoral_neck_bone_mineral_density_EUR	0	0	0	0	0	EBNA2_gain_loop	chr17	42199717	42202423	loop_2999
chr17	42201956	42201956	rs4793079	Femoral_neck_bone_mineral_density_EAS,Femoral_neck_bone_mineral_density_EUR	0	0	0	0	0	EBNA2_gain_loop	chr17	42199717	42202423	loop_2999
chr17	42294198	42294198	rs2269908	Mean_corpuscular_hemoglobin_concentration_AFR,Mean_corpuscular_hemoglobin_concentration_EAS,Body_fat_percentage_EUR,Diverticular_disease_EUR,Educational_attainment__years_of_education_EUR,Mean_corpuscular_hemoglobin_concentration_EUR	0	0	0	0	0	EBNA2_gain_loop	chr17	42293324	42297805	loop_2999
chr17	42294215	42294215	rs2269907	Mean_corpuscular_hemoglobin_concentration_AFR,Mean_corpuscular_hemoglobin_concentration_EAS,Body_fat_percentage_EUR,Diverticular_disease_EUR,Educational_attainment__years_of_education_EUR,Mean_corpuscular_hemoglobin_concentration_EUR	0	0	0	0	0	EBNA2_gain_loop	chr17	42293324	42297805	loop_2999
chr17	42294337	42294337	rs2269906	Mean_corpuscular_hemoglobin_concentration_AFR,Mean_corpuscular_hemoglobin_concentration_EAS,Body_fat_percentage_EUR,Diverticular_disease_EUR,Educational_attainment__years_of_education_EUR,Mean_corpuscular_hemoglobin_concentration_EUR	0	0	0	0	0	EBNA2_gain_loop	chr17	42293324	42297805	loop_2999
chr17	42294462	42294462	rs2269905	Mean_corpuscular_hemoglobin_concentration_AFR,Mean_corpuscular_hemoglobin_concentration_EAS,Body_fat_percentage_EUR,Diverticular_disease_EUR,Educational_attainment__years_of_education_EUR,Mean_corpuscular_hemoglobin_concentration_EUR	0	0	0	0	0	EBNA2_gain_loop	chr17	42293324	42297805	loop_2999
chr17	42294722	42294722	rs8072954	Mean_corpuscular_hemoglobin_concentration_AFR,Mean_corpuscular_hemoglobin_concentration_EAS,Body_fat_percentage_EUR,Diverticular_disease_EUR,Educational_attainment__years_of_education_EUR,Mean_corpuscular_hemoglobin_concentration_EUR	0	0	0	0	0	EBNA2_gain_loop	chr17	42293324	42297805	loop_2999
chr17	42297453	42297453	rs372844914	Body_fat_percentage_EUR,Diverticular_disease_EUR,Educational_attainment__years_of_education_EUR,Mean_corpuscular_hemoglobin_concentration_EUR	0	0	0	0	0	EBNA2_gain_loop	chr17	42293324	42297805	loop_2999
chr17	42297631	42297631	rs113844752	Body_fat_percentage_EUR,Diverticular_disease_EUR,Educational_attainment__years_of_education_EUR,Mean_corpuscular_hemoglobin_concentration_EUR	0	0	0	0	0	EBNA2_gain_loop	chr17	42293324	42297805	loop_2999
chr17	43223292	43223292	rs9894577	Pulse_pressure_EAS,Systolic_blood_pressure_EAS,Height_EUR	0	0	0	0	0	EBNA2_gain_loop	chr17	43223152	43227120	loop_3005
chr17	43223316	43223316	rs112981250	Pulse_pressure_EAS,Systolic_blood_pressure_EAS,Height_EUR	0	0	0	0	0	EBNA2_gain_loop	chr17	43223152	43227120	loop_3005
chr17	43226887	43226887	rs12051846	Pulse_pressure_AMR,Systolic_blood_pressure_AMR,Pulse_pressure_EAS,Systolic_blood_pressure_EAS,Male_pattern_baldness_EUR	0	0	0	0	0	EBNA2_gain_loop	chr17	43223152	43227120	loop_3005
chr17	43302259	43302259	rs12449792	Hypothyroidism_EUR	0	0	0	0	0	EBNA2_gain_loop	chr17	43300108	43306906	loop_3005
chr17	43487217	43487217	rs36078910	Red_blood_cell_count_EAS,Cognitive_performance_EUR,Cognitive_performance__MTAG_EUR,Epithelial_ovarian_cancer_EUR,High_grade_serous_ovarian_cancer_EUR,Invasive_epithelial_ovarian_cancer_EUR,Self_reported_math_ability__MTAG_EUR,Serous_invasive_ovarian_cancer_EUR	0	0	0	0	0	EBNA2_gain_loop	chr17	43485848	43489998	loop_3007
chr17	43487424	43487424	rs35389313	Red_blood_cell_count_EAS,Cognitive_performance_EUR,Cognitive_performance__MTAG_EUR,Epithelial_ovarian_cancer_EUR,High_grade_serous_ovarian_cancer_EUR,Invasive_epithelial_ovarian_cancer_EUR,Self_reported_math_ability__MTAG_EUR,Serous_invasive_ovarian_cancer_EUR	0	0	0	0	0	EBNA2_gain_loop	chr17	43485848	43489998	loop_3007
chr17	43487574	43487574	rs35327136	Red_blood_cell_count_EAS,Cognitive_performance_EUR,Cognitive_performance__MTAG_EUR,Epithelial_ovarian_cancer_EUR,High_grade_serous_ovarian_cancer_EUR,Invasive_epithelial_ovarian_cancer_EUR,Self_reported_math_ability__MTAG_EUR,Serous_invasive_ovarian_cancer_EUR	0	0	0	0	0	EBNA2_gain_loop	chr17	43485848	43489998	loop_3007
chr17	43488382	43488382	rs8071011	Cognitive_performance_EUR,Cognitive_performance__MTAG_EUR,Epithelial_ovarian_cancer_EUR,High_grade_serous_ovarian_cancer_EUR,Invasive_epithelial_ovarian_cancer_EUR,Self_reported_math_ability__MTAG_EUR,Serous_invasive_ovarian_cancer_EUR	0	0	0	0	0	EBNA2_gain_loop	chr17	43485848	43489998	loop_3007
chr17	43488792	43488792	rs62064641	Red_blood_cell_count_EAS,Cognitive_performance_EUR,Cognitive_performance__MTAG_EUR,Epithelial_ovarian_cancer_EUR,High_grade_serous_ovarian_cancer_EUR,Invasive_epithelial_ovarian_cancer_EUR,Self_reported_math_ability__MTAG_EUR,Serous_invasive_ovarian_cancer_EUR	0	0	0	0	0	EBNA2_gain_loop	chr17	43485848	43489998	loop_3007
chr17	43489161	43489161	chr17_43489161	Red_blood_cell_count_EAS,Cognitive_performance_EUR,Cognitive_performance__MTAG_EUR,Epithelial_ovarian_cancer_EUR,High_grade_serous_ovarian_cancer_EUR,Invasive_epithelial_ovarian_cancer_EUR,Self_reported_math_ability__MTAG_EUR,Serous_invasive_ovarian_cancer_EUR	0	0	0	0	0	EBNA2_gain_loop	chr17	43485848	43489998	loop_3007
chr17	43489161	43489161	rs111443054	Heel_bone_mineral_density_EUR	0	0	0	0	0	EBNA2_gain_loop	chr17	43485848	43489998	loop_3007
chr17	43660209	43660209	chr17_43660209	Red_blood_cell_count_EAS,Hand_grip_strength_EUR	0	0	0	0	0	EBNA2_gain_loop	chr17	43660112	43663772	loop_3007
chr17	43661378	43661378	chr17_43661378	Red_blood_cell_count_EAS	0	0	0	0	0	EBNA2_gain_loop	chr17	43660112	43663772	loop_3007
chr17	43661751	43661751	rs2693359	Red_blood_cell_count_EAS	0	0	0	0	0	EBNA2_gain_loop	chr17	43660112	43663772	loop_3007
chr17	43661801	43661801	chr17_43661801	Red_blood_cell_count_EAS	0	0	0	0	0	EBNA2_gain_loop	chr17	43660112	43663772	loop_3007
chr17	43661959	43661959	chr17_43661959	Red_blood_cell_count_EAS	0	0	0	0	0	EBNA2_gain_loop	chr17	43660112	43663772	loop_3007
chr17	43662020	43662020	chr17_43662020	Red_blood_cell_count_EAS	0	0	0	0	0	EBNA2_gain_loop	chr17	43660112	43663772	loop_3007
chr17	43663169	43663169	chr17_43663169	Red_blood_cell_count_EAS,Accelerometer_based_physical_activity_measurement__average_acceleration_EUR,Alcohol_consumption__drinks_per_week_EUR,Alcohol_use_disorder__consumption_score_EUR,Alcohol_use_disorder__total_score_EUR,Automobile_speeding_propensity_EUR,Breast_cancer_EUR,Cognitive_ability_EUR,Cognitive_ability__MTAG_EUR,Depressed_affect_EUR,Educational_attainment__MTAG_EUR,Educational_attain…	1	0	1	0	0	EBNA2_gain_loop	chr17	43660112	43663772	loop_3007
chr17	43663213	43663213	chr17_43663213	Accelerometer_based_physical_activity_measurement__average_acceleration_EUR,Alcohol_consumption__drinks_per_week_EUR,Alcohol_use_disorder__consumption_score_EUR,Alcohol_use_disorder__total_score_EUR,Automobile_speeding_propensity_EUR,Breast_cancer_EUR,Cognitive_ability_EUR,Cognitive_ability__MTAG_EUR,Depressed_affect_EUR,Educational_attainment__MTAG_EUR,Educational_attainment__years_of_education_…	1	0	1	0	0	EBNA2_gain_loop	chr17	43660112	43663772	loop_3007
chr17	43663247	43663247	rs1724390	Red_blood_cell_count_EAS,Accelerometer_based_physical_activity_measurement__average_acceleration_EUR,Alcohol_consumption__drinks_per_week_EUR,Alcohol_use_disorder__consumption_score_EUR,Alcohol_use_disorder__total_score_EUR,Automobile_speeding_propensity_EUR,Breast_cancer_EUR,Cognitive_ability_EUR,Cognitive_ability__MTAG_EUR,Depressed_affect_EUR,Educational_attainment__MTAG_EUR,Educational_attain…	1	0	1	0	0	EBNA2_gain_loop	chr17	43660112	43663772	loop_3007
chr17	43663455	43663455	chr17_43663455	Accelerometer_based_physical_activity_measurement__average_acceleration_EUR,Alcohol_consumption__drinks_per_week_EUR,Alcohol_use_disorder__consumption_score_EUR,Alcohol_use_disorder__total_score_EUR,Automobile_speeding_propensity_EUR,Breast_cancer_EUR,Cognitive_ability_EUR,Cognitive_ability__MTAG_EUR,Depressed_affect_EUR,Educational_attainment__MTAG_EUR,Educational_attainment__years_of_education_…	1	0	1	0	0	EBNA2_gain_loop	chr17	43660112	43663772	loop_3007
chr17	45741016	45741016	rs9905583	HDL_cholesterol_AMR,LDL_cholesterol_x_physical_activity_interaction__2df_test_AMR,Low_density_lipoprotein_cholesterol_levels_AMR,Total_cholesterol_levels_AMR,LDL_cholesterol_x_physical_activity_interaction__2df_test_EAS,Low_density_lipoprotein_cholesterol_levels_EAS,Total_cholesterol_levels_EAS,Ankylosing_spondylitis_EUR,Cholesterol__total_EUR,Chronic_inflammatory_diseases__ankylosing_spondylitis…	1	1	1	0	1	EBNA2_gain_loop	chr17	45740980	45742673	loop_3010
chr17	45769236	45769236	rs4794052	Body_mass_index_AMR	0	0	0	0	0	EBNA2_gain_loop	chr17	45769175	45772914	loop_3010
chr17	45769551	45769551	rs4794053	Body_mass_index_AMR	0	0	0	0	0	EBNA2_gain_loop	chr17	45769175	45772914	loop_3010
chr17	45771015	45771015	chr17_45771015	Body_mass_index_AMR	0	0	0	0	0	EBNA2_gain_loop	chr17	45769175	45772914	loop_3010
chr17	45771037	45771037	rs8075566	Body_mass_index_AMR	0	0	0	0	0	EBNA2_gain_loop	chr17	45769175	45772914	loop_3010
chr17	45771816	45771816	rs62074054	Body_mass_index_AMR	0	0	0	0	0	EBNA2_gain_loop	chr17	45769175	45772914	loop_3010
chr17	45771873	45771873	rs67919208	HDL_cholesterol_EUR	0	0	0	0	0	EBNA2_gain_loop	chr17	45769175	45772914	loop_3010
chr17	45771933	45771933	rs62074055	LDL_cholesterol_x_physical_activity_interaction__2df_test_EAS,HDL_cholesterol_EUR,LDL_cholesterol_x_physical_activity_interaction__2df_test_EUR,Optic_cup_area_EUR	0	0	0	0	0	EBNA2_gain_loop	chr17	45769175	45772914	loop_3010
chr17	45772447	45772447	rs6503804	Body_mass_index_AMR	0	0	0	0	0	EBNA2_gain_loop	chr17	45769175	45772914	loop_3010
chr17	45772447	45772447	rs6503804	Body_mass_index_AMR	0	0	0	0	0	EBNA2_down_genes	chr17	45772129	45773129	TBKBP1
chr17	45772932	45772932	rs6503807	Body_mass_index_AMR	0	0	0	0	0	EBNA2_down_genes	chr17	45772129	45773129	TBKBP1
chr17	46114692	46114692	rs41280120	Intelligence_EUR	0	0	0	0	0	EBNA2_up_genes	chr17	46114667	46115667	COPZ2
chr17	47465743	47465743	rs10667251	Asthma__adult_onset_EUR,Sum_eosinophil_basophil_counts_EUR	0	0	1	1	0	EBNA2_gain_loop	chr17	47464441	47469413	loop_3012
chr17	47468011	47468011	rs2671654	Asthma__adult_onset_EUR,Sum_eosinophil_basophil_counts_EUR	0	0	1	1	0	EBNA2_gain_loop	chr17	47464441	47469413	loop_3012
chr17	47468964	47468964	rs5820758	Asthma__adult_onset_EUR,Sum_eosinophil_basophil_counts_EUR	0	0	1	1	0	EBNA2_gain_loop	chr17	47464441	47469413	loop_3012
chr17	47469186	47469186	rs2412099	Asthma__adult_onset_EUR,Sum_eosinophil_basophil_counts_EUR	0	0	1	1	0	EBNA2_gain_loop	chr17	47464441	47469413	loop_3012
chr17	55630186	55630186	rs186727524	Myopia__age_of_diagnosis_EUR	0	0	0	0	0	EBNA2_gain_loop	chr17	55627489	55631461	loop_3023
chr17	55742036	55742036	rs34888090	Schizophrenia_EUR	0	0	0	0	0	EBNA2_gain_loop	chr17	55741904	55743336	loop_3025
chr17	55743277	55743277	rs12938078	Schizophrenia_EUR	0	0	0	0	0	EBNA2_gain_loop	chr17	55741904	55743336	loop_3025
chr17	56409089	56409089	rs2632516	Alzheimer_s_disease_AFR,Alzheimer_s_disease_EUR,Alzheimer_s_disease__late_onset_EUR,Monocyte_count_EUR,Plateletcrit_EUR	0	0	1	0	0	EBNA2_gain_loop	chr17	56408579	56415911	loop_3027
chr17	56410041	56410041	rs2526377	Alzheimer_s_disease_EUR,Alzheimer_s_disease__late_onset_EUR,Monocyte_count_EUR,Plateletcrit_EUR	0	0	1	0	0	EBNA2_gain_loop	chr17	56408579	56415911	loop_3027
chr17	56413635	56413635	rs75394768	Granulocyte_percentage_of_myeloid_white_cells_EUR,Monocyte_count_EUR,Monocyte_percentage_of_white_cells_EUR,Neutrophil_percentage_of_white_cells_EUR	0	0	1	0	0	EBNA2_gain_loop	chr17	56408579	56415911	loop_3027
chr17	56492800	56492800	rs3744093	Intelligence_EUR,Intelligence__MTAG_EUR	0	0	0	0	0	EBNA2_gain_loop	chr17	56490937	56495388	loop_3027
chr17	56492800	56492800	rs3744093	Intelligence_EUR,Intelligence__MTAG_EUR	0	0	0	0	0	EBNA2_loss_loop	chr17	56490937	56495388	loop_107
chr17	56594197	56594197	rs3744109	Cognitive_performance_EUR,General_cognitive_ability_EUR,Intelligence_EUR,Intelligence__MTAG_EUR	0	0	0	0	0	EBNA2_loss_loop	chr17	56593570	56597425	loop_107
chr17	56594460	56594460	rs11079354	Cognitive_performance_EUR,General_cognitive_ability_EUR,Intelligence_EUR,Intelligence__MTAG_EUR	0	0	0	0	0	EBNA2_loss_loop	chr17	56593570	56597425	loop_107
chr17	61818390	61818390	rs8066463	Height_AFR,Height_EAS	0	0	0	0	0	EBNA2_gain_loop	chr17	61818004	61821613	loop_3035
chr17	61818485	61818485	rs138833338	Height_AFR,Height_EAS	0	0	0	0	0	EBNA2_gain_loop	chr17	61818004	61821613	loop_3035
chr17	61819222	61819222	rs3826341	Self_reported_math_ability__MTAG_EUR	0	0	0	0	0	EBNA2_gain_loop	chr17	61818004	61821613	loop_3035
chr17	61819680	61819680	chr17_61819680	Height_EAS	0	0	0	0	0	EBNA2_gain_loop	chr17	61818004	61821613	loop_3035
chr17	61819960	61819960	rs1877318	Self_reported_math_ability__MTAG_EUR	0	0	0	0	0	EBNA2_gain_loop	chr17	61818004	61821613	loop_3035
chr17	61820391	61820391	rs368302294	Self_reported_math_ability__MTAG_EUR	0	0	0	0	0	EBNA2_gain_loop	chr17	61818004	61821613	loop_3035
chr17	61820902	61820902	rs11079510	Self_reported_math_ability__MTAG_EUR	0	0	0	0	0	EBNA2_gain_loop	chr17	61818004	61821613	loop_3035
chr17	61821161	61821161	rs3760256	Self_reported_math_ability__MTAG_EUR	0	0	0	0	0	EBNA2_gain_loop	chr17	61818004	61821613	loop_3035
chr17	61821209	61821209	rs3760255	Height_AFR,Height_EAS	0	0	0	0	0	EBNA2_gain_loop	chr17	61818004	61821613	loop_3035
chr17	61919643	61919643	rs28463311	Height_EUR,Hip_circumference_adjusted_for_BMI_EUR	0	0	0	0	0	EBNA2_gain_loop	chr17	61918086	61922175	loop_3035
chr17	61919723	61919723	rs2665799	Height_AFR,Height_EAS	0	0	0	0	0	EBNA2_gain_loop	chr17	61918086	61922175	loop_3035
chr17	61920497	61920497	rs8076760	Self_reported_math_ability__MTAG_EUR	0	0	0	0	0	EBNA2_gain_loop	chr17	61918086	61922175	loop_3035
chr17	61920891	61920891	rs2002772	Self_reported_math_ability__MTAG_EUR	0	0	0	0	0	EBNA2_gain_loop	chr17	61918086	61922175	loop_3035
chr17	61921397	61921397	rs2665798	Self_reported_math_ability__MTAG_EUR	0	0	0	0	0	EBNA2_gain_loop	chr17	61918086	61922175	loop_3035
chr17	61921706	61921706	rs2727322	Self_reported_math_ability__MTAG_EUR	0	0	0	0	0	EBNA2_gain_loop	chr17	61918086	61922175	loop_3035
chr17	61921999	61921999	rs2727323	Self_reported_math_ability__MTAG_EUR	0	0	0	0	0	EBNA2_gain_loop	chr17	61918086	61922175	loop_3035
chr17	61922102	61922102	rs2727324	Height_EAS	0	0	0	0	0	EBNA2_gain_loop	chr17	61918086	61922175	loop_3035
chr17	61998879	61998879	rs2040347	Fat_free_mass_EUR,Height_EUR	0	0	0	0	0	EBNA2_gain_loop	chr17	61997700	62000784	loop_3038
chr17	62158278	62158278	rs196951	Chronic_inflammatory_diseases__ankylosing_spondylitis__Crohn_s_disease__psoriasis__primary_sclerosing_cholangitis__ulcerative_colitis___pleiotropy_EUR	1	1	1	0	1	EBNA2_gain_loop	chr17	62158165	62161056	loop_3040
chr17	62158300	62158300	rs196952	Chronic_inflammatory_diseases__ankylosing_spondylitis__Crohn_s_disease__psoriasis__primary_sclerosing_cholangitis__ulcerative_colitis___pleiotropy_EUR	1	1	1	0	1	EBNA2_gain_loop	chr17	62158165	62161056	loop_3040
chr17	62158319	62158319	rs196953	Chronic_inflammatory_diseases__ankylosing_spondylitis__Crohn_s_disease__psoriasis__primary_sclerosing_cholangitis__ulcerative_colitis___pleiotropy_EUR	1	1	1	0	1	EBNA2_gain_loop	chr17	62158165	62161056	loop_3040
chr17	62158623	62158623	rs196954	Chronic_inflammatory_diseases__ankylosing_spondylitis__Crohn_s_disease__psoriasis__primary_sclerosing_cholangitis__ulcerative_colitis___pleiotropy_EUR	1	1	1	0	1	EBNA2_gain_loop	chr17	62158165	62161056	loop_3040
chr17	62158716	62158716	rs196955	Chronic_inflammatory_diseases__ankylosing_spondylitis__Crohn_s_disease__psoriasis__primary_sclerosing_cholangitis__ulcerative_colitis___pleiotropy_EUR	1	1	1	0	1	EBNA2_gain_loop	chr17	62158165	62161056	loop_3040
chr17	62159608	62159608	rs1971298	Chronic_inflammatory_diseases__ankylosing_spondylitis__Crohn_s_disease__psoriasis__primary_sclerosing_cholangitis__ulcerative_colitis___pleiotropy_EUR	1	1	1	0	1	EBNA2_gain_loop	chr17	62158165	62161056	loop_3040
chr17	62160044	62160044	rs3744284	Chronic_inflammatory_diseases__ankylosing_spondylitis__Crohn_s_disease__psoriasis__primary_sclerosing_cholangitis__ulcerative_colitis___pleiotropy_EUR	1	1	1	0	1	EBNA2_gain_loop	chr17	62158165	62161056	loop_3040
chr17	62160382	62160382	rs6504199	Chronic_inflammatory_diseases__ankylosing_spondylitis__Crohn_s_disease__psoriasis__primary_sclerosing_cholangitis__ulcerative_colitis___pleiotropy_EUR	1	1	1	0	1	EBNA2_gain_loop	chr17	62158165	62161056	loop_3040
chr17	62160439	62160439	rs6504200	Chronic_inflammatory_diseases__ankylosing_spondylitis__Crohn_s_disease__psoriasis__primary_sclerosing_cholangitis__ulcerative_colitis___pleiotropy_EUR	1	1	1	0	1	EBNA2_gain_loop	chr17	62158165	62161056	loop_3040
chr17	62160827	62160827	rs6504201	Chronic_inflammatory_diseases__ankylosing_spondylitis__Crohn_s_disease__psoriasis__primary_sclerosing_cholangitis__ulcerative_colitis___pleiotropy_EUR	1	1	1	0	1	EBNA2_gain_loop	chr17	62158165	62161056	loop_3040
chr17	62161032	62161032	rs8079000	Chronic_inflammatory_diseases__ankylosing_spondylitis__Crohn_s_disease__psoriasis__primary_sclerosing_cholangitis__ulcerative_colitis___pleiotropy_EUR	1	1	1	0	1	EBNA2_gain_loop	chr17	62158165	62161056	loop_3040
chr17	65989961	65989961	rs7502307	Triglycerides_AFR,Triglycerides_AMR,Body_mass_index_EAS,EGFR_mutation_positive_lung_adenocarcinoma_EAS,Body_fat_percentage_EUR,Body_mass_index_EUR,Eosinophil_percentage_of_granulocytes_EUR,Eosinophil_percentage_of_white_cells_EUR,HDL_cholesterol_EUR,Hand_grip_strength_EUR,Macular_thickness_EUR,Neutrophil_percentage_of_granulocytes_EUR,Number_of_sexual_partners_EUR,Triglycerides_EUR	0	0	1	0	0	EBNA2_down_genes	chr17	65989264	65990264	C17ORF58
chr17	65989971	65989971	rs113985803	HDL_cholesterol_AMR,Triglycerides_AMR,Body_mass_index_EAS,EGFR_mutation_positive_lung_adenocarcinoma_EAS,Body_fat_percentage_EUR,Body_mass_index_EUR,Eosinophil_percentage_of_granulocytes_EUR,Eosinophil_percentage_of_white_cells_EUR,HDL_cholesterol_EUR,Hand_grip_strength_EUR,Macular_thickness_EUR,Neutrophil_percentage_of_granulocytes_EUR,Number_of_sexual_partners_EUR,Triglycerides_EUR	0	0	1	0	0	EBNA2_down_genes	chr17	65989264	65990264	C17ORF58
chr17	66457658	66457658	rs2909211	Reticulocyte_count_EUR,Reticulocyte_fraction_of_red_cells_EUR	0	0	0	0	0	EBNA2_gain_loop	chr17	66456610	66460599	loop_3047
chr17	66460315	66460315	rs2909213	Reticulocyte_count_EUR,Reticulocyte_fraction_of_red_cells_EUR	0	0	0	0	0	EBNA2_gain_loop	chr17	66456610	66460599	loop_3047
chr17	72744512	72744512	rs2384952	Monocyte_count_EUR,Monocyte_percentage_of_white_cells_EUR	0	0	1	0	0	EBNA2_gain_loop	chr17	72744172	72746362	loop_3060
chr17	72744583	72744583	rs2384953	Monocyte_count_EUR,Monocyte_percentage_of_white_cells_EUR	0	0	1	0	0	EBNA2_gain_loop	chr17	72744172	72746362	loop_3060
chr17	73317510	73317510	rs12943707	Systemic_lupus_erythematosus_AFR	1	1	1	0	0	EBNA2_loss_loop	chr17	73315090	73317711	loop_110
chr17	73391145	73391145	rs4788891	Systemic_lupus_erythematosus_EUR	1	1	1	0	0	EBNA2_gain_loop	chr17	73389598	73391549	loop_3063
chr17	73391277	73391277	rs4788892	Systemic_lupus_erythematosus_EUR	1	1	1	0	0	EBNA2_gain_loop	chr17	73389598	73391549	loop_3063
chr17	73851791	73851791	rs1463485	White_matter_hyperintensity_burden_EAS,White_matter_hyperintensity_burden_EUR	0	0	0	0	0	EBNA2_gain_loop	chr17	73851128	73853194	loop_3065
chr17	73851791	73851791	rs1463485	White_matter_hyperintensity_burden_EAS,White_matter_hyperintensity_burden_EUR	0	0	0	0	0	EBNA2_loss_loop	chr17	73851128	73853194	loop_112
chr17	73852008	73852008	rs936394	White_matter_hyperintensity_burden_AMR,White_matter_hyperintensity_burden_EAS,White_matter_hyperintensity_burden_EUR	0	0	0	0	0	EBNA2_gain_loop	chr17	73851128	73853194	loop_3065
chr17	73852008	73852008	rs936394	White_matter_hyperintensity_burden_AMR,White_matter_hyperintensity_burden_EAS,White_matter_hyperintensity_burden_EUR	0	0	0	0	0	EBNA2_loss_loop	chr17	73851128	73853194	loop_112
chr17	73852407	73852407	rs112700585	White_matter_hyperintensity_burden_AMR,White_matter_hyperintensity_burden_EAS,White_matter_hyperintensity_burden_EUR	0	0	0	0	0	EBNA2_gain_loop	chr17	73851128	73853194	loop_3065
chr17	73852407	73852407	rs112700585	White_matter_hyperintensity_burden_AMR,White_matter_hyperintensity_burden_EAS,White_matter_hyperintensity_burden_EUR	0	0	0	0	0	EBNA2_loss_loop	chr17	73851128	73853194	loop_112
chr17	73852890	73852890	rs56760067	White_matter_hyperintensity_burden_AMR,White_matter_hyperintensity_burden_EAS,White_matter_hyperintensity_burden_EUR	0	0	0	0	0	EBNA2_gain_loop	chr17	73851128	73853194	loop_3065
chr17	73852890	73852890	rs56760067	White_matter_hyperintensity_burden_AMR,White_matter_hyperintensity_burden_EAS,White_matter_hyperintensity_burden_EUR	0	0	0	0	0	EBNA2_loss_loop	chr17	73851128	73853194	loop_112
chr17	73853073	73853073	chr17_73853073	White_matter_hyperintensity_burden_EAS,White_matter_hyperintensity_burden_EUR	0	0	0	0	0	EBNA2_gain_loop	chr17	73851128	73853194	loop_3065
chr17	73853073	73853073	chr17_73853073	White_matter_hyperintensity_burden_EAS,White_matter_hyperintensity_burden_EUR	0	0	0	0	0	EBNA2_loss_loop	chr17	73851128	73853194	loop_112
chr17	74733403	74733403	rs3744061	Highest_math_class_taken__MTAG_EUR	0	0	0	0	0	EBNA2_gain_loop	chr17	74731891	74735786	loop_3071
chr17	78586382	78586382	rs79155262	Blood_protein_levels_EUR	0	0	0	0	0	EBNA2_loss_loop	chr17	78586032	78589142	loop_115
chr17	78586542	78586542	rs112329494	Blood_protein_levels_EUR	0	0	0	0	0	EBNA2_loss_loop	chr17	78586032	78589142	loop_115
chr17	78588202	78588202	rs12939613	BMI__adjusted_for_smoking_behaviour_AMR,Body_mass_index_AMR,BMI__adjusted_for_smoking_behaviour_EAS,Body_mass_index_EAS,BMI__adjusted_for_smoking_behaviour_EUR,Body_mass_index_EUR,Obesity_EUR,BMI__adjusted_for_smoking_behaviour_SAS	0	0	0	0	0	EBNA2_loss_loop	chr17	78586032	78589142	loop_115
chr18	12838766	12838766	rs144220743	Esophageal_cancer__squamous_cell_EAS,C_reactive_protein_levels_EUR	0	0	0	0	0	EBNA2_gain_loop	chr18	12838539	12840093	loop_3121
chr18	12882359	12882359	rs4797709	Esophageal_cancer__squamous_cell_EAS,C_reactive_protein_levels_EUR	0	0	0	0	0	EBNA2_gain_loop	chr18	12881522	12886042	loop_3121
chr18	12883939	12883939	rs9961931	Rheumatoid_arthritis_AFR	1	1	1	0	1	EBNA2_gain_loop	chr18	12881522	12886042	loop_3121
chr18	12884343	12884343	rs2292759	Esophageal_cancer__squamous_cell_EAS,C_reactive_protein_levels_EUR	0	0	0	0	0	EBNA2_gain_loop	chr18	12881522	12886042	loop_3121
chr18	12884676	12884676	rs8098730	Rheumatoid_arthritis_AFR	1	1	1	0	1	EBNA2_gain_loop	chr18	12881522	12886042	loop_3121
chr18	12885120	12885120	rs149850873	Juvenile_idiopathic_arthritis_CAGE_curated	1	0	1	0	0	EBNA2_gain_loop	chr18	12881522	12886042	loop_3121
chr18	12885577	12885577	rs35923716	Chronic_inflammatory_diseases__ankylosing_spondylitis__Crohn_s_disease__psoriasis__primary_sclerosing_cholangitis__ulcerative_colitis___pleiotropy_EUR	1	1	1	0	1	EBNA2_gain_loop	chr18	12881522	12886042	loop_3121
chr18	20715656	20715656	rs113232639	Mean_platelet_volume_EUR,Platelet_count_EUR,Platelet_distribution_width_EUR,Plateletcrit_EUR	0	0	0	0	0	EBNA2_gain_loop	chr18	20713173	20716687	loop_3124
chr18	20872271	20872271	rs79708651	Worry_too_long_after_an_embarrassing_experience_EUR	0	0	0	0	0	EBNA2_gain_loop	chr18	20870991	20872692	loop_3126
chr18	20872284	20872284	rs77068532	Worry_too_long_after_an_embarrassing_experience_EUR	0	0	0	0	0	EBNA2_gain_loop	chr18	20870991	20872692	loop_3126
chr18	46356959	46356959	rs78727435	Male_pattern_baldness_EUR	0	0	0	0	0	EBNA2_gain_loop	chr18	46356772	46362564	loop_3143
chr18	46358155	46358155	rs57656389	Male_pattern_baldness_EUR	0	0	0	0	0	EBNA2_gain_loop	chr18	46356772	46362564	loop_3143
chr18	46358560	46358560	rs59234397	Male_pattern_baldness_EUR	0	0	0	0	0	EBNA2_gain_loop	chr18	46356772	46362564	loop_3143
chr18	46358787	46358787	rs74450593	Male_pattern_baldness_EUR	0	0	0	0	0	EBNA2_gain_loop	chr18	46356772	46362564	loop_3143
chr18	46359103	46359103	rs75334395	Male_pattern_baldness_EUR	0	0	0	0	0	EBNA2_gain_loop	chr18	46356772	46362564	loop_3143
chr18	46359377	46359377	rs28583417	Male_pattern_baldness_EUR	0	0	0	0	0	EBNA2_gain_loop	chr18	46356772	46362564	loop_3143
chr18	46359856	46359856	rs140816759	Normal_facial_asymmetry__angle_of_surface_orientation_score_EUR	0	0	0	0	0	EBNA2_gain_loop	chr18	46356772	46362564	loop_3143
chr18	46360154	46360154	rs113620660	Normal_facial_asymmetry__angle_of_surface_orientation_score_EUR	0	0	0	0	0	EBNA2_gain_loop	chr18	46356772	46362564	loop_3143
chr18	46360241	46360241	rs76012792	Normal_facial_asymmetry__angle_of_surface_orientation_score_EUR	0	0	0	0	0	EBNA2_gain_loop	chr18	46356772	46362564	loop_3143
chr18	46395022	46395022	rs7240004	Inflammatory_bowel_disease_EUR,Ulcerative_colitis_EUR	0	0	1	0	1	EBNA2_gain_loop	chr18	46394255	46397380	loop_3141
chr18	46549258	46549258	chr18_46549258	Normal_facial_asymmetry__angle_of_surface_orientation_score_EUR	0	0	0	0	0	EBNA2_loss_loop	chr18	46547442	46552189	loop_117
chr18	46585187	46585187	rs13380996	Height_EAS	0	0	0	0	0	EBNA2_loss_loop	chr18	46584752	46587376	loop_117
chr18	46585235	46585235	rs357900	Height_AFR,Height_EUR	0	0	0	0	0	EBNA2_loss_loop	chr18	46584752	46587376	loop_117
chr18	46585821	46585821	rs357901	Height_AFR,Height_EUR	0	0	0	0	0	EBNA2_loss_loop	chr18	46584752	46587376	loop_117
chr18	48679116	48679116	rs12455399	Platelet_count_EUR,Plateletcrit_EUR	0	0	0	0	0	EBNA2_gain_loop	chr18	48677461	48682752	loop_3146
chr18	48679150	48679150	rs12458093	Platelet_count_EUR,Plateletcrit_EUR	0	0	0	0	0	EBNA2_gain_loop	chr18	48677461	48682752	loop_3146
chr18	48679522	48679522	rs9963878	Atrial_fibrillation_EUR	0	0	0	0	0	EBNA2_gain_loop	chr18	48677461	48682752	loop_3146
chr18	48679989	48679989	rs7242459	Atrial_fibrillation_EUR,Educational_attainment__MTAG_EUR,Highest_math_class_taken__MTAG_EUR	0	0	0	0	0	EBNA2_gain_loop	chr18	48677461	48682752	loop_3146
chr18	48681350	48681350	rs1539859	Atrial_fibrillation_EUR,Educational_attainment__MTAG_EUR,Highest_math_class_taken__MTAG_EUR	0	0	0	0	0	EBNA2_gain_loop	chr18	48677461	48682752	loop_3146
chr18	48681359	48681359	rs73960373	Atrial_fibrillation_EUR	0	0	0	0	0	EBNA2_gain_loop	chr18	48677461	48682752	loop_3146
chr18	53099661	53099661	rs76686893	Heel_bone_mineral_density_EUR,Irritable_mood_EUR	0	0	0	0	0	EBNA2_gain_loop	chr18	53099308	53102252	loop_3149
chr18	53101598	53101598	rs12958048	Heel_bone_mineral_density_EUR,Irritable_mood_EUR	0	0	0	0	0	EBNA2_gain_loop	chr18	53099308	53102252	loop_3149
chr18	53101703	53101703	rs4801153	Irritable_mood_EUR	0	0	0	0	0	EBNA2_gain_loop	chr18	53099308	53102252	loop_3149
chr18	53101860	53101860	rs12969536	Heel_bone_mineral_density_EUR,Irritable_mood_EUR	0	0	0	0	0	EBNA2_gain_loop	chr18	53099308	53102252	loop_3149
chr18	53101904	53101904	rs12969553	Cognitive_performance__MTAG_EUR,Feeling_worry_EUR,Heel_bone_mineral_density_EUR,Highest_math_class_taken__MTAG_EUR,Neurociticism_EUR	0	0	0	0	0	EBNA2_gain_loop	chr18	53099308	53102252	loop_3149
chr18	53101984	53101984	rs4801154	Irritable_mood_EUR	0	0	0	0	0	EBNA2_gain_loop	chr18	53099308	53102252	loop_3149
chr18	53132798	53132798	rs151311553	Number_of_sexual_partners_EUR	0	0	0	0	0	EBNA2_gain_loop	chr18	53131786	53134281	loop_3149
chr19	907352	907352	rs200489514	High_light_scatter_reticulocyte_count_EUR,High_light_scatter_reticulocyte_percentage_of_red_cells_EUR,Immature_fraction_of_reticulocytes_EUR,Reticulocyte_count_EUR,Reticulocyte_fraction_of_red_cells_EUR	0	0	0	0	0	EBNA2_gain_loop	chr19	907052	910818	loop_3160
chr19	1248185	1248185	rs369836679	Male_pattern_baldness_EUR	0	0	0	0	0	EBNA2_gain_loop	chr19	1247369	1248965	loop_3165
chr19	1855583	1855583	rs74401481	Mean_corpuscular_hemoglobin_EUR,Mean_corpuscular_volume_EUR	0	0	0	0	0	EBNA2_gain_loop	chr19	1854828	1857860	loop_3180
chr19	1857297	1857297	rs10411759	Cognitive_performance__MTAG_EUR,Educational_attainment__MTAG_EUR,Educational_attainment__years_of_education_EUR,Highest_math_class_taken__MTAG_EUR	0	0	0	0	0	EBNA2_gain_loop	chr19	1854828	1857860	loop_3180
chr19	1857490	1857490	rs10413786	Cognitive_performance__MTAG_EUR,Educational_attainment__MTAG_EUR,Educational_attainment__years_of_education_EUR,Highest_math_class_taken__MTAG_EUR	0	0	0	0	0	EBNA2_gain_loop	chr19	1854828	1857860	loop_3180
chr19	1857674	1857674	rs10412637	Cognitive_performance__MTAG_EUR,Educational_attainment__MTAG_EUR,Educational_attainment__years_of_education_EUR,Highest_math_class_taken__MTAG_EUR	0	0	0	0	0	EBNA2_gain_loop	chr19	1854828	1857860	loop_3180
chr19	2042285	2042285	rs71337080	Self_reported_math_ability_EUR	0	0	0	0	0	EBNA2_gain_loop	chr19	2039012	2044364	loop_3185
chr19	2043271	2043271	rs2302585	Self_reported_math_ability_EUR	0	0	0	0	0	EBNA2_gain_loop	chr19	2039012	2044364	loop_3185
chr19	2050823	2050823	rs3746101	Nonsyndromic_cleft_lip_with_or_without_cleft_palate_EAS	0	0	0	0	0	EBNA2_gain_loop	chr19	2050713	2053571	loop_3185
chr19	2163490	2163490	rs113216500	Hematocrit_EAS,Hemoglobin_EAS,Red_blood_cell_count_EAS	0	0	0	0	0	EBNA2_gain_loop	chr19	2162954	2165798	loop_3188
chr19	2163771	2163771	rs36065733	Hematocrit_EAS,Hemoglobin_EAS,Red_blood_cell_count_EAS,Fat_free_mass_EUR,Hematocrit_EUR,Hemoglobin_concentration_EUR,Red_blood_cell_count_EUR	0	0	0	0	0	EBNA2_gain_loop	chr19	2162954	2165798	loop_3188
chr19	2164351	2164351	rs12985346	Heel_bone_mineral_density_EUR,Height_EUR,Hip_circumference_adjusted_for_BMI_EUR,Hip_minimal_joint_space_width_EUR,Osteoarthritis_EUR	0	0	0	0	0	EBNA2_gain_loop	chr19	2162954	2165798	loop_3188
chr19	2165197	2165197	rs12985980	Heel_bone_mineral_density_EUR,Height_EUR,Hip_circumference_adjusted_for_BMI_EUR,Hip_minimal_joint_space_width_EUR,Osteoarthritis_EUR	0	0	0	0	0	EBNA2_gain_loop	chr19	2162954	2165798	loop_3188
chr19	2682749	2682749	rs8111268	Chronotype_EUR	0	0	0	0	0	EBNA2_gain_loop	chr19	2679072	2683006	loop_3192
chr19	2682862	2682862	rs12609683	Chronotype_EUR	0	0	0	0	0	EBNA2_gain_loop	chr19	2679072	2683006	loop_3192
chr19	3176170	3176170	rs3760960	Monocyte_percentage_of_white_cells_EUR	0	0	1	0	0	EBNA2_gain_loop	chr19	3171973	3181490	loop_3208
chr19	3179517	3179517	rs61731111	Eosinophil_counts_EUR,Eosinophil_percentage_of_granulocytes_EUR,Eosinophil_percentage_of_white_cells_EUR,Neutrophil_percentage_of_granulocytes_EUR,Sum_eosinophil_basophil_counts_EUR	0	0	1	0	0	EBNA2_gain_loop	chr19	3171973	3181490	loop_3208
chr19	3180803	3180803	rs311629	White_blood_cell_count_EAS	0	0	1	0	0	EBNA2_gain_loop	chr19	3171973	3181490	loop_3208
chr19	3434028	3434028	rs2074977	Height_EUR	0	0	0	0	0	EBNA2_gain_loop	chr19	3433065	3436245	loop_3208
chr19	3434715	3434715	rs2074978	Height_EUR	0	0	0	0	0	EBNA2_gain_loop	chr19	3433065	3436245	loop_3208
[truncated: 2,525 more rows]

## Sheet: Pairwise intersections
CHR	CHR_START	CHR_END	RSID	Phenotype_Ancestry	CHR	CHR_START	CHR_END	DATA_TYPE	DATA_TYPE	CHR	CHR_START	CHR_END	GENE
chr3	119278457	119278457	rs41271391	Vitiligo_EUR	chr3	119278417	119278683	EBNA2_open_chrom	EBNA2_up_genes	chr3	119277980	119278980	CD80
chr3	119278468	119278468	rs16829980	Vitiligo_EUR	chr3	119278417	119278683	EBNA2_open_chrom	EBNA2_up_genes	chr3	119277980	119278980	CD80
chr16	11181756	11181756	rs7204099	Systemic_lupus_erythematosus_AMR,Multiple_sclerosis_EUR,Primary_biliary_cholangitis_EUR,Primary_biliary_cirrhosis_EUR,Primary_sclerosing_cholangitis_EUR,,Systemic_lupus_erythematosus_EUR,Type_1_diabetes_EUR	chr16	11181679	11182296	EBNA2_closed_chrom	EBNA2_gain_loop	chr16	11179067	11184564	loop_2687
chr16	11182134	11182134	rs7203793	Systemic_lupus_erythematosus_AFR,Systemic_lupus_erythematosus_AMR,Multiple_sclerosis_EUR,Primary_biliary_cholangitis_EUR,Primary_biliary_cirrhosis_EUR,Primary_sclerosing_cholangitis_EUR,,Systemic_lupus_erythematosus_EUR,Type_1_diabetes_EU	chr16	11181679	11182296	EBNA2_closed_chrom	EBNA2_gain_loop	chr16	11179067	11184564	loop_2687
chr6	35265418	35265418	rs4711414	Systemic_lupus_erythematosus-EUR+AFR+EAS+AMR	chr6	35265366	35265822	EBNA2_closed_chrom	EBNA2_gain_loop	chr6	35262649	35267482	loop_1231
chr6	35265418	35265418	rs4711414	Systemic_lupus_erythematosus-EUR+AFR+EAS+AMR	chr6	35265366	35265822	EBNA2_closed_chrom	EBNA2_loss_loop	chr6	35262649	35267482	loop_262
chr6	42007402	42007403	rs67289879	Inflammatory_bowel_disease_EUR	chr6	42007107	42007639	EBNA2_closed_chrom	EBNA2_gain_loop	chr6	42006052	42007931	loop_1246
chr17	5136761	5136761	rs74859829	Rheumatoid_arthritis_EUR	chr17	5135141	5139202	EBNA2_gain_loop	EBNA2_loss_genes	chr17	5137654	5138654	SCIMP
chr5	173312729	173312730	rs56364564	S,Chronic_inflammatory_diseases_ankylosing_spondylitis_Crohn_s_disease_psoriasis__primary_sclerosing_cholangitis_ulcerative_colitis_pleiotropy_EUR,Inflammatory_bowel_disease_EUR,	chr5	173311091	173315985	EBNA2_gain_loop	EBNA2_gain_genes	chr5	173314830	173315830	CPEB4
chr5	173312891	173312892	rs144869372	Chronic_inflammatory_diseases_ankylosing_spondylitis_Crohn_s_disease_psoriasis_primary_sclerosing_cholangitis_ulcerative_colitis_pleiotropy_EUR,,Inflammatory_bowel_disease_EUR	chr5	173311091	173315985	EBNA2_gain_loop	EBNA2_gain_genes	chr5	173314830	173315830	CPEB4
chr6	138187498	138187498	rs5029924	Systemic_lupus_erythematosus_AFR,Systemic_lupus_erythematosus_AMR,,Rheumatoid_arthritis_EUR,Systemic_lupus_erythematosus_EUR,Systemic_lupus_erythematosus_or_rheumatoid_arthritis_EUR	chr6	138187326	138190009	EBNA2_gain_loop	EBNA2_gain_genes	chr6	138187824	138188824	TNFAIP3
[truncated: 7 more rows]

## Sheet: Summary
	Disease SNPS	Autoimmune SNPS	Chronic_inflammatory_diseases__ankylosing_spondylitis__Crohn_s_disease__psoriasis__primary_sclerosing_cholangitis__ulcerative_colitis___pleiotropy_EUR	Rheumatoid_arthritis_EUR	Multiple_sclerosis_EUR	Systemic_lupus_erythematosus_EUR	Rheumatoid_arthritis_EAS	Psoriasis_EUR	Rheumatoid_arthritis_AFR	Type_1_diabetes_EUR	Systemic_lupus_erythematosus_AMR	Systemic_lupus_erythematosus_AFR	Systemic_lupus_erythematosus_EAS	Vitiligo_EUR	Rheumatoid_arthritis__ACPA_positive_EUR	Inflammatory_bowel_disease_EUR	Crohn_s_disease_EUR	Ulcerative_colitis_EUR	Crohn_s_disease_EAS	Inflammatory_bowel_disease_EAS	Ulcerative_colitis_EAS	Celiac_disease_EUR	Inflammatory_skin_disease_EUR	Rheumatoid_arthritis__ACPA_positive_EAS	Primary_biliary_cholangitis_EUR	Primary_biliary_cirrhosis_EUR	Ankylosing_spondylitis_EUR	Pediatric_autoimmune_diseases_EUR	Ankylosing_spondylitis_EAS	Systemic_seropositive_rheumatic_diseases__Systemic_sclerosis_or_systemic_lupus_erythematosus_or_rheumatoid_arthritis_or_idiopathic_inflammatory_myopathies_EUR	Osteoarthritis_of_the_hip_or_knee_EUR	Graves__disease_EAS	Primary_biliary_cholangitis_EAS	Psoriasis_EAS	Juvenile_idiopathic_arthritis__oligoarticular_or_rheumatoid_factor_negative_polyarticular_EUR	Primary_sclerosing_cholangitis_EUR	Systemic_sclerosis_EUR	Celiac_disease_or_Rheumatoid_arthritis_EUR	Systemic_lupus_erythematosus_and_Systemic_sclerosis_EUR	Alopecia_areata_EUR	Celiac_disease_SAS	Psoriatic_arthritis_AMR	Psoriatic_arthritis_EUR	Sarcoidosis_EUR	Systemic_lupus_erythematosus_or_rheumatoid_arthritis_EUR	Vitiligo_EAS	Cutaneous_psoriasis_EUR	Myasthenia_gravis_EUR	Type_1_diabetes_and_autoimmune_thyroid_diseases_EUR
[truncated: 8 more rows]
